# Supplementary material for: The Expression and Role Analysis of Methylation-Regulated Differentially Expressed Gene UBE2C in Pan-Cancer, Especially for HGSOC
Source: Cancers (Basel). 2022 Jun 25;14(13):3121. doi: 10.3390/cancers14133121 (PMC9264902; doi:10.3390/cancers14133121)
Supplement: Supplementary file 1 [file cancers-14-03121-s001.zip]

Archive with 10 entries (10 files):
- cancers-1717224-supplementary-Figures.pdf
- Table S1. The BSP primers of UBE2C.xlsx
- Table S2. The DEGs in the GSE69428 dataset.xlsx
- Table S3. The DEGs in the GSE18520 dataset.xlsx
- Table S4. The DEGs in the GSE54388 dataset.xlsx
- Table S5. The DEGs in the GSE27651 dataset.xlsx
- Table S6. DMGs with high methylation sites and low methyla-tion sites in the GSE133556 dataset.xlsx
- Table S7. MeDEGs in the GSE133556 dataset.xlsx
- Table S8. GO analysis of the hub genes.xls
- Table S9. The DNA methylation levels of UBE2C in IOSE-80, A2780, and SKOV3 cells.xlsx
