# Supplementary material for: The Expression and Role Analysis of Methylation-Regulated Differentially Expressed Gene UBE2C in Pan-Cancer, Especially for HGSOC
Source: Cancers (Basel). 2022 Jun 25;14(13):3121. doi: 10.3390/cancers14133121 (PMC9264902; doi:10.3390/cancers14133121)
Supplement: Supplementary file 1 [file cancers-14-03121-s001.zip › Table S1. The BSP primers of UBE2C.xlsx]

## Sheet: primer
targetSeq	ForwardPrimer	Start	End	ReversePrimer	Start	End
UBE2C	TTTGGGTTTAAGTGATTTTTTTGTTTGG	1574	1601	CTATTAAAAAACATAAATCCATACATCTCC	1689	1718
UBE2C	TTTAGGAYGTAGTAAAGGTGTTTAGG	1778	1803	CTCCTTCTAACTACACRTCTTACTCC	1903	1928
UBE2C	TTGGATTAAATTTAAGYGAGTTATTGATTGG	2134	2164	AACCRCATCACTCACCTTTTACCCAC	2361	2386
UBE2C	AGAGTAAAGATTTTTAGGATTATTTTTYGTYGTTATTTT	2428	2466	CATTCTCCTTCRAAAAAATCTCAAAAAAC	2623	2651
