# Supplementary material for: The Expression and Role Analysis of Methylation-Regulated Differentially Expressed Gene UBE2C in Pan-Cancer, Especially for HGSOC
Source: Cancers (Basel). 2022 Jun 25;14(13):3121. doi: 10.3390/cancers14133121 (PMC9264902; doi:10.3390/cancers14133121)
Supplement: Supplementary file 1 [file cancers-14-03121-s001.zip › Table S2. The DEGs in the GSE69428 dataset.xlsx]

## Sheet: up_HGSOC_vs_normal
#log2FC >= 0.585 #p-value cut-off <= 0.05 #q-value cut-off <= 1.00 #Condition pair: up_HGSOC_vs_normal
Group.1	log2FC	p_value	q_value	HGSOC	normal	GSM1701025	GSM1701026	GSM1701027	GSM1701028	GSM1701029	GSM1701030	GSM1701031	GSM1701032	GSM1701033	GSM1701034	GSM1701035	GSM1701036	GSM1701037	GSM1701038	GSM1701039	GSM1701040	GSM1701041	GSM1701042	GSM1701043	GSM1701044
AATF	0.598535	0.00887044	0.0608318	6.58558	5.98705	7.4851	7.37282	6.38634	6.061	6.4115	6.28781	6.62334	6.54889	6.12139	6.55761	5.85219	6.25798	6.20657	4.74802	6.22005	6.28164	6.01714	6.10417	5.81411	6.36858
ABCA3	0.663003	0.0148528	0.0855681	5.6921	5.0291	6.69743	5.70137	5.60298	5.97308	6.06859	4.31919	5.56868	5.46174	5.45003	6.07789	5.13689	4.07677	5.10894	6.19991	5.03989	5.1173	4.51595	4.73399	5.12579	5.23553
ABCC1	0.999902	1.42058e-07	2.37774e-05	6.19496	5.19505	6.23187	5.70694	6.4258	6.24112	6.25773	5.83359	6.63059	6.48083	5.81074	6.33034	5.21946	5.01336	5.51376	4.94454	4.89955	5.06576	5.10385	5.52119	5.24704	5.42201
ABCF3	0.590956	0.0304487	0.139297	5.60579	5.01484	6.67661	6.1385	5.12901	5.06199	5.63763	4.82551	5.83916	5.8444	5.24948	5.65562	4.63602	4.7819	4.65756	6.74833	4.86807	5.0131	4.64392	5.0052	5.03639	4.75787
AC007389.3	0.7296	3.73362e-05	0.00121026	4.6036	3.874	4.49599	4.80605	5.13817	3.92953	4.56543	4.60665	4.84079	5.03232	4.18311	4.43796	3.80407	4.24065	3.84684	3.76286	3.95957	3.92317	4.15554	3.48535	3.78429	3.77768
AC009237.8	1.28096	0.0105435	0.0673243	5.74019	4.45923	6.88652	5.54944	6.45895	5.07554	5.95327	5.49844	5.44347	5.82317	5.54109	5.17197	4.70157	4.24065	4.07132	8.06442	4.55484	3.88085	2.96925	3.07308	3.93896	5.09731
ACAA1	0.670555	0.00135911	0.0160973	7.69091	7.02035	9.11703	7.5077	7.20787	7.6818	7.86756	7.253	7.5039	7.62202	7.55904	7.58918	7.34427	7.12498	7.05872	6.57713	6.77557	7.07845	6.94725	6.97562	7.2722	7.04935
ACOT7	0.672572	0.000569576	0.00870805	4.67213	3.99956	4.7731	5.31491	4.53269	4.93969	4.7366	4.84497	4.40584	4.46587	4.08262	4.62504	4.06644	4.22595	4.05087	4.73112	4.072	3.8006	3.70849	3.58276	3.36497	4.39243
ACOT8	0.783886	0.00068495	0.00991842	5.93299	5.1491	5.92812	6.05231	5.44313	5.91368	5.63435	5.80306	6.59849	5.66031	5.87145	6.42499	4.76163	5.01988	5.23938	5.9678	5.45513	5.48425	5.29071	5.50418	4.10781	4.66024
ACP1	0.610887	0.00372669	0.0326378	5.68851	5.07762	5.83359	5.52548	6.02827	5.89066	4.88125	6.06668	5.21389	5.92635	6.02759	5.49136	4.83451	5.6926	5.43622	4.17136	4.84724	5.04643	5.65462	5.0488	5.16322	4.88125
ACP2	0.628387	0.00648454	0.0483419	6.36305	5.73466	6.14682	6.27642	5.4127	6.2917	6.44808	6.89915	7.32594	5.77055	6.46776	6.5914	5.66562	5.70855	6.08395	5.18309	5.81053	5.93003	4.95387	5.66741	6.30499	6.0386
ACSF2	0.740144	0.0322831	0.144531	6.28773	5.54759	6.78052	5.33688	5.74896	7.07619	5.91264	6.21226	6.98681	4.78482	7.36042	6.67781	4.92826	5.10043	5.27086	7.24334	5.88974	4.88202	5.48712	5.58649	5.31303	5.77458
ACTL6A	1.49137	0.000149734	0.00333501	7.36886	5.87749	8.20348	7.86659	7.05091	7.92238	6.95157	6.70255	7.06172	6.67486	8.11117	7.14339	6.16874	6.68639	6.43135	3.52308	6.04485	6.26566	5.97363	5.29301	6.15174	6.23648
ACTR2	0.63669	0.00363258	0.0320503	6.22447	5.58778	5.67793	5.70404	6.4639	6.76855	6.20475	6.18098	5.82694	6.29936	6.444	6.67421	5.78367	5.8613	5.85168	4.26671	5.58344	5.75869	5.4927	5.46349	6.00159	5.81451
ACTR5	0.785458	0.000449179	0.00747764	5.45405	4.6686	6.3958	5.11254	5.6553	5.08758	5.0607	5.15017	6.21226	5.61468	4.9123	5.33922	4.86776	4.43315	4.34067	4.67557	4.61676	4.22137	5.34104	4.71532	4.98274	4.49159
ADA	0.720211	0.00160053	0.0180272	4.80124	4.08103	4.79166	4.98866	4.74435	5.31735	5.00638	4.56359	5.91805	4.29891	4.03467	4.34876	3.75062	3.89664	4.13267	4.83451	3.92672	3.76383	3.99866	3.86709	4.21807	4.42144
ADAM32	1.27212	0.00666444	0.049369	3.72738	2.45526	6.51733	2.41745	4.39935	2.46577	2.87257	5.27642	2.93297	4.502	2.48252	3.4074	2.54096	2.9022	2.33814	2.03881	2.49457	2.80162	2.29655	2.53318	2.47255	2.13401
ADAR	0.743932	0.000787502	0.0109917	10.5647	9.82078	11.1945	10.7295	10.6579	10.6168	11.133	10.1993	10.9033	9.98469	9.58098	10.6473	9.71851	9.64576	9.71851	9.28475	10.5643	9.84429	9.57339	9.93945	9.8389	10.0799
ADNP	0.96814	0.0263733	0.126253	8.88644	7.9183	8.02672	8.40008	9.05604	8.59998	8.67444	9.05949	9.04894	9.48548	9.14124	9.37195	8.42819	8.14097	8.45578	4.31248	8.53519	8.26148	8.02165	8.2658	8.0516	8.70981
ADRM1	0.754702	0.00333077	0.0302729	5.16595	4.41124	5.60054	5.22288	4.43384	5.24357	5.31336	4.95985	6.62444	4.64971	4.2109	5.40036	4.83914	4.14085	4.61645	4.13543	4.15308	4.47452	4.00019	4.77068	4.26585	4.71627
AFG3L2	0.955935	7.01011e-06	0.000346533	9.53886	8.58293	9.96042	10.1993	10.1436	9.3672	9.64848	9.43475	9.16913	9.25983	9.05741	9.14855	8.58597	8.77135	8.53738	9.12485	8.67623	8.17763	8.23041	8.45578	8.51959	8.7501
AGO2	0.924958	0.0121614	0.0747494	5.36054	4.43558	5.14471	6.59263	6.59902	4.34369	4.83169	5.97948	4.44849	5.04089	5.27878	5.34601	4.60346	4.93563	4.49431	2.8788	3.23146	4.37309	4.52236	5.18513	5.3681	4.76348
AHCY	0.870397	8.03204e-05	0.00210823	9.12755	8.25715	9.35336	9.09099	9.10082	9.51676	8.30235	8.85434	8.82054	9.56445	9.3501	9.32179	8.2416	8.89645	8.72977	7.61803	7.83343	7.88683	8.34166	7.98234	8.56816	8.47327
AIF1L	1.35892	6.29209e-05	0.00176337	6.57646	5.21754	7.30146	6.79566	5.51676	6.25016	7.74696	7.16276	6.85552	6.43593	5.89674	5.80263	5.6537	5.67431	4.70248	5.88452	5.1911	4.46411	4.71954	4.59859	5.66871	5.61836
AIM1L	0.762842	0.000153176	0.00340315	4.781	4.01815	5.50981	5.42666	4.26641	4.87471	4.90173	5.21425	4.75979	4.49232	4.1986	4.16567	4.08951	4.05652	4.09006	4.20293	3.74589	4.2109	3.9584	3.77214	3.95496	4.10021
AJAP1	0.652315	0.0352068	0.153752	3.58267	2.93036	2.89621	3.86521	2.82214	2.89046	3.96312	3.93988	5.72305	3.1546	2.79682	3.7752	2.56379	2.82918	2.87755	3.75868	3.23959	2.6557	2.93836	2.80578	2.7564	2.87853
AJUBA	2.06052	1.44977e-05	0.000600001	5.84302	3.78251	6.82339	5.07517	7.08325	6.27144	4.43968	5.54799	5.36338	5.95872	6.42085	5.44636	4.51562	4.7008	4.28352	1.50826	3.45716	3.95512	3.38778	3.54234	4.2954	4.17904
AK023627	1.30767	0.0018209	0.019723	4.12403	2.81636	4.02708	5.16082	4.45611	3.47091	2.99012	3.16046	3.8898	5.09786	6.16441	2.82269	2.19038	4.01206	2.97343	3.01835	2.75188	3.09928	3.11271	2.57484	2.3927	2.03792
AK2	0.689124	0.0182667	0.0984181	5.66737	4.97824	6.33874	6.24867	6.26267	4.7841	5.38507	5.4399	5.55744	5.25201	6.25608	5.14899	5.10245	5.51458	5.27913	3.06824	5.10742	5.1254	5.3716	5.04821	4.93969	5.22571
AK4	0.895229	0.00174612	0.0191367	6.51581	5.62058	6.02709	7.13676	7.01854	7.11513	6.7268	7.52828	5.3902	5.97166	6.59849	5.64516	5.7948	6.0907	5.71218	5.64259	5.03019	6.13979	5.1066	5.92191	5.14149	5.62558
AKR1B1	0.820119	0.00277569	0.0266287	7.50322	6.6831	8.08658	7.31661	7.4587	8.18868	5.93769	7.48446	8.51959	7.27728	7.27281	7.48982	6.04794	6.53453	6.71249	7.01466	6.89245	6.59263	6.50853	6.24923	6.98747	7.29112
AKR1B10	0.730694	0.019786	0.104052	3.7224	2.9917	4.06975	5.47195	3.75677	3.13559	3.6515	3.35799	3.23979	2.7035	4.82057	3.01655	2.82551	2.676	2.76477	3.94201	2.70417	3.18113	2.58492	2.6377	3.40887	3.19194
AL590762.11	0.59015	0.0191128	0.101714	5.70774	5.11759	6.72882	5.34564	5.55114	5.74451	5.26371	4.84913	6.30839	5.31118	5.32875	6.64616	5.41785	5.12081	5.1911	5.82846	5.2686	5.32123	4.30121	5.13817	4.70327	4.88525
AL832163	0.644145	0.0149952	0.0861932	2.49287	1.84873	1.92708	2.19108	3.40593	1.88794	1.56499	3.24018	2.09582	2.05841	3.98721	2.57012	1.64312	1.84999	1.85072	1.98159	1.80255	1.77273	2.10644	1.885	1.74809	1.84707
ALDOA	1.21199	0.000116755	0.00277722	9.91329	8.7013	9.79287	11.5678	10.05	10.5249	9.72683	9.84429	9.62568	8.82181	9.88228	9.29639	8.29294	9.29639	9.15551	8.04248	8.56031	9.07401	8.46164	8.53233	8.48243	9.11497
ALG3	1.54562	8.74604e-08	1.85631e-05	7.33514	5.78953	8.53738	7.25615	6.89393	7.34226	7.4563	6.79277	7.73455	7.11861	7.07755	7.14197	6.01222	5.87674	5.84155	6.65801	5.50021	5.64862	5.31336	5.4974	5.83418	5.713
ALG8	0.984913	0.0104656	0.0670675	7.632	6.64708	7.56495	7.57148	8.34055	7.34161	7.49382	7.83011	7.4261	7.70868	7.36164	7.68103	6.95222	7.14552	7.0251	3.4628	6.99446	7.08253	6.75654	6.95917	7.40186	6.69064
ALK	1.57995	0.000138902	0.00314091	5.05955	3.4796	4.32853	3.63236	5.98105	4.75787	5.97015	3.84548	6.40513	5.47326	4.05147	6.15019	3.54466	2.8507	3.01254	4.35972	3.34856	3.48317	3.42084	3.2726	3.63203	3.87119
AMOTL2	0.842471	0.0305866	0.139856	8.74954	7.90707	9.39916	7.29985	8.64419	8.59451	8.98465	7.99891	10.1942	8.59231	8.35591	9.43172	9.33717	7.57888	8.15799	6.55983	8.64943	6.74714	7.5512	7.36042	8.2206	8.90802
AMPD2	0.736926	0.0258392	0.124596	8.0573	7.32037	8.52093	7.75231	7.77275	8.0837	8.28614	7.83852	8.38404	9.05604	7.32635	7.55224	7.62756	6.37101	6.80155	9.3049	7.34226	6.17227	6.88503	7.25972	7.60987	7.82956
ANAPC1	0.810199	0.000889196	0.0119608	7.46978	6.65958	7.67275	7.39222	7.86756	7.11706	6.80943	8.02626	7.66963	6.73474	7.71935	7.68883	7.14197	6.57229	6.74118	5.36134	6.47004	6.45305	6.93503	7.05254	7.00542	6.86296
ANKRD27	1.52059	0.00176985	0.0193348	8.2843	6.76372	10.174	8.4272	8.06311	7.60196	7.91842	8.634	7.9445	8.61571	8.17145	7.29267	7.08544	7.08377	7.38929	3.5701	7.41798	6.43593	6.47419	7.66725	7.47811	7.03511
ANKRD36C	0.779784	0.0121183	0.0745704	4.79003	4.01024	5.44186	4.86683	5.41852	3.43957	3.58601	5.99127	4.3228	5.43237	4.07042	5.33061	4.35583	3.95411	4.40632	3.2112	4.00091	3.94854	4.13834	3.89444	4.26585	3.9269
ANKRD46	1.14304	0.0284502	0.133202	7.52073	6.37769	7.17283	8.64585	7.33458	8.72627	6.48853	8.32706	7.37678	6.98681	7.64602	6.50255	6.27324	7.45156	7.4851	2.58389	6.49465	6.05438	7.13517	6.951	7.04092	6.30699
ANKZF1	0.725459	0.00714564	0.0520097	7.21312	6.48766	8.39727	7.3132	7.73786	7.42205	7.04189	6.90453	7.71594	6.51986	6.20433	6.87422	7.15677	6.20891	6.02058	5.8586	6.7119	6.81577	6.60203	7.02887	6.64051	5.83263
ANLN	2.23024	5.26103e-06	0.00027996	5.01276	2.78251	4.80298	6.61032	5.02219	5.11761	5.43562	5.69164	4.02151	4.39373	6.20131	2.83067	2.39247	4.05489	3.15298	2.05036	2.66548	2.64293	3.23477	2.55943	2.72876	2.34307
ANO10	0.862486	0.0037712	0.0328799	5.53804	4.67555	6.54352	4.6436	5.39063	5.32458	5.60265	5.25717	5.87697	5.09482	5.02877	6.61768	5.12042	5.02495	4.71627	3.05031	4.64061	4.6692	5.10466	4.8411	4.84518	4.74281
ANO8	0.943913	0.00159333	0.0179917	5.02633	4.08241	4.74348	4.52299	4.64802	4.7415	4.93358	5.93727	5.67891	4.73146	4.13025	6.1958	4.35583	4.12629	4.17296	5.3902	3.79603	3.74375	3.43746	4.09148	4.05274	3.65741
ANPEP	1.05141	0.0135286	0.0801983	4.30688	3.25547	4.69801	5.2206	6.59263	3.99786	3.91802	4.22287	4.47521	3.29646	3.5102	3.13694	3.03495	2.66124	2.6168	5.33662	2.85365	3.09928	2.59913	3.25646	3.51951	3.57703
ANXA3	1.30182	0.0163342	0.0912951	8.10818	6.80636	8.14602	9.49414	9.50622	7.07054	8.22802	10.2162	7.23948	6.33898	8.48548	6.35672	7.83343	8.00359	8.34459	6.0562	6.2888	6.59769	5.62298	5.46304	7.07973	6.77358
AOC1	2.11416	0.00434965	0.0365438	5.06394	2.94978	7.05825	2.81026	6.25967	7.52078	3.02147	8.56031	5.55356	3.08507	2.59421	4.17584	2.95163	3.36684	3.29948	3.63203	2.61253	2.69171	2.77411	2.86491	2.8507	2.45391
AP2M1	1.612	0.00527777	0.0420838	8.12221	6.51022	9.49414	8.51248	8.10661	8.08514	7.41897	7.4563	7.87265	7.32465	8.95028	8.00088	6.60577	7.64977	7.24838	2.03136	6.78318	7.26059	6.64209	6.92718	6.92284	7.031
AP2S1	0.59609	0.0031616	0.0291825	6.15831	5.56222	6.63059	6.4061	6.0796	7.00877	6.34395	5.89835	5.91411	5.83646	5.51049	5.95466	5.24403	5.85747	5.69404	6.34568	5.4117	5.30434	5.68605	5.58796	5.05983	5.4311
AP4M1	0.60147	0.0382507	0.162849	4.98095	4.37948	5.32916	6.0939	5.19365	3.95797	5.63136	5.54944	5.15097	4.7415	4.23203	3.92953	3.83373	4.96431	4.83819	4.27662	4.93386	4.63033	3.35892	4.48815	4.09762	4.37309
APBA2	0.817461	0.00955819	0.0635164	5.1771	4.35964	6.82002	4.03391	5.27841	5.01879	5.04359	5.24357	5.42582	5.99187	3.86015	5.05484	4.02708	4.35519	4.11748	5.33801	4.14469	4.04954	3.99231	4.36582	4.83117	4.37506
APEH	0.941941	0.00432943	0.0364034	6.51976	5.57782	6.11633	7.56013	6.34024	6.44572	6.55761	5.82764	6.50434	6.20757	7.17725	6.46077	5.13397	5.98171	6.48136	3.5701	5.31046	5.96292	5.96823	5.45361	5.47783	6.43801
APEX1	0.873594	0.000406275	0.00692544	9.57823	8.70464	9.70176	10.3268	9.74726	9.36227	9.21783	9.30668	9.3394	9.92651	9.40156	9.45219	8.53865	8.89784	8.92357	7.57977	8.45578	8.49399	9.48879	8.27446	8.83356	9.55996
APLP1	0.81006	0.00217328	0.0223705	4.35652	3.54646	5.02565	3.52883	3.99357	4.09302	4.09409	4.1008	5.91185	4.32262	3.65181	4.84292	3.64113	3.5479	3.4495	2.97476	3.82987	3.51905	3.62663	3.38482	3.59294	3.89796
APMAP	0.977977	0.00546306	0.042923	9.11332	8.13535	9.93533	8.48243	8.85768	9.38558	8.55678	8.04659	9.64848	9.65889	9.67273	8.88873	8.48049	8.77534	8.50957	5.85747	8.36261	8.21943	7.79542	8.34166	8.63602	8.37544
APOA1	1.76785	0.00214746	0.0221543	6.77503	5.00717	9.8353	5.4715	6.46105	7.8178	7.23948	7.18457	5.47406	7.17825	4.04333	7.04493	4.37625	4.98109	6.28827	5.72342	5.30135	4.20191	4.67489	4.78447	4.27586	5.46421
APOBEC3B	1.22448	0.0199325	0.104513	4.7198	3.49531	5.27913	3.96312	4.31531	4.99719	6.02251	6.49202	4.69764	2.15948	6.25296	3.01862	3.74823	3.74732	3.04211	2.08722	3.77736	3.90385	4.45472	2.84845	2.55506	4.78883
AQP5	0.839312	0.00969837	0.0640892	4.74182	3.90251	6.13943	3.98739	4.33954	5.15851	4.66425	6.55823	4.21647	4.33789	3.80561	4.2109	3.66783	3.75461	4.13003	4.48638	3.80139	4.16979	3.67458	4.14369	3.42111	3.77569
AREL1	0.616365	0.0105957	0.0675847	4.78104	4.16467	5.08686	4.76194	4.95833	4.93874	4.95159	4.39511	4.73356	4.59086	4.91466	4.47873	3.71963	4.6968	4.52549	2.51185	4.46349	4.18311	4.73634	4.61922	4.39455	3.79625
ARF3	0.960534	0.000439936	0.00737759	6.83182	5.87128	7.10706	6.04485	6.70319	6.88999	6.0211	6.5417	7.69832	7.44478	7.03051	6.83669	5.62298	6.58982	6.22505	4.65437	5.99409	6.12388	6.1118	5.94947	5.44866	5.99273
ARFGAP1	1.18403	0.00845016	0.0586502	8.59089	7.40687	10.8782	8.77341	7.26464	8.11547	8.56031	8.23041	9.55996	8.50172	7.23948	8.78529	8.08992	6.81142	6.775	9.46704	7.51912	6.93195	6.47797	7.34775	7.57229	7.07619
ARHGAP11B	1.89823	1.15958e-07	2.05917e-05	4.45567	2.55744	4.97257	5.02188	5.49164	3.74281	4.54572	4.5234	3.96901	4.64615	4.5202	3.12331	2.3498	2.7379	3.0053	1.88375	2.47375	2.31294	2.18743	2.484	3.0627	3.07679
ARL4C	1.34582	7.33892e-07	6.96162e-05	7.61279	6.26696	7.63341	7.38095	8.3953	8.00163	7.4888	7.46623	8.21195	6.72629	7.07845	7.74488	6.06201	6.31264	5.832	6.0528	6.43458	6.25557	6.31299	5.83893	6.49251	7.07561
ARMC2-AS1	1.29995	0.00283734	0.0270518	9.4764	8.17645	9.01321	9.70497	9.60248	9.48879	10.108	9.94755	9.38558	8.7915	8.86666	9.85534	7.97918	8.35697	8.62163	4.83011	8.78772	8.37718	8.634	9.01041	8.52932	8.63797
ASAP3	0.729622	0.00188743	0.0202464	5.57572	4.8461	7.2268	5.49051	5.1818	5.45879	5.27592	5.79024	5.75526	4.78026	5.47856	5.31909	4.97821	4.60114	4.81766	4.80898	4.92881	4.82655	4.57148	4.95419	4.93913	5.03485
ASB6	0.644945	0.00547592	0.0430051	6.08909	5.44414	6.72629	6.12643	5.77833	5.8066	6.12388	6.12589	6.72375	6.69126	5.38775	5.40068	5.21456	5.08096	5.07915	6.55582	5.28383	5.36731	5.09295	5.7168	5.59433	5.45569
ASCC1	0.846414	0.00249139	0.0247139	5.53218	4.68577	5.18977	5.26434	5.04684	5.74803	5.01726	6.14132	5.24269	4.81403	6.56173	6.29579	3.93958	5.38507	5.26409	4.70664	4.27694	5.0104	5.3358	4.08345	4.48988	4.36582
ASF1B	0.968247	2.2797e-05	0.000839947	5.48294	4.51469	4.95014	6.0907	5.05972	5.06546	5.58575	5.92354	5.29071	5.41992	5.6914	5.75202	4.20137	4.92729	4.35583	3.99521	4.70664	3.9584	5.12081	4.44599	5.03151	4.40385
ASL	0.982564	0.00533298	0.0423308	5.74869	4.76612	5.76309	7.64729	5.39544	5.1885	5.60818	5.5385	6.59947	4.29478	6.43914	5.0125	4.20742	5.4838	5.36134	4.0732	4.43516	4.77834	5.23996	4.62166	4.598	4.86234
ASPM	3.04463	1.01962e-07	1.9723e-05	5.54578	2.50116	5.16874	6.58861	5.86482	6.24697	5.39245	7.09226	4.53203	5.05624	6.69214	2.82359	2.80407	2.58699	2.63469	2.29369	2.26518	2.36	2.23815	2.15172	2.56582	3.11123
ASS1	1.13887	0.000606507	0.00914393	9.89439	8.75552	10.7295	11.1191	8.814	9.66033	10.3382	10.1436	10.3565	9.74307	9.30075	8.73902	9.1055	8.08992	9.03809	9.19888	8.42819	8.32817	8.51792	8.18868	9.05741	9.60248
ATAD2	2.29112	9.39177e-07	8.47859e-05	5.89586	3.60473	5.59484	7.12719	5.9058	5.1818	6.17963	7.02454	5.19072	5.27878	7.33208	4.14317	3.65701	4.29717	3.61244	3.29809	3.47112	3.00102	3.3126	3.14687	4.09443	4.15657
ATAD5	1.12742	0.00100005	0.0130189	5.6143	4.48688	6.0562	4.7378	5.31706	4.90833	5.37074	5.65766	6.91716	6.42291	4.71146	6.04374	4.60286	4.0289	4.17326	5.85794	4.09676	4.70782	3.47139	4.47213	5.0125	4.44524
ATG101	0.706436	0.000195237	0.00406955	7.0364	6.32996	7.47101	6.68114	6.73729	7.23418	7.07346	6.85064	6.9405	7.66811	7.20578	6.50188	6.05066	6.56788	6.33984	5.90254	6.15656	5.9469	6.86151	6.25882	6.49587	6.71903
ATHL1	1.82825	0.00116737	0.0144367	8.3172	6.48895	9.47098	8.52567	8.21195	5.68083	7.97125	8.61774	6.788	9.62568	8.23842	10.0415	6.72629	5.73029	5.72862	8.72252	6.34304	6.37883	5.02704	6.45859	6.76685	7.00747
ATIC	1.00087	0.000282563	0.00532678	7.41964	6.41877	7.65545	8.30936	7.33314	6.69064	7.90193	6.76737	7.71506	7.33914	6.87528	7.60907	6.31519	6.76209	6.7233	5.00748	6.48689	6.2301	6.54952	6.41044	6.87017	6.83252
ATL2	1.18058	0.00121692	0.0148693	6.1421	4.96152	6.72761	5.5031	7.30913	6.2787	5.07266	6.03688	5.71477	7.0977	6.63542	5.04503	5.42733	5.31633	5.4399	3.23351	5.39287	4.87021	5.45879	4.62222	4.77164	5.08239
ATL3	0.648879	0.000937093	0.0124824	3.87425	3.22537	4.39118	4.31629	3.5985	3.58103	4.05942	3.20495	3.82686	3.50788	4.71706	3.53928	3.27073	3.50269	3.24507	2.82939	3.64769	3.2923	3.01835	3.06198	3.12927	3.2562
ATP13A1	0.71216	0.0352469	0.153852	7.39693	6.68477	6.34697	7.38453	7.3132	7.5152	6.87301	6.9628	8.61774	7.07145	7.11917	8.76527	6.97708	7.04189	6.65219	4.69708	7.00542	6.89708	6.42499	7.21804	7.1685	6.76546
ATP5B	1.01986	0.000323779	0.00588557	9.58037	8.56051	9.53512	10.7633	9.21235	9.70176	9.25983	9.29065	9.29065	9.34648	10.3268	9.07669	8.27446	9.67717	9.14547	8.57904	8.25506	8.50101	8.26876	7.95258	7.94898	9.00255
ATP5C1	0.604064	0.00292856	0.0275603	9.146	8.54194	9.09429	9.37822	9.27142	9.16176	9.27948	9.73958	8.11234	9.30075	8.72061	9.40156	8.50243	9.29065	8.87744	7.93155	8.51792	8.54226	8.23922	8.64419	8.38822	8.48548
ATP5E	0.677181	0.0121643	0.0747494	10.2932	9.61598	9.91593	9.66451	10.2471	10.7747	11.2746	9.04894	11.3932	9.95298	9.72339	10.9362	9.37195	9.53223	9.611	9.43475	9.91593	9.80383	9.67273	9.48119	9.24953	10.0866
ATP5G1	0.71596	0.00168387	0.0186938	8.84389	8.12793	7.78085	8.17314	8.72977	9.36956	9.30668	8.74085	9.3501	8.40225	9.1668	9.41887	8.12403	8.27553	8.23922	8.46554	8.07408	7.94178	7.76593	7.64977	8.17648	8.56694
ATP5G3	1.42361	0.00032659	0.00591251	8.75029	7.32667	8.02301	10.5096	8.33599	8.66759	10.0056	8.33406	8.39011	7.65833	9.41634	8.16223	6.68332	8.16309	8.11117	6.44238	7.15677	7.62416	7.71794	6.92059	6.75255	7.69475
ATP5I	0.800955	0.000472022	0.00768906	9.91955	9.1186	10.0415	9.16913	10.4738	10.3768	11.0394	9.64576	9.7998	9.72683	9.35336	9.56911	9.16374	8.99799	9.01542	9.64341	9.5002	9.05604	8.91808	8.91026	8.88342	9.0974
ATP5J	0.764407	0.00350473	0.0313923	9.48693	8.72252	10.3989	9.38795	8.76154	9.43764	8.33881	9.61456	9.71241	8.97786	10.2069	10.0327	8.61571	9.05741	9.18043	7.84182	8.87441	9.05741	8.69228	8.51499	8.46049	8.93024
ATP6V0B	0.758431	0.0270822	0.128672	6.55862	5.80019	7.24101	8.11682	6.52815	5.85286	6.31264	7.22585	6.72171	4.94689	7.03316	5.60709	5.71822	6.4029	6.30733	4.80489	5.69164	6.11037	6.10366	4.98785	6.09645	5.77856
ATP6V0E2	1.07041	0.00237188	0.0238744	6.89465	5.82424	7.66888	6.46776	5.98289	8.45425	7.87658	6.66446	7.01135	6.03059	6.40699	6.38272	4.69801	6.51921	6.49524	5.18782	6.14132	6.03375	5.4546	6.16713	5.40809	6.13724
ATP6V1B1	0.765102	0.00095959	0.0126747	3.87504	3.10994	4.99247	3.64399	3.648	3.70101	3.19194	4.34612	4.095	3.89069	2.85192	4.38927	3.06645	3.07493	3.37887	3.14068	2.90021	2.93988	3.02622	2.90148	3.40149	3.26918
ATP6V1C2	1.14333	0.0314647	0.142299	4.73643	3.5931	6.88561	4.50124	4.68972	4.18311	3.43011	6.83669	3.74993	6.8206	3.05693	3.21039	2.99277	4.21606	4.61279	2.58746	3.14848	4.00604	3.60517	4.15196	3.18131	3.42899
ATP7B	1.15261	0.00523733	0.0419458	6.27911	5.1265	7.86496	5.30338	6.12346	7.79946	4.92634	5.51312	7.29112	5.35613	6.79906	5.81411	5.54667	5.84592	5.19795	3.68983	5.33439	5.69207	4.94746	4.80898	5.20198	4.9998
ATRIP	0.709166	0.00190211	0.0203482	5.26494	4.55577	5.52189	5.84839	5.0125	4.83352	5.84096	5.23797	4.80235	5.39197	4.75414	5.4057	4.72806	4.70518	4.82389	3.33038	5.25273	4.60774	4.44977	4.81381	4.55484	4.29133
ATRN	0.745205	0.000537231	0.00838646	5.38693	4.64172	5.06102	5.89492	5.1278	5.4174	5.30582	4.87509	5.59821	5.11787	6.24185	5.22929	4.21365	5.08197	5.07	3.84576	4.5965	4.66466	4.53711	4.48613	4.77871	5.14274
AUNIP	1.3783	1.06922e-07	2.01791e-05	5.20798	3.82967	4.54852	5.15427	5.06459	5.18388	5.47625	6.03215	5.54248	5.06009	5.03111	4.98641	3.82464	3.73107	3.15722	4.59532	4.14701	3.7681	3.447	4.05452	3.73236	3.83949
AUP1	1.35862	0.000267351	0.0051159	8.29336	6.93474	9.99938	8.33116	7.9445	8.49112	7.06809	8.26148	8.56694	8.96377	7.04444	8.26269	7.52734	6.65748	7.04257	5.48505	7.47642	7.10156	6.85064	6.98823	6.93503	7.28306
AURKA	2.54551	1.90559e-11	3.76799e-08	6.25336	3.70785	5.8586	6.21322	6.00109	6.87017	7.00324	6.24794	6.71375	6.1481	6.29405	5.18343	3.64579	4.15914	4.07245	3.00694	3.98972	3.3843	3.55261	3.77054	3.59687	3.90019
AURKAIP1	1.09859	2.45656e-05	0.000890366	7.97256	6.87397	8.58251	8.22915	7.67578	8.64585	7.85815	7.8703	8.41884	7.89626	7.20962	7.33914	6.93813	6.84472	7.05926	6.28647	6.82002	6.94485	7.81022	6.60654	6.29368	7.13585
AURKB	0.613668	0.0455286	0.182401	4.22877	3.6151	4.71103	5.52639	3.84974	4.21675	4.61279	4.43207	3.64829	3.47778	4.38255	3.43034	3.1675	3.97708	3.59026	5.35991	3.14146	3.14223	3.86606	2.86233	3.47426	3.56995
B3GALT6	0.887213	0.000568325	0.00869639	8.23621	7.34899	7.66963	7.99439	8.48049	8.42941	8.01625	9.53512	7.79013	8.13572	7.68582	8.6251	7.9055	7.2109	6.79566	6.93646	7.00824	7.4941	7.5679	6.96015	7.53262	8.07838
B3GNT2	0.674022	0.0333123	0.147616	5.38321	4.70919	5.45737	5.46421	5.30677	5.22013	4.98388	5.36693	4.58022	5.26965	6.2474	5.93558	4.4781	5.30996	5.60033	2.42767	4.55855	5.12979	5.07061	4.73203	4.85455	4.9303
B4GALT3	0.900605	0.000188546	0.00396466	6.68655	5.78594	6.82867	6.83741	6.86151	6.2861	6.97562	6.58582	6.81896	6.24112	6.44153	6.98874	5.93689	6.03175	6.33984	4.36698	5.9755	5.8513	5.52834	5.3902	6.219	6.21963
B4GALT5	0.757013	0.00158828	0.0179574	8.39213	7.63512	7.98425	7.97793	8.49944	8.07674	7.56382	8.80334	8.92357	8.83356	9.02312	8.23553	7.89256	7.47166	7.56495	7.78593	6.74714	8.20514	7.24101	7.29267	7.923	8.22711
BABAM1	1.51027	5.50546e-08	1.37993e-05	7.7922	6.28193	7.95258	7.60456	7.50076	7.81493	7.40502	7.56652	7.82778	8.90802	7.41648	7.92532	5.98483	6.01896	6.16071	5.74336	7.01383	6.21762	6.72068	6.07698	6.24343	6.6389
BAK1	1.05026	7.19103e-05	0.00194081	5.09746	4.0472	6.2775	5.88574	4.62166	4.5097	5.31118	4.76163	4.67517	4.58904	4.86206	5.48093	3.42744	4.36178	4.06673	4.31248	3.6751	3.85534	4.21878	3.98617	4.48149	4.08672
BARD1	1.31112	0.00181153	0.0196573	7.00028	5.68916	6.87251	6.65579	7.14552	6.31669	8.57698	6.69599	6.50362	7.64885	7.29653	6.29034	6.64051	5.63641	5.14119	3.28011	6.59947	5.15789	5.69563	6.24277	5.98596	6.51168
BCAP31	1.045	0.000961496	0.0126747	8.27551	7.23051	7.80473	9.88683	8.30631	8.83964	7.76162	9.09099	8.05399	7.58334	7.69954	7.7281	7.4353	7.89626	7.69164	6.24185	7.19023	7.6505	6.88652	7.19622	6.86972	7.24686
BCL7C	0.952162	0.00054326	0.00845092	6.27788	5.32571	6.31351	7.11513	6.08742	6.75345	6.79187	6.45094	6.03215	5.22541	5.44676	6.56211	5.27006	4.8107	5.35728	5.97801	5.84754	4.92236	5.21097	5.37074	4.56334	5.92615
BCS1L	0.811541	0.00832872	0.0581019	7.05728	6.24573	6.46776	6.87139	7.39107	5.82806	7.49382	6.95383	7.71251	7.18682	6.63461	8.03288	6.4175	6.33936	6.12093	4.58421	6.72095	6.36482	5.83893	6.55099	6.94389	6.57577
BDNF	0.643223	3.30409e-05	0.00110734	2.83789	2.19467	3.38492	2.90751	2.65897	2.6857	2.82197	2.60284	3.05154	3.01323	2.43279	2.81947	2.42506	2.09306	1.98332	2.21361	1.96825	1.8822	2.02114	2.51612	2.49698	2.34693
BGN	1.05029	0.00159313	0.0179917	5.89627	4.84598	7.02887	5.32353	5.43711	7.28081	5.07686	5.81249	5.7848	6.03466	5.8163	5.36731	4.86097	4.33924	4.55402	6.04599	4.23203	4.75092	4.3086	4.63709	5.90214	4.82883
BIRC5	1.51886	4.43111e-07	4.9939e-05	4.99506	3.47619	4.95772	5.05588	4.44037	6.16221	5.68259	5.17627	4.55855	4.73294	5.16082	4.02321	3.20375	3.85982	3.36625	3.32782	3.50208	3.56298	4.01206	3.03558	3.23979	3.65181
BLM	1.83095	2.54198e-07	3.48264e-05	6.12416	4.29321	6.79844	6.65219	6.34697	5.6268	6.76316	6.36581	5.94499	5.5389	5.05624	6.1481	4.33496	5.10421	4.01392	3.5701	4.51104	4.14255	5.00284	3.96406	4.80528	3.48317
BMP7	0.790554	0.0132122	0.0789009	5.40623	4.61568	5.46349	4.08195	4.44304	5.91934	6.38209	4.60084	6.57849	5.46136	5.37694	5.75476	4.64235	4.80528	4.78482	5.82997	4.87093	4.1465	4.20594	4.09585	4.19379	4.58132
BNIP3	1.52816	0.000668448	0.00977462	7.18558	5.65742	6.56735	8.19759	6.83188	8.84729	7.98124	6.95702	6.08953	5.91099	8.40432	6.06859	5.74405	6.44671	6.19144	4.09273	5.76625	5.99273	6.35384	5.49242	5.32353	5.17046
BOLA1	0.975072	0.00024814	0.00484731	5.17356	4.19849	5.21793	5.75114	4.68373	5.44469	5.44452	5.44092	4.49847	4.55968	5.56418	5.13035	3.45101	4.51161	4.52589	3.00039	4.4213	4.70987	4.60881	4.31325	4.56214	3.88063
BOP1	1.27472	5.32822e-06	0.000281368	5.70055	4.42583	6.07608	6.84627	5.74295	5.63723	5.46421	5.59582	5.53089	4.68749	5.54067	5.88391	4.50361	4.23771	3.90872	5.48305	4.06018	4.34792	4.43586	4.3562	4.40584	4.51925
BORA	1.50458	0.00189407	0.0202931	5.30639	3.80181	8.36873	5.3678	5.2178	5.20932	3.76383	5.01879	6.62276	4.38373	5.32799	3.78309	3.40004	3.78152	4.37361	3.2145	3.33681	4.10663	4.10127	4.26907	3.52549	3.90915
BPGM	0.994403	0.025649	0.124069	4.82801	3.8336	4.67674	5.61198	4.97948	6.40338	3.9246	6.07113	3.707	2.9277	6.29962	3.67843	3.37559	5.17766	4.18265	2.72784	4.08345	3.92505	3.70831	3.49539	3.67816	3.98194
BRAP	0.791379	0.0025174	0.0248632	5.2959	4.50452	6.04528	5.6926	5.23797	5.42442	5.50946	4.44037	5.60962	5.04715	5.09036	4.86177	3.72757	5.10133	4.81608	3.29896	4.15435	4.8665	4.57673	5.09295	4.85377	4.55695
BRCA2	0.589186	0.000237067	0.0046824	2.75629	2.1671	2.35195	2.864	2.83472	2.99277	2.9134	2.58607	3.61969	2.40068	2.60211	2.39751	2.12659	2.21612	2.2581	2.04164	1.99675	2.16025	2.10922	2.07225	2.3732	2.31691
BRD9	0.706999	0.000464449	0.00762484	8.2556	7.5486	7.62142	7.84997	8.37858	8.61774	7.78882	8.31343	8.93401	8.73768	7.68522	8.62909	7.47895	7.12371	7.21804	7.94178	7.45927	7.67997	7.49307	7.72632	7.67446	7.6904
BRICD5	0.756859	0.00142216	0.0166505	4.45902	3.70216	4.62453	4.62903	4.1582	3.94069	5.41424	4.83952	3.81409	4.74752	3.94788	4.47452	3.7289	3.59236	3.16089	4.81118	3.8332	3.37678	3.52953	3.89874	3.45101	3.63905
BST2	2.24966	1.8094e-07	2.80001e-05	9.22894	6.97927	10.3691	9.22195	9.19713	9.42538	9.88228	8.35697	9.11703	9.66451	8.45501	8.59998	7.28824	7.66963	6.39376	6.82713	8.10581	5.76768	6.15327	6.74714	7.15485	7.68522
BUB1	0.834402	7.68762e-06	0.000372776	3.44141	2.60701	3.06079	3.81409	3.6008	3.97588	3.4916	3.28737	3.46839	3.23938	3.73187	2.7439	2.46174	2.80774	2.6846	2.99652	2.65694	2.3308	2.60422	2.57423	2.72682	2.22645
BUB1B	3.40346	9.03393e-08	1.86939e-05	8.31543	4.91197	9.13579	9.45507	8.75936	9.01803	7.83711	8.05901	7.62416	8.52417	8.24841	6.4932	3.83949	6.10516	4.34559	3.00951	5.56398	3.81377	6.50255	4.74325	5.32916	5.86723
BZW2	0.685906	0.0357188	0.155302	9.03478	8.34887	8.17988	9.245	9.23504	10.1436	8.35355	8.5467	9.70773	8.53865	8.32427	10.0734	8.30146	7.92819	8.28963	9.80383	7.97918	7.34916	8.34055	7.76916	8.91916	8.80843
C10orf2	1.22506	1.81449e-05	0.000712819	7.62116	6.3961	7.30768	7.86112	7.99714	7.64885	7.88683	6.99825	7.28402	8.33599	7.10888	7.78281	6.2285	7.02454	6.34741	5.73065	6.95353	6.00516	5.65141	6.25927	7.47021	6.29034
C11orf48	0.699112	0.00348223	0.0312611	7.58134	6.88223	7.87658	7.85466	7.48679	7.1724	8.2603	7.56105	7.87372	7.23418	6.5186	7.97514	6.7003	6.67973	6.9658	5.70229	7.32465	7.15677	7.01065	7.37173	6.97844	6.93195
C11orf73	0.968358	0.00789003	0.0557602	3.64452	2.67617	4.97103	5.74896	3.40101	3.54234	3.01909	3.40322	2.85271	2.62974	4.3523	2.52485	2.55943	2.61822	2.9757	2.53306	2.56091	2.17468	2.93127	3.06808	2.35049	2.98982
C11orf80	0.713941	0.00459663	0.0380493	4.82936	4.11541	4.88692	5.93956	4.5188	3.65658	4.9525	4.929	5.1983	4.81958	4.31413	5.07819	4.47658	3.81127	3.72914	4.07071	3.85733	4.86807	3.56298	4.27554	3.85824	4.64428
C12orf10	0.650775	0.0220857	0.112393	5.79932	5.14854	6.8168	5.6665	5.67554	5.19626	5.42992	4.95419	6.61106	6.52547	5.06546	6.05196	5.96589	5.19971	5.57245	4.16125	5.25564	5.48984	4.42684	5.23971	4.72274	5.45134
C14orf169	0.785239	0.0121794	0.0747608	5.46075	4.67551	5.25764	5.94645	5.67768	5.82846	6.05935	5.19662	5.02437	4.99366	5.04911	5.57418	4.69088	5.28894	5.41619	2.37306	4.48183	4.5853	5.02128	4.99686	5.03604	4.86474
C14orf2	0.8563	0.00103428	0.0132992	8.13096	7.27466	8.20266	7.24686	8.21617	9.26853	7.81022	8.58455	8.73255	7.16813	7.88857	8.19141	7.14677	7.6344	7.67275	6.53835	7.13871	7.36338	7.73013	7.15392	7.09689	7.27135
C15orf39	0.609797	0.00679986	0.0500456	5.6554	5.0456	5.35533	5.74661	6.28293	5.30616	5.89964	5.44396	6.29536	5.21425	4.71475	6.29498	5.07517	4.89174	5.24744	5.83215	4.55238	4.9751	5.22977	4.75874	4.61676	5.27677
C16orf59	1.26963	3.93753e-07	4.76601e-05	6.03073	4.7611	5.86763	6.05348	6.38842	6.34221	6.59661	5.63959	5.78445	6.28463	5.77608	5.57418	5.14522	5.08373	4.97257	5.30616	4.70724	4.73701	3.87866	4.22013	4.74566	4.81464
C19orf12	0.901734	0.00768143	0.0546795	7.78339	6.88165	7.00439	6.5458	7.59602	8.19924	7.98234	8.36438	8.44928	8.15658	8.25753	7.27831	7.253	6.83475	7.24398	4.81381	6.8604	6.69823	6.98681	7.09985	7.26126	7.76444
C19orf43	0.630648	0.0246861	0.121223	8.67945	8.04881	8.29096	9.7704	8.24581	8.36873	8.66608	9.08032	9.27142	7.39556	8.08658	9.6187	8.15799	7.72548	8.21066	8.79308	7.37484	8.11234	7.62082	7.76593	8.21195	8.51499
C19orf53	1.15199	5.03227e-05	0.00151019	7.75827	6.60628	8.51499	8.12926	7.77591	7.49711	7.32223	7.95635	7.74488	7.14128	7.32223	8.17848	6.72042	6.42987	6.54097	5.32051	7.17576	7.14677	5.9503	7.11094	6.60974	7.05753
C19orf54	0.811799	0.0107344	0.0682732	7.73771	6.92591	8.37544	6.49555	8.03573	8.08658	7.84793	6.37728	7.96649	9.36956	7.02409	7.79847	7.21641	6.88098	6.76127	6.1118	7.02887	7.36164	6.96515	7.05549	6.69928	7.17825
C1orf106	1.25755	0.000400173	0.00685416	8.9899	7.73235	9.21559	8.37272	9.55996	9.89183	8.904	9.96606	8.88342	7.43357	8.23099	9.44082	8.02301	7.23418	8.31212	7.88062	7.43203	7.97793	8.65422	6.88813	6.90135	8.01991
C1orf109	1.30156	0.00147198	0.0170321	6.63978	5.33822	6.30989	6.514	6.9519	6.06041	6.20131	7.13023	5.55895	8.26992	7.15616	6.24501	4.44209	5.9339	5.68341	3.0592	5.87815	5.74003	5.64431	5.61794	6.01534	5.3678
C1orf116	1.16062	0.00257065	0.0251774	4.52413	3.36352	4.81272	5.55549	5.53786	4.12516	5.48068	5.73065	3.38259	2.78191	3.34164	4.49261	3.2225	3.18701	3.52691	2.66773	3.73959	3.42641	3.92259	3.58601	3.25372	3.1027
C1orf186	1.76514	0.0018596	0.020081	9.65302	7.88788	10.8508	9.52786	9.47098	8.26269	10.1942	8.57393	11.133	10.1679	7.47895	10.8699	9.80383	7.58693	8.36261	8.0665	9.02126	6.97097	7.27073	7.00031	6.00109	8.79458
C1orf216	1.53311	2.26947e-05	0.000837916	7.35969	5.82658	7.93756	6.81413	7.63208	6.90135	7.67681	6.54292	6.48277	9.20643	7.51779	6.88503	5.70359	6.75037	5.41619	6.24388	5.59821	5.25201	5.50575	6.11539	5.69045	5.98995
C1orf50	0.75385	0.0145632	0.084535	5.68765	4.9338	5.64038	5.4455	5.90125	5.79923	5.70443	6.68639	5.42527	5.1872	5.9317	5.15517	4.49962	5.146	5.27086	2.75567	4.89056	5.65692	5.41951	5.32353	5.0424	5.33295
C1orf53	0.750177	0.00204591	0.021417	4.46387	3.71369	3.936	4.43493	4.64557	4.76623	4.32761	4.23642	4.25968	4.30492	4.38969	5.33767	2.96752	4.22414	4.16659	2.77209	3.46891	4.00285	4.63793	3.70199	3.38037	3.81457
C1orf85	1.34994	4.45918e-05	0.00137531	5.2951	3.94515	6.82414	5.13355	5.19029	6.356	5.75154	5.25743	4.81926	4.64501	4.7257	4.24806	3.43864	3.89839	4.42072	3.44249	4.28	3.89839	4.30956	3.99983	3.74009	4.02344
C1QTNF9B-AS1	0.585888	0.0253209	0.123253	3.96117	3.37528	3.70555	4.02408	4.46929	5.29456	3.00138	3.83607	4.36825	2.82551	3.63725	4.44977	3.3316	3.91517	3.86985	3.27118	3.33535	3.22716	2.77944	3.33389	3.35265	3.33655
C20orf24	1.50839	2.55399e-06	0.000169593	8.93087	7.42248	9.26614	9.59149	8.95028	9.54597	8.47327	8.82908	8.54226	8.85768	9.0974	8.15516	7.44021	7.82017	7.83066	5.9103	7.27831	7.18159	8.19647	7.3056	7.41232	7.8492
C21orf91	0.885039	0.00741745	0.05342	4.67382	3.78878	5.49401	3.91902	3.15387	4.68602	4.96961	4.43769	5.09786	4.58843	5.50268	4.88902	4.1128	3.32457	4.20686	3.18467	4.68713	3.82014	4.52741	3.60298	2.38552	4.03572
C2orf47	0.604376	0.0197149	0.103801	6.43698	5.83261	5.88193	6.79844	6.88039	6.57469	7.32368	5.88044	6.00252	5.75114	6.74629	6.53031	5.14471	6.50398	6.70172	5.14233	5.2449	6.17682	6.15069	5.45231	6.20956	5.59906
C6orf48	0.602817	0.0180446	0.0976649	8.96026	8.35744	8.79707	9.20024	8.78151	7.98234	8.19141	8.50472	9.67717	9.40873	9.19713	9.86227	8.17705	9.03332	8.45425	7.57559	7.84537	8.20803	8.58455	8.10116	8.76154	8.83356
C7orf13	0.860522	0.000250494	0.00487269	5.81405	4.95352	5.87272	5.74042	6.09247	4.98109	6.16221	6.49639	5.90445	6.12749	5.03514	5.72809	5.50672	4.8894	5.34383	5.00811	5.3465	4.74372	5.27759	4.42532	4.36967	4.62439
C8orf33	1.25726	0.00596609	0.0457414	5.28394	4.02668	5.22883	7.71506	5.4428	4.35488	4.9823	5.61867	4.84687	3.70278	6.76209	4.1851	3.55118	4.9089	4.74693	2.56945	4.22703	4.43461	4.11248	4.26692	3.81326	3.63605
C8orf59	1.03032	0.0010427	0.0133784	6.20139	5.17107	5.99488	6.00814	5.80263	6.3262	6.539	5.57823	6.96015	6.22954	5.8493	6.72583	4.79781	5.19901	4.92236	4.333	6.57166	5.79453	3.92317	5.45569	5.88333	4.83011
CACNA2D2	1.46513	0.0114011	0.071191	6.89672	5.43159	6.7268	4.39086	6.5668	8.09223	5.74778	6.92891	9.35609	8.12403	5.41687	7.6168	4.93721	5.03989	4.58452	8.1316	5.18699	4.92993	4.94997	5.54435	5.88504	5.12635
CACNA2D3	1.39921	0.0154275	0.0878555	5.58307	4.18386	6.35437	3.51951	6.85918	4.09115	5.63613	7.92819	4.32085	5.04573	7.95521	4.12039	4.40462	5.09082	4.43384	2.88603	5.04115	3.38163	3.69008	4.13751	3.76718	5.00571
CAD	0.710052	0.000853983	0.0116278	4.85959	4.14953	5.49242	4.50166	4.82443	4.78026	4.70899	4.68026	5.20083	4.93721	4.49015	4.97966	4.04713	3.75788	4.34043	5.48712	3.86985	4.02628	3.9665	3.85982	4.09699	4.04333
CADPS	0.778363	0.00377478	0.0328799	3.19485	2.41649	5.2359	3.50831	2.90852	2.69404	3.08531	3.08233	2.76043	3.10775	3.12577	2.44013	2.52485	2.32511	2.5541	2.29722	2.38552	2.44934	2.31074	2.2231	2.44153	2.65335
CAMSAP2	0.693527	0.00674534	0.049742	6.24887	5.55534	6.40553	5.86298	6.15615	6.36199	5.59372	7.14886	5.90349	6.70918	6.0811	6.26566	5.9339	5.67308	5.73393	4.0103	5.68997	5.13899	5.50981	5.72776	6.1958	5.93986
CAMTA1	1.58482	0.00108315	0.0137488	5.62836	4.04355	6.85409	5.5272	6.86083	4.58904	4.22414	4.86384	6.22208	6.73058	5.47826	4.93358	5.84798	3.38259	4.10877	3.68585	4.38771	3.67129	2.63635	2.87517	4.65195	5.18782
CAPG	0.879985	0.00145283	0.0168433	6.41208	5.5321	7.61495	6.67661	6.00346	6.24365	5.80219	6.19755	6.38456	5.91934	6.0357	7.24282	5.23499	5.24523	6.12239	5.66722	5.65039	5.04253	5.19876	5.3506	5.13107	6.67781
CAPRIN2	0.706095	0.00635824	0.0476828	6.58606	5.87996	6.86426	6.04837	6.55282	6.1338	6.03688	6.57229	7.14964	8.01991	5.96589	6.51669	6.32146	5.64516	5.77214	5.21806	5.78663	5.58463	5.52548	6.55935	6.33509	6.0516
CARM1	0.67099	0.0387066	0.164028	6.1065	5.43551	6.14682	6.51669	5.90855	6.19393	6.81474	5.67856	7.08705	5.40289	4.28749	7.02823	5.38873	5.35991	5.65618	4.095	5.8396	5.65998	5.75754	5.84235	5.82002	4.93575
CASC10	0.934692	7.64885e-05	0.00203162	5.46034	4.52565	6.01111	4.39173	5.60054	5.54725	5.17166	5.7159	5.65285	6.27966	4.63834	5.59433	4.26482	4.50809	4.72596	4.50039	4.52206	4.65391	4.13297	4.75214	4.4821	4.71404
CBFA2T2	0.656891	0.000798609	0.0111032	4.97152	4.31463	5.07819	4.75024	4.73399	4.50002	5.6843	4.67674	5.36853	4.9488	4.74228	5.23214	4.49599	4.28466	4.41348	3.29009	4.66386	4.42322	4.21943	4.50624	4.53711	4.31226
CBS	1.41843	0.00198172	0.0210046	6.05238	4.63395	6.22369	7.19913	4.20842	4.68784	6.62518	5.47458	6.48925	5.9839	7.09985	6.53195	5.84409	3.96715	4.32703	5.90214	4.51428	3.4759	3.96532	3.64618	5.03019	5.66722
CBX1	0.779631	0.0382363	0.162827	8.16817	7.38854	9.12238	8.83517	7.24282	8.37718	8.22265	7.34916	8.25388	8.21337	9.45219	6.61287	7.38345	8.23303	8.04799	5.53692	6.70806	7.42773	7.20367	7.68883	7.81656	7.83911
CBX3	0.630794	0.00098818	0.0128738	8.79018	8.15939	8.62909	8.87182	8.99661	9.77934	8.68537	8.26709	8.62325	8.71925	8.54226	8.78772	8.05901	8.17482	8.0929	7.37484	8.43651	7.95846	8.48811	8.15799	8.47404	8.37718
CCDC3	2.20135	4.79998e-07	5.24052e-05	8.01934	5.81799	8.68537	9.05604	8.12685	8.01156	8.37026	6.82487	8.76332	7.91216	6.64051	7.80244	6.42931	5.36661	5.91368	5.28542	5.31046	6.04302	4.60602	6.0796	6.514	6.63177
CCDC51	0.619032	0.0278876	0.131328	6.95567	6.33663	6.64166	7.04657	7.36943	6.71717	6.90663	7.25841	6.38634	6.43291	8.05901	6.73852	5.74715	6.75782	6.56424	8.10321	6.16536	6.07163	6.35864	5.82806	5.84409	5.92615
CCDC6	0.998931	0.0119257	0.0735887	6.76535	5.76642	5.55778	6.0488	6.80086	7.35004	8.21734	6.77128	7.07845	6.13496	5.88283	7.81116	6.15959	5.82403	6.33984	3.45803	5.56347	5.96547	6.15454	5.70745	6.35046	6.14132
CCDC86	0.91095	0.000176579	0.00378084	5.95334	5.04239	5.64305	6.45305	5.9503	6.0211	6.07394	6.28349	6.57577	4.90396	5.50981	6.1189	5.09731	5.13293	4.92826	5.44779	4.74802	5.06497	5.35613	4.4607	4.43173	5.75605
CCDC88C	0.629887	0.0026962	0.0260912	3.27216	2.64227	4.07354	3.29695	3.11618	3.31353	3.3607	2.97639	4.13688	2.33031	3.2879	2.82918	2.62598	2.95701	2.80793	2.2504	2.3102	2.58358	2.96778	2.86904	2.55393	2.49686
CCL28	1.14191	0.0487204	0.190967	3.92836	2.78645	2.47031	3.063	2.87866	2.42297	2.545	2.92894	5.17134	4.36085	7.75172	5.69086	2.87178	2.39814	2.74954	1.95027	3.36199	3.39478	2.48119	2.6377	2.64995	3.36917
CCNA2	0.993348	0.00178463	0.0194603	4.45706	3.46371	4.38113	5.56482	3.89934	4.91466	5.45997	4.03156	4.62264	4.15057	4.67534	2.87054	3.48603	3.73023	3.46928	2.17927	3.66727	3.58414	3.43724	3.87463	3.72091	3.4881
CCNB1	2.72113	1.54278e-06	0.000118854	7.26682	4.54569	6.83616	8.40149	6.74894	8.12403	7.03463	7.58545	7.5808	5.65998	8.63219	6.0645	3.11221	5.86201	5.25597	2.98641	4.75591	4.34251	5.20814	4.44599	3.94336	5.54435
CCNB1IP1	0.807826	0.00352641	0.031485	8.37928	7.57145	7.5698	8.26148	8.1316	8.30365	7.44987	9.05399	9.06562	8.83099	7.81913	9.30668	7.96103	7.77509	7.57888	7.11322	7.66111	7.02056	6.93754	7.27135	8.16144	8.23431
CCNB2	3.02969	5.42842e-09	2.54222e-06	7.6143	4.58461	6.81896	7.94679	7.61408	9.13579	8.305	7.80909	6.93737	7.39645	7.81022	6.36922	3.64887	5.90527	5.03514	4.23473	4.59827	4.70047	4.63162	3.68777	4.04976	5.35418
CCNE1	3.02825	6.64258e-08	1.59745e-05	7.53053	4.50228	8.09223	8.20266	6.89191	7.95735	7.74328	7.40502	8.16065	6.10269	9.16374	5.58575	4.13093	4.11916	4.64929	6.0939	3.86606	3.94729	4.70204	4.34427	4.32431	4.84552
CCNE2	0.656973	0.00166952	0.0185924	3.33827	2.6813	3.27845	4.44732	2.85289	3.30913	3.53863	3.05219	2.91578	2.95025	3.94201	3.09609	2.53216	2.83169	3.07588	2.2375	2.93689	2.61496	2.35032	2.49593	2.7321	3.00556
CCNL2	0.658049	0.0312966	0.141924	9.37469	8.71665	10.0866	9.611	8.79886	8.26876	8.70293	10.1679	9.82113	10.3486	8.28366	9.65745	9.35336	8.00088	8.06907	8.85768	9.04106	8.68226	8.03527	9.11957	9.32503	8.68226
CCS	1.20048	0.000417912	0.00708302	7.1172	5.91672	8.33755	7.93572	7.14339	6.65801	7.39006	6.53372	6.69126	7.44987	5.90748	7.12498	6.87084	6.01395	6.00559	4.81926	6.17454	5.62127	5.00384	6.27811	6.52718	5.85263
CCT3	0.97614	0.000213474	0.00434903	9.33583	8.35969	10.4504	10.3184	9.66451	9.1741	9.35336	8.48811	8.95221	9.45834	8.68909	8.80985	8.80172	8.54846	8.38159	7.91654	8.48548	8.07214	8.10406	8.42221	8.27446	8.59029
CCT5	0.686919	0.0349473	0.152919	7.82619	7.13927	7.33812	9.74726	7.71082	8.2658	7.26745	7.08705	7.29721	7.74405	8.92821	6.87596	6.80029	7.98814	7.60001	7.20704	6.62588	7.19519	7.30146	7.30703	6.89537	6.4723
CD320	0.864338	0.000216544	0.00438908	6.06774	5.2034	6.33385	6.66724	5.80219	5.88193	6.80086	5.80263	6.61032	5.17509	5.6914	5.91185	5.26808	5.14984	5.05655	5.89384	5.68003	4.84443	5.16741	4.91895	4.79817	5.2567
CD47	1.0799	0.000229636	0.00459169	7.84324	6.76334	8.53865	7.83911	8.38048	7.75841	8.00806	8.21863	6.33182	7.73455	7.50827	8.11442	6.99091	7.16041	6.72995	5.43683	6.92059	7.14002	7.00542	6.46139	6.99722	6.79066
CDC123	1.0863	0.00167378	0.0186282	7.8513	6.76501	9.1741	8.47905	8.11941	7.66111	7.60611	6.82973	7.20962	7.93363	7.46623	8.03406	7.43295	7.46778	6.98078	4.85953	6.35437	7.09454	7.14964	6.65148	6.6705	6.98849
CDC20	3.39793	2.74734e-06	0.000176945	7.96313	4.5652	9.59149	9.06939	8.19031	8.45066	8.9212	7.98124	7.95846	6.77304	8.71817	3.97736	3.28621	6.22505	4.62024	4.76639	3.98097	3.98697	5.32298	3.78583	4.95953	4.71786
CDC25A	0.889808	2.31369e-06	0.000157756	4.27547	3.38566	4.1058	4.83169	4.1046	4.2426	4.723	3.97957	3.8868	4.46929	4.55547	3.85588	3.11517	3.46584	3.41141	3.85054	3.62944	3.38086	3.19755	3.10025	3.46201	3.24355
CDC25B	1.10753	0.000717131	0.0102754	7.07774	5.97021	7.33406	7.40739	6.43801	7.78593	6.86459	6.53712	8.20445	6.19215	7.79406	6.21963	6.07767	5.06497	5.24911	7.0542	6.47674	5.87644	6.08673	5.74203	6.31818	5.75605
CDC25C	0.654191	1.22086e-05	0.000528622	3.43849	2.7843	3.49412	3.75393	3.30003	3.4899	3.4326	3.52453	3.5612	3.27822	3.57593	2.97447	2.64149	2.7811	2.9587	3.36098	2.73583	2.4866	2.62147	2.545	2.90394	2.80793
CDC45	1.04356	0.00110131	0.0138704	4.7087	3.66515	5.3359	6.01839	4.32452	4.29428	5.31633	4.32703	4.77338	3.44498	4.89667	4.35554	3.61171	3.83403	3.72315	4.12576	2.90241	2.92688	4.65756	3.91231	3.89664	3.06101
CDC6	0.677028	0.00185048	0.0199946	3.20911	2.53208	3.37149	4.26959	2.69014	3.59601	3.40593	2.97371	3.19794	2.97783	3.12472	2.48371	2.44934	2.89543	2.79324	2.63704	3.14974	2.49784	2.27321	2.48636	1.97236	2.16622
CDC7	2.15999	0.000250889	0.00487426	6.38187	4.22189	7.19477	7.74488	6.23336	7.27831	6.68926	5.77727	5.66159	6.81934	7.05926	3.3607	3.56029	5.90157	3.67235	1.95633	4.31985	3.95496	4.6675	4.83914	5.32123	4.02565
CDCA3	2.03164	3.16901e-10	3.31739e-07	6.27175	4.24011	6.08673	6.17559	5.92836	6.37158	6.64616	6.2052	6.38599	7.26059	6.26175	5.39557	4.44251	4.89955	4.21247	3.81776	4.03802	4.06018	4.05652	3.90915	4.37681	4.5881
CDCA4	1.23683	2.68596e-05	0.000946522	6.63801	5.40118	7.20578	6.64209	7.07213	6.68805	6.29936	7.15558	6.80836	5.95986	6.19807	6.35084	4.67517	5.67856	5.85987	6.26659	4.62222	4.89989	6.0516	4.71372	5.39831	5.84592
CDCA8	1.90522	3.33957e-07	4.29073e-05	6.72687	4.82165	7.5679	7.22385	6.92891	6.20757	6.45094	7.33753	5.79584	7.30332	7.28628	5.16656	4.32629	5.28212	4.80867	5.20049	4.56112	4.44557	4.73271	5.01988	5.14471	4.69493
CDH18	1.32839	0.00753461	0.0538282	4.67601	3.34762	5.25434	2.9673	2.91725	3.32444	5.6694	4.27942	6.36416	4.59975	5.78315	5.60091	3.47005	2.76261	3.40651	5.52775	2.85633	3.2183	3.45685	2.60099	2.69831	3.4785
CDH6	1.87161	6.23922e-07	6.16851e-05	5.71325	3.84165	4.93757	5.70654	5.09116	6.24648	6.47419	4.80605	7.31661	5.00196	6.28827	5.26371	3.85509	4.34218	3.99196	4.15027	3.88114	3.79202	3.49672	3.41535	3.71652	3.7752
CDIPT	0.808404	1.20305e-05	0.000523458	10.8027	9.99431	11.2458	9.97143	10.9814	10.9814	10.6473	10.8544	10.7633	10.5378	11.315	10.7295	10.0734	9.9098	10.1868	9.96042	9.92651	9.89769	9.71851	9.71241	10.297	10.2606
CDK1	2.38118	7.81719e-06	0.000377004	6.32327	3.94209	5.13974	6.56495	6.69279	7.33093	6.54352	7.21514	5.28542	6.90663	7.6505	3.9031	3.53928	5.47718	4.24147	2.95366	3.42316	4.03187	4.04976	3.5894	3.78778	4.32737
CDK16	0.667596	0.00024505	0.00480806	5.70365	5.03605	6.42048	5.51421	5.52032	6.03626	5.89066	5.2523	5.67268	5.54435	5.62974	5.55549	5.15368	4.89246	5.01988	5.82764	4.97145	4.94601	4.51925	4.82057	5.04961	5.15997
CDK4	1.54476	0.000349584	0.00620879	6.83315	5.28839	7.393	7.68103	6.68044	6.95863	6.75558	6.74714	6.18377	7.02454	6.31759	6.58982	5.5898	5.99541	5.6676	2.2632	5.2772	5.27592	5.84096	5.08686	5.53558	6.35137
CDK5	0.719197	0.0251578	0.12266	5.09622	4.37702	5.37694	6.26267	4.81158	4.84411	4.31531	5.03111	5.32566	5.08919	5.08261	4.82304	4.56869	4.37749	3.8277	5.95952	3.72342	3.85846	5.79811	4.27236	3.54439	3.84011
CDKN2A	1.47623	5.81906e-06	0.000300162	5.22331	3.74708	5.14149	5.60004	5.57655	5.50436	5.31841	5.94827	5.87364	3.91875	5.59861	3.75296	3.96696	3.73047	3.69725	3.97479	3.60148	3.84726	3.85982	3.56367	4.03132	3.19778
CDKN2AIPNL	0.962898	0.000804713	0.0111706	3.99689	3.03399	3.38026	5.09731	4.70269	4.11893	4.94506	2.9663	3.64378	4.0116	3.58727	3.51568	3.27802	3.26362	2.82719	3.77078	2.52013	3.23651	2.55943	2.74665	3.14428	2.99327
CDKN3	1.4845	2.59038e-05	0.000922215	4.01224	2.52774	4.2471	4.47742	3.89995	4.82218	4.61947	4.22317	3.06824	3.35551	4.9842	2.42521	2.26836	2.66388	2.63269	3.5264	2.74766	2.22892	2.26738	2.23624	2.35522	2.35069
CDR2	0.862569	0.0332538	0.147467	6.16509	5.30252	6.09008	5.91138	6.35084	6.59769	5.98995	7.56382	5.47977	5.82403	6.34869	5.49463	5.75329	5.9164	5.04359	2.34968	5.42958	5.12901	5.5314	5.41725	6.22369	6.23132
CDR2L	0.713226	0.0197696	0.103996	6.23313	5.51991	6.70868	8.23431	5.87215	6.40443	5.87215	6.40191	6.08217	5.35892	6.35711	5.03949	6.01293	5.62427	5.70359	5.65965	5.18751	5.88767	5.60033	5.1475	4.84518	5.53047
CDT1	0.696457	0.0164994	0.0919875	3.54538	2.84893	3.56367	5.17046	3.17363	3.25938	4.81926	3.1669	3.04077	2.67444	3.77028	2.81504	2.6804	3.03852	3.26467	2.51883	2.28048	2.77209	2.89807	3.17325	3.04154	2.82143
CELF4	0.936517	0.00055883	0.00861034	4.43499	3.49847	3.74699	3.94014	4.63834	3.82987	5.17728	5.45056	4.82342	4.15243	3.74823	4.84263	3.69464	3.17325	3.18668	4.21415	3.7868	3.27243	3.09296	3.11951	3.36199	4.08232
CELSR3	1.12397	0.000238944	0.00470381	4.68525	3.56128	5.57477	5.1872	4.31563	3.9584	3.87866	4.10808	5.22288	5.26409	4.27488	5.06785	3.56415	3.15209	3.40149	3.74375	3.06404	3.69241	4.7796	2.75887	3.85146	3.60491
CEMIP	0.614069	0.0202767	0.105913	5.12343	4.50936	5.76552	4.10556	5.41311	5.73888	5.60675	4.25047	5.30079	4.91038	4.69284	5.45003	4.62222	4.04713	5.06576	3.27519	4.52876	4.5348	5.13974	4.46276	4.80415	4.61313
CENPA	1.75586	3.37902e-06	0.000203152	5.82152	4.06567	5.50543	5.76898	6.09881	7.27992	5.66397	6.12388	5.13619	5.84235	6.57356	4.22214	3.8234	4.31808	4.01313	3.19321	4.03446	4.056	4.99446	4.116	4.18753	3.9204
CENPB	0.611239	0.00182484	0.0197536	4.47696	3.86572	4.23052	4.24521	4.23509	5.24168	4.91309	4.23719	4.54378	4.13781	4.11234	4.87286	3.88114	3.57114	3.74098	3.166	3.70497	3.7896	4.05579	4.0652	4.1231	4.55926
CENPE	1.30417	2.01655e-06	0.000142407	4.06771	2.76354	3.42062	4.49358	3.95917	4.37653	3.84216	4.90745	3.87261	3.928	4.88369	2.99327	2.5256	2.87031	2.82719	2.61863	2.38637	2.71031	2.65468	2.97783	3.14687	2.91763
CENPF	2.18439	2.8157e-10	3.13176e-07	5.80839	3.624	5.52966	5.48752	5.74369	5.97418	5.73138	5.84208	5.64349	6.54532	6.49772	5.08885	3.1303	4.49599	3.76492	2.82143	3.90935	3.6705	3.54307	3.74732	3.48723	3.66986
CENPJ	1.11259	0.000146947	0.0032894	5.95029	4.8377	5.7226	5.56227	6.19486	6.64409	5.62974	5.68886	7.27008	6.38549	5.01988	5.38507	5.36338	4.81012	4.81041	4.18662	5.20049	4.33368	4.98866	5.06683	5.27465	4.34218
CENPN	0.779059	0.000424366	0.00716511	4.28875	3.50969	4.23112	4.71404	3.9684	4.85455	4.40734	4.04067	4.20714	3.89698	4.73848	3.82876	3.50998	3.66001	3.67158	2.93217	3.70875	3.37981	4.00414	2.66872	3.31912	4.2426
CENPU	2.47708	9.49763e-08	1.88946e-05	6.61332	4.13623	7.3647	6.63128	6.59338	6.03117	6.58119	7.63208	6.62671	6.20834	6.50188	5.96245	3.88028	4.8099	5.04961	2.24426	4.98109	3.77963	4.22432	4.16796	3.2765	4.9488
CEP55	3.3474	8.02461e-08	1.83084e-05	5.90706	2.55966	6.32195	6.81577	5.93046	6.86083	6.31299	5.26053	4.95094	5.9668	7.64263	3.00769	1.56026	3.49585	2.97158	2.39666	2.72432	2.47872	2.42615	2.64896	1.8475	3.04659
CEP72	1.29525	6.64465e-05	0.00184187	5.34292	4.04766	5.07266	6.20337	4.97948	6.19393	3.69725	5.62127	5.17134	5.51626	5.70287	5.27072	4.25685	4.65273	3.551	3.5701	3.46337	4.37536	4.54344	3.69544	3.7874	4.58094
CEP76	1.04351	0.00160158	0.0180276	5.0148	3.97129	4.14576	5.18282	5.72809	4.94139	3.61276	5.79198	4.74228	5.98142	5.14149	4.88003	2.93713	4.34487	4.26296	2.90469	4.16125	4.53711	4.58041	3.90504	4.32814	3.7513
CERS1	1.36822	0.000173411	0.00373487	4.36176	2.99354	5.34463	5.18139	3.59715	3.79887	5.69591	3.46258	5.54218	3.2266	4.17431	3.59399	2.61029	2.84864	3.16157	3.10928	2.73295	3.14744	2.70838	3.03097	3.3233	3.2626
CGREF1	0.783435	0.000561332	0.00863393	4.15587	3.37243	4.33789	3.86795	4.13671	4.71532	3.85075	4.38969	3.02714	3.90095	4.77374	4.55855	3.32039	3.15608	3.26362	4.12645	2.97639	3.0573	3.49734	3.66457	3.2192	3.443
CHAF1B	0.766883	0.00022138	0.00446169	4.17287	3.40599	4.15625	4.65756	3.7016	3.5845	4.13093	4.11493	3.96532	4.36911	5.20362	3.84488	3.50956	3.48769	3.20702	3.28123	3.58892	3.23403	4.0266	3.13911	3.20893	3.37678
CHCHD3	0.7958	0.0224545	0.113588	8.29882	7.50302	8.05901	8.81775	8.80985	9.25445	8.31343	8.55845	7.34724	7.41798	9.05399	7.35602	7.59401	8.53013	8.11682	5.51885	7.19425	7.64382	7.61643	7.97125	7.53692	7.30768
CHCHD7	1.25868	7.96338e-05	0.00209639	7.29109	6.03241	6.6848	6.90604	7.39222	8.4272	7.59226	7.77917	7.59532	6.07348	7.20493	7.25547	5.74896	6.64616	6.24972	4.93302	5.67348	6.53453	5.57687	6.00346	6.69279	6.26507
CHD6	0.686834	0.0025694	0.0251774	3.05452	2.36768	2.90178	2.45437	3.61836	3.41725	3.2967	2.04179	4.19626	3.22468	2.61253	2.78145	2.49568	2.44505	2.1184	2.11265	2.16792	2.43615	2.59058	2.32511	2.5363	2.44901
CHEK1	1.23007	7.10077e-05	0.00192337	3.97366	2.74359	4.06287	4.91309	3.3766	4.67372	4.34921	4.02101	2.59497	3.90373	4.42072	3.42062	2.44969	2.84706	2.89639	3.53103	2.44766	2.22236	3.45592	2.37798	2.67421	2.53358
CHEK2	1.6263	1.57101e-06	0.000119591	6.11302	4.48672	6.48776	6.31406	7.19754	6.12986	6.29988	6.13685	5.79923	6.16052	5.73305	4.87143	5.05785	4.8612	4.39343	3.38037	3.89796	4.50909	4.42233	4.558	5.31303	4.47392
CHKA	0.741956	0.0026648	0.0258635	6.33114	5.58918	6.35918	6.85064	6.09352	5.19467	6.00395	6.27642	7.12984	7.23948	6.0386	6.12506	5.15402	5.55451	5.3506	5.73921	6.10707	5.53365	5.17949	6.00683	6.04485	5.22156
CHODL	2.07895	0.000185741	0.00391372	5.91427	3.83532	6.51226	7.00542	3.63873	5.33859	6.49153	8.31914	3.77768	5.88855	6.89537	5.27543	3.36048	5.11061	4.17531	3.51554	3.64514	3.67893	4.16567	3.48744	3.61672	3.59735
CIAPIN1	0.862005	0.00216603	0.02232	7.32973	6.46773	7.24994	8.57534	6.73774	7.80244	7.82017	7.83476	7.03749	6.62276	6.88561	6.73107	6.28199	6.88561	6.70255	5.32123	6.12443	6.57713	6.65467	6.37597	6.66724	7.08646
CIT	0.796299	0.000342935	0.0061151	6.29334	5.49705	6.78104	5.62172	6.19624	6.10756	6.69773	6.0405	6.78547	6.66053	6.06638	5.97626	5.94623	5.4838	5.08317	6.28647	4.92326	5.08007	5.25285	5.79198	5.35852	5.7641
CKAP4	0.599468	0.0229192	0.115235	8.59954	8.00007	8.74718	8.18638	7.72449	9.1055	9.29639	7.70138	8.95812	9.32503	8.2603	8.6906	7.85815	8.95984	8.65422	7.47166	7.71251	7.42061	7.65545	7.78791	7.93363	8.5467
CKAP5	0.676572	0.000257489	0.00496802	5.91365	5.23708	6.3044	5.85009	5.39831	5.42256	5.75662	6.81282	6.23375	5.75968	5.96624	5.63207	5.39857	5.60054	5.24642	5.01101	4.99366	5.49881	5.09786	5.20404	5.12402	5.19589
CKLF	0.757149	0.00910042	0.0618606	5.76042	5.00327	5.09402	6.18954	5.46692	5.86201	5.73692	6.63059	5.21249	5.48161	5.64716	6.28293	4.97575	5.15691	5.49677	3.1895	5.0162	5.47625	5.25877	4.99366	4.62734	5.84155
CKMT1A	0.780124	0.0469889	0.186281	5.53477	4.75465	4.296	6.13979	7.06656	5.81095	4.61859	4.20293	6.53633	5.70614	4.44714	6.52328	4.58155	5.56847	5.04061	3.27097	4.82492	4.87586	5.0682	5.20198	4.14166	4.97227
CKS1B	1.56743	0.000204886	0.00422987	8.76475	7.19732	7.85815	10.0545	8.7432	9.97143	9.18462	8.95435	8.35355	7.3056	9.1599	8.06218	6.46603	7.65921	8.64166	7.87172	6.10086	7.40365	7.12114	6.78318	6.51563	7.41011
CKS2	2.69785	2.23559e-06	0.000154804	7.9912	5.29334	7.38453	8.37681	8.27353	8.30235	9.11188	8.47905	7.31264	8.43278	8.01739	6.22104	4.70782	6.17128	5.96072	2.95907	5.74451	4.44487	7.16403	4.84384	5.15963	5.77766
CLCN2	1.06486	0.0004233	0.00715389	4.96224	3.89738	6.70255	5.30829	4.60146	4.86	5.10787	4.2207	5.07438	5.10938	4.06287	4.57491	4.18833	3.53228	3.27519	4.68546	3.94817	3.71406	3.72785	3.6667	3.9386	4.29717
CLDN3	1.18298	0.000770001	0.0108101	6.60292	5.41995	7.28431	7.75471	5.20849	6.38939	6.9372	7.61716	7.27992	5.3177	5.95801	6.28236	4.95799	5.33295	5.89229	5.01483	5.10133	5.49434	5.76166	5.38909	5.0934	6.16158
CLDN9	0.603056	0.00626065	0.0472038	4.79316	4.1901	5.82191	4.25276	4.77209	4.82135	4.50926	4.70987	5.30253	4.40108	4.21268	5.12805	3.81377	4.11697	3.83493	3.41083	4.34487	4.23313	4.59757	4.42792	4.51782	4.60321
CLEC4F	0.734674	0.0368719	0.158995	4.53047	3.79579	6.00516	4.01849	3.87039	4.82443	3.55803	4.00525	4.50506	4.07042	3.68819	6.75925	3.66783	3.88389	3.68401	3.44908	3.48317	4.23669	3.74431	4.40169	3.60265	3.80463
CLEC5A	0.94719	0.0145737	0.084535	3.34561	2.39842	2.27155	2.89189	4.60857	4.41951	2.34772	3.49734	2.22769	4.06975	4.98992	2.13218	2.03741	2.16686	2.63221	1.74628	2.24426	2.86021	3.02179	2.94165	2.06163	2.2719
CLIC3	0.964406	0.00310334	0.0287941	3.21962	2.25521	4.26992	2.66424	2.65897	2.91868	3.32075	4.08716	5.02038	2.39908	2.25905	2.59794	2.40068	2.22333	2.62105	2.34026	2.17121	2.15172	2.05888	1.9114	2.0836	2.58998
CLIC5	1.29381	0.0016165	0.0181726	6.57246	5.27865	7.64263	5.42139	6.12093	6.84812	5.17915	5.95504	8.13948	5.82552	7.70469	6.88766	5.28133	6.46248	6.21721	4.64518	5.09627	5.45134	4.69119	4.95094	4.77532	5.21525
CLIP2	1.07626	0.000394432	0.00678195	4.01234	2.93608	5.92019	3.79451	3.78645	3.14249	4.93943	4.0079	3.6667	3.66405	3.61914	3.58257	3.19642	2.77646	2.82719	2.70937	2.68129	3.01299	3.11402	2.68087	3.06079	3.30144
CLIP3	1.06741	0.0203208	0.106028	5.73524	4.66783	8.93024	4.7515	4.52495	5.00955	4.95305	4.58094	6.37597	7.09526	5.79061	5.34033	4.81823	4.38373	4.76408	4.87404	4.4676	4.43034	4.2468	4.54116	4.81608	5.33622
CLK2	0.733958	0.000599701	0.00907506	9.25479	8.52083	9.70773	9.1083	9.38558	8.60246	9.16374	9.49688	9.33428	9.67273	8.43278	9.64341	8.64295	8.18437	8.29294	8.20651	8.95028	8.55678	7.85049	8.89784	9.01041	8.61571
CLK3	0.692735	0.00270441	0.026128	6.07298	5.38025	6.56424	6.68741	5.87905	5.70359	6.38092	5.95801	6.14682	5.89397	5.38644	6.1294	5.81378	5.73675	5.33943	4.79666	5.38541	5.80917	4.14317	5.61198	5.64349	5.52264
CLN3	0.861346	0.0090953	0.0618606	5.50213	4.64078	7.4587	6.56935	5.47406	5.27949	4.78026	5.74003	5.36295	4.67232	5.56314	4.12098	4.53385	4.7908	4.70327	4.74051	3.96224	4.89878	4.60561	4.81987	4.4129	4.94
CLNS1A	0.729487	0.0162746	0.0909907	8.39527	7.66578	8.5222	9.32503	9.16913	7.30967	7.97393	8.34459	7.43357	8.78151	8.61063	8.48243	8.01435	8.01435	8.12685	6.07626	7.83911	7.1265	7.95258	7.40591	7.97031	8.1316
CLPB	1.16392	3.64408e-05	0.0011921	5.1553	3.99138	5.05447	5.19248	5.09059	4.21247	5.87215	5.71331	6.12443	4.56005	5.21097	4.52206	3.55729	4.14954	4.38969	4.66538	4.21365	3.6588	3.75393	3.52691	4.22574	3.77287
CLPTM1L	1.47256	0.000613627	0.00919201	7.65243	6.17987	8.68065	9.07785	6.94808	8.12495	7.27992	6.96699	7.24838	7.3535	8.39727	6.44671	5.94623	7.21223	7.11059	3.99268	6.15993	6.2301	6.4175	6.31628	6.12281	6.29034
CLUL1	0.65477	0.0195034	0.103176	4.24298	3.58821	5.45513	3.23188	4.295	3.60148	4.00538	4.60812	4.4889	4.42792	4.75451	3.56149	3.42524	4.07859	3.70402	4.79954	3.13287	2.98621	3.59378	3.38482	3.72841	3.04861
CMC2	0.639893	0.0134594	0.0798679	7.02919	6.38929	6.46889	7.20225	6.62276	7.79013	7.39868	6.81176	7.44915	6.50735	6.9137	7.12719	6.69743	6.6705	6.87768	4.77729	6.09692	6.50362	6.81176	6.42398	6.07163	6.96212
CNPPD1	0.640819	0.000892863	0.011994	5.86937	5.22855	5.65112	5.56805	6.30733	5.87145	6.0528	5.52927	6.45859	4.94346	5.77856	6.53304	5.28754	5.34896	5.31464	4.80415	5.1307	5.31873	5.09482	5.16982	5.30942	5.50672
CNPY2	1.29474	7.62584e-06	0.000371688	6.61728	5.32254	7.14419	6.03549	6.5571	6.75654	6.24112	7.10308	6.65853	7.36095	5.86482	6.45094	5.34215	5.91264	5.6537	3.93397	5.46472	5.45317	5.21628	5.43207	5.39613	5.42058
COA7	1.0285	1.03423e-06	8.97816e-05	5.82465	4.79615	6.04211	6.07061	6.30189	5.53422	5.88232	6.2601	5.15731	5.78627	5.56575	5.64597	4.56005	5.25201	4.9405	4.78447	4.73112	4.29311	4.57034	4.61076	5.06144	5.15771
COL10A1	0.847868	0.0476652	0.188124	3.92822	3.08036	4.55515	2.69925	2.73606	6.05196	3.20088	5.42336	3.14428	3.34469	4.69216	3.43445	2.89639	2.83793	2.66217	4.9668	3.12551	2.69125	2.93217	2.8278	2.7758	3.08774
COL11A1	1.76008	0.0391112	0.16504	4.5036	2.74353	5.74661	2.68295	2.36803	10.4913	3.38577	4.20293	7.45156	2.80075	3.35551	2.5506	2.77669	2.71098	2.68295	4.29341	2.28967	2.35911	2.55393	2.61961	2.36391	2.78503
COL13A1	1.25694	0.00173671	0.0190899	6.68945	5.43252	7.45927	4.79035	6.76737	7.16657	6.81142	8.21617	7.24531	5.74369	6.89412	5.80027	5.48461	4.35923	4.79442	5.23046	5.15929	6.05348	5.03765	6.37403	5.94471	5.88726
COL18A1	1.16547	0.014658	0.0848703	8.07254	6.90707	10.5001	8.45425	6.49092	7.13287	8.39727	7.68522	9.46457	7.48109	6.13685	8.98228	6.77628	6.69548	7.22803	8.39727	7.03881	6.55347	6.51921	6.57432	6.37834	6.9095
COL1A1	0.587498	0.00104609	0.013393	6.00407	5.41657	6.50897	5.401	5.51937	6.23846	5.80373	6.56424	5.84798	6.21322	5.86763	6.07608	5.46957	5.85219	5.55601	5.65321	5.27642	5.24458	4.83731	5.27332	5.65656	5.3465
COL1A2	1.82427	0.00154878	0.0176642	9.92542	8.10115	11.0927	8.57268	8.39727	12.1785	9.06215	11.2632	8.49539	10.6081	9.89769	9.68652	7.91081	10.0221	9.00826	6.19423	8.38641	7.98124	6.80452	8.3435	7.97637	8.38404
COL4A1	1.30528	0.000226847	0.0045564	6.64406	5.33877	7.18159	7.32723	5.47656	7.76547	5.53987	7.27499	7.37239	5.39678	5.98862	7.11706	5.22432	5.87117	5.66722	5.51937	5.05624	5.36884	5.20509	5.00638	4.92342	5.54568
COL4A2	0.766959	0.0480594	0.18926	7.12201	6.35506	7.36249	7.10156	6.20337	7.40265	5.86006	7.29773	8.83099	5.78663	6.67172	8.70293	6.74118	6.11751	6.21038	7.63143	5.58088	6.59063	6.22825	5.89343	5.66442	6.89245
COL5A1	1.23822	0.020522	0.106849	6.69621	5.45799	7.27073	4.62868	6.32529	9.1668	4.60926	7.63143	8.68707	6.66803	5.49097	6.48381	5.72031	6.21125	5.66493	5.46766	5.43903	4.66386	4.09091	5.72175	5.68083	5.91934
COL5A2	1.24458	0.00211513	0.0219042	6.13794	4.89336	6.84551	5.68954	4.16181	8.32201	6.31406	6.48433	5.79668	5.4866	5.84592	6.43291	4.12516	5.1882	5.32684	4.18688	5.86989	4.86474	4.59599	4.99094	5.10043	4.68449
COL6A2	0.652531	0.035595	0.154953	4.82525	4.17272	6.57505	4.82276	3.75461	5.45919	3.92672	4.90457	5.89115	4.60561	3.97914	4.33368	3.85338	4.22013	4.35312	4.51287	4.10842	3.99521	3.65897	4.52909	3.97938	4.5166
COL9A1	1.04503	0.00174892	0.0191531	3.94076	2.89573	4.57833	4.49125	5.16543	3.48355	2.97104	3.15857	5.43488	3.49987	2.94664	3.67807	3.04138	2.7903	2.93127	2.33031	2.70937	2.84616	2.74014	3.0286	2.88995	3.64981
COL9A2	1.23034	0.0104505	0.067037	6.24444	5.0141	8.85434	4.8268	6.26175	5.59372	4.91819	6.38057	8.59623	5.54358	5.00284	6.46636	5.0114	5.06965	5.54218	5.0682	4.47261	5.05268	4.49232	5.09994	5.23797	5.09402
COL9A3	2.2745	0.012367	0.0755259	5.23121	2.95671	8.77534	2.94349	4.79954	2.87464	2.60869	4.77601	10.6473	4.49458	2.98089	7.41164	3.22135	2.96486	3.23033	2.28181	3.35169	2.61414	3.17226	2.67553	2.66348	3.39169
COLGALT1	0.600373	0.015166	0.0867549	6.17939	5.57901	6.18335	6.43801	5.82764	5.97991	5.98289	6.33245	6.43654	6.37323	6.0473	6.19254	5.6307	5.34215	5.31232	7.55708	5.38802	5.21706	5.3678	5.21249	5.16618	5.59633
COMMD2	1.6779	6.1664e-05	0.00174186	6.16534	4.48744	5.90385	5.44744	5.79811	6.80617	5.94783	6.37456	5.60928	5.69531	7.57314	6.49772	4.07132	5.47195	4.61978	2.24139	4.28889	4.97931	5.36617	4.28385	4.59975	4.95193
COMMD5	0.746334	0.00181133	0.0196573	6.79347	6.04713	7.04257	7.71794	6.68693	6.2214	6.21226	7.12443	7.13441	6.19362	6.91895	6.68215	6.06859	5.67094	6.24277	6.94236	6.25145	6.10215	5.11104	5.95209	5.93046	6.19948
COMMD9	0.752654	0.00402842	0.034516	5.40874	4.65609	5.72629	5.71134	4.87286	5.5051	5.19938	4.8991	6.52851	4.61076	5.50101	5.53304	4.35583	4.53447	4.59999	3.68002	5.00835	5.34975	5.15833	3.98082	4.86627	5.02704
COMP	2.16103	0.0255066	0.123818	4.81612	2.6551	10.5249	3.20172	2.84289	9.78905	2.62871	6.34778	2.59569	4.07474	3.30793	2.84788	2.35264	2.9022	2.52013	3.35571	2.8323	2.8378	2.32485	2.21767	2.90178	2.30588
COPB2	0.833368	0.0392021	0.165318	8.32016	7.48679	8.50472	7.34496	7.56013	8.84959	8.73768	9.18776	7.75003	8.22368	8.61363	8.42941	7.27423	8.36695	8.14231	4.42014	7.90193	7.81559	8.07472	7.72449	7.66012	7.48744
COPG2IT1	2.09535	0.0001245	0.00290001	6.2484	4.15306	7.27885	8.03406	7.39006	6.71439	4.72735	6.56935	7.59401	4.76312	3.79569	5.61717	3.87914	4.56543	4.35159	3.27682	4.81272	4.26021	3.72278	4.0673	4.31046	4.28411
COPS6	0.60458	0.025863	0.124596	7.75913	7.15455	6.8604	7.94582	7.71506	8.38822	8.50101	8.14814	7.46541	6.89836	8.06077	7.60816	6.60256	7.52926	7.37678	5.82149	7.42061	7.45561	6.69467	7.28144	7.42846	7.93467
COQ6	0.627366	0.00937128	0.0628228	5.48712	4.85975	5.69531	5.30135	5.17377	5.39931	5.80615	5.76266	5.56868	4.91003	5.08261	6.17128	4.38807	5.08722	5.39335	3.6445	5.67268	4.82979	5.3647	5.07309	4.81527	4.32883
COQ9	0.687129	0.028286	0.132607	7.6715	6.98437	7.27008	8.87441	7.13871	7.36747	7.97985	8.32286	7.60001	6.75696	7.15677	8.24784	6.58377	7.12114	7.0849	5.18475	7.73219	7.57314	6.88766	7.27073	7.26059	7.1448
CORO1C	0.702137	0.039722	0.16672	6.12691	5.42477	6.93332	6.93042	5.9839	7.25463	6.39042	5.13486	5.02188	6.01807	6.49695	5.10466	5.67463	6.05655	5.56398	3.69287	5.06546	5.28509	5.30978	5.9164	5.82097	5.86201
COX17	0.698264	0.0196256	0.103489	5.65306	4.9548	4.97792	5.10541	5.94057	6.79976	5.81017	5.42992	5.22352	5.63803	6.04837	5.55695	5.13006	5.66442	5.37051	3.06101	4.83243	5.65618	4.97598	5.29756	4.83137	4.72844
COX5B	0.783524	0.000532433	0.00835406	8.71912	7.9356	8.39242	8.10321	8.94796	8.78976	8.94595	7.93832	9.30075	8.35591	8.75658	9.66033	8.00163	7.7741	8.03132	7.18231	8.27169	8.00163	7.74608	8.1513	8.17848	8.01739
COX6A1	1.11148	0.00525286	0.0420323	9.12318	8.0117	9.30668	7.72251	9.05399	10.2232	9.71241	8.63219	9.8389	8.75363	8.7664	9.22195	7.9292	8.40432	8.65306	5.42733	8.58041	8.46164	8.49231	7.73743	7.96738	8.46397
COX6B1	1.40103	4.15581e-06	0.000238571	9.64391	8.24288	10.2742	8.66885	9.44082	9.67717	9.89769	9.56445	10.5923	9.98826	8.83517	9.5002	8.46889	8.24727	8.52932	7.13023	8.81204	8.15658	8.40898	8.08514	8.1099	8.48049
COX6C	1.47877	0.00172498	0.0190079	9.82687	8.34811	9.319	10.5001	9.42855	10.5546	10.2471	10.3102	9.98469	8.69228	9.78905	9.44312	8.55478	9.1668	8.8071	4.85126	8.96377	8.56031	8.41723	8.78529	8.67623	8.69829
COX7B	0.643353	0.0435932	0.17716	8.79208	8.14873	7.40684	7.923	9.08272	9.39916	9.23083	9.37195	9.47741	7.98572	9.13034	8.91287	8.21066	8.634	8.51248	6.28647	8.16309	8.40898	8.40301	8.25753	8.20514	8.40594
COX8A	0.645091	0.00142892	0.0166638	8.31612	7.67103	8.05399	9.02126	8.25862	7.88502	8.63219	8.21943	8.83767	7.40684	8.31605	8.53013	7.50194	7.75841	7.68582	8.18181	7.85922	7.65461	7.6904	7.10236	7.36164	7.91408
CPNE1	1.21566	6.99399e-06	0.000346533	7.41653	6.20087	8.305	7.74696	6.91817	6.76385	6.71509	7.09903	8.48243	7.77591	6.96956	7.38929	6.38075	6.04923	6.37834	6.10477	6.42831	5.84409	6.03747	6.12139	6.356	6.30839
CPZ	0.755612	0.0208097	0.107905	5.35126	4.59564	6.37597	4.36887	5.68083	4.94746	4.39592	6.45044	6.55935	4.99648	4.5853	5.15193	5.49677	3.87354	4.59936	4.80088	4.89878	4.6001	3.86429	4.19599	4.45904	5.16768
CRABP2	1.908	2.78089e-09	1.51232e-06	7.64056	5.73256	7.11861	7.57888	7.21736	7.38845	7.52734	7.87265	7.73144	7.75764	8.06311	8.15007	5.50221	5.77856	5.86592	7.15163	5.60004	5.59722	5.50575	5.2457	5.54297	5.53558
CRIP1	1.88333	3.89288e-05	0.0012485	8.03314	6.14981	8.95435	7.48679	8.60163	8.52093	7.69475	6.79499	8.26148	7.07686	8.18181	8.75776	6.25083	5.4838	6.46462	4.28561	6.52146	7.43722	7.28761	6.70691	5.16691	5.8931
CRIPT	1.00668	0.00352088	0.0314546	6.07044	5.06376	6.37777	5.40142	7.00877	5.90074	5.59722	5.85794	5.99586	5.87364	6.88999	5.80104	4.8351	5.87481	6.24648	3.13972	4.99141	5.75632	5.50861	5.01211	4.68818	4.58482
CRMP1	0.739867	0.0210594	0.108882	5.3658	4.62594	5.57622	4.53734	5.24079	4.91656	4.61372	5.72608	6.65972	6.80029	4.28211	5.3052	4.66316	4.80415	4.63446	5.87172	4.53597	4.23313	4.0386	4.68064	4.29191	4.50561
CRYAB	0.629077	0.0268923	0.128092	5.09939	4.47032	4.32986	5.72305	4.89537	4.36732	5.23707	5.4866	5.79972	4.24869	5.44966	5.45659	4.40769	5.00638	5.40852	3.35348	4.9158	5.0022	4.09566	3.98496	3.85617	4.67232
CSE1L	1.58715	2.58605e-05	0.000922215	8.55966	6.97251	8.60163	7.88857	8.24727	8.4422	8.83356	8.45302	9.03332	8.92357	8.57534	8.5981	7.32465	7.62943	7.26213	4.41623	7.14339	6.87422	7.2313	6.98996	7.31955	7.53427
CSNK2A1	0.751837	0.0046888	0.0386843	6.28047	5.52864	5.67891	6.48853	6.18833	6.12697	6.42711	5.51779	6.82546	6.54414	6.64352	6.36398	5.62079	6.0886	5.89526	3.74589	5.42336	5.75915	5.93343	5.73088	5.4076	5.6814
CSNK2B	1.25682	0.00143894	0.016715	8.12911	6.87229	9.06562	9.68272	7.9055	7.07973	8.17007	7.46943	8.74718	7.01648	7.6904	8.46397	7.2109	7.19477	7.23486	4.91466	6.90135	7.38095	6.46319	7.22447	6.78347	7.41424
CST3	0.931626	0.0242908	0.119977	6.80774	5.87611	7.6895	6.33313	6.14132	6.70562	6.34869	7.04719	8.27814	6.38209	5.17377	7.97793	4.50084	6.31455	6.83741	4.22913	6.29936	6.11084	6.25503	5.50418	6.0796	6.63018
CSTA	0.972505	0.0102928	0.0663717	4.5465	3.57399	4.81158	3.45838	4.60413	4.41222	3.89725	3.18574	3.54021	6.03933	6.29962	5.21652	3.72575	3.13694	3.23562	3.92846	3.18889	3.41565	3.28716	3.41279	3.91852	4.49015
CSTF1	1.28312	6.05302e-06	0.000309539	4.9797	3.69658	5.33964	5.44027	4.88859	4.95305	4.69088	5.11761	5.15691	5.10466	5.08885	4.0165	3.04512	3.51115	4.50166	2.56091	3.56149	4.02926	4.25012	3.91416	3.92231	3.6696
CT45A1	1.2474	0.0229258	0.115235	3.04343	1.79603	1.66136	2.14321	1.66611	2.98712	5.5149	1.64224	5.57437	1.74207	2.25201	5.25089	1.67033	1.56026	1.93152	1.87029	1.86779	1.78451	1.9103	2.06789	1.62656	1.67081
CTB-92J24.2	1.17965	0.00028313	0.00533184	5.86175	4.6821	5.25201	5.56279	6.61032	4.89287	5.78315	6.12875	5.71545	6.48776	7.29388	4.89056	4.39767	5.53915	4.90173	4.26351	4.63645	4.34527	4.36911	5.05624	5.11703	4.19488
CTC-338M12.4	1.30935	0.000522541	0.00826591	6.17799	4.86864	5.21295	5.50712	7.07284	5.27072	6.72938	5.95209	5.38134	8.10406	5.35317	7.19622	5.01589	4.93488	4.66122	4.1978	4.91734	5.02677	4.72327	5.20009	5.2567	4.75242
CTCFL	1.87174	0.0017311	0.0190518	3.98247	2.11073	4.11364	4.84435	2.68087	3.95444	5.55402	2.65377	2.80489	2.34459	7.89099	2.98311	1.83589	2.24612	2.89236	1.93881	2.19551	1.9775	1.82051	1.95208	2.24993	1.99861
CTNNBL1	0.637563	0.0146601	0.0848703	7.49447	6.85691	8.69944	7.3647	7.11777	7.58545	6.77689	7.24531	8.29294	7.34072	6.8168	7.70469	6.87528	6.58326	6.96212	8.11786	6.35007	6.81577	6.36534	6.85976	6.66195	6.97767
CTPS1	1.60289	0.000493623	0.00791837	6.61818	5.01529	6.81413	7.4777	7.06951	6.47674	6.99722	6.92554	5.71725	7.93904	6.50563	4.25905	5.23033	5.89526	5.70984	3.36802	4.26122	4.47125	6.00395	4.92937	4.89348	5.3902
CTPS2	0.844996	0.0184876	0.0992477	6.85256	6.00756	6.35672	5.45997	7.32635	6.65293	7.00206	8.78644	6.77939	6.76958	6.43352	6.95863	6.41044	6.56173	6.12139	4.06673	5.91411	6.0528	5.97602	6.21762	6.27524	6.47953
CTSA	0.971008	0.000116888	0.00277722	7.92273	6.95172	8.89784	8.71221	7.17668	7.66012	7.5512	7.54839	8.33755	7.68252	8.07536	7.58545	6.77838	6.44153	6.97242	7.39645	6.44613	7.37569	7.36873	6.74519	6.89915	7.09356
CTSF	0.757237	0.0147616	0.0853193	7.27961	6.52237	8.41328	7.93663	5.4317	6.42499	7.34072	6.76614	7.25153	7.53994	8.18288	7.50827	6.84998	6.03117	6.25557	6.60577	6.40106	6.2301	6.55517	6.33509	7.08121	6.87861
CTSV	1.20178	0.0130354	0.0781794	6.44503	5.24325	6.32195	8.16815	5.7226	6.57469	7.13811	7.21164	4.86551	6.87369	7.26659	4.30734	4.54974	7.192	6.04639	5.96961	4.03701	4.774	5.10621	4.75979	5.13817	4.85953
CWC15	0.604778	0.0124847	0.0760623	7.90419	7.29941	7.84537	7.40591	8.25388	7.54471	8.4272	7.78085	8.48673	7.4851	7.33812	8.47404	7.44987	6.97165	7.51214	5.89783	7.67075	7.66725	7.03051	7.61197	7.558	7.62416
CXXC5	0.903952	0.00278739	0.0266986	9.34456	8.44061	8.48811	8.75171	9.5768	9.76736	10.2232	8.09223	10.3768	9.37822	9.57339	9.21783	8.82908	7.81656	8.53519	7.88502	8.73255	8.65765	7.59401	8.68385	8.56031	9.11188
CYC1	1.62044	0.000238098	0.00469755	8.99425	7.37382	7.67901	10.8265	9.27645	8.32706	8.92357	9.15275	8.80843	7.73883	10.5001	8.70981	7.02204	8.19379	7.96299	5.77916	7.26213	7.27135	7.52307	7.42373	7.4249	7.87498
CYHR1	0.600978	0.00244337	0.0243871	5.79245	5.19148	5.68299	7.01648	5.9103	5.30641	6.2474	5.86341	5.47497	5.60366	5.40068	5.41824	5.40736	5.03111	4.84724	5.53009	5.3052	4.99686	5.2302	5.21389	5.26434	5.08848
CYP46A1	0.770086	0.0082983	0.0579351	4.16425	3.39416	3.75039	3.65338	2.9343	4.03968	5.78082	4.14085	3.8626	4.86234	3.95004	4.66805	3.32408	2.93385	3.0128	3.5701	3.58167	3.22995	3.35892	4.09239	3.90915	2.92868
CYP4F3	1.1905	0.0221809	0.112649	4.89069	3.70019	4.12915	4.313	5.27408	3.86578	3.33632	8.02626	6.28573	5.95952	3.82876	3.8883	2.57305	4.64636	4.0855	3.5701	3.92783	3.47139	3.82311	3.07941	3.10258	4.72255
DAP3	0.838542	0.000176486	0.00378084	9.55771	8.71917	9.03809	9.37576	10.3691	10.2883	9.50319	9.62568	9.15551	9.61456	9.3163	9.29065	8.70856	9.08919	8.79886	7.68522	8.79458	8.98644	8.64943	8.73768	8.82054	8.9212
DAZAP1	0.640817	0.0247468	0.121321	5.89047	5.24965	6.81474	5.79327	6.23648	5.51091	6.47298	4.50873	5.38507	6.46319	5.30177	6.4175	5.59633	5.15145	4.88675	5.78367	5.37121	4.86514	4.15142	5.818	5.5508	5.3217
DBF4	0.950863	0.0143673	0.0839125	7.07699	6.12612	6.50675	7.49076	7.19023	7.75711	7.70371	7.74014	6.42499	6.51669	6.9137	6.5258	6.07446	6.64842	5.75476	3.42899	6.63625	5.90186	6.99649	6.27252	7.18549	6.36199
DBN1	1.599	2.46318e-09	1.51154e-06	6.71111	5.11211	6.75976	6.8206	6.34869	6.5823	7.36404	6.20433	7.36164	6.14434	6.84675	6.67864	5.22685	5.35892	5.31118	5.26214	4.68308	4.79512	5.23553	4.72987	5.04847	5.46994
DBR1	0.634293	0.00419749	0.0355538	4.54816	3.91387	4.66068	4.43516	4.50828	4.74179	4.99494	3.86867	4.16125	4.4607	5.33819	4.31192	3.28378	4.14731	4.1046	3.08285	4.16125	3.87326	4.32044	3.6705	4.70327	3.79139
DCAF17	0.920198	0.00927092	0.0624471	3.47459	2.55439	4.37025	5.29756	2.82706	3.25214	3.77608	2.66861	2.59622	3.80248	3.41689	2.73863	2.19038	3.25912	3.61809	2.45607	1.82051	2.39989	1.90105	2.99534	3.00694	1.89653
DCBLD2	0.936174	0.00575752	0.044587	4.43086	3.49468	3.51673	4.14469	4.07474	4.62584	5.95753	3.1844	4.81272	4.74471	4.39739	4.84984	4.20407	3.8804	3.57609	2.06441	4.03527	3.63701	3.57134	3.68795	2.61056	3.67973
DCLRE1B	0.721388	0.000848482	0.0115838	5.11453	4.39314	4.43586	5.16982	5.57002	5.80219	5.68003	4.52772	4.9488	4.66354	5.33094	5.01641	3.80627	4.59827	4.46276	4.42045	4.09006	4.90082	4.01956	4.52299	4.29101	4.81926
DCUN1D2	1.55861	0.00028642	0.00537673	6.89827	5.33966	6.97708	6.36199	6.9195	7.02274	6.22505	6.66276	8.20946	7.36164	6.49416	6.74833	6.37356	4.85214	5.54322	2.7564	6.36816	5.29301	4.77902	5.78933	5.88574	5.75605
DCUN1D5	0.759443	0.0378974	0.161965	7.58698	6.82754	7.17058	8.07408	8.88431	7.2389	7.80821	7.94178	6.20772	7.00941	8.11682	7.41798	6.61537	7.40028	7.30078	4.69731	6.71602	6.69279	8.06907	6.68926	6.83475	7.25972
DCXR	0.828459	0.00287192	0.0272102	6.23829	5.40983	6.49024	6.58698	5.13035	6.34256	6.92284	6.03549	6.43522	5.99298	5.83337	6.61287	5.07686	4.81823	5.14703	6.81556	5.65618	5.09438	5.53089	5.02578	4.86995	6.06344
DDAH2	1.29027	0.000126445	0.00292996	7.55242	6.26215	9.11188	8.34771	7.39777	6.57102	6.94613	7.68797	8.01991	7.4249	6.13098	7.88591	6.72938	6.2967	6.25927	5.76266	6.12589	6.15959	6.09881	6.61287	6.42766	6.14869
DDI2	0.60354	0.0317727	0.143127	4.33471	3.73117	4.93158	3.68807	3.83169	4.77068	5.25631	4.67572	3.96466	4.49866	4.55323	3.17651	3.65338	3.54937	3.88336	2.50427	4.16125	3.77768	4.37947	4.14369	3.04901	4.21024
DDRGK1	0.785276	0.000190003	0.00398737	7.67334	6.88806	6.95702	7.73516	7.40826	7.94582	8.0516	7.16657	8.52417	7.72035	7.70785	7.51658	6.82973	6.95271	7.18765	6.31351	6.55517	7.08774	7.29483	6.83616	7.21962	6.60349
DDX11	1.00605	4.62174e-06	0.000256226	5.73987	4.73381	6.2787	5.84096	5.5933	5.59039	5.42378	5.48017	5.88504	6.58639	5.09482	5.6251	4.34487	4.59165	4.83892	5.36933	4.52993	4.43945	4.75242	4.82979	4.79008	4.85167
DDX25	0.822714	0.00212432	0.0219666	2.95072	2.12801	4.04368	2.33058	2.26138	3.87809	2.19221	2.1296	3.63053	3.49331	2.99941	2.54846	2.03741	2.10535	2.44846	2.02705	2.09857	2.30514	1.95786	1.95658	2.33003	2.01364
DDX27	0.745154	0.0115072	0.0716274	9.14751	8.40236	9.25166	8.1513	9.1668	8.83356	9.51676	8.49399	10.3412	9.46102	8.50472	9.75414	9.14547	7.54532	7.74014	9.27645	8.57029	8.15516	7.77917	8.35859	8.72501	8.72798
DDX39A	1.49206	8.48992e-07	7.83454e-05	8.76285	7.27079	8.93216	9.18043	8.41473	8.74085	8.85434	8.67836	9.1668	8.0516	8.95984	8.64943	7.68582	6.50099	6.92141	8.63977	7.16094	6.93813	6.80753	7.38391	6.94236	7.72707
DDX41	0.801934	0.0102677	0.0663296	7.35056	6.54863	7.92754	8.12685	7.18493	6.4572	7.031	6.33064	7.76717	6.96699	7.64885	8.06442	6.38075	6.84706	6.9628	4.70934	6.65415	6.90385	6.44006	7.00324	6.61803	6.96699
DDX49	0.989645	0.000455174	0.00754919	5.22348	4.23384	5.78121	6.18954	5.15517	5.31575	6.0386	4.44467	5.75968	4.1128	4.62699	4.81041	4.10314	4.12629	4.33821	4.51956	4.65156	4.22751	3.88146	3.74834	4.72806	4.01422
DENND1A	0.822274	0.00877011	0.0603297	4.31592	3.49365	4.43559	3.85357	4.32945	5.71252	5.07854	4.62699	4.06196	3.6705	4.66386	2.72622	3.47371	3.38805	4.072	3.61193	3.34588	3.18919	4.23343	2.55486	3.26335	3.80407
DENND4B	0.837677	0.00102888	0.0132608	7.32399	6.48632	8.14231	7.33406	7.91216	6.77331	7.41324	6.73852	7.79628	7.42205	6.01182	7.69617	6.74986	6.05196	6.20788	6.45258	6.8028	6.27919	6.14132	6.91016	6.8028	6.46462
DEPDC1	1.81816	2.2237e-05	0.000826157	4.30291	2.48475	3.71687	5.82764	4.05752	4.01676	4.58236	4.81823	3.36014	4.47452	5.83548	2.33962	2.3723	3.13331	2.51059	2.45139	2.43258	1.86052	2.32061	2.77646	2.30378	2.68599
DGAT1	1.63875	3.96573e-05	0.00126704	7.06105	5.4223	6.88813	9.07167	7.09226	6.37403	6.39268	7.88174	6.98747	6.39867	7.07937	6.44448	5.4076	5.28082	5.51204	7.03567	5.31046	5.31211	4.8273	5.41725	4.69593	5.42378
DHCR24	0.985835	0.00551293	0.0431814	8.63613	7.65029	8.00716	8.95435	8.53519	7.32635	8.68909	10.3184	8.32706	8.07161	9.91593	8.21617	7.74155	8.20348	8.07536	7.78387	6.93265	7.35139	6.98407	6.96864	7.91349	8.54846
DHCR7	1.45493	2.89614e-05	0.00100272	6.10598	4.65106	5.71184	7.15232	6.19254	5.4241	6.79449	6.12281	6.06608	5.28133	6.68332	5.63101	4.43651	5.26434	5.17006	6.02566	4.43621	3.85479	4.20529	4.14984	4.16421	4.80367
DHRS1	0.805763	0.000272557	0.00518182	7.83038	7.02461	7.5742	7.32635	8.33881	8.06907	7.13585	8.15658	8.5222	7.95846	7.20058	8.02165	7.28517	7.63994	6.99649	6.81556	7.13811	7.11655	6.47604	6.86426	7.2313	6.68271
DHRS11	0.726432	0.0213148	0.109744	4.57816	3.85173	6.02623	5.32596	3.94014	4.08817	4.3086	4.64649	4.3832	4.48084	3.55746	5.02451	3.35432	4.86639	4.50656	2.78221	3.73236	4.1435	3.51865	3.32203	3.75677	4.53447
DHRS4	0.60257	0.0133985	0.0796394	6.09513	5.49256	6.51888	5.92434	5.98656	6.31759	6.45258	6.30283	6.07394	6.05655	5.56227	5.75577	5.5149	5.86627	5.80373	3.72658	5.85747	5.77458	6.07587	5.45751	5.30338	5.54531
DHTKD1	0.940681	0.00669951	0.0495324	6.01643	5.07575	6.80452	6.16246	5.15731	6.55454	6.90663	4.98593	5.10864	5.8294	5.713	6.94188	4.82245	5.85547	5.27373	3.85887	5.59179	4.4781	4.77689	4.51956	5.45621	6.12443
DIDO1	0.599251	0.00267602	0.0259523	6.08707	5.48782	6.28091	5.82889	5.69754	5.89783	5.77563	5.2818	6.90733	6.47828	6.22369	6.49875	5.29925	5.90748	5.61274	4.88281	5.57288	5.82889	5.52479	5.54067	5.46078	5.24789
DIEXF	0.586556	0.0195571	0.103352	6.00608	5.41952	5.07061	6.02671	6.58982	5.45279	5.37964	6.90135	5.59112	6.46776	6.84958	5.73138	5.0921	5.81505	5.61468	5.23285	5.11892	5.54322	5.86254	4.80367	5.92258	5.1896
DKC1	0.907935	1.93372e-05	0.000741648	8.35846	7.45053	7.68883	9.25983	8.41544	8.39242	8.17988	8.67444	8.31605	8.36873	7.76808	8.52093	7.90429	7.46541	7.15232	7.15558	7.72035	7.39222	7.10706	7.36249	7.48982	7.75574
DLG1	0.701813	0.000768504	0.0108099	4.79695	4.09514	5.66616	4.58041	4.38724	4.47521	4.84238	4.98109	4.50705	4.58628	5.35123	4.59248	4.0757	4.43651	4.20529	3.08556	4.45643	4.19488	4.09762	4.22287	4.21058	3.96594
DLGAP5	3.48609	3.13789e-08	8.7253e-06	6.31284	2.82675	5.5314	6.75696	6.33431	7.62416	7.07346	7.3577	5.19467	6.09591	7.29773	3.8621	2.33031	4.67313	2.8828	2.96517	2.46674	2.63132	3.14744	2.22257	2.31558	2.63244
DNA2	1.52298	0.00029507	0.005487	6.12769	4.60472	5.87305	5.60366	6.11106	6.60723	5.76552	7.13338	5.80306	6.1426	6.49465	5.74272	4.13671	5.08758	4.44732	7.4837	4.32196	4.03132	3.96696	4.08195	4.6063	3.88336
DNAJA3	0.720422	0.00211583	0.0219042	7.94848	7.22806	7.57229	8.37544	7.87942	8.11442	7.97514	7.88683	7.68347	7.88174	8.03288	8.08317	7.38511	7.49076	7.6895	5.55356	7.15392	7.21962	7.46846	7.33093	7.8252	7.16353
DNAJB11	0.704194	0.0100074	0.065283	6.99024	6.28605	8.12084	7.53427	6.18792	6.76685	6.70643	6.11539	7.22239	6.65516	7.25615	7.33699	6.57325	7.37173	6.09591	5.2772	6.46248	6.03413	6.06387	6.59468	6.13797	6.24923
DNAJC15	1.9168	0.000549719	0.00851332	9.60355	7.68675	8.53013	9.46457	10.8782	9.3646	10.5001	9.73039	10.7295	10.0734	6.72814	10.0366	7.95258	7.36249	9.02126	5.29645	8.5981	8.21863	7.30834	7.87942	7.39372	7.83654
DNAJC9	0.94463	0.00983798	0.0645563	7.25413	6.3095	6.69928	7.44641	7.4623	8.35187	6.96634	7.20493	6.01534	7.24039	8.28614	6.86827	5.47458	7.27623	6.63128	4.28526	6.16987	6.27054	6.59263	6.733	6.99825	6.66332
DNM1L	1.1019	0.0264424	0.126497	6.64833	5.54644	9.1599	6.33936	6.28268	6.47343	4.5097	6.84243	7.09689	8.23041	6.30283	5.2457	5.8616	6.13623	5.71331	3.68876	5.94407	5.42832	4.62699	6.39042	5.8955	5.77916
DNMT1	0.713869	0.0166017	0.0922684	8.06294	7.34907	8.10776	7.84537	7.71371	9.20643	8.45191	7.82871	9.02126	7.29909	7.05199	8.10321	7.25153	7.39452	7.09839	8.58753	6.1343	7.38453	7.35004	7.4353	7.17882	7.67578
DNMT3A	1.34687	1.69457e-05	0.000680735	6.8839	5.53703	6.35864	5.8493	6.90385	8.11786	7.21962	5.9503	7.73219	7.11706	6.3581	7.23207	5.38134	5.0796	5.39367	5.68383	5.52863	5.29956	5.67135	6.03262	5.87305	5.42666
DNMT3B	0.869188	0.000337583	0.00605607	5.92303	5.05384	6.9123	5.70893	5.99838	6.15454	5.61552	6.12812	5.89606	6.10567	5.4127	5.29811	4.47051	4.74037	4.72624	6.14682	5.07309	4.90203	5.28509	4.82183	5.40397	4.96848
DOCK3	1.43899	0.000160402	0.00351109	4.22298	2.78399	5.37562	5.06497	4.94427	3.69085	4.34043	3.13048	2.65249	4.9842	4.78971	3.25675	2.82515	3.28258	2.57929	2.2632	2.36671	3.21071	2.2884	3.07842	3.26973	2.6757
DPH2	0.940047	0.00509	0.0412673	6.56024	5.62019	7.5152	6.78261	6.89915	5.79972	6.87202	6.52272	6.72938	6.36628	6.28268	5.83263	5.62247	5.08546	5.3358	7.9129	5.79668	5.08919	5.17627	5.08982	5.2625	5.83082
DPM3	0.868676	0.0129418	0.0778343	7.84315	6.97447	8.17648	7.18549	8.02301	8.38048	8.71221	8.10581	8.44562	7.27499	6.33657	7.79084	7.14964	7.25615	7.15677	4.8351	6.97242	7.31955	7.63632	7.53692	7.03511	6.84675
DPP3	0.96886	5.34686e-06	0.000281517	5.86187	4.89301	5.77528	6.41943	6.1343	5.70287	6.09539	6.00395	5.74803	5.77961	5.63857	5.32123	5.45409	5.4459	5.20564	4.73758	4.93943	4.63678	4.20742	4.55547	4.97966	4.76808
DPY19L4	0.830691	0.0481583	0.189565	6.12359	5.2929	5.64259	6.5875	6.16221	6.9978	6.59263	6.36246	6.0288	5.72809	6.25706	4.87682	5.24744	6.07608	6.22187	2.06194	6.06268	5.35991	5.29843	5.49881	5.44452	5.65735
DRAP1	0.78175	0.00241898	0.0242207	4.11884	3.33709	4.75851	5.39287	3.95239	3.82066	4.20215	3.88167	4.2245	3.24172	3.57389	4.14002	3.6895	3.64514	2.75371	2.69485	3.88389	3.0791	3.39235	3.00138	3.43957	3.79139
DROSHA	1.01405	0.00363615	0.0320659	10.9439	9.92982	11.3932	9.82113	10.8948	11.4207	10.804	10.7405	11.222	11.3932	10.5546	11.1945	10.4913	9.90138	9.97143	7.53001	10.6906	9.84896	9.99938	10.2471	10.697	9.92089
DSC2	1.96832	1.97214e-05	0.00075362	6.67893	4.7106	5.32954	5.8294	7.10102	7.6904	8.93216	6.70868	7.02697	6.04599	6.10944	6.01567	5.18078	4.36243	5.68029	4.072	5.00023	5.00694	4.75348	4.25132	4.97546	3.82311
DSC3	0.757199	0.0457229	0.182849	3.81015	3.05295	3.93011	2.57698	3.71851	4.85664	6.0552	4.76433	2.88255	3.06898	3.78645	2.46174	2.5667	2.62385	2.84966	3.61939	3.18083	3.42604	2.93011	3.04343	3.3215	2.96799
DSCC1	0.780826	0.00201806	0.0212731	5.69996	4.91913	5.65562	6.17653	5.80104	5.85747	6.30145	6.07698	5.58463	5.0052	5.56177	4.97887	4.7048	4.76808	4.51369	6.18746	5.6332	4.35396	4.49403	4.95467	4.67395	4.90745
DTL	2.30221	5.50797e-11	8.9109e-08	5.50547	3.20326	5.78838	5.75376	5.56026	5.19197	5.50342	5.65862	5.53453	5.00307	6.26117	4.79954	2.705	4.24487	3.31516	3.20893	3.06662	2.98507	2.93297	2.94947	3.05643	3.5681
DTX4	0.717295	0.0156756	0.0887996	8.21832	7.50103	8.27867	7.62943	7.40591	7.39777	7.55224	9.27421	9.27948	8.30772	8.47327	8.58455	7.00941	7.3535	7.53195	8.82588	7.8658	7.15908	7.29077	7.40186	7.71371	6.85834
DTYMK	0.64845	0.000158812	0.00350892	4.31867	3.67022	4.66538	4.2898	4.35441	4.70868	4.58482	3.74486	4.36085	3.60417	4.78621	4.08748	3.2542	3.77608	3.79916	3.72315	3.69725	3.69699	3.67129	3.74673	3.60102	3.73629
DUSP12	0.889297	0.00945917	0.0631179	6.40567	5.51637	6.21173	6.39376	6.77557	7.27073	6.63981	6.43352	5.64893	6.66509	6.58426	5.43328	5.34737	6.43914	6.11037	3.23979	5.08096	5.60417	6.07587	5.77833	5.67554	5.81216
DUSP9	0.662628	0.0102893	0.0663717	5.06853	4.4059	5.87869	4.2318	4.31136	5.61393	4.57491	6.14712	4.66646	5.38909	4.95772	4.91425	4.68546	3.97278	4.52909	5.03969	4.0771	4.55189	3.87012	4.04924	4.43241	4.85126
DVL1	0.692177	0.0260138	0.125112	6.96691	6.27473	7.54916	6.31648	7.08253	6.81867	6.93888	6.71466	7.71371	7.69595	5.10208	7.73699	6.3414	5.60579	5.24963	6.356	6.84035	6.30348	6.19301	6.70172	6.77939	6.37657
DYNC1I2	0.926713	0.0268958	0.128092	9.15111	8.22439	9.73453	9.75414	9.1083	9.11188	9.20643	9.07901	8.80334	8.95028	9.05096	8.71221	8.60457	8.78151	8.814	4.66354	8.40594	8.69228	8.48548	8.72977	8.33116	8.73568
DYSF	0.729782	0.000590503	0.00897403	4.84506	4.11528	4.62389	4.69848	4.36825	5.33472	4.44682	4.51691	5.54944	5.88283	4.48781	4.54148	4.18897	4.31459	4.15944	4.16694	3.91875	3.65828	4.35795	3.99553	4.10046	4.29191
E2F1	0.653911	0.00424585	0.035861	6.19787	5.54396	5.9058	6.19043	5.74249	6.18062	6.62588	6.31299	6.11585	6.05935	6.43976	6.40553	5.64142	5.36096	5.26289	7.21514	5.54067	5.21566	5.13486	5.23938	5.37951	5.4491
E2F3	0.778791	0.046212	0.184227	8.66311	7.88432	8.04392	8.36438	8.97227	8.64419	10.5378	7.82415	9.13579	8.80543	7.19986	9.10335	8.39242	7.06314	7.12912	9.65745	7.98124	7.06517	7.06879	7.99214	8.41178	8.08199
E2F8	1.94172	0.000951035	0.0126021	5.93598	3.99426	4.74348	6.21455	6.30145	5.86093	6.25296	5.82612	5.81249	5.62103	8.56234	4.16446	1.87508	5.12671	4.11552	2.303	4.77646	5.46588	5.13006	4.0771	4.30199	2.77077
EBP	1.24186	1.08621e-05	0.000485684	6.95659	5.71473	6.76614	6.57356	7.27281	7.26404	6.75849	7.30269	7.62202	6.62334	7.67997	5.70287	5.29562	6.30383	5.99044	6.1426	5.48842	5.65933	5.12979	5.48984	5.96659	5.68083
ECD	0.590979	0.00348632	0.0312715	5.62456	5.03359	5.30712	5.33024	5.32596	6.00062	5.19901	5.8066	5.74803	5.32875	5.88632	6.31299	5.43141	4.87509	4.88576	5.36853	5.42256	5.10586	5.09547	4.69764	4.05394	5.3996
ECHDC3	0.71591	0.0285592	0.133537	6.14788	5.43197	6.97767	6.00109	6.01162	5.11787	6.17028	6.31351	5.6268	6.89321	5.73737	6.62942	4.76808	5.34601	5.29166	7.56734	5.34896	5.27255	4.91539	4.54942	5.76452	5.4958
ECHS1	0.721807	0.0012426	0.0150534	9.55869	8.83688	8.97012	10.4421	9.28475	9.69814	10.2322	8.72061	9.52786	9.37576	9.75848	9.5768	8.3435	9.37576	8.91026	8.42819	8.95812	8.82588	8.57393	8.93894	8.69523	9.319
ECI1	0.608016	0.0403649	0.168351	7.21487	6.60685	6.00346	8.35591	7.40591	7.49076	7.5254	6.21859	6.73852	7.81184	6.98631	7.61197	6.75439	6.81016	7.03662	5.19365	6.91016	6.98288	6.40767	6.76855	6.1752	7.02922
ECT2	2.65329	3.51876e-05	0.00115963	7.85928	5.206	8.33116	8.0929	7.23586	8.9059	7.73603	8.5286	6.75612	7.4963	9.6335	5.87644	5.93769	7.13287	6.35559	2.80921	3.42795	5.23326	6.1848	4.64893	5.17085	5.15879
EFEMP2	1.51074	4.75239e-05	0.00145066	7.49118	5.98044	8.45425	7.12114	7.27934	7.48598	7.8252	7.14964	8.45066	7.04092	6.35559	7.74908	6.70918	5.46621	6.0516	4.51104	6.33779	6.05231	5.70654	5.3945	6.56173	7.01347
EFNA3	0.757958	0.00063021	0.00938512	5.35044	4.59248	5.08655	4.89024	5.74082	4.70396	5.38212	5.73393	5.7726	4.82655	5.0241	6.3435	4.44902	4.12039	4.36502	4.67534	4.63977	4.85531	5.02608	4.81105	4.75707	4.22574
EFNA4	2.14982	4.22253e-10	3.95496e-07	6.03819	3.88837	6.93102	5.87079	5.79552	6.36628	6.07849	5.95801	5.76818	5.97691	5.92595	5.7108	3.24733	4.02151	3.73714	2.85913	4.41558	4.10438	3.97225	4.10438	4.62098	3.80101
EHD3	0.652902	0.0296313	0.136611	5.8468	5.1939	5.86989	5.3217	5.69531	6.4683	4.77927	7.15616	5.73368	5.30471	5.88452	6.2545	5.43622	5.6694	5.67793	3.92546	4.97357	5.20564	4.83694	5.36134	4.61814	6.23439
EIF2S2	0.591501	0.00723439	0.0525054	7.29573	6.70423	6.62276	7.10076	7.05014	7.4563	6.87422	7.69617	8.05249	7.25689	8.02672	6.82084	6.93754	7.31403	7.00092	5.86627	6.66276	6.83382	6.39042	6.5875	6.47419	6.97484
EIF3K	0.702839	0.00396269	0.0341171	8.57033	7.86749	7.31955	8.21617	8.26148	8.73902	8.61209	8.29867	9.75414	9.0974	8.68226	8.72252	7.97514	8.0258	8.09143	7.51292	7.82415	7.69241	7.87372	7.58997	7.53091	8.55845
EIF4E2	0.654987	0.000921543	0.0123121	6.32365	5.66866	6.66195	6.3815	6.57713	6.29088	6.2127	6.25773	6.2309	5.41515	6.46636	6.7422	5.57858	5.94947	6.02827	6.0796	5.40852	5.94057	5.52364	5.18107	4.98034	6.01656
EIF4EBP1	0.850596	0.00932187	0.0626481	4.85299	4.0024	6.81626	5.07686	4.01342	4.74372	5.23707	4.91425	5.33352	3.5414	4.5188	4.33462	4.37379	3.64063	3.89725	4.24421	4.35857	3.85054	4.29754	3.53255	3.24899	4.5799
EIF4G1	0.634028	0.00620672	0.047042	7.08595	6.45192	7.86112	7.52407	6.47071	7.12271	7.58436	5.87526	7.58918	6.92554	7.25757	6.64892	6.6848	6.56871	6.3581	6.78052	6.51563	6.47071	5.86201	6.08217	6.48277	6.71375
EIF6	1.14785	0.000160928	0.00351828	6.91222	5.76437	7.63994	8.09978	6.38391	6.80617	6.89836	6.1737	7.34072	6.69548	6.47129	6.61287	6.13291	6.1958	6.19902	4.31248	5.91548	6.02709	5.84235	5.42666	5.83082	5.76113
ELMO1	0.595707	0.00924581	0.0624117	3.36625	2.77054	2.75963	3.19112	4.03527	2.71762	3.08449	4.18451	2.84262	3.45322	4.42158	2.97244	2.65728	3.13885	2.67464	2.76875	2.37182	2.59581	3.1546	2.70794	2.94664	2.6891
ELOVL1	0.7797	0.00423784	0.0358104	5.07764	4.29794	5.86201	6.12875	4.8731	4.38969	5.63036	5.86656	4.30033	4.0732	4.88125	4.77113	3.76552	4.52772	3.91416	4.34088	4.01582	4.76163	4.34181	4.44599	4.50828	4.35756
ELOVL6	0.922007	0.00259353	0.0253318	5.50424	4.58223	5.24227	6.10086	5.73841	5.54393	5.0022	6.74629	4.51691	5.3902	6.33094	4.43034	3.9688	5.3996	5.17766	4.43315	4.06339	4.15435	4.68846	4.46021	4.9998	4.47686
EMG1	0.911302	0.00444095	0.037069	7.33535	6.42405	7.19845	8.285	7.44641	7.27008	6.45433	6.42499	7.46623	8.17763	7.17882	7.45156	6.43401	6.81738	6.89412	4.47179	6.66872	6.4175	7.04189	6.39867	6.27001	6.8264
ENC1	1.60324	1.04127e-05	0.000467941	7.1345	5.53126	6.61427	5.86201	8.0665	7.27934	6.59063	6.76127	8.41178	7.7741	7.64729	6.33779	5.49946	5.98596	5.99087	5.76625	5.4241	5.01377	4.75373	5.81668	5.32408	5.73769
ENO2	1.45242	0.00224214	0.0229159	6.3845	4.93208	7.50194	4.97709	5.98504	6.98874	4.20215	6.22911	6.66724	8.5222	7.26059	5.51091	4.76511	5.42201	4.90146	4.89455	4.81972	5.68223	3.89444	5.64716	5.11507	4.17904
ENO3	0.723863	0.0159909	0.0898277	5.83736	5.1135	6.01942	5.81179	6.30557	5.71121	6.30189	5.26466	6.09591	6.6705	4.48411	5.70855	5.76625	4.96931	4.69436	3.69027	5.63023	4.361	5.34334	5.56026	5.58055	5.5394
ENTPD6	0.683139	0.0167796	0.0928512	8.78832	8.10518	9.9098	7.14197	8.37174	8.73768	8.58597	8.55157	9.5768	9.27421	8.48396	9.24953	8.08765	7.81252	7.9326	8.98043	8.35591	7.91654	7.81656	7.90103	8.50847	7.74014
ENY2	0.721045	0.0041955	0.0355538	8.4284	7.70735	7.70138	9.69326	8.2441	8.74718	9.05949	8.89251	8.18376	7.92582	8.37174	7.46471	7.5254	7.99024	7.92177	8.09643	7.71935	7.29166	7.98814	7.49261	7.35549	7.69241
EPB41L1	0.735172	0.0104573	0.0670381	4.76647	4.03129	5.20814	4.66386	4.93088	4.03726	4.85638	4.28824	5.91264	4.72193	4.31136	4.73399	3.78561	4.05394	4.05723	2.76085	4.98034	4.35441	3.28073	4.77834	4.56632	3.69517
EPHA4	0.980509	0.0374487	0.160781	6.09075	5.11024	4.40462	5.68605	6.50816	6.73349	5.9834	6.06157	7.923	5.0114	7.86869	4.7271	4.48659	4.7971	4.35519	6.56043	6.61356	4.96477	4.17531	4.69061	4.88344	5.5754
EPHB2	1.13631	4.58192e-06	0.000254812	5.54196	4.40564	6.00683	5.06144	5.65618	6.20788	4.92852	5.40484	5.89674	5.61056	5.7856	4.86097	4.04689	4.45444	4.32506	5.2377	4.47623	3.93653	4.11748	4.32703	4.71492	4.42014
EPHB3	1.01217	1.58474e-05	0.000646836	6.10159	5.08942	6.91443	5.04591	6.18356	6.60256	5.96504	6.60723	5.85168	5.71362	6.0331	6.09881	5.55744	4.9525	4.9776	4.91495	5.19467	4.96235	4.70592	5.13458	5.20153	5.2927
EPPK1	0.773664	0.00812903	0.0570218	6.96556	6.19189	6.75925	7.33569	7.26126	5.76016	6.7548	6.86296	7.19519	6.94236	8.0045	6.77939	6.76614	4.65587	6.24388	6.36075	5.64232	7.05499	6.54292	6.2545	6.37728	6.02027
EPT1	0.618088	0.00577616	0.0446535	5.27521	4.65712	5.19072	4.24197	5.28955	5.45513	5.55267	5.78714	4.35857	5.71121	5.81668	5.34848	4.55547	4.9215	4.44682	4.35519	5.12671	4.14731	5.16837	4.64855	4.40272	4.7986
ERCC6	0.720851	0.00203266	0.0213429	4.64926	3.92841	4.30049	4.116	4.17584	4.19345	5.1627	4.08012	5.13866	4.95014	4.57304	5.80219	4.15196	3.74732	3.44726	4.14954	3.85028	4.20432	4.32761	3.94729	4.04036	3.41818
ERCC6L	0.862333	0.000345317	0.00614527	4.05529	3.19296	4.21687	4.33924	3.42177	4.74752	4.13025	4.71475	3.56874	3.90803	4.49196	3.01374	3.51836	3.36279	3.02816	3.60457	3.25535	3.15169	3.55205	2.89189	2.74815	2.81654
ESM1	1.25203	0.00314544	0.0290635	3.47593	2.2239	4.68546	6.10804	2.65897	3.4495	2.87962	2.18846	3.43167	3.00102	3.84827	2.50824	1.74739	2.36607	3.1088	2.17495	1.62389	2.27171	2.71425	2.36157	2.14629	1.72406
ESPL1	2.33509	2.9301e-07	3.86252e-05	7.87719	5.54211	8.89645	7.43722	7.78699	7.93663	7.52926	8.68707	7.93756	8.62325	7.32465	6.61287	5.04089	5.9211	5.35991	7.61071	5.51127	5.14414	4.83243	5.40217	5.30135	5.29709
ESRP1	1.47929	2.80845e-05	0.000978065	6.86302	5.38373	6.15174	7.58159	5.89247	7.20058	7.80473	7.27695	6.25608	6.81474	7.04153	6.60974	4.88576	6.13496	5.65205	4.39487	4.93201	6.00109	6.47882	5.4311	5.08007	4.84655
ESRP2	0.858053	0.00336427	0.030522	7.76796	6.90991	7.41232	8.08075	6.95765	7.48446	8.76332	7.83233	8.53738	7.87853	6.63727	8.09561	7.39556	7.02739	6.79844	5.53558	7.25615	7.11597	6.64209	7.36556	7.1685	6.79387
EVPL	0.643183	0.0064805	0.0483348	5.5261	4.88292	5.66722	5.46726	4.60245	5.96151	5.40068	6.19301	6.56124	4.8894	4.89743	5.62079	4.65727	4.65826	4.6889	5.59938	4.93408	4.54852	5.16322	4.67076	5.02977	4.87901
EXO1	0.937464	1.13201e-05	0.000499884	3.91129	2.97382	4.44611	4.26618	3.88712	3.46719	3.72484	3.69646	3.71086	3.55951	4.44682	3.90778	2.71797	3.22104	3.04534	3.46396	2.28258	3.1064	2.9438	3.08158	2.50485	3.37069
EXOC2	0.968793	0.000723626	0.0103435	4.52569	3.55689	4.32945	4.93124	4.00705	4.67961	4.93408	3.95292	5.36933	3.55447	5.10133	4.39739	3.16451	3.58065	4.09566	2.2632	3.4495	3.78037	4.20842	3.73336	3.96564	3.32763
EXOSC3	0.602503	0.00974146	0.064207	3.8398	3.2373	3.88616	5.30177	3.8721	4.34648	3.43088	3.41083	3.32824	3.79846	3.83981	3.18331	3.4461	3.5596	3.70794	2.93591	3.06237	3.19065	2.99327	3.26012	3.46396	2.75308
EXOSC4	1.16892	0.000963787	0.0126893	6.62681	5.45789	6.74012	8.6223	6.85597	5.71545	6.89245	6.84884	6.14552	5.97895	5.91138	6.5571	5.0916	5.58951	5.48752	6.70806	5.7108	5.02444	4.39658	5.56847	5.50612	5.4958
EXOSC5	0.855273	0.00464706	0.0383933	6.34103	5.48576	7.07902	6.78975	6.9405	6.09204	6.34256	5.84798	6.39106	6.63727	5.97212	5.31799	5.15592	5.33622	5.37011	7.15053	5.44061	4.57939	4.88344	5.18033	5.81411	5.9469
EXT1	0.623127	0.027508	0.130056	6.42268	5.79955	5.57157	6.72095	6.61383	6.07446	7.94966	5.13107	6.68439	5.92812	6.86208	6.69064	5.79923	5.98995	6.15238	4.88369	5.87172	6.0826	5.79624	5.46383	5.93689	6.01896
EZH2	3.47114	8.61773e-10	6.44125e-07	8.37582	4.90469	8.88149	8.78033	8.52932	8.40898	8.44752	8.94595	8.10861	7.94679	8.01092	7.69832	4.42981	6.0488	5.33024	3.08362	5.80775	5.06608	3.37741	5.82058	4.67091	5.4117
F8A1	0.714502	0.0290634	0.134901	7.51346	6.79895	7.66514	8.82416	7.43624	7.50239	6.66979	8.24841	7.22385	7.04444	6.8206	7.69954	6.72375	7.02739	7.22509	4.72844	6.83819	7.66322	6.88192	7.10236	6.69467	7.10452
FABP5	2.42557	1.03034e-06	8.97816e-05	8.58851	6.16294	8.30009	8.68909	8.5222	9.70497	8.81204	7.64382	8.87182	8.20803	9.49414	7.63892	6.59769	5.31575	5.79157	8.47512	6.37777	5.2073	5.55267	5.34033	6.39074	6.58043
FADS1	0.872846	0.00318084	0.0292993	6.52164	5.64879	7.22585	6.36104	5.09731	6.0488	6.94546	6.85409	6.95033	6.1741	6.70172	6.85772	5.80818	5.28383	5.34356	6.93813	5.04741	5.10984	5.2772	5.52297	5.79972	6.35711
FADS2	0.759049	1.78642e-05	0.000709625	5.08196	4.32291	5.27699	5.16837	4.75214	4.79468	5.19876	4.95698	5.25842	5.17302	4.88708	5.35317	4.28801	4.46872	4.09273	4.80867	4.03496	3.66322	4.17966	4.43461	4.85553	4.403
FAM117B	0.723043	8.81776e-05	0.00226437	4.0948	3.37176	4.55759	3.81803	3.87379	3.83347	4.89989	3.63098	3.84602	4.39118	3.92174	4.17531	3.3126	3.216	3.77922	3.08921	3.51905	3.21425	3.42937	3.47653	3.08309	3.59827
FAM127A	0.845605	0.000615162	0.00920725	8.31134	7.46573	8.84157	8.26472	7.81184	8.63602	8.22597	9.04674	8.45928	7.68678	7.14037	9.00012	7.39107	7.61197	7.30634	7.35837	7.46144	7.393	6.83188	7.68252	7.8404	7.78036
FAM127B	0.998298	0.000142122	0.00319748	5.14529	4.14699	5.40254	5.55187	4.79263	5.33252	4.91895	5.39264	4.96184	4.45444	4.61372	6.03175	4.39973	4.52525	4.38329	2.78847	4.19944	4.53354	4.26712	3.94014	4.30565	4.12727
FAM162A	0.81928	3.43628e-06	0.000205208	7.05468	6.2354	6.49695	6.87369	7.03816	7.22902	7.26659	6.96956	7.16227	6.84413	7.41424	7.25216	6.35711	6.31721	6.2842	6.80644	5.81668	6.15327	5.83916	6.30899	6.08217	6.38874
FAM168A	0.698018	0.000328119	0.00593415	5.744	5.04598	5.36252	5.67827	6.30654	5.44238	5.39796	6.16441	5.79024	5.99087	5.47893	5.82785	5.3052	5.39752	5.48268	4.40441	5.0916	4.62584	4.55145	4.9751	5.26466	5.36134
FAM171A1	0.741445	0.00425515	0.0359225	9.44012	8.69868	9.20397	9.3646	10.0221	9.27645	9.53223	8.25506	9.59149	9.7704	9.15275	10.2322	8.84959	9.13034	9.01803	7.57888	8.98644	8.17918	8.26269	8.86986	9.28271	8.82908
FAM173A	0.831596	0.00457295	0.0379041	5.40931	4.57772	5.53598	5.89005	5.45621	6.13685	5.87215	3.95292	5.2503	5.00384	5.49881	5.496	4.37916	4.94645	5.08007	3.26973	5.16768	4.90146	4.69708	4.50535	3.79451	5.03566
FAM195A	1.25392	0.00127512	0.0153325	7.05894	5.80502	6.89622	8.33406	6.73907	6.3212	8.42221	6.69214	6.23439	8.22597	5.78663	6.93754	5.5883	5.54393	5.63178	7.4963	5.7108	5.37978	5.5394	5.48752	5.59722	6.07519
FAM32A	0.818358	3.50514e-06	0.00020862	7.53802	6.71966	7.89734	7.57229	7.1724	7.22416	7.76013	7.57658	7.80057	7.76042	7.55708	7.05926	6.50563	6.82713	7.14197	6.47488	6.41253	6.83669	7.08325	6.49524	6.55849	6.86083
FAM50A	0.937445	0.00421923	0.0356846	7.33157	6.39413	8.67079	8.65555	6.42766	7.55418	6.72521	7.94062	6.77358	7.03816	6.8635	6.66647	7.0542	6.10215	6.2181	5.70229	7.19023	6.25296	5.77172	6.55454	6.2842	6.81088
FAM60A	0.938484	0.00435412	0.0365472	7.64277	6.70429	7.81656	8.31087	7.38391	7.11777	7.1842	7.10102	8.27169	8.19759	7.07284	7.97125	7.34916	6.76385	7.19913	4.5097	6.8891	7.03881	6.99519	6.7119	6.34395	7.24208
FAM64A	1.31998	5.89087e-05	0.00169087	5.6642	4.34422	5.75476	5.61601	5.30028	6.47182	6.05021	5.33544	6.30787	5.61236	5.86889	4.32431	4.9408	3.92546	3.76316	3.2266	5.24948	4.53627	4.47179	4.98516	3.9961	4.34735
FAM90A1	0.63512	0.0078289	0.0553969	4.98168	4.34656	5.26965	4.94601	4.87055	4.67076	5.17415	5.07915	4.87858	5.24403	4.4129	5.27099	4.21323	4.48257	4.41586	3.48566	4.19913	3.58338	5.22478	4.09615	5.56951	4.1953
FANCA	0.702289	0.000721883	0.0103269	4.77455	4.07226	5.00091	5.06042	4.73595	4.74013	4.73146	4.41329	4.78482	4.68401	4.90974	4.68476	3.90562	3.72091	4.24197	5.4491	4.08368	3.95263	4.2066	3.55595	3.62907	3.97708
FANCE	0.737362	0.0109894	0.0694486	5.25961	4.52224	5.46304	5.44779	5.24079	4.63562	5.35728	4.5387	6.03059	4.83137	5.18699	5.86386	3.68086	4.34976	3.85918	6.08157	4.64929	3.81954	4.89368	4.3147	4.40009	5.17377
FANCG	0.957975	5.95128e-05	0.00170272	6.97213	6.01416	7.12114	7.24918	6.35672	7.16887	7.61324	6.94725	7.14886	7.34226	6.5061	6.26773	6.5298	5.94187	6.21662	4.96431	6.14913	5.81505	6.09441	6.0516	6.36858	6.01022
FANCI	1.65487	3.82532e-10	3.78197e-07	5.96623	4.31136	6.29536	5.8396	5.92951	6.02671	6.29619	6.18427	5.96453	5.78272	5.31394	6.02946	3.60196	4.43095	4.5441	4.85744	4.09615	4.18715	4.74858	4.36698	4.26052	4.0198
FASTK	0.586732	0.00187822	0.0202207	7.25201	6.66528	7.67997	7.07902	6.91716	7.0658	7.77987	7.69388	6.94001	6.87861	6.70986	7.77591	6.73474	6.4572	6.27811	7.34496	6.73585	6.56935	6.43039	6.63018	6.91075	6.56124
FASTKD1	1.30926	0.00166851	0.0185924	8.87954	7.57028	9.16176	8.67238	9.51676	7.97985	9.15097	8.73399	8.88873	9.35967	8.52417	8.8071	8.44322	7.74908	7.94898	4.60833	8.45364	7.30913	7.71371	8.28557	8.07408	7.11706
FASTKD2	0.741213	0.00949808	0.0633126	5.3427	4.60149	5.47547	5.39367	6.03215	4.02344	5.57655	5.15657	4.68713	5.27841	5.99187	5.81179	5.09918	5.20362	4.6686	3.31353	4.32381	4.54314	3.98529	4.79512	4.85497	5.22765
FASTKD5	0.924525	0.00251761	0.0248632	6.90416	5.97964	6.18746	6.90135	6.29311	7.06314	7.20787	6.54746	7.24398	6.70742	7.80662	7.08325	5.87905	6.51077	5.93956	4.10363	6.05213	6.19755	6.40811	5.5385	6.40394	6.76316
FBLN2	0.946865	0.00647925	0.0483348	4.8023	3.85543	6.1338	3.51508	4.38837	6.25706	3.62627	4.24233	5.29198	4.71229	4.72735	5.12846	4.22376	3.813	3.62725	4.97709	4.04192	3.65464	3.72037	3.56206	3.2192	3.71506
FBXL6	0.892134	0.0075715	0.0540483	4.38534	3.49321	4.27836	6.94485	4.08077	3.58803	3.88934	4.5853	4.47742	3.928	4.25793	3.8234	4.0103	3.52775	2.75308	3.70773	3.53255	3.6133	3.4406	3.26403	3.67816	3.40457
FBXO17	0.994861	0.0410171	0.170059	6.2185	5.22364	7.70239	4.27919	4.33175	5.64819	7.09618	6.83188	6.45305	8.0321	5.19302	6.61728	5.04942	5.13107	4.36034	7.33644	5.03443	4.89842	5.1103	5.02578	4.71913	5.57108
FBXO2	1.24341	0.0145222	0.0844291	6.2087	4.96528	8.67238	4.07859	6.03117	5.98785	4.69731	6.04393	7.77869	5.45997	6.59365	6.74341	4.69119	4.16758	4.9364	3.60673	5.35784	6.57198	5.02639	4.68713	5.65062	4.95698
FBXO41	0.784403	0.000179247	0.00381565	3.89009	3.10569	4.71654	4.10021	3.47653	3.7115	3.61785	3.69241	3.60417	4.774	3.51647	3.69127	3.51647	3.06824	3.25853	2.60479	3.25535	2.97158	2.88734	2.94088	3.3316	3.22214
FBXO46	0.716622	0.0157956	0.0891518	8.08588	7.36926	8.16716	7.26126	8.47697	8.56816	9.31262	6.93646	7.43107	8.66296	7.38662	8.65555	7.45786	7.18159	7.28517	6.55019	7.64813	7.13236	7.0542	7.73219	8.2658	7.38511
FBXO5	0.877947	0.0454508	0.182254	4.51881	3.64086	3.98247	5.12825	4.32911	4.64818	4.7841	4.47014	3.60711	4.65336	6.93784	2.64754	3.29713	4.63602	3.86053	1.66136	3.40399	3.44498	4.4676	3.63633	4.36435	3.63633
FDPS	1.50881	0.000665534	0.00974157	9.07164	7.56282	10.1383	10.1436	9.1741	8.76332	9.26242	8.88149	8.71221	8.61209	8.42427	8.60457	8.20514	8.22711	7.88502	4.51369	8.07536	7.43357	7.49222	7.70722	7.94178	8.14711
FEN1	1.04014	2.0089e-07	2.95458e-05	5.97971	4.93958	5.69341	6.40553	5.95152	5.79257	6.49968	5.96072	5.72031	6.19662	6.05487	5.52189	4.72886	5.32458	4.91182	4.52424	4.80724	4.7029	5.19197	4.93757	5.34287	4.92373
FGD1	0.616351	0.00668247	0.0494681	4.57063	3.95428	5.19555	4.21247	4.22703	4.84869	5.71252	4.2095	4.51925	4.86097	3.71419	4.20617	3.99434	3.73629	4.25905	3.25242	4.13582	4.00062	4.07354	3.85534	4.36674	3.86867
FGF18	0.878562	0.00682679	0.0501816	5.2691	4.39054	5.99952	5.57331	4.99597	5.76067	4.11552	5.14062	6.5638	4.33954	4.13896	6.06313	4.85299	3.71745	4.40272	3.84889	5.10338	4.0127	4.52424	4.17712	4.69848	4.56746
FGF9	1.93687	0.00225955	0.023004	9.01447	7.0776	9.09942	8.38731	9.19888	9.99341	7.9592	8.20514	11.4839	8.6906	6.91993	10.2069	6.87139	6.32021	7.05091	10.0174	7.71706	4.61692	7.04328	6.60522	7.88062	6.65293
FHOD1	0.644777	0.00935044	0.0627444	5.91818	5.27341	6.32822	6.64842	5.46588	5.30996	5.82651	5.82439	6.14594	6.55849	5.18215	5.89188	5.42781	4.80724	4.68713	6.52514	5.17325	4.68449	5.50575	5.2591	5.2178	5.44636
FIBP	0.764542	0.000837687	0.0114497	7.22726	6.46272	7.41564	8.49399	7.2268	6.75399	6.84413	6.92141	7.60648	6.47797	7.15985	7.37239	6.061	6.40106	6.64016	7.06245	6.2052	6.48277	6.40235	6.16713	6.71998	6.48512
FIGN	0.601605	0.0132967	0.0792352	3.94386	3.34226	3.63119	3.667	3.78583	3.87012	4.41933	4.25581	4.34764	4.13093	3.46992	3.86085	3.13109	3.21233	2.42317	4.8665	3.41279	3.30572	3.56482	3.69839	2.96026	2.8475
FIGNL1	0.829506	0.00359368	0.0318419	4.48623	3.65672	3.56674	5.24301	4.54173	4.8607	4.62771	4.37216	3.84827	4.55515	4.9448	4.30199	2.84026	4.2175	4.12412	2.12755	4.0386	3.81597	3.91614	3.96696	4.01422	3.50587
FJX1	1.25129	7.26103e-05	0.00194398	6.78874	5.53745	6.88503	7.33314	5.76361	7.06879	7.59602	6.8088	7.03396	6.07163	6.48013	6.84627	6.34024	5.91898	5.89266	4.2038	5.48125	5.62037	5.05911	4.98388	5.85581	6.01839
FKBP1A	0.784166	3.01436e-05	0.00102963	5.74801	4.96384	5.21048	5.51091	6.01439	6.06668	5.82503	5.23326	5.74336	5.64819	5.91368	6.31406	4.8268	5.25967	5.38644	4.6686	4.73811	5.127	5.3177	4.84804	4.58563	4.88039
FKBP9	0.608237	0.00344779	0.0310926	8.7354	8.12716	8.88675	8.35468	8.53233	9.01321	8.84959	9.52043	8.56031	8.24282	8.66885	8.72501	7.8703	8.57268	8.61363	7.23207	7.89585	8.52932	8.34906	8.57268	7.79946	7.83654
FKBPL	0.836976	8.53891e-05	0.00221503	5.834	4.99703	6.14065	6.23375	5.98171	5.05812	6.38549	5.15517	6.05935	5.78933	5.59179	5.94471	5.06459	5.0711	5.48842	4.94375	4.68401	5.20964	4.30519	5.04573	5.22212	4.93575
FLAD1	0.90232	0.000104629	0.00255066	5.41811	4.51579	5.78972	5.93046	5.62781	5.71875	5.69207	4.87628	5.15551	5.1319	4.97475	5.28383	4.38255	4.43883	4.42502	5.75915	4.28385	4.68026	4.44136	3.98464	4.18009	4.58211
FLJ22184	1.42814	0.000662201	0.0097159	5.21928	3.79114	6.47071	4.81179	4.56087	4.6436	4.93698	4.66024	6.71509	3.84766	4.34218	7.20367	3.6915	3.34121	3.72914	4.4734	4.04114	3.63098	3.79316	3.42316	3.51777	4.26992
FLNA	0.841864	0.0293625	0.136006	6.2677	5.42584	8.07942	8.41544	5.50021	5.47593	5.84323	6.50434	5.64716	5.34695	5.32535	6.539	5.67431	5.31363	5.36933	6.16474	5.22013	4.8879	4.93563	5.20932	5.48505	5.99838
FN1	1.60009	0.000269869	0.00515299	6.43191	4.83182	6.70918	5.16193	6.61909	8.3953	4.70396	7.07284	6.48136	5.9277	7.25689	5.99087	5.69843	4.72806	4.88003	4.98558	4.90974	4.05424	4.46951	4.55128	4.07677	5.96453
FOLR3	0.85102	0.00397668	0.0342044	3.84469	2.99367	3.35348	3.2415	3.8654	3.31379	5.29024	4.43858	4.32883	3.27051	3.38923	3.95535	3.1119	2.81992	2.9069	4.43493	3.08628	2.7458	2.99413	2.43028	2.79324	2.61336
FOXF2	0.697016	0.0314501	0.142269	3.32054	2.62353	3.4906	3.09251	5.45259	2.63933	2.4051	3.16513	3.33079	4.398	2.54812	2.68324	3.41535	2.56327	2.66507	2.76791	2.43919	2.67496	2.51139	2.52979	2.59373	2.0746
FOXJ3	0.713971	0.00198483	0.021025	7.04281	6.32884	7.97637	6.83819	7.57559	5.80615	7.28431	7.2157	6.3815	7.26659	7.16657	6.91716	6.81228	6.35672	6.20834	6.17823	6.34642	5.98483	6.07113	6.29838	6.51921	6.51288
FOXM1	2.05603	1.85484e-07	2.84558e-05	5.61939	3.56336	6.40394	6.50516	5.33502	5.52527	5.641	4.54778	4.84292	6.52547	6.32195	4.54534	3.40004	4.02752	3.57158	4.29217	2.96778	3.18331	3.93556	3.40918	3.49912	3.3473
FOXRED1	0.782313	0.00656209	0.0487188	6.74164	5.95933	6.98078	6.53195	6.22283	6.26406	7.34161	6.8745	6.32459	6.67605	6.70742	7.49261	6.01656	5.67856	5.33943	7.9326	6.05213	5.75376	6.06558	5.4459	5.74182	5.56691
FRAT2	1.13421	0.000165809	0.00360285	6.53501	5.4008	5.98526	6.42711	6.82414	6.63059	7.25216	6.34099	6.47674	6.02495	6.67539	6.71273	4.24065	5.93894	5.82097	5.55861	4.73634	5.3217	6.75519	4.75638	5.7525	5.12671
FRZB	1.03559	0.00918224	0.0621971	3.7539	2.71831	3.15023	3.8621	3.31312	4.62734	2.58446	4.07741	3.10139	2.78991	6.64687	3.3862	2.29722	2.95991	2.76326	2.6658	3.01674	2.53826	2.65802	3.06237	2.64538	2.57614
FSCN1	1.32261	3.19423e-06	0.000194726	4.80232	3.47971	6.10477	4.47452	4.7271	5.29198	4.06018	4.10877	5.16543	4.55067	4.39042	5.1494	2.96242	3.62857	3.76552	3.29695	3.35922	3.32097	3.83044	3.76316	3.41619	3.45369
FTL	0.888082	0.00143498	0.0167017	9.84208	8.954	9.64848	10.1383	9.97602	10.1868	10.0613	10.0675	8.54535	9.42855	10.421	9.94755	8.59029	8.20946	9.05096	9.64848	8.75658	9.14124	8.82723	8.22711	8.97227	10.1163
FTSJ1	0.638093	0.00864751	0.0596246	5.45836	4.82027	5.98439	5.33396	5.49629	5.48752	4.63602	5.47748	6.78493	5.37853	5.36387	4.64061	4.42158	5.14196	4.90607	4.37439	5.16193	4.69061	4.95467	4.61372	4.44977	5.48798
FUNDC2	0.847818	0.000440268	0.00737759	8.26394	7.41612	8.6193	9.15097	8.07942	7.9326	7.86496	8.31087	7.8252	7.82124	8.65765	8.37718	7.71706	7.90884	7.81656	6.25557	7.73359	7.57067	7.5077	7.34161	7.03463	7.27499
FXYD6	1.13917	0.00968529	0.0640265	6.29664	5.15747	8.11234	5.58344	4.78946	6.55517	5.2212	5.38599	7.78913	6.68926	5.72531	7.11513	5.49164	4.98274	4.42981	5.73516	5.49881	4.22376	4.10107	5.41052	5.2772	6.42398
FZD10	1.87887	0.0048177	0.0394914	6.79581	4.91695	6.7548	5.10113	7.86264	7.85363	4.0816	5.5183	10.2069	7.39372	5.27255	7.9129	5.65826	5.29333	4.73563	2.85913	5.2178	4.1582	5.82058	5.11892	4.73811	5.56951
FZD2	1.27963	0.0129332	0.0778343	6.44933	5.1697	7.27358	5.39911	6.60125	7.70239	3.25585	5.31735	7.59783	7.9685	5.9058	7.47166	4.90315	5.04384	4.9668	5.07879	5.99273	3.94114	5.34069	5.49561	5.10113	5.83315
FZD4	0.885845	0.00572712	0.0444871	7.67987	6.79403	7.24623	5.92371	8.18499	7.10102	9.19713	8.35187	7.22902	7.34161	7.76593	8.45721	6.54821	7.19361	6.94725	6.47247	7.08774	6.54532	6.63461	7.11597	6.85834	6.53673
FZD5	1.00203	0.00190907	0.0203789	5.50821	4.50618	5.23797	5.97212	5.35345	5.48934	5.46472	6.02532	5.44636	5.70486	5.70086	4.68713	4.74903	5.5483	5.50861	3.06466	3.57738	3.71619	4.84552	4.03527	4.90429	5.11254
FZD7	1.57171	0.000219085	0.00443049	6.05023	4.47852	6.30899	5.61794	7.47227	6.96699	5.2567	6.50897	5.22185	5.47054	7.24039	4.43769	4.26992	4.47623	4.85553	4.0936	3.3835	3.84108	5.46174	4.36435	5.18475	4.85455
G6PD	0.955737	0.00394222	0.0339737	4.95666	4.00092	5.17798	6.01656	4.71034	5.92307	4.69731	4.16921	4.93221	4.10756	4.89537	4.93698	3.94987	3.72231	3.57685	5.99952	4.01295	4.17395	3.80966	3.3974	3.3588	4.0079
GABBR2	0.978955	0.00359159	0.0318419	4.1269	3.14794	3.06849	2.99961	3.37838	4.33342	4.78621	3.7896	4.60413	5.127	5.6676	3.51454	2.8897	2.83213	3.13003	4.21287	3.1336	3.15004	2.97749	3.05367	3.13825	2.96164
GABRE	1.68743	0.00314154	0.0290536	5.36219	3.67476	3.09594	8.2441	7.03662	5.63641	3.56656	5.31575	5.22511	4.63678	6.89622	3.9684	3.30375	3.71282	3.73762	4.38459	3.72315	4.5045	3.08809	3.33721	3.435	3.52087
GAGE12B	1.97466	0.0294101	0.136085	4.65715	2.68249	3.25535	2.82662	2.77506	4.49089	3.07941	2.74252	10.8782	8.28614	5.78367	2.45361	2.85542	2.47755	2.48252	2.49542	2.58674	2.55343	3.55538	2.68425	2.56907	2.56508
GALT	0.593611	0.0191403	0.10183	6.39755	5.80394	6.59849	5.98785	5.63613	6.14434	7.66557	6.41378	6.5571	6.54952	6.12281	6.29988	6.1438	5.32684	5.87272	4.61922	6.05213	6.06859	5.3953	5.8941	6.54631	6.12034
GANAB	0.693035	0.000531113	0.00834955	6.16351	5.47047	6.43914	6.88999	5.56227	5.47856	6.53835	5.77674	6.59512	5.90527	5.93046	6.51921	5.91264	5.51376	5.6625	5.32875	5.50101	5.37659	5.33472	5.51903	5.07596	5.47977
GAPDH	1.09085	0.000124257	0.00289814	10.5474	9.45657	10.7747	11.9475	10.3184	10.3486	10.1624	9.32179	10.2883	10.5643	11.3714	10.3768	9.45219	9.44576	9.7704	9.75848	9.32503	9.3646	9.04674	9.14335	9.35336	9.90581
GAS5	0.595086	0.00474977	0.0390605	3.6274	3.03232	3.14127	3.70303	4.42684	3.76552	3.08607	3.56656	3.34132	3.62592	2.98541	4.63209	3.37545	3.15412	3.03393	2.80396	3.07132	2.54709	2.78568	3.36708	3.09724	3.0873
GCDH	0.678749	0.00897498	0.0613831	4.80436	4.12561	4.67345	5.74956	4.80564	3.94987	5.55778	4.21675	4.95573	3.8883	5.02437	5.22212	3.60169	4.5509	3.8093	4.07677	4.29861	4.23595	5.06737	3.76165	4.09239	3.76144
GCSH	0.628614	0.0318324	0.14334	7.91056	7.28194	7.32285	8.6193	7.74782	7.85466	8.70981	7.24838	7.61877	7.58794	8.00359	8.39242	6.8028	8.40739	8.16437	5.81053	7.3293	6.6658	7.36249	7.1583	7.6249	7.49353
GEMIN6	0.888565	0.00245438	0.0244833	7.05263	6.16406	7.58693	6.71602	7.2209	7.42098	6.71668	6.86723	6.97927	6.92464	6.68974	7.4039	5.96292	6.54352	6.65853	4.18112	6.74986	6.55582	6.33182	6.55282	5.55187	6.55234
GET4	1.22783	0.000196722	0.00409457	5.56113	4.3333	6.74444	6.23551	5.79327	5.32723	4.93721	5.46349	4.06266	6.27144	5.1872	5.58881	4.84238	4.36647	4.45611	3.5701	4.71475	4.62098	4.49015	3.44464	4.7159	4.11153
GGCX	0.748911	0.000247448	0.00484442	5.40831	4.6594	5.17302	4.98516	5.32408	5.67268	5.25764	5.54218	5.25138	6.0796	5.46383	5.33352	4.52808	4.90429	4.94311	3.69216	4.53171	4.55968	5.38101	4.54378	4.52741	4.98274
GGH	3.36399	9.74601e-07	8.672e-05	6.90813	3.54415	6.49359	7.25153	5.15731	8.62325	6.65972	8.10061	7.09839	6.49695	8.30631	4.89368	3.22975	5.53915	4.86957	2.17228	3.04029	3.24997	4.45497	2.16025	3.2192	3.50604
GID4	0.799466	6.21697e-05	0.00174782	3.47097	2.67151	3.71335	3.71851	3.23651	2.9304	4.00538	3.36829	3.36829	3.55951	3.70379	3.10569	2.19082	2.72876	3.17082	3.14711	2.77	2.24583	3.05459	2.16686	2.60083	2.63944
GID8	0.781948	0.000247735	0.00484472	7.37244	6.5905	7.47378	7.85318	7.14268	7.67578	8.02301	6.54986	7.24148	7.3293	6.59769	7.83769	6.5875	6.97927	6.68693	6.1737	6.68044	6.80029	6.56625	6.37728	6.77304	6.28028
GINS1	2.98668	9.6661e-11	1.43348e-07	7.80692	4.82024	8.31605	6.85221	6.88325	7.63208	7.67075	8.07756	8.9756	8.04248	7.53262	8.08658	4.25372	5.39892	4.41264	5.11703	5.32799	3.9533	5.22156	4.32473	5.03443	5.15807
GINS2	0.847598	1.80818e-06	0.00013254	5.28714	4.43954	5.2012	5.37978	4.96396	5.52834	5.95986	4.82741	5.1307	5.24038	5.46031	5.17949	4.31278	4.6426	4.13751	4.83548	4.61372	4.20407	4.24744	4.38807	4.48283	4.53094
GINS3	0.742486	0.000546777	0.008476	3.92843	3.18595	3.24355	4.54196	3.83064	3.54509	3.74375	4.23993	3.73155	4.12883	4.30144	3.9776	2.41205	3.71335	2.98882	2.77704	3.15631	3.64842	3.35892	3.03969	3.00666	3.7582
GJB2	1.48947	0.0397775	0.166802	4.41543	2.92596	3.52775	6.20811	4.19944	8.60457	3.32359	4.74083	2.20887	2.4712	6.90604	1.96388	2.10677	3.85887	4.18688	3.16859	2.19764	2.85386	2.78568	2.87625	2.71443	2.51059
GLDC	2.62771	9.59164e-06	0.000440695	6.94708	4.31937	6.76209	6.41378	7.20704	7.20787	5.28509	6.22782	8.65422	5.33888	9.54597	6.82803	4.11916	4.54222	4.0751	5.639	4.17938	2.94461	5.23971	3.71406	4.42453	4.31589
GLIS2	0.831385	0.0164587	0.0918029	8.11262	7.28124	8.01846	6.6063	8.9435	9.24732	7.64177	6.84738	8.82908	8.19924	8.21066	8.58251	7.62416	6.93503	7.28976	7.33458	7.17143	6.89046	6.12643	7.0977	8.24994	8.0929
GLRX5	0.950656	0.0090746	0.0618031	8.2829	7.33224	7.47166	7.91933	8.69523	9.11497	8.60457	8.6906	7.79179	7.3336	8.96799	8.23922	7.03396	8.25862	7.99656	5.1201	7.10236	7.33812	8.30146	7.07054	7.44055	7.66012
GMEB2	0.675074	0.0145435	0.0844802	7.27586	6.60079	7.37282	6.27324	7.17882	7.05872	8.09332	7.05995	8.2416	7.30078	6.42766	7.75172	6.75782	5.93107	6.22874	7.85466	6.16441	6.39768	6.44912	6.44555	6.85552	6.92331
GMPS	1.22732	3.2307e-05	0.00108994	7.4384	6.21108	7.7281	6.97395	7.33753	7.11655	7.60286	7.729	7.36404	7.39868	8.1593	6.97395	6.25773	6.43749	6.1771	7.72449	5.34312	6.00294	5.64516	5.76508	6.00987	6.74778
GNAI3	0.817985	0.00994217	0.0649526	7.14622	6.32824	6.40443	7.20902	7.29112	7.54677	7.14128	7.24334	6.49772	7.60574	8.26269	6.2601	6.20131	7.17409	6.68439	4.82443	5.355	6.69467	7.01648	6.1189	6.61106	6.60203
GNGT1	1.88946	3.35513e-06	0.000203088	3.84262	1.95316	4.76847	3.26865	3.50384	4.22672	5.05015	2.01024	4.33428	3.24599	3.19391	4.82389	1.80443	1.74115	2.06544	2.30541	1.6066	1.82932	1.57184	2.03203	2.0324	2.54298
GNL2	0.925329	0.00203342	0.0213429	8.88568	7.96035	9.51338	8.09561	8.95589	8.07838	9.17186	9.01803	9.01542	9.94755	7.93832	9.12238	8.78349	7.28081	7.42294	8.65422	8.23431	7.82956	7.08646	7.9445	8.01027	8.35697
GNPDA1	0.921804	0.000295559	0.00549036	7.8899	6.9681	7.57977	6.98101	8.41027	8.0088	7.39452	7.74155	8.88519	7.9592	8.18868	7.75003	7.13338	6.98823	7.23026	6.08583	6.86426	6.77689	6.60069	6.90663	7.61324	7.48158
GOLT1B	1.13598	0.00347191	0.0312209	6.87038	5.7344	6.64409	5.97733	6.59947	8.9412	6.83137	6.72445	6.5875	7.36747	6.91659	6.1143	5.18282	6.74519	6.18584	3.86606	6.08908	5.89835	5.69802	5.2523	6.24923	6.1771
GORASP2	0.840731	0.00677732	0.0499004	8.00616	7.16543	7.75003	8.634	7.67075	8.49651	8.88342	8.1949	7.41232	7.38453	7.8466	7.7885	7.1258	7.97637	7.83852	5.27809	6.69016	7.08705	7.6249	7.12719	7.28902	7.61716
GOT1	0.654653	0.0214243	0.110034	5.92818	5.27353	5.30297	6.34256	5.63246	6.31106	5.62272	5.5498	5.20509	5.17085	7.61582	6.52851	4.70822	5.87305	5.41619	5.55778	5.27222	5.83229	5.06546	5.27592	4.75348	4.9807
GPATCH1	1.41245	0.00162587	0.01823	6.7854	5.37296	7.5435	5.35345	6.14217	6.17454	6.94766	6.79122	8.16925	7.24686	6.05655	7.42881	5.54194	5.08133	5.09036	2.9277	6.87301	5.39245	5.45361	5.69671	5.94827	5.72417
GPC1	0.672998	0.0310746	0.141217	5.31664	4.64364	6.63542	4.80867	4.98317	5.90615	5.72459	4.78946	5.37074	4.24806	4.82013	5.88003	4.1387	4.25506	4.44977	6.36581	4.25823	4.52589	4.58981	4.3107	4.53292	5.00955
GPI	1.61388	1.55342e-06	0.000119158	8.11393	6.50005	8.16437	8.43848	8.00163	7.92238	7.89734	7.74366	8.38519	8.42324	8.46164	7.70138	6.45588	6.59902	7.21606	4.61747	6.69279	6.84472	6.13823	6.38746	6.80943	7.23948
GPN2	0.687907	0.00627723	0.0472545	4.97524	4.28733	5.20964	4.53329	4.60857	5.9765	5.15295	4.30803	5.3217	5.07755	5.22266	4.3415	3.96182	4.24552	4.44228	3.32713	4.21974	4.18265	4.97575	4.14369	4.13606	5.23871
GPR143	0.857674	0.00925076	0.0624117	3.9494	3.09172	3.69977	2.66424	3.78496	4.29621	3.87119	6.11333	3.32864	3.82954	4.65661	3.24947	3.0701	3.5341	3.33755	2.7602	2.88144	2.51113	3.14395	3.35124	3.45101	2.8765
GPR19	1.06879	5.29911e-06	0.000280664	3.79428	2.72549	3.83996	4.23473	3.46626	4.4261	3.75645	3.57999	3.92072	4.4759	3.13728	3.10538	2.41931	2.668	2.94461	2.21832	3.02714	2.56444	2.58619	3.07493	2.91784	2.83413
GPR20	1.06316	8.26639e-05	0.00215702	5.15158	4.08842	6.1189	4.57063	5.15963	4.598	4.42981	5.11574	6.17608	5.16656	4.51428	5.66616	4.36502	4.04493	3.62796	4.31248	4.14281	4.2468	3.6758	4.095	4.4951	3.8783
GPR89A	0.835121	0.00270004	0.026114	6.99319	6.15807	8.07408	7.41424	7.23207	6.8028	6.70918	6.31818	6.48971	7.2313	7.25841	6.40191	6.53999	6.45094	6.4003	4.84151	6.01615	6.23336	6.8264	6.57356	6.25016	5.44829
GPRC5A	0.730069	0.037274	0.160244	5.6452	4.91513	6.19486	7.04935	6.44349	5.52795	4.25614	6.76958	4.73713	4.76707	4.8673	5.83916	5.56279	3.80536	5.1031	5.13258	4.88163	4.89287	5.01671	4.71287	4.44251	5.60091
GPRC5B	0.613084	0.019488	0.103125	5.53689	4.92381	5.38375	5.28989	5.20996	5.81668	6.39169	5.67018	4.22175	5.79061	6.27391	5.32051	4.99203	5.33922	5.33502	3.7271	4.72151	4.53687	5.31394	4.86514	5.34502	5.06225
GPS1	0.58731	0.0107914	0.0685139	5.09732	4.51001	6.09204	5.82403	4.58022	5.1885	5.03639	5.22185	5.1154	4.75242	4.49847	4.66386	4.43928	4.40233	4.83011	5.50946	4.13168	4.6919	4.29891	4.2954	3.93684	4.56417
GPSM2	1.63562	5.8858e-05	0.00169087	5.83277	4.19715	5.06644	5.63246	6.21963	6.19948	6.43801	7.22509	5.50575	5.54035	6.73907	3.76144	3.38895	4.69731	4.18009	3.50353	4.11464	3.89664	4.50388	4.90833	4.49159	4.28659
GPX1	0.783004	0.00547941	0.0430135	9.39995	8.61695	9.611	10.5794	9.87429	9.15784	9.30959	9.23083	9.39557	8.63219	9.10335	9.1055	8.55337	8.41723	9.38795	7.28081	8.92582	9.07901	8.34459	8.34459	8.33293	9.50319
GRN	0.894014	0.0014066	0.0165118	7.80929	6.91527	8.95984	8.62909	7.44387	8.1949	8.09978	7.1039	7.49222	7.52407	7.21164	7.43357	6.83819	6.86151	7.28699	6.06558	7.02781	6.97995	7.26126	6.32348	6.69016	7.8178
GSTM3	0.993086	6.74566e-05	0.00185829	6.78568	5.79259	6.78493	6.37728	6.81176	6.50434	7.16657	6.84998	7.32594	6.85409	6.97016	6.21173	4.81958	6.34221	5.91934	6.22053	6.16755	5.79717	5.30996	5.27543	5.52527	6.54889
GTF2H4	1.41255	0.000591038	0.0089745	5.70273	4.29018	7.3293	6.62746	5.2457	4.4664	5.87563	4.929	6.69214	5.56929	4.96026	5.33216	4.28779	4.0486	4.37361	2.45177	4.38595	4.08195	4.8273	4.51718	5.09036	4.83731
GTF2IRD1	0.856678	0.00776897	0.0551262	6.79763	5.94095	7.4888	6.77988	6.54662	7.06172	6.87596	7.24453	7.43295	5.53365	5.66722	7.34496	5.68605	5.03675	5.67268	7.60196	5.832	5.7659	6.36581	5.63246	5.88974	5.92615
GTF3C2	0.639784	0.0083421	0.0581496	6.97169	6.33191	6.98964	6.08452	7.03511	7.33753	6.9607	6.90037	7.25757	6.98554	6.9978	7.16813	6.17262	6.45347	6.5826	4.59468	6.54821	6.65014	6.71439	6.36816	6.59431	6.64051
GTPBP3	0.901116	0.00021359	0.00434903	5.8938	4.99269	5.68029	5.42256	5.83916	5.55451	6.07608	5.60579	6.08583	7.22585	5.06704	6.38092	5.39287	5.06199	4.83863	4.87858	4.46233	4.81926	5.08919	5.1911	4.99094	5.20198
GUCY1B2	0.776167	0.0170098	0.0937895	3.66044	2.88427	2.59261	3.29099	4.79954	2.99883	3.29179	5.18699	2.71408	3.99393	3.16439	4.57122	2.84443	2.50087	3.4729	2.2117	3.05849	3.1747	2.65752	3.3215	2.98238	2.61822
GYS1	0.856421	0.00031014	0.00570171	6.32022	5.4638	6.58043	6.63625	5.97991	6.71509	7.06172	6.29122	6.02251	5.83548	5.74715	6.33245	5.48348	5.39335	5.93343	6.58698	5.45182	5.20996	5.0125	5.17197	4.98831	5.40621
H2BFS	0.743738	0.00255142	0.0250441	4.2478	3.50406	4.60321	4.75874	3.58027	4.32023	4.61596	4.46188	4.08594	4.47351	3.43647	4.1418	3.05995	3.44261	4.12823	2.48285	3.32824	4.0965	4.06885	3.97501	3.08285	3.37552
HARS2	0.763791	0.00359022	0.0318419	6.94237	6.17858	7.01035	7.88591	7.47728	6.8168	6.80589	5.98289	7.10308	7.76042	6.40394	6.1771	6.16654	6.60349	6.20433	5.52927	6.33823	6.50024	5.61636	6.26625	6.76737	5.79368
HAUS7	0.608523	0.00219599	0.0225504	3.85671	3.24819	4.25998	4.67313	3.82987	4.18981	3.35861	4.43461	3.73714	3.35464	3.59601	3.13331	3.62223	3.27293	3.28246	2.81318	3.2827	3.21875	3.15662	3.10139	3.39235	3.33928
HCG8	0.719416	0.0292251	0.135546	4.19484	3.47542	4.64802	5.19503	5.05972	3.32763	4.43586	3.03852	4.56931	4.6919	3.52708	3.4553	3.36116	3.85105	3.49585	1.71476	3.8251	3.78283	3.93075	3.72037	3.87119	3.20117
HDAC1	0.609035	0.0321033	0.144052	9.57258	8.96355	10.4847	9.01431	10.5001	8.9212	8.95435	9.46704	9.9098	9.69326	8.88342	9.89769	9.0974	8.88149	9.11188	7.28081	9.12238	9.50622	8.95589	9.27142	9.20643	9.20159
HDGF	0.602567	7.6717e-05	0.00203466	9.9132	9.31063	9.59511	9.62885	10.2683	10.3268	10.3026	9.86983	9.86983	9.6187	9.71241	9.93945	9.20882	9.23605	9.27142	9.8169	9.15097	9.50319	9.3301	9.35336	9.08272	9.15275
HELLS	1.10843	1.29381e-05	0.000548204	4.6878	3.57937	4.42502	4.95953	4.25614	4.50361	4.76194	4.22159	4.63276	5.02704	5.15771	4.93263	3.74796	3.63325	3.36517	2.90077	3.52953	3.20464	4.49261	3.11359	3.32577	4.48042
HGH1	0.829122	0.000651077	0.00962424	6.73902	5.9099	6.30233	7.22192	6.83071	6.31299	6.43291	7.47895	7.0658	6.4258	6.15656	7.16227	5.54154	5.61999	5.75154	7.10706	5.77528	5.74778	5.45003	5.98995	6.2967	5.81916
HGS	0.649819	0.0124249	0.0757497	6.78244	6.13262	7.66277	7.15558	5.89343	7.04092	6.48013	7.19622	7.13176	7.17538	5.35093	6.73729	6.34395	5.62711	5.95378	6.71297	5.64862	6.36922	6.13823	6.16713	6.46523	5.89997
HILPDA	0.976705	0.000492183	0.00790513	5.88276	4.90605	5.57687	6.77689	6.17754	6.10567	6.39867	5.88094	4.79512	5.24458	6.46319	5.40809	4.94235	5.04207	5.17988	3.79202	4.72274	5.26466	5.38967	5.19555	5.04779	4.48379
HIST1H2AD	0.685354	0.0037607	0.032871	3.87123	3.18588	4.47623	3.8036	3.53863	5.12579	4.51287	3.38163	3.27726	3.33984	3.62378	3.63271	2.81468	3.19012	3.25156	3.03812	3.27481	3.72001	3.52549	3.24798	2.96594	2.83011
HIST1H2AE	1.35848	0.00287987	0.0272317	3.88718	2.52871	4.25347	3.73438	3.36917	6.32459	5.98862	3.56701	3.42816	2.57033	2.65862	2.97749	2.25388	2.75089	2.759	1.78307	2.2513	2.95163	3.06182	2.52995	2.30514	2.6404
HIST1H2AM	0.928722	0.00486061	0.0397601	3.73305	2.80433	3.44863	3.3741	3.35093	4.68749	5.90349	3.85003	3.23979	3.21093	3.15377	3.11133	2.80407	2.53084	2.85824	3.25156	2.76282	3.22167	2.66217	2.95806	1.8822	3.11164
HIST1H2BG	1.03687	0.00813251	0.0570237	4.13269	3.09581	5.72459	3.74522	3.45867	6.08628	5.127	2.86371	3.6506	4.19977	3.57024	2.90077	3.7624	2.94504	2.95345	2.61414	2.61362	3.17149	3.33272	3.35037	3.03921	3.17568
HIST1H4J	0.609184	0.0433037	0.176496	5.92932	5.32013	5.60298	5.14341	5.62735	6.21587	6.59902	5.59297	6.60689	5.14196	6.23648	6.52626	5.24978	5.46174	5.64232	3.3699	5.74988	5.84096	5.65407	5.64862	5.72064	4.86344
HIST2H2BE	1.2216	0.0282424	0.132526	6.1146	4.893	8.0929	7.33208	5.39544	8.01846	6.02671	4.57261	5.24168	5.38541	6.90104	4.17966	4.96769	6.07163	5.25967	2.93926	4.94375	6.19486	5.14414	5.70984	4.05087	3.64829
HIST3H2A	1.4684	2.68885e-06	0.000174882	6.71559	5.24719	6.97844	6.28551	6.90604	6.7886	6.76685	6.67139	6.45305	7.20962	6.03959	7.05683	4.06943	5.32916	5.42015	4.55323	5.61966	6.04393	5.91986	5.62127	4.43904	5.45621
HJURP	2.43346	1.84119e-09	1.31063e-06	5.35963	2.92618	6.64352	6.13893	5.07879	5.14196	5.13928	5.28212	4.73458	4.85696	6.1752	4.40499	2.51689	3.76286	2.84938	2.89555	2.93836	2.73123	2.6595	2.78321	3.0735	3.0513
HLTF	1.41918	0.021598	0.110602	8.02803	6.60885	8.88519	7.91517	7.76162	7.99656	7.6505	8.18085	7.39777	8.05481	9.10082	7.33699	5.72608	7.55321	7.56208	1.62889	7.92177	7.05631	7.38929	7.29985	6.99944	6.95157
HMGB3	1.41535	9.74685e-05	0.00242213	9.35027	7.93492	8.92357	9.3301	9.86227	9.34648	8.88873	9.74726	8.98228	9.65889	10.3026	8.46049	7.98326	9.09099	8.25862	5.9183	8.04659	7.72162	7.80909	8.30235	8.37544	7.84294
HMMR	2.03899	8.66091e-05	0.00224025	5.45342	3.41443	4.42684	6.18377	5.37388	6.5914	5.25597	7.1281	5.19503	3.77054	7.13441	3.47426	3.23374	4.59362	3.58474	3.26948	2.45885	3.61519	3.7393	3.16892	3.21093	3.26948
HN1	0.685827	0.0059904	0.04584	6.37271	5.68689	6.78261	6.23503	6.00814	7.47227	6.23234	7.29559	5.67135	6.48325	5.93727	5.60928	5.27048	5.59073	6.02671	5.34848	5.27072	6.25145	5.88283	6.03375	5.38507	5.80867
HOMER3	0.64129	0.000157722	0.00349543	4.50864	3.86735	4.6436	4.64329	4.57369	4.63149	4.95985	4.07677	4.90288	3.78309	4.2954	4.57631	3.85146	3.57685	3.93323	4.43516	3.69287	3.80463	3.8868	3.78645	3.84684	3.85918
HOOK2	1.22449	0.00368612	0.0323782	6.25003	5.02554	7.57785	7.52926	5.45959	5.02473	7.25689	5.46304	7.57757	5.39718	4.97072	6.24343	5.42102	5.23326	5.3678	3.48019	5.01796	5.17546	5.1494	4.82135	5.40174	5.1872
HRASLS	1.89779	1.2684e-05	0.000543916	5.44885	3.55106	6.20288	4.87248	5.45279	5.5272	4.31359	5.19197	5.06042	5.78007	7.75101	4.33613	3.54907	4.61076	3.49369	2.67153	3.54021	3.05219	3.73742	3.63761	3.55232	3.66582
HSD11B2	0.69902	0.00974961	0.0642189	4.17754	3.47852	4.99058	5.43941	3.74245	4.14281	3.55677	3.56029	3.71282	4.221	3.85441	4.55484	2.89011	3.89557	3.46146	3.68294	3.89796	3.22045	3.21198	3.95868	2.56028	4.00574
HSD17B1	0.678769	0.0103649	0.0666136	5.09114	4.41237	5.50041	5.73657	4.42825	5.96245	6.16271	4.84612	4.75946	4.59719	4.23669	4.6815	3.90504	4.10958	4.67057	3.96182	4.47491	4.29621	5.12439	4.61624	4.15027	4.81464
HSD17B10	1.12885	1.17691e-05	0.000514604	9.23191	8.10306	9.45507	8.48673	9.44915	9.45507	10.4738	8.85768	9.49414	9.06215	9.1083	8.47697	8.07266	8.48049	8.30146	7.60371	7.88294	7.98572	8.04799	8.04248	8.18376	8.42941
HSD17B14	0.850661	0.000223842	0.00450622	5.51543	4.66477	6.44509	5.33801	4.87353	5.71041	5.82097	5.9339	4.85377	5.44711	5.41687	5.31464	5.06459	4.51326	4.50166	4.52966	4.14984	4.62629	4.14255	5.27135	4.79118	5.0573
HSPA12A	0.711976	0.000527044	0.00831496	4.93233	4.22035	4.98317	4.56334	4.59936	5.14788	4.76433	5.663	5.06225	5.66797	4.09028	4.78171	3.99139	4.06432	4.14954	4.24456	4.3323	4.26802	4.0816	4.89083	4.01206	4.1689
HSPA14	0.909396	0.0111304	0.0701402	8.56189	7.65249	7.88062	8.75776	8.93894	8.02909	9.3672	8.46889	8.05564	9.37195	7.558	9.19078	8.67623	8.0929	7.28562	5.56775	7.83553	7.34022	7.24764	8.27985	8.02909	8.17007
HSPBAP1	0.829039	0.0327371	0.14572	7.77441	6.94537	8.66204	6.80227	7.5909	7.28144	6.99722	7.3293	8.22368	8.79886	7.39452	8.66388	8.16925	6.32529	6.39638	4.85865	7.40265	7.4409	6.4983	7.58436	7.78593	6.99201
HSPE1	0.750504	0.0138921	0.0817267	8.42757	7.67707	8.35591	9.44915	9.16374	8.4404	9.29065	7.55224	7.94679	8.18638	8.69944	7.19101	7.39006	8.34055	8.3737	7.36556	7.61495	8.0705	7.86756	7.95735	6.61803	7.1724
HSPE1-MOB4	1.10208	0.014019	0.0822829	7.55389	6.45181	7.50914	8.54846	7.90193	7.69475	7.79179	7.73516	6.55517	7.52078	7.89333	6.38842	5.64305	7.54916	7.66811	3.40969	6.59572	7.11449	7.1039	6.41455	6.36046	6.65901
HYAL2	0.676667	0.0146093	0.084714	6.12911	5.45245	7.33644	7.35483	5.89492	5.68812	5.78007	6.11037	5.2927	6.01182	5.74226	6.0796	5.1103	6.05815	5.98526	5.89066	5.42992	5.20009	4.66386	5.23046	5.00605	5.94971
ICAM3	0.668525	0.0327519	0.14575	6.03905	5.37053	6.37263	7.28628	6.24081	5.63959	7.3577	6.06889	5.83852	4.85696	4.99686	5.73228	5.4311	5.58375	4.86551	5.09862	5.54218	5.21491	5.30079	4.85299	5.19705	6.61837
IDH1	1.33035	0.0119234	0.0735887	8.25914	6.92879	9.3394	7.74782	8.16309	7.85922	9.14124	8.95221	7.13811	7.85922	8.95812	7.43295	6.64687	7.89545	7.67681	3.015	7.17825	6.9732	7.89545	7.0749	7.42061	7.51137
IDH3B	1.24221	1.30458e-05	0.000551457	7.72666	6.48445	7.44342	8.86162	7.59666	7.62834	7.2313	7.02346	8.27353	7.56897	8.53382	7.10546	6.50362	6.74714	6.57645	6.62792	6.82414	6.27966	5.78445	6.42885	6.10592	6.96634
IFRD2	0.610728	0.0167532	0.0928174	6.71172	6.10099	6.86657	7.71251	6.8134	6.00724	6.51921	6.19846	5.96151	6.87925	6.8432	7.31584	6.62444	5.97418	6.06918	4.84913	5.88333	6.16386	6.11633	6.02623	6.77128	6.53195
IGF2	1.3665	0.00118412	0.0146033	5.73464	4.36814	6.13202	6.57713	6.03466	6.8604	4.76847	5.73088	6.35343	4.06231	3.70753	7.11958	4.37279	3.85709	3.94014	4.5348	4.49807	4.14788	4.16307	4.49866	4.68784	4.98109
IGFBP2	2.52329	7.29788e-05	0.00195005	6.31173	3.78843	8.61209	9.31262	4.22806	6.42353	7.03662	5.3177	4.72529	4.91112	6.82414	5.72608	4.30084	4.0652	3.91416	3.80327	3.51814	3.1669	3.35892	3.62041	3.53745	4.59906
IGFBP3	1.37771	0.0072249	0.0524793	7.31368	5.93597	8.29451	8.40898	7.25972	7.29559	6.56788	7.56208	7.67075	5.09677	8.08514	6.89537	7.26464	5.19248	5.87022	3.86377	5.96659	4.82035	5.15368	6.44808	7.82956	6.95033
IL1RAP	1.04629	0.000114884	0.00275166	4.55291	3.50662	4.60245	5.20198	4.25234	4.64329	3.98194	5.61423	4.43717	3.91517	5.12081	3.7597	3.34254	4.23232	3.90778	2.94197	3.5433	3.71335	3.1272	3.27624	3.29009	3.69139
ILF2	0.926407	0.0144627	0.0842205	7.05739	6.13098	7.4353	8.56755	7.16606	7.75101	6.65901	6.98874	6.09008	6.81626	6.88263	6.21721	6.11221	6.76261	6.70806	4.02455	6.65671	6.82339	6.13823	5.67977	5.41576	6.98849
IMP4	0.910913	5.79854e-05	0.00167518	7.35767	6.44676	6.733	7.16887	7.69241	7.60907	7.99084	7.35139	7.13517	6.97395	7.15392	7.76808	6.788	6.37777	6.28781	7.0658	6.74576	6.22053	6.15959	6.13291	5.73076	6.95863
IMPA2	1.22769	0.0212886	0.109717	6.07293	4.84523	6.74341	7.59602	7.371	5.28754	6.47004	6.00062	4.66689	5.6843	7.4941	3.41535	3.86902	4.93969	5.35275	2.68891	5.03867	6.01714	5.8772	4.56005	5.01551	5.0934
IMPAD1	0.718593	0.000682661	0.00991725	4.66927	3.95068	4.60812	4.49431	4.4868	5.06497	4.75373	5.04643	4.14061	4.54706	5.32123	4.22947	3.79233	4.89771	4.10314	3.45997	3.42771	3.69989	4.13388	3.72181	4.00525	4.2651
INA	1.32402	0.00285207	0.0271129	4.63541	3.31139	6.01714	4.0995	3.76833	4.37786	3.88063	3.48091	7.18626	5.78399	3.81515	3.94439	3.53955	2.97404	3.61615	2.69857	2.92188	3.20433	4.17572	3.13911	3.17196	3.67261
INHBB	0.753383	0.0299153	0.137528	7.15705	6.40367	7.94785	6.02827	7.60371	7.16276	6.36922	8.27353	7.78281	7.21288	5.80104	7.38845	5.89964	6.29368	6.39768	5.58706	7.20851	6.73421	6.86208	7.06983	6.87814	5.10586
INPPL1	0.688902	0.000602792	0.00909864	6.24077	5.55186	6.52272	6.98101	5.79157	5.62894	6.93332	5.72217	6.49923	6.03933	5.89266	6.39671	5.77055	5.39063	5.15771	5.45036	5.81017	5.35123	5.5883	5.5394	5.84235	5.61794
IP6K2	1.03	6.77797e-05	0.00186431	8.24834	7.21834	8.44752	7.98326	8.59029	7.61324	7.57314	8.53233	8.0837	9.3501	8.04606	8.26373	7.74488	7.19986	7.33644	6.21542	7.61877	7.11958	7.23486	7.51137	6.90239	7.29985
IPO9	0.585031	0.0101961	0.0660298	6.9573	6.37227	6.87981	7.23026	7.02056	7.02697	6.38057	7.41164	6.67864	7.28208	6.29579	7.36664	7.04887	6.14103	6.22104	5.54944	6.33245	6.41111	5.51779	6.61233	6.89708	6.99152
ISG15	2.358	0.00167851	0.0186576	8.72786	6.36986	11.3714	10.2069	6.91286	7.97918	10.6781	8.17763	10.1322	7.12023	6.51514	8.18499	7.43005	6.11704	5.92434	5.24523	9.96042	5.56436	6.04211	6.06004	5.6251	5.72988
ITCH	0.807622	3.84929e-05	0.00123873	4.58608	3.77845	5.12846	4.84765	3.90465	4.1046	4.38311	4.14002	4.62504	5.16837	4.99494	4.56392	3.73686	3.86485	3.98849	3.69353	3.38895	3.59982	3.74098	3.90332	3.98529	3.88245
ITGA7	0.864077	0.00463476	0.0383272	4.78688	3.9228	5.96823	3.58727	4.16421	4.46021	5.3517	4.29005	4.43832	6.43749	4.90778	4.26351	4.18076	3.80248	3.87809	3.70672	4.06804	3.95535	4.05942	3.80497	3.62678	4.1454
ITGB1BP2	0.611123	0.0181252	0.097863	4.669	4.05788	6.51616	4.41384	4.2726	4.15944	4.49015	4.90546	4.4094	4.58283	4.72886	4.21126	4.77729	4.24065	3.63523	4.2178	4.15465	4.18171	3.44908	4.21311	3.85309	3.85617
ITGB8	0.90689	0.00033374	0.00599923	4.18111	3.27422	4.64284	5.03765	4.4167	3.94201	3.10845	4.24093	4.80867	3.125	4.5182	3.97059	3.6418	3.29522	3.42574	3.22079	3.29924	3.02147	3.48892	3.0332	3.01726	3.29851
ITM2C	1.01508	0.00275777	0.0265748	6.91089	5.89581	7.80662	6.07499	5.65735	7.67275	7.06879	7.28902	8.08199	6.37545	6.00005	7.08192	5.68857	6.71717	6.1958	6.62402	5.48505	5.67977	4.9807	5.67308	5.68259	6.23132
ITPA	0.991696	5.53763e-06	0.000288996	8.60686	7.61516	8.51959	8.83099	8.31343	8.44752	8.54226	8.42061	9.41634	8.66608	8.18376	8.72798	8.03884	7.44478	7.371	8.23041	7.85569	7.79847	6.86426	7.53329	7.40502	7.60987
JUP	0.999839	0.0204765	0.106675	7.07464	6.0748	9.12806	7.83233	7.46943	7.38453	6.31721	6.3262	7.57148	5.50907	5.24269	7.96537	7.18849	5.15472	6.31406	6.65901	5.6843	6.26227	5.41424	5.99298	5.90039	6.17754
KAZN	0.733151	0.0261333	0.125474	6.99588	6.26273	8.09744	6.38549	7.33644	5.75294	6.83382	6.25927	8.12926	7.84793	5.78972	7.52649	6.5101	6.07394	6.02251	6.5826	6.59714	6.49968	5.37121	6.50362	6.75399	5.71252
KCNG1	0.837822	1.6167e-05	0.00065537	4.57897	3.74115	4.23739	3.91258	4.54606	4.73713	4.38807	4.28952	5.22849	4.86683	4.36178	5.22185	3.81326	3.72914	3.69646	3.70199	4.04036	3.63174	3.48847	3.50641	3.9684	3.83526
KCNK5	1.09968	0.000340039	0.0060822	6.21484	5.11517	7.36164	5.67856	6.76261	6.43863	6.57645	6.20657	5.86442	6.18938	5.22266	5.84754	5.04477	4.25581	5.61152	5.03969	5.16082	4.25047	5.87674	4.94454	4.95953	6.00778
KCNMB3	0.754782	0.0112189	0.070573	4.95498	4.2002	6.23887	4.28332	5.29645	5.00056	4.25047	5.05983	4.07944	5.77007	5.33715	4.23364	5.0125	3.8804	3.74993	4.98471	3.85982	4.6815	3.60711	3.89285	3.9629	4.37025
KCNN2	0.74294	0.0238355	0.118351	2.82729	2.08435	2.16686	2.61706	3.01689	2.35049	2.08214	2.33622	2.3664	2.44175	5.3177	3.57738	1.87589	2.38349	2.54035	1.88402	2.20917	1.66891	2.02794	2.18505	2.17759	1.89106
KCNS1	0.633466	0.0167294	0.0927515	5.00528	4.37181	4.09537	3.96224	5.17798	4.63033	4.87055	6.46523	5.95753	5.04477	4.67746	5.17134	4.47351	4.34339	4.40169	4.53269	4.52176	3.98411	4.03646	4.17531	4.72624	4.52299
KDELC1	0.61902	0.00870878	0.0599542	4.10489	3.48587	4.13363	4.71339	3.47954	4.16125	3.56542	3.45253	4.78705	4.06601	4.3843	4.30583	3.53228	4.44682	3.44554	2.41823	3.42816	3.48286	3.78822	3.36944	3.7289	3.2183
KDM3A	0.692789	0.0374344	0.160758	8.13052	7.43773	8.45578	8.27553	7.96593	8.46397	7.7536	9.27645	7.70631	8.70728	7.77748	6.92284	7.87898	7.22447	7.68797	5.2359	7.94582	8.02769	7.61324	7.59666	7.40107	7.76547
KDM5B	0.738806	0.00358135	0.0318191	6.11998	5.38117	5.82002	5.67939	6.35437	6.05935	5.46225	6.45996	6.10215	6.3435	6.23503	6.68377	5.45003	5.82503	5.58649	3.63761	5.44779	5.75577	5.80263	5.47195	5.40484	5.42958
KHDRBS3	1.16563	0.00581952	0.0449302	6.48586	5.32023	4.77689	8.60651	7.45561	6.42987	7.01775	4.88902	7.15558	5.27255	6.90663	6.34817	5.37207	5.68812	5.49401	5.63395	5.24403	5.26409	5.49463	5.23797	5.44636	4.32703
KIAA0101	1.4506	8.54458e-06	0.000406576	6.4276	4.97699	5.68383	6.84378	6.23503	7.08039	8.08199	5.8493	5.57953	6.31818	6.18938	6.41455	4.58751	5.57157	4.93386	5.21525	4.55045	4.78336	5.32764	4.84151	4.82979	5.12901
KIAA0754	0.891752	0.0334965	0.148285	6.11636	5.22461	5.58951	5.18282	5.78399	6.04794	6.89987	5.9678	6.60522	7.53617	4.77902	6.77128	6.35975	4.38822	5.04847	3.4139	6.43976	5.70229	4.05274	6.09539	5.19445	5.55114
KIAA0907	1.3489	0.00150358	0.0172553	10.2279	8.87898	10.697	9.92651	11.1079	9.611	9.90138	10.3934	9.51338	10.9362	9.95298	10.2391	9.54597	9.34321	8.77135	5.77833	9.49688	9.04266	9.30313	9.25166	9.04106	9.21559
KIAA1024	0.829104	0.00190585	0.0203703	3.83884	3.00973	4.15108	3.69375	5.16583	4.31743	2.87992	3.81858	3.80248	4.14469	3.15377	3.26085	3.07872	3.18574	2.78221	2.07087	3.35255	3.11057	2.90163	3.50535	3.10538	3.0043
KIF11	3.01525	9.55562e-08	1.88946e-05	6.39434	3.37909	5.95485	6.28293	6.12875	7.9129	6.52885	6.02058	5.25363	6.83616	7.85683	5.16793	2.94883	5.08373	3.9414	1.80652	3.015	3.73365	3.88354	2.82459	3.35819	3.19548
KIF14	1.54861	1.9395e-07	2.92502e-05	5.57093	4.02233	5.6676	5.81687	5.57477	5.66702	4.90505	6.34817	5.19795	5.25824	6.26687	5.0068	4.56869	4.80024	4.0855	3.98355	4.16125	4.06231	3.35892	3.49331	3.67816	4.03132
KIF15	2.93838	1.68192e-07	2.69652e-05	5.85677	2.91839	7.08914	6.60927	5.66972	5.15402	5.69045	6.9195	4.65661	6.30899	6.9095	3.5605	3.41446	3.96354	3.00102	2.13431	3.14525	2.53102	2.05866	2.6168	3.07842	3.24043
KIF18B	2.41921	1.48663e-11	3.30701e-08	6.97233	4.55312	7.36404	7.06879	6.72882	7.40826	7.61582	6.55983	6.93102	7.08774	6.70447	6.2545	4.12576	4.47051	3.94506	5.07915	4.79512	4.33263	4.85126	4.08291	4.83892	5.00989
KIF1A	1.15798	0.000344583	0.00613835	3.61878	2.46079	4.59999	2.55375	3.8144	4.02628	2.72848	2.92083	4.87404	2.94047	3.09084	4.63866	2.44487	2.3647	2.28664	2.92362	2.42428	2.24091	2.39814	2.63042	2.43524	2.45912
KIF20A	3.61775	4.04751e-11	7.20296e-08	7.08694	3.46919	7.23418	7.08646	7.62642	6.83452	6.99722	6.9607	7.22192	8.0321	7.79013	5.08577	3.35571	4.58843	3.72037	2.91238	3.2884	3.74193	2.9294	2.92212	3.27987	3.9533
KIF22	0.876063	6.98077e-07	6.71513e-05	4.50573	3.62967	4.98593	4.89246	4.30248	4.54116	4.52424	4.42291	4.46776	4.09615	4.30956	4.51463	3.84889	3.75423	3.76928	3.69313	3.9917	3.1675	3.76686	3.27073	3.52775	3.50657
KIF23	3.11296	1.70803e-07	2.71393e-05	5.96068	2.84772	6.41514	7.23486	6.04923	6.58171	6.96699	5.74336	4.63308	6.31986	6.66872	2.99385	2.22682	3.25597	2.96321	3.10139	3.55803	2.6423	3.27519	2.58946	1.89561	2.96925
KIF2C	2.24179	1.02294e-08	3.91456e-06	5.94347	3.70168	6.57067	6.1784	6.18005	5.97602	6.59849	5.84969	5.72459	5.52119	6.65014	4.18545	3.60517	4.17395	3.84085	3.45067	3.34164	3.26584	3.5143	4.12447	3.48383	4.21606
KIF3C	0.909649	0.000545099	0.00846472	5.52861	4.61896	5.93558	4.50535	5.72031	5.22185	4.62699	6.0288	5.81852	6.18098	5.23632	6.01142	4.58904	4.82342	4.20996	5.23996	4.5227	4.76655	4.42981	3.77443	4.96519	4.86856
KIF4A	1.2838	0.00326093	0.029852	5.34778	4.06398	5.42832	5.87563	5.24079	6.36046	4.97931	5.45879	5.29709	5.48545	5.97308	3.37887	3.90396	5.38375	4.96931	2.2632	3.64712	5.47748	4.595	3.64084	3.4913	3.26784
KIF5C	2.47027	2.79888e-05	0.000977445	7.17637	4.7061	8.70856	4.91466	6.16052	5.77007	6.48554	7.69954	7.32864	9.27142	9.17829	6.24648	4.50778	4.46411	4.57897	4.92826	5.56279	4.10842	4.98388	4.5182	4.9371	4.47149
KIFC1	0.957082	0.000488536	0.00788928	5.37866	4.42157	5.03197	5.62298	4.95985	5.23454	5.76625	5.52228	5.47236	5.25824	5.17006	5.74803	3.88523	4.24065	3.81242	6.11539	5.0796	4.22214	4.1364	3.96928	4.10568	4.64893
KLC1	0.650233	0.00745515	0.0535097	6.07065	5.42042	6.5258	5.7168	6.37834	5.72139	5.54667	6.47953	6.68741	5.81249	5.96403	5.87404	5.663	5.97948	5.28251	3.96928	5.75577	5.79552	5.17377	5.95952	5.39578	5.22952
KLF7	1.03346	0.000281934	0.00532057	5.80733	4.77387	5.78802	4.83243	6.03688	6.10436	6.51168	5.97602	4.94565	6.56424	6.05967	5.25434	5.01516	4.72764	4.98907	3.68322	5.02841	5.11222	4.41623	5.49136	4.53385	4.7415
KLHDC3	0.718718	0.0128492	0.0774873	5.2369	4.51819	6.42885	6.70172	4.87628	4.67572	4.73872	4.30286	5.58756	5.09036	4.49599	5.47098	4.27147	4.54889	4.75414	4.02779	4.48742	4.50002	5.02909	4.75306	4.79223	4.01776
KLHL24	0.887596	0.0161526	0.0905643	7.7194	6.8318	8.40149	6.32921	7.04788	7.28431	8.40594	5.9364	8.67238	8.38048	8.20068	8.53519	7.41966	6.29936	6.93414	5.7726	7.17409	6.59992	6.37403	7.28517	7.28761	7.17143
KLHL26	0.587986	0.00154163	0.017609	5.04292	4.45493	4.25714	5.37694	5.0241	4.64818	5.22511	5.52795	5.4692	4.6436	4.91734	5.33964	4.21576	4.56214	4.74752	3.96075	4.65062	4.22261	4.60321	4.17457	4.64636	4.76579
KLK10	0.710927	0.0176338	0.096188	5.32304	4.61211	5.77856	5.45003	4.85417	6.0552	5.4127	5.90488	4.19056	4.81926	5.06102	5.70404	6.26773	4.19296	5.17134	4.1373	4.44682	4.17296	3.95444	4.11221	4.90607	4.75933
KLK5	1.46673	6.73031e-05	0.00185694	5.11365	3.64692	4.82741	4.68546	5.16906	4.1454	4.77131	5.08786	4.05047	6.16589	7.07561	5.15807	3.68645	3.58757	4.13469	3.06898	3.1804	4.07781	3.216	4.00062	3.78801	3.72868
KLK6	2.39231	1.28401e-06	0.000103953	7.63687	5.24455	6.61537	7.02922	8.01027	9.16913	8.17648	9.5002	7.15392	6.87596	5.97056	7.86756	5.07472	5.09295	6.00195	4.69801	5.14314	4.83313	5.58408	5.02941	5.80867	5.17949
KLK7	1.93518	2.46951e-05	0.000893242	6.26143	4.32626	5.35317	6.13244	5.92055	7.05995	6.87814	7.82223	4.578	6.79449	6.42644	5.64893	4.13388	4.46276	5.54857	3.5701	4.95349	3.6077	3.92598	3.51734	4.10438	5.43835
KLK8	0.960346	5.02876e-05	0.00151019	5.07351	4.11317	4.93698	5.16512	4.28121	5.73268	5.27677	5.64305	4.47978	5.67661	4.91819	4.62475	4.03802	3.66279	4.56838	4.48914	3.92003	3.87756	3.88167	3.92406	4.23833	4.53171
KNOP1	0.724165	0.00247031	0.0245733	6.85737	6.13321	6.12198	6.51986	6.92464	6.73474	7.69573	6.5298	6.66803	7.80244	6.41044	7.16606	5.88726	5.83082	5.66797	5.94971	6.44091	5.95696	5.78714	6.73107	6.83944	6.24081
KNTC1	1.54055	4.84606e-05	0.00146844	5.7223	4.18175	7.41374	5.47826	6.0701	5.46938	4.28352	5.18011	5.33094	6.58377	6.0357	5.37744	4.70987	4.15607	4.29754	3.04467	4.10021	4.00091	3.98322	4.04493	4.39428	5.08577
KPNA2	0.857511	0.00586056	0.0452078	9.39671	8.5392	9.44312	9.47383	8.8516	10.6666	9.72339	9.25445	8.32817	9.38795	10.7225	8.11547	9.06562	8.71619	8.47905	8.42941	8.58455	8.41723	7.71506	8.51067	8.55845	8.91575
KPTN	1.07725	5.48335e-05	0.00160222	5.25506	4.17782	5.87481	4.43992	5.18659	5.54035	4.3843	5.14703	6.01839	4.96206	4.99767	5.99952	4.26456	3.82686	4.2395	4.80367	4.62222	3.94542	3.79451	3.72202	4.35346	4.20594
KREMEN2	1.01689	0.00278241	0.0266787	6.23334	5.21645	6.00109	5.62992	6.18137	7.00475	5.34695	7.64555	6.01896	7.54162	5.28133	5.68187	5.3418	4.98907	5.09582	6.35343	5.08461	4.68272	4.67024	5.1154	5.13145	5.69998
KRI1	0.822192	0.000984077	0.0128298	5.91806	5.09587	6.48656	6.31351	5.56847	5.36047	6.31582	5.61618	6.1338	5.89397	5.3792	6.11263	5.61685	5.17854	5.02639	6.11948	5.18343	5.23499	4.00356	5.00445	5.05296	4.53802
KRT14	1.10911	0.0341789	0.150269	3.67712	2.56801	3.00694	2.88937	5.24948	7.29166	2.31144	3.76263	2.5508	3.48958	2.02976	4.18952	2.25388	1.97935	2.9663	3.08477	2.30651	2.62177	1.8357	3.05544	2.86208	2.71425
KRT4	0.88698	0.0175288	0.095835	4.76073	3.87375	5.94263	3.89127	4.04895	6.53372	4.03358	6.23846	4.14447	4.72764	3.74212	4.30443	3.80101	3.88746	3.62829	5.08885	3.87756	3.63293	3.9204	3.7295	3.54268	3.62879
KRT5	0.824393	0.0279412	0.131444	5.58708	4.76269	6.07767	4.20356	7.16403	5.23971	4.28239	4.64485	7.11322	5.4241	5.85968	5.8616	4.81608	4.44467	5.21249	5.91459	4.66538	4.26692	4.45803	4.71977	5.00284	4.12613
KRT6A	1.3269	0.00179324	0.0195184	4.82992	3.50302	4.94565	5.61901	6.55761	6.45347	3.44633	5.86989	4.02043	4.22574	3.33038	3.83064	3.56736	3.4495	3.96466	3.65262	3.30572	3.39543	3.34367	3.37513	3.25887	3.71721
KRT7	1.28441	6.74132e-06	0.000340075	5.38831	4.1039	5.15472	4.61999	6.00395	5.58125	5.33024	5.45659	6.13662	4.83694	4.85581	5.90699	4.49312	3.64555	3.93713	3.41303	4.39277	3.82185	4.12124	3.76655	4.55214	4.89566
KRT8	1.26438	4.61395e-05	0.00141325	9.19116	7.92677	9.90581	9.06215	9.07401	8.76527	8.71497	10.2391	9.50622	9.05096	8.93401	8.65913	8.49651	7.36747	7.97284	9.12806	7.99685	7.36873	7.58436	7.17455	7.69164	8.48673
L1CAM	1.56786	0.000173563	0.00373487	5.47748	3.90962	5.46225	4.73423	6.01807	5.78315	3.94201	6.52676	6.20657	4.89083	4.43739	6.77358	3.20516	3.62752	3.50587	5.65862	4.02264	3.76144	3.93684	3.88592	3.64113	3.85105
LACTB2	1.17738	0.0155861	0.0883905	5.27534	4.09795	4.43717	5.02733	4.502	6.62746	6.16474	6.65853	4.66024	3.53711	6.05092	5.08786	3.07588	5.70245	5.11507	1.86105	4.21807	4.78914	3.88063	3.71798	4.52625	4.09302
LAGE3	1.73638	5.6358e-07	5.79738e-05	7.17222	5.43584	7.03233	7.79406	7.05753	8.70112	6.84472	7.60574	6.89374	6.30654	7.41164	6.07479	5.05218	5.69363	5.876	5.18215	5.53089	5.57906	5.40736	4.98274	5.5272	5.5272
LAMA5	1.35508	0.000197442	0.00410477	8.69618	7.3411	9.98826	9.24732	7.97284	8.19197	8.66759	8.18499	10.0675	7.9209	7.34226	9.37822	7.70138	6.80355	7.16403	7.90993	6.97767	7.40502	6.87528	7.39868	7.58918	7.58628
LAMB1	0.949921	0.0202058	0.105635	4.83485	3.88493	6.06668	5.27222	2.99687	6.42248	4.47521	4.96812	3.93236	4.5387	4.85664	4.81926	2.87206	4.93221	4.16832	2.59497	4.10257	3.17695	3.5172	4.22623	4.80272	4.45611
LAMB2	0.791301	0.00548613	0.0430472	7.61824	6.82694	8.02165	7.7185	7.66811	6.97395	7.39452	7.27281	8.39891	7.54967	7.49261	7.69164	7.61134	6.89245	7.16094	5.17134	7.16403	6.78929	5.84592	7.11777	7.18626	7.33002
LAMC1	1.1234	3.5603e-05	0.00116899	8.47564	7.35224	8.57393	8.65422	8.48673	8.68065	8.02999	9.11497	8.69944	7.61324	8.43434	8.46889	7.00747	7.8252	7.89975	8.38822	6.80695	7.3116	6.72583	6.74986	7.1265	7.68103
LAMP5	1.1463	0.0445186	0.179629	7.10122	5.95492	7.53427	5.34564	4.86278	7.47166	5.50672	7.65545	10.0174	8.27867	6.68215	7.65746	5.23033	6.80406	6.51833	4.09017	6.85834	5.26214	7.12023	5.83594	6.25967	5.57002
LAMTOR1	0.756402	0.00604345	0.0461386	6.32604	5.56964	6.9732	6.79122	6.52089	5.86442	6.4932	5.95603	6.50816	5.6332	5.86298	6.6571	5.28923	5.61966	5.87771	3.77126	5.73088	5.66072	6.09942	5.64142	5.96701	6.03908
LAMTOR2	0.790127	0.00118085	0.014573	5.72096	4.93083	6.03747	5.68997	5.97102	6.87139	6.26659	5.2503	5.30338	5.23553	5.60818	4.97575	4.95094	5.0694	5.26755	4.03249	5.08758	5.29843	4.96812	5.16768	4.78652	4.67961
LAPTM4B	1.23682	0.00240596	0.0241349	7.86693	6.63011	6.93451	9.39219	7.16532	8.81204	8.30772	7.96103	7.21877	6.57356	8.79886	7.50528	5.8465	8.09143	7.62834	6.04639	6.02759	6.3262	7.16465	6.12281	6.44768	6.59947
LDB1	0.726126	0.0115048	0.0716274	6.4496	5.72347	6.54952	6.01839	6.20183	6.514	6.24648	6.16874	6.51344	7.02346	5.70893	7.5512	6.13098	5.63641	5.28955	7.22509	5.82097	5.35728	4.74651	5.1031	5.76625	6.15858
LDHB	0.596043	0.0277816	0.131071	10.7292	10.1332	10.7225	11.0847	10.0799	12.1055	11.2458	9.44312	10.1679	11.4072	10.9033	10.1322	10.0275	10.7225	10.108	9.92651	10.0613	9.73453	9.91593	10.2742	10.1679	10.3934
LDOC1	0.866545	0.000229567	0.00459169	8.34483	7.47829	8.2511	9.67273	8.60651	8.48548	7.96299	8.14347	8.10406	7.99891	7.923	8.30009	7.51214	7.78387	7.7694	7.57229	7.77821	7.09903	6.68509	7.25615	7.68678	7.63994
LEPRE1	0.875105	0.00359465	0.0318419	6.07709	5.20199	7.4963	5.77055	5.88452	6.40069	6.59338	6.2842	5.67392	5.79856	5.82058	5.04821	5.53221	5.21737	5.27437	3.72868	5.73065	4.88859	5.25842	5.12825	5.81095	5.45036
LEPREL4	1.1576	0.000104152	0.00254251	6.26425	5.10665	5.90074	5.60504	5.85649	7.4837	6.66509	6.20077	6.49153	6.74576	5.22266	6.47071	5.41992	5.09918	5.07309	4.11654	5.37483	4.53645	5.11943	5.21903	5.71435	5.39367
LGALS1	1.10527	0.000822938	0.0113351	6.75249	5.64721	6.12139	6.31648	6.66053	7.65461	7.85569	7.38453	6.65516	6.15572	6.84998	5.87079	5.84096	5.92191	6.17653	4.68173	5.51937	5.34815	4.94311	5.96736	5.18597	6.88703
LHX1	2.01827	0.00125493	0.0151643	5.31181	3.29355	5.46472	3.00226	3.88245	6.23234	5.71822	4.62791	8.82723	5.07096	3.30003	6.99201	2.98788	3.43034	3.64712	2.29121	3.34498	3.34531	3.18628	3.73131	3.98295	2.9881
LHX6	0.749401	0.00295075	0.027696	4.85781	4.10841	4.78141	4.24744	4.93817	4.79556	4.37163	5.81411	5.30177	5.07637	5.04573	4.20594	3.65404	3.82066	4.00062	5.35014	3.66198	3.99357	4.70204	3.98646	3.7779	4.13671
LIG1	0.604822	0.0398497	0.166902	6.92228	6.31745	8.68909	6.30233	6.4227	7.3116	6.90663	6.53557	7.30967	6.98288	6.30233	6.45996	6.57067	5.77856	5.75476	7.53091	6.66938	6.40699	5.86989	5.93599	6.5661	6.09128
LIN37	1.39886	0.00109115	0.0137846	5.68027	4.28141	7.27135	5.22977	5.41345	5.57052	6.28321	4.9408	6.54746	6.16963	4.56182	4.81464	3.73812	3.78561	4.0855	2.24209	4.7271	4.67557	4.52073	5.50418	4.8078	4.72735
LINC00115	1.4281	0.00228418	0.0231751	4.00889	2.58079	3.47778	4.23145	5.37483	4.403	2.79706	3.43864	2.97104	6.74778	3.02791	3.61939	2.40951	2.6804	2.08496	1.72781	2.06194	2.59581	3.8332	2.66479	3.30068	2.44881
LINC00282	1.10888	0.000176981	0.00378098	3.80099	2.69211	3.56542	3.39852	4.78844	4.44037	4.18662	2.77022	4.7776	3.68462	3.72684	2.67129	2.8365	2.53958	2.52223	3.18628	2.70369	2.35115	2.6399	2.44345	3.15645	2.54188
LINC00328	0.923003	0.0147463	0.0853193	2.95754	2.03454	4.50233	1.63296	2.09277	4.49159	3.8234	3.54127	2.19221	3.55951	1.87882	1.86052	1.85616	2.126	2.23975	1.98369	2.3328	2.27682	1.51641	1.93634	1.94374	2.13364
LINC00622	1.13074	0.000266594	0.0051069	4.0724	2.94166	4.15692	2.74982	3.97677	4.91182	3.72465	3.93653	3.97278	4.53385	4.86206	3.89874	2.59663	3.98765	3.36966	2.64674	2.9096	2.41537	2.00611	2.92605	3.60335	2.95538
LINC00648	1.77169	0.0090174	0.0615313	4.10892	2.33723	6.74012	2.36208	2.32946	2.62147	2.76963	2.57528	5.68299	8.04486	4.35	3.6133	3.05693	1.91379	2.39666	2.00218	2.19735	2.29121	2.27768	2.55294	2.81491	1.86869
LINC00664	0.636042	0.000763854	0.0107741	2.77775	2.14171	2.62066	2.83289	3.01177	2.39666	3.02093	3.10713	2.33934	2.7463	2.38093	3.32085	2.20304	2.40254	2.09993	3.03921	1.75909	2.12135	2.07493	2.12341	1.88647	1.70708
LINC01128	0.781064	0.0405613	0.168849	6.33964	5.55858	5.51204	6.62186	6.9137	5.10133	4.95048	7.16153	6.15888	8.64419	6.13291	6.19948	6.00252	5.70809	5.74249	4.79623	5.74405	6.21493	4.7757	5.60459	5.93986	5.0573
LINC01296	1.19889	0.00342941	0.0309638	4.71884	3.51995	5.27332	3.76752	3.1341	4.61106	3.52896	4.929	5.92019	6.96147	3.96075	5.10208	3.80777	3.36651	3.41226	4.3567	3.33389	3.43421	3.4135	3.48128	3.237	3.35639
LIPG	0.892595	0.0162463	0.0908953	3.4827	2.5901	3.38026	4.2643	5.39544	2.85769	2.25409	3.78086	3.73155	2.34026	4.48914	2.33339	2.3793	3.26245	2.45491	1.948	2.44688	2.13987	2.53898	2.77111	3.36857	2.59096
LMNB1	1.93375	1.2126e-05	0.000526327	6.54834	4.61459	7.47811	7.36164	7.02887	7.58794	6.28321	4.81698	6.44768	5.40484	7.24623	5.82785	5.47748	4.87586	4.22485	3.63523	4.18771	3.83802	5.2608	4.70782	5.04384	4.89426
LMNB2	0.685194	0.00881282	0.0605473	5.36785	4.68265	5.88726	6.18335	4.9178	5.06704	6.08157	5.39981	4.43796	5.50946	5.57858	4.61563	5.03514	5.05624	4.5348	4.97145	3.79374	3.83103	5.03315	4.69345	4.71822	5.15929
LMO3	1.00706	0.000625879	0.00933625	3.58037	2.57331	3.36612	3.49672	2.71425	4.39487	2.69145	2.9785	4.73811	2.78302	4.35948	4.28121	2.30355	2.47072	2.31817	2.83353	2.5333	2.46227	2.56469	2.49401	2.74361	3.00927
LMO4	0.829499	0.0122126	0.0748914	6.32969	5.5002	5.43074	6.16339	5.42229	6.66509	8.09143	5.46546	6.13038	5.85901	6.85552	7.21365	5.57584	5.51528	5.58756	4.77871	5.91222	5.38909	4.76808	5.38967	5.62894	6.45656
LOC100129098	0.91542	0.00779722	0.0552606	6.88095	5.96553	6.72814	6.17028	6.97016	6.2127	7.87172	6.10567	7.77869	7.01263	6.30787	7.65161	5.64561	6.36104	5.90214	7.95521	5.99235	5.74582	5.73454	5.81095	5.35567	5.15193
LOC100129361	0.730746	0.00811628	0.056977	7.91227	7.18152	8.03884	7.30078	8.01991	8.27985	7.75101	7.01065	7.99891	9.44576	7.42334	7.85363	6.09128	7.53569	7.15985	6.7233	7.08646	7.37003	7.89007	7.28562	7.37569	7.29721
LOC100129455	0.709877	0.0445259	0.179629	3.602	2.89212	2.80703	6.0552	2.75423	4.15376	3.01545	4.40632	3.02714	3.29978	3.54114	2.95991	3.21255	3.59965	2.99475	2.2632	2.81602	2.8917	2.58652	3.2082	2.2876	3.06101
LOC100289561	0.613264	0.0025268	0.0249124	7.5527	6.93943	7.48679	7.93756	7.46541	7.45156	8.40008	7.61408	8.15403	6.79387	6.77784	7.44573	7.2364	6.81535	6.61768	7.25972	7.15558	6.60203	6.84413	7.05014	6.91491	6.89836
LOC100507535	1.1848	0.000149575	0.00333501	6.37179	5.187	7.73516	5.54944	5.23181	5.6537	6.97484	6.39268	6.68215	7.13811	6.22283	6.13724	5.51204	5.40397	5.56615	4.85664	5.28449	4.73701	5.13663	4.91388	4.85098	5.60818
LOC100652930	0.916402	0.000225774	0.00453998	6.26089	5.34449	7.26946	6.4029	5.78121	5.60366	6.93503	5.87022	6.87925	6.19948	5.18889	6.47882	5.57371	5.2503	5.20888	5.50712	5.29456	5.41665	5.24704	5.39718	5.22352	5.32596
LOC100996696	1.24112	5.16456e-05	0.00153693	9.29159	8.05047	9.82113	9.19445	9.32179	8.30772	9.93533	9.54597	8.92582	9.94373	8.24727	9.67273	8.18769	8.03619	7.97918	8.91397	7.63717	7.76444	7.90429	7.21514	8.05684	8.80985
LOC101060373	0.65172	4.06305e-05	0.0012843	8.08213	7.43041	8.47697	8.33881	7.86869	8.35859	8.32427	7.7973	7.9269	7.75101	8.09375	7.88502	7.40265	7.93572	7.5435	6.93503	7.46294	7.46144	7.26659	7.29483	7.62312	7.37827
LOC101927151	0.923431	6.14362e-07	6.10792e-05	6.46954	5.54611	6.0811	6.32586	6.671	6.29261	6.69773	6.49695	6.50853	6.68538	6.23596	6.7003	5.98823	5.79668	5.58216	4.90805	5.31873	5.16543	5.58915	5.71822	5.67185	5.7226
LOC101927701	1.03918	0.00111734	0.0140326	3.43358	2.3944	5.51166	2.99036	3.27598	3.59901	3.00334	4.20714	3.25764	2.68726	2.66758	3.13583	2.32007	2.56444	1.85796	2.98694	2.30023	2.30757	2.31413	2.73748	2.42969	2.12547
LOC101928589	0.779144	0.0138142	0.0813494	6.60823	5.82909	5.92595	5.61423	6.80452	6.75925	8.35859	7.27761	6.60069	6.15829	5.88391	6.69928	5.67018	6.1118	6.10316	4.38554	5.93689	5.85263	5.80219	6.18377	6.24277	6.00195
LOC101928717	0.673429	0.00100992	0.0130968	4.85247	4.17904	5.1066	5.01101	4.12412	4.71858	5.10113	4.62504	5.43683	4.7019	4.57578	5.12373	4.31782	3.97095	4.09699	5.15624	3.68401	3.66634	4.10223	4.18753	4.37653	4.2318
LOC101929232	0.907485	0.00519203	0.0417144	4.52871	3.62123	5.00384	3.56575	5.34848	3.92003	3.97938	3.59468	4.53627	5.92019	5.19876	4.21974	3.8302	3.39701	3.60711	3.08708	4.87442	3.85887	3.32644	3.69116	3.60579	2.93418
LOC101929336	0.647798	0.0024884	0.0247119	4.84551	4.19771	4.82883	5.01483	4.78914	4.56796	5.37625	4.69369	4.33613	5.35123	4.73294	4.76408	4.19403	4.22856	4.19892	3.18606	4.56664	3.43614	4.41181	4.48638	4.8665	4.40208
LOC102724884	0.929125	0.00129769	0.0155618	8.46455	7.53543	8.90802	7.69832	8.16925	9.11703	9.21235	7.96217	8.32947	8.21734	7.87372	9.15784	8.06264	7.97918	7.49353	6.35559	7.78085	7.60816	8.18638	7.18231	7.88502	6.8206
LOC150051	0.802198	0.0053272	0.0423038	4.1512	3.349	5.37951	4.14469	3.69464	4.04557	3.25585	4.75979	4.19096	4.01553	4.00941	4.01608	2.78145	3.02947	3.29948	4.90082	3.82093	3.13206	3.07121	3.38482	2.71574	3.35406
LOC150776	0.713591	0.0167083	0.0926872	7.06241	6.34882	7.97393	8.20348	7.11597	5.85581	7.25972	6.60974	6.22029	7.54916	6.7822	7.05382	6.66938	5.95068	6.30624	5.33502	6.85653	6.1294	5.85901	6.57024	7.11059	6.70112
LOC157562	0.790869	0.00210887	0.0218958	4.99074	4.19987	4.88692	6.01111	4.77095	4.9842	5.3681	4.21576	4.38807	5.84537	5.26434	4.17256	4.15196	4.14576	3.87499	4.0073	3.89796	5.03845	4.46541	4.45444	4.14025	3.82217
LOC284513	1.16678	0.0034669	0.0312074	6.52345	5.35666	6.70319	6.6816	6.9628	5.91368	6.20077	6.80029	5.63101	7.88591	6.0826	6.37263	5.72576	6.08803	4.82245	3.0043	5.66722	5.16982	5.89492	5.93107	6.5298	4.73328
LOC375196	0.737044	0.0102868	0.0663717	3.15121	2.41416	4.11221	2.53989	2.3456	2.51987	2.65233	4.08716	3.23979	4.50521	2.49542	3.01461	2.23932	2.34576	1.98159	1.89653	2.54379	2.59581	2.98462	2.31118	2.57796	2.66507
LOC645166	0.82553	0.0181806	0.0981026	5.36088	4.53535	6.02058	5.0607	4.86627	5.90827	4.03156	6.45281	6.34778	4.70396	4.36887	5.84798	3.68983	4.09585	3.65671	4.07132	4.81972	5.42201	4.92391	4.93386	4.38373	5.35655
LOXL1	0.876066	0.00763198	0.054371	5.04816	4.17209	5.64779	4.60036	5.54667	5.87526	5.0921	4.85258	5.27373	3.96146	3.82066	5.81095	3.66783	3.69464	4.30033	5.42666	3.72278	3.83827	3.32229	4.38255	4.32381	5.04174
LPCAT1	1.47362	5.04642e-07	5.39893e-05	8.04932	6.5757	8.11682	7.68582	8.22597	8.23654	8.59029	8.31429	8.58455	8.2416	7.5512	6.94613	6.20834	6.58582	6.59468	7.21736	6.22229	6.00395	6.24697	6.47953	6.97927	7.21877
LRFN4	0.951228	0.00133905	0.0159289	5.83407	4.88284	7.29559	6.69467	5.90318	4.87783	5.95832	5.46421	5.33981	5.86006	5.04942	5.89759	5.32023	4.86308	4.71913	5.37074	5.25717	4.42412	5.13601	5.06737	4.63446	4.03608
LRPPRC	0.701226	0.00037506	0.00655475	7.83945	7.13823	7.697	7.16353	8.67836	7.67446	7.41011	7.81184	7.74257	8.01027	7.85049	8.35591	7.51072	7.253	7.03051	6.52359	7.11777	6.98747	7.16968	6.94546	7.41798	7.4261
LRRC14	0.76033	0.00560708	0.0437455	5.59806	4.83773	5.78445	5.88707	5.17442	5.67431	6.04923	5.79923	5.75577	5.26808	4.88321	5.70486	4.47014	4.19096	4.45582	6.70643	5.02091	4.83681	4.41264	5.11943	4.34955	4.81464
LRRC20	0.678593	0.00055062	0.00851332	5.24624	4.56764	5.87022	5.65169	5.24079	5.57331	5.21097	5.20564	5.27759	4.80867	5.1818	4.44168	4.313	4.64766	4.34274	5.31735	4.58482	4.68713	4.5589	4.66998	4.51369	4.04114
LRRC41	0.744887	0.0410238	0.170059	4.13561	3.39072	7.13517	4.59014	3.75423	3.51541	3.99983	4.1034	4.10021	3.48508	3.26157	3.41102	3.71798	3.59026	3.51399	3.05746	3.37601	3.22313	3.25535	3.28815	3.46891	3.41596
LRRC8D	0.808966	0.000107139	0.00259409	7.77741	6.96844	7.41164	7.4563	7.83066	8.40594	7.96794	7.6818	8.0516	7.44387	7.75841	7.76593	7.08838	7.22585	6.84035	5.78772	6.94188	7.15616	6.9428	7.27281	7.26317	7.16532
LSG1	0.849725	0.000958017	0.0126663	7.52897	6.67924	8.07161	7.3577	6.78734	8.11682	8.02909	6.75654	7.50284	7.39777	8.12926	7.14072	7.1448	6.46889	5.97991	7.71371	6.99152	6.46139	6.48277	6.50897	6.63981	6.40069
LSM14B	0.695811	0.00243448	0.0243393	4.82086	4.12505	5.21425	4.24631	4.52876	4.55238	5.58951	4.38113	4.62426	5.52189	4.36347	5.18659	3.83347	4.62188	3.95984	4.42158	3.97957	4.11153	3.52979	4.52741	4.66621	3.59917
LSM4	0.935847	5.29387e-07	5.50934e-05	5.6864	4.75055	5.91805	5.9277	5.65692	5.80867	6.19717	5.58125	5.50672	4.95573	5.52119	5.79061	4.39042	4.96144	4.7527	4.39243	4.76679	4.80829	4.74537	4.86551	4.78621	5.03639
LSM8	1.08908	0.000429356	0.00722195	6.11919	5.03012	5.95485	5.4866	5.95986	6.78547	6.27359	6.6705	5.11507	5.4546	6.15733	7.33406	5.05879	5.56279	5.20327	3.63581	5.20606	5.10338	5.02362	4.961	5.02776	5.51868
LSR	0.920603	0.00383628	0.033254	5.93474	5.01414	7.04887	4.93488	5.54194	5.92595	6.16536	5.86889	6.99802	6.59512	4.27294	5.99541	5.08758	4.42502	5.146	4.84687	5.22382	4.97427	4.70204	4.89704	5.03566	5.80306
LTBP1	0.782278	0.0433463	0.176504	7.12757	6.34529	7.43813	5.48017	8.46889	7.16403	6.12812	7.57314	6.37403	8.29451	7.93663	6.41805	6.91659	7.51376	6.34642	4.91704	6.33621	6.01063	5.83683	6.57067	6.1143	6.89046
LTBP2	1.31547	7.0553e-05	0.00191689	6.75269	5.43722	6.19012	5.74203	6.8891	7.34022	6.32698	7.16094	6.81016	6.5875	7.71182	6.76804	5.9678	5.25564	5.46843	4.20858	4.97931	5.28542	4.78259	6.07789	6.06494	6.28164
LTBP3	1.49389	0.00112856	0.0141635	6.97566	5.48177	6.93414	7.83654	5.91934	6.78734	6.73985	7.04257	8.46397	6.92141	5.87022	7.24125	5.6014	5.25409	6.23336	2.85913	5.36171	5.95116	4.87509	5.96196	5.80615	6.9137
LY6E	1.21568	0.00352958	0.031485	6.85239	5.63671	8.01991	8.85664	6.5417	5.2686	6.96864	7.62082	7.61716	5.67623	6.35672	5.59747	5.66616	5.75202	6.05986	5.31151	5.98207	4.92658	5.36387	5.24116	6.1338	5.93003
LY6K	0.700311	0.0144023	0.0840089	3.45466	2.75435	4.28928	2.50242	4.85744	3.34588	2.76187	2.81468	3.25792	2.74158	4.50361	3.47197	2.6779	2.67208	2.59339	3.435	2.70745	2.82681	2.53282	2.66981	2.49761	2.93067
LYAR	0.791891	0.00140464	0.0165102	7.0297	6.23781	7.31264	7.37003	7.60001	6.90883	7.58918	6.82271	6.9607	7.10888	6.4657	6.15829	6.88098	6.15069	5.78272	5.45134	6.78929	5.91986	5.64259	6.42931	6.51789	6.8134
LZTS3	1.72953	3.65235e-05	0.00119261	9.01089	7.28136	8.73768	8.83964	8.45721	7.4941	10.4606	9.04266	10.0909	8.02165	8.44752	10.517	7.46294	6.58639	7.41424	7.60718	7.37484	6.99944	6.9298	6.88039	7.83476	7.72366
MACC1	0.600677	0.0221048	0.112446	3.4575	2.85682	3.97248	3.37353	3.40705	4.32786	2.02866	4.58236	3.26467	2.81149	3.69464	3.11221	3.0181	3.25097	3.10417	2.60284	2.78024	2.46187	3.25597	2.49905	2.68237	2.91261
MAD1L1	0.609911	0.0307137	0.140216	4.24519	3.63528	5.50041	4.86206	4.23694	4.116	3.51951	3.4201	4.3323	3.79784	4.6188	4.0479	3.8357	3.83064	3.90421	2.60706	4.51261	3.12642	3.35892	4.13093	2.94165	4.1046
MAD2L2	1.24118	0.000243568	0.00478425	5.27703	4.03584	6.15509	6.34869	4.94375	5.10879	5.42992	5.54857	4.93848	4.34464	5.89783	4.05452	4.2219	4.36322	4.67534	4.64284	3.20433	4.39767	3.41026	3.32864	3.74921	4.36502
MAF1	0.971583	2.79002e-05	0.000977387	6.96999	5.99841	7.32223	8.17482	6.45433	6.47488	7.0913	6.97395	6.89191	6.44572	7.11597	6.7548	5.82997	5.89066	6.15289	6.19717	5.75114	5.99984	6.18969	5.83159	5.63857	6.50255
MAGEA1	1.008	0.0401602	0.167772	3.44788	2.43988	3.28621	6.74118	2.68858	2.98014	2.11803	2.60936	2.35712	2.44401	5.41687	3.83727	3.03264	2.29424	2.33814	2.90178	2.03061	2.32222	1.79843	2.62339	2.27228	2.78503
MAGEA11	1.60037	0.00790729	0.0558405	3.51179	1.91142	5.18659	2.21867	2.04195	1.802	2.23477	2.51967	6.54352	5.12486	1.98114	5.46472	1.58098	2.15059	1.78858	1.70615	2.03136	1.97806	2.30588	1.99628	1.86237	1.71392
MAGEA4	1.31677	0.0137583	0.0811463	3.60718	2.29041	3.09022	1.85332	2.13218	5.40941	2.5499	2.01243	3.8996	3.96259	5.78082	5.38134	2.13838	1.79017	1.57368	4.04067	1.89595	2.11965	2.35237	2.47572	2.33508	2.18241
MAGEA6	1.42211	0.0437412	0.177559	3.59747	2.17536	6.49639	2.05866	2.01961	8.80334	2.48474	3.15112	2.67074	2.82581	2.76763	2.69672	1.90532	1.99932	1.90562	2.78393	2.25357	2.23647	2.06163	2.22804	2.36607	2.01364
MAGED2	0.783527	0.000265116	0.00508406	7.78117	6.99764	8.71221	7.03316	7.82124	7.81409	7.93022	7.56293	8.39364	7.84417	7.15163	7.54839	6.85653	7.16745	7.12187	6.34697	7.23586	6.96462	6.89759	7.07346	7.15053	7.16153
MAGED4	0.914807	0.00901619	0.0615313	6.39295	5.47814	8.63977	5.85263	6.39042	6.83616	5.25173	7.00747	6.17823	5.59582	5.85263	6.32459	5.49978	5.55211	5.59137	4.86278	5.91986	4.45988	5.82694	5.51091	5.72417	5.83359
MAGEF1	0.610829	0.0143667	0.0839125	7.17776	6.56693	7.68797	6.89537	7.04257	8.05054	7.51698	6.19362	6.50675	7.36664	7.83233	6.6848	6.28091	7.52192	6.73774	6.60203	6.09539	6.20433	6.56999	6.60203	6.92554	6.1294
MAL	3.52735	6.03909e-06	0.000309539	8.85218	5.32483	5.67392	8.78349	9.70497	10.9576	10.858	7.47101	8.64295	6.51563	9.48119	10.4331	4.74204	5.61056	5.65503	6.10398	4.79035	4.4963	4.44467	4.99783	5.33859	7.06899
MALL	0.775287	0.00976214	0.0642219	4.98453	4.20924	4.17136	6.08628	3.89038	5.40736	5.04573	6.61672	5.12223	4.48988	4.67489	4.34043	3.73714	4.4094	4.23493	4.31248	3.89069	4.36732	4.31136	4.66805	4.02043	4.14061
MAN2B1	0.908869	0.00461514	0.0381827	7.40695	6.49808	7.16532	6.85834	7.10196	7.98572	6.98407	7.09045	8.3553	6.76316	6.7548	9.01041	6.71717	5.85968	6.44846	7.05091	6.42644	6.33886	5.54248	6.26842	6.89836	7.43005
MAP1S	1.06631	0.00544647	0.0428305	4.93916	3.87285	6.44539	6.07303	4.69401	4.81041	4.16045	4.11153	5.54358	5.08133	3.81974	4.65215	3.90373	3.31094	4.63405	1.96024	4.12744	4.361	4.39658	4.13388	3.74212	4.1585
MAP3K9	0.703707	0.000957896	0.0126663	5.29006	4.58635	5.19302	4.75707	5.641	5.54297	4.91079	5.49629	5.52264	5.53327	5.03019	5.27332	4.36759	4.74961	4.92658	3.53887	4.39243	4.88076	5.11861	4.31164	5.23742	4.33996
MAP4K1	1.1974	0.00414568	0.0352943	5.662	4.46461	7.42691	4.502	4.92658	5.94499	4.58183	6.19662	6.11333	6.94546	4.38595	5.59633	4.61978	3.85075	4.1323	5.9058	4.14853	4.05147	4.0686	4.20325	4.25506	5.41052
MAP4K2	0.620938	0.0103477	0.0665344	3.54941	2.92847	4.13975	4.02344	3.10586	3.3794	3.57738	2.77944	4.35195	3.13422	2.84218	4.16045	2.79188	2.45711	3.72001	3.42435	2.29488	3.09928	2.78568	2.88505	3.00905	2.81739
MAP7D1	0.951502	0.00192127	0.0204491	6.33766	5.38616	7.24282	6.73107	5.62215	6.59512	6.4639	5.55937	5.62974	7.2722	6.74894	5.51127	6.34741	5.68524	5.6014	5.66562	4.84612	4.74179	4.57631	5.18309	5.42378	5.79081
MAPK13	0.819532	0.0015528	0.0176642	5.43324	4.61371	5.51251	5.48545	5.64862	5.52689	6.16339	5.06376	5.8582	5.51724	4.72956	4.8268	4.05274	5.74042	5.43406	4.23886	4.18981	4.96206	4.28094	4.47742	4.6771	4.08368
MAPKAPK5	0.854559	0.0358342	0.155648	4.80651	3.95195	6.56424	6.53453	4.20137	5.04311	4.55312	3.90197	3.5894	4.08859	4.59709	4.99169	3.91391	3.86377	4.24233	2.21585	3.82714	3.68983	5.27592	4.08044	3.89664	4.51369
MARC1	0.6744	0.0178814	0.0970767	5.76599	5.09159	7.29721	5.47284	6.15069	4.96535	5.40174	5.38909	5.05374	6.45771	5.68672	5.7848	5.21491	5.36933	4.71274	6.07446	4.74013	4.24487	5.45621	4.76655	5.2073	5.12939
MARCH5	0.616957	0.0117885	0.072996	5.57809	4.96114	5.62371	5.94827	6.05716	5.56691	5.33702	5.21706	4.66579	6.26227	6.48277	4.61999	4.54852	5.39335	5.40689	4.84435	4.40534	4.8849	5.17887	4.69088	4.84518	5.41311
MARCKSL1	1.8991	4.69737e-07	5.1922e-05	9.57455	7.67545	10.7133	9.27948	10.3934	9.71241	9.07901	8.83964	9.35967	9.43172	9.73039	9.20643	8.11682	7.95846	7.36338	8.21863	7.30332	6.43135	8.12403	7.0251	7.61716	8.59623
MARS	0.858056	0.0219637	0.111932	6.61039	5.75234	7.14964	6.22283	6.57849	6.76614	5.75294	6.46945	7.45316	7.45084	5.92537	6.33509	5.68954	5.51012	5.36853	8.43068	5.42378	5.54902	5.16512	5.39752	4.85581	6.13326
MAVS	1.0371	0.0101587	0.0659077	6.52658	5.48948	6.09478	5.53826	6.42711	7.22416	7.05926	5.92812	6.733	6.8432	5.85581	7.56208	5.83359	4.68972	5.33309	2.93641	6.1741	5.93498	5.72809	6.40936	6.39074	5.46472
MCAM	1.08307	1.58911e-06	0.00011983	5.95907	4.876	6.69352	6.18427	5.1154	5.90796	5.54218	5.73769	6.25659	5.96869	6.05897	6.12544	4.96961	5.09482	5.09116	5.23707	4.59562	4.65975	4.30215	4.76408	4.95048	5.09525
MCM10	1.28257	0.000412169	0.0070099	4.62711	3.34453	4.78946	7.01199	4.52625	4.88993	5.01589	3.97501	3.98268	3.94506	4.64693	3.48786	3.14577	3.57609	3.37981	3.89778	2.99652	3.25853	3.57654	2.94632	3.15747	3.5105
MCM2	1.9078	1.92627e-06	0.000138226	8.4168	6.509	8.77915	8.95984	8.29096	9.10335	8.45425	8.38306	8.29686	7.8658	8.73399	7.30078	5.91099	7.29112	6.94001	4.56694	6.1958	6.98231	7.27623	6.83046	6.44723	6.64892
MCM3	1.14194	0.000406256	0.00692544	7.22042	6.07848	8.86401	8.32817	7.31584	6.57975	7.13338	6.75399	6.37158	7.27885	6.788	6.79066	6.23293	6.27454	5.92258	5.01705	6.11372	6.04837	6.60689	6.05066	6.05951	6.45859
MCM3AP-AS1	0.753289	0.0063322	0.0475075	4.0101	3.25681	4.54077	4.42045	4.17199	2.5514	4.55589	3.45948	3.85441	3.96779	4.12645	4.45238	3.78359	2.6943	2.79682	2.30181	3.85272	2.9426	3.39294	3.45455	3.59715	3.75164
MCM4	1.19609	3.42634e-07	4.29402e-05	4.70512	3.50904	4.98641	4.88076	4.45362	4.70692	5.18388	4.67076	4.5384	4.15554	5.14196	4.333	3.24672	3.85003	3.43793	2.75858	3.59948	3.41986	4.11493	3.27025	3.52576	3.86682
MCM5	1.04513	0.00324753	0.0297903	5.91812	4.87299	6.60469	6.29368	5.77808	6.59992	6.46776	5.16618	6.26918	5.11104	5.94499	4.94565	4.69493	5.22883	5.41345	2.70661	4.80298	5.37853	4.71431	5.15657	4.91151	5.72217
MCM6	2.24221	5.01941e-07	5.39893e-05	8.3625	6.1203	7.4837	8.78976	8.05901	8.45302	9.53512	8.65765	7.43931	8.45191	8.65913	8.09643	5.95504	6.69804	6.36816	4.01059	5.7108	6.02946	6.37356	6.25659	6.90453	6.89622
MCM7	1.72845	3.16567e-06	0.000194263	7.52957	5.80112	8.08317	8.87968	7.41011	7.3475	8.49798	6.8838	7.7817	7.08325	7.06879	6.25967	6.06268	5.61552	5.90527	4.71034	6.27188	5.43439	6.02709	5.86546	5.99044	6.12812
MCRS1	0.710835	0.00212757	0.0219874	5.44661	4.73578	6.60577	5.97845	5.25298	4.82883	5.14149	4.8281	5.69563	5.42555	4.90115	5.80818	4.90315	4.98866	4.8135	4.24289	4.67534	5.25877	4.84042	4.55515	4.27094	4.80898
MCUR1	0.963808	0.00045703	0.00756587	7.07604	6.11223	7.28081	6.54952	6.56735	7.175	7.88683	6.29905	8.03884	6.63542	6.92891	7.39868	5.7709	6.59393	6.99519	6.43291	5.68954	6.17682	6.02495	5.46621	5.62735	6.34452
MDK	1.01677	0.00925652	0.0624117	5.89792	4.88115	5.93956	5.93107	3.35037	5.25877	6.92464	7.05825	7.04444	5.663	6.31137	5.49777	4.24776	4.75306	5.0916	5.52689	4.88003	5.14984	4.99946	4.48111	4.29891	5.38286
MED10	0.649782	0.000974527	0.0127681	6.78068	6.1309	5.89835	7.1583	6.49202	6.97844	6.63981	7.28306	6.48202	6.87301	7.1448	6.85703	6.2285	6.79767	6.33984	5.89997	6.41044	6.20337	5.95696	5.58305	6.02294	5.86627
MED22	0.650395	0.008356	0.0582237	4.4609	3.81051	4.44557	5.54218	3.90504	4.42645	5.25273	4.61645	4.31782	3.99033	4.20913	3.90332	3.68212	4.00681	3.82287	2.79132	3.53031	4.18632	4.12516	4.31029	3.38141	4.26845
MED8	0.988709	0.000234786	0.00466462	5.50796	4.51926	6.10436	5.61836	5.50861	5.48093	5.46349	6.37834	4.89651	5.15258	6.03059	4.44588	4.34308	5.05911	4.85832	3.51554	4.2109	4.83643	4.53354	4.72356	4.35533	4.75672
MELK	3.2291	2.62072e-06	0.000171664	8.93916	5.71006	8.57029	9.25166	9.14124	9.52392	9.55996	9.55719	7.81184	9.88228	9.3301	6.76316	5.18924	7.54162	6.03688	8.01846	5.00835	5.00091	2.93545	5.49463	6.03549	5.8396
MEN1	1.01243	0.000238891	0.00470381	6.43126	5.41883	6.99446	7.29559	6.13893	5.23707	6.43654	6.28028	7.64508	5.93956	5.97845	6.36665	5.57782	5.44163	5.58344	5.03969	5.14471	5.58575	5.67185	5.13355	5.70809	5.30177
MEOX1	3.59134	1.24982e-05	0.00053724	6.53591	2.94457	6.23648	10.6666	6.40106	7.41966	8.03288	5.29956	6.28974	3.2112	7.41564	4.38632	3.43421	3.14744	3.08644	2.12399	2.34262	3.16255	3.00556	2.60124	2.4573	4.08433
MEST	2.89817	7.42888e-08	1.7181e-05	8.64517	5.74699	8.57268	8.39011	8.68226	9.90359	8.60163	8.36873	9.29847	8.01156	7.73013	8.89251	6.42831	6.52514	6.54889	4.2235	4.98726	4.80332	7.04092	4.6686	5.42926	6.81474
METTL13	0.7068	0.00406769	0.0347688	5.76155	5.05475	5.3478	6.27524	6.36761	5.84969	6.31519	5.64893	5.03675	5.62558	5.68524	5.46349	4.42468	5.50061	5.61364	3.98937	4.60245	5.32023	5.70614	5.14062	4.92519	5.32458
METTL2A	0.633184	0.0165364	0.0920781	3.48741	2.85423	3.67158	3.78391	3.7594	4.20191	3.74164	2.04179	3.28927	3.32577	3.78862	3.27025	2.39475	2.93517	2.40855	2.04279	3.47778	2.77251	3.56149	3.34062	2.31294	3.29568
METTL5	0.595787	0.0147668	0.0853193	5.51448	4.91869	5.03019	6.07906	5.76113	5.44186	6.10179	5.45118	5.20436	5.29301	5.68922	5.09295	4.80724	5.50737	5.42874	3.37488	4.44443	5.21628	5.29562	5.04591	4.92954	5.13689
METTL8	0.722664	0.0150563	0.086377	4.41654	3.69387	4.13267	5.11463	4.11129	3.39478	5.51091	3.71202	3.81377	5.1254	4.25012	4.9998	4.00285	3.39817	3.32763	3.95379	4.17326	2.99756	4.01313	2.85903	3.60988	4.60346
MFAP2	2.78577	3.63645e-06	0.000213578	6.99505	4.20928	9.58098	5.53365	6.46188	7.63632	4.79623	6.60577	8.81566	7.65921	6.08628	6.77449	4.24093	4.72596	4.36732	3.54907	3.74732	3.78801	4.40667	4.26482	4.5348	4.46792
MFGE8	0.780421	0.00283904	0.0270518	4.99591	4.21549	4.91495	5.28383	4.77241	4.87858	5.9839	4.38807	5.32684	4.34527	4.40385	5.66144	4.3508	4.08232	4.41714	5.47054	4.12768	4.08462	3.69725	3.62378	4.02592	4.27488
MFN1	0.925025	0.00163263	0.0182671	6.26018	5.33515	7.07686	6.09247	6.36199	5.51049	6.30233	6.55282	5.35852	6.70447	7.20647	5.43534	5.15258	5.69341	5.73737	4.34648	5.4311	5.42336	4.75524	6.1848	5.54758	5.0796
MFSD9	0.77535	0.00397506	0.0342044	4.91894	4.14359	4.92761	5.20964	5.18215	4.56392	4.5537	4.96367	4.11248	6.28781	5.3418	4.04662	3.96431	5.00605	4.25793	3.51625	4.66354	4.02408	3.6805	4.0218	4.07169	4.22976
MGAT4B	1.17483	0.00102679	0.0132507	5.30334	4.12851	6.56424	6.96634	5.05218	4.65391	5.71435	5.43751	4.76742	4.60956	5.19795	4.06996	3.87194	4.52589	4.50166	2.85913	4.23313	4.12391	4.22432	4.10958	4.3167	4.5188
MIR1292	0.641766	0.0149743	0.0861399	8.11207	7.4703	7.76593	8.57698	7.86112	7.88683	8.68707	7.70469	8.6606	8.27675	7.63556	8.06514	7.62943	7.04788	6.93102	9.27421	7.56734	7.09045	7.44387	7.19271	6.99519	7.53091
MIR3658	1.38313	6.71245e-05	0.00185489	5.38696	4.00383	6.03466	5.85937	5.88044	5.58535	5.3177	5.25273	4.25614	5.72305	5.02553	4.9346	4.01422	3.29978	4.2175	5.43711	3.461	2.82026	4.65907	3.60858	4.13412	4.38662
MIR3917	0.946264	0.000185833	0.00391372	5.00366	4.0574	5.37242	4.87765	5.04406	5.00571	5.13734	4.57939	4.78773	5.28955	4.98641	4.95637	3.36944	4.08496	3.98937	5.74405	3.73465	3.8277	4.01803	3.62725	4.13141	4.04713
MIR4691	1.01162	0.00018213	0.00385396	6.28146	5.26984	7.22192	7.43295	5.82058	6.00026	6.83921	5.58173	6.42048	5.51579	5.72459	6.25706	5.23393	5.25877	5.266	5.11861	5.07438	5.09862	5.49797	5.26371	5.01705	5.86934
MIR6778	0.957608	0.000325079	0.00590317	4.88149	3.92388	5.21097	4.94601	5.05071	5.07061	4.84804	4.37749	5.40941	3.88389	5.17085	4.84687	3.88955	3.77768	4.42389	2.67208	4.59014	3.26214	4.02779	4.25534	4.03968	4.30049
MIR6787	0.710163	0.000102978	0.00252424	5.04964	4.33948	5.37791	5.05684	5.02128	5.42555	4.97357	5.5851	4.93621	4.85299	5.1167	4.15027	4.27869	4.0757	4.48345	4.70022	4.26869	4.43559	3.87379	4.32404	4.52993	4.42468
MIR6824	0.855549	0.00413374	0.0352527	4.4274	3.57185	5.07195	5.80573	4.64518	3.5908	4.52702	3.93556	3.96671	4.05652	4.65242	4.02209	4.02294	3.37559	2.68698	4.61999	3.9414	3.74431	2.94146	3.48508	3.02374	3.877
MIR6834	0.58656	0.00322839	0.0296912	5.06685	4.48029	5.70486	5.55695	5.1031	4.62055	5.12598	4.69315	5.66616	5.06102	4.19166	4.94506	4.23694	4.35026	4.41901	5.08096	4.41586	4.62868	4.08462	4.76679	4.40451	4.41528
MIS18A	1.57916	6.75742e-06	0.000340075	7.18344	5.60428	7.92754	7.71082	6.5826	6.68439	7.03174	6.10269	6.7003	7.46119	8.49798	7.13517	6.05348	6.31879	5.93599	4.75946	5.52189	4.84443	5.85358	5.35317	5.64597	5.75605
MIS18BP1	0.952106	0.0125817	0.0764179	5.10331	4.1512	4.89955	3.95893	4.50506	4.51718	5.89384	4.83205	5.49463	6.44953	4.19546	6.28683	4.19546	4.1206	3.74193	2.68404	4.89287	3.32974	4.00941	5.13107	5.02608	4.38082
MKI67	1.16034	0.000276698	0.00523286	5.49908	4.33874	4.50705	6.3799	5.35014	5.6553	6.13943	5.54435	5.10586	5.2073	6.68377	4.4177	4.31136	4.54942	4.10637	5.41229	3.9776	3.80377	4.12367	4.07132	4.28928	4.74228
MKKS	1.27914	0.00360129	0.0318849	8.18033	6.90119	6.86784	7.25757	8.30235	8.65913	8.17763	8.14602	8.70293	8.00268	9.00012	8.68707	6.05775	7.72366	7.5476	3.97127	7.39645	7.45983	7.24398	7.40739	7.20367	7.00031
MKRN1	0.820414	0.0334678	0.148195	7.74853	6.92812	7.85131	8.88342	8.17482	7.98124	7.79542	8.00359	7.06517	7.16276	7.34567	7.22192	6.80086	7.68522	7.27992	4.03749	6.96864	7.53994	7.42691	7.27499	7.5808	6.68639
MLF2	1.26577	2.84716e-06	0.000180957	7.42629	6.16052	7.91517	8.02672	6.91016	7.54839	7.14339	6.65467	7.56897	7.93572	6.84378	7.71594	6.08217	6.53134	6.55282	6.09441	6.14752	5.94947	6.29536	5.19147	6.15454	6.60607
MLLT11	0.999457	0.00114118	0.0142569	5.80603	4.80657	5.35784	4.9405	5.69843	6.60854	4.63645	6.71717	6.33657	5.7641	6.17283	5.82785	4.8607	4.32761	4.41181	5.68223	4.67815	4.49289	5.19555	4.51369	4.18582	5.71725
MLST8	0.742378	0.00516134	0.0416325	5.122	4.37962	6.09173	6.42766	4.9998	4.92357	5.40289	4.47091	5.14899	4.80564	4.66024	4.28858	4.67313	4.39007	4.21365	3.48958	4.13093	4.73074	4.70204	4.64802	4.32404	4.49403
MMP10	1.2201	0.00528295	0.0420838	3.76226	2.54217	2.70156	5.76679	2.31984	3.60125	4.68648	4.929	5.25842	2.73691	3.04029	2.58209	2.73931	2.53084	2.90394	1.95761	2.36556	2.61783	3.09873	2.44401	2.50881	2.25502
MMP15	1.24993	1.36326e-06	0.000107825	5.74913	4.4992	6.18833	6.80406	5.52527	5.84537	5.89492	5.52795	6.04302	5.18699	4.73271	5.74272	4.0218	4.43936	4.70899	4.43698	4.45008	4.56334	4.57089	4.39407	4.65795	4.74858
MMS19	0.93696	0.00252487	0.0249124	6.09024	5.15328	7.2313	6.48512	5.78972	6.4121	5.66342	5.55983	6.25706	6.01063	5.17442	6.31879	5.55601	5.36338	4.95387	3.53658	5.876	5.47977	5.58125	4.9823	4.5387	5.66493
MND1	0.664405	0.0429564	0.175655	2.86614	2.20174	4.21336	4.86474	1.79196	2.15721	3.24733	2.67553	2.82026	2.15059	2.58358	2.15687	1.97589	2.45607	1.93152	2.08386	2.79982	2.0915	2.03136	1.92729	2.21436	2.5057
MNT	0.753679	0.0313822	0.142034	8.31276	7.55908	8.39891	7.52192	8.71221	8.62095	8.60246	8.07266	8.47512	8.54846	7.4587	8.71619	8.2511	7.67797	7.49222	5.03969	7.5742	7.76013	7.10156	7.93832	8.65154	8.10406
MOCS1	0.628055	0.00108101	0.0137313	3.97087	3.34282	4.96264	3.67792	4.03726	3.53382	3.83751	3.51085	3.89261	3.63633	4.55214	4.06767	3.73438	3.1797	3.51488	3.6077	3.04976	3.29344	3.0479	3.28652	3.51218	3.20172
MORC2	0.674886	0.00283956	0.0270518	7.36114	6.68626	7.65921	6.95157	6.95863	7.82223	8.03619	7.49868	7.64263	7.2206	6.24277	7.57888	7.21444	6.0697	6.85064	6.44349	6.97643	6.43801	6.30233	6.86657	7.10627	6.59468
MOSPD3	0.612103	0.000849907	0.0115838	5.77775	5.16565	5.60962	5.17672	5.89152	5.54035	6.01343	5.88813	5.87079	5.40542	5.6625	6.71903	5.17988	5.08848	4.72494	5.70229	5.24168	5.07397	4.98109	5.30135	5.34625	5.01656
MOV10	1.1413	0.0217688	0.111289	5.64902	4.50772	7.47378	6.76614	5.30784	5.30177	7.78484	4.09148	5.88689	4.99597	4.59709	4.28437	4.49015	4.37807	4.73949	2.2632	4.73176	4.97103	5.0996	4.7908	4.32473	5.2884
MPHOSPH10	0.713731	0.0458629	0.183205	8.33117	7.61743	7.93155	7.49868	8.31429	8.20445	8.14347	8.72977	8.90032	8.54226	7.95258	9.09429	7.6249	7.71892	7.82415	4.81012	8.22317	7.84537	7.74696	7.90884	8.31605	8.15587
MPV17	0.803237	0.00539986	0.0425957	5.68674	4.88351	6.70395	5.8941	5.31706	5.61762	4.93757	5.20049	5.73305	5.55895	6.26566	5.639	4.35583	5.2686	5.09786	3.43088	4.32239	4.71311	5.55983	5.06357	5.57953	5.44347
MRE11A	0.610017	0.00477382	0.0391859	4.63259	4.02257	5.35932	4.8883	4.68602	4.21058	4.41021	5.29409	3.98496	4.41797	4.43883	4.63562	4.34792	4.19439	4.26907	2.92045	3.78645	3.93024	4.26774	4.34181	3.87597	4.29169
MRGBP	1.47983	5.56353e-06	0.000289499	5.59819	4.11836	5.9469	6.23336	5.57584	5.43406	5.95801	5.30677	6.56424	4.6692	5.28472	5.00875	4.30833	4.10127	4.34675	2.56469	4.14891	4.24869	4.47213	4.36674	4.50656	4.11947
MROH2A	0.719362	0.0147744	0.0853193	2.94342	2.22406	4.47873	2.39223	2.53418	2.0506	2.06875	3.27874	2.73468	4.15027	2.16622	3.57979	2.24139	2.44969	2.03312	2.08506	2.41366	2.18353	2.21745	2.43339	2.02355	2.15972
MRPL11	0.749904	0.00372574	0.0326378	6.6961	5.9462	7.12187	8.44562	6.75654	6.22053	6.78547	6.29838	6.26446	6.25016	6.94236	5.87563	6.14594	6.24794	5.79624	6.19362	5.95209	5.71641	5.86341	5.70614	5.82997	6.01022
MRPL12	1.37247	5.59787e-06	0.000290436	6.59927	5.2268	7.25463	7.8252	6.2648	6.92891	6.80355	6.89915	5.98171	6.4657	5.87951	5.68954	5.01641	5.71148	5.37853	5.1505	4.64518	5.02941	5.01589	5.2567	5.68886	5.37506
MRPL15	1.26917	0.000284084	0.00534414	7.90389	6.63472	7.49947	8.66608	7.74696	8.68537	8.8516	7.97637	7.6738	6.34509	8.03998	7.55418	6.13823	6.94001	7.34496	5.67094	6.12139	6.78734	7.38391	6.5061	6.05066	7.40365
MRPL17	0.96229	0.00087212	0.0118204	6.92788	5.96559	7.83769	7.03662	6.02532	6.78179	7.30044	7.04153	6.53234	6.69352	6.81867	7.2109	5.6014	6.38634	6.41805	4.31248	6.54352	6.40106	6.17454	6.14913	5.79297	5.87644
MRPL2	0.592172	0.0210368	0.108798	5.14988	4.55771	5.54109	5.99273	5.30712	4.44714	5.2073	4.07021	5.41424	4.63326	4.84197	6.04374	4.75058	4.2643	4.22913	5.46225	4.52073	4.1978	4.80605	4.46792	4.89537	3.98295
MRPL3	0.695928	0.00250232	0.0247671	10.6272	9.93125	10.1481	10.4113	10.697	11.1458	10.3861	11.133	9.85811	10.6168	11.3377	10.5378	9.8169	10.9257	10.297	9.48548	9.77934	9.63894	10.1868	9.29639	9.89769	9.98826
MRPL30	0.735194	2.65559e-05	0.000937675	4.26533	3.53014	4.19929	4.33954	4.70269	3.93653	3.69748	3.98268	4.40906	4.23509	4.86206	4.28889	3.60114	3.48317	3.51905	3.33009	3.52775	3.17226	3.63469	3.32483	3.71375	3.99464
MRPL34	1.51129	4.85189e-05	0.00146844	5.67087	4.15958	6.39202	6.9137	5.38327	4.87586	5.21389	5.661	4.88076	7.06314	5.18093	5.14414	4.31459	5.14828	4.80298	3.5701	4.21576	4.21024	3.71171	3.87792	3.37778	4.36647
MRPL35	0.901514	0.00435584	0.0365472	6.20677	5.30526	5.93003	6.15888	5.86093	6.38599	7.20578	5.92891	5.11892	7.04153	6.38272	6.05405	5.56929	5.58881	5.39752	3.33517	5.87674	5.80431	5.35728	5.39321	5.25877	5.4715
MRPL37	0.70044	0.0295049	0.136378	6.26518	5.56474	6.23132	7.74014	6.79695	6.04122	5.94947	6.78676	5.65562	5.59112	6.97242	4.88675	5.75294	6.0359	6.05986	4.83047	4.4146	5.75294	5.93599	5.96736	5.18343	5.71389
MRPL42	0.60775	0.0496486	0.193336	4.50645	3.8987	4.56417	5.05962	4.18582	5.15336	3.68086	4.76194	4.21219	3.76686	5.55356	4.12613	3.26653	5.15997	4.73634	3.23062	3.50895	4.33194	4.58022	3.72658	2.96113	3.48474
MRPL51	0.668181	0.00984884	0.0645613	8.5022	7.83402	8.24058	8.48548	8.51499	9.12238	8.41884	7.41512	7.99573	9.47383	9.38219	7.97284	7.58628	8.52093	8.19379	7.2268	8.13431	7.86756	7.97514	7.94582	7.34116	7.54839
MRPL9	1.08445	4.05779e-07	4.78228e-05	8.04851	6.96406	8.42547	8.47404	8.15658	8.47404	7.80244	7.47523	7.91517	7.68883	8.16592	7.90734	7.16353	7.00941	6.88652	6.15327	7.13176	7.12498	7.05091	6.92141	6.94188	7.25689
MRPS15	1.35561	2.57454e-07	3.4949e-05	5.91982	4.56421	5.95872	5.37791	5.98743	5.69232	6.74629	5.61056	6.02215	6.65069	5.639	5.51312	4.48495	4.73176	4.58664	4.06601	4.5202	4.49431	3.96496	4.72494	5.10501	4.96329
MRPS17	1.20447	0.000534216	0.00836122	7.25732	6.05286	6.84738	8.01297	7.21223	7.40502	8.04486	7.46094	7.29653	6.12986	7.16403	6.99944	5.82403	6.2601	6.81176	4.00414	5.6268	6.51563	6.66979	6.38746	6.41863	6.01022
MRPS21	0.865366	1.48865e-05	0.000614665	9.56286	8.6975	9.72339	9.30959	9.69326	9.03489	9.6219	9.76329	9.67273	9.60661	8.90032	10.3026	8.87744	8.50658	8.49798	8.41544	9.31262	8.69408	8.91916	8.57029	8.54918	8.63219
MRPS25	0.691095	0.0162474	0.0908953	6.65586	5.96477	5.94187	6.94939	7.5077	6.84413	6.28091	6.29936	5.80917	6.91817	7.0913	6.91659	6.93451	6.34256	5.96961	4.6063	5.65141	5.60631	5.64038	5.83646	6.92214	6.13797
MRS2	0.873103	0.0300618	0.138024	6.49322	5.62012	6.23439	7.23418	6.75037	5.97801	7.35837	5.9892	5.80263	6.00159	7.03174	6.55173	5.04821	6.56625	6.04354	2.6891	6.20337	5.82503	6.43248	5.78517	6.10856	5.49946
MSANTD3-TMEFF1	1.29242	0.000210497	0.00429923	3.82812	2.5357	5.24978	4.06115	2.6996	4.62832	3.50604	4.33869	3.80663	3.57738	3.67707	2.73653	2.11822	3.02766	3.06466	1.78605	2.67764	2.49612	3.56316	2.26028	2.15542	2.20776
MSH2	0.692382	0.0476305	0.188112	5.69034	4.99796	6.20713	5.98171	6.24447	5.56453	4.24233	5.56641	4.85553	6.66195	6.86151	4.71786	4.19514	5.59783	5.33943	3.99484	4.65242	5.68812	6.07348	5.0796	4.50778	4.85098
MSH5	0.8028	0.030674	0.140147	5.91564	5.11284	7.14677	6.00252	5.0921	4.66003	6.81282	6.22432	7.09903	6.26332	4.60021	5.25529	5.82806	4.26869	4.96704	4.05424	5.39857	5.45737	4.56062	5.98596	5.44396	5.16391
MSLN	0.956682	0.0174495	0.0955478	6.98579	6.02911	7.19393	8.10661	7.36404	6.40394	7.11449	6.29261	6.93737	6.09128	5.84889	8.50472	5.98142	5.58216	7.05199	4.49125	6.09942	5.15851	6.73526	5.63287	6.04122	7.51698
MT1F	1.14412	0.00535025	0.0423953	7.96608	6.82196	7.43295	7.66471	8.70566	7.03979	10.3691	8.15007	7.50827	8.95984	6.24343	7.58693	6.4113	6.84035	6.71121	7.76162	6.60389	6.96147	6.86972	6.85297	6.05092	7.15616
MT1H	0.96667	0.0412061	0.170622	7.56533	6.59866	7.01513	7.1138	8.1513	6.99201	10.2069	8.07536	6.68355	8.66885	5.95262	6.79387	6.59714	6.41863	5.82612	8.64295	6.6658	6.39671	6.59512	6.12443	5.52548	7.19425
MT1HL1	0.904503	0.0317766	0.143127	7.42727	6.52277	6.96515	7.20421	8.23431	6.85876	9.49688	7.97284	6.79566	8.07408	5.59401	7.07686	6.16441	5.9183	5.67392	8.25211	6.81626	6.54043	6.64727	6.31519	5.66397	7.23586
MT1X	0.892173	0.0386065	0.163854	7.4043	6.51213	7.19986	7.09903	7.87853	7.28208	9.68964	7.66471	6.47298	8.20068	5.80155	6.75399	6.53453	5.58915	5.73178	8.45928	6.63177	6.29838	6.57645	6.01988	5.97308	7.30703
MTA3	0.791532	0.000532923	0.00835406	5.41903	4.6275	5.89152	4.82443	5.88283	5.61094	4.41222	5.42706	4.99247	5.88767	5.71218	5.54902	4.97631	4.76679	5.13559	3.81484	4.68272	4.52993	4.68308	4.56112	4.36369	4.76095
MTERF1	1.11667	0.00149748	0.0172352	5.26831	4.15164	4.45679	5.94874	6.05126	5.02473	5.84969	5.38286	4.88416	4.9672	5.35418	4.76348	3.85846	4.91704	4.29045	1.93677	4.94427	4.5387	3.90216	4.65358	4.26585	4.20913
MTF2	1.0226	0.00199396	0.0210992	6.99683	5.97423	7.07346	6.66104	7.46778	7.13585	6.8604	7.52192	7.0213	7.57658	6.2601	6.38991	5.97166	6.14552	5.88232	3.73547	6.18833	5.84537	6.32459	6.58805	6.85918	6.20183
MTG1	0.893098	0.000869034	0.0117966	6.55018	5.65708	7.0213	6.6063	5.87815	6.74073	6.65415	5.73454	6.66332	6.5826	6.93332	6.68741	5.2927	5.91459	6.14964	4.06996	6.13038	6.0488	5.80155	5.38019	5.95801	5.82503
MTHFD1	1.19555	0.00135298	0.016041	7.39672	6.20117	7.75764	7.371	7.40186	7.24039	7.729	7.66665	7.06314	6.93332	7.20225	7.60196	6.55099	7.02204	6.35499	3.4785	5.94021	6.04122	6.72814	6.03688	6.72583	7.13287
MTHFD2	0.867354	0.0286335	0.133796	9.155	8.28764	9.24732	9.96042	8.35591	9.8389	8.86009	9.21235	7.54471	10.1624	9.52392	8.84398	8.33755	8.05768	8.13029	10.4504	7.53892	7.28306	8.305	7.17058	8.76332	8.83964
MTMR4	0.59826	0.0440788	0.178308	8.07108	7.47282	8.0665	7.98234	7.92482	8.46554	7.81559	7.04588	8.16592	8.52932	8.5467	8.16815	7.73455	7.8658	7.61495	5.32298	7.95635	7.24531	7.28144	7.69164	8.30009	7.71506
MTPAP	0.673195	0.00639245	0.0478285	6.94737	6.27418	7.06983	6.14642	7.4837	6.65671	7.03396	6.72938	6.81176	7.6344	5.92635	7.98124	6.15327	6.16536	5.9215	6.59186	6.68693	5.57108	6.23931	6.32877	6.55454	6.52918
MUC16	2.42937	0.000362271	0.00637683	9.05797	6.62859	8.35046	10.3691	8.83099	9.31262	9.93945	10.3989	10.1993	7.46119	6.35046	9.3672	6.9559	6.28091	7.90193	3.41059	7.24398	8.59623	6.35046	6.86296	5.72651	6.95643
MUTYH	0.61827	0.0196266	0.103489	6.93902	6.32075	8.24282	6.5239	6.65901	6.38057	7.82871	7.0673	7.02597	6.76261	5.97602	6.92331	6.39671	5.56575	6.03959	7.22239	6.35975	5.92387	6.50024	6.30733	6.20498	6.68693
MX2	1.87877	0.00130778	0.0156511	7.96004	6.08127	9.15551	6.49555	5.66682	6.86723	8.64943	8.79308	9.35336	8.10861	7.29844	9.21235	6.28927	6.73107	5.20404	6.72445	8.60651	4.64693	5.26466	5.45259	5.88855	6.00463
MXRA5	1.63362	0.0149762	0.0861399	9.15367	7.52005	9.66451	5.08546	9.9562	10.7295	9.96606	11.4207	8.67534	8.45425	7.44641	10.1383	8.27553	6.91407	8.53382	6.53999	6.91075	7.09985	6.52851	6.71121	9.19445	8.49231
MYBL1	1.5491	0.00589752	0.0453946	5.82565	4.27655	5.8362	6.56043	6.04393	6.42202	7.35549	6.39822	4.27554	4.75553	7.12498	3.48412	2.67867	5.00252	4.73758	2.23781	5.54799	4.50873	4.27377	3.52193	4.50909	5.74743
MYBL2	1.71123	2.25757e-06	0.000155118	6.43149	4.72026	7.82324	7.0658	5.58055	7.03749	6.5875	6.27359	6.20862	6.17303	6.50853	5.05655	3.98547	4.78652	4.64557	5.2686	4.96593	4.33578	4.76376	4.34675	5.20293	4.90131
MYCL	1.99784	1.94277e-06	0.00013885	5.78033	3.78249	7.1583	5.96025	6.36922	4.47014	5.5883	5.27543	4.45497	7.0849	6.60974	4.83205	3.72315	3.83996	3.80463	3.80536	3.71454	3.68462	3.68187	3.95893	3.91438	3.69748
MYCN	0.85189	0.00157836	0.0178907	4.96939	4.1175	5.68565	4.21576	4.96144	5.61236	4.91466	5.22013	4.97427	5.07915	4.64615	4.3843	3.98529	4.07221	3.85227	5.81586	3.84407	4.11697	3.87576	3.94052	3.95641	3.71561
MYH10	0.827089	0.00377649	0.0328799	8.33984	7.51275	8.78529	7.35139	8.16065	8.6223	8.46554	7.89975	8.72977	8.34771	8.00268	9.03332	7.84294	8.2441	7.7185	5.79624	7.63208	7.8178	7.11655	7.87767	7.38775	7.69388
MYH6	0.91034	0.00260118	0.0253794	3.77613	2.86579	5.16793	3.22274	3.07411	3.17177	3.2199	3.19391	4.21621	5.13734	2.95134	4.40606	2.75963	2.9785	2.72165	2.73177	2.78582	2.97718	2.9087	3.07042	2.88734	2.8369
MYL6B	1.59353	0.00229233	0.0232182	7.51771	5.92418	8.80843	6.50853	7.23948	8.25211	7.07346	7.79847	7.7741	8.17145	6.46676	7.08432	6.47071	6.26842	6.17183	2.15367	6.53835	5.95378	6.0907	6.48925	6.55412	6.55099
MYL9	1.04284	0.0030089	0.0281526	6.27564	5.23279	7.47642	5.16543	5.11892	6.4258	7.14613	6.8635	6.36858	5.69802	5.83646	6.6571	5.70404	5.25717	6.10477	5.36171	4.75933	4.52469	4.46587	4.83668	4.94104	6.37263
MYO10	1.94872	6.12378e-07	6.10792e-05	6.94947	5.00074	6.06806	7.07845	6.7886	6.12239	7.64977	6.04211	8.24058	6.24794	7.87767	7.37908	5.74249	5.02362	4.86	4.50361	5.63723	4.49312	5.06608	4.77338	4.8673	5.04061
MYO19	0.592657	0.00103694	0.0133206	4.27645	3.6838	4.05752	4.10756	3.92377	4.43095	4.28037	4.95048	4.42306	4.56417	3.66608	4.36056	4.00118	3.97127	3.66322	3.97914	3.47522	3.20702	3.13331	4.00201	3.80101	3.60457
MYO1B	0.871747	1.1621e-05	0.000509377	4.35014	3.4784	4.83668	4.34274	4.35467	4.78447	4.66886	3.92598	4.59975	4.04114	4.36056	3.58658	3.19676	3.46258	3.53355	3.81543	3.18243	3.41855	3.35065	3.48786	3.34678	3.98937
NAA10	1.01589	0.000169127	0.00366155	7.14959	6.13371	7.42373	8.46049	7.05683	7.02823	6.80836	7.43624	6.9082	7.03463	6.17454	7.16465	5.85168	5.92055	6.08327	7.02887	6.27107	5.8582	5.57207	5.94228	6.08953	6.71954
NABP2	0.601947	4.0117e-05	0.00127714	3.45489	2.85294	3.45153	3.71851	3.24877	3.38923	2.96262	3.6816	3.73155	3.60265	3.43421	3.32824	2.59446	3.18512	2.80921	2.47072	3.00509	3.05507	2.67381	3.09928	2.78473	2.85192
NACA	0.755925	0.00150861	0.0172985	9.38654	8.63061	9.94755	9.16374	9.75848	9.3301	8.57904	9.15097	9.26242	10.4113	8.95221	9.30959	9.30959	8.80172	8.56031	7.90884	8.78976	8.41027	8.55478	8.17482	8.61774	9.17829
NAGK	0.723692	0.00449895	0.0374302	7.03561	6.31192	7.80388	6.47071	6.51921	7.03174	6.65069	7.45927	7.11958	7.03979	7.5435	6.71778	6.8844	6.60654	6.55019	6.32921	6.24112	6.33886	4.74179	6.50327	6.23846	6.68538
NARS2	1.19749	0.000330759	0.00595768	6.47723	5.27975	6.44036	7.36943	7.172	5.94947	6.08931	6.69064	5.92595	6.62518	6.47738	6.03262	5.17915	5.9095	5.76861	3.30913	6.00987	5.42139	5.39718	5.66342	5.32458	4.81464
NASP	0.67359	0.0423337	0.173988	7.71129	7.0377	9.55247	8.0665	7.7741	7.33644	7.97918	7.28144	7.91842	7.97284	7.11059	6.12093	7.5512	7.30044	6.88039	6.12643	7.16532	6.73661	6.40443	7.74155	7.75231	6.71834
NAT10	0.681025	0.00837818	0.0583326	7.44093	6.7599	7.28144	7.56734	6.98178	6.71466	6.67973	8.01991	8.80172	7.55546	6.85465	7.95258	7.12114	6.45258	6.63681	7.55904	6.44613	6.57645	6.64687	6.57849	6.58326	6.99825
NCAPD2	1.46864	0.00513949	0.0415172	6.00018	4.53155	6.15993	6.33385	5.58575	7.70138	5.0488	3.50183	5.42426	7.2268	6.20389	6.81535	4.30215	5.41709	4.1454	6.04164	3.49188	5.30712	2.87962	4.27488	3.74759	5.70809
NCAPD3	1.21685	0.00304939	0.0284269	6.03691	4.82006	7.20787	5.88767	5.4974	6.16306	5.36185	7.39777	5.8465	5.41137	5.69802	5.89759	5.23669	5.33502	5.32298	2.43028	4.44804	5.08283	6.04837	4.35	4.52299	5.42336
NCAPG	2.47163	1.74845e-07	2.72943e-05	5.49895	3.02732	5.38873	6.40699	5.2861	6.47882	6.02215	5.73888	5.01402	4.76274	6.59008	3.301	2.76963	3.88446	2.6595	2.51163	3.18186	2.95446	3.25337	2.91488	2.73911	3.4043
NCAPG2	0.751687	0.00534404	0.0423953	4.44489	3.6932	4.58904	6.04211	4.01342	3.99786	4.71858	4.52138	4.39846	4.27613	4.65374	3.23817	3.5407	3.88712	3.2324	4.1851	3.87576	3.79784	3.21325	3.65806	4.1768	3.36497
NCAPH	1.53389	3.43047e-06	0.000205208	5.2001	3.66621	6.02827	6.24501	5.0102	5.27209	4.87206	5.27373	4.98593	4.3853	5.86794	4.06049	3.47877	4.45833	3.51777	3.82093	2.98788	3.48958	3.68294	3.75571	4.10363	3.36651
NCBP2	1.43471	1.28137e-05	0.000546811	7.27426	5.83955	8.3737	6.92385	7.03316	6.75976	7.72251	6.46776	6.95383	7.26404	8.34641	6.89759	6.39867	6.33385	6.09987	4.55189	6.03262	5.62894	5.75423	5.8113	5.89343	5.89066
NDC1	1.61729	8.73406e-08	1.85631e-05	4.17147	2.55418	4.49599	4.41649	4.60857	3.73388	3.39677	5.20888	3.47091	3.77666	4.50752	4.09904	2.59762	2.79982	2.66758	1.81906	2.73241	2.74676	2.32368	2.89189	2.37849	2.58446
NDC80	2.92089	5.18477e-07	5.42765e-05	7.74783	4.82694	7.76162	8.05054	9.13034	8.16437	7.81656	8.21006	7.30668	7.61495	8.04659	5.37659	5.11104	5.86482	4.1333	3.34893	6.20834	5.1896	3.19891	4.88741	5.34356	4.98347
NDRG1	1.48023	0.00188346	0.0202382	9.96301	8.48279	9.3646	12.0506	9.95298	9.6335	9.93105	10.5464	9.47383	8.18288	11.9475	8.5467	9.27421	7.88591	8.70856	9.20882	8.59231	8.24841	7.41648	8.00088	8.63219	8.86009
NDRG3	0.798818	0.00171489	0.0189318	6.72164	5.92282	6.46139	5.72459	6.40394	7.03233	6.55173	6.04122	7.58628	6.85136	7.22192	7.34161	6.28463	5.78315	6.15915	4.87628	6.41564	5.80573	6.12589	5.90488	5.91332	5.95952
NDUFA1	0.838494	0.00251085	0.0248239	9.81378	8.97529	9.15097	9.29065	10.0113	9.55719	10.8699	10.2471	9.68652	9.58482	9.48548	10.2538	9.19888	9.54597	9.16913	7.48446	9.54597	9.04894	8.42819	9.13301	9.17186	9.02645
NDUFA12	1.23937	0.0272282	0.129121	9.52767	8.2883	9.67717	9.71241	9.58098	9.06939	8.7501	10.1545	10.0221	8.9212	9.64576	9.74307	8.90802	9.02312	9.07401	3.51754	8.89251	8.93024	8.23654	8.86009	8.33755	9.10335
NDUFA13	0.992505	0.0162118	0.0908107	8.19161	7.19911	7.34724	9.29847	8.39111	8.05768	8.23553	7.9689	8.32082	7.40365	8.35046	8.54226	7.75471	7.79406	7.77917	4.07528	7.96299	7.28562	6.85703	7.40028	7.37952	7.70239
NDUFA3	0.816894	0.0195709	0.103377	8.26519	7.4483	7.69832	7.78085	8.85434	8.68385	8.46889	8.70728	8.40079	7.51104	7.39556	9.15097	7.54677	7.64177	7.5512	5.0086	7.64729	8.24581	7.53427	7.93467	7.66888	7.70371
NDUFA9	0.908335	0.00590199	0.0454093	8.53627	7.62793	7.71182	8.13804	8.54846	8.69944	8.38641	7.90734	9.11188	9.24012	8.78151	8.83767	7.62558	8.16815	7.97985	5.34463	7.55708	7.9445	8.06077	7.95123	7.37761	8.26992
NDUFAF5	0.638864	0.000210661	0.00429923	3.96719	3.32833	4.15979	4.05218	3.55324	3.95681	4.33996	4.02016	4.03446	3.87463	3.74993	3.93075	3.29544	3.68688	3.37678	2.39647	3.44464	3.68347	3.05643	3.57225	3.26855	3.50236
NDUFB4	0.587533	0.0197435	0.10389	6.94969	6.36216	5.89492	6.60522	6.88999	7.41164	7.61968	7.20647	7.17143	5.99044	7.55418	7.15296	6.21587	6.86657	6.84243	5.33352	6.56043	6.55823	6.44723	6.0552	6.08157	6.66053
NDUFB7	0.707669	0.00108437	0.0137531	4.35284	3.64517	4.20686	4.98187	4.50233	4.61204	4.56664	3.92846	4.58563	3.44017	4.5097	4.19469	3.49388	3.97501	4.0127	2.75057	3.52284	3.65806	4.19977	3.77028	3.26799	3.8006
NDUFB9	1.39641	2.64509e-05	0.000935825	9.94415	8.54773	9.92651	11.2923	9.98826	8.93216	10.9468	9.78905	9.94373	8.93401	10.1793	9.50935	8.68226	8.52567	8.72252	9.47741	8.56694	7.96693	8.21943	8.12926	8.51248	8.67444
NDUFS1	0.892024	0.00169088	0.0187513	7.20153	6.3095	6.30145	7.08914	7.28144	7.29388	8.38048	6.00109	7.26059	6.97643	7.83852	7.59226	5.57687	7.00324	6.59572	6.03688	6.10436	6.5458	6.55173	6.6211	5.76898	6.29034
NDUFS3	0.72668	0.020986	0.108598	7.0998	6.37312	7.70631	7.02204	6.10086	6.4132	8.36261	7.66012	7.24764	6.50024	7.30834	6.67661	6.44912	7.00206	6.84675	4.66689	6.88561	6.63959	6.69352	6.20994	6.1848	6.15289
NDUFS5	1.26831	1.30012e-06	0.000103953	10.2237	8.95542	10.804	9.82642	10.3026	9.25166	10.3486	10.7225	10.858	10.6666	9.68652	9.7704	8.7643	9.07401	8.64419	9.02126	9.29331	9.13034	9.13301	8.71817	8.61571	9.1599
NDUFS6	0.93823	2.29595e-05	0.000842447	11.1178	10.1796	10.3412	10.9814	10.9724	11.5887	11.6229	10.697	11.315	10.9962	11.8596	10.804	10.3026	10.7405	10.4331	9.97602	10.0675	10.1624	9.72339	10.3412	10.0275	10.0221
NDUFV1	0.940053	0.000369245	0.00648077	8.45154	7.51148	7.83343	9.64341	8.23842	7.71082	9.18043	7.7694	8.8516	7.76547	8.61209	8.91026	7.60907	7.61495	7.43813	7.29985	7.53001	7.57977	7.17882	7.3293	7.52649	8.00843
NECAB3	0.712886	0.00537735	0.0424935	6.29499	5.58211	6.67349	6.47828	5.89574	5.81339	5.72702	5.97691	6.57787	6.20337	6.94485	6.65901	5.73841	5.04911	4.96144	7.04092	5.18659	5.24079	5.38507	5.37744	6.0907	5.75063
NEIL3	0.987692	0.000960426	0.0126747	3.86422	2.87653	3.29544	3.4391	3.8654	4.33194	4.13671	5.01336	2.93713	4.10438	4.64147	2.87728	2.99951	3.09096	2.69105	3.88642	2.30269	2.87383	2.93988	2.2471	3.01689	2.717
NELFCD	1.07727	5.46248e-05	0.00160222	7.36922	6.29195	7.85466	8.33293	6.79643	7.07686	7.47166	6.17128	7.90429	7.28902	7.46344	7.33159	6.0331	6.87814	6.63059	6.08395	5.70404	6.34221	6.29536	6.2842	6.5661	6.10179
NES	0.89742	0.00578711	0.0447188	5.42125	4.52383	5.17236	5.11703	4.45238	6.28349	5.791	7.27831	5.70086	5.08283	4.17342	5.16082	3.87354	4.52206	4.49289	5.03969	4.13363	4.63308	4.25685	4.84944	4.44804	4.98907
NETO2	0.726772	6.92113e-05	0.00189199	3.53476	2.80799	3.62627	3.42841	3.4397	3.72684	3.23772	3.10464	3.67792	4.15979	3.97818	2.96815	2.55779	2.98043	3.0181	2.4866	2.56521	2.46755	2.99475	3.03747	2.8839	3.08809
NEU1	0.684822	0.0151817	0.0868019	5.19589	4.51107	5.40542	6.34778	5.19589	4.58664	5.4974	5.03315	5.60319	3.81883	6.14434	4.32629	4.58022	4.21532	4.58563	4.49289	4.17598	4.74752	4.99094	4.71737	3.86085	4.74397
NFYC	0.669698	7.20879e-05	0.00194081	4.9882	4.3185	5.57584	5.19467	4.6153	4.72068	4.93063	4.96961	4.93913	5.46472	4.61645	4.85497	3.95535	4.32659	4.54606	4.37309	4.01703	4.58664	3.98003	4.40072	4.45803	4.54148
NHP2	0.889832	7.28908e-06	0.000357346	9.66229	8.77246	8.76752	9.99341	9.99341	9.48548	9.99341	9.44082	9.87429	9.73039	9.62568	9.71851	8.67079	9.04894	8.97786	8.28249	8.84729	8.54535	8.68909	8.54064	8.91575	9.20643
NIF3L1	1.27247	0.0067489	0.049742	7.85319	6.58072	7.39868	8.10861	8.37026	7.54268	8.23431	8.09694	7.20902	7.94966	8.09978	7.52192	6.3849	7.2873	7.23586	2.76282	7.09356	7.13517	7.12187	7.07213	6.69842	7.01513
NINL	1.96188	2.29588e-05	0.000842447	7.2609	5.29902	9.06939	6.0405	6.78078	5.88855	6.91659	6.83313	8.1593	8.19647	6.57293	8.1513	5.14574	4.52469	4.60458	4.45317	5.46692	5.50061	5.61056	5.63641	6.06313	5.98439
NIPSNAP1	0.613169	0.000294883	0.005487	6.14239	5.52922	5.29365	5.8616	6.27919	6.56871	6.23439	6.46188	6.37883	5.93894	5.86093	6.5458	5.27373	5.61636	5.66884	5.52899	5.61364	5.23214	5.62924	5.42616	5.67135	5.63178
NMD3	0.877696	0.00202114	0.0212731	5.63933	4.76163	5.44061	5.78445	5.59861	6.18889	5.58796	5.06497	5.04741	4.98471	7.35984	5.3358	5.07755	5.2567	5.22511	3.99932	4.52702	4.48781	4.97966	4.4198	5.04089	4.60245
NME1	1.38738	2.76859e-05	0.00097179	8.06854	6.68116	8.42221	9.86227	7.9412	8.46889	7.72449	7.92582	7.45786	7.69954	7.90429	7.27885	7.05872	7.27934	7.05753	7.00747	6.64616	5.87404	6.15888	6.32056	6.58833	6.8206
NME4	0.796036	0.0137838	0.0811972	7.08257	6.28653	5.96736	6.87017	7.25757	6.71717	7.95406	6.77689	6.90318	8.16437	6.12198	8.0929	6.25207	6.18833	5.81155	7.43055	6.05213	5.21885	6.21381	6.12589	6.68301	6.8891
NMU	3.46	8.14123e-08	1.83394e-05	7.23309	3.77309	7.84417	8.60246	9.29639	6.04677	6.45147	7.99214	6.92634	6.07906	8.03764	5.05447	4.07914	4.49716	3.40211	2.51561	4.23364	3.44531	4.25998	3.44908	3.84827	4.00062
NONO	0.792041	0.000103431	0.00252839	8.22169	7.42965	8.93623	7.54916	8.01156	8.26472	7.85922	7.75471	8.52567	8.64295	8.28963	8.38306	7.77591	7.59308	7.40265	6.7122	7.32223	7.32368	7.64508	7.4563	7.70371	7.36164
NOSIP	1.14519	0.014059	0.0824365	7.78896	6.64377	8.38104	8.64419	7.39645	8.09744	8.2511	7.29267	8.04799	7.52192	6.55983	7.697	7.07902	6.73585	7.15163	3.01361	7.48679	6.68215	7.20148	6.78052	7.10979	7.19686
NOTCH3	0.589218	0.00150019	0.0172352	4.89419	4.30497	5.42291	4.93533	4.33397	4.97427	4.55344	4.26992	5.57584	4.82492	4.63209	5.41923	4.30337	4.61709	4.40734	4.02752	3.96431	4.4616	4.37216	4.40992	4.39767	4.08877
NOV	1.17255	0.00046631	0.00763427	5.17948	4.00693	4.60114	5.77528	5.89835	4.80489	5.25743	6.05775	4.78914	3.47256	6.14103	4.99719	3.4881	3.99074	4.22623	3.9414	4.04463	4.04036	5.12263	3.82437	3.61867	3.77214
NOX4	1.13976	0.00950045	0.0633126	3.36388	2.22412	2.51689	4.19686	3.49809	6.68693	2.51028	2.78943	3.42158	2.42428	3.46584	2.12862	2.34086	2.16686	2.42131	2.07151	2.34813	2.13987	1.93954	2.45139	2.06688	2.29488
NPC1	0.688431	0.000949951	0.0125971	4.47988	3.79145	4.90315	5.41631	4.47213	4.17457	4.02985	4.86234	3.98937	4.26959	4.94601	3.73547	3.56786	3.90978	4.09736	3.90803	3.92546	3.78909	3.77126	3.63174	3.39131	3.92259
NPC2	1.23331	0.0060683	0.0462168	9.66295	8.42964	9.87429	8.41884	10.5464	9.93533	9.68652	9.35967	9.50319	9.82642	10.2538	9.22502	8.89645	8.87182	8.98043	5.03969	8.32563	9.02645	8.34641	9.12485	8.63797	9.04674
NPM3	0.973399	6.52489e-05	0.00181433	5.03568	4.06228	4.71431	5.05879	5.23214	5.52264	4.64392	3.87435	4.98641	5.52966	5.07915	5.71545	3.99033	4.26992	3.92598	4.39623	3.7582	3.94753	3.62663	3.84266	4.75874	4.10663
NR2F6	0.614555	1.92151e-06	0.000138226	5.04517	4.43061	5.02941	5.06338	5.3052	5.13775	4.86776	4.93721	5.28816	5.18282	4.71339	4.92658	4.27694	4.29861	4.5894	4.25657	4.65273	4.39455	4.60413	4.32345	4.54889	4.36085
NRAS	1.56091	0.000306363	0.00565564	5.24294	3.68204	5.07472	5.59112	6.07698	6.1869	5.54035	4.34392	4.49847	4.41494	7.04257	3.65945	3.64241	4.28889	4.11342	2.58115	3.57811	3.37623	4.9178	3.43667	3.56656	3.31912
NREP	1.00122	2.93632e-05	0.00101217	6.68249	5.68127	6.42291	6.58377	6.65069	7.49947	6.21381	6.59661	7.11655	6.29088	6.20337	7.24686	5.39718	6.30092	6.0426	6.06668	5.336	5.21921	5.24642	5.3996	5.93727	5.86685
NRTN	1.67003	0.013761	0.0811463	4.68016	3.01013	5.20198	5.8586	5.1983	3.41651	2.81222	3.18202	8.54364	4.70692	2.69752	5.18388	3.80603	5.85168	3.2069	2.19108	2.91329	1.96744	2.42591	2.45643	2.58039	2.70216
NSUN5	1.03819	3.89366e-05	0.0012485	8.35914	7.32095	8.50658	8.68226	8.49399	8.13948	8.49399	8.62325	8.64785	8.09223	7.24101	8.67079	7.70868	6.96364	7.12271	6.39268	8.08872	7.38929	7.02454	7.63994	7.45561	7.42373
NSUN5P1	1.20104	2.32735e-05	0.000847235	8.66937	7.46833	8.91397	8.91575	8.87968	8.40432	8.83099	8.80172	9.04266	8.41328	7.35004	9.14124	7.98814	6.88766	7.33406	6.73225	8.26992	7.35837	6.94613	7.70631	7.68883	7.77157
NTF3	0.755757	0.0411754	0.170568	5.38035	4.62459	7.33002	4.30337	5.17887	4.94565	4.54132	4.929	5.73921	7.18079	4.40385	5.25138	4.25347	4.26907	4.37361	5.67018	4.55926	4.55589	4.94283	4.78899	4.6402	4.19241
NTMT1	0.594261	0.0463043	0.184388	5.76563	5.17137	6.01063	6.93754	5.77856	5.99235	6.60974	5.9543	5.37853	5.33964	5.12876	4.52625	4.65756	5.14314	5.52264	6.65616	4.38195	5.16448	4.96625	4.98148	5.07	5.17006
NUDT1	1.44985	1.32687e-05	0.000558519	5.72097	4.27112	6.30499	6.04122	6.11106	6.45191	5.53365	4.65872	5.49881	5.00482	6.01656	5.58796	3.76207	4.84329	4.62673	2.80649	4.62222	3.9518	4.46021	4.83423	4.29045	4.51369
NUDT15	0.889595	0.0188573	0.100655	7.46997	6.58037	6.63625	7.53262	7.58693	9.26435	7.89333	6.44768	8.19841	6.77939	7.05631	7.30441	6.9957	6.89622	7.35483	4.42903	6.32095	6.56249	6.90135	6.54133	7.12023	6.6816
NUF2	3.84076	1.73691e-12	7.72753e-09	6.75547	2.9147	7.79013	6.63959	6.59008	7.2206	6.85297	7.61324	6.40624	6.57713	6.61106	5.25363	2.39334	3.82185	3.17808	2.6248	2.6891	2.58389	3.18113	2.80128	2.33859	3.53496
NUP107	1.0424	0.0313707	0.142034	10.0311	8.98875	10.7879	8.9435	10.4053	9.64341	8.94796	10.0734	10.1037	11.0117	9.60661	10.7879	9.84896	9.12806	9.09429	5.35828	9.92089	8.86666	9.3394	9.13579	9.93533	9.25983
NUP155	1.75582	9.00934e-05	0.00229699	5.27157	3.51575	5.52863	6.539	5.21706	4.34464	4.57766	3.87866	4.94375	5.68922	7.16465	4.83243	4.22574	4.49458	4.02535	3.1023	2.40272	3.41122	3.58892	3.47778	2.50222	3.92672
NUP210	0.604546	0.000732878	0.0104338	4.82747	4.22292	5.19248	5.53422	4.8135	4.21532	4.73176	4.98471	4.38868	5.24168	4.49562	4.67674	4.42792	4.18486	4.06266	4.44067	4.00356	3.87463	3.96041	4.30661	4.53051	4.43739
NUP85	0.648944	0.00569928	0.0442958	7.27399	6.62505	7.60286	7.17325	6.32771	7.34567	7.65336	7.62834	7.00824	7.86496	6.98874	7.14677	7.14037	5.78627	6.4605	5.92331	7.01135	6.17682	6.72445	7.13938	7.17725	6.71077
NUP93	0.923736	0.00864351	0.0596201	6.76716	5.84342	7.08774	8.04392	6.55454	6.55173	6.83252	6.79387	6.63981	6.55983	5.99087	6.61672	6.4003	6.33473	5.96525	3.2904	6.26267	6.01807	6.0528	5.97691	5.7226	6.41044
NUPL2	0.716415	0.0268982	0.128092	5.61217	4.89575	5.00196	5.78367	5.71923	5.66702	5.33702	6.733	5.79257	5.98862	5.05588	5.04267	4.40798	5.37694	5.53987	2.69925	4.76907	5.40002	5.12671	5.53179	4.99366	5.11222
NUSAP1	3.01038	5.54332e-10	4.69757e-07	6.79121	3.78083	6.01807	6.91993	6.93646	7.37003	7.94898	6.48776	6.97995	7.13585	6.75037	5.3647	2.85151	4.71786	3.56522	3.99553	4.01733	3.79569	3.4916	3.63873	3.11221	4.62264
NXPH4	0.62297	0.00376937	0.0328799	4.39231	3.76934	4.05394	4.1768	3.79113	4.34976	4.6378	5.39796	4.86097	4.74752	4.03726	3.86998	3.85196	4.27521	3.89005	3.80463	3.59788	3.70379	3.32203	3.75257	3.2192	4.27613
NXT1	0.729371	0.00155786	0.0176809	7.42839	6.69902	7.42294	6.8088	6.71668	7.42373	7.72162	7.60196	8.06147	7.48744	6.79643	8.24282	6.48656	6.56424	6.69548	6.51514	6.54693	6.27324	6.86827	6.57907	6.77449	7.68678
OGDHL	1.99074	1.03615e-08	3.91456e-06	6.58094	4.5902	6.96015	7.21736	6.05092	6.16589	6.94116	6.22122	6.88561	6.33343	6.52851	6.50516	4.0486	5.33888	4.67076	5.5387	4.36347	4.05346	3.91591	4.02628	5.0102	4.93575
OIP5	1.14371	0.000348035	0.00618744	4.347	3.20329	3.71757	5.70287	4.66235	4.50705	4.23395	4.23145	3.70018	4.48149	5.00891	3.22414	3.01438	4.20293	3.02147	2.2632	3.37323	2.87109	3.46785	3.74617	3.2192	2.85339
OLFML2A	1.18372	0.00629009	0.0472913	6.16997	4.98624	7.72251	5.56177	5.56575	7.77275	5.45569	7.86264	6.34568	5.12126	5.64232	4.64929	4.95511	5.35217	5.42706	5.96245	4.93221	5.32566	4.24197	4.66055	4.73146	4.27377
OPLAH	2.22594	2.49358e-05	0.000898294	6.14091	3.91497	5.51127	8.76332	5.73612	5.06307	7.43055	7.09618	4.48953	5.37011	6.20624	5.74272	3.6805	3.49641	3.61276	5.2261	4.4464	3.62344	3.64113	3.40263	3.91344	4.10689
OR7E12P	0.686863	0.00805192	0.0565924	6.94869	6.26182	6.88325	5.61636	6.8387	6.60125	8.12978	6.90318	7.192	6.63386	6.76316	7.92532	7.04935	5.89964	6.22734	6.06711	6.42885	6.30787	6.27919	6.09692	6.12093	6.14103
OR7E37P	1.17134	4.77449e-05	0.00145242	8.24559	7.07425	8.38404	7.19477	7.9592	8.0678	9.15275	7.97514	8.77135	8.06077	7.93022	8.95984	7.21736	6.48776	6.88503	8.08992	6.87369	6.79767	7.36338	6.66332	6.85221	7.51214
ORC2	1.12854	0.000147688	0.00330183	5.90229	4.77375	6.15685	6.54889	6.53557	5.52754	6.70986	4.83437	4.57833	6.62942	5.59137	5.91071	4.9346	4.73146	4.62673	4.42935	4.50412	4.52909	4.80332	5.22791	4.86206	5.08885
ORC4	0.680817	0.011373	0.0711152	6.04209	5.36127	5.29166	5.96823	6.58119	5.87215	6.92822	6.40553	5.04061	6.63461	5.78896	5.90975	5.41665	5.69531	5.59747	3.99786	5.90318	5.6926	5.67661	5.35462	5.19503	5.08342
ORC5	0.641089	0.00142835	0.0166638	3.9438	3.30271	3.93627	4.63709	3.51399	4.31481	4.34218	3.9031	3.77146	3.44933	3.9533	3.61646	3.33984	3.63357	3.62961	2.33339	3.2836	3.50479	3.31594	3.25597	3.02841	3.70199
ORC6	1.77331	2.92333e-05	0.00101017	8.83314	7.05983	8.42941	8.3435	8.82181	9.21783	9.1083	9.88683	8.77639	8.98644	7.87658	8.88431	6.94152	6.87925	6.01243	9.40318	7.01775	5.70809	7.09356	7.30112	7.1724	7.06899
OSBPL2	1.22164	1.41298e-05	0.000587508	7.19412	5.97248	8.27675	7.43888	6.68583	6.62883	7.56734	7.05872	7.51738	7.64813	6.64616	6.4732	6.43458	6.05348	6.02356	5.3517	6.0288	5.94407	5.31464	6.47604	6.28091	5.81705
PACSIN3	0.680353	0.00183859	0.0198782	4.47928	3.79893	4.90778	4.68026	4.08232	4.43034	5.04643	4.14576	4.80564	4.18419	4.08397	4.4261	3.85588	3.59448	3.43724	4.78098	3.88859	3.13109	3.20464	4.16694	3.75039	4.17904
PAFAH1B3	1.31535	3.60152e-07	4.482e-05	6.87737	5.56203	7.21365	6.73661	6.97708	6.86657	7.05872	6.28729	7.43439	6.71954	6.24501	7.23486	5.08342	4.88202	5.29709	5.84711	6.09645	5.17415	5.87022	5.60319	5.78272	5.9839
PAIP1	0.844549	0.0159767	0.0897765	7.30524	6.46069	6.59431	7.84294	7.09618	8.21943	6.91746	6.37942	7.18231	7.13938	8.36067	7.32034	6.35137	7.44297	6.96699	4.23509	6.32968	6.63059	7.01854	6.46105	6.66104	6.50962
PAK1IP1	0.760974	0.0277766	0.131071	6.57653	5.81555	6.00617	6.74012	6.88766	5.05332	7.93663	5.43328	7.56059	6.29988	6.31669	7.53091	6.62034	5.62333	5.38909	5.27913	5.76552	5.45751	5.61468	6.14752	5.48984	6.76855
PANK2	0.870912	0.0457432	0.182849	9.09516	8.22425	8.63602	9.18462	8.85664	8.78644	9.33428	8.61209	9.77516	9.55996	8.9756	9.23083	8.22711	8.83356	8.47512	4.56027	8.46049	8.87968	9.03809	8.97786	8.64685	8.14347
PANK4	0.773276	0.000108577	0.00261466	6.08755	5.31428	6.11263	6.64166	6.11106	6.01919	5.79584	6.55347	6.5258	5.58706	6.08395	5.44487	5.65692	5.60033	5.76361	4.95094	5.5394	5.08982	5.19971	5.39831	4.95953	4.9842
PAPD7	0.619064	0.00245735	0.0244855	8.67426	8.05519	7.97514	8.54064	8.56694	8.77341	8.95221	8.64419	8.75363	9.50319	8.76332	8.26992	8.21863	7.83711	7.83476	7.52828	8.03288	8.08872	7.46778	8.23553	8.71375	8.59451
PAQR4	0.972932	0.00856122	0.0592132	5.30069	4.32776	4.66621	5.70212	5.99273	5.0515	5.08342	5.15295	5.33981	6.21938	5.06608	4.73271	3.96354	4.75058	4.64833	6.70447	4.82741	3.09928	3.5845	3.91679	3.94699	3.8357
PAQR6	1.06924	0.00589356	0.0453946	5.8007	4.73147	8.10581	5.00934	4.88321	6.98468	5.57207	6.2888	4.97792	5.21946	4.52176	6.444	5.13107	4.52993	4.62673	4.25132	4.81972	4.64615	4.51718	4.64593	5.13329	5.01336
PARL	0.758861	0.000198056	0.00411273	8.20855	7.44969	8.72798	7.93022	7.94966	8.22802	8.15516	8.0705	8.10321	7.84537	8.91101	8.16437	7.50799	7.77917	7.27623	8.08658	6.78734	7.52307	7.47341	6.81577	7.49076	7.75658
PARP2	0.981109	1.95086e-06	0.00013887	6.51458	5.53347	6.70986	6.77128	6.36816	6.44308	5.97991	6.67349	6.7268	6.41805	6.2127	6.84243	5.76232	5.36617	5.40002	4.83775	5.79624	5.80104	6.06859	5.69917	5.0444	5.55895
PARPBP	1.60463	1.6787e-06	0.000126051	3.97523	2.3706	3.68086	4.3843	4.62868	3.89038	4.4167	4.72434	4.37838	2.71331	4.26641	2.66893	2.03741	2.76578	2.33814	1.79695	2.80756	2.35115	2.41001	2.35646	2.31718	2.52537
PAXIP1	0.956703	0.0225745	0.114032	6.73133	5.77463	6.28974	6.86827	6.86443	6.27001	7.1583	7.64555	6.26625	6.62883	6.54889	6.77304	6.00683	6.02495	5.88391	2.38787	6.26773	5.48425	6.47004	6.32529	6.47543	6.41998
PBK	3.03583	3.72595e-05	0.00120998	5.49112	2.45529	3.59885	5.0052	5.23046	8.02999	7.04657	6.98631	4.13688	3.928	7.84182	3.10713	2.09597	4.27972	2.08136	2.05957	2.31074	1.82859	2.40978	2.04254	2.54684	2.8978
PCBD1	0.650509	0.0168789	0.093227	5.91827	5.26776	5.51049	6.48925	6.20571	6.17559	5.8465	6.28683	5.73368	5.00023	5.87404	6.06041	5.38212	5.89446	5.77766	3.39543	5.39718	5.33715	5.23356	5.4692	5.08007	5.7108
PCBP4	0.724367	0.00065281	0.009641	5.38699	4.66263	5.27699	5.08317	5.56805	5.13107	5.81283	5.12402	5.7709	5.5613	4.53907	6.00252	5.1319	4.35692	4.83567	5.09116	4.46095	4.86873	3.89337	4.43516	4.70327	4.84913
PCCB	0.647855	0.0362393	0.156799	5.04487	4.39702	5.12901	5.19072	4.59125	5.1307	5.96659	4.49663	4.66386	4.42202	5.88504	4.97291	4.33342	4.62977	4.73527	6.38092	3.83493	3.92817	3.59576	3.76032	4.30173	4.46988
PCK2	0.952574	1.9734e-05	0.00075362	6.04959	5.09701	6.65801	6.15615	6.06608	5.70168	6.41514	6.16474	5.48886	6.02058	5.61393	6.21069	4.90315	5.0254	5.20537	4.95419	5.44515	4.79189	4.50592	5.12825	4.95953	6.05126
PCNA	1.88414	8.23972e-05	0.00215322	8.18415	6.30001	7.1397	8.62705	7.72035	8.38355	8.23922	8.42941	8.57534	7.95735	8.82723	7.94235	5.85263	7.55224	7.22385	3.23626	6.44349	7.05254	6.41044	6.52718	5.99409	6.70742
PCNT	1.03919	0.00304714	0.0284208	8.06514	7.02595	8.31343	7.9326	7.15762	6.53166	8.01846	8.90802	8.19254	9.02941	8.35697	8.21066	7.18765	6.98932	7.12471	5.13601	6.76209	7.12984	7.31871	7.70785	7.37003	7.53329
PCOLCE2	1.18762	0.00287452	0.0272102	3.71111	2.52349	6.53453	3.00849	3.00016	4.07528	3.31094	2.83472	2.86588	4.44557	3.90998	3.12551	2.67129	2.34576	2.54469	2.04774	2.20917	2.5363	2.45699	2.42521	2.99243	3.0053
PDCD10	0.867928	0.0413018	0.170932	7.46897	6.60104	6.93536	7.40365	7.36873	8.24841	7.69832	8.27553	6.57432	6.68271	8.56031	6.94236	6.54952	7.32821	7.63143	4.00385	5.99752	7.06879	7.95406	5.97015	6.24112	7.26577
PDCD5	0.607715	0.00824116	0.0576266	4.96996	4.36225	6.73729	4.75946	4.71654	4.64818	4.82183	5.06704	4.70248	4.74752	5.08261	4.4167	4.49458	4.18112	3.93749	4.57183	4.36216	4.43415	4.39658	4.54469	4.313	4.38689
PDHA1	1.25158	0.000437102	0.0073453	8.33265	7.08107	8.20651	7.6738	8.46554	8.02079	8.48243	9.23605	8.21734	8.07536	8.44928	8.49944	7.65921	7.45084	7.31584	4.61782	7.44573	7.13811	6.80644	7.09526	7.78281	7.49868
PDK1	0.593549	0.00384842	0.0333247	4.24562	3.65207	5.19876	4.48742	3.61809	3.81025	4.62024	4.68731	3.91285	3.84472	4.14255	4.134	3.61586	3.10742	4.15076	3.71757	3.58892	3.92953	3.82158	3.2202	3.52523	3.84366
PDSS1	1.46713	1.81196e-05	0.000712819	5.86799	4.40085	5.49844	5.85937	6.13326	5.33767	6.69928	6.32877	4.75787	6.60927	6.15389	5.30205	4.60458	5.31491	4.62673	4.08397	4.43207	3.52213	3.62663	4.71706	3.8868	5.19365
PDYN	0.874264	0.0261369	0.125474	3.95938	3.08512	3.09962	3.60517	3.5894	5.90385	3.75461	6.28827	3.89725	2.75326	3.02485	3.67751	3.09358	3.00976	2.92517	3.65338	2.92493	3.08943	3.54021	2.70243	2.74766	3.16463
PDZD2	0.903948	0.0252465	0.122957	6.34945	5.4455	5.89881	5.31633	5.38286	6.775	6.41628	7.89099	6.5823	6.93102	6.55823	5.74272	5.10541	4.96329	6.69316	3.27458	6.12034	5.14574	5.31735	5.41725	5.78663	6.63128
PEA15	1.30152	8.26398e-08	1.83832e-05	7.36619	6.06467	7.54839	7.06809	7.73144	7.87498	7.02979	7.52017	6.9298	7.15677	7.48982	7.31264	5.92354	6.219	6.54532	5.79717	5.75154	5.64193	6.26842	5.47284	6.63018	6.39671
PEG10	1.05753	0.00143207	0.0166896	5.32142	4.26389	5.43156	5.57687	4.9525	5.42291	6.25608	5.33964	4.70157	6.11263	4.06196	5.35852	4.0789	4.92519	4.28466	2.81903	5.06176	4.06831	5.24826	3.68522	4.13297	4.33462
PEPD	0.880188	0.00126194	0.0152151	6.61339	5.7332	7.99714	5.71545	7.01035	6.61175	5.61794	6.75177	6.95271	6.44912	6.92059	6.10707	5.47945	5.62974	6.00026	6.15656	5.13258	5.66896	6.18584	5.45919	5.63287	5.98656
PEX11B	0.7776	0.00899589	0.0615025	7.00511	6.22751	5.97102	7.00092	7.20148	6.66053	7.5773	7.09689	6.5914	7.10627	7.58918	7.25615	5.67185	7.11917	6.47543	4.43139	6.43091	6.65801	6.08803	6.44555	6.82973	6.12506
PFAS	0.666047	0.0183424	0.098736	6.68778	6.02174	7.26745	6.75976	6.60577	5.91368	6.03059	6.06313	7.18079	7.06919	6.37339	7.61408	6.75177	6.16339	5.9839	4.9776	5.77434	5.40809	5.50575	6.07446	6.67421	6.90385
PFDN2	1.2343	1.70076e-06	0.000126639	7.78866	6.55436	8.45066	8.17648	7.98234	7.68347	7.74782	7.19686	8.35046	7.4828	6.74519	8.0705	6.97844	6.55935	6.56935	5.99878	6.64687	6.39934	6.62444	6.44555	6.93754	6.38391
PFDN4	0.592701	3.40582e-05	0.0011329	5.54744	4.95474	5.06891	5.35655	5.5051	5.84754	5.92836	5.59783	5.58408	5.48305	5.57399	5.52899	4.95674	5.19197	4.97227	5.29811	4.85069	5.02639	5.10894	4.56796	4.80724	4.76707
PFKM	1.25933	1.17111e-06	9.69351e-05	8.12285	6.86352	8.21195	7.62082	8.27762	7.93572	8.10581	7.5039	8.06907	8.86986	8.31087	8.32286	6.74714	6.95765	7.00542	6.03959	7.28562	6.28729	6.65671	6.86784	7.21641	7.57148
PFKP	0.871835	0.00180605	0.0196338	8.54491	7.67308	8.49944	8.70981	8.74085	9.00012	8.10861	9.9098	8.43651	7.82017	8.44562	7.77821	7.66725	7.19101	7.89858	8.63602	6.81934	7.74405	7.79179	7.83553	7.98814	7.15908
PFN1	1.03725	0.00858261	0.059315	5.17233	4.13507	6.31045	7.29653	5.76552	4.75041	5.3902	4.05723	4.51079	4.56838	4.54606	4.52772	4.24289	4.31952	4.79008	3.00334	3.63905	4.19019	4.45238	3.50413	3.98972	5.21946
PGAM1	0.897586	0.0331262	0.146974	9.97155	9.07397	9.45219	9.64576	10.2069	11.025	10.0174	10.4113	9.17829	8.92821	11.5163	9.33428	8.72061	10.3989	9.9562	6.81556	8.47365	9.94373	9.05096	8.83356	8.77915	9.76736
PGLS	0.63245	0.00486165	0.0397601	6.4887	5.85625	6.36858	6.58805	6.00724	6.47828	6.72171	6.03747	6.88652	7.51214	5.4688	6.81815	5.40621	5.83916	5.9469	5.2449	6.29988	5.94874	5.78933	5.91898	5.94783	6.22053
PGM1	1.63513	0.00260868	0.0254239	8.2224	6.58727	8.27762	8.05768	8.06311	8.66388	7.91933	9.35609	7.49261	8.11547	9.15551	7.12271	6.71509	7.88294	8.02909	3.71202	6.61672	6.4115	4.4198	6.81282	7.3106	7.96217
PGP	0.662858	0.014829	0.0854989	5.33231	4.66945	5.58255	5.90074	5.2749	6.10025	6.08217	4.44304	4.82883	5.3681	4.76655	4.97598	4.76847	4.42072	4.5045	6.1741	4.49663	4.44443	4.10756	4.52176	4.25292	5.00345
PGS1	0.775361	0.000684971	0.00991842	7.48586	6.7105	8.00806	6.99363	7.71182	8.21863	7.16813	7.36747	7.83066	7.91759	6.63059	7.01199	6.81282	6.48512	6.87139	5.99984	7.01383	7.00402	6.38746	6.60469	6.78347	7.14232
PHB	0.618836	0.0198426	0.104257	6.71995	6.10111	7.07054	7.96649	6.55582	6.68873	6.98823	6.20788	6.18969	6.53712	7.37282	5.62215	5.23707	6.30624	6.53633	6.97844	6.08673	5.90883	6.15509	5.82694	5.93107	6.04435
PHB2	0.799518	0.00601308	0.0459399	8.5757	7.77618	8.79308	9.40156	8.58455	8.75171	8.1513	7.20787	8.71925	9.38989	8.34055	8.41723	7.91842	8.14602	8.10321	6.34741	7.78085	7.96103	7.73455	7.61968	7.52017	8.63048
PHF20L1	0.643419	0.0118301	0.0731512	5.22582	4.5824	4.27066	5.51376	5.37659	4.35312	6.1784	5.28383	5.84368	4.76655	5.41052	5.26106	5.01211	4.90805	4.25132	3.46115	4.76095	4.55067	4.3719	4.87858	4.69011	4.93913
PHF2P1	0.689022	0.0372681	0.160244	2.51303	1.82401	2.91578	2.24955	2.13987	1.65438	1.90708	2.25409	5.2449	2.00317	2.69328	2.06821	1.74511	1.68649	1.74207	1.9431	1.90784	1.90532	1.94265	1.94135	1.69468	1.7315
PHKA1	0.587107	0.019696	0.103732	5.16798	4.58088	5.50041	5.11061	4.86428	5.51626	5.39831	5.77007	4.99203	5.39557	5.2602	3.8721	4.36401	4.5097	4.59014	3.15907	4.91495	4.57491	4.97852	4.73563	4.89024	5.0916
PHYH	1.04293	0.000456699	0.00756587	8.04969	7.00676	7.87172	9.52043	8.26373	8.2441	8.78151	8.06907	7.15985	7.64977	7.64977	7.28699	6.79566	7.56208	7.30834	5.97102	7.30834	6.8844	6.99363	6.95322	7.22192	7.06899
PI3	1.28437	0.00359244	0.0318419	4.76217	3.4778	3.71945	4.65295	5.75202	6.13797	3.39759	3.95292	7.33314	3.6506	5.08686	3.93823	3.33272	3.33605	3.82876	3.72735	3.7095	3.53355	3.59982	3.18606	3.27321	3.25097
PIGW	0.597816	0.0158382	0.089308	5.77919	5.18137	5.6625	5.8113	5.68341	6.57849	6.19254	5.81586	4.50474	5.57782	5.9215	6.04374	5.49677	5.68341	4.92057	5.30397	5.26755	4.71654	4.18365	4.79596	5.59938	5.84592
PIGX	0.929507	0.00557661	0.043546	4.32007	3.39056	4.24659	4.85497	3.27458	5.40484	5.2884	4.12823	3.45716	3.63203	5.37978	3.5341	2.70631	4.25292	3.56941	2.44345	3.33038	3.13694	3.83289	3.74796	3.37579	3.50956
PIGZ	0.688079	0.0181193	0.097861	5.53967	4.85159	5.13145	4.91364	5.33801	5.9277	7.61408	4.81802	5.57266	5.34256	5.02038	5.71822	5.35217	4.57063	5.18239	4.20215	5.26214	5.12373	4.65951	4.73595	4.66215	4.76511
PIH1D1	0.625275	0.00204862	0.0214274	7.64837	7.0231	7.5077	8.43651	7.4888	7.65421	7.5773	7.94582	7.86659	7.29112	7.05152	7.66419	7.15053	6.74118	6.99722	8.11682	6.60125	7.12114	6.97643	6.94001	6.73421	6.85221
PIK3R3	1.12126	0.00204931	0.0214274	6.02881	4.90755	5.8066	5.40068	6.45044	6.98407	7.50827	6.4932	5.10133	5.43363	6.80155	4.30833	4.99999	5.32051	5.0338	4.78505	5.10385	5.16583	4.79403	5.03085	3.8464	4.99521
PITRM1	0.875711	0.0144224	0.0840133	6.52116	5.64545	7.59226	6.56625	6.356	7.5679	5.88156	7.05631	6.2601	6.37101	5.81753	5.74272	6.03375	6.16713	6.35292	3.39677	5.49339	5.59039	6.08546	5.83683	5.29166	6.20624
PKM	0.675824	0.00457614	0.0379129	5.73578	5.05996	6.31195	6.56788	5.50101	5.95327	6.07789	4.87353	6.19717	5.11819	4.97966	5.77727	4.54246	4.79263	4.82492	5.6694	5.09082	5.33998	4.59562	5.29925	5.22883	5.21566
PKMYT1	0.654716	0.00201922	0.0212731	5.18431	4.52959	4.81823	5.41992	5.02437	5.50021	5.21456	5.12439	5.09009	5.26466	4.83169	5.55498	4.18486	4.45643	4.53597	5.85309	4.40534	3.97376	4.57696	3.9879	4.84984	4.47179
PKN1	0.682592	0.0209537	0.108462	4.75733	4.07474	5.71148	6.61537	4.26132	4.3228	4.3529	4.81328	4.3832	3.8595	4.48233	4.77113	3.30282	3.88886	4.0855	4.31248	4.15362	4.35256	4.62453	3.98082	4.42453	3.62169
PKP4	0.624456	0.0248296	0.121488	6.41753	5.79307	6.0939	6.4581	6.71509	5.95753	7.09226	5.94499	6.17653	6.67914	6.38634	6.67139	6.36104	6.24277	5.8066	3.6682	6.14552	5.97212	5.9765	5.94827	5.87117	5.9385
PLCG1	0.70096	0.00309446	0.0287355	6.20221	5.50125	6.64093	5.82806	5.89881	6.49875	6.36246	5.77608	6.83921	6.27593	5.5498	6.3521	5.47625	5.16047	5.1103	6.89759	5.67702	5.00023	5.17766	5.49677	5.50575	5.51049
PLD3	0.7546	0.00165957	0.018528	5.13117	4.37657	5.37483	5.66442	4.53171	5.36978	4.80272	4.9366	6.02946	5.4174	4.17798	5.0068	3.84684	4.3228	4.34836	5.03969	4.01887	5.07596	4.33736	4.06115	4.36732	4.34735
PLEKHO1	0.810878	0.0112326	0.0706092	4.46494	3.65406	6.27811	4.91079	4.13671	4.14758	4.92693	4.22376	4.72237	3.36227	4.25874	3.68212	3.48256	3.62065	3.75461	2.60164	3.45423	3.83235	3.10845	4.23694	4.05548	4.39373
PLK4	0.967621	0.000298169	0.00553307	3.91891	2.95129	4.00883	4.99169	3.90778	4.01451	3.49839	3.90672	3.59756	3.95868	4.43315	2.87178	2.89414	4.01733	3.23839	2.30757	2.56002	2.86659	2.66364	2.83821	2.86264	3.26434
PLOD1	0.922313	0.0171437	0.094367	7.10602	6.18371	8.75363	7.86021	7.0977	7.21164	7.53522	7.70239	7.19271	6.45094	5.25597	5.99984	6.21542	5.99235	6.40882	7.77509	5.9678	5.39063	5.80917	5.80344	5.83229	6.64209
PLSCR3	0.671495	0.0245709	0.120858	6.16866	5.49717	7.6904	5.58009	5.79552	5.88574	6.04962	5.52639	6.70172	5.86298	5.65965	6.93451	5.18215	5.75329	5.05911	6.88652	5.27196	5.61152	5.26409	5.0515	4.95953	5.93201
PLTP	0.87841	0.0425431	0.17451	6.25695	5.37854	7.0542	7.53617	5.83508	5.66702	3.42216	6.27324	7.72162	6.59769	5.5385	6.92385	5.46692	5.91138	5.60675	4.13363	5.08373	6.26773	5.42442	5.32353	5.29811	5.26923
PLXNA1	0.608711	0.000696376	0.0100392	6.46148	5.85277	6.25336	5.93282	6.55678	6.48853	6.72095	6.65972	6.83968	6.4175	5.9385	6.80695	5.94228	5.43237	5.53598	6.69842	5.91071	5.68922	5.75202	5.73393	5.85168	5.98105
PMM2	0.802214	0.000600379	0.00907761	5.97101	5.1688	6.67732	5.99127	6.1438	6.08157	5.7226	5.9169	5.70571	5.84208	5.53756	6.09128	5.06459	4.87286	5.27086	6.62444	5.01551	5.19876	4.778	4.63752	4.85612	5.36933
PMS2P1	1.01127	0.000162444	0.00354272	7.78438	6.77311	8.14814	7.34161	7.67901	7.04328	7.96217	8.13572	7.69573	7.9269	7.06395	8.84729	7.448	6.33984	6.37403	6.50675	7.49353	6.69126	6.18275	7.11322	7.00263	6.57907
PMS2P5	1.10791	0.00217344	0.0223705	8.19338	7.08548	8.48548	7.69388	8.19647	7.36095	8.37174	8.50658	8.28366	8.37858	7.4409	9.21559	8.28614	6.63059	6.70742	5.20606	7.95998	7.36404	6.45191	7.77987	7.53427	6.93451
PNKP	0.973741	0.00132445	0.0158107	5.92849	4.95475	5.8941	7.4837	5.60709	6.23596	5.97733	5.90827	5.083	5.9543	4.80829	6.33284	4.30286	4.96908	5.11291	4.19892	5.42706	5.61901	4.69593	5.28212	4.65826	5.28133
PNPLA6	0.629654	0.0447719	0.180385	5.60052	4.97086	7.16403	6.35753	5.01589	5.28212	4.69731	4.59599	6.45771	5.1278	4.85531	6.45147	5.40809	4.8991	4.91539	5.19901	4.26618	4.94933	4.55145	5.32353	5.28542	4.91112
PODXL2	0.731459	0.000946597	0.0125714	3.39001	2.65855	4.00201	3.71851	2.95108	2.69454	3.84726	2.88299	4.15536	2.76496	3.16575	3.71768	2.66124	2.71098	2.26003	2.45268	2.88144	2.69715	2.82551	2.507	3.16412	2.42538
POLA2	0.87759	0.0043841	0.0366978	5.08873	4.21114	4.4596	6.35437	4.96593	4.88646	5.6286	5.04573	5.58088	4.98945	4.7749	4.20137	3.87729	4.20686	3.88193	5.70229	4.62222	4.4177	3.55406	4.32262	3.2682	4.25823
POLD1	1.05282	0.0166188	0.0923347	6.38646	5.33364	6.77628	7.93977	6.19521	6.35864	6.79844	5.6843	6.25773	6.35499	5.31735	6.18186	5.06459	4.5589	5.02998	8.50243	5.09677	4.76408	5.68524	4.56334	4.8064	5.26466
POLE	0.864705	0.00901099	0.0615313	6.07759	5.21289	7.08646	6.49555	4.90505	6.50675	6.35084	5.54725	6.64842	6.03933	5.22266	5.97363	5.65015	4.99494	4.9364	6.94116	5.09036	4.73701	4.38222	4.92937	4.72434	5.74295
POLE2	1.30138	9.6747e-07	8.6518e-05	5.78743	4.48605	5.58009	5.68029	5.37791	6.07849	5.23707	6.15019	5.15229	5.95327	5.76016	6.90453	4.21058	4.4781	3.84576	4.65693	4.81199	4.14061	4.83393	4.79223	4.51161	4.57873
POLQ	2.19708	2.89869e-09	1.51721e-06	5.82986	3.63277	5.84492	6.09741	5.79972	6.00901	6.44912	6.57024	5.18475	6.11633	5.82997	4.39711	3.85678	4.21219	3.37208	4.13057	3.51488	3.751	3.08531	3.19491	3.72231	3.48769
POLR2G	0.616721	0.0104277	0.0669211	9.21139	8.59467	8.18181	9.5768	9.41204	8.55478	9.44576	9.96042	9.98826	8.59623	9.25445	9.14335	8.35046	8.86825	8.84729	7.65545	8.83865	8.59998	8.40594	8.77534	8.64943	8.95589
POLR2H	0.836507	9.54272e-06	0.000439954	9.91677	9.08027	10.1942	9.6534	9.83099	9.46704	10.4279	10.05	9.8353	9.8353	9.65745	10.2162	9.13579	8.87441	8.70293	9.09942	9.44915	8.95328	8.54226	9.32179	9.60661	9.11703
POLR2I	0.896962	0.0238483	0.118351	7.47017	6.57321	9.10335	7.01035	7.08039	6.89046	7.45561	7.15296	8.11941	8.30009	6.27144	7.31762	6.49202	6.48048	6.92822	4.17712	6.61356	7.36042	7.17058	7.48207	6.49202	6.53557
POLR2K	1.17027	0.000395815	0.00679915	6.68266	5.51239	6.45588	7.90317	6.50362	7.09985	6.71834	7.19477	6.23596	5.33352	7.13871	6.24277	5.08919	6.48925	6.00724	4.6997	5.42616	5.61468	6.19486	4.7971	5.11612	5.68954
POLR3F	0.624615	0.0101816	0.0659839	5.55774	4.93313	5.44656	5.18282	5.47195	5.54531	5.00748	5.14414	6.89474	5.33216	6.39376	5.15851	4.76655	5.30641	4.88369	4.1008	5.53304	5.22778	4.92852	4.99027	4.69436	4.89989
POMGNT1	0.723495	0.0311358	0.14135	6.04572	5.32223	8.36582	6.72583	6.02759	5.14015	5.69843	5.50543	6.65467	5.35418	5.49192	5.4932	4.60774	5.41893	5.37388	5.6625	5.48243	5.05839	5.42442	4.81608	5.78007	5.59783
POP1	0.836088	0.00776855	0.0551262	5.15907	4.32298	5.15295	5.78714	5.15731	4.69764	5.18309	5.96589	4.94139	5.52032	4.98516	4.19977	4.90954	4.65358	4.83567	2.88652	4.71913	4.29045	3.07121	5.37304	4.20137	4.28928
POP5	1.10048	0.00901656	0.0615313	6.52461	5.42413	7.51334	5.77939	6.6114	6.49465	6.74341	5.32083	6.99802	6.89708	6.32586	6.56211	6.04858	5.66972	5.78972	2.29689	5.45182	5.8066	5.90157	6.07567	5.30397	5.89674
POP7	0.873145	0.000517476	0.00820767	7.73042	6.85727	7.24838	7.9269	7.96738	8.42221	8.96187	7.62416	7.697	6.84998	7.08325	7.52307	6.46603	6.92464	6.9978	6.99363	6.76737	6.93332	7.43107	6.71954	6.41111	6.92822
POU2F3	0.898668	0.00317314	0.0292738	3.55384	2.65518	3.7976	2.38698	3.80178	3.85441	4.70248	4.83047	3.17082	2.80793	2.59794	3.58803	3.10989	2.45437	2.6109	2.01678	2.39139	2.92661	2.76791	2.55033	2.60211	3.12146
PP14571	0.828981	0.0118848	0.0734381	2.97332	2.14434	3.23495	2.7631	2.33583	3.99786	3.11681	5.19626	2.53136	2.2876	2.03981	2.22962	2.25388	2.00339	1.77553	2.0846	2.52013	2.01786	2.17759	2.18505	2.41171	2.01364
PPA1	0.86077	0.00931698	0.0626481	10.3929	9.53214	9.60661	10.7747	10.3768	10.4738	9.92089	10.7633	9.50935	10.0909	12.5384	9.87429	9.68808	9.93533	9.86227	8.85434	9.62885	9.03125	9.99341	8.96545	9.15551	10.2069
PPAN	1.18262	0.00208219	0.0216948	7.76359	6.58097	9.02645	8.11234	7.65746	7.53522	7.4837	6.93568	8.6193	7.20578	6.71834	8.34166	7.03881	6.04485	5.76067	8.7501	6.53453	6.23846	6.17963	6.07906	6.56323	6.62034
PPAT	0.86336	0.00355162	0.0316181	6.12507	5.26171	6.27454	6.92822	6.39438	5.89674	6.36534	6.91075	5.43534	5.88918	6.81535	4.34088	5.6301	5.70359	5.25273	5.31949	5.49164	4.75524	4.76274	4.92214	5.62215	5.15731
PPFIA4	2.45003	9.02254e-08	1.86939e-05	6.02614	3.57611	7.20902	6.22104	6.52718	6.94116	5.30205	6.37323	6.31455	5.2212	5.87793	4.27403	3.93358	3.09609	3.71745	4.76847	3.22386	3.41325	3.15747	3.4392	3.88955	3.12217
PPFIBP1	1.02995	0.000159908	0.00350892	5.78862	4.75867	6.16386	5.61056	5.81216	5.99984	5.99488	4.54148	6.36534	5.98171	5.1983	6.2181	5.11291	4.57394	4.59827	3.97376	5.29843	4.53802	4.24007	5.30253	5.38101	4.56776
PPHLN1	0.590215	0.00859112	0.0593278	4.53449	3.94428	4.82905	3.9116	4.42873	4.04392	4.64971	4.21943	5.16512	5.80431	4.03446	4.25859	4.32883	3.79316	4.26845	3.31994	3.96406	4.15764	3.81954	4.04093	3.88417	3.86606
PPIE	0.679062	0.00363047	0.0320476	6.02537	5.34631	6.12346	6.23846	6.38787	5.51127	6.1741	6.36715	5.79297	6.74894	6.16339	4.74615	5.56482	5.51166	5.54297	5.48984	4.97852	5.60459	4.9776	5.71641	4.55695	5.51977
PPIF	0.629215	0.00542998	0.0427575	5.52257	4.89336	4.89796	6.48433	5.6537	5.19901	5.80775	5.70984	4.53802	5.67135	6.19043	5.07336	4.96737	4.58503	4.79294	5.48161	4.974	4.94235	4.52772	4.6378	4.94346	5.08133
PPIH	1.14331	0.000139878	0.00315897	7.98398	6.84066	8.53233	8.18181	8.32201	7.42773	8.58753	8.59029	7.40028	7.67165	8.09561	7.03051	7.23321	7.34531	6.87139	5.65462	6.78975	6.92284	7.16094	7.56208	6.06242	6.80406
PPP1CA	1.03315	6.36061e-05	0.00177532	7.15028	6.11713	7.39645	7.97031	7.19101	7.22416	7.15616	7.28562	7.0913	6.54233	7.34161	6.30383	6.33779	6.31406	6.53712	5.4838	6.23551	6.41628	5.53453	5.90214	5.48625	6.92385
PPP1R13L	1.34771	0.000968665	0.0127314	6.20356	4.85584	6.75399	5.00284	6.33779	5.56727	5.69754	6.46139	8.50101	5.45919	4.90681	7.34775	5.2686	4.24776	4.64485	5.27196	4.6063	5.03032	4.60346	4.58452	5.1319	5.16874
PPP1R14B	1.37366	0.000209091	0.0042918	7.83732	6.46366	8.13948	9.76329	7.94291	7.27695	8.53013	6.94939	8.22597	6.31582	7.21404	8.01521	7.16968	6.12643	6.42048	6.48971	6.5875	6.1294	6.00062	6.27188	6.67283	6.76804
PPP1R16B	0.806617	0.0299993	0.137808	5.00309	4.19647	4.05014	4.0965	4.30033	4.19296	4.10781	6.96864	5.47367	5.31909	6.3414	5.18033	4.0165	4.79556	3.79692	4.20023	3.74796	3.94624	4.01186	4.01392	4.00998	5.42555
PPP2R3A	0.598148	0.00535053	0.0423953	6.31579	5.71764	6.13038	5.46843	6.86296	6.03413	6.13623	6.29787	5.95378	6.30733	7.53427	6.43248	5.88689	6.07303	6.07519	5.31394	5.42442	5.44515	5.76361	5.71435	5.91805	5.56177
PPT1	1.18295	0.00373931	0.0327323	8.23057	7.04762	9.15275	7.20295	8.87744	7.80057	7.86496	8.19086	7.45561	8.76154	8.65555	8.3435	6.82487	7.28431	7.60456	4.42072	7.60001	7.60718	7.74488	6.5258	6.88263	7.98124
PRADC1	0.668973	0.00916645	0.0621196	5.90794	5.23896	6.25967	5.97948	5.30079	5.66896	6.34741	6.13543	5.63287	5.27099	6.37339	6.11037	5.23033	5.21981	5.25631	6.97708	4.81972	5.15402	5.18889	4.8665	5.00811	4.66886
PRAME	2.73528	9.16933e-08	1.8756e-05	6.17789	3.44262	6.83669	8.36261	5.2206	4.95547	6.81088	5.99044	4.98347	7.0673	5.53089	6.02058	3.45616	3.19794	3.52014	4.17199	3.60517	2.93493	3.71012	3.57609	3.07247	3.18113
PRC1	3.58759	6.3371e-09	2.81938e-06	7.6819	4.09431	8.28131	8.5499	6.9298	7.86021	8.71497	8.57698	6.59661	7.01199	7.94582	6.35137	3.02271	5.50946	4.67858	2.85913	4.61313	4.21126	4.43384	3.1747	3.33856	5.10169
PREB	1.16234	0.00155426	0.0176642	6.51472	5.35239	7.83852	6.37205	6.4227	7.05254	6.42248	6.13979	6.17227	6.13202	6.22954	6.36534	5.40068	5.99044	5.90385	2.85913	5.832	5.42733	5.63395	5.59158	5.8613	5.02362
PRELID1	1.21786	3.23353e-07	4.20028e-05	7.24941	6.03156	7.60456	7.98425	6.98747	6.87479	7.43005	7.22447	7.33002	6.90239	6.79449	7.36164	6.27919	6.16271	6.28199	5.58796	6.07446	6.08395	5.98207	5.28294	5.9977	6.5826
PRELP	0.972383	0.00788692	0.0557602	6.12356	5.15118	6.54746	4.75638	6.3428	5.89384	5.12671	5.78121	5.57477	7.82324	7.40265	5.98656	5.62333	4.4167	5.2602	5.12671	6.18377	4.40848	4.68109	5.07517	5.04591	5.69045
PRIM1	0.805687	0.0221458	0.11257	4.99296	4.18727	4.32473	5.21425	4.46541	6.19393	4.25427	5.50061	4.4146	5.51528	5.95642	4.09006	3.34439	5.16837	4.7731	3.29153	5.33295	4.49015	3.74375	4.41649	3.2821	4.02985
PRKAB2	0.591678	0.0247315	0.121312	5.46669	4.87501	4.42438	4.57369	5.98243	5.67939	5.91332	5.2073	5.44866	5.53009	6.49024	5.4174	3.92231	4.84079	4.99783	5.72139	5.41923	5.23971	4.76774	4.76433	4.51049	4.56632
PRKAG1	0.590359	0.00711493	0.0518074	5.91256	5.32221	6.23846	6.16987	5.3758	5.401	5.94057	6.49251	6.07698	6.19089	6.16271	5.07686	6.13823	5.77134	5.61999	4.51261	5.20258	5.11291	5.27809	5.16131	5.35345	5.07153
PRKCSH	0.634458	0.041409	0.171216	6.39889	5.76443	6.94485	6.8844	5.82317	5.65062	5.85747	6.27524	7.99958	5.75662	5.20606	7.5909	5.61794	5.63989	5.47497	5.22977	6.25249	5.62924	5.83508	6.0352	5.72217	6.20757
PRKCZ	0.672199	0.0474135	0.187421	7.54085	6.86865	7.19023	6.5823	7.83553	7.45268	7.37173	7.41324	8.32427	9.03125	6.21069	7.99656	7.50076	6.89759	6.98681	5.16949	7.1956	7.49947	6.87925	7.35483	6.74778	6.45491
PRMT1	0.691294	3.53935e-06	0.000209954	4.78005	4.08876	4.56511	5.0444	4.48283	4.78482	4.95511	4.92373	4.91309	5.28027	4.41494	4.43621	4.17874	4.11893	4.16921	4.16602	4.03829	4.0266	3.94987	3.94489	4.02072	4.27429
PRR3	0.646796	0.00354458	0.0315871	5.15256	4.50577	5.18782	5.29213	5.65965	4.44337	5.23707	4.22595	5.11291	5.57108	5.09892	5.69671	4.21974	4.66289	4.70022	3.86015	4.16125	4.67313	4.04444	4.78171	4.77646	5.17766
PRSS2	1.04721	0.00108693	0.0137531	5.29265	4.24545	3.74459	5.50101	5.52454	6.71121	4.87628	4.66621	5.54902	5.23971	5.79624	5.3177	4.58503	3.83044	4.10223	5.46648	3.78254	4.26907	4.28801	3.99807	4.20617	3.92642
PRSS21	1.02468	0.00528106	0.0420838	4.88219	3.85751	5.89674	6.46889	3.31353	3.35775	4.8771	5.92387	4.87286	4.87404	4.36401	4.8731	3.79973	3.68136	3.96259	4.23262	4.36322	3.61939	3.53691	3.84974	3.2192	4.31029
PRSS23	0.721979	0.0308832	0.140706	5.81731	5.09533	5.94499	6.36581	6.10567	5.80519	7.59783	5.30904	4.58236	5.15017	5.9277	5.3843	4.79556	5.61867	5.62037	6.40443	4.73907	5.44126	4.49767	4.67896	4.78482	4.37246
PRSS8	1.75399	1.29921e-06	0.000103953	6.21559	4.4616	6.61175	7.58436	6.06157	6.43458	6.11807	6.81934	6.09539	4.99299	5.82552	5.61236	4.35583	5.00056	5.15929	4.95726	3.94381	3.65404	4.74752	4.17103	4.09857	4.52808
PRTFDC1	1.31159	0.0201249	0.105305	6.12466	4.81307	6.18186	3.74212	5.18388	8.34771	5.3506	7.42917	5.17672	6.03933	6.56935	7.22585	4.3086	4.48638	4.70782	2.35772	6.0796	4.70134	4.78844	5.27437	4.71977	6.70667
PSAT1	1.38901	0.000272835	0.00518182	6.45603	5.06702	5.60459	7.30146	6.51986	5.63207	6.75782	5.50268	6.88039	6.41514	6.1197	7.8266	4.99824	5.65656	5.16768	3.23959	5.15551	5.07879	5.51724	4.61859	5.36338	5.87461
PSMA7	1.21377	0.0018918	0.020281	8.07974	6.86597	7.72366	7.43439	7.97793	8.04147	8.55478	7.29388	8.91026	8.6606	8.2441	7.95635	7.42773	7.74014	7.08544	4.26585	6.63461	7.28431	6.23684	7.60987	7.0658	7.30913
PSMB2	0.759818	4.21564e-06	0.000239685	6.45769	5.69787	6.28236	6.10997	6.5061	6.24923	6.42353	6.43248	6.52441	6.99446	6.33343	6.72095	5.83315	5.83315	5.86627	4.98668	5.70287	5.88452	5.67623	5.76679	5.70984	5.71923
PSMB5	0.630626	0.0154424	0.0878816	7.89205	7.26143	8.49539	8.89056	8.09256	8.28131	6.90104	7.89437	7.29844	7.96649	7.67901	7.42136	7.20367	8.06077	7.74696	6.5638	6.68583	7.57067	7.51292	7.62642	6.69743	6.94579
PSMB7	0.589077	0.0180779	0.0977853	9.0378	8.44872	9.18462	10.1163	8.56031	8.89056	9.00826	9.1764	9.36227	8.93623	9.30959	7.83343	8.41723	8.88519	8.77534	7.23486	8.37174	8.66885	8.37718	8.75776	8.305	8.69408
PSMC4	0.719042	0.00348127	0.0312611	5.77014	5.0511	6.39822	5.66128	5.21048	5.71971	5.62272	5.6814	5.96924	6.18275	4.95467	6.30092	5.38248	5.17197	5.29229	3.7624	5.32353	5.08239	4.83668	4.78971	5.02362	5.84592
PSMD14	0.964751	0.00702369	0.0512269	8.65161	7.68686	7.93756	9.60661	8.55157	9.07901	9.08919	9.03489	8.12804	8.49112	8.6606	7.93756	7.54502	8.32427	8.22711	5.20362	7.93977	7.66963	8.49469	7.74696	7.71594	8.00163
PSMD2	0.859993	1.90374e-05	0.000733312	10.0303	9.17027	10.6386	10.3064	9.64576	10.5464	10.1322	9.52786	10.1251	9.6335	10.3934	9.35336	8.93216	9.3501	9.09942	9.13579	9.36956	9.19078	8.98644	9.42538	8.98228	9.23083
PSMD8	0.86842	6.05753e-05	0.00172181	7.14261	6.27419	7.09903	7.73883	6.56173	7.28902	6.99888	7.60001	7.19686	7.53892	6.97395	6.42885	6.17754	6.34509	6.5239	5.94349	6.22983	6.5638	6.63727	6.43914	5.46766	6.41417
PSME4	0.608019	0.0296936	0.136792	6.55299	5.94498	6.00294	5.44676	7.32368	6.83741	6.27001	6.92059	6.4003	7.01419	6.83669	6.47738	6.53774	6.48656	6.0699	4.22856	6.19807	6.26714	5.80615	6.26175	5.85547	5.73841
PSMF1	0.689052	0.0110702	0.0698173	7.17695	6.48789	6.43135	6.96515	7.04493	7.34827	7.18849	6.73349	8.285	6.72814	7.51137	7.53329	6.50434	6.72629	6.83021	4.82527	6.54952	6.81413	6.56424	6.34452	6.62518	7.09526
PSRC1	2.17162	1.29537e-06	0.000103953	6.89468	4.72305	6.71602	6.72583	6.39638	7.12719	7.70785	7.43203	5.63415	8.23553	7.46778	5.50401	4.55214	4.61461	4.74179	5.63989	6.00109	3.94699	4.29356	4.46095	4.74037	4.23915
PTCD3	1.04767	0.0125484	0.0762999	8.31426	7.26659	8.69523	7.14582	8.39242	7.76162	8.42547	8.5981	8.10061	10.3184	7.33914	8.36582	6.36715	7.81409	7.60907	4.97475	7.84793	7.14128	7.56734	7.67997	8.20946	7.45488
PTDSS1	1.2878	5.06642e-07	5.39893e-05	9.00165	7.71385	8.91575	9.44082	8.71925	9.58863	9.07669	9.24012	8.9059	8.2878	8.92582	8.91575	7.37761	7.98425	7.97125	6.92464	7.58263	7.4569	7.93756	7.35004	8.22802	8.32563
PTGS1	0.747632	0.00890581	0.0610038	7.7864	7.03877	7.37003	8.13572	7.52407	7.31661	8.74718	8.38519	6.3799	8.23431	8.46397	7.30703	7.19023	7.38189	7.62202	6.1609	7.07054	6.42398	7.02823	6.81142	7.36095	7.33753
PTH2R	3.55167	5.15423e-05	0.00153693	6.02489	2.47322	7.48446	7.88174	2.10405	2.07268	6.76902	6.14552	7.05753	8.2511	4.80898	7.6738	4.07449	2.31131	2.5034	2.00687	2.1634	2.13987	2.15239	2.09612	2.44039	2.84393
PTMS	0.681056	0.000972096	0.0127577	4.64392	3.96286	4.96879	4.27236	5.14341	4.5921	4.72987	4.05047	4.69848	5.44829	3.90095	4.63446	4.1351	3.56915	3.72278	4.40734	3.97613	3.84548	3.75164	4.52038	3.85172	3.84889
PTOV1	0.938839	0.00294639	0.0276696	7.07491	6.13607	8.35859	8.47512	6.63018	6.90663	6.63981	6.45895	7.29559	7.34022	6.0357	6.6083	6.39934	6.02623	6.21381	5.03969	5.99586	6.55935	6.32095	6.47543	5.80306	6.52697
PTPLB	0.898422	0.032045	0.143936	8.16092	7.2625	7.61197	8.0045	8.29741	8.57393	7.97031	8.46554	7.40265	8.3435	9.44312	7.4963	7.22585	8.27867	8.1316	4.18582	7.57559	7.548	7.75841	6.72375	7.69954	7.49779
PTPN6	0.646984	0.0437052	0.177494	5.34072	4.69373	6.04143	5.70984	5.24523	5.20198	5.00418	4.90974	5.77608	5.61552	4.16045	5.74272	4.43586	4.298	5.04267	2.53148	5.10837	4.94933	5.03514	5.30942	4.80088	5.42616
PTTG1	2.04629	4.39393e-08	1.18176e-05	7.77026	5.72397	6.85351	8.16592	7.69164	8.60163	6.97242	7.9445	8.64166	7.74328	8.03466	7.05335	5.73343	6.19089	5.41852	6.06608	6.28164	6.06201	5.27931	4.84655	5.26289	6.09834
PTTG3P	0.709842	0.000391978	0.00675934	3.25688	2.54704	3.02404	3.25156	2.99121	3.22079	3.06154	3.2967	3.79721	2.93836	3.88712	3.10025	2.47894	2.87054	2.84494	3.48879	2.45437	2.23316	2.21612	2.20955	2.52957	2.14438
PUF60	1.01386	0.000275893	0.00522317	7.87785	6.86399	7.86021	9.43475	7.53091	7.44733	7.80057	7.74608	8.05684	6.94725	8.58455	7.37003	6.35384	6.98354	7.10308	7.20787	6.61356	6.6816	7.34496	6.82546	6.64945	6.87659
PUS1	0.828884	0.00377043	0.0328799	6.76098	5.9321	7.27623	7.08192	6.3428	6.67605	6.16052	6.22734	7.2687	7.42846	5.70137	7.44641	6.68805	5.17988	5.78315	6.09539	5.75526	5.10621	5.59722	5.95504	6.62444	6.53633
PUS7	1.21234	0.000171585	0.00370573	8.30316	7.09082	7.75231	9.05096	8.88149	8.62909	9.11957	8.72798	7.23207	8.20266	7.5039	7.93155	7.43055	7.03511	7.01593	7.59532	6.51888	5.86833	7.13441	7.11861	7.88591	7.30516
PVRL3	1.282	0.0307825	0.140355	5.89679	4.61478	5.15851	5.60928	5.53047	7.53001	7.84294	7.4623	3.07384	3.96466	7.29909	5.49677	3.13182	4.55515	5.50221	3.74009	4.34369	4.03234	6.44006	4.32122	4.81118	5.27006
PVRL4	0.890726	0.00134187	0.0159518	5.87626	4.98554	5.47748	4.79008	6.28463	6.37205	6.23931	6.65415	5.73088	5.56482	5.9065	5.74272	4.1972	5.01533	5.15472	6.08673	4.39711	5.17484	4.82342	5.70809	4.69708	4.60084
PXDN	1.22539	0.000535601	0.00836835	8.4924	7.26701	8.54226	7.729	9.24953	9.62885	8.17094	8.37718	9.77934	8.49651	6.65748	8.29294	7.32779	7.31584	7.37908	8.12685	7.36556	6.85465	6.67486	7.01707	7.25841	7.35004
PXMP4	0.836396	0.0014261	0.0166638	5.33023	4.49383	4.81199	5.19626	4.91934	6.00463	5.09786	4.94375	5.9543	4.33525	6.31582	5.72305	4.56869	4.3562	4.85531	4.93221	3.89796	3.83727	4.75672	4.74802	4.74204	4.24389
PYCRL	0.714982	0.0308956	0.140709	4.87918	4.1642	5.15128	6.92059	4.37653	4.20407	5.23707	5.27913	4.41819	4.403	4.36267	4.43928	4.01485	4.08692	3.93958	5.65503	4.26743	3.96406	4.70692	3.8125	3.55358	3.64113
PYGB	0.809598	0.000494342	0.00791837	7.46077	6.65118	8.78644	7.25463	6.89537	6.96413	6.99275	7.43107	7.83476	7.69832	7.60413	7.14613	6.78377	6.73661	6.51077	7.14552	6.50853	6.57975	6.9732	6.74444	6.31195	6.21721
RAB10	0.737354	0.0309329	0.140788	8.40285	7.66549	8.01625	7.03511	8.80172	8.77915	8.05768	8.59623	8.43848	8.88149	8.47208	8.95028	7.89626	8.38641	8.14814	5.21677	7.57067	7.94679	7.87498	7.63208	7.86496	8.11786
RAB26	0.688457	0.0168881	0.0932487	5.04225	4.35379	4.34716	6.68639	4.88416	4.06049	5.44829	5.10443	4.31629	5.30942	5.94544	4.32044	4.07761	4.33342	4.26934	4.31248	4.74281	4.84443	4.51049	4.1697	4.25557	4.02209
RABAC1	0.587763	0.0465414	0.185043	6.9408	6.35303	7.01135	6.4003	7.2389	7.7817	6.78929	6.79566	7.27761	7.22192	7.45561	5.43562	7.09839	6.79844	6.74073	4.84042	5.82356	6.03117	6.41514	6.68332	6.66053	6.43863
RACGAP1	2.77566	2.04362e-07	2.98101e-05	7.26946	4.4938	7.11059	6.64892	7.45084	7.79847	7.38391	7.60456	7.35549	7.92177	7.88502	5.53504	3.65945	5.64305	4.79997	5.07096	4.9215	3.53355	5.97801	3.11856	3.39833	4.81464
RAD21	1.21727	5.48049e-05	0.00160222	7.95656	6.7393	6.98407	8.73255	8.21863	8.02165	8.89056	7.99335	7.99714	6.88703	8.48992	7.35072	6.63959	7.16353	6.79643	6.03262	7.13676	7.11176	6.57787	6.36199	6.45462	7.11777
RAD51	0.693112	7.07246e-05	0.00191862	4.21844	3.52533	3.91258	5.08507	4.26802	4.34735	4.52469	4.19944	4.19808	3.90758	4.04557	3.69599	3.80327	3.62829	3.6345	3.1844	3.48638	3.4906	3.73465	3.37208	3.40705	3.51204
RAD51AP1	3.0507	8.76206e-08	1.85631e-05	7.00828	3.95759	6.56043	7.51738	6.85772	7.5077	6.68044	7.36249	6.50099	7.49151	8.29741	5.30677	2.67586	5.6676	3.72914	3.39098	3.56002	4.53768	5.24523	3.67486	2.74716	4.34735
RAD54L	2.39411	6.59571e-08	1.59745e-05	6.78028	4.38617	8.73255	6.18275	7.17058	6.18275	7.11777	6.8745	7.04588	6.72938	6.64265	5.12402	4.15196	4.38082	4.06287	4.70518	4.7749	4.30614	4.86031	4.20482	3.84602	4.56869
RAE1	0.833942	9.90152e-07	8.76654e-05	6.13637	5.30243	6.26714	6.22505	5.79257	6.28827	6.26079	5.66342	6.72583	6.22825	5.99644	5.91596	5.401	5.37894	5.42555	4.93429	5.38286	5.50436	5.2012	5.42555	5.36536	5.0052
RALA	0.82553	0.00842419	0.0585613	7.21163	6.3861	7.86264	7.35984	6.69352	7.75231	8.77135	5.55817	7.46678	6.70806	6.76958	7.17409	6.7268	5.86627	6.49524	5.97529	6.36398	6.0516	6.10707	6.84958	6.9658	6.45943
RALGAPB	0.844969	0.0081085	0.0569451	6.66107	5.8161	6.68805	6.47953	6.27375	6.539	6.3262	6.5668	6.94236	7.0213	6.95961	6.81413	5.9543	6.33034	5.90488	3.28605	6.0907	6.10707	6.27811	6.42831	6.21322	5.56805
RALY	1.07699	0.000808061	0.0112083	7.86142	6.78443	9.05949	7.89545	7.14072	7.47341	8.12978	7.03316	8.46164	8.10661	7.63044	7.68347	7.31524	7.05825	6.82951	5.06338	6.78676	6.33245	6.78493	7.08705	7.27008	7.31661
RASAL1	1.16038	0.00126156	0.0152151	6.53529	5.37492	6.72042	6.25882	7.11094	7.45415	5.69404	5.89734	7.63813	5.61198	5.50672	7.46038	6.47738	4.88163	5.79418	5.78838	5.18107	4.44611	5.07915	4.76376	5.64893	5.68857
RASIP1	0.942223	0.00119494	0.0146757	5.17348	4.23126	4.78026	5.34564	5.57437	4.66215	5.13329	4.42468	5.94021	4.13946	5.64893	6.08583	5.19795	4.24065	4.33175	4.37216	4.30199	3.29646	3.92406	4.04463	3.89664	4.70631
RASSF1	0.898774	0.00468751	0.0386843	5.61862	4.71985	6.48971	7.44478	5.60962	5.23137	5.05484	5.5508	5.19029	5.34815	5.51251	4.75414	4.91151	4.7819	4.32239	3.50895	4.5697	4.81766	4.76408	5.01449	5.44676	5.06102
RBCK1	0.827116	9.47582e-05	0.00237794	7.32462	6.4975	7.0673	7.65266	6.91776	7.09839	7.78387	6.74778	8.27985	7.25972	7.02563	7.41324	6.56173	6.1385	6.45996	6.99091	6.89759	6.5239	6.31879	6.17608	6.28573	6.62186
RBM28	0.848608	2.96437e-05	0.0010145	7.7456	6.89699	7.98124	7.58794	7.29166	7.52407	8.08317	7.43722	8.41328	7.30834	8.13431	7.69475	6.87202	6.72171	6.39268	6.70918	6.92141	7.00747	6.53195	7.1138	7.41538	7.28431
RBM33	0.662292	0.00340258	0.0307684	4.07639	3.4141	3.2181	3.87269	3.89583	4.7029	4.86	4.03467	4.27209	4.32682	3.57158	4.0092	3.77697	3.46686	3.25968	2.42458	3.51966	3.64314	3.52471	3.10438	3.96594	3.45506
RBM42	0.805072	0.00398877	0.0342919	7.32889	6.52382	8.68226	7.58997	7.0913	7.01854	7.23273	6.0701	8.05901	7.77509	6.71121	7.05872	6.85297	6.19254	6.57134	5.62635	6.65293	6.75255	6.44613	6.7003	6.81867	6.62444
RECQL4	1.56122	6.06637e-05	0.00172181	6.32067	4.75945	6.31818	7.67901	5.61056	6.59263	7.21288	6.47882	6.2787	5.51312	5.98823	5.53453	4.81403	4.72327	4.46929	6.79122	4.28211	4.49847	4.5045	4.26802	4.99521	4.24834
REPS2	0.623392	0.00914697	0.0620585	4.81215	4.18876	4.65358	4.2178	4.66646	5.00307	4.59165	5.64716	5.05588	4.39042	4.67896	5.21652	3.9879	5.0104	4.69369	3.99575	3.58892	3.81776	5.0241	4.24659	4.17489	3.3476
REST	0.620352	0.00973257	0.064196	6.8329	6.21255	6.00878	6.76958	6.8028	6.85064	7.58545	6.69743	6.94725	7.16353	7.54162	5.96196	5.68886	6.63681	6.72375	5.3217	6.32348	6.73058	6.04354	6.15656	6.04435	6.45588
RFC3	0.8797	0.000651134	0.00962424	4.82799	3.94829	4.34427	5.5901	4.76194	5.39422	4.35857	4.85214	4.85531	4.14853	5.64974	4.32506	4.04333	4.5799	4.40385	2.98846	4.00551	4.00998	4.00201	3.54841	3.64981	4.25161
RFC4	1.88261	1.18596e-07	2.05917e-05	8.28968	6.40707	8.20445	8.23553	8.50847	8.62705	8.67238	7.96649	7.65833	8.40432	9.319	7.30078	6.44723	7.04588	6.54292	5.08686	6.65219	6.25249	5.93986	6.63768	6.68301	6.78261
RFC5	0.710572	0.019641	0.103491	5.63557	4.925	5.71252	5.04961	5.66031	6.10366	5.55695	4.93795	6.12281	5.17347	6.02405	6.01439	4.40667	5.11104	5.09009	2.77813	5.61393	5.39264	5.01449	5.3358	5.3418	5.16543
RFXANK	1.06375	0.00228795	0.0232002	6.82083	5.75708	7.13441	7.17725	7.4409	7.08192	5.95116	6.29034	8.21066	5.4127	6.0701	7.43888	5.99235	5.69636	5.82651	4.31248	6.03117	6.43694	5.81283	5.74743	5.63287	6.08187
RGL2	0.841376	0.0101119	0.0656998	8.17429	7.33291	8.26876	9.6187	7.74908	7.04887	8.83964	7.81559	9.12485	7.61408	6.75739	8.9059	7.29653	6.98078	7.44733	6.64409	7.34161	7.81116	7.29844	7.63632	7.4828	7.39006
RGS19	0.783571	0.0011411	0.0142569	7.189	6.40543	7.24764	6.99944	7.12023	7.41729	5.99273	7.32368	7.97125	7.49222	6.60389	7.72162	6.39768	6.20077	6.41564	6.38322	6.24185	6.58805	5.98483	6.07163	6.44509	7.32552
RIMS3	0.866224	9.09569e-05	0.0023058	4.33262	3.46639	4.59165	3.99484	5.36978	4.17966	3.70075	4.12547	4.06339	4.63977	4.7515	3.90935	3.75164	3.70018	3.55803	3.65582	3.10949	3.17123	2.97599	3.443	3.57979	3.71876
RIT1	1.29208	0.000568135	0.00869639	5.28169	3.98961	5.44313	6.03626	5.70245	4.24007	5.64516	4.6692	6.11037	4.56027	5.76166	4.64833	3.99866	4.42645	4.66998	3.0951	5.66871	3.94235	2.88144	3.72552	3.37865	4.10922
RITA1	0.701532	0.00182935	0.0197904	6.73588	6.03435	6.61969	6.76855	6.18619	6.77838	7.1281	6.83741	6.97562	5.94971	6.74278	7.37239	5.43711	6.44509	6.2787	5.85392	6.22911	6.2214	6.76316	6.23132	5.20888	5.67481
RLF	0.660704	0.0344531	0.151286	7.33728	6.67657	8.13271	6.8322	7.50284	7.02204	6.28781	7.88591	7.00031	8.29741	7.53786	6.87369	7.60371	6.30283	6.29239	5.11254	6.56124	7.16606	6.48722	6.64093	7.04378	7.55504
RMND5A	0.651005	0.00591488	0.0454692	6.27724	5.62624	6.60654	5.99752	6.63809	6.44846	6.59947	5.77528	5.5183	7.1005	6.24867	5.8396	5.64716	5.93558	5.92595	4.58628	5.69298	5.54616	5.99514	6.24026	5.67348	5.01939
RNASEH1	0.833743	0.000446432	0.00744742	7.78725	6.95351	7.71251	7.05499	8.17007	8.34641	7.86264	7.28628	7.2206	8.5981	7.97209	7.64885	7.13811	7.18682	6.60974	7.82415	6.62186	6.7233	6.48202	6.6816	7.06172	7.20578
RNASEH2A	1.72309	3.37356e-06	0.000203152	5.89338	4.17029	6.43291	7.57658	5.88918	5.88918	5.4428	6.04164	6.36858	4.54344	6.04393	4.70556	3.62378	4.56893	4.39373	4.11464	4.33789	4.28659	4.26743	3.97248	3.91488	4.22261
RNF113A	0.755651	0.032783	0.145815	5.62832	4.87267	5.44092	6.62671	6.47828	5.15657	6.12034	6.52626	4.48815	5.21677	5.17766	5.0515	4.53627	5.56418	5.69116	3.16046	4.21268	4.89324	5.67392	5.50418	4.38255	5.108
RNF114	0.695673	0.000121843	0.00284931	7.4676	6.77193	7.28208	7.67997	7.07145	7.40415	7.35004	7.34775	7.76444	7.47811	8.33881	6.95917	6.93102	6.68583	6.9428	6.23887	6.64727	6.83819	6.67781	6.91659	6.73852	7.10236
RNF181	0.917365	6.06697e-07	6.10792e-05	6.32094	5.40358	6.64616	6.25882	6.52441	6.36922	6.08327	5.87145	6.17262	6.49923	6.24648	6.53774	5.28	5.57207	5.88452	4.82741	5.36387	5.59401	5.55744	5.19971	5.11574	5.641
RNF220	0.824864	0.00491765	0.0401627	7.11737	6.2925	9.1764	7.41099	7.27831	6.43213	6.59992	7.27623	7.04189	6.56735	6.92214	6.4683	6.09008	6.21322	6.17227	6.72171	5.61999	6.12544	6.51168	6.55019	6.47953	6.44091
RNF24	0.83839	1.01723e-05	0.000458293	5.71078	4.87239	5.66526	5.59372	5.57744	5.64305	5.06225	5.4692	6.73107	5.67235	5.81249	5.88094	4.87901	4.7048	4.69088	5.01671	4.86586	4.92409	4.80198	4.69369	5.04643	5.10043
RNF25	0.592798	0.00431568	0.0363531	4.6175	4.0247	5.34312	4.91151	4.4676	4.79166	5.10078	4.08716	4.86031	3.83044	4.04463	4.7378	4.48815	4.04819	3.9533	3.73336	4.65587	3.60517	4.1139	3.88271	3.76113	4.00525
RNF44	0.785451	0.000850102	0.0115838	7.2221	6.43665	6.52203	7.38662	7.76717	6.56495	7.48598	6.50188	7.81493	7.89975	6.70868	7.56897	6.74073	6.45305	6.61728	6.5417	6.58043	6.19144	5.74715	6.31455	6.775	6.40513
RNF7	1.15881	0.00706315	0.0514725	8.01568	6.85687	9.78529	8.0088	8.03288	8.38641	7.76547	7.81656	7.72548	7.81913	7.99335	6.82339	7.42373	7.02346	7.66811	3.90915	7.03396	7.43249	7.07902	7.34724	6.68873	6.9628
RNFT2	1.04766	2.69261e-06	0.000174882	4.27581	3.22815	5.08577	4.14924	4.27429	4.72926	4.16307	3.40887	4.48183	4.01803	4.54378	3.90396	3.52811	3.56436	3.14453	2.89676	3.20051	3.46817	3.15412	3.06079	3.27002	2.99413
RP11-37C7.3	0.587782	0.00362556	0.0320476	3.14265	2.55487	2.57698	3.87072	3.8654	3.00226	3.34102	2.63537	2.73446	3.3126	2.90799	3.1797	2.49568	2.93182	2.36018	2.14688	2.52013	2.82886	2.47002	3.1926	2.14286	2.45966
RP11-480A16.1	1.75559	9.0411e-05	0.00229948	7.87839	6.1228	8.30235	7.03396	7.86379	7.48109	8.61774	6.09539	8.40739	8.62705	7.42691	8.92821	6.37728	6.82002	6.24388	5.30712	7.3132	4.93563	5.05911	6.30624	7.14964	5.7159
RP11-533E19.7	0.646077	0.000303211	0.00560908	3.91536	3.26928	3.50722	4.64855	4.24806	4.02072	3.993	4.00637	3.67261	3.67676	3.72001	3.66027	2.73358	3.65294	3.17623	3.0548	3.04861	3.48935	3.33338	3.69517	3.03097	3.47778
RP11-687F6.1	0.614	0.00108046	0.0137313	2.61045	1.99645	2.52287	3.07208	2.48219	2.28717	2.84116	2.33622	2.79893	3.55951	1.9808	2.22355	2.26646	1.76582	2.07493	1.86831	2.0915	1.83536	1.70088	2.33508	1.99845	2.02768
RP4-798A10.7	1.57139	0.000199274	0.00412838	5.93487	4.36347	5.55131	5.79368	6.40699	4.95419	7.08972	5.91071	5.0281	8.12252	4.99824	5.4932	3.42553	4.50412	4.18311	5.49242	4.31782	4.47295	4.66081	4.80272	3.87489	3.90038
RPL17	0.748273	0.00862184	0.0594937	6.05529	5.30701	5.78896	6.45006	6.60469	6.05348	5.61009	5.61552	5.64663	7.03233	5.69492	6.0562	6.56495	5.95986	5.01551	4.54116	4.92326	4.87901	5.28754	4.43945	5.36933	6.09008
RPL39L	1.83111	4.1107e-07	4.81276e-05	5.41957	3.58846	6.20337	6.21069	5.0806	5.49758	6.12315	4.49458	4.80933	4.84151	6.42711	4.50778	3.29131	4.18235	3.81047	3.39446	3.12015	3.34893	3.46146	3.48879	3.89664	3.89005
RPL8	0.830218	0.00528258	0.0420838	11.0408	10.2106	10.6906	12.9149	11.1945	9.89769	10.6168	11.4429	10.8948	10.6781	11.5678	10.5096	10.5096	10.2391	10.2683	9.75414	10.3486	9.77934	10.4847	10.0275	9.93105	10.7633
RPP25	0.636476	0.000491399	0.00790513	4.69925	4.06277	5.02091	5.23669	5.22432	4.18076	4.16097	4.6968	4.63645	5.0806	4.11975	4.63525	4.11342	3.67606	4.16339	4.22806	3.84926	4.27147	3.81693	4.16307	4.18867	4.15741
RPP40	1.21716	0.000745687	0.0106077	6.73752	5.52036	5.40289	7.21164	7.43888	5.10338	7.46394	6.27391	7.36338	6.77219	7.32368	7.0213	4.67091	6.47674	5.96525	5.03969	6.02709	5.55601	5.86298	5.03443	5.21566	5.35481
RPS21	0.799114	0.000825389	0.0113513	10.7713	9.97218	10.4331	9.90581	10.9257	10.8395	11.3932	9.89769	11.3377	11.2923	10.4421	11.2458	10.0056	9.76736	9.83099	10.5096	9.93105	9.43764	9.92089	9.66932	10.2162	10.4331
RPS24	0.685791	0.00703222	0.0512681	8.48572	7.79993	7.94582	9.03125	9.12485	8.5222	7.95258	8.44423	7.27695	8.96187	8.55478	9.04266	8.1593	8.13948	7.82324	7.00206	8.10661	7.44297	8.54364	7.61877	7.68797	7.47523
RRAGC	0.683407	0.00543822	0.0428034	7.86017	7.17677	7.99656	7.38577	7.98572	7.48744	7.96423	8.27675	6.99446	8.84398	8.62705	7.03979	6.47828	7.37569	7.06983	7.58436	7.29559	7.131	7.26464	6.69674	7.35242	7.51912
RRM2	2.81545	9.71328e-05	0.00241811	7.61236	4.79691	6.26227	7.81184	7.34496	9.70773	8.42061	8.46397	5.23971	8.30631	9.63894	4.92729	3.91052	6.65014	5.51127	3.24281	4.89796	4.46512	5.69917	3.5414	4.49807	5.55267
RSRC1	1.54678	0.00013596	0.0030901	6.6978	5.15102	6.73225	5.18699	6.3616	7.12023	7.30913	5.9385	7.43203	6.9298	7.29267	6.67486	5.70486	5.43286	5.1319	2.90304	5.81179	5.04591	4.75553	5.42958	5.68605	5.60872
RTFDC1	0.598639	0.000636391	0.00943768	7.12447	6.52583	7.371	6.77939	6.69842	7.39868	7.51072	6.43091	7.23785	6.89622	7.47166	7.44987	6.49639	6.91407	6.70513	6.78104	6.43248	6.75612	6.42353	6.17183	6.34642	6.23132
RTN2	0.603048	0.000941517	0.0125226	4.09462	3.49157	4.04689	4.85032	3.57955	4.37439	4.07474	3.85272	4.48411	3.74098	3.58276	4.35972	3.27097	3.28258	3.54021	3.90998	3.47877	3.77054	3.6696	3.17892	3.61586	3.19828
RUNX3	0.953847	0.0406261	0.169039	4.77908	3.82524	3.00642	3.85441	6.4605	3.8883	4.40208	6.48656	6.01656	3.31094	6.28529	4.07977	3.99521	3.42641	3.42693	4.41181	3.78152	3.78332	3.52691	3.32713	3.59885	4.97427
RUSC1	1.41536	1.46871e-06	0.000114636	7.69476	6.2794	7.61716	7.21877	8.29294	7.19271	8.27446	7.78913	7.95521	7.47642	6.71903	8.41178	5.80027	6.86208	5.99838	6.98932	6.20788	5.94263	5.82552	6.28927	6.58833	6.29034
RYR1	0.858923	0.0259474	0.124901	3.53183	2.67291	5.04847	2.92174	2.28205	2.54423	2.57225	3.42899	4.66122	5.14522	3.48355	3.23062	2.27628	2.68254	2.37692	4.12795	2.63487	2.30852	3.07121	2.29937	2.53015	2.42131
S100A13	0.64998	1.99795e-05	0.000761359	6.22753	5.57755	5.93442	6.11751	6.7268	6.22825	6.76082	6.39867	6.02495	5.94307	6.09247	6.04837	5.55451	5.48161	5.4139	5.40328	5.92951	5.50101	5.59861	5.54857	5.77563	5.56889
S100A2	2.83371	0.000490953	0.00790513	7.50082	4.66711	6.74986	8.14602	9.60661	7.86869	7.05199	8.35859	7.72707	3.64285	11.1767	4.67986	4.04286	4.69401	3.93011	6.63959	4.34955	5.01589	4.56598	3.87435	5.16906	4.38969
S100A4	2.55944	0.000291164	0.00543709	8.20362	5.64418	7.93572	7.42205	9.38989	10.1322	10.4421	7.99714	8.68385	5.12042	5.40656	9.50622	6.54383	5.64366	5.78234	5.03969	6.00294	4.6651	4.5227	5.48425	5.63613	7.12114
S100A6	1.11587	0.000607335	0.00914393	8.3823	7.26643	8.53519	9.08919	8.76752	8.60832	9.40873	9.01321	8.0665	6.35711	7.7885	8.18868	7.38345	6.93042	7.51137	7.07755	7.68347	7.61877	7.34567	7.29559	6.76546	7.05254
SAC3D1	2.31492	4.30214e-07	4.93941e-05	7.68295	5.36803	8.84729	8.75936	8.02769	7.07873	8.3953	6.96364	8.02909	7.23273	6.5668	6.92891	5.26434	5.51676	6.05655	3.64514	6.0488	5.40174	5.03949	5.50781	5.54109	5.65862
SAE1	0.705008	0.00200546	0.0212057	4.46252	3.75751	4.61372	4.70157	4.22317	4.93124	4.63562	4.29101	3.97158	4.81505	4.80272	3.63956	3.69964	4.49962	3.90373	2.6109	3.8721	3.54114	4.18662	3.66149	3.65262	3.94729
SAP130	0.593028	0.0358674	0.15572	6.35272	5.7597	6.37942	6.12239	6.73421	6.45656	5.79453	6.80355	6.12034	6.5823	6.87659	5.65735	6.093	6.34099	6.26918	4.17359	5.79061	5.84711	4.61037	5.74042	6.28217	6.44953
SARS2	0.782535	0.0368458	0.158921	5.31274	4.5302	4.98866	4.57328	4.8615	4.83618	4.84263	4.1158	7.80821	6.64072	4.91975	5.54067	4.90315	4.42903	4.45444	3.5701	5.00835	4.23313	4.71878	4.5188	4.73203	4.73423
SCAND1	0.920048	0.00188625	0.0202459	7.49807	6.57802	8.54364	7.51658	6.68332	8.10321	8.24058	6.45281	8.49399	7.15392	6.50362	7.28902	6.66803	6.23132	6.70918	6.23551	6.62334	6.87084	6.81088	6.43863	6.24026	6.95222
SCAP	0.619987	0.000357	0.00630274	7.41102	6.79104	7.8658	7.85683	7.48207	6.92331	7.36706	6.82195	7.46094	7.36943	6.9732	7.98965	7.04189	6.48971	6.71546	6.96956	6.94546	6.69975	6.55454	6.87084	6.78347	6.83968
SCD	0.968516	3.66487e-05	0.00119451	5.24181	4.2733	4.54469	5.61999	5.86006	5.79453	5.83893	5.29603	4.9405	4.42981	5.40542	4.68818	4.12744	4.72529	4.30734	4.14493	3.93323	4.51079	4.23833	4.16659	4.35554	4.2235
SCG5	2.19902	0.00116159	0.0143927	6.10321	3.90419	8.60651	4.15554	6.85221	4.52176	3.30355	5.88003	5.97602	8.35355	6.78442	6.59849	2.55583	5.24116	4.74119	3.17695	3.90998	3.60711	5.49561	3.07055	3.91591	3.32763
SCNM1	0.806516	5.49257e-05	0.00160222	6.91818	6.11166	6.46188	6.36246	7.36664	7.35686	7.09689	6.55582	7.23418	6.58171	6.75612	7.40923	6.45433	5.67856	6.25706	6.2214	6.38787	6.16987	5.81179	6.37942	5.76508	5.99127
SCO1	0.711554	0.00888202	0.0608877	4.79922	4.08766	5.78714	5.31232	4.39906	4.26456	4.78844	4.83169	3.74648	4.38969	5.22977	5.24301	4.28037	5.27238	4.20064	3.82547	3.68334	4.61692	3.71821	3.58065	3.59756	4.10107
SCRIB	1.55808	5.05104e-06	0.000273217	9.44015	7.88207	9.04674	9.77516	9.37195	8.91575	9.25677	9.6219	10.4021	8.7501	8.69669	10.5643	7.92177	7.5679	7.5698	6.69064	8.57904	7.89975	7.73786	8.23041	8.34906	8.27446
SCYL1	0.782333	0.000235747	0.00466991	6.62339	5.84106	7.49868	7.27831	6.34741	6.64352	7.04092	6.23038	6.54693	6.20994	5.81451	6.62334	5.87951	5.59783	5.81586	5.48093	5.90699	5.89937	5.91898	5.63989	6.18938	6.08187
SDC1	1.03498	0.020693	0.107551	6.22731	5.19233	6.73107	4.774	4.5509	8.23553	6.50735	6.94236	5.68886	5.2359	7.66366	5.94349	4.58041	6.12093	5.20996	4.03391	5.14574	6.13662	5.78517	5.2065	5.13866	4.56543
SDF4	0.696335	0.00339679	0.0307317	6.86093	6.1646	7.44641	7.15985	6.33094	6.99519	6.21721	7.35242	6.61728	6.9978	6.63625	6.85597	5.8493	6.39202	6.61909	4.84079	6.21493	6.59512	6.4605	5.84323	6.1869	6.64409
SDHA	0.603753	0.00508889	0.0412673	8.97332	8.36957	8.47208	10.1481	8.3737	9.30668	9.47098	9.16374	9.09099	8.21195	9.00826	8.48673	8.38519	8.31212	8.34055	8.66608	8.52093	8.35355	8.06442	8.15658	8.44562	8.45066
SDHAF1	0.639079	0.000761318	0.0107613	6.29869	5.65961	5.97166	6.03215	6.4227	6.50897	6.67421	6.57505	6.18062	6.90104	6.19362	5.52689	5.25201	5.7525	5.96525	5.266	6.08395	6.02251	5.81378	5.28894	5.55149	5.59969
SDHAP1	0.653085	0.00148915	0.0171653	8.96662	8.31353	8.8071	9.63894	8.38306	9.38219	9.53827	9.14547	9.05501	8.16815	8.93024	8.61774	8.02769	8.14347	8.35859	9.09942	8.26709	8.36695	8.12926	8.10116	8.31743	8.32427
SEC13	0.632088	0.000830584	0.0113788	8.35341	7.72132	8.76332	8.80843	8.19141	8.05564	8.01297	9.245	8.19379	7.98425	7.98965	8.28963	7.74608	8.13431	8.06077	7.20058	7.67681	7.69475	7.44573	7.76116	7.7102	7.78281
SEC22A	0.900428	0.020611	0.107187	5.69576	4.79533	5.39752	5.42874	5.50781	5.9058	5.93201	5.41018	5.25842	6.24697	6.61175	5.25842	5.45361	5.04503	5.29333	2.00611	4.2235	4.64893	6.15289	4.71146	5.44744	4.97103
SEC61A2	1.13714	0.00302997	0.0282903	6.09897	4.96183	6.38549	5.26808	5.7659	5.88283	7.10979	5.84155	6.78442	7.38775	4.89771	5.66616	5.03989	4.80235	5.0515	6.34024	4.71654	5.07517	5.57157	5.23236	4.63008	3.15857
SEH1L	0.765452	0.00521811	0.0418372	6.75079	5.98534	7.45316	7.4353	7.54967	6.18098	5.98439	6.88999	6.29936	6.9123	6.60522	6.19755	6.93332	6.15238	6.04393	4.87746	5.96196	5.55315	5.69232	5.83852	6.41044	6.38991
SEMA3G	0.644411	0.0301149	0.138161	2.97157	2.32716	4.38329	4.49159	2.5305	2.70723	2.43963	2.29914	2.3686	2.68726	2.41745	3.39098	2.13273	2.76875	2.66909	2.45199	1.85909	2.46112	2.87728	1.93835	1.76582	2.34736
SEMA6D	0.624394	0.0408231	0.169661	4.30225	3.67786	3.5894	4.06644	4.17613	5.44092	3.9675	3.2189	5.11943	4.74752	3.89605	4.80024	3.6039	3.166	3.39633	5.38169	3.50321	3.6843	3.21093	3.2423	3.8098	3.78014
SEPHS1	0.621178	0.0262772	0.126012	7.35275	6.73157	7.63143	8.30235	7.30634	7.72632	7.29844	6.53103	7.03316	7.68582	6.48433	7.52828	6.52514	7.25216	7.25615	5.06737	6.81159	6.54414	7.2231	6.59714	6.92718	7.11176
SERPINH1	1.10188	0.0131338	0.0785646	7.01182	5.90994	8.66885	8.78033	7.58334	7.29773	6.90663	6.77358	5.37304	7.25153	6.67539	4.8078	5.99409	6.81867	6.33573	5.66682	5.60579	5.00955	5.35217	6.49772	6.1737	5.64516
SERTAD2	0.69034	0.0152393	0.0869782	7.93914	7.2488	7.33093	7.24838	8.31914	8.88675	6.63809	8.21337	7.44297	7.82956	9.27421	8.20803	6.65516	7.58263	7.25972	6.72995	7.14128	7.37908	7.3577	7.35984	7.40684	7.61582
SETDB1	0.739277	0.000235027	0.00466462	6.09188	5.3526	6.58927	6.01988	6.62444	5.81216	5.76452	5.69363	6.17754	6.34568	5.71331	6.1784	5.20606	5.32123	5.12901	6.22682	5.14341	5.40272	4.69216	5.3052	5.59543	5.50401
SEZ6L2	0.786063	0.00044703	0.00744882	4.8139	4.02783	5.26289	5.12042	4.47071	4.53907	4.52369	4.89878	5.72809	4.8135	3.7976	4.9842	3.6824	4.27034	4.33194	4.50909	3.88417	4.26482	4.06287	3.58541	3.80536	3.88193
SF3A3	1.07615	0.00432046	0.0363531	6.58311	5.50697	8.18332	7.2212	6.30283	5.19414	6.71546	5.86656	6.49092	7.36873	6.47182	6.01615	5.57953	5.34149	5.48984	3.63357	5.86627	5.47656	5.36884	6.36534	6.15238	5.79584
SF3B4	0.803386	0.00106897	0.0136256	6.80188	5.99849	7.36873	6.78377	6.54466	6.77988	6.73349	6.06748	7.05199	6.12506	6.28927	8.27446	6.12506	6.13543	5.77528	6.19624	5.58796	6.19624	6.03375	5.78007	6.07303	6.08187
SFMBT1	0.65823	0.00362834	0.0320476	7.2338	6.57557	6.9298	6.89412	7.4952	7.15558	7.77275	7.22803	6.63386	7.55904	7.10308	7.56652	7.11449	6.19991	6.72445	5.44515	6.30092	6.90239	7.39645	6.73058	6.55347	6.38787
SFN	0.694004	0.000539966	0.00840703	4.29113	3.59712	4.03527	4.68207	4.15887	4.6188	4.53022	5.10443	4.52424	3.56964	4.12158	3.56614	3.43667	3.44261	3.86559	4.05652	3.38184	3.43011	3.53835	3.63605	3.50673	3.67676
SFRP2	1.1556	0.0424417	0.174231	3.73364	2.57804	4.90833	2.65377	2.8685	8.39891	2.70369	3.08477	3.65262	2.60671	2.8162	3.64285	2.31144	2.64725	2.52123	2.97024	2.68994	2.22355	2.4755	2.4806	2.33162	3.12899
SFT2D2	0.970041	0.0152253	0.0869265	6.15294	5.1829	5.32234	5.47054	6.92284	7.02563	6.60577	7.06314	4.97036	5.32408	6.87925	5.94544	4.74471	5.67856	5.6132	3.48778	4.32629	5.69404	6.43694	4.34876	5.8955	5.60319
SGK494	1.1625	0.00666631	0.049369	6.56271	5.40021	8.65555	5.21706	5.83893	6.41564	6.34509	5.94187	7.75172	7.8404	5.51903	6.10179	5.92595	4.8078	5.42958	4.96535	6.50188	4.74802	4.61204	5.20606	5.86482	5.94057
SGPL1	1.13838	0.00162701	0.01823	6.92208	5.7837	6.80644	6.2888	6.89759	7.18159	6.54466	6.70918	7.4569	6.76385	7.53091	7.04092	5.89606	6.24697	6.23887	3.04077	6.15572	6.27811	6.10316	6.09881	5.9058	5.87272
SH3BGRL3	0.670971	0.0272404	0.129134	5.8243	5.15333	6.65616	6.17807	5.61577	5.73657	5.52119	5.88632	6.47953	5.14253	5.03989	5.98695	5.65735	5.12805	5.44238	3.17937	5.12486	5.47826	5.3052	5.00023	5.04821	6.16939
SH3D21	0.796953	9.5184e-05	0.00237906	4.94456	4.14761	5.20564	5.76625	4.59312	4.5387	4.64284	5.00891	5.30028	4.7582	4.44948	5.18215	4.25174	3.88592	4.17136	4.87192	4.02985	3.99484	4.25068	4.15308	3.67816	4.1885
SH3GLB2	0.816839	0.012846	0.0774873	3.82206	3.00522	4.16635	5.48625	3.09358	3.36625	4.82013	3.47401	4.74471	3.10315	2.65752	3.30862	2.2643	3.33338	3.41003	2.41687	3.02622	2.97946	3.07121	3.1487	3.16575	3.23626
SHARPIN	0.740652	0.00841563	0.0585246	7.11197	6.37132	7.25909	8.58753	6.81577	6.42085	6.93646	7.47728	7.10979	6.57166	6.53945	7.40186	6.92141	5.96403	5.90883	7.65545	6.43291	6.33284	6.17303	6.09478	5.84537	6.38456
SHCBP1	1.64926	3.96364e-07	4.76601e-05	3.78367	2.13441	3.49879	5.02091	3.25372	4.01131	4.20215	4.0289	2.91995	3.85272	4.23978	2.80849	1.948	2.39647	2.06128	2.07225	1.51035	2.16712	2.35069	1.84108	2.5439	2.45296
SHMT2	1.59056	1.89198e-06	0.000137427	6.96122	5.37067	7.2722	6.83669	6.59186	8.35697	6.07767	6.9082	7.20704	7.13517	6.47543	6.751	4.96931	5.57437	4.96264	6.45895	5.16477	4.8351	5.13928	5.00784	5.69951	5.89492
SIGMAR1	0.684789	0.00102906	0.0132608	5.18023	4.49544	5.41087	5.15368	5.0444	5.33061	5.51626	5.34383	4.78306	5.28472	5.04779	4.88708	4.87206	4.83863	4.72844	3.15272	4.92264	4.45405	4.32196	4.26992	4.68846	4.70556
SIN3B	0.761491	0.016594	0.0922684	6.28287	5.52138	7.0251	6.31759	5.92812	5.46938	5.72305	6.22983	6.76475	6.90786	5.02776	7.4353	5.45279	5.10586	5.362	7.18493	5.5851	5.15368	5.12167	5.27949	5.43328	5.53504
SIPA1	0.823143	0.00169971	0.018811	5.56922	4.74608	5.89997	5.93201	5.20436	4.98471	5.09627	5.9755	6.56935	4.7986	5.17627	6.0552	4.65295	4.65215	4.84238	4.27236	3.91462	4.73701	5.52032	4.59637	4.91274	5.35991
SIX1	0.58999	0.0228465	0.115015	4.81169	4.2217	4.83451	3.43185	5.55114	4.60497	4.88902	4.50303	5.46588	5.20766	4.66646	4.96235	3.98247	3.74732	3.56849	5.15833	4.14576	4.54706	3.62663	4.55323	4.18688	4.7008
SKP2	0.595174	0.00208197	0.0216948	4.57919	3.98402	4.04895	4.96593	4.18981	4.61037	4.41649	4.34735	4.57261	4.93124	5.2359	4.47328	4.06767	4.22159	4.00316	2.94406	4.15076	4.23694	3.80536	4.11428	4.03391	4.26245
SLC10A3	0.674388	0.0103122	0.0664194	6.03629	5.3619	6.22187	7.16499	6.01162	7.25972	5.10787	6.42885	5.53692	5.55451	5.76679	5.30978	5.50712	5.30829	5.40397	5.30904	4.76655	5.72417	5.43903	5.08461	5.59969	5.47656
SLC12A8	0.737784	0.0433019	0.176496	5.52158	4.7838	4.93221	4.45833	6.09173	7.25387	5.2749	6.98932	5.17134	4.9215	4.36435	5.75823	5.34104	4.93621	5.28082	3.61368	4.94601	5.10703	3.91732	4.64147	5.05684	4.99751
SLC16A1	0.930747	0.00367019	0.0322861	4.78483	3.85408	4.52138	4.28073	5.38101	5.74715	4.57261	4.53447	3.80139	5.73178	5.89384	3.38391	3.6585	4.05424	4.10194	3.86763	3.31297	3.72091	4.72274	3.70018	3.74245	3.65923
SLC25A38	0.895125	0.00671803	0.0496075	8.65291	7.75778	10.7405	9.08272	8.52093	7.697	7.88294	8.2217	7.95635	9.43475	7.74488	9.24732	7.56382	7.61877	7.61582	7.72632	7.89437	7.61408	7.65161	7.86264	8.14923	7.88118
SLC25A39	0.740692	0.00941642	0.063027	6.15908	5.41839	6.88098	7.64263	5.95603	6.07303	6.35918	5.77172	5.81505	5.89188	5.50436	5.69591	5.69045	5.06144	5.87869	4.01313	5.44027	5.27543	5.59039	5.5754	5.77961	5.87905
SLC25A5	1.1483	0.00957999	0.0635903	9.97537	8.82707	8.32563	11.414	9.73039	10.3026	11.1191	10.4738	8.99661	9.10082	11.5341	8.75658	8.65154	10.3268	9.60661	8.52567	8.32947	8.31343	8.66132	8.43434	8.13672	9.28475
SLC27A3	0.919016	0.000550303	0.00851332	5.4015	4.48248	6.84812	5.35462	5.45513	5.02473	5.8941	4.68648	5.06737	5.21706	4.67639	5.791	4.28411	4.46095	4.34648	4.06266	4.96164	4.38195	4.28858	4.59562	4.24456	5.1983
SLC29A3	0.597015	0.000495332	0.00791997	5.85867	5.26166	5.7948	5.33767	5.85649	5.78082	5.87215	6.16271	5.46078	5.94154	5.8047	6.57505	5.28472	5.39335	5.30978	5.31336	4.81093	5.50981	4.83423	5.22156	5.16874	5.77007
SLC2A1	1.22684	0.00067898	0.00987991	5.41631	4.18947	6.31721	5.29333	5.64819	6.33898	5.34356	6.00252	5.70044	3.93323	5.81538	3.77028	3.96812	4.85126	4.72151	3.32864	4.08077	4.67986	4.56796	4.09537	3.66322	3.93796
SLC2A4RG	0.808525	0.000662249	0.0097159	5.05338	4.24485	6.16474	5.47718	4.71475	4.67986	5.74803	4.43698	5.04847	5.0022	4.06601	5.19555	4.11628	4.03929	4.17103	4.40033	4.64329	4.17854	4.1689	4.04713	4.4596	4.22414
SLC35F5	0.887493	0.0072484	0.0525428	3.5491	2.66161	3.43068	4.1986	3.60265	3.78862	2.26028	2.70937	2.96353	2.84443	4.15066	5.54218	3.08158	2.53084	2.6404	2.44039	2.56175	3.09928	2.24852	2.2884	2.93988	2.78503
SLC38A1	1.08424	0.000822517	0.0113351	9.17934	8.0951	7.81116	8.88675	8.97786	9.35967	9.56911	8.80543	9.03489	9.07901	10.3486	9.92089	7.68103	8.6251	8.19254	7.7694	8.58251	7.81184	7.69617	7.57785	7.57977	9.43475
SLC39A13	0.613272	0.0027697	0.0266142	4.25037	3.6371	4.79189	3.84576	3.83662	4.71509	4.44228	4.11364	4.99898	4.0486	4.03749	3.67337	4.18129	3.97564	3.29948	3.20702	3.15645	3.85196	3.62663	3.74193	3.40625	3.92435
SLC39A4	2.30549	1.18022e-06	9.72368e-05	7.78458	5.47909	8.03406	9.8353	8.23041	7.48207	6.36334	8.32817	8.55337	6.73957	6.50675	7.77275	5.08164	5.20327	5.45569	6.51733	5.50401	5.57052	5.60527	4.97709	5.33502	5.54109
SLC39A7	1.09507	0.000254767	0.00493155	5.40738	4.31231	5.35418	6.44509	4.66122	5.36096	5.72651	5.2686	5.33981	5.11612	5.47593	5.32535	4.31226	5.42781	4.4676	2.89396	3.62433	4.55759	4.55855	4.27942	4.86514	4.1364
SLC41A3	0.619994	0.026512	0.126777	6.8706	6.2506	5.7168	5.77434	7.15129	6.71249	6.77007	8.28366	6.80644	7.02204	7.14419	7.32465	6.41628	6.18969	6.45044	5.08951	6.06387	6.53103	6.41805	6.48013	6.48554	6.3815
SLC43A3	1.03279	2.2356e-05	0.000828848	4.95449	3.92169	4.68915	4.89955	4.74179	4.66316	4.35441	5.23181	4.78621	5.01167	6.34697	4.82013	3.52014	3.78468	4.16796	4.36674	3.76444	3.65011	4.19166	3.83205	3.72037	4.21878
SLC48A1	0.607159	0.000822723	0.0113351	5.2104	4.60324	4.85214	4.55128	5.14119	5.00284	5.51251	5.25597	5.24523	5.49704	5.9469	5.09892	4.64206	4.25685	4.86514	4.99879	4.37474	4.67127	4.5894	4.16635	4.45743	5.0104
SLC4A11	2.04254	0.000659578	0.0097007	7.94493	5.90239	7.84997	6.82195	8.18769	8.00359	8.24727	7.74696	10.1436	5.41709	7.51072	9.52043	7.25463	5.21389	6.64552	3.26762	6.63059	5.58706	5.68886	6.10417	5.76016	6.87139
SLC4A1AP	0.812725	0.0281743	0.132328	6.21459	5.40186	6.51669	5.80027	5.6926	6.8432	5.74042	5.94407	6.49202	6.57293	6.31934	6.22432	5.07195	5.8163	5.86934	2.45554	6.22369	5.51421	5.55498	6.0701	5.74082	5.70168
SLC4A2	1.14914	0.000312999	0.00573649	5.99667	4.84753	6.77899	7.78913	5.12263	5.37121	5.79257	6.45943	6.05092	5.355	5.83337	5.41345	4.12645	4.88416	5.10501	4.38311	5.11463	5.0515	5.02091	4.87783	4.83863	5.07309
SLC4A3	1.36768	2.73996e-06	0.000176945	5.73409	4.36641	6.90135	5.52119	5.63575	5.73737	6.02759	5.10443	6.46188	5.04847	5.03845	5.86442	4.3167	4.25047	4.54852	4.28149	4.778	4.77646	4.333	3.70849	4.01803	4.65295
SLC52A2	1.70823	5.21384e-06	0.000278635	6.73259	5.02436	7.00542	9.04266	6.87981	6.07061	6.50434	7.05753	6.38746	5.93107	6.54352	5.90349	5.24704	5.11761	4.81958	5.46349	4.96931	4.83117	4.97291	4.93698	4.92919	4.95637
SLC5A3	0.592929	0.0290346	0.134873	6.39018	5.79725	6.20389	6.38057	5.64516	6.38692	6.36278	5.99952	6.01764	7.60987	7.06172	6.23375	5.85392	6.14217	6.0488	4.15308	5.97056	5.84754	6.34395	6.13724	5.94602	5.52927
SLC5A6	0.723329	0.000462129	0.00760078	6.92839	6.20506	7.68522	6.3958	6.70742	6.79643	6.98288	6.70112	7.12912	6.86323	6.71297	7.30967	6.46105	6.18335	5.85987	7.16465	6.12506	5.6665	6.43401	5.91411	6.05716	6.1848
SLC6A10P	1.31397	0.000119968	0.00283526	6.44769	5.13372	5.99355	7.44915	6.13496	5.83916	6.98874	7.3106	5.71218	6.74073	6.71509	5.5927	4.51991	5.52189	4.05792	6.40882	5.22096	4.89246	5.28894	5.24227	5.36387	4.82013
SLC6A8	1.44807	3.23767e-05	0.00108994	6.63389	5.18582	6.50962	7.9685	6.48656	6.07906	6.79387	7.65921	5.3647	6.69975	7.0251	5.7525	5.69164	5.39931	4.89324	6.08217	4.96431	5.16906	5.14379	5.09627	4.82013	4.59827
SLC9A2	1.69992	0.000412417	0.0070099	4.70997	3.01006	3.91391	3.53153	4.40272	4.33397	3.98849	4.83437	5.17134	6.45006	3.00939	7.46394	3.27321	2.91318	2.99138	2.92106	3.2423	2.88603	2.91072	3.17568	2.89937	2.88761
SLC9A6	1.03723	0.0223153	0.113176	7.05414	6.01691	6.05716	7.83476	6.89393	7.39412	6.00683	8.50101	6.76855	6.89759	7.40365	6.78377	5.36731	6.78442	6.56974	2.85913	6.39986	6.3435	6.81626	6.14964	6.09741	6.78179
SLCO6A1	1.22734	0.000355045	0.00628069	3.59654	2.3692	4.68109	3.95021	2.29037	2.19764	4.59048	3.11567	2.98507	3.928	3.96041	4.26641	2.4854	2.02047	2.1184	2.08315	2.01304	2.55685	2.51442	2.61336	2.22588	3.06101
SLIRP	0.900949	0.00187092	0.0201665	9.38909	8.48814	8.38306	8.67079	9.34485	9.81265	10.0909	10.0974	10.4913	8.63977	8.90185	9.45834	7.75841	8.6906	8.67444	9.15784	8.52788	8.73255	8.58041	8.21337	7.90429	8.64166
SLMO1	1.73633	5.3242e-05	0.00157653	5.19375	3.45743	6.13244	4.36612	6.38391	4.74281	4.33713	6.16939	5.31272	6.40513	4.15536	3.93252	3.90778	3.26918	3.31801	2.68994	3.00666	2.75733	3.32295	3.8883	4.25944	4.15465
SLMO2	0.828869	0.0415377	0.171708	5.98775	5.15889	5.20468	6.69548	5.7108	6.60654	5.85358	6.56124	5.65062	5.1505	7.31264	5.13145	4.89324	6.47797	6.08803	3.29387	4.53734	5.35014	6.66053	4.35642	4.85865	5.07266
SMAD6	0.62461	0.000176349	0.00378084	4.10402	3.47941	4.31629	3.56075	4.18833	4.43415	4.68236	3.92174	4.21807	4.05723	3.44249	4.21878	3.47982	3.4391	3.6682	3.36227	3.42899	3.34367	3.22104	3.44442	3.83827	3.56831
SMAGP	1.19	0.00127314	0.015319	4.46971	3.27971	5.49192	4.94121	3.6465	5.00418	3.37852	4.94173	4.26052	5.32083	3.91875	3.79296	3.06313	2.63793	3.13074	5.03969	2.83413	3.53355	3.62663	2.33255	2.95609	3.64269
SMARCAL1	0.759151	0.0189011	0.100798	5.98916	5.23001	5.73692	6.19662	6.31934	5.32408	7.29112	5.93003	6.00062	5.65826	5.60675	5.82785	5.71477	5.16656	5.56177	2.93906	5.75202	5.46843	5.23797	5.20258	5.61836	5.63857
SMARCC1	0.772458	0.000108539	0.00261466	6.25866	5.4862	6.39671	6.84413	6.28683	5.53089	6.62186	6.12506	5.80867	6.34869	6.17067	6.45305	5.48093	5.97733	5.55778	4.75638	5.81283	5.28251	5.29502	5.3465	5.68474	5.66797
SMC4	1.41847	5.48708e-05	0.00160222	6.70729	5.28882	7.54098	6.775	6.43914	6.93414	7.09985	6.67172	5.66871	6.7268	7.83553	5.38101	4.79294	5.7659	5.15097	3.99807	5.54857	5.62635	5.78234	5.1103	5.54218	5.57052
SMG5	0.753554	0.000329239	0.00594232	6.78354	6.02999	7.15558	7.10076	6.9559	6.62276	7.3293	6.61768	6.50962	6.85221	6.15327	6.53835	5.78007	5.78272	6.10804	6.91443	6.01022	6.27524	5.26546	6.30989	5.98995	5.86386
SMIM17	1.22387	0.0019942	0.0210992	3.77767	2.5538	4.0486	3.36141	3.67843	2.69171	2.21047	5.08885	3.98127	5.10113	2.56521	5.04961	2.49568	3.01406	2.74275	2.36362	3.42841	2.40051	1.93189	2.1623	2.59279	2.40596
SMUG1	0.723875	0.00173993	0.0191134	5.10032	4.37645	6.13543	5.19662	5.08616	5.1154	4.63941	4.73758	5.13107	5.52834	5.05175	4.38145	4.28495	4.71431	4.80198	3.42216	3.99033	4.23642	4.63114	4.79781	4.23978	4.64557
SMYD3	0.720398	0.0354923	0.15462	5.73892	5.01852	5.50575	6.37323	6.08054	6.01764	5.33439	5.04684	5.5933	5.82097	6.59714	5.01939	5.33295	5.64467	5.6665	2.94537	5.82058	5.4139	5.1475	5.6014	4.72844	3.88389
SNHG12	0.729739	0.00649926	0.0483937	7.7439	7.01416	7.92396	8.63797	8.20514	7.43055	7.76444	7.51072	7.17576	8.15516	7.05549	7.57977	7.59666	6.29988	6.46105	8.02999	7.06517	6.31137	6.45433	7.11917	7.70239	7.10156
SNORA5B	1.34176	5.50099e-05	0.00160222	6.30598	4.96423	7.20058	8.26876	6.19948	5.58088	6.37403	6.11333	6.18005	5.81179	5.60004	5.73088	5.27477	4.89878	5.35533	4.71103	5.29956	4.93088	4.9448	4.71311	4.95953	4.55447
SNRNP25	0.682984	0.0164173	0.0916446	6.83865	6.15567	5.23844	7.7536	6.75255	8.1513	7.42205	6.34304	6.35918	6.93503	7.07422	6.35711	5.83996	6.29261	6.52777	5.91332	6.11221	6.19807	6.40394	6.3616	5.98105	5.92615
SNRPA	1.24287	0.000624773	0.00932756	7.19179	5.94892	7.60574	7.17143	6.90135	7.17668	7.16276	5.99644	7.69241	8.48049	5.94971	7.78085	4.76408	6.15572	5.97363	5.00418	6.03747	6.08157	5.89115	6.00878	6.39376	7.17882
SNRPB	1.77818	2.00202e-09	1.31956e-06	9.07872	7.30054	9.05096	9.86983	8.92821	8.87968	8.83517	8.69408	9.45507	9.19888	8.83099	9.04438	7.77509	7.73516	7.5039	6.48407	7.16606	7.0749	6.86723	7.29909	7.18231	7.91759
SNRPD1	0.662259	0.00158709	0.0179554	6.59577	5.93351	6.34741	7.15296	7.22385	6.94613	6.42931	6.93414	6.34905	6.53633	6.43091	5.6076	5.61999	6.41943	6.29536	5.98823	5.51091	5.96245	6.2888	5.50021	5.8066	5.94307
SNRPE	0.688736	0.000360206	0.00635305	7.70982	7.02108	7.80244	7.5254	8.02909	8.69408	7.24148	7.371	7.54532	7.66725	7.44297	7.77917	6.733	6.84092	7.19845	7.05926	7.14964	6.56495	7.50914	6.98468	7.37384	6.79695
SNRPF	0.854355	5.94031e-05	0.00170232	8.49453	7.64017	8.91916	7.7931	9.06939	9.00826	8.25753	8.2206	8.86666	8.71375	7.81184	8.285	7.61408	7.65161	7.43813	8.12926	7.86021	7.40107	7.34072	7.7931	7.71794	7.45561
SNX5	0.704708	0.00026466	0.00508079	6.30953	5.60482	6.15792	5.73921	6.30047	6.54352	5.5927	6.18186	6.81815	6.75976	6.48381	6.51789	5.57622	5.88232	5.88504	4.90505	5.47326	5.53987	5.63517	5.54109	5.60504	6.00516
SNX6	0.613631	0.0252626	0.123002	8.20743	7.5938	7.79946	8.62325	8.45191	8.39011	7.85363	8.97227	7.88759	7.65746	8.29632	8.14231	7.22902	8.30146	8.17988	5.81852	7.34567	7.97918	7.87172	7.28306	7.87265	8.05684
SORT1	0.688217	0.00415662	0.0353591	4.9965	4.30828	4.98785	3.99667	4.47776	5.31633	5.14414	5.16448	4.84518	5.46843	6.07215	4.49196	4.17073	4.5182	4.58503	3.41818	4.47392	4.75183	4.57414	4.09566	4.1539	4.34121
SOX11	0.74507	0.0272303	0.129121	3.2862	2.54113	2.62772	2.2465	4.19827	4.20558	2.43258	2.57334	4.24552	2.7096	2.54892	5.07397	2.45943	2.55943	2.3281	3.01299	2.70545	2.74228	2.38527	2.5363	2.37875	2.30331
SOX12	1.24332	5.11379e-05	0.0015295	5.92025	4.67694	5.57823	5.66896	5.51868	5.63829	6.24447	4.84452	6.38322	6.36246	5.55778	7.40591	4.94139	4.51104	4.67572	3.69617	4.85553	4.38724	4.84724	4.93575	4.95305	4.96625
SOX17	1.10909	0.0135103	0.0801434	7.50631	6.39722	8.07266	8.45578	7.10888	7.46778	7.8466	6.11503	7.60816	7.7885	7.44205	7.15762	6.04211	7.77821	7.78085	3.50956	6.70447	6.2842	7.27358	5.78627	6.25773	6.55517
SOX4	1.07114	9.44055e-05	0.0023763	7.5301	6.45895	7.5182	6.88813	8.07161	7.88759	7.96537	6.4258	8.63048	7.2389	7.0849	7.58997	6.14682	6.39106	6.44572	5.81668	6.73225	6.71668	6.48554	7.01065	6.59714	6.24697
SPAG4	1.21298	0.00259146	0.0253255	5.58593	4.37295	7.24148	6.16474	4.90339	5.83548	5.93046	6.96634	5.33715	4.34251	5.03085	4.10689	4.56869	4.0751	4.20356	5.41992	4.31359	4.83819	4.5182	4.66081	3.80377	3.32763
SPAG5	1.74334	4.43864e-07	4.9939e-05	5.59224	3.84891	6.38858	5.77134	4.62475	5.60631	5.83852	5.74162	6.34256	5.83159	5.59297	4.18419	3.60711	3.8721	4.10363	3.06921	3.53801	3.53355	4.04444	4.19808	4.28728	4.23567
SPATC1L	0.708981	0.0107327	0.0682732	3.10676	2.39777	3.96715	4.7527	2.6075	2.58389	2.47002	2.54846	3.41059	3.12121	3.27097	2.33508	2.19197	2.39022	2.6118	2.67496	2.03851	2.64697	2.15476	2.97749	2.15094	2.14013
SPATS2	0.636659	0.00607187	0.0462168	4.94501	4.30835	5.11761	4.31589	5.07124	4.94631	4.21974	4.24521	5.86763	6.03215	5.09862	4.53568	4.44732	4.79294	4.43769	4.11428	4.2178	4.46792	4.23145	4.05394	4.17256	4.14758
SPC25	1.46535	0.000633758	0.00941432	3.86022	2.39487	3.2309	4.32044	2.98846	5.02473	5.90125	2.98383	2.82741	3.20912	5.29119	2.82486	2.45218	2.83956	2.36411	2.73492	2.1139	2.66282	1.85616	2.0059	2.06411	2.85509
SPDL1	1.52635	1.00015e-05	0.000451742	6.45379	4.92745	6.12697	7.2389	6.4227	5.65933	5.69492	7.25081	6.38692	6.36534	6.80452	6.5875	4.82412	5.70571	5.07819	3.53128	4.49847	4.27377	5.02188	5.46726	5.69998	5.17377
SPINK5	1.72939	0.00677051	0.0498708	5.99069	4.2613	6.07446	4.65661	4.53022	4.79118	6.41943	4.1387	8.53382	6.4932	4.97598	9.29331	4.26351	3.77235	4.5166	6.13326	5.25597	4.146	3.43647	3.77103	3.48879	3.82907
SPINT1	0.624814	0.0148009	0.0854078	5.99783	5.37302	5.99838	7.41011	5.67768	5.86934	5.40254	6.68044	6.08452	5.60579	5.57858	5.67094	5.49677	5.66871	6.14491	5.68474	5.15368	4.94933	5.19248	4.53022	5.12741	5.78189
SPINT2	1.17131	0.00066908	0.00977582	9.91281	8.7415	9.65745	10.3861	9.11703	10.421	9.8798	10.3691	9.4048	11.0927	10.0056	8.79458	8.57268	9.7998	9.64576	7.73603	8.30235	8.91575	9.43475	8.28131	8.13431	8.59231
SPNS1	0.693523	0.0141358	0.0827773	5.53875	4.84523	7.14552	6.11704	5.2987	6.01919	4.54606	4.83643	5.61836	5.2625	5.14274	5.401	4.73811	4.54378	5.04741	5.06026	3.80497	5.16131	5.14341	4.69011	5.2012	5.06176
SPOCK2	0.891534	0.0028678	0.0272102	6.65367	5.76214	7.26577	5.62333	6.82867	6.95033	6.47488	6.51077	7.30441	6.93646	5.29562	7.34647	5.81586	5.45161	5.29301	6.99201	5.92812	5.51343	5.33061	5.35852	5.7659	6.17227
SPP1	1.36244	0.0141118	0.0826915	5.65433	4.29189	3.31459	5.2012	7.44297	7.49353	5.0936	4.16758	5.79552	6.75345	6.86657	4.41432	3.64084	4.38329	4.84687	2.20862	4.5113	4.43139	5.35655	4.53627	5.25764	3.74617
SQLE	0.631587	0.0199105	0.10446	5.27873	4.64714	4.68173	6.07698	5.40542	4.79781	5.7168	5.50436	4.82584	5.12439	6.41943	4.23451	4.27764	5.52596	4.64734	3.78283	4.58183	4.90833	5.06785	4.71954	4.67858	4.28149
SRD5A1	1.39481	0.000117729	0.00278605	6.21796	4.82315	4.84329	7.27885	6.32301	6.19717	6.50962	5.47874	6.07479	6.48853	6.43458	6.55099	4.65336	5.62635	5.34848	2.9104	4.7971	4.8991	4.93874	4.87021	5.18924	4.99848
SRPX2	0.732416	0.000407464	0.00693898	2.9059	2.17348	3.65828	2.44934	2.62251	3.69699	2.78526	3.19087	2.26973	2.91555	3.13109	2.33934	2.23316	2.45114	2.59279	2.09544	2.26868	1.92104	2.13401	2.00996	2.0739	1.95469
SS18L1	1.75297	0.000770847	0.0108101	9.00491	7.25193	10.2232	8.63048	8.68065	8.73399	9.02941	8.32947	9.85534	9.51676	8.29451	8.75527	7.85569	7.17882	7.51376	3.6991	8.38159	7.35686	6.73225	8.09143	8.33881	7.371
SS18L2	0.818489	0.000829288	0.0113705	7.74665	6.92816	8.87968	7.05926	7.98054	6.82973	7.42846	8.30009	7.45561	7.9287	7.40684	8.19759	6.58459	6.90385	6.90135	7.17825	7.11176	6.64552	6.90453	6.62186	6.94833	7.48158
SSB	0.783713	0.00523983	0.041947	7.89741	7.11369	8.35187	8.58251	7.5476	7.32465	8.96799	6.97844	7.80662	8.36438	7.371	7.67901	7.29559	7.40591	7.07902	5.85168	7.21736	7.28902	7.52734	7.74782	7.05382	6.66938
SSBP1	0.669065	0.000562643	0.00864106	6.20917	5.54011	5.88094	6.40069	6.25296	6.89915	6.40443	6.07394	6.18938	5.7159	6.15959	6.11472	5.75696	5.96292	5.7168	4.54706	5.36574	5.55549	5.64819	5.53304	5.35613	5.95872
SSBP3	0.625553	0.00400145	0.0343511	4.99494	4.36939	5.75968	4.93563	5.04311	4.72494	4.64734	5.40978	5.29301	4.79294	4.27034	5.07266	4.2329	4.42322	4.30199	3.16644	4.73758	4.72596	4.62629	4.62302	4.51562	4.34088
SST	2.02574	0.000129446	0.0029801	4.86221	2.83647	6.80029	4.33996	4.49741	6.24365	6.14312	4.36851	4.58132	6.03626	3.30744	2.30415	2.78871	2.66364	2.98583	3.26385	2.2884	3.13825	3.07121	2.73025	2.58341	2.8512
ST6GALNAC5	0.830918	0.0208548	0.108033	4.40411	3.5732	3.57134	5.22825	4.52808	5.2302	5.69636	5.04503	3.65404	3.73279	3.63037	3.72465	2.94237	4.70899	4.49458	2.56753	3.44531	4.27554	3.83169	3.55378	3.05176	2.8604
STAG3L1	0.736214	0.0347087	0.152175	5.50118	4.76497	6.0645	5.48581	6.25336	4.71339	6.22911	4.26265	4.40632	5.50575	5.61009	6.48083	4.90315	4.72735	4.40882	6.68805	4.54778	4.41181	3.92003	4.62426	5.01402	4.40441
STARD10	0.590594	0.0327936	0.145826	4.85624	4.26565	4.8622	6.35007	5.06891	4.94913	4.76472	4.86586	4.99898	4.01059	4.19599	4.49599	3.70915	4.3301	4.392	3.24899	4.7937	4.07781	5.33439	4.28466	3.97202	4.51369
STAT1	0.970179	0.0483331	0.190085	8.42326	7.45308	9.20159	9.04894	7.71251	7.52307	10.0675	7.65461	9.86227	6.9559	7.2722	8.93401	7.95406	7.1258	7.05382	5.34975	9.05096	7.40967	8.01739	7.10706	6.63128	8.83099
STC2	1.2427	0.000146013	0.00327672	5.81849	4.57578	5.39831	5.79198	5.83263	5.9385	5.31575	6.59338	5.63763	4.54649	7.51658	5.61364	4.82584	4.65693	4.50535	5.34069	4.96235	4.6675	4.47873	4.17043	4.08842	4.06161
STIL	1.70968	3.83374e-05	0.00123597	7.11779	5.40811	6.62942	7.08039	8.03406	6.80617	7.03816	8.77055	6.94188	6.70172	7.8492	5.32632	5.70328	6.17227	5.6553	4.22376	5.05655	4.82905	5.84155	5.74972	5.17484	5.67481
STK25	0.806	0.00622328	0.0470686	6.50483	5.69883	8.05684	6.31648	6.5258	6.74278	6.77939	5.13006	6.43248	5.90796	6.83252	6.32401	5.58125	5.85676	5.87364	4.99521	5.4974	5.15789	6.41863	5.32875	6.05196	6.22682
STK31	0.902707	0.0364231	0.157556	4.92197	4.01926	7.55504	3.32689	4.40632	4.40137	4.42438	5.22318	5.56868	5.45245	3.5467	5.31464	3.21546	4.21247	4.47125	3.38015	4.36647	3.96378	3.21039	4.8615	4.8099	3.7012
STMN1	1.59407	1.10834e-08	4.00593e-06	5.33614	3.74208	5.4866	4.87969	4.82979	5.26755	5.41548	5.0162	6.52514	4.9776	5.42781	5.53558	3.63098	4.1058	3.69964	3.20495	3.54953	3.86709	3.9177	3.72278	3.6506	4.07169
STMN3	0.592151	0.0293807	0.136036	4.89621	4.30406	4.32345	4.15108	4.98866	4.813	4.97821	4.77002	6.56595	4.97357	3.66877	5.72945	4.23719	3.9386	4.38632	4.20858	4.2175	4.257	4.21493	4.33954	4.62389	4.61709
STOML2	0.845408	0.0196444	0.103491	7.09759	6.25218	7.25689	7.88502	6.81867	7.63717	8.1099	6.77592	6.26773	7.20962	7.61643	5.39857	6.22505	6.775	7.06809	4.54344	6.81474	6.44091	6.25296	6.62034	5.31303	6.4683
STON2	0.708002	0.019581	0.103377	3.94658	3.23857	3.01615	3.74617	3.63935	3.32733	3.75552	3.28546	5.00482	3.17871	5.1254	5.38686	3.62572	3.17177	2.77983	3.5701	3.61429	2.95012	3.15827	3.04838	3.29344	3.17382
STX10	1.2903	7.39113e-07	6.96162e-05	6.45182	5.16152	6.9607	6.90547	6.39169	6.02294	6.28529	5.90157	7.13023	6.47004	6.05861	6.39169	5.51312	5.67235	5.42139	4.20356	5.45182	5.16477	4.8731	5.09824	5.24948	4.96737
STX19	0.901141	0.0306837	0.140156	4.22181	3.32067	3.15144	5.1475	3.31594	3.52549	5.77434	6.00537	4.3698	2.92014	3.04415	4.96396	3.07658	3.2256	3.88484	2.41537	4.37583	3.32039	3.71652	3.21255	3.2192	2.75984
STX1A	0.785866	0.00840191	0.0584521	5.79131	5.00544	5.63959	4.93201	5.15929	5.78972	5.70614	6.37657	7.4623	5.69802	4.90833	6.24112	5.64597	4.72356	4.69801	5.54492	4.96206	4.78705	4.16152	5.20293	5.47098	4.85744
STX6	0.671107	0.00108736	0.0137531	5.49303	4.82193	5.57655	5.28212	6.1848	5.9755	4.86344	5.65285	5.09082	5.50737	5.5851	5.21177	4.95726	5.26466	5.02608	3.83949	4.50166	4.91495	5.11463	4.974	4.83618	4.79035
STXBP6	0.66282	0.0220158	0.112101	4.08635	3.42353	2.72487	4.71737	3.64314	4.86177	4.99329	3.79233	3.95464	2.88454	4.86918	4.42233	3.14395	3.79492	3.62344	3.50158	3.52909	3.36305	3.64084	3.218	2.71822	3.70216
SUGCT	0.635884	0.0013631	0.0161052	3.30532	2.66944	3.09107	2.96067	2.65897	4.28709	3.74068	3.3215	3.37741	3.35361	3.17989	3.08233	2.97718	2.48822	2.41787	2.95179	2.87116	2.06014	2.49005	2.55709	2.8618	3.01909
SULT4A1	0.901398	0.000339535	0.0060822	5.24674	4.34534	4.90856	5.32322	5.61577	4.80724	4.29963	6.25503	5.89229	5.35093	4.70724	5.30748	3.96406	4.50303	4.17646	5.03969	3.89796	3.97957	4.40906	4.38292	4.70327	4.39739
SUSD4	1.51443	0.000117611	0.00278605	4.90263	3.3882	4.37216	4.21878	5.22883	5.2523	4.38329	5.46621	4.82276	3.33141	7.27499	4.67557	3.41026	3.74212	3.62907	3.00713	3.59687	3.19755	3.39567	2.96089	3.52708	3.41535
SUV39H1	0.624047	0.0158886	0.089451	6.36796	5.74391	6.82713	5.97102	5.93343	6.51344	6.44953	6.47674	7.29909	5.95913	5.84368	6.40638	4.70423	5.44163	5.43488	7.1956	5.67793	5.83418	5.73178	5.60527	5.64974	6.16386
SV2A	0.927259	0.000849052	0.0115838	4.65852	3.73126	5.64935	3.81067	4.08707	4.83047	3.26403	4.82276	4.92555	5.06042	4.84263	5.29229	4.08139	4.12629	3.71561	3.5701	3.17363	3.79846	3.74212	3.54876	3.48769	4.0686
SYNDIG1	1.39772	0.000559536	0.00861376	6.36074	4.96302	6.02405	5.43751	6.93414	7.87942	5.83082	6.22053	6.18529	7.80909	4.5348	6.75177	5.45959	5.44866	5.19302	3.89759	4.74776	4.49962	5.05911	4.59048	5.37388	5.36047
SYNGR3	2.05642	1.66281e-05	0.000672531	5.37593	3.31951	4.23493	5.33964	5.27302	6.73107	3.9665	7.32223	5.85496	4.2526	6.08217	4.70217	3.25146	3.19828	3.57861	2.2632	2.95852	3.53355	3.45423	3.13139	3.4785	4.34735
SYT11	1.37613	0.00232938	0.0235398	4.89531	3.51918	4.98274	3.03987	4.57207	6.20337	3.60673	4.8268	5.00694	4.74083	7.3116	4.66215	3.27543	3.16341	3.51951	4.27794	3.38757	3.17196	4.4781	2.86208	2.84218	4.21365
SYT17	0.866868	0.0367037	0.158462	7.77139	6.90452	6.97643	6.60125	8.40898	7.46623	9.19445	6.81016	8.71619	7.5152	7.62202	8.40301	6.44613	6.05487	6.63809	9.51676	7.08914	6.65491	6.514	6.28181	6.77899	7.07054
TACC3	2.4305	1.78694e-06	0.000131952	6.26969	3.83919	6.951	7.6818	5.72217	6.36416	7.15296	8.19086	5.21921	5.47406	5.35784	4.58283	3.70672	4.32085	3.82014	3.99074	4.16125	3.73785	3.62663	3.72001	3.02246	4.28526
TAF1D	0.843667	0.000470976	0.00768906	8.25665	7.41299	8.31087	8.42221	9.35336	7.43813	8.08075	8.40149	8.09978	8.87968	7.83769	7.74257	7.93155	7.57977	6.87139	7.47101	7.68103	7.25216	7.88174	7.253	7.12443	7.08377
TAF4	0.710561	0.00053272	0.00835406	5.75134	5.04078	5.81249	5.32535	5.72459	5.57371	5.95642	5.57687	6.13685	5.80573	5.53647	6.06494	4.94346	5.09731	5.15807	3.81101	5.55451	5.1872	4.95772	5.25434	5.55817	4.88601
TAF5	0.641962	0.0351608	0.153664	5.48445	4.84248	5.59237	5.35533	5.97056	5.86833	5.13974	4.83914	5.18545	6.48433	6.19301	4.21621	4.27094	4.80676	4.25322	4.62977	5.04715	4.72327	5.82097	4.90681	6.01942	3.94655
TAF6	0.638748	0.0083883	0.0583802	6.85336	6.21462	6.5417	7.11597	6.31818	6.82929	7.12912	7.12984	7.32223	6.55935	6.39042	7.19754	6.12812	6.35292	5.92055	4.58503	6.5823	6.44238	6.51226	6.44153	6.5638	6.61728
TARBP2	0.707966	0.00470953	0.0387654	6.30807	5.60011	7.05683	6.32771	6.04302	6.52203	6.08054	5.56929	7.16887	7.11917	5.58055	5.61274	5.56453	5.81951	5.65562	6.24447	5.14233	5.13817	5.44966	5.5498	6.03215	5.40484
TARS	0.938966	0.000242457	0.0047677	8.09574	7.15677	7.63892	9.17186	7.6818	9.11957	7.82124	7.42773	7.77275	8.31212	8.3858	7.62558	7.28902	7.42846	7.26464	7.44205	7.12271	7.17668	7.14813	6.89537	6.47343	7.32723
TATDN1	1.19034	0.00501785	0.040828	6.97117	5.78083	6.61383	8.50243	7.25689	6.31045	7.1956	7.29721	6.0811	6.53234	8.14923	5.7726	5.08461	6.56323	6.4657	3.98817	6.5571	5.52032	7.02204	5.15807	5.34312	6.10592
TBC1D10B	0.65526	0.000765256	0.0107741	6.40891	5.75365	7.07755	6.83313	6.0528	6.26773	6.44671	6.41805	6.53743	6.19846	5.55549	6.70172	6.25706	5.78972	5.46174	5.41923	5.59179	5.63517	5.49242	5.90883	6.26175	5.71875
TBC1D15	0.782653	0.026653	0.127231	6.6674	5.88475	7.03662	6.95863	6.85976	5.68259	6.33874	7.06809	6.58698	7.47523	6.55935	6.10804	6.77784	6.35137	6.04837	3.36335	6.51514	5.87364	6.22983	5.37951	6.29579	6.01265
TBC1D7	0.945547	6.14452e-05	0.00173844	4.42962	3.48408	4.90805	4.76931	4.26544	4.13946	4.34675	4.41021	4.50809	4.42684	4.48018	4.04192	3.77287	4.06767	3.92259	2.23373	3.08309	3.6504	3.69937	3.54379	3.0513	3.81597
TBCB	1.05082	0.00252669	0.0249124	8.25421	7.20339	10.0545	7.77021	7.77917	8.57698	7.77917	7.70785	8.76975	8.92582	7.60718	7.57148	7.8404	6.97844	7.37827	5.62781	7.45084	7.47166	7.72162	7.24764	6.95829	7.35894
TBCC	0.848728	0.00512299	0.0414403	6.32427	5.47554	5.55937	6.82109	6.72761	5.79668	5.58649	6.60256	6.43801	6.02759	6.3849	7.29844	5.25938	5.66342	5.89066	3.62627	5.832	5.83548	5.95327	5.49758	5.32566	5.87172
TBCCD1	0.739035	0.00481382	0.0394778	5.84253	5.10349	5.47826	5.80775	5.39544	5.91753	5.40369	5.35761	6.2842	5.33544	6.76804	6.67732	5.58575	5.37951	5.19795	3.81974	4.90681	4.907	5.21177	5.00056	5.23326	5.79257
TBCD	0.81971	0.00350618	0.0313923	6.80599	5.98628	7.69954	6.46523	6.00159	7.32121	7.45316	7.49222	7.08972	7.07054	5.3517	6.11503	6.25608	5.86386	6.07721	6.20475	6.21322	6.19301	5.86482	6.0528	5.50021	5.63688
TBCE	0.716906	8.7827e-05	0.00225863	5.8391	5.12219	5.9381	5.33216	5.65251	5.2608	5.57858	6.4003	6.32529	6.29838	5.66591	5.93894	5.07637	5.06009	5.00482	4.83819	5.21706	5.32833	4.77927	5.38064	5.28082	5.25631
TBX19	0.924395	7.07332e-07	6.76757e-05	6.01185	5.08746	5.69636	5.37823	6.29619	6.0516	6.061	6.31137	5.8513	6.06242	5.88918	6.52089	5.21706	5.26755	5.15368	4.66156	5.13521	5.23632	4.97668	5.16512	5.32194	4.73949
TCAIM	0.652818	0.0405282	0.168751	5.07459	4.42177	5.88003	5.46078	5.07096	4.45275	4.34527	6.02671	3.76207	5.24301	5.63959	4.86474	4.77068	4.73271	4.47686	2.58085	4.28466	4.84913	4.86428	4.35441	4.83586	4.46828
TCEB1	0.796771	0.0217893	0.111362	7.32421	6.52744	7.32723	8.06218	7.15985	7.7694	7.67797	7.73359	6.80753	6.30499	7.54532	6.85409	6.66276	7.14128	6.86888	3.96224	6.66104	6.92464	7.06245	6.4639	6.57787	6.94939
TCF15	0.750445	0.00346685	0.0312074	4.61106	3.86062	4.64855	3.5414	5.02091	4.7937	4.91151	5.14788	5.0936	4.59014	3.9879	4.37506	4.3415	3.61429	3.73812	4.9346	4.217	4.04527	3.21425	3.16923	3.7549	3.57703
TCF19	0.838263	0.010591	0.067579	4.75749	3.91923	4.83643	5.57108	4.2426	4.54025	5.28212	4.15331	4.17727	4.77927	5.82889	4.16372	4.26802	3.92817	3.87463	5.59073	4.2471	3.38336	3.47653	2.62147	3.54724	4.25506
TCF21	0.956809	0.00701659	0.0512171	3.61638	2.65957	4.22013	3.85172	3.10586	2.81069	2.91125	4.08139	2.53931	5.25824	4.93221	2.45296	2.95073	3.4135	2.50177	2.97519	2.34672	2.4533	2.09247	2.45607	2.79748	2.60843
TCF7L1	1.85498	0.000195291	0.00406955	5.21981	3.36483	6.58698	3.81755	4.85612	5.07309	3.98464	3.95292	7.32368	4.59599	5.05015	6.95702	3.06154	3.57766	2.99413	2.2342	3.54405	3.4393	3.39131	3.68104	3.64915	4.07596
TCFL5	1.08886	0.00954795	0.0634977	7.07356	5.9847	6.85552	6.56173	7.75841	5.5613	7.85274	8.03619	8.27553	7.01707	6.80227	6.01487	5.35533	5.98785	6.26625	3.63417	6.38692	6.24112	6.89987	6.18619	6.54233	6.34697
TCOF1	0.672307	0.00087996	0.0118948	5.31509	4.64278	5.49677	5.74295	5.21456	4.97852	5.88094	4.97072	5.57266	5.4838	4.33762	5.47236	4.7932	4.5166	4.29929	4.47213	5.02451	4.52658	4.30033	5.21598	4.85777	4.42144
TDRKH	1.0962	4.1335e-06	0.000238571	3.71401	2.61781	3.74261	4.217	4.03749	3.77323	2.86085	3.76898	3.85645	2.84494	4.44732	3.59125	2.61253	2.82662	2.64267	2.31358	2.66108	2.76187	2.40904	2.6248	2.29878	3.02714
TEC	0.794435	0.00305976	0.0285087	5.19127	4.39683	6.68693	5.25529	4.91975	4.56214	5.70168	4.71058	4.76163	5.81753	4.75979	4.73735	4.28824	4.97668	3.91416	4.91975	4.48345	4.04114	4.04444	4.62552	4.08368	4.59125
TFAP2A	0.775183	0.00500918	0.0407795	3.70352	2.92833	2.84218	4.44418	4.17765	2.57554	2.78725	3.25535	4.19488	3.99002	4.09736	4.67076	2.58887	3.29256	2.92539	3.26313	2.80026	2.87439	3.38998	2.66909	2.72597	2.75371
TFAP2C	0.657218	0.00738905	0.053237	5.89185	5.23463	5.49527	5.22243	6.48512	6.27107	6.60807	6.37883	4.59859	5.66159	6.1869	6.01063	5.27642	5.28	5.37694	5.66397	5.10245	4.85809	5.62079	5.11138	5.48934	4.56694
TFDP2	1.13294	0.000641183	0.00950082	5.88328	4.75035	7.52078	5.24227	5.25564	5.86341	5.90385	5.55315	5.95952	5.56727	6.75558	5.21138	4.52658	5.08007	5.42616	3.69815	4.59248	5.24789	5.41992	4.83243	4.00201	4.67779
THBS3	1.20187	3.47435e-05	0.00114925	7.70389	6.50202	8.72977	7.46623	7.53329	7.38095	8.34459	7.5077	7.4837	7.90884	6.84092	7.84294	7.02056	5.79453	6.47071	7.21641	7.00031	5.95832	5.8513	6.8088	6.76261	6.13662
THEM6	1.18891	0.000135661	0.00308844	5.43165	4.24275	5.54902	6.82973	5.24079	5.48461	5.99541	6.42085	4.99898	4.44977	4.81381	4.53354	4.10194	4.47452	4.36115	4.58751	4.12349	4.63806	4.24362	3.83373	4.26585	3.7976
THEMIS2	1.03394	0.00417977	0.0354712	4.98121	3.94727	5.99586	6.4983	5.22212	3.96812	4.1158	4.33382	5.10169	4.57491	6.20834	3.79316	4.24521	3.55324	3.63098	3.7095	4.17646	3.8234	3.86319	3.79083	3.6682	5.01167
THUMPD3	0.834471	0.0183587	0.0987642	7.04523	6.21076	6.43091	6.87861	7.21444	6.6705	6.2787	7.33314	6.74278	7.20962	7.82778	7.8658	6.96462	6.87017	6.59849	3.71963	5.83852	6.05815	6.34741	6.30383	6.61032	6.79643
THY1	1.01592	0.0421601	0.173435	6.83392	5.818	8.57534	5.42706	6.0211	7.87265	5.80155	7.32121	5.75696	8.21863	8.60832	4.73634	5.63361	5.97056	6.26175	7.43005	5.69116	5.11979	5.20293	5.48017	5.79668	5.5933
TIGD1	2.11015	0.000141263	0.0031862	6.31406	4.20391	7.30332	5.46502	7.58628	5.46938	7.04153	4.9215	6.55173	6.16963	4.99329	7.63892	4.15196	3.34625	4.18981	1.65219	4.90368	3.94173	4.34921	5.54531	5.31303	4.64593
TIMELESS	1.17331	2.60313e-06	0.000171664	5.34904	4.17573	5.69164	4.72327	4.84197	5.96403	5.19445	5.75476	5.74405	5.73612	5.33922	4.50084	4.19686	4.84518	4.30337	3.88417	4.11364	3.80204	4.1034	4.30772	4.25104	3.94987
TIMM10	1.14429	0.000461203	0.00759833	7.76707	6.62278	8.72501	7.34775	7.02454	7.558	8.18376	8.02301	9.08504	6.36334	7.67446	7.68582	6.67914	6.81815	6.69975	5.58951	6.96147	6.77557	6.49524	6.18137	6.76855	7.25909
TIMM44	0.61665	0.0144829	0.0842555	6.36364	5.74699	7.11777	7.23706	6.0826	5.63546	5.94407	5.9223	6.88999	5.98995	6.05935	6.75782	6.17183	5.41992	5.58375	6.89836	5.53987	5.32353	5.38802	5.35014	5.82503	5.96943
TIMMDC1	1.05789	0.0186229	0.0998235	9.25107	8.19319	9.38558	9.26435	9.22502	8.91176	9.41887	9.43172	8.16815	9.89183	9.85534	8.95812	8.16592	9.16374	8.70112	4.58705	8.39111	8.36067	8.4272	9.01321	8.68537	8.43651
TIMP2	1.58232	3.47179e-05	0.00114925	6.11983	4.53752	7.27566	4.71858	4.99299	7.10739	5.24642	6.38634	5.99752	7.33159	5.6914	6.45044	4.43283	4.51534	4.50166	4.25581	4.34792	4.32659	4.3301	4.411	5.0022	5.25173
TK1	1.22971	4.54024e-06	0.000254082	5.92898	4.69928	6.43801	6.11221	5.27677	6.26507	6.56249	6.86459	5.52987	5.5031	5.60872	5.12901	4.49741	4.85612	4.73492	4.45582	4.69821	4.93795	4.79623	5.03046	4.8268	4.15887
TKT	0.595773	0.0496476	0.193336	6.15307	5.55729	6.31669	7.92396	6.36246	5.68857	6.4605	5.20766	5.52548	5.70086	5.62215	6.72235	5.41345	5.5272	5.96924	4.23978	5.47458	5.43207	5.67977	5.73138	5.93558	6.16987
TM7SF2	1.09018	0.00599546	0.04584	6.13545	5.04527	5.50268	7.65746	5.44866	5.99273	7.42294	5.90633	7.27831	4.57451	5.57207	5.99878	4.63174	5.28251	4.96737	6.44912	4.90933	5.27408	5.58649	4.14369	4.81381	4.39455
TM9SF4	1.04243	4.46089e-06	0.000250429	6.35047	5.30804	6.67172	6.70918	5.69404	6.5826	5.74336	6.64794	7.13585	5.75063	6.34024	6.22911	5.19248	5.40068	5.23632	4.89141	5.25409	5.49629	5.53598	5.05268	5.4442	5.57622
TMED3	0.694756	0.0215718	0.110568	7.46998	6.77522	7.05499	7.76357	7.66963	7.99214	8.55845	7.83011	6.76546	6.65293	6.57067	7.84182	6.45191	7.52407	7.44205	5.29956	6.91993	6.69016	7.13287	6.53166	6.53195	7.22803
TMEM106C	0.891021	0.000506567	0.00804181	7.77912	6.8881	7.96649	6.95033	7.66695	8.10061	7.34567	8.12084	7.44021	7.83852	8.814	7.5476	6.97395	7.69241	7.20295	6.07789	7.04328	7.03396	7.00824	6.08673	6.95322	6.80836
TMEM108	1.53672	0.000721539	0.0103269	4.94778	3.41107	6.55099	3.32733	4.72374	4.93757	3.16797	3.55827	6.13543	6.45191	5.68259	4.94206	3.36305	3.73812	3.28011	4.00147	3.09673	3.46042	3.52254	3.30355	3.3083	3.03637
TMEM132A	0.63538	0.000970979	0.0127524	4.79465	4.15927	4.78652	5.07854	4.84411	4.78971	4.90146	4.78582	5.12901	4.27488	4.60526	4.75122	4.50334	4.17646	4.15741	5.1167	3.9246	3.45369	3.66027	3.93163	4.34251	4.32612
TMEM147	1.31483	1.88089e-05	0.000727707	7.74035	6.42552	8.12403	7.15392	7.6505	7.76013	7.71371	7.1448	8.65306	8.25637	7.04719	7.89975	6.87768	6.70643	6.56788	5.0796	5.7726	6.85653	6.28573	6.47247	6.68301	6.95322
TMEM160	0.962236	0.0024124	0.0241729	4.636	3.67376	5.27165	4.7582	4.595	6.25608	4.67746	3.80603	4.47567	4.23509	4.33068	3.95411	3.12472	3.40835	4.04924	2.98331	3.78014	3.35189	5.00145	3.98082	3.86818	3.1895
TMEM177	1.01538	0.00728354	0.0526713	5.82479	4.80941	5.61836	7.82124	5.82997	6.05092	6.03626	5.4546	5.00384	5.78047	5.90445	4.74776	4.64428	5.77856	5.64663	3.37353	4.64636	5.02188	5.82403	4.71822	4.47658	3.96406
TMEM185B	0.79464	0.0359524	0.155861	5.95956	5.16492	7.41729	6.9428	6.04354	6.11263	4.85612	5.18011	4.86995	6.13724	6.53673	5.49915	5.0326	5.6014	5.98289	3.25146	5.22685	5.09582	6.17899	4.58452	5.43622	5.25842
TMEM186	0.889928	0.0149705	0.0861399	7.1064	6.21647	6.41805	7.98814	7.64602	7.46471	7.85131	6.49772	6.33034	6.70319	7.5698	6.59468	5.94021	6.85976	6.33984	3.85272	6.67349	6.35343	6.59849	6.75399	6.98554	5.8072
TMEM189	0.586907	0.000539115	0.00840494	7.44053	6.85362	7.4828	7.09454	7.14677	7.33812	7.87265	7.61803	7.67578	7.371	6.81474	7.99084	6.90604	6.88039	7.02346	6.23981	6.60256	7.01065	7.03174	7.02409	6.86888	6.94859
TMEM194A	0.861239	0.00133661	0.0159251	4.90112	4.03988	5.32833	4.45679	4.70692	4.81887	5.22185	5.70571	4.36647	5.06307	4.8351	4.50809	3.8751	4.0639	4.35396	2.44451	4.4674	4.33068	4.40606	3.78605	3.95239	4.71878
TMEM223	0.65214	0.000446527	0.00744742	6.53356	5.88142	6.16339	6.43458	6.82195	6.0886	7.14002	6.63177	6.87716	6.33779	5.90318	6.9372	5.43237	5.79527	5.78838	6.36398	5.80917	6.11503	5.97166	6.00814	5.96504	5.56519
TMEM230	0.859261	0.00904894	0.0616756	4.34899	3.48973	3.67427	5.41345	4.23203	3.74009	3.93988	4.71311	3.44442	3.98194	6.35384	3.99687	3.23515	3.9753	3.71798	2.95944	2.95134	3.49188	4.13057	3.12472	3.73388	3.57703
TMEM237	1.05481	0.000303966	0.00561722	5.90855	4.85373	5.65965	5.93921	6.00463	5.20362	6.28321	5.18782	6.06748	6.36975	7.00031	5.36978	4.12768	5.4866	4.5394	4.0386	4.72806	5.43074	5.69086	5.11703	4.68944	4.6889
TMEM251	0.9394	0.0191747	0.101921	5.20347	4.26407	4.88125	5.96718	5.61901	5.81378	5.05163	5.10443	4.61859	4.79997	5.90488	4.27403	3.09358	5.8444	5.15295	2.85913	5.52364	4.84443	4.68648	3.37579	3.16255	4.0978
TMEM38A	0.618255	0.0208587	0.108033	5.45023	4.83197	5.21793	5.13397	5.22511	6.04923	5.44744	5.42058	5.19876	5.68299	6.00987	5.11641	4.55402	4.57696	4.42825	6.77784	4.40534	4.39646	5.22288	4.94427	4.36887	4.64485
TMEM39B	1.23945	1.30847e-06	0.000103953	6.00435	4.7649	6.77939	5.74582	6.21381	5.8513	5.82612	5.71971	6.47488	5.80373	5.56628	6.06242	4.61596	4.87248	4.66081	3.94271	4.35972	5.43683	4.7986	4.7527	4.71339	5.4958
TMEM45A	1.76388	0.000417609	0.00708302	5.23899	3.47511	6.82271	5.81687	5.16322	7.71506	5.03604	4.28526	4.40321	4.80235	4.00941	4.33578	3.32782	5.01844	3.64006	2.98957	3.65923	2.33433	2.80867	3.30658	3.50559	4.16076
TMEM60	0.787497	0.00293048	0.0275639	7.14463	6.35713	7.26059	6.87925	7.37827	7.08705	6.93813	8.15403	6.98932	6.46248	6.97844	7.31871	6.22104	6.90733	6.67732	4.80235	6.38939	7.15232	6.31628	6.16713	6.5661	6.37205
TMEM69	1.05591	0.00325402	0.0298344	9.00092	7.94501	9.98469	7.96299	9.88683	8.67238	9.24732	9.12485	8.63977	9.01041	8.85664	8.62325	8.06514	8.25388	7.90734	5.51528	8.20946	8.10171	8.33755	8.31914	8.54918	8.19141
TMEM79	1.11583	4.15447e-05	0.00129935	5.08248	3.96665	4.82304	5.55149	4.87541	5.74369	5.34383	5.79368	5.0086	3.91708	4.56334	5.20468	3.46817	4.16076	3.64285	3.17747	4.52319	4.2235	4.12856	4.14758	4.11916	4.07528
TMEM8B	0.886231	0.00136187	0.0161052	5.66077	4.77453	5.38967	5.43875	5.8097	5.22825	6.03375	6.23187	5.67856	5.7641	5.63723	5.39578	5.80155	4.5384	5.05551	3.216	4.50705	4.81527	4.29169	4.70987	5.46304	5.34695
TMEM9	0.894811	3.1658e-05	0.00107108	7.77212	6.87731	8.21863	8.06311	7.73013	8.36067	7.6738	7.78791	7.35984	7.42373	7.72035	7.38298	6.95157	7.25972	7.30441	5.98743	6.47298	6.66979	7.24838	6.92634	6.88098	7.07145
TMPRSS4	1.31706	0.00114246	0.0142569	5.04609	3.72902	4.33263	4.74802	4.64284	5.4311	6.60654	6.59902	5.69207	2.9375	4.78844	4.68272	2.90767	3.21683	4.17199	3.6895	3.58892	3.77697	4.22432	3.75677	3.90978	4.04747
TMSB10	1.13112	3.07867e-06	0.000190899	11.5582	10.4271	12.5384	10.7879	11.4207	11.832	11.756	11.756	11.4072	11.6876	11.025	11.3714	10.2538	10.3565	10.6473	10.5643	10.8161	10.2391	10.4738	9.7998	10.2808	10.8395
TMSB15A	1.37829	0.000654188	0.00964799	5.25516	3.87687	6.15915	3.14278	3.96696	5.39752	5.68857	5.67463	5.45259	5.95152	6.34221	4.7757	3.13003	4.45904	3.67396	5.0694	3.67183	3.50321	4.05087	3.69335	3.55005	3.96696
TMTC4	1.15517	0.000491955	0.00790513	4.51893	3.36376	6.44697	4.34339	4.89651	4.6402	3.30862	3.60298	3.98097	4.24521	5.00418	4.72027	3.88775	3.25066	3.96041	3.04659	3.48059	3.08873	3.13718	3.40211	3.14639	3.23719
TNFSF4	1.14915	0.00539834	0.0425957	4.66475	3.5156	6.02532	4.50561	4.03777	4.80367	3.90891	4.2245	4.74372	6.56495	4.78773	3.04534	3.61646	3.86053	3.81693	2.52332	5.10703	2.69269	3.44633	3.31942	3.60844	3.16487
TNNI3	1.27732	0.00265354	0.0258046	5.85877	4.58145	7.72632	7.55224	6.16734	6.64265	4.64766	6.16536	4.96535	5.63688	4.59709	4.4868	5.16691	4.67961	4.52206	4.06975	4.58155	4.98187	3.97127	4.76163	4.31029	4.76962
TNNT1	3.41186	1.30398e-06	0.000103953	8.02506	4.61321	9.3672	9.79287	7.6904	9.19713	9.30075	7.98326	6.41998	7.70469	5.51127	7.28306	4.86627	4.95953	4.73221	6.10179	4.73595	3.21957	3.64915	3.46042	4.26122	6.14594
TOMM40	0.817953	3.09133e-06	0.000191019	5.86622	5.04826	5.95116	6.10592	5.84409	6.44613	5.99187	5.63857	5.7525	5.89397	5.73841	5.29956	5.10984	5.01533	4.64206	5.5901	4.86206	5.04253	4.95985	5.04384	4.99414	5.22288
TONSL	0.776179	1.73476e-05	0.000692192	4.16443	3.38825	3.81776	5.03232	3.97852	4.36825	4.17015	4.02985	4.34876	3.72123	4.15764	4.0198	3.48412	3.69287	3.5449	3.64146	3.26855	3.23855	2.99961	3.26157	3.50998	3.24088
TOP2A	3.79706	2.69255e-09	1.51232e-06	7.2049	3.40784	7.41648	7.72632	6.51833	7.74782	7.84182	7.37173	6.9428	7.77157	8.0516	4.66055	2.44153	4.97598	3.53496	2.52914	3.66027	3.04861	3.90269	2.94461	2.76164	4.27895
TOPBP1	1.20966	0.0010923	0.0137862	7.71822	6.50856	8.1949	7.08377	8.05768	8.56694	6.01343	8.7455	7.21223	7.9049	7.82871	7.5742	6.13823	6.75345	6.40106	4.76433	6.85918	6.42146	7.12443	6.91075	7.26659	6.44613
TPD52	1.08256	0.00626254	0.0472038	5.48012	4.39756	5.29119	6.85772	5.92434	5.7948	6.29787	5.88855	4.52038	3.98588	5.8582	4.38222	3.90595	5.46031	4.83313	2.61729	4.65756	4.45175	4.91734	4.0165	4.56417	4.55161
TPD52L2	1.03139	0.000475937	0.0077279	7.25788	6.22649	8.71619	7.5698	6.67661	6.80227	7.14886	6.93503	8.28963	7.1583	6.56935	6.71273	6.74519	5.98785	6.38634	6.84551	6.53453	5.90615	5.66871	6.16987	6.11372	5.90699
TPI1	1.12215	5.87465e-05	0.00169087	6.68934	5.56719	6.33509	7.43624	6.72235	7.59226	6.83616	5.92537	6.45656	6.85653	7.10546	5.62735	5.39197	6.19301	6.06494	5.46304	5.06144	5.75754	5.69843	5.11291	5.22243	5.70614
TPM2	0.899072	0.00721601	0.0524362	6.43905	5.53998	7.77591	6.19089	5.81451	6.56323	7.6818	6.10901	5.7053	7.00263	5.54616	6.00109	6.58171	5.36497	5.44515	4.28709	5.639	5.51458	5.09918	5.86833	6.13098	5.4688
TPRA1	0.593257	0.00431475	0.0363531	4.63741	4.04415	5.2302	5.07061	3.96466	4.70987	4.78811	4.60561	4.40667	4.25012	4.63562	4.71262	3.79887	4.30912	4.4094	2.89306	3.91132	4.39906	4.39658	4.10223	3.90332	4.31858
TPX2	2.70479	4.58305e-08	1.19941e-05	5.99384	3.28905	5.78399	6.48202	5.65656	6.89107	5.40142	6.57356	6.36858	5.81538	7.05872	3.90712	3.62944	4.25068	3.20893	2.20936	2.94683	3.00138	3.46928	2.76679	3.61646	3.79139
TRAIP	0.76124	0.00700424	0.0511479	4.82334	4.0621	5.08317	5.03639	4.71103	4.82623	4.43883	4.76655	4.70134	4.61999	4.86206	5.18782	4.00385	3.3243	3.26918	6.13943	3.89796	3.7271	3.72533	4.03391	4.05147	4.44849
TRAPPC3	0.856053	4.92073e-05	0.00148675	7.13973	6.28368	7.94966	7.16813	6.6658	6.55234	7.18959	7.14613	6.73661	7.79847	7.14727	7.04328	5.91459	6.16589	6.45347	6.42048	6.00516	6.19521	6.4657	5.9223	6.59468	6.69928
TRIB3	0.603492	5.07408e-05	0.00152017	4.15103	3.54754	3.91438	4.54649	3.85645	4.40906	3.99955	3.73978	4.31359	4.02779	4.16266	4.54058	3.90872	3.50698	3.35169	3.62198	3.42868	3.71126	3.46584	3.42288	3.32373	3.73365
TRIM24	0.755379	0.000574419	0.00876704	6.18657	5.43119	6.36246	5.73612	5.97166	6.73907	6.37545	6.69842	5.31949	5.71875	6.50735	6.43694	5.78315	5.74203	5.63207	4.76962	5.15879	5.07715	5.62558	5.30471	5.91411	5.30471
TRIM28	0.931674	0.000271866	0.00518047	7.64434	6.71267	8.71375	8.41178	7.30044	7.26213	7.0251	7.67797	8.01027	7.43005	6.86501	7.74696	6.13823	7.09839	6.81142	6.7548	6.45006	6.68271	6.96634	6.83046	6.18427	7.21003
TRIP10	0.684213	0.000659242	0.0097007	4.71204	4.02782	4.67464	5.16793	4.10808	4.39511	4.42768	5.2567	5.12635	4.41329	4.1689	5.38169	4.36322	3.55595	3.88167	4.0771	4.35642	3.86682	4.16866	3.78468	4.02565	4.19808
TRIP13	0.98972	0.0246264	0.121019	7.33488	6.34516	6.61601	7.93155	6.94236	8.22711	7.48679	7.44297	7.26464	7.20962	7.34072	6.88703	6.22283	7.10236	7.02204	4.15076	7.13023	7.80144	7.9326	6.12643	5.14828	4.81464
TRIP6	0.810798	0.0116822	0.0724124	7.93285	7.12205	7.47996	8.7664	7.97209	7.28824	9.14547	7.61922	7.97985	7.34496	7.52926	8.20307	7.64885	6.8206	7.58693	5.28341	7.40739	7.02563	7.078	6.78377	7.65336	7.9326
TRIT1	1.05578	0.000457823	0.00757196	8.55639	7.50061	9.42538	7.88062	9.02645	8.03132	8.01156	8.66388	8.12403	10.0275	7.92482	8.4484	7.93977	7.63341	7.20962	6.65345	7.80662	7.68216	7.48679	7.96649	7.58334	7.04444
TRMT1	0.788099	0.010388	0.0667385	5.32154	4.53344	5.48268	6.00683	5.15193	4.48458	5.53756	4.65242	5.32353	6.55412	4.53734	5.48443	4.81634	4.13093	4.03527	6.08546	4.1472	3.70199	4.63678	4.64557	4.81926	4.31563
TRMT10C	0.731257	0.00854498	0.0591699	6.85813	6.12687	6.02251	6.96364	7.02697	6.66803	6.90663	7.65161	6.21125	6.8891	7.01707	7.22447	5.88232	6.52626	6.73474	4.89989	5.36731	6.06242	6.99201	5.89964	5.9277	6.97643
TRMT112	0.706436	0.00177536	0.0193711	9.33167	8.62524	9.44576	9.98648	9.77934	8.71375	9.08667	9.42855	10.4113	8.59451	8.48049	9.38989	8.54226	8.65555	8.60651	8.65154	8.73768	8.48049	8.76975	8.54846	8.45302	8.8071
TROAP	1.24606	1.31995e-07	2.23712e-05	5.3245	4.07844	5.8113	4.94821	4.82245	5.29603	5.30397	5.09547	5.9103	6.08006	4.99446	4.98274	3.86795	4.19827	4.03929	4.28466	4.4261	4.03902	4.21389	3.63469	3.98937	4.09115
TRPT1	0.605796	0.0033708	0.0305276	6.42087	5.81507	6.07215	7.32285	6.81142	6.29536	6.95547	6.33509	6.77075	5.47718	6.14132	6.02709	5.63829	5.80373	6.01243	5.9469	5.8582	5.92354	5.36536	6.1741	5.65998	5.76818
TRUB2	0.616821	0.0151479	0.0866912	6.20653	5.58971	6.87251	7.42205	5.82097	6.12388	6.61383	5.91805	6.02058	6.25296	5.36426	5.65618	5.5483	5.58173	5.34256	6.41564	5.72139	5.66526	4.61814	5.37011	5.94228	5.69164
TSHR	0.617661	0.0452005	0.181637	2.94925	2.33159	2.3391	2.32308	4.08842	2.7811	2.48285	1.94831	4.72624	2.18104	3.12864	3.49369	2.37428	2.04741	1.89764	3.03902	2.12681	2.09544	2.57373	2.41717	2.52435	2.22003
TSN	0.592041	0.0428723	0.175433	6.29683	5.70479	6.50853	7.04887	6.29498	6.23981	5.60298	6.1438	5.37483	6.23981	6.81626	6.69842	5.82149	6.26659	5.8396	3.6133	5.98105	5.81753	6.08742	5.76266	5.90445	5.95378
TSPAN7	1.58342	0.000670218	0.00978441	5.76413	4.18071	4.78914	5.14149	6.74073	8.30009	4.91539	6.59393	6.77219	5.28581	5.04311	4.05942	4.1418	4.67639	3.88859	4.31248	3.65091	4.21365	4.60146	4.51005	3.63271	4.17904
TSPYL5	1.82755	0.000135714	0.00308844	7.877	6.04945	7.51738	7.71706	6.52032	9.30959	6.66446	9.08919	8.51067	7.5254	7.88683	8.02909	5.53304	6.59186	6.1958	3.52139	6.65148	6.45996	6.46139	6.08452	6.39438	6.60069
TSTA3	1.71417	0.000227365	0.00456165	7.76767	6.0535	8.38519	10.0909	7.92582	6.40767	6.77557	9.18043	7.31762	6.65853	7.85815	7.07686	5.8941	6.33823	6.12506	4.68784	6.32195	6.07626	5.90125	6.2259	6.70172	6.26267
TTF2	0.867332	0.000105324	0.00256407	4.14482	3.27749	4.34648	3.86366	4.1231	4.58155	4.48084	4.04036	3.80101	3.95599	4.40632	3.84889	3.35905	3.34706	3.05746	1.95513	3.57158	3.26961	3.301	3.52576	3.73812	3.65011
TTI1	1.23931	0.00348173	0.0312611	7.45748	6.21817	8.01521	6.67283	7.25344	7.45927	7.05254	6.99201	9.01041	7.37282	6.67973	8.0665	7.01347	6.12239	6.22682	3.41753	6.99916	6.46105	6.27107	6.72521	6.67781	6.26714
TTK	3.40152	9.03107e-12	2.29596e-08	6.20709	2.80557	6.47855	5.89574	6.44671	5.48886	6.66938	6.24447	7.11861	6.02027	6.84627	4.86206	2.54188	3.6895	2.69877	2.65493	2.72457	2.23908	3.42177	2.80935	2.11494	3.16089
TUBA1C	0.621176	0.00416463	0.0353934	10.7628	10.1416	11.496	11.5887	10.4331	10.5923	10.3628	10.9724	10.7405	10.7633	10.8395	9.8389	9.99938	10.3934	10.1993	10.7633	9.78529	9.89183	10.1942	10.1163	9.59893	10.4738
TUBA4A	0.60082	0.047652	0.188113	7.73722	7.1364	7.74608	8.79458	8.54064	8.88149	7.60611	7.00263	7.66768	6.01222	7.47101	7.64977	7.13517	7.07284	7.16353	6.76958	7.6895	6.4639	7.35549	6.84998	7.1039	7.76013
TUBB	1.36878	9.49094e-05	0.00237794	8.7302	7.36142	9.85811	9.8798	8.28963	8.54364	9.09099	7.27566	8.82588	8.46554	8.75363	8.31914	7.50528	8.13672	7.66277	6.33385	7.26659	6.74939	7.32465	7.06879	7.53001	8.03619
TUBG1	1.57285	8.38645e-06	0.000401197	6.03723	4.46438	6.48202	6.96864	4.84151	6.43522	6.34697	6.36482	6.05462	5.30205	5.9103	5.66616	3.78778	5.72945	4.80676	3.49615	4.35889	4.33496	4.78621	4.09385	4.36034	4.8894
TXNRD3	0.92671	0.00103003	0.0132636	5.87137	4.94466	5.99273	5.11979	5.03566	5.69614	5.85219	6.45771	5.316	6.77838	6.44572	6.01942	3.98908	5.41515	4.59599	5.99187	4.85167	5.1201	4.8273	5.12825	4.50809	5.01914
TYMS	0.871342	0.000292329	0.00545313	5.16079	4.28944	5.18475	5.55744	5.64779	5.0916	5.47783	4.89667	4.7008	5.2686	5.71435	4.06804	4.0673	4.9405	4.53269	3.45423	4.26934	4.63977	4.36612	4.00316	4.50124	4.1201
U2SURP	0.709732	0.044903	0.180666	7.84322	7.13348	7.93977	7.08121	7.71594	8.00574	7.49868	7.9055	8.29451	8.22802	7.96738	7.79542	6.71778	7.20647	7.0658	4.53627	8.21066	7.32223	7.29559	7.91759	8.21617	6.84627
UBAP2	0.600726	0.00654385	0.0486239	8.15853	7.5578	7.79628	7.41897	7.9209	7.95998	9.03489	8.55478	8.30365	8.67836	7.32121	8.59623	7.66471	7.36664	7.25463	7.7931	7.68797	7.54098	7.02979	7.41324	8.11442	7.71251
UBAP2L	0.698623	0.000151356	0.00336691	6.64382	5.94519	6.67139	6.52815	6.83545	6.61909	6.98078	6.57067	6.27966	6.98932	6.12749	6.83616	6.34452	5.98243	5.80431	5.01211	5.85937	5.87674	5.96403	6.20183	6.16474	6.24185
UBE2C	2.99936	1.40414e-10	1.92217e-07	8.2501	5.25074	8.69228	8.75658	7.81913	8.81566	8.14097	8.21006	9.02941	8.10581	8.3858	6.54532	4.75874	5.38644	4.98388	6.39169	5.44313	4.78447	5.17046	5.45203	5.15807	4.97852
UBE2S	0.726124	0.0155482	0.0882322	3.90646	3.18034	4.7493	5.81249	3.32284	4.1435	4.05723	3.73494	3.42669	3.9665	2.69685	3.15424	3.0411	3.12267	3.02466	3.25178	2.99012	3.16385	3.34439	2.90178	3.26053	3.70247
UBE2T	1.20497	0.00013367	0.00306151	4.34167	3.13669	4.24289	5.26499	3.70467	5.03989	4.98109	4.62177	4.40169	3.5681	4.17966	3.41193	2.89871	3.14655	3.2324	2.2632	3.80995	3.93627	3.7681	3.01944	2.61598	2.67634
UBL4A	1.4022	8.34879e-05	0.00217533	7.9372	6.535	8.30936	8.8071	7.3116	9.22777	8.21066	8.49725	7.21444	7.05549	7.64382	7.09454	6.06494	6.93646	6.45656	5.31633	7.35837	6.42766	6.54414	6.83921	6.94001	6.46636
UBP1	0.645609	0.00156069	0.0177018	8.55344	7.90783	8.86825	7.96537	8.2603	8.7432	8.46397	8.78976	8.69829	8.53382	8.53519	8.67623	7.99891	8.14711	7.91759	6.68974	8.27985	7.77748	7.7931	7.70951	8.29096	8.47404
UCHL1	0.807099	0.0200465	0.104957	4.2514	3.4443	5.67094	3.5891	2.87695	4.70759	3.27073	4.94311	4.57897	5.33396	4.33368	3.20893	3.03456	3.2603	3.7874	2.5333	4.20686	3.42669	3.67676	3.82038	3.42574	3.27097
UCHL3	0.88313	0.0463229	0.184421	5.05437	4.17124	4.71311	5.59969	5.12439	6.36761	4.89651	4.53802	5.26289	3.58065	5.74226	4.71858	3.77963	5.36171	5.2012	1.72471	3.09564	4.8135	5.2449	4.50674	3.29153	4.69284
UCKL1	1.43111	0.00525641	0.0420418	7.86281	6.4317	8.83767	8.30365	6.89987	6.66979	7.5742	7.86496	9.05501	8.15799	6.20757	9.05741	6.30624	6.41564	7.07755	3.2423	7.09985	6.61308	6.37883	7.21223	7.13585	6.83545
ULK1	0.716681	0.0159242	0.0895611	5.20485	4.48817	5.91294	5.00091	3.68645	6.63386	5.46766	4.64147	5.6076	5.7641	4.29621	5.03733	4.59468	3.98697	4.47213	4.8107	4.64893	4.60321	4.17765	4.77002	4.71404	4.1034
UMPS	0.793519	0.00108597	0.0137531	5.81405	5.02053	5.73516	6.27001	5.85168	5.80104	5.94645	5.36426	5.36693	5.82846	6.42499	5.55149	5.02528	5.55187	5.64193	3.66304	5.14379	5.05175	4.45118	4.97323	5.46994	5.23326
UNG	1.47621	0.000873824	0.011832	6.23938	4.76317	7.18849	7.57314	5.7709	6.28729	6.95863	4.60833	5.59906	6.04393	6.17653	6.18746	5.1278	5.79297	4.90368	2.31718	5.31046	4.43493	5.21677	4.4868	5.29603	4.74508
UPF3B	0.847735	0.00594922	0.0456937	8.18898	7.34125	7.56897	8.06907	8.8071	8.07536	8.11442	8.76332	8.48992	9.23403	8.21943	6.54821	6.59512	7.71251	7.1724	7.89007	7.31871	7.29985	7.26577	7.98425	7.80057	6.37323
UPK1A	1.09166	0.0299993	0.137808	3.75191	2.66024	3.22045	2.6109	2.80694	7.33406	3.3796	5.2608	4.39173	3.20527	2.62871	2.68063	2.55177	2.66348	2.65783	3.52453	2.07846	2.30233	2.76875	2.14238	2.92981	2.98311
UPK3B	0.614455	0.0230898	0.115792	4.77863	4.16418	5.41052	4.09239	3.96671	4.21311	5.1475	6.05935	4.48742	4.94375	4.51511	4.95048	4.74881	3.71963	3.42413	4.4674	4.60665	4.4963	3.7456	3.71028	3.93075	4.79223
UPP1	0.978392	0.0122589	0.0750722	5.08786	4.10947	4.40462	6.21173	5.06608	5.42781	6.08931	5.3792	4.51463	4.68846	5.5149	3.58186	4.78731	3.75205	3.46719	6.09128	3.56849	3.95209	3.30682	3.77126	3.49478	4.90339
UQCRC1	0.692106	0.0265656	0.12695	8.55734	7.86523	8.85768	10.5643	8.38822	7.78484	8.13948	8.1316	7.9209	7.65461	9.61456	8.51717	7.5435	8.44752	8.16309	7.54532	7.91408	8.01739	7.98234	7.93022	7.371	7.73786
UQCRFS1	0.833487	0.0431512	0.176128	8.10821	7.27473	8.25753	9.7998	7.82778	8.58753	8.62325	8.07942	6.76737	7.77748	9.04266	6.31934	6.95322	8.09561	8.13271	5.77727	6.8343	7.38189	8.16716	6.67605	6.78929	7.93977
UQCRQ	0.713344	0.0179385	0.0972089	8.50988	7.79653	7.67165	8.27169	8.90802	9.59511	8.77341	8.54226	8.9412	7.22803	8.55678	8.61063	7.66366	8.40898	8.46268	6.18427	8.0245	7.9326	7.95123	7.54967	7.77748	8.01027
USE1	1.00889	1.8851e-05	0.000727707	5.61333	4.60444	6.0473	5.58625	5.56418	4.49125	5.46266	5.26705	5.66591	6.68693	5.43406	5.9277	4.76962	4.76962	4.56893	4.60146	4.69533	4.40906	4.32122	4.50084	4.7908	4.61747
USP18	1.02479	0.0229291	0.115235	5.33595	4.31116	5.60631	6.86784	4.43415	5.11138	6.18938	4.00998	5.93343	4.17229	6.60125	4.43353	4.44849	4.7819	4.53292	2.30378	6.15993	4.18034	4.26021	4.29101	4.01082	4.14216
USP19	0.706573	6.98973e-06	0.000346533	5.22909	4.52251	4.80933	5.29213	5.33688	5.49192	5.58216	5.08758	5.31841	4.88708	5.28027	5.20509	4.39906	4.31858	4.49196	4.62771	4.08462	4.60245	4.39658	4.5384	4.84518	4.92057
USP20	0.703124	0.0212175	0.109477	6.2378	5.53468	7.81409	6.85918	5.33859	5.34033	6.94001	5.70086	6.75612	6.27919	5.35613	5.99355	5.93921	5.17546	5.12979	5.03969	5.40736	5.40272	5.82227	5.30297	6.29261	5.83474
USP28	0.882985	0.000325492	0.00590465	4.76359	3.8806	4.50873	4.12645	4.3167	4.84826	5.23326	6.06889	4.25047	4.93324	4.9488	4.40108	3.88417	4.24609	4.27613	3.71454	3.69775	3.91852	4.00168	4.06368	3.86569	3.13776
USP39	0.938205	0.000392535	0.0067624	5.42366	4.48546	6.13098	6.16654	5.35217	5.57687	4.47712	5.36731	4.55189	6.18377	5.22266	5.2073	4.24487	4.7819	4.72806	5.26881	4.43384	4.75024	4.28121	4.21532	3.97127	4.17904
USP48	0.781888	0.0174079	0.095379	7.3853	6.60341	7.89545	6.83475	8.14482	7.57067	7.09903	6.78734	7.72449	7.72548	7.24686	6.82414	7.10979	6.84551	6.8038	4.53967	7.35139	6.84182	5.63641	6.64687	7.49151	6.76737
UTP11L	0.917692	0.000106067	0.00257865	6.25475	5.33706	6.20891	6.28729	5.78933	5.70486	6.15888	6.4683	6.31934	7.34647	5.95913	6.30499	5.43207	4.90203	5.41087	6.20023	4.93158	5.36387	5.52754	4.99719	4.89083	5.71435
UXS1	0.772404	0.028605	0.133716	5.04662	4.27422	5.2608	5.75018	4.5123	4.42684	4.87746	4.72663	4.80489	6.17559	5.18093	4.75058	3.57654	5.36853	5.04207	2.58887	3.66382	4.27094	5.80519	3.91963	4.00811	4.49847
VAT1	0.740498	0.00167673	0.0186494	7.32726	6.58677	8.13672	7.8404	6.68873	7.031	7.11135	7.44478	7.31955	7.49947	6.56625	7.6344	7.04493	6.27391	6.7272	7.52649	6.79767	6.22432	5.99087	6.48381	6.3581	6.44036
VAX2	1.48632	1.8098e-06	0.00013254	4.40396	2.91764	3.82124	3.32065	4.37309	5.26371	4.49741	3.72465	5.34695	4.92634	3.89664	4.8689	2.37114	2.94632	3.29948	2.98014	2.78145	2.95201	3.28455	2.90325	2.87306	2.78503
VEGFA	1.06989	0.0011611	0.0143927	6.62477	5.55488	6.35384	7.47021	6.96778	6.9123	6.15615	6.4639	6.74519	6.21069	6.74576	6.22187	5.35093	5.00482	5.17627	7.91759	5.41631	5.39335	5.27677	5.08655	5.35892	5.56727
VEGFB	0.710373	0.0100473	0.0654236	5.13245	4.42208	5.23454	6.86501	4.73872	4.74204	5.18993	4.25234	5.28649	4.70592	5.43328	4.87628	4.58664	4.10781	4.73221	3.82907	4.53907	4.6402	3.55005	4.71913	4.78368	4.73294
VGLL1	0.798122	0.000232033	0.00463367	3.77607	2.97795	3.36708	4.55344	3.49839	3.80178	3.61429	4.8064	3.90165	3.25066	3.27987	3.68718	3.43814	2.84464	3.01655	2.71959	2.82214	3.00814	2.71797	2.85943	3.09873	3.2542
VIPAS39	0.897349	0.000856867	0.0116581	6.50203	5.60468	6.25706	5.49629	6.81738	6.53031	6.10901	6.47543	7.85049	6.04837	6.36715	7.06879	5.97266	5.59543	6.19215	4.95281	5.18139	5.78007	5.50575	5.51579	6.07849	5.27222
VKORC1	1.05887	0.00164411	0.018367	6.14005	5.08118	5.75754	7.4828	6.67605	6.76082	5.86482	6.31669	5.6301	5.17134	6.20244	5.53786	4.3698	5.94971	5.80818	4.11854	4.01608	5.33439	5.13397	5.09244	5.43092	5.55778
VPS28	0.923196	0.0191646	0.101916	7.96259	7.03939	8.23156	9.72683	7.88857	6.58982	7.29559	8.64585	8.1513	6.7003	8.17007	8.22597	7.15616	6.72095	7.31955	4.98907	7.70593	7.47021	6.77075	7.39556	7.17409	7.69164
VPS72	1.33768	0.000564031	0.00865001	8.0001	6.66242	7.73219	7.80662	8.13948	8.36438	8.15403	8.14482	8.06311	7.57888	7.66557	8.35187	6.93414	7.07686	7.09356	3.66634	6.87925	6.83021	7.22447	6.84551	6.84998	7.22385
VSIG10	0.589519	0.0167578	0.0928174	4.56635	3.97683	4.64206	3.84799	4.39328	5.14861	4.72956	4.05274	4.69011	4.97631	3.86818	5.31464	4.09028	3.50858	4.56694	4.62791	3.22313	3.49958	4.42306	3.45153	4.49458	3.88271
VTI1B	0.804935	0.00111625	0.0140289	6.2625	5.45756	7.33208	6.76385	6.41253	6.20624	6.19662	5.51868	5.83773	5.84592	6.10197	6.40936	5.02327	5.80867	5.96525	4.70987	5.21598	6.01965	5.55778	5.8772	4.9366	5.46136
WASF1	1.04538	0.00960093	0.0637055	6.37271	5.32733	6.90104	6.3849	7.26659	6.74012	6.71903	5.59543	5.76067	6.76082	6.64727	4.95126	6.24567	6.38634	5.91572	3.37513	5.31424	4.26671	4.43717	5.28472	6.18969	5.85794
WDHD1	1.06346	2.60254e-05	0.000924446	4.32607	3.26261	4.56214	4.8689	4.46411	5.17272	5.0106	3.76552	3.56206	4.12412	3.90738	3.82311	3.19828	3.5105	3.14103	3.29344	3.38086	3.0471	3.94086	3.03478	3.1556	2.92362
WDR12	1.53679	1.18993e-07	2.05917e-05	7.91598	6.37919	7.44021	8.28366	8.47057	7.08432	8.08658	7.40186	7.9055	8.40225	8.10061	7.98425	6.43749	6.91407	6.53195	5.51012	6.40513	6.15792	6.98631	5.98785	6.5661	6.29498
WDR48	0.633846	0.0226301	0.114248	5.63728	5.00343	6.70172	5.7159	4.5113	4.8982	6.21587	4.84724	6.11503	5.73566	5.3647	6.26714	5.00482	5.22778	5.08239	3.73524	5.16906	5.15472	5.19662	5.20468	4.93874	5.32023
WDR5	0.603933	0.00324714	0.0297903	5.26433	4.66039	5.53327	5.55895	5.30616	5.34463	5.48752	5.10443	5.15193	5.58796	5.28509	4.28332	5.06459	4.74508	4.30912	3.74522	5.19072	4.70114	4.31884	4.69764	4.7415	5.09009
WDR70	0.770168	0.000829338	0.0113705	6.43811	5.66794	5.85794	6.95643	6.44953	7.00324	6.20713	5.49704	6.04122	7.30703	6.91602	6.14552	5.493	5.85901	5.95642	5.20564	5.69591	5.79923	5.90883	5.8047	5.32744	5.62924
WDR74	0.751676	0.00934397	0.0627255	7.00607	6.2544	7.33914	8.05564	7.0849	6.06387	7.35686	6.40936	7.37003	6.8264	6.28236	7.2722	6.7233	5.76508	5.53365	7.41099	6.59393	5.97015	5.35533	6.32698	6.60125	6.26332
WHSC1	0.746373	0.000910367	0.012172	5.42661	4.68023	5.11417	5.54725	5.71875	5.61966	5.7848	5.75754	4.78336	5.8513	5.73612	4.35312	4.86995	5.16131	4.79118	4.02947	4.17712	4.69593	4.50674	4.99621	4.97792	4.5965
WNT10A	1.497	0.000689802	0.00997215	5.04511	3.54811	6.66724	3.63979	6.71336	4.80145	3.35464	4.13057	5.78663	5.59073	4.45362	5.31303	3.36857	3.24018	3.6585	4.38051	3.94753	2.8378	3.66515	3.15608	3.23772	3.98908
WNT11	1.8875	0.00239437	0.024051	6.37432	4.48683	9.43764	4.27277	8.6906	5.88333	5.06376	4.68272	8.06442	6.11585	4.69764	6.83452	4.27521	3.97202	4.46951	4.65273	4.71706	4.03995	4.83819	4.74204	4.70327	4.45833
WNT7A	0.677213	0.0113156	0.0709534	4.6866	4.00939	5.40809	5.50151	4.7601	4.34675	4.46702	5.31949	5.38836	3.95041	3.47744	4.2468	4.15196	3.68489	3.8891	4.41873	3.64399	3.46719	4.53329	3.64399	4.26585	4.39487
WRAP73	0.869271	0.029235	0.135557	7.28346	6.41419	7.34827	7.33159	7.95258	7.02887	6.08931	8.24058	7.83654	7.28976	6.94859	6.76855	7.30044	6.49639	6.61427	3.5701	7.09454	6.90037	5.88574	6.72583	7.07686	6.47738
WT1-AS	0.639867	0.0289544	0.134641	6.47548	5.83562	7.13287	5.73393	5.72342	6.61969	7.20647	5.63803	7.30668	7.51912	6.04677	5.82785	5.69636	5.66159	5.48581	5.26965	6.57975	6.28729	5.72139	6.18098	6.35918	5.11417
WWTR1	0.599067	0.00967121	0.0640164	6.58996	5.99089	6.71954	5.80917	6.1752	6.93195	7.00877	6.42644	6.39169	6.34642	7.59401	6.49639	6.29619	5.88452	5.97895	6.98996	5.85676	5.73737	5.39197	5.77766	5.55315	6.44238
XPO4	0.662519	0.00100315	0.0130497	5.30264	4.64012	4.76962	4.89667	5.32833	5.28581	5.19626	5.12223	5.79327	5.36978	5.71777	5.54667	4.6117	4.79118	4.89743	3.73959	4.06831	4.40967	4.98034	4.97427	5.11861	4.81012
XPO5	0.735862	0.000450473	0.00749217	5.46493	4.72907	6.05775	6.28974	5.66722	4.89174	5.32535	4.89455	5.66682	5.42832	5.19365	5.2342	4.62734	4.70759	4.92881	5.44126	4.46378	4.5589	4.8894	4.24936	4.56931	4.85497
XPOT	0.830587	0.000613324	0.00919201	8.73501	7.90442	9.35967	9.27421	8.70981	9.08667	7.8266	8.78151	7.81409	9.52392	8.94595	8.02769	7.92396	8.14231	7.88759	7.53262	7.8266	7.92819	8.20727	8.05901	7.63813	7.89858
XRCC5	0.652869	0.0166011	0.0922684	7.59655	6.94368	8.21066	7.79179	7.73603	7.24838	8.00716	7.0213	7.36664	7.54839	8.21617	6.81896	6.50675	7.70371	7.45488	5.59906	6.73349	7.26404	7.51658	6.51461	6.55823	7.58545
YARS2	0.913584	0.00040628	0.00692544	5.43391	4.52033	6.05126	5.60527	6.1609	5.37357	4.57549	5.08919	4.93324	6.28463	5.2457	5.01988	4.71311	5.2359	4.75638	3.81858	3.95984	4.60956	4.54058	4.56027	4.24631	4.76274
YBX1	0.924868	5.72214e-06	0.000296021	7.48606	6.56119	7.50827	7.55418	7.78791	6.95829	7.94582	7.33093	7.86379	7.44297	7.44573	7.02274	7.02697	6.66724	6.58982	5.75202	6.8838	6.45895	6.41628	6.59661	6.43291	6.78734
YEATS2	0.766374	1.19417e-06	9.79326e-05	6.69341	5.92703	6.81228	6.11472	6.73661	6.50188	6.85064	7.00542	6.78734	6.73852	6.80029	6.58639	6.10179	5.83729	6.05021	5.61794	6.01487	5.80615	6.18833	5.72735	6.21493	5.71148
YIF1A	0.70438	0.0012206	0.0148881	8.19742	7.49305	7.20421	8.68385	8.53013	7.96649	8.43278	8.51792	8.31743	7.70138	8.16815	8.45191	7.2313	8.34906	7.81116	7.15296	7.44478	7.7931	7.02697	7.40365	7.53329	7.1842
YKT6	0.643674	0.00456676	0.0379041	4.29551	3.65183	4.9215	5.27373	3.936	4.56664	4.45772	4.24903	4.0732	3.69517	4.06831	3.71375	3.34469	3.54973	3.67807	4.74397	3.26875	3.58302	3.74648	3.55776	3.47711	3.56874
YPEL1	0.897497	0.000257267	0.00496802	4.06354	3.16604	4.21247	4.65975	3.75788	3.02466	4.7749	3.96354	4.28495	3.6693	4.57766	3.71028	3.09358	2.71098	3.03707	2.43548	3.55232	3.69085	3.34393	3.13911	3.2192	3.43793
YTHDF1	0.694884	0.00206768	0.021587	9.90484	9.20996	10.2808	9.35967	9.54159	9.53512	9.95298	9.69326	10.6386	10.2808	9.81265	9.95298	9.15784	9.58482	9.25677	7.89626	9.20397	9.25445	9.20159	9.70497	9.53223	9.30668
YWHAG	0.65012	0.0101898	0.0660127	10.749	10.0988	10.1993	11.3377	10.9576	11.6435	11.2093	10.8699	9.80383	10.0866	11.0847	10.297	10.2471	10.7528	10.1163	9.22777	9.61456	9.81265	10.1383	10.2232	10.4504	10.4053
ZBTB48	0.688304	0.00614475	0.0466611	5.71285	5.02455	6.60256	6.1143	5.73029	5.39857	5.78743	5.93956	6.33284	5.01101	4.90368	5.30829	4.71913	4.6117	5.03639	4.56292	5.00835	5.17766	5.56615	5.28754	4.35373	5.92191
ZC3H3	0.844352	0.00279364	0.0267432	5.38822	4.54387	5.86442	6.22369	5.05785	4.72596	4.86177	5.95801	6.07061	4.42412	4.51394	6.18186	4.71509	4.09409	4.10781	4.42684	4.90267	4.08318	4.74903	4.85581	5.08007	4.42412
ZC3H8	0.942382	0.0262673	0.126012	7.21319	6.27081	6.85465	7.04788	7.17576	7.65161	7.00092	7.40739	6.18186	8.72798	7.62312	6.46077	6.31721	6.86543	6.87139	3.34367	6.2787	6.21662	7.04657	7.21288	6.77557	5.78007
ZDHHC16	0.70911	0.0159194	0.0895611	7.66102	6.95191	7.13338	6.30699	7.78387	8.50847	7.37384	8.29741	8.09561	7.89099	7.14552	8.07408	6.82414	7.23207	7.35939	5.35761	7.39107	6.95271	6.89107	6.97165	7.19913	7.34022
ZDHHC9	1.04049	0.000554895	0.00856454	5.70077	4.66028	5.65015	7.25972	6.41378	5.93003	5.53365	5.69207	5.49051	5.08461	5.42291	4.53022	4.43739	5.15145	4.67961	4.05752	4.83863	4.80459	4.90805	4.0111	4.49847	5.21598
ZFP69B	0.874633	0.000399801	0.00685416	3.16293	2.28829	4.57723	2.3664	3.36857	3.27038	2.91318	2.18846	2.85051	3.48412	3.51316	3.09724	2.3296	2.26217	2.21957	2.2632	2.37953	2.35115	2.12341	2.44663	2.30816	2.1995
ZFP82	0.969587	0.00834046	0.0581496	4.96721	3.99762	4.8281	3.8448	4.67779	3.97415	4.51691	5.66616	4.95159	6.63809	5.66221	4.9123	3.45472	4.69568	4.23493	2.2632	3.69055	4.48847	4.4759	4.5202	4.34088	3.81173
ZGPAT	1.33587	0.00133498	0.0159232	6.76476	5.42889	8.75527	6.98101	5.78663	6.80617	7.28761	5.92595	8.26269	5.70654	5.79393	6.34178	5.83683	5.12223	5.57906	4.50002	5.48752	6.1426	5.81095	5.90748	4.58312	5.31909
ZHX1-C8orf76	1.68149	3.07691e-08	8.7253e-06	5.18001	3.49853	5.1167	4.84497	5.84208	4.66951	5.66526	5.0393	4.84869	4.98347	5.15211	5.63803	4.02016	4.12629	3.72914	2.44663	3.29695	3.25299	3.44213	3.99104	3.27917	3.40075
ZIC1	2.97954	0.0066422	0.0492725	6.18332	3.20378	10.3486	3.99763	2.36391	7.76071	2.23119	8.28131	9.64341	7.6738	7.24764	2.28495	3.39385	2.21194	2.0934	3.99033	3.88523	2.66981	5.87215	2.9069	2.41171	2.60247
ZKSCAN4	0.766305	0.000380294	0.00661555	5.14847	4.38217	5.06144	5.67135	5.28341	4.55189	5.36731	4.68064	5.61236	5.1154	5.07096	5.07	4.15196	4.95674	4.58904	4.36502	4.37838	4.37216	4.55145	3.7624	5.06683	3.62773
ZMIZ1	0.709062	0.0215849	0.110572	9.79971	9.09065	10.3934	8.36695	9.15275	9.99938	8.65765	10.7295	9.74307	10.3768	9.72683	10.8508	8.89488	8.66388	8.75527	9.86983	9.01041	8.58455	9.07669	9.00594	9.66932	9.37576
ZMPSTE24	0.699748	0.0255727	0.123902	8.76509	8.06534	8.27985	8.15403	9.18776	8.42547	8.70566	9.91593	7.81559	9.13301	9.09009	8.9435	7.32285	8.71375	8.9212	6.50816	7.81965	8.69669	8.54846	7.93977	7.77987	8.40301
ZMYM1	1.56477	0.00309255	0.0287355	6.87937	5.31461	7.16745	5.78627	6.9607	6.35753	5.75754	7.53329	7.20058	8.95435	6.99152	6.08452	4.58312	5.96072	5.496	2.25009	6.54292	5.27222	5.32123	6.08605	6.57645	5.0573
ZNF107	0.594148	0.0293056	0.135778	4.66355	4.0694	4.44337	4.39042	5.01551	5.05588	5.05655	4.70556	4.03234	4.60711	5.34463	3.98411	3.4433	4.33068	4.25188	2.46813	4.5348	3.68187	4.27236	4.72806	4.79781	4.1851
ZNF117	1.03145	0.0150345	0.0862801	4.16248	3.13103	6.69016	2.83259	4.24093	3.36517	4.22507	4.06673	3.1804	5.09918	3.08979	4.83477	3.35037	2.40951	3.11856	2.22215	3.83949	2.54892	3.54876	3.97736	3.25912	3.03608
ZNF133	1.20628	0.00605034	0.0461517	7.14794	5.94166	8.40594	5.76232	7.61495	6.444	5.66221	7.00475	8.40301	8.05768	6.78377	7.34072	6.39042	5.9095	5.45879	3.85255	6.79325	6.19991	6.07061	6.26714	6.93195	5.54248
ZNF142	0.676645	0.00446873	0.0372659	6.32505	5.64841	5.96589	5.68524	6.85136	6.00294	6.28321	5.94645	7.02563	6.35918	5.79972	7.33093	5.28791	5.05218	5.3166	6.49416	5.8613	5.58796	5.48505	5.87145	5.75376	5.7737
ZNF16	0.94311	0.000159541	0.00350892	6.13543	5.19232	5.34848	6.69599	6.23132	5.19749	6.38599	6.89107	6.09942	5.47625	6.65853	6.36975	4.91112	4.7819	5.41619	5.57744	5.32954	5.10208	5.08133	5.02578	5.01988	5.67793
ZNF212	0.841192	0.000418806	0.00708466	6.38405	5.54285	7.11626	6.80695	6.44448	5.74128	6.24343	6.29579	6.75612	6.42202	5.87563	6.1385	5.37121	5.82002	5.76016	4.62629	5.89937	5.59969	4.92693	6.12749	6.05126	5.24611
ZNF239	1.03371	0.000887393	0.0119546	6.46005	5.42633	6.30557	6.39768	6.82929	6.82803	5.70287	7.48744	6.2052	6.14913	5.3945	7.30078	5.73516	5.03019	5.28509	5.03969	6.31137	4.44682	6.11263	4.88902	5.61075	5.80263
ZNF250	1.48837	2.0496e-05	0.00077277	6.12777	4.6394	6.46319	7.39006	6.66724	5.31083	5.07596	6.11128	6.17559	5.7053	7.175	5.20327	3.70794	4.68944	4.84826	4.54263	5.20537	4.74037	4.45904	4.94375	4.78773	4.46951
ZNF256	1.14587	0.000418377	0.00708415	3.97765	2.83178	4.71034	5.02704	3.17695	3.40128	4.91388	4.18981	2.75806	3.99844	3.97957	3.62119	2.6673	3.0627	2.676	1.73855	3.58892	2.69105	3.40349	2.99223	2.72759	2.77
ZNF257	1.01541	0.000183254	0.00387315	3.03541	2.02001	2.13515	1.98369	3.49388	2.27284	3.77608	3.91391	3.46175	3.12669	2.70056	3.48958	2.23119	1.98197	2.08786	2.01152	2.20917	1.9424	2.24927	1.98238	1.79562	1.70871
ZNF260	1.20459	0.0227994	0.114842	6.84176	5.63717	6.98468	5.78082	6.61233	7.60371	6.75345	7.21444	6.40624	8.30936	7.44478	5.30784	4.73378	6.52203	6.07113	1.89653	6.2545	6.12443	6.34642	6.12875	6.09834	6.1958
ZNF282	0.796569	0.000964037	0.0126893	5.9822	5.18563	6.37356	6.75177	5.95913	6.37834	6.25249	5.90254	5.74988	5.94645	4.88993	5.61794	4.61859	5.30677	5.61836	5.86386	5.03354	5.39931	5.42442	5.31491	4.69345	4.58312
ZNF34	0.688139	0.00950472	0.0633126	4.77983	4.09169	4.61922	5.86685	5.05112	3.5891	4.57631	5.22685	4.98388	4.31502	4.9178	4.65215	4.91038	3.76383	3.74009	3.80777	3.67235	4.2643	3.44414	3.94439	4.46792	4.90173
ZNF467	0.90359	6.51246e-05	0.00181371	5.38028	4.47669	4.75946	4.91495	5.1173	5.70932	5.85547	5.36884	5.86006	5.04061	4.81634	6.36046	4.39277	4.17296	4.51718	4.46146	4.36582	4.29684	4.5441	4.3529	4.83243	4.83047
ZNF492	0.958319	0.00038223	0.00662978	3.81841	2.86009	2.87962	3.3435	4.22836	3.61368	4.46792	3.82246	4.12856	3.47426	3.87489	4.3508	2.49568	2.86264	2.33814	3.5701	2.52013	2.39309	3.93958	3.16121	2.92981	2.39048
ZNF496	0.588618	0.00331019	0.0301475	3.403	2.81438	4.26265	2.84765	3.12472	3.89874	2.85742	3.51705	2.90422	3.53057	3.17177	3.91517	3.07472	2.85271	3.09376	2.90453	3.25535	2.65841	2.4683	2.67349	2.52774	2.63478
ZNF512B	0.706884	0.00144883	0.0168079	4.09433	3.38745	4.08748	4.67372	3.70018	3.56831	4.59248	3.93749	3.92953	4.31782	3.73524	4.40108	4.28177	2.94237	3.24281	2.545	3.22623	3.62198	3.29924	3.23495	3.89664	3.58351
ZNF519	1.07136	2.4226e-05	0.000879847	3.88187	2.81051	3.52284	4.28561	4.94659	3.59576	3.95304	3.99434	3.19112	3.42244	4.35972	3.54724	3.21352	3.3678	2.81468	2.20571	2.53358	3.05668	2.39574	2.78756	2.80418	2.92561
ZNF551	0.736596	0.0152168	0.0869265	3.71738	2.98078	4.15944	4.43241	3.55447	2.81768	4.1373	2.34901	3.45685	4.43992	4.64734	3.17937	3.49912	3.67458	3.08644	2.15213	2.53989	3.31029	2.57397	2.66707	2.77282	3.53153
ZNF581	1.02748	0.000871641	0.0118204	6.38582	5.35835	6.33284	7.47341	6.25882	5.61423	6.73985	6.69928	7.03979	5.99409	5.37823	6.32771	4.97357	5.53915	5.818	3.8898	5.59179	5.03639	5.89964	5.55983	5.8582	5.41709
ZNF585A	1.09394	0.0108864	0.068969	4.51171	3.41777	6.33034	4.84869	3.17382	3.73978	3.46817	5.93579	6.25557	3.30176	3.25085	4.81234	3.21468	3.62402	3.52612	3.27802	3.76718	3.55324	3.08607	3.23426	3.63386	3.2603
ZNF592	0.651738	0.0352344	0.153835	6.15254	5.5008	6.89412	5.60709	6.7119	5.64349	6.25706	6.14217	6.69064	6.05196	5.00811	6.51888	5.64349	5.29843	5.14471	7.47523	5.20404	4.60736	5.33715	5.42992	5.15731	5.71041
ZNF623	1.27735	0.000273269	0.00518453	6.9735	5.69615	6.89474	7.41798	7.41798	7.29077	6.32921	6.94613	6.58119	6.46139	7.21223	7.1834	5.35655	5.62172	5.94105	3.42816	5.92354	5.9543	5.89343	6.87861	6.1338	5.83036
ZNF692	0.751842	0.0207831	0.10783	6.6632	5.91136	7.25757	6.67973	6.13662	6.15993	6.49587	5.59722	8.67534	6.80406	5.81216	7.01347	6.60927	5.33964	5.46621	6.751	5.7108	5.76232	5.98823	6.20834	5.78399	5.49376
ZNF696	1.06475	5.99727e-05	0.00171037	6.24067	5.17592	5.73138	6.75925	6.14964	5.98483	6.16158	5.82997	6.67217	6.60522	6.29368	6.219	3.93358	4.974	5.37625	5.20198	5.59179	4.81887	5.69116	5.31118	6.0939	4.76655
ZNF767P	0.920849	0.00016014	0.00350966	6.9171	5.99625	6.59902	6.40882	6.84998	7.10156	7.34916	7.98814	7.14813	6.64794	6.04164	7.03662	5.49677	6.03466	5.85676	5.4057	6.35975	6.36816	5.82002	6.46676	6.0359	6.11807
ZNF777	1.00588	0.000337159	0.00605458	6.27857	5.27269	6.22874	6.56124	6.43593	6.65616	6.86827	6.17183	6.56788	5.33998	5.04961	6.90604	5.15879	5.06737	5.49401	4.28437	5.49946	5.12846	5.96151	4.99446	5.6286	5.50981
ZNF783	0.984329	0.00558244	0.0435724	8.24164	7.25731	8.71925	8.305	8.32817	7.24623	8.38519	9.10335	7.81184	8.69749	6.95829	8.86162	7.56897	6.64727	6.61233	9.24012	7.26577	6.7003	6.5571	7.14339	7.20647	7.63143
ZNF836	0.590746	1.04409e-05	0.000468026	4.50722	3.91647	4.40734	4.39825	4.83586	4.392	4.57723	4.89842	4.20293	4.32404	4.26802	4.76808	3.81258	3.95279	3.99727	4.10808	3.95681	3.98194	3.70379	3.87119	4.02535	3.7549
ZNHIT1	0.660986	0.0121379	0.0746651	7.1609	6.49992	7.01347	7.91759	7.02274	7.3475	7.88384	6.36922	7.63208	5.96025	6.84738	7.61495	6.47298	6.72375	6.70986	5.75754	6.93754	6.62746	5.58408	6.58927	6.79387	6.8028
ZNRD1	0.600445	0.0262758	0.126012	6.37584	5.77539	6.514	6.93265	6.77007	6.02532	6.96364	5.05268	7.12271	5.69232	5.42527	7.25972	6.2285	5.61236	5.74336	5.5387	5.58375	5.94105	5.7672	5.47826	5.55983	6.30092
ZSCAN16	1.11158	0.00356238	0.0316822	6.11133	4.99975	6.03215	6.19486	6.57975	5.4139	7.08377	5.832	6.34024	6.12812	5.74226	5.76625	4.58066	5.50401	5.53047	2.2632	4.99094	5.69591	5.35892	5.71725	5.41475	4.94139
ZSCAN26	0.703415	0.0106539	0.0678588	6.07151	5.36809	5.96196	5.54944	6.0886	5.21981	6.01343	6.02294	6.62942	6.81896	5.67827	6.73225	4.61076	5.60675	5.54667	4.07107	5.40142	5.78933	6.1343	6.05916	5.40418	5.0573
ZSCAN31	0.87663	0.0341097	0.150194	4.81516	3.93853	5.67463	5.59112	4.99946	3.76082	5.54109	3.75615	3.87261	5.25824	6.18889	3.50858	3.40004	4.80066	5.18993	4.13606	4.78652	4.3562	3.24626	2.73717	3.73465	2.99779
ZSCAN9	0.672084	0.0196208	0.103489	6.02937	5.35729	6.11106	5.98207	6.37506	5.55695	5.4442	5.62711	7.4249	6.00878	4.78283	6.98078	4.8458	4.94235	5.64974	4.85032	6.06344	5.54741	5.19072	5.87117	5.53558	5.07637
ZWILCH	1.1369	0.000232638	0.00463566	5.84554	4.70864	5.48984	6.0645	6.11333	6.54746	6.23551	5.25201	5.27913	5.62427	5.9839	5.86546	5.00307	5.37074	4.72193	2.68515	4.8771	4.9718	4.84384	4.9498	4.84238	4.82057
ZWINT	3.52601	1.17817e-07	2.05917e-05	8.677	5.15099	8.72061	9.03489	8.55157	9.5768	9.04266	8.30772	8.51499	8.83964	8.80543	7.37569	4.35583	6.61106	6.05196	1.89653	6.62942	4.88646	5.85794	4.42014	5.16543	5.63517
ZYX	0.621428	0.0159283	0.0895611	5.39476	4.77333	6.0907	6.57102	5.22352	5.03232	5.02128	5.96547	5.48109	4.45643	4.61596	5.48984	4.45405	4.29133	4.63752	5.2065	4.41384	4.93429	4.60114	4.63074	4.96961	5.59433

## Sheet: down_HGSOC_vs_normal
#log2FC <= -0.585 #p-value cut-off <= 0.05 #q-value cut-off <= 1.00 #Condition pair: down_HGSOC_vs_normal
Group.1	log2FC	p_value	q_value	HGSOC	normal	GSM1701025	GSM1701026	GSM1701027	GSM1701028	GSM1701029	GSM1701030	GSM1701031	GSM1701032	GSM1701033	GSM1701034	GSM1701035	GSM1701036	GSM1701037	GSM1701038	GSM1701039	GSM1701040	GSM1701041	GSM1701042	GSM1701043	GSM1701044
A2M	-0.701158	0.000445059	0.00744386	5.7219	6.42306	5.72862	5.8772	5.44515	5.78047	5.17798	6.38322	6.15454	5.42527	5.48068	5.7659	6.43091	5.64935	6.40338	6.47343	5.98785	6.50962	6.25927	6.69064	6.98874	6.83741
AASS	-1.19967	0.00956172	0.0635164	3.83723	5.03691	3.84442	3.72914	3.06053	4.2184	4.81012	2.31622	2.16712	3.60871	4.49527	6.12239	6.09834	5.1201	3.99268	5.02219	5.30616	4.47491	3.6445	5.39578	5.85747	5.45693
ABCA11P	-1.05295	0.00638575	0.0478085	4.71294	5.76589	5.02298	5.71134	4.31696	4.02321	5.48886	5.15193	3.40275	4.36911	3.95868	5.68362	5.36731	5.5933	5.41619	4.29397	7.02823	5.94827	6.61837	5.75968	6.67973	4.95387
ABCA13	-1.07183	0.000116845	0.00277722	1.85358	2.92541	1.83314	1.76206	1.91956	2.05381	1.63296	2.38894	1.54308	1.86779	1.822	1.71247	1.97543	3.46553	3.15209	1.78154	2.75833	3.6751	3.94817	3.19134	2.81964	2.48697
ABCA5	-1.59899	0.000385521	0.00667386	6.34615	7.94515	7.49711	5.61009	5.74988	5.54799	6.61672	5.07854	5.97845	8.11786	6.9957	6.26918	8.21195	7.74257	7.01135	6.65972	8.27675	8.6606	8.09978	9.1741	8.66885	6.94579
ABCA7	-0.946026	0.00382917	0.0332303	3.56563	4.51166	4.59859	3.52928	3.28737	3.01674	3.14776	3.88592	3.58783	3.62879	3.54764	3.42641	3.66783	3.70849	4.55323	6.40699	4.09878	4.29842	5.06965	5.31799	3.89664	4.09857
ABCA8	-1.53999	1.12099e-06	9.49688e-05	2.57529	4.11528	2.44713	2.32837	1.99861	2.25052	2.28952	2.5506	2.71358	2.86371	3.77287	2.53795	4.83073	3.31538	3.46992	3.25508	4.48495	4.14447	4.2526	4.62475	4.38724	4.38771
ABCD3	-0.725119	6.96362e-05	0.00189777	5.60518	6.3303	5.82764	5.33888	5.70893	5.41607	5.70044	6.0562	4.83393	5.60459	6.18137	5.38375	6.22229	6.13291	6.44613	6.64945	5.96869	6.05897	6.64945	6.40443	6.44539	6.32529
ABHD2	-0.812571	0.00102137	0.0131903	4.85308	5.66565	4.8268	5.09036	4.57873	5.41087	5.41137	3.7582	4.65471	4.54572	4.7019	5.55211	5.21566	5.11892	5.57782	6.30499	5.88452	5.72102	6.3044	5.90699	5.15161	5.47054
ABI3BP	-1.05778	0.0255346	0.123842	3.52	4.57778	3.79625	2.37306	2.92868	2.92929	2.8839	2.59021	2.69404	2.839	5.67585	6.48971	4.68401	4.91182	3.90019	3.98268	5.06307	4.45275	4.62832	4.12679	5.14574	4.8824
ABR	-0.955343	0.000174404	0.00374843	4.4778	5.43314	4.9448	3.94958	4.53094	4.65951	4.02825	5.04821	4.46095	4.28952	4.50039	4.36582	5.18343	4.90115	5.17591	6.9095	5.75869	5.51903	5.39578	5.34256	4.84329	5.30205
AC068039.4	-0.667586	0.0188927	0.100784	3.47633	4.14392	3.28302	3.79603	2.92832	3.42062	3.87379	3.75225	3.54539	3.26713	3.37559	3.52116	4.53329	3.70075	3.43957	6.21069	4.18076	4.05244	3.41986	3.56849	4.33869	3.99464
ACKR1	-0.749067	0.0127933	0.0772783	3.78019	4.52926	4.06831	3.79846	4.12744	3.27038	3.0251	3.65262	4.7527	3.78127	3.25492	4.07071	4.79954	3.86733	3.99575	6.37101	3.99955	4.7776	3.83064	4.68509	4.26585	4.70022
ACKR4	-3.29443	4.44919e-08	1.18176e-05	2.53222	5.82665	2.67208	2.23293	2.18836	2.51741	2.46361	2.51836	3.16946	2.40492	2.4568	2.69831	6.34568	5.67856	4.96879	4.02209	6.07215	7.42136	5.99692	7.83476	6.13979	3.78645
ACSBG1	-1.09094	8.72414e-06	0.000414013	2.84426	3.93519	2.79661	3.04029	2.86468	2.95684	3.00869	2.72784	2.72848	2.97476	2.80613	2.53826	3.94455	3.56897	3.97677	3.93024	3.63236	4.72735	4.53022	4.67464	3.44442	2.92239
ACSL5	-2.27086	2.00298e-07	2.95458e-05	5.33505	7.60591	4.28495	4.85299	6.83137	3.90072	5.4715	5.49527	5.51251	4.92373	5.47977	6.59769	7.40923	7.393	7.8492	8.51643	7.64382	7.25615	7.77021	7.14552	7.29166	7.78387
ACTA2	-0.785764	0.00745565	0.0535097	5.32764	6.1134	5.92191	4.39592	3.99521	6.67539	5.39103	5.6694	5.3478	5.40036	4.91863	5.56072	6.42291	6.42461	6.15959	6.34905	5.45621	6.39334	5.14899	6.13943	6.30557	6.33431
ACTG1P4	-2.20039	0.00092341	0.0123278	9.00954	11.2099	5.98656	11.3932	10.6666	6.87925	11.2632	9.26242	7.393	10.1037	8.38822	8.75936	11.6435	11.5163	11.1458	10.4331	11.5524	11.6876	11.1191	11.4207	11.2458	10.3352
ACYP2	-0.744913	0.0165286	0.0920637	5.10037	5.84529	5.46588	4.84984	6.21662	4.59975	3.52896	5.55114	5.60872	5.22478	5.4076	4.55045	5.79552	6.3435	6.36858	4.31248	5.69951	6.16713	6.04485	5.95603	6.00924	5.75605
ADAM28	-1.68088	0.000749254	0.010633	4.72014	6.40102	4.33496	3.19891	5.93003	3.6696	3.2904	6.88766	5.48425	5.16448	5.54035	3.70075	7.89437	5.90615	6.35007	5.54297	6.52918	6.22369	5.87172	5.90157	6.88813	6.90239
ADAMTS1	-1.77207	0.000107703	0.00260066	6.78004	8.55211	8.32817	7.56495	5.42992	6.37942	7.22902	6.90239	6.14065	5.13866	7.45084	7.2364	8.63602	7.10816	7.48679	9.05741	9.07901	8.79886	8.0245	9.11497	9.27645	8.93894
ADARB2	-1.21779	3.7406e-05	0.00121032	2.74246	3.96025	2.29655	2.66424	3.00226	2.40272	2.69065	3.38923	3.18083	2.52123	2.34262	2.9343	3.99104	3.03661	3.79625	3.87101	5.21981	4.10107	4.89704	3.2562	3.90465	3.52883
ADCY2	-0.828763	4.77259e-05	0.00145242	3.12379	3.95255	2.78814	2.75806	3.1556	3.6682	2.87328	3.42641	3.06023	2.8275	3.30443	3.37601	3.99002	3.33856	3.86763	3.62119	4.54116	4.40783	4.20874	4.30443	3.69287	3.55304
ADCY8	-1.35054	0.0103095	0.0664194	3.44823	4.79877	4.52038	3.12975	4.77646	3.3049	2.71117	2.69557	2.72503	4.28019	2.66479	3.67411	5.71389	4.61922	3.31141	3.74732	5.98823	2.68674	5.79527	3.49958	6.61383	6.01222
ADCY9	-0.628405	1.51904e-05	0.00062576	4.42356	5.05197	4.32146	4.11654	4.67345	4.46436	4.51261	4.40137	4.50993	4.02321	4.37279	4.83995	5.13866	4.99203	4.85167	4.81958	5.22883	5.4117	5.26214	5.11507	4.86384	4.83618
ADD3	-0.76168	0.0109492	0.0692682	8.18778	8.94946	7.36943	8.12403	8.04147	8.05684	7.69164	8.17007	8.04944	8.75171	8.95435	8.66885	9.01803	9.08272	9.20397	6.88325	9.1599	9.58098	8.91397	9.29847	8.84398	9.50935
ADGB	-5.63283	2.68163e-09	1.51232e-06	2.2374	7.87024	2.02834	4.04333	2.07332	1.80046	1.74809	2.19902	2.46549	2.09582	1.96958	1.9506	8.68707	7.76593	7.62082	4.81328	9.18776	9.55996	8.26148	9.85534	8.35355	4.59719
ADH1B	-0.998594	0.000754247	0.0106916	2.12713	3.12572	1.97269	2.08678	2.10811	2.10644	2.32143	2.08386	2.19108	2.01887	2.21138	2.17066	2.85339	2.48788	2.37596	2.78814	3.54188	3.13331	2.27628	5.13866	3.23403	3.42771
ADH4	-0.772517	0.00945731	0.0631179	4.62451	5.39703	4.37716	3.87435	4.43717	4.53114	5.17302	4.51079	4.74776	4.82389	4.51016	5.25967	5.0424	4.50828	4.81118	7.46623	5.63361	5.16874	5.355	5.26679	5.58375	5.1343
ADH6	-1.48247	7.23179e-05	0.00194349	2.75844	4.24091	2.90325	3.05154	2.52223	3.00167	2.69105	2.54744	2.47955	2.66932	2.85151	2.86683	3.67843	4.35583	4.35	2.76139	4.44337	5.87117	5.01211	5.11574	4.00118	2.81992
ADNP2	-0.710394	0.00377498	0.0328799	6.40826	7.11865	5.91368	6.84472	6.73526	6.84675	6.67661	6.53673	6.11751	6.37777	5.84798	6.18556	7.8658	6.87202	6.89474	8.21066	6.88325	6.38057	6.75849	6.65579	6.89107	7.7741
ADRB2	-1.8531	5.41764e-05	0.00159792	3.06506	4.91817	2.84168	2.66424	3.90915	4.03311	2.31901	2.90203	2.81468	3.11007	3.1064	2.95025	5.59372	4.65512	4.63343	2.40444	4.69493	6.14434	6.40882	5.40621	4.67594	4.5647
ADRBK2	-0.689696	0.0355849	0.154947	5.25351	5.9432	4.1172	4.77095	5.00955	5.713	7.04887	4.76376	5.5901	5.15833	4.64117	5.72217	5.97461	5.89574	6.36398	4.44524	6.85351	6.2052	5.72776	6.22005	5.85676	5.88918
AEN	-1.02367	0.000369269	0.00648077	5.99407	7.01774	5.76818	5.64431	6.18427	6.60927	6.47828	6.35864	5.69207	5.78714	4.7776	6.64093	7.15908	7.20295	7.18159	8.25637	6.37263	6.92554	6.4029	6.50434	7.07213	7.09985
AF007147	-0.710359	0.00103744	0.0133206	4.21379	4.92415	3.69977	4.0936	4.97709	4.15376	3.52896	3.85509	4.61076	4.45611	4.47179	4.29101	5.09082	4.79442	4.73221	5.76861	4.73328	4.4432	4.43493	4.82719	5.14196	5.2749
AF070581	-1.3825	1.28437e-05	0.000546811	2.51931	3.90181	2.46755	2.23647	3.14223	2.51059	1.95761	2.83309	2.31913	2.8459	2.09665	2.78393	4.56869	3.61171	4.05311	2.37148	4.35948	3.55595	4.21576	3.42868	3.96466	4.88859
AFF1	-0.700976	0.00083242	0.0113864	4.9319	5.63288	4.54378	5.13734	4.91388	5.03867	4.95467	4.86856	4.77902	5.08577	4.85032	5.14703	5.63641	5.28955	5.28449	7.08121	5.89152	5.46502	5.24079	5.48934	5.41785	5.53262
AGBL2	-4.70064	3.52538e-08	9.65196e-06	5.13598	9.83662	5.53504	5.39578	4.88369	3.70915	4.1387	7.29985	4.49847	7.35865	4.83694	3.70354	9.62885	9.97602	9.85534	7.98572	10.6386	11.3482	9.95298	11.5524	10.2069	7.2212
AGPAT5	-0.883548	0.0198992	0.104431	6.20716	7.09071	6.1848	5.49629	7.21365	6.38272	5.42201	6.81626	6.27341	5.97102	8.14347	4.16796	6.46603	7.50827	7.4888	6.36199	6.9082	7.37173	7.78036	7.08192	7.10546	6.8343
AGR2	-4.94105	1.99019e-09	1.31956e-06	4.15765	9.09869	3.41193	3.76833	4.08877	6.96864	3.52896	5.20932	4.11428	2.50427	5.06307	2.91891	8.46889	9.80383	9.6187	7.60001	9.87429	9.85534	10.6081	9.24953	8.30631	7.60196
AHI1	-0.66677	2.13818e-05	0.000801074	4.68964	5.35641	4.50412	4.65557	4.58421	4.64458	4.50828	4.7019	5.03232	5.13145	4.71654	4.4174	5.24523	5.06376	5.01377	5.89343	5.50946	5.15691	5.14314	5.51528	5.57823	5.44487
AIM1	-1.81681	0.000162296	0.00354272	6.06423	7.88104	5.35613	6.14913	7.85815	5.2861	6.13979	5.95152	4.30376	7.08156	7.59883	4.91734	7.74405	8.56442	8.13804	6.60607	7.79847	7.80589	8.40432	7.02922	8.0705	8.64943
AJ011981	-0.714834	0.000168197	0.00365029	3.59391	4.30875	3.38026	3.78309	3.64712	3.65658	3.38069	3.72181	3.49912	3.93627	3.39759	3.53658	4.52299	4.94645	4.56585	4.82412	3.55983	4.00147	3.6991	4.44599	4.26585	4.25581
AK055458	-0.909722	0.0209462	0.108455	3.93357	4.84329	3.69464	3.85509	3.55827	3.89285	3.57114	3.87992	5.2012	3.50106	4.6563	3.52523	4.81887	4.55727	3.76686	7.47416	4.54572	5.18309	3.55845	5.40874	4.80676	4.313
AK1	-1.7171	1.46397e-07	2.39017e-05	5.38741	7.10452	5.8097	5.63287	4.94311	5.51166	5.73516	5.64779	5.69591	5.01211	4.80298	5.08283	6.24026	6.99201	7.57977	7.45786	7.60907	7.52926	7.08432	7.87658	6.57577	6.10025
AK7	-0.852545	8.05599e-05	0.00211141	3.14534	3.99788	3.00226	3.81173	2.96113	2.93353	3.015	3.32888	3.14192	3.09426	3.25646	2.90824	4.3228	4.11189	4.10729	3.063	3.93796	4.24147	4.62552	4.37625	3.90529	3.28737
AK9	-0.610172	0.0383134	0.16296	3.43528	4.04545	3.7095	3.60125	3.36444	2.86737	3.63633	2.90241	3.76552	3.30515	3.84305	3.35775	3.74098	4.57328	4.48552	2.7811	5.07096	5.33888	3.45506	4.31782	3.66248	3.02841
AKAP11	-0.822554	0.000107044	0.00259409	4.86964	5.6922	4.00019	4.82218	5.51049	5.07755	4.2471	5.07879	5.3843	4.78171	5.30253	4.49159	5.65321	6.06494	5.73612	5.4688	5.6676	5.64232	5.82612	5.46266	6.01807	5.38212
AKR1C3	-3.12909	2.97943e-06	0.000187357	5.40422	8.53331	6.99825	4.25276	4.59399	3.49188	6.32056	4.31263	5.30748	6.78975	5.11574	6.85918	8.73399	7.62756	9.49688	6.33182	9.70497	9.61456	9.49688	8.3953	7.76892	8.16223
AKT3	-0.694947	0.0123083	0.0752454	3.86017	4.55512	3.71126	3.60457	3.30282	3.93523	3.48383	4.12645	3.26291	3.90636	5.56398	3.7043	4.97036	4.63343	4.44443	3.2884	4.76312	4.57089	4.19514	4.68749	5.1201	4.87783
ALCAM	-1.44608	0.00364669	0.032127	5.52246	6.96854	5.21213	7.04257	5.32458	7.08646	7.37996	5.85009	3.55595	4.21493	5.66128	3.89664	7.15985	7.49711	7.11917	5.791	7.48982	7.05872	7.70555	6.9957	6.70513	6.16339
ALDH1A1	-3.13301	5.36051e-09	2.54222e-06	3.28055	6.41356	3.96915	3.02071	2.65897	3.28011	2.56119	2.2878	4.13688	3.36227	5.26214	2.26627	5.27949	7.14339	7.10236	6.70112	5.791	6.29936	6.62186	6.28573	6.64352	6.26773
ALDH1A2	-1.84697	1.43615e-08	4.7329e-06	4.32002	6.16699	4.79118	3.5634	4.44367	3.77466	4.62945	5.10169	4.50412	3.86848	3.55729	4.96625	6.10269	6.11128	6.09942	6.90786	6.12986	5.85621	5.72031	6.12093	6.07113	6.55019
ALDH1A3	-1.02548	6.84004e-05	0.00187558	4.42929	5.45477	4.69568	4.12768	4.86177	4.45118	4.45275	5.09731	4.53711	3.16547	4.30049	4.60346	5.2591	5.62735	4.89287	6.33621	4.94506	5.76861	5.39367	5.37242	5.69298	5.25938
ALG13	-0.962543	0.000159278	0.00350892	5.32197	6.28451	4.81093	4.86097	5.85009	5.31949	6.06668	6.30899	4.73735	5.71822	4.90082	4.64615	6.5571	5.81339	6.23981	5.80344	6.69548	6.26625	6.44572	6.25773	6.27966	6.48656
ALMS1	-0.59247	0.0286448	0.133796	7.61231	8.20478	7.41011	6.38634	7.19986	7.76593	6.87479	7.73883	8.09143	8.80843	7.31955	8.52788	8.56816	7.73699	7.77591	8.6251	8.27446	8.53382	8.37644	8.54226	7.98425	7.63044
ALMS1P	-0.719912	0.00201598	0.0212731	5.18286	5.90277	4.51718	4.70396	5.43141	5.08577	5.57052	4.90396	4.93563	6.46523	4.8107	5.40418	5.59433	5.81753	5.45003	5.79811	6.33431	6.18137	6.14312	6.08908	6.25249	5.36731
ALPK1	-0.919291	0.0198164	0.104181	5.25067	6.16996	4.94953	4.46587	4.99999	5.21425	5.53365	5.05684	5.19662	5.79418	5.36978	5.92595	6.8264	5.17442	5.31424	9.13034	6.14594	5.74956	5.55211	5.81179	5.74505	6.24972
AMIGO2	-2.47142	6.23467e-05	0.00175004	6.35421	8.82563	6.08006	5.22382	6.05815	6.95547	6.92385	7.6505	4.8351	6.54693	8.54846	4.71977	8.45066	9.26435	9.54597	5.88283	9.09429	9.11957	9.67717	9.27421	9.64576	8.30146
AMPD3	-1.16437	9.03496e-07	8.24544e-05	4.81237	5.97674	4.2548	4.61279	5.2302	4.7971	4.55402	5.20436	4.33633	5.46957	5.03723	4.62734	5.73178	6.06859	5.5927	5.7525	6.41998	6.43749	5.91264	6.48656	5.6553	5.70984
AMT	-0.768184	0.00744451	0.0535097	6.75801	7.5262	6.97927	6.47419	6.62746	6.23038	6.05716	7.05499	7.46294	7.28761	5.84711	7.55904	8.57393	7.18231	7.38345	6.28647	7.42773	7.75574	7.15053	7.85049	8.04486	7.60648
ANK3	-0.797546	0.00496035	0.0404557	6.66378	7.46133	5.4399	5.79024	6.97395	6.22734	6.84551	7.01775	6.72445	7.44573	6.60069	7.57229	7.75172	7.47996	7.41099	6.43801	7.88502	7.83769	7.0608	7.99335	7.74155	7.01419
ANKFN1	-2.36421	1.54426e-08	4.99665e-06	2.67948	5.04369	2.50242	2.72487	2.52101	2.52624	2.20846	3.23881	2.42492	2.83037	3.07679	2.74088	5.03809	4.70157	4.84804	5.56177	4.41797	6.10804	5.79327	5.59747	5.1409	3.22975
ANKMY2	-1.30338	0.00174425	0.0191367	5.94926	7.25264	4.974	6.55412	6.65748	6.20713	4.72886	5.04061	6.10179	5.61867	7.61408	5.99586	6.42461	7.66012	7.73786	5.61056	7.70593	7.65545	8.58597	7.41798	6.87981	6.84812
ANKRD12	-0.658399	0.0116346	0.0721932	6.29501	6.95341	6.8343	6.23038	7.05499	5.83852	5.85392	6.19254	6.4572	6.1402	6.2842	6.06387	7.45084	6.68215	6.71668	5.37894	6.85976	7.01199	6.92059	7.52828	7.90734	7.07755
ANKRD32	-0.737429	0.0144806	0.0842555	3.26771	4.00514	2.88533	3.41122	3.07247	3.66747	2.12422	3.23256	4.02439	3.41141	3.3047	3.5433	3.81803	4.12976	4.01759	2.06688	4.32581	4.01608	4.60286	4.72844	4.61313	3.73279
ANKRD36BP2	-1.13726	0.00598703	0.04584	3.79005	4.92732	4.96396	3.48958	3.34678	3.15254	2.98193	3.92345	4.45611	3.53863	3.29851	4.74903	5.14899	5.5149	5.28	2.63269	5.22825	5.82262	5.45103	5.77434	4.88576	3.53461
ANKRD65	-0.623894	0.0232198	0.116254	5.95572	6.57962	6.31406	5.37051	5.55895	4.70934	5.26499	7.0064	6.07567	6.93754	6.14712	6.17262	6.36334	6.61427	6.47604	6.5458	6.50327	7.24398	6.76685	6.92891	6.70395	5.64974
ANO1	-0.636705	0.0100677	0.0654843	4.29727	4.93397	4.93533	4.45238	4.53133	4.18582	3.13972	4.76544	4.04775	4.84329	4.35312	3.71851	4.91819	5.63857	4.88125	5.32764	4.97887	4.50624	4.6889	4.30734	5.68223	4.41051
ANXA1	-1.63255	0.00250476	0.0247775	8.79293	10.4255	8.70203	11.5524	9.72683	8.76752	8.4404	10.6299	7.86756	5.80344	8.40301	8.03619	10.7133	10.1793	10.7747	10.3989	9.97602	10.5464	10.5923	10.0974	10.3596	10.6168
ANXA13	-3.59213	1.52734e-05	0.000627728	3.41721	7.00934	2.73177	2.30205	3.97501	3.54695	2.81964	5.21885	3.41059	4.10495	3.06154	3.00075	6.65671	7.57229	8.81566	2.41366	8.03406	8.72798	8.2511	8.0258	6.75925	4.83694
ANXA4	-1.41048	0.00115006	0.0143122	7.84963	9.26012	8.44928	7.63994	8.64943	7.02454	7.20704	9.62885	7.03233	7.53522	7.00542	8.32427	9.25445	9.35336	10.2232	7.16968	9.29065	10.2162	9.9098	9.60661	8.65913	8.91808
ANXA5	-1.43998	4.4176e-07	4.9939e-05	8.50307	9.94305	8.5981	8.62095	8.12252	8.98228	8.01739	8.78529	9.23083	7.61197	8.41723	8.64419	9.88683	10.7295	10.4053	9.1764	9.79287	10.1436	9.96042	9.90138	9.47383	9.96042
ANXA7	-0.725675	0.00457134	0.0379041	7.56521	8.29089	6.99363	7.9209	7.558	7.76717	6.55849	8.32201	6.73474	7.43203	8.42941	7.93572	8.14711	8.01991	8.16815	8.32201	8.11786	8.50243	9.20643	8.1949	7.74014	8.48992
ANXA8	-0.656881	0.00675023	0.049742	4.26249	4.91937	3.93713	3.72465	5.16512	4.62868	3.89839	4.48613	4.50624	4.22947	4.22261	3.82646	5.45103	4.49925	5.45409	4.95674	5.19901	5.13734	5.15017	5.34429	3.93289	4.06885
AOC3	-1.12827	0.011256	0.0707316	5.47089	6.59916	6.76209	4.54314	6.02443	7.02346	4.45175	5.34104	4.62977	7.04189	4.04067	4.85069	6.90547	7.25841	7.26745	5.12486	6.46139	6.01965	5.83474	7.192	7.25547	6.67217
AP1AR	-1.04059	0.00527091	0.042078	3.6507	4.69128	2.89957	4.4889	4.07107	2.91416	3.90636	3.62572	3.17149	3.4433	5.00666	2.97975	4.14627	5.66562	4.91274	2.73358	4.79008	4.92881	5.876	4.68546	4.6692	4.50506
AP2A1	-0.723099	0.0447457	0.180361	4.9601	5.6832	4.98831	4.99494	4.61313	4.89246	5.19072	4.961	4.64615	5.23075	5.0575	5.02608	6.22351	5.07472	5.16236	8.69944	5.32535	5.29645	5.1627	5.05296	5.61717	5.21737
APH1B	-0.76103	0.00382346	0.0332237	4.99466	5.7557	5.21793	3.9917	5.12671	4.89566	5.15097	5.55861	5.02877	5.12939	4.17342	5.67348	5.44396	5.51626	6.05986	6.80227	5.56929	6.45094	5.72417	5.78802	5.02841	5.17377
APOBEC3C	-0.798281	0.00255312	0.0250471	5.42846	6.22674	5.32596	5.04684	5.09059	5.38802	5.67939	4.83668	5.66128	6.05066	5.07879	6.12643	6.26446	5.70614	5.83916	7.65545	6.01714	5.82846	5.65015	5.92037	6.71439	6.67172
APOBEC3G	-0.774307	0.0130944	0.078395	5.35879	6.1331	5.33859	5.06422	5.06546	4.39551	6.35343	5.89188	5.90157	4.62945	5.28705	5.66072	6.4581	6.00195	6.07163	4.16205	6.5668	6.39376	6.53453	6.04923	6.42644	6.66647
APOBEC4	-1.55704	7.85321e-05	0.00207177	2.3687	3.92574	2.50848	3.01152	2.20376	2.18077	2.20029	2.49107	2.15561	2.21309	2.33606	2.38637	2.91405	4.75451	4.46113	4.67024	2.97371	5.37823	4.89083	3.73305	3.06662	2.41501
APOD	-1.64732	8.73599e-05	0.00224986	3.8027	5.45002	3.9246	4.40462	3.40322	4.98034	3.43614	3.76475	3.91614	3.71561	3.1804	3.30121	6.33343	4.2235	4.56112	5.13817	7.03316	6.0405	4.8273	5.5272	4.28889	6.52697
APOL1	-0.738671	0.00916388	0.0621196	5.32039	6.05907	4.81234	5.81852	5.16793	5.94827	6.18137	5.72608	5.74803	3.69375	5.35932	4.74833	6.02987	5.90445	6.47488	5.31527	6.01265	6.88192	5.98439	6.20891	5.8955	5.88283
APOL3	-0.621326	0.00749541	0.0536587	3.43281	4.05414	2.70369	3.9961	3.97736	3.77922	4.35923	2.65078	3.2603	2.95972	3.60647	3.03524	3.60903	3.8804	3.70199	3.85146	4.31502	4.57517	4.04444	4.056	4.57517	3.93267
AQP9	-1.19535	0.000776456	0.0108716	4.52664	5.72199	3.96915	3.81597	4.70269	4.15376	6.0939	4.79008	4.30492	4.66193	4.2353	4.5387	5.0106	5.84235	7.21606	6.6386	5.70443	5.52689	5.73305	4.33194	5.63641	5.57953
AR	-1.08847	0.000311246	0.00571614	3.80132	4.88979	4.00385	3.4495	4.41528	3.87151	3.46534	2.95345	3.06182	4.70724	3.1844	4.90082	5.02677	5.4127	4.91003	3.72152	4.8824	4.59562	5.05218	5.03315	5.16768	5.09582
AREG	-1.3576	0.000796258	0.0110965	2.67331	4.03091	2.93545	4.30199	2.5134	2.73958	2.1194	2.35032	2.10762	2.40816	2.77383	2.48338	5.22511	2.56091	4.15227	5.15161	3.08825	2.71262	4.80235	3.90165	4.03059	4.68373
ARFIP1	-0.627047	0.0406865	0.169212	5.39038	6.01743	4.95698	5.27006	4.11947	5.84155	5.94738	5.68812	5.13355	5.41951	5.90039	5.6268	5.8772	6.71509	6.72235	4.18486	6.24277	6.59468	5.6926	6.41998	5.44238	6.28236
ARHGAP10	-0.880715	0.000127203	0.00293987	5.27963	6.16035	5.56575	5.16741	4.94092	5.48348	5.20814	4.88076	5.47656	5.44396	5.336	5.29333	6.2285	5.93442	6.05231	7.48982	6.12198	5.34256	5.82503	5.90615	6.20498	6.49772
ARHGAP26	-0.637501	0.000883834	0.0119157	4.1685	4.806	4.10394	4.73848	4.38329	3.56575	4.16635	3.57363	4.24487	4.7687	3.94753	4.19241	5.07096	5.0254	4.52369	5.47284	4.84263	4.75672	4.61476	4.82389	4.48742	4.44168
ARHGAP32	-1.55528	1.12601e-06	9.49688e-05	5.31505	6.87033	5.35123	5.16906	4.67091	5.03315	6.23887	5.84096	4.90368	4.95094	5.65735	5.33439	6.81088	6.8134	6.60256	5.76768	7.57314	7.66665	6.81896	7.50827	6.71466	6.42711
ARHGAP44	-1.83206	3.01546e-06	0.000188955	4.55737	6.38943	4.89287	3.88167	4.85553	3.88604	4.502	4.33555	3.82829	5.30297	4.43904	5.64974	6.50853	5.55983	5.71641	8.13271	6.12093	6.24567	5.86685	6.44091	6.99201	6.31045
ARHGDIB	-0.78692	0.000901327	0.0120805	4.78879	5.57571	4.51562	4.56252	4.86474	4.95014	5.21525	4.74651	5.03315	4.50124	4.72434	4.7744	5.43875	4.79008	5.38541	6.9428	4.98593	5.79418	5.48752	5.28705	5.4455	6.19991
ARHGEF28	-0.594252	0.00158054	0.0179041	4.65593	5.25018	4.69636	4.13388	4.69088	4.2954	4.24197	4.91895	5.44027	4.54196	4.60711	4.99247	5.05296	4.82883	5.05015	5.0996	5.62333	5.67827	5.50221	5.56227	5.34104	4.76312
ARHGEF6	-1.40749	0.000377888	0.00659303	4.68617	6.09366	4.29133	4.76246	4.8411	5.07517	3.95641	5.02362	4.65011	5.0338	5.79759	3.43011	6.39202	6.27144	5.84096	4.17765	6.04164	6.50853	6.29261	5.97418	5.63287	7.80473
ARL4A	-0.791568	0.00201701	0.0212731	7.40238	8.19395	7.28824	7.05825	7.59401	7.47811	7.01854	7.03816	8.02769	8.19254	6.66104	7.66725	8.83767	7.61071	8.0678	7.01775	8.46554	8.32563	8.26373	8.88149	8.38048	8.08872
ARL6IP5	-1.14112	0.00622504	0.0470686	8.03073	9.17185	6.26625	7.80244	8.96377	8.14347	7.67165	8.53738	6.70918	8.13948	9.76736	8.30631	9.08504	9.78529	9.88228	7.24101	9.47098	9.48119	9.19713	9.05949	8.97012	9.54597
ARMC2	-2.7533	9.19992e-06	0.000432075	3.99587	6.74917	4.26692	4.7841	3.97225	3.95757	3.41141	3.93323	3.51705	4.63326	4.23395	3.24899	7.09839	6.88813	7.00324	4.31248	8.05481	8.16925	7.35602	8.33881	6.30047	3.97011
ARMC4	-1.4318	3.23992e-05	0.00108994	3.68141	5.11321	3.74068	4.30286	3.38981	3.2884	3.82481	3.5612	3.58496	4.05394	3.46511	3.60234	5.30434	5.86763	5.52966	3.67235	5.21566	5.6076	5.96624	5.66591	4.62188	3.68086
ARMCX1	-1.37042	0.000257669	0.00496802	7.35462	8.72503	7.51137	5.09547	8.0088	6.79499	8.57534	8.05249	6.80506	7.93904	6.99201	7.77157	8.39891	8.75363	8.12804	8.71925	9.0974	8.53233	8.9212	9.00255	9.14547	8.55157
ARSD	-0.85823	4.04558e-05	0.00128334	4.38141	5.23964	4.63244	3.61724	4.75734	4.4177	5.19248	4.67262	4.28121	4.06767	3.82481	4.35055	4.93358	4.98347	5.35932	5.17915	5.46502	5.46546	5.55601	4.9807	5.42832	5.04534
ARSJ	-0.628695	0.0269087	0.128108	3.51461	4.1433	3.39916	3.8448	4.69468	3.46084	3.15412	2.67682	4.45238	2.96321	2.70734	3.79272	3.80873	4.51326	5.14196	3.22512	3.70731	3.98097	4.34043	4.38632	3.83852	4.4904
ASPA	-1.19624	0.000813782	0.0112526	2.55408	3.75033	2.38987	2.18743	2.54684	3.55082	2.55294	2.51789	2.45218	2.62339	2.25472	2.46476	5.0444	3.78778	3.51592	2.43585	4.34716	3.91614	2.03557	3.86902	3.66349	4.8879
ATF3	-1.64795	0.000206122	0.00424554	5.37944	7.02739	7.98326	5.65112	5.48348	4.26934	4.26712	5.12579	5.07915	5.37744	4.74752	5.81017	7.81022	6.21038	7.1956	7.94582	6.15238	6.34509	6.86459	7.24398	7.40739	7.09839
ATF7IP2	-0.871767	0.00823198	0.0576077	6.06418	6.93595	4.99366	5.54944	7.19393	6.68639	5.96547	5.70614	6.03375	7.66012	4.78283	6.0701	6.79976	6.80029	7.27761	6.16339	7.2364	6.80943	6.65748	6.73774	7.54532	7.33208
ATP10B	-1.97374	0.00155539	0.0176642	4.537	6.51074	4.18112	5.15833	4.19626	3.72975	3.91022	6.26842	3.56244	3.75205	5.02677	5.58463	8.90032	3.93556	5.95952	6.86501	4.02592	7.60089	6.88999	5.99355	7.90103	7.03567
ATP10D	-1.85667	7.2406e-05	0.00194349	3.8116	5.66826	3.66027	4.28466	3.57593	4.37279	3.35799	3.61563	3.63841	3.71914	5.41687	2.47429	4.90315	6.39042	6.1869	3.12531	5.88391	6.00683	6.4258	5.47685	5.93442	6.34905
ATP2C2	-1.87261	9.39635e-08	1.88946e-05	4.91851	6.79112	4.4167	4.45444	4.99094	4.83586	5.29365	6.14312	5.03289	4.67489	4.38689	4.95573	6.47604	6.69279	6.70395	7.01707	6.98125	7.4963	7.38189	7.23785	6.33573	5.5883
ATP6V1E1	-0.598925	0.0385872	0.163811	7.66181	8.26073	6.27966	8.17988	7.49353	7.89333	7.68678	7.90317	7.84182	7.08156	8.9059	7.35242	8.29867	8.64785	8.93401	6.90663	8.02165	8.83767	8.30235	7.98326	8.21943	8.45578
ATP7A	-1.10035	0.00745696	0.0535097	4.99961	6.09997	3.7636	4.39277	4.11654	6.09352	5.78972	6.10131	4.95878	4.69848	5.76818	4.31325	6.34256	6.08673	6.35046	3.71652	6.0811	6.47004	5.82764	6.72938	6.69548	6.69975
ATP8B1	-1.02068	0.0140317	0.0823301	8.19617	9.21684	7.78484	7.17825	7.697	8.32947	8.42819	8.68385	7.97284	8.86666	8.2217	8.79886	10.1322	8.08343	8.16592	12.0179	9.33428	8.90032	8.70566	8.41884	9.13848	9.27142
ATXN10	-0.59467	0.0223291	0.113192	5.99093	6.5856	5.6132	6.52851	5.98995	5.67661	6.08628	5.89783	5.84096	5.58305	7.33753	5.35533	6.81176	7.36404	7.17977	5.51421	6.18584	6.86827	6.85409	6.39521	6.14179	6.54097
ATXN7	-0.720651	0.0445198	0.179629	6.55295	7.2736	6.71546	6.59431	6.90547	5.67554	6.52032	5.97212	5.93558	7.34827	6.70562	7.15677	9.24182	7.20962	6.37205	5.60366	7.53522	7.21641	6.58805	7.4623	7.38189	8.12495
AX747826	-0.817694	0.00520081	0.041748	3.91346	4.73116	4.42854	4.29257	4.36698	2.94632	3.7976	3.79374	4.0771	3.79625	4.01242	3.62311	6.28974	3.73686	4.32986	5.67827	4.06975	4.44804	4.55145	4.61313	4.84518	4.7493
AXDND1	-0.621126	7.04579e-05	0.00191689	2.16035	2.78147	2.24066	2.61985	2.19221	2.22962	1.99364	2.00317	1.9114	2.05777	2.01208	2.34307	2.72344	3.13074	2.78075	2.33315	3.08958	2.5305	2.61253	3.26838	2.86611	2.47955
AZI2	-1.24046	4.04635e-07	4.78228e-05	4.89457	6.13503	4.1364	5.0104	4.46276	4.59599	4.8064	5.38686	4.89796	5.11222	5.63829	4.89842	5.69298	6.41378	6.23596	6.15733	6.514	6.11633	6.55582	6.06344	6.03747	5.56314
B2M	-1.03288	0.0019086	0.0203789	9.5266	10.5595	9.97143	10.9257	9.46457	9.27948	9.92651	9.40873	9.69814	7.8466	9.56445	9.18043	10.421	10.5249	10.7133	9.38558	10.8782	11.2093	11.2093	10.3184	9.9098	11.025
B9D1	-0.695472	4.60505e-05	0.00141296	4.22953	4.925	4.51079	4.20215	3.95263	4.60602	4.28437	3.91438	4.0751	4.09762	4.31104	4.34121	4.63562	5.17347	5.12579	5.11291	4.87353	5.55778	4.95573	4.89024	4.5394	4.38554
B9D2	-0.889061	9.71209e-06	0.000444309	4.98768	5.87674	5.10338	4.95573	5.34069	4.72434	5.23707	4.76774	5.23236	5.10043	4.70447	4.71058	6.13823	5.65205	5.7954	6.24081	5.74778	6.36046	6.19902	5.98058	5.70212	4.95094
BAG3	-0.690483	0.0176925	0.0963158	6.57418	7.26466	6.18005	6.92331	7.40107	7.94679	7.46094	5.70404	5.51676	6.09834	6.7119	5.79856	7.0064	7.11655	7.35004	6.76685	7.15296	7.24838	7.57888	7.1834	7.49823	7.74488
BAIAP3	-1.21067	9.94431e-06	0.000450303	5.10496	6.31563	4.72027	5.59401	4.8281	5.0936	5.46078	5.37744	5.14788	4.76376	4.69493	5.36884	6.32401	5.61901	5.31151	6.86827	6.20131	6.75399	6.94116	7.04887	6.23596	5.85219
BAZ1A	-0.654122	0.00802676	0.0564602	6.63684	7.29096	6.29088	7.70555	7.19622	6.69279	7.1724	7.00092	6.33431	5.93727	5.98785	6.05021	7.07686	6.61768	7.05152	7.95635	7.47166	7.57559	6.80029	7.40826	7.57658	7.37484
BBIP1	-0.856236	0.00984963	0.0645613	4.85125	5.70749	4.63405	4.56838	4.68846	5.60579	4.49584	4.30337	4.5649	5.04684	5.68341	4.9215	5.71184	6.09942	6.00878	3.3766	6.35499	5.8294	6.56735	6.12986	5.47367	5.52297
BBOX1	-1.79597	0.00313289	0.0289926	4.08689	5.88286	2.97878	4.53385	3.2765	5.04534	6.49524	5.22825	2.82629	2.71986	4.69345	3.07132	4.69636	6.55454	6.37597	4.02455	5.96547	7.64177	6.78547	7.38662	5.07637	4.32146
BBS2	-0.819228	0.00368242	0.0323617	7.3662	8.18543	7.24039	8.14711	7.03881	6.0907	7.42061	8.28963	6.66446	7.89734	6.85221	8.02079	8.25211	8.23922	8.43068	7.28081	8.26876	8.04486	8.14347	8.69944	8.62325	7.87172
BBS4	-1.09745	0.000530019	0.00834552	6.21796	7.31541	5.41709	6.11585	6.31406	5.7641	6.72995	6.12198	6.18584	6.70643	5.73516	7.08914	7.3647	7.53427	7.19754	5.91779	7.85815	8.24994	7.48982	8.07536	7.10236	6.36416
BC039545	-0.94112	7.99852e-05	0.00210254	2.93546	3.87658	3.06216	3.03025	2.68599	3.0332	3.35001	2.86823	3.166	2.86031	2.47926	2.81922	4.06601	4.08672	3.56298	3.31141	4.57723	4.52702	3.25675	4.62734	3.20539	3.54499
BC042022	-0.668399	0.0176194	0.0961531	2.182	2.85039	2.34833	2.34486	2.01024	2.20125	2.10417	1.80104	1.49706	2.16194	3.45049	1.90057	3.14525	2.83846	2.92106	4.31248	2.29531	2.13987	2.08051	2.3153	3.32408	3.13162
BC042811	-0.642618	0.00181012	0.0196573	2.74256	3.38518	3.07132	2.44766	2.60706	2.60572	2.82581	2.82974	2.7001	3.13422	2.75152	2.45244	2.9474	3.29924	3.72914	4.56182	3.05031	3.6107	3.72609	3.04435	2.94461	2.93811
BC044614	-1.32551	0.0128924	0.077616	1.7619	3.08741	1.63013	1.51035	1.64848	1.76923	1.61914	2.27439	1.34926	1.76638	1.82345	2.22819	3.2566	1.74115	2.18656	7.01593	2.02641	2.78191	4.0073	1.98497	3.98739	1.88589
BC045791	-0.643613	0.044786	0.180401	2.45265	3.09626	2.21065	2.65217	2.9276	2.75477	2.25886	2.42156	2.15453	2.49739	2.42834	2.22059	2.45296	2.36099	2.65802	5.65751	3.16276	3.14083	2.91383	2.97244	3.3561	2.28717
BCAS3	-1.06382	0.00105152	0.0134528	5.16253	6.22635	5.2884	5.74082	3.97127	5.78234	5.33702	3.85799	5.81505	5.11463	5.48425	5.23356	6.70742	5.59783	6.32529	5.51049	6.10645	7.07973	6.85136	6.71717	6.02709	5.34069
BCHE	-1.75536	0.000185781	0.00391372	2.56817	4.32353	2.41026	1.98806	2.27321	4.28266	2.77669	2.71621	2.07028	2.23403	2.88333	2.04694	4.42854	5.23898	3.29948	4.31248	4.07169	2.35115	4.15914	5.50418	3.69699	6.17262
BCL10	-0.622656	0.000941107	0.0125226	5.11158	5.73423	5.0515	4.90082	5.29756	5.44061	5.00196	5.23499	4.75896	4.89455	5.56775	4.96704	5.74778	5.14119	5.66442	6.04393	5.38064	5.95152	6.59902	5.16448	5.83594	5.81339
BCL11B	-0.701905	0.0455775	0.182486	3.74738	4.44928	3.06554	3.02179	4.02752	2.92894	4.4963	3.27802	5.66342	4.40208	3.28621	3.30399	4.74675	4.00551	4.07677	3.97501	3.54973	4.54116	4.26122	4.56252	4.81012	5.96403
BCLAF1	-0.998436	3.59806e-06	0.000212024	7.36265	8.36109	6.97242	7.13236	6.95547	7.39006	7.81409	6.87981	7.82871	7.73699	7.70371	7.21288	8.80334	8.16925	8.21195	7.68678	8.73399	8.38641	8.23553	8.45928	8.26373	8.6606
BD495725	-1.27407	0.00276265	0.026587	5.59518	6.86925	5.48093	6.37403	5.87563	6.47213	6.98125	4.90173	5.22685	4.53687	5.41687	4.68546	8.86825	5.76818	7.33458	5.95603	6.39438	5.81916	7.18286	6.62942	7.57559	7.16403
BDH2	-1.08539	0.000471299	0.00768906	8.09007	9.17546	8.7501	8.41027	8.33116	7.64977	6.42461	7.96423	8.99143	8.10776	7.40146	8.86986	9.16176	8.45578	8.78976	9.14124	9.66033	9.29847	9.37822	8.98228	9.72683	9.1599
BEST4	-1.74774	0.00227189	0.0230768	5.14221	6.88995	7.11094	5.93343	4.01342	4.04231	8.06311	4.18034	4.3832	5.07096	4.4904	4.134	7.05335	6.68773	6.82951	7.76547	7.27499	8.37718	6.72068	7.2722	5.60265	5.31575
BICC1	-0.936286	0.00327569	0.0299252	3.01496	3.95125	2.94859	2.5598	2.92575	4.00681	2.43217	3.22804	2.66234	3.03661	3.65091	2.69857	3.76263	5.18993	4.42158	2.70723	3.6039	4.56664	4.68207	4.08433	3.6345	2.85965
BIK	-0.847333	0.00748523	0.0536395	7.18263	8.02996	7.39777	7.76071	7.42294	8.11117	7.16887	7.75101	7.53001	6.06268	5.80431	6.8168	8.6251	6.8693	8.57268	8.81204	7.98965	8.01846	7.93663	8.00359	7.33644	8.13572
BIRC3	-3.30238	7.07312e-06	0.000348679	3.79383	7.0962	2.23674	4.69233	5.07819	1.37776	3.36857	4.35195	2.95108	4.47149	4.68915	4.72099	8.70293	4.81328	7.2687	9.06562	6.07767	6.23799	7.5476	5.99644	6.52203	8.72977
BLNK	-1.18527	0.0155559	0.0882476	5.15573	6.341	4.32737	4.11428	4.92342	4.67615	6.98231	4.38166	4.4604	5.34601	5.84208	6.50362	6.25882	5.86627	6.6055	3.25459	7.03567	6.54889	6.93888	6.82803	7.0977	6.97562
BNC2	-1.33683	0.000127861	0.00295126	4.54238	5.87921	4.47491	3.57609	5.31046	5.25434	3.39801	4.01925	4.23145	6.45996	4.21193	4.48742	5.90445	6.20337	6.10366	5.87644	6.15993	5.67554	5.76898	6.05126	5.60818	5.44027
BNIP2	-0.79348	0.000154036	0.00341798	6.77865	7.57213	6.28293	6.51789	7.45927	7.39556	6.90239	6.42461	6.42931	6.61909	6.79844	6.95702	7.78387	7.3577	7.25841	6.82973	7.91933	7.54916	7.38662	7.73743	8.01521	7.88384
BRD1	-0.772759	7.8582e-05	0.00207177	6.54951	7.32227	5.97801	6.89191	6.94188	5.98142	6.06344	6.93451	6.65345	6.87716	6.92634	6.24697	7.23785	7.07346	7.0977	7.00941	7.57977	7.24282	7.76547	7.41512	7.54268	7.25841
BRE-AS1	-0.846236	0.0187282	0.100206	3.92544	4.77167	4.96769	3.69335	4.01342	4.41222	3.64378	3.2189	4.12485	3.85105	4.06576	3.26335	6.21455	3.9116	4.95511	6.17454	3.30941	3.89874	4.39658	5.52834	4.3719	4.95595
BTBD1	-1.2306	1.5446e-05	0.000633357	8.08616	9.31675	7.49113	8.18769	8.73768	8.36582	8.14602	8.83356	7.06395	7.75658	8.74718	7.53195	9.1083	9.60661	9.58482	9.6335	8.54846	9.58482	9.75414	9.26435	9.14855	8.93401
BTG1	-0.908907	0.000159741	0.00350892	5.83927	6.74817	5.35093	5.77172	6.14712	6.20956	5.85009	5.12042	6.07113	5.84492	6.29498	5.73178	6.39822	6.60125	6.54043	5.79584	6.73729	6.84551	7.2109	6.86723	6.69423	7.79084
BTG2	-1.67672	2.80117e-05	0.000977445	5.86616	7.54287	7.94178	5.08919	5.86254	5.32764	4.97291	5.24789	6.23684	6.07608	5.51977	6.38692	8.09978	6.37545	7.84417	7.52307	7.00877	7.12187	8.17648	7.4249	8.03406	7.82017
BTN2A2	-0.621293	6.05503e-05	0.00172181	4.10217	4.72346	4.06697	4.50873	4.38662	3.92757	3.84266	3.95957	4.17296	4.14255	4.05517	3.95893	5.13231	4.52876	4.57063	4.48552	4.63602	4.98945	5.19147	4.43283	4.37625	4.89141
C10orf107	-1.79996	0.000726919	0.0103656	2.53224	4.3322	2.23518	2.80578	2.78526	2.40222	2.67731	2.58321	2.43657	2.23876	2.59144	2.5667	2.68515	5.15336	5.08951	2.32007	4.28411	5.89229	7.01956	4.46828	3.74796	2.66175
C11orf16	-1.46015	1.61425e-05	0.00065537	4.83086	6.29101	4.32506	4.73563	4.74119	4.88675	5.28542	5.13355	4.93158	4.54222	4.58377	5.14341	5.88094	6.12589	6.32921	5.76361	6.69599	7.53091	7.33159	6.60974	5.91264	4.72956
C11orf63	-0.976698	6.1215e-05	0.00173468	2.84861	3.82531	2.30618	2.84237	2.72039	3.00992	2.59517	3.26556	2.68129	2.72707	3.47679	2.86136	3.70875	3.88775	4.12576	3.52708	3.61121	3.92672	4.99141	4.06231	3.46748	2.94461
C11orf65	-0.70045	0.00529836	0.0421433	2.06962	2.77007	2.15327	1.90381	1.62532	1.56364	2.46577	1.81813	1.91344	2.80948	2.70734	1.73601	3.17489	2.24533	3.03427	2.40222	3.10081	3.87379	2.85846	2.90824	2.21867	1.88402
C11orf88	-3.09112	4.98012e-07	5.39893e-05	2.76996	5.86109	2.48935	3.58803	2.64896	2.37216	2.96262	3.06101	2.69678	2.58619	2.8278	2.46674	5.72988	7.22902	6.57907	3.39385	6.44613	7.63852	6.3948	6.54133	4.83643	3.82185
C12orf55	-2.50559	4.27399e-05	0.00132972	2.48628	4.99187	2.71262	3.45304	2.78003	2.01531	1.80914	1.81703	2.30917	2.5758	2.5623	2.82835	5.55983	5.316	4.53802	2.81717	6.77988	6.54952	4.69731	7.1265	3.67816	2.85633
C14orf105	-2.28679	4.14072e-07	4.81622e-05	2.74672	5.03351	2.63704	2.75152	2.59978	2.45554	3.48128	2.84464	2.82098	2.41117	2.53033	2.93493	5.17509	4.61018	5.29645	3.45948	5.91264	6.6083	5.43286	5.84368	4.31696	3.67944
C14orf132	-2.13066	0.00118761	0.0146187	6.60689	8.73755	6.2127	5.27878	7.4563	6.34327	7.14197	6.20131	7.33753	6.01022	5.53346	8.55337	8.7455	9.45219	9.46102	4.79166	9.23605	10.3184	10.1436	9.62885	8.24058	7.3577
C14orf142	-1.24129	0.0380588	0.162304	3.61026	4.85155	3.26157	5.00284	2.9587	3.2757	3.4867	3.31892	3.55246	2.99277	5.20564	3.0473	3.92259	6.40699	6.29239	2.2632	4.08672	6.17682	7.46541	5.34356	3.35922	3.19857
C14orf64	-0.622679	0.0279145	0.13142	3.45956	4.08224	2.98383	3.28716	3.33272	3.37488	3.41535	3.52811	4.13003	3.57275	3.39506	3.57572	4.01392	3.98411	3.76523	6.36715	3.77963	3.75571	3.6077	4.01131	3.52471	4.01295
C15orf26	-1.58622	0.00014331	0.00322014	2.21573	3.80195	2.27228	2.62251	2.13613	2.1634	2.11965	2.19391	1.94425	2.16484	2.24066	2.29969	4.17043	5.00694	3.96146	1.79063	4.59624	4.27294	5.19589	3.88446	2.44271	2.69781
C16orf54	-1.55279	0.00130352	0.0156106	2.26648	3.81927	4.09676	1.94863	2.22588	2.29878	1.83632	1.9864	2.1623	2.01063	2.17687	1.9222	3.28302	4.22287	4.0771	1.77699	3.10025	4.44136	2.66527	3.35528	5.31303	5.95753
C16orf80	-0.975266	4.79796e-06	0.000265169	8.00344	8.97871	7.89975	8.91026	7.69832	8.08075	8.02672	8.44752	7.83769	7.697	7.57148	7.86496	8.89784	9.14124	8.97227	8.72977	8.52932	9.1764	9.22502	9.51676	8.63048	8.96799
C1GALT1	-1.01297	0.000149559	0.00333501	5.59935	6.61232	5.56691	5.41515	6.11106	5.98823	4.84804	5.52527	5.07266	5.3792	6.10804	5.97895	7.46943	7.175	6.35343	5.62215	6.29536	7.10452	6.9559	6.56043	6.06668	6.52032
C1orf204	-0.712055	0.00448394	0.0373578	3.74742	4.45947	4.60178	4.30443	3.62198	3.51592	3.47058	3.36279	3.42574	3.74098	3.6133	3.81664	4.41873	4.92881	4.68509	4.08625	4.98558	5.42015	3.65338	4.8156	4.02408	3.57703
C1R	-1.13386	0.0056668	0.0441148	7.19838	8.33224	7.83911	6.20183	6.97242	8.0665	6.89759	6.40338	7.74608	6.80355	7.11094	7.94235	8.93401	6.16306	7.75172	9.66932	7.65833	8.39364	7.80144	8.38404	9.38219	9.18462
C1RL	-0.993395	0.0232483	0.116284	4.69285	5.68625	5.31873	4.39739	5.36536	5.58602	3.52896	3.83289	3.7905	4.7271	4.80332	5.57823	6.69095	4.19546	5.609	3.53711	5.50436	5.69045	5.78007	5.89115	7.11094	6.85297
C20orf195	-0.615228	0.0486318	0.190829	4.73466	5.34989	5.3517	4.59532	5.12876	4.35467	3.60871	6.06558	5.34896	4.31164	3.99521	4.58601	5.10133	4.84655	5.84592	5.36295	5.00145	6.35437	6.29311	5.49844	4.54706	4.64766
C21orf2	-0.751126	0.00275813	0.0265748	5.34213	6.09326	5.79759	4.49494	4.73271	5.07819	5.26755	5.21848	5.73737	5.83916	5.31841	5.93689	6.17899	5.675	5.43875	7.37908	6.36665	5.77055	6.01063	6.16386	6.18137	5.76768
C21orf58	-0.884989	0.00115489	0.0143453	4.27636	5.16135	4.57549	4.56087	3.90421	4.06767	4.82443	4.33821	4.46988	3.97852	3.9584	4.08594	5.26634	4.61253	5.26214	4.38969	5.29925	5.97691	5.99984	6.04211	4.66425	4.10046
C21orf59	-1.06015	0.00202663	0.0213029	8.25213	9.31228	9.52786	9.41204	7.28373	6.99944	8.02165	8.26373	8.47208	8.03406	8.27867	8.22802	9.31262	9.44915	9.40873	8.6606	9.84429	9.93105	9.08032	10.2391	9.02219	8.17482
C22orf15	-0.923593	5.50009e-06	0.000287881	4.42081	5.3444	4.52589	4.42233	4.20809	4.73735	4.35827	4.45743	4.42202	4.27794	4.08537	4.71339	4.96563	4.85696	5.38873	5.58255	5.31464	5.91805	5.96292	5.61423	5.11104	4.72926
C22orf23	-1.9119	2.17757e-06	0.000151375	2.86648	4.77838	2.56809	3.33755	2.69811	3.11057	3.15387	2.42371	3.14395	2.49005	3.21325	2.5256	5.1882	4.7819	5.11703	4.50506	4.81972	6.35007	5.52899	4.83694	3.29387	3.36199
C2orf40	-1.58745	0.0258143	0.124596	4.80534	6.39278	5.28705	2.66424	3.70523	3.99074	2.34772	5.46843	5.65407	8.29096	5.75632	4.88859	4.99783	6.87981	7.85131	4.80605	6.49923	8.95812	7.51072	6.09441	4.65557	5.67481
C2orf50	-2.37462	9.86215e-06	0.000447721	3.97913	6.35375	3.5985	4.01849	4.26934	4.25714	2.85769	3.43306	4.57873	4.42825	4.40385	3.94624	6.06242	6.01343	6.09881	4.26641	7.65266	7.62202	7.20851	8.1099	5.70137	4.80198
C3	-1.28354	0.0273719	0.129619	10.2153	11.4989	7.47523	9.16176	11.1458	9.43172	8.03406	11.7125	11.9921	9.25677	11.6703	12.2733	11.6229	10.3412	11.5678	11.5163	11.0927	11.756	11.6041	11.1945	12.3458	11.9475
C3AR1	-1.0181	0.0102797	0.0663717	5.04693	6.06503	4.07944	4.44487	6.04599	5.0326	4.39767	5.34737	4.67746	5.10621	6.23981	5.09786	6.67217	5.63641	5.96659	4.08795	5.72862	5.97948	5.78082	6.2259	6.53234	8.03998
C4A	-1.63101	0.000627896	0.00935848	6.3744	8.00541	6.59008	5.08342	7.16465	5.69363	5.16391	6.12093	8.19031	5.48425	7.2109	7.04189	8.84729	5.99488	7.41011	9.07401	7.38391	8.25637	7.84997	8.44752	8.39111	8.39891
C4BPA	-2.09895	1.16126e-05	0.000509377	4.62025	6.7192	4.27488	4.11046	4.51287	4.72806	5.21921	5.42958	4.00883	4.4056	4.94121	4.57183	7.14268	4.67024	5.75294	7.16403	5.55695	8.01027	7.67797	8.17195	6.74714	6.29787
C4orf29	-0.760807	0.00625051	0.0472014	3.11074	3.87155	3.2082	3.29646	2.83956	3.27859	3.31399	2.98694	2.76599	2.71262	3.55082	3.15424	4.07245	3.56874	3.216	5.84409	3.75164	3.09928	3.71876	4.00091	4.116	3.32763
C5AR1	-1.57542	9.20187e-06	0.000432075	2.86626	4.44168	3.48786	2.95392	3.10586	2.99096	2.64384	3.14127	2.49542	2.37507	2.62654	2.8419	3.84867	3.73742	5.00784	3.13434	4.41432	5.79668	4.0995	5.58216	4.1851	4.61076
C6	-5.65572	2.04493e-13	1.21305e-09	3.35085	9.00656	3.51777	3.77103	3.15436	3.063	3.58682	3.42937	3.30228	3.24798	3.42461	3.01124	9.36227	8.50847	9.43475	7.58918	9.69326	10.4738	10.1481	9.46704	8.49399	6.89474
C6orf141	-0.72624	2.44288e-06	0.000165299	3.00265	3.72889	2.76656	3.31942	3.01461	3.0573	3.0698	3.42744	2.61759	2.82806	2.85095	3.07472	3.57114	3.76032	3.80497	3.8868	3.68373	3.82907	4.07281	3.50076	3.82737	3.35189
C7orf57	-3.66522	0.00010207	0.0025089	2.93713	6.60235	2.04359	5.53047	2.13688	3.4417	1.54308	3.85617	2.11287	1.98716	5.26755	1.45185	6.41998	7.60816	7.22447	1.94715	7.97514	7.94898	8.72252	7.89007	6.41805	3.86902
C7orf63	-1.64818	8.84194e-05	0.00226562	6.36179	8.00997	5.98289	6.43654	6.06268	5.55744	6.36715	7.07902	6.91286	5.93769	6.16052	7.12114	8.70981	8.00574	7.55321	5.76309	8.90032	8.8516	8.16815	9.12238	7.81252	7.21288
C8orf12	-1.72052	7.62209e-05	0.00202792	2.4569	4.17741	2.89101	2.55177	2.35712	2.29628	2.97428	2.63898	2.15687	2.11287	2.57841	2.01138	3.52453	3.11007	4.42873	4.2066	3.68751	6.03262	4.56182	6.04639	3.36386	2.81197
C8orf34	-1.0523	0.0014997	0.0172352	1.79357	2.84588	1.59212	2.26663	1.72203	1.69202	1.80721	2.00092	1.67637	1.78655	1.79599	1.5959	2.264	4.11748	3.29948	1.64569	2.17727	3.18294	4.4177	3.09744	2.41171	1.84505
C8orf44-SGK3	-0.71215	0.00850629	0.0589249	2.17949	2.89164	2.66758	2.49612	2.27581	2.61783	1.78721	1.90381	1.66957	1.96306	2.85697	1.55693	2.65709	3.80687	3.81928	1.82084	3.41922	2.69328	3.07121	2.78503	2.07115	2.77241
C9orf116	-1.34879	6.18357e-05	0.00174394	4.67404	6.02283	4.65242	5.54194	4.469	4.83423	4.86278	5.00638	5.12439	4.35972	4.19827	3.69127	5.14015	6.25207	6.34697	5.61423	6.12315	6.75177	7.37678	6.15915	5.20523	5.25877
C9orf117	-1.8073	1.88491e-07	2.867e-05	5.21451	7.02181	4.80088	5.32799	4.81093	5.03675	5.08317	5.90527	5.90615	5.14703	4.70556	5.42139	7.18079	6.32877	6.59008	6.84958	7.74488	7.53892	7.06517	7.98965	7.07902	5.8513
C9orf64	-0.710289	0.0205977	0.107149	10.281	10.9913	9.75414	9.29639	9.78529	10.3989	10.7225	10.6168	10.174	10.7879	10.0974	11.1767	11.496	10.2162	10.4421	12.8094	11.1945	10.9362	10.3268	10.6666	10.9468	10.8782
C9orf72	-1.66871	0.00137384	0.0162128	3.25357	4.92228	3.60148	4.07354	2.51945	3.64679	2.25953	4.83073	2.49457	2.84417	3.45343	2.81197	6.23931	5.84155	4.47928	2.11678	4.46146	5.00445	6.40513	4.52993	6.00516	4.13975
C9orf9	-1.22878	8.56338e-07	7.85536e-05	4.59784	5.82662	4.61947	5.00284	4.27351	4.62504	4.82276	3.89158	5.56453	3.9518	4.73907	4.48781	5.83683	5.69232	5.56177	6.06748	6.05861	5.83852	6.3948	5.69998	5.68565	5.43026
CA12	-0.903122	0.0127047	0.0769288	4.49794	5.40106	3.76032	3.94987	5.20404	4.71262	4.25793	3.91132	3.64399	6.36761	5.45134	3.72037	4.56148	6.27188	6.0473	4.50388	5.729	5.19414	5.65965	5.62333	5.70893	4.71103
CAB39	-0.957425	0.00381083	0.0331464	8.9442	9.90162	9.13848	8.6606	9.68652	9.12806	9.22195	9.22195	7.53427	8.33116	10.6473	7.87172	9.64341	10.5643	10.0974	9.55247	9.21783	10.1383	9.89769	10.2883	9.81265	9.80383
CACNA1D	-0.988108	0.000564321	0.00865001	4.17092	5.15903	4.24936	3.46891	4.41649	3.751	3.5105	5.35217	4.36322	4.62389	4.12367	3.85003	5.63395	4.42854	4.63525	4.35256	5.65251	5.58009	4.74247	5.85621	5.26634	5.44238
CADPS2	-1.60596	0.00337011	0.0305276	4.90344	6.50941	4.19929	4.47261	3.9116	7.60718	6.37657	4.31589	4.57304	4.81987	5.65321	3.10519	6.13202	7.41798	6.91776	4.11947	6.34099	6.32348	7.66725	6.3262	7.21003	6.6389
CALM1	-0.619234	0.00233442	0.0235774	7.3527	7.97193	7.2389	7.22239	7.10452	7.66277	7.40923	7.31584	7.09618	7.25841	8.0245	7.19425	7.71182	8.20514	8.15658	6.9957	8.19254	8.44928	8.49798	8.39011	7.64602	7.47416
CAPN2	-0.796331	0.000101386	0.00250592	7.63973	8.43606	7.18959	6.78493	7.79847	7.62312	8.01521	7.95998	7.89333	7.24101	7.76357	8.12804	8.42547	8.1316	8.37718	9.16913	8.63797	8.18638	8.1949	8.32082	8.42061	8.49651
CAPN3	-0.640323	0.0128679	0.0775212	5.45857	6.0989	6.05935	5.82846	5.74003	4.78171	6.13145	5.53987	5.07309	5.47016	4.53051	5.4311	6.34221	5.19302	5.66221	6.57577	7.07619	6.09008	5.37207	6.40394	6.14103	6.13244
CAPS2	-1.10042	0.000654948	0.00964856	1.91215	3.01257	1.96168	1.72406	1.80443	1.82068	2.10417	1.7987	2.1034	2.23843	1.70355	1.86237	3.28699	3.34588	2.23647	1.62656	3.69353	3.35775	4.02592	4.15465	2.55197	1.84599
CASC1	-1.59295	0.00783731	0.0554343	5.72444	7.3174	5.7108	6.3521	3.98646	6.83071	4.40108	5.43683	6.32195	6.76685	4.72844	6.70918	7.98234	7.87372	7.39107	3.84197	8.19924	8.55478	7.30332	9.06562	7.08377	5.87815
CASC2	-1.0149	1.59044e-05	0.000647675	2.72851	3.7434	2.47375	2.52979	2.63944	2.67039	2.56809	3.0048	2.65669	2.96752	2.94047	2.83413	3.35841	3.91829	3.96406	3.03576	4.02344	4.65587	4.11129	4.13248	3.18765	3.04678
CASP1	-0.976796	0.000452836	0.00752443	3.6545	4.6313	3.39235	4.1058	3.93924	3.35861	4.31481	3.72231	3.2112	2.82825	3.86578	3.80663	4.24659	4.56598	5.27592	3.21491	4.8949	4.5384	5.39335	4.36401	4.71229	5.1066
CASP4	-0.771896	1.10492e-05	0.000490351	5.08219	5.85408	4.558	5.40941	5.42926	5.10282	5.21349	4.91975	5.04174	4.89566	4.69233	5.55937	6.24648	5.64232	6.0645	5.97212	5.55817	5.73088	5.49051	6.01343	5.95986	5.86254
CASP6	-0.617207	0.0218884	0.111676	6.1958	6.81301	5.58173	6.70643	5.9385	6.32771	6.42766	6.68332	5.96869	6.38456	6.63809	5.30135	7.23706	6.84182	7.06879	5.07153	6.70691	7.27073	7.46144	7.01263	6.79643	6.66276
CASP9	-0.739329	0.000978995	0.012801	6.59344	7.33277	6.9428	6.27107	6.73852	5.59783	6.55631	6.66053	6.81577	7.03511	6.77358	6.54292	7.89545	6.62746	7.07346	7.63341	7.78281	7.01419	6.63059	7.48744	7.72366	7.45927
CAST	-1.07892	3.11954e-06	0.000192095	4.86557	5.94449	4.44209	5.46648	4.55238	4.96737	4.45148	4.94139	5.57399	4.35827	5.07153	4.83073	5.95152	5.86254	5.93201	5.2818	6.08953	6.24277	6.24923	6.38272	5.50401	5.94874
CAT	-0.663531	0.029461	0.13625	5.27664	5.94017	4.75933	4.77374	4.69636	4.45743	5.2686	5.28449	6.42766	6.23846	5.47195	5.38836	5.84281	5.60176	5.76138	4.54889	7.14197	6.52514	5.81538	6.37323	6.11221	5.67891
CBR4	-0.958788	0.00338488	0.0306396	6.07462	7.03341	6.7886	5.3517	5.65998	6.34395	6.59769	6.43177	6.22333	6.0826	5.30582	5.96072	7.58794	7.5039	7.27934	5.07715	7.76013	6.68741	7.37569	7.24282	7.54916	6.27054
CBX7	-1.54844	1.06448e-06	9.19586e-05	6.6546	8.20304	6.76209	6.63461	6.62334	6.40553	7.1258	6.64892	6.20288	6.2967	7.9292	5.9169	8.59998	7.4837	8.19141	7.65545	8.24994	8.58597	7.62202	8.64785	8.9435	8.05054
CCDC11	-3.12726	1.52275e-07	2.46353e-05	3.42554	6.5528	3.26053	4.4094	3.07308	2.94018	3.61695	3.65614	3.41651	3.77263	3.10519	3.0048	6.85976	7.16887	6.95322	4.96296	7.07284	7.8658	6.93646	8.07942	5.59137	4.03726
CCDC113	-2.93309	0.00287453	0.0272102	6.66937	9.60246	6.34395	9.08032	4.93757	7.0673	6.11948	7.19986	5.56868	6.83921	7.65161	5.88574	9.97962	11.1191	10.4913	2.35415	10.421	11.2458	11.0117	11.2746	9.89183	8.23553
CCDC125	-1.10224	0.0194344	0.102937	4.74472	5.84696	4.41051	3.74068	4.55067	4.46303	4.96563	4.71185	5.78838	3.86152	4.14317	6.81176	6.4132	5.7053	5.29119	3.21139	6.56495	6.76261	6.61287	7.05683	5.0921	5.75915
CCDC135	-1.05321	0.00345577	0.0311387	3.59001	4.64322	3.1669	4.38195	3.45463	3.80746	3.20763	4.31263	3.62944	3.36227	3.43167	3.14552	3.74522	4.82937	5.25564	3.28621	5.13107	5.9215	4.73294	5.99087	3.49412	4.04527
CCDC147	-3.30787	2.24744e-06	0.000155021	2.75729	6.06516	2.37953	2.78725	3.20117	2.09639	2.63244	3.2189	2.42747	2.95754	2.49542	3.37678	6.31299	6.61969	6.25207	2.30852	7.09839	7.41512	7.47811	7.63717	5.08919	4.44037
CCDC170	-1.55175	0.0011414	0.0142569	3.2538	4.80555	4.41222	3.16487	2.95366	3.21615	2.96262	2.67817	3.01767	3.86818	3.24172	3.02271	4.44804	5.791	4.39906	2.74158	4.33525	6.03688	6.76127	6.02405	4.07107	3.44726
CCDC176	-2.04444	0.000372635	0.00652056	5.93814	7.98258	5.31575	6.16874	5.61577	6.13098	4.69731	7.60089	6.38057	4.9998	7.23486	5.23669	7.43813	8.59029	8.34641	5.56418	8.68537	9.3301	9.26242	8.91916	7.76357	5.92615
CCDC181	-2.19926	1.36066e-05	0.000568412	3.53127	5.73053	4.90745	2.77944	3.88085	3.75423	2.43827	3.16892	4.00356	2.99844	3.29086	4.09064	5.83229	5.70404	5.74803	3.5985	6.60854	6.70319	6.23551	7.17455	5.31735	4.38329
CCDC19	-3.05992	2.50564e-06	0.000168903	5.21108	8.271	4.48613	7.75841	5.18033	5.12486	3.98411	6.15289	4.93088	4.14758	4.99058	5.355	8.35859	8.69944	8.28366	7.05499	8.81566	9.42538	8.61774	9.77516	8.06442	5.61492
CCDC33	-0.816841	3.9359e-06	0.000230406	3.96446	4.78131	3.92259	3.76898	3.82628	4.0652	3.90216	3.9665	4.21126	3.90595	3.81858	4.25714	4.45472	4.53597	4.69011	5.31909	5.06338	5.05812	4.72237	5.22432	4.27794	4.46702
CCDC60	-0.956513	0.00605326	0.0461542	4.17516	5.13167	3.88389	3.97202	4.20041	3.89903	3.97564	4.63008	4.44487	4.17174	4.11947	4.45444	4.94565	5.47593	5.43683	3.61219	5.45693	5.72031	6.95271	5.69716	4.19318	3.82584
CCDC65	-1.02993	0.000101662	0.0025064	2.40137	3.43129	2.36607	3.14249	2.31118	2.26973	2.25563	2.42297	2.42969	2.26646	2.28143	2.26801	3.43068	3.73978	3.48702	2.79416	3.56387	4.3107	3.77181	4.21726	2.60099	2.39666
CCDC69	-1.56605	6.6556e-06	0.000337445	2.5609	4.12695	3.05106	2.48371	2.49401	2.65401	2.24533	2.28906	2.66364	2.84346	2.68515	2.1995	4.20626	4.04215	3.99434	2.72411	3.83981	5.4688	5.22212	4.69155	3.69564	3.38472
CCDC81	-3.08988	3.50232e-09	1.78078e-06	3.42252	6.5124	3.24877	3.62547	4.26774	3.04435	3.40322	3.2189	3.46955	3.47628	3.57225	2.89871	6.28268	6.98996	6.32586	4.56893	7.40826	7.80473	7.031	7.10627	6.40338	5.20293
CCDC89	-1.03904	0.0153425	0.087455	2.22956	3.26861	2.34216	3.00869	2.27255	2.42317	1.84152	2.31984	1.94425	2.11265	1.88723	2.14358	2.50912	4.39428	3.73902	1.63088	3.12267	3.55036	5.56951	4.28177	1.80143	2.08702
CCDC91	-0.602694	0.00935383	0.0627444	3.97564	4.57834	3.82876	4.30994	4.16602	3.98003	2.9304	3.4589	3.63119	4.67639	4.85553	3.91929	4.87248	4.91934	4.88525	3.88523	3.99983	4.83352	4.69764	4.31743	4.57122	4.80145
CCL15	-1.60123	0.000672101	0.00979584	1.90933	3.51056	1.69976	1.88199	1.83392	1.79695	1.77553	2.5478	1.99456	1.56868	1.90262	2.0915	2.24426	2.60869	4.28824	2.95587	3.84766	5.43784	5.12223	4.64662	1.91379	2.04038
CCL2	-0.931498	0.00738296	0.0532363	2.85701	3.7885	2.88118	3.0751	2.95345	2.44969	2.74686	2.99304	3.04187	2.95944	2.8512	2.61822	5.75632	2.73691	3.74823	4.2175	2.89375	2.7035	4.37416	3.60858	2.92981	4.91628
CCL20	-1.67312	0.01138	0.0711152	5.18838	6.8615	3.69977	4.83892	7.79406	3.75296	5.88918	7.33812	4.32594	4.43241	5.28251	4.52993	6.57024	4.55447	7.62943	9.8798	6.71249	5.81852	7.12498	6.08953	6.01293	8.22265
CCL3	-2.03269	0.000287774	0.00539077	4.91745	6.95014	4.56931	5.266	4.578	4.48613	4.65727	4.68784	4.62903	7.5698	4.59709	4.134	7.90993	4.94375	5.68474	5.78007	6.87528	7.01347	8.23842	8.51643	8.18638	6.35292
CCL4	-1.80573	1.24816e-05	0.00053724	4.3528	6.15854	4.01887	4.25276	4.08368	3.99786	3.58186	4.32431	5.40621	5.33715	4.24065	4.28466	6.80227	4.92658	5.23214	7.17668	5.31706	6.2648	6.18938	5.72031	6.25659	7.69954
CCL5	-1.01981	0.000534675	0.00836122	4.19998	5.21979	4.2746	4.42362	4.40534	3.98529	4.60833	3.88859	4.92798	3.4913	3.36708	4.62771	5.48305	4.25534	4.85696	5.11507	4.39623	5.45831	6.04393	5.21048	5.06225	6.31628
CCNDBP1	-1.21827	0.00126135	0.0152151	5.05163	6.26991	5.06497	6.59849	5.38134	5.9169	4.75058	4.99521	4.58377	4.85696	5.21389	3.15424	5.89644	6.60469	6.99091	5.46472	6.20288	6.98511	7.17825	6.00195	5.78499	5.58915
CCNG1	-1.30621	0.000952047	0.0126061	7.66302	8.96923	6.14682	8.38159	8.54226	7.54532	7.47895	7.57148	7.7694	6.75037	8.4404	8.00359	9.02941	9.44082	9.86983	7.49151	8.0516	8.90185	9.83099	8.01156	9.33428	9.73039
CCNH	-1.17675	2.06241e-05	0.000775953	5.73129	6.90804	5.28082	5.69998	5.84839	6.5668	4.66579	5.3716	5.94154	5.2749	6.24794	6.41514	7.06879	7.02409	7.20225	6.18186	6.59431	6.76475	6.89412	6.91491	6.82546	7.60987
CCNI	-0.717591	0.0137624	0.0811463	8.15785	8.87544	7.19754	8.904	8.69228	8.21734	7.91654	7.7281	7.49779	8.64943	9.52786	7.24764	8.38048	9.28475	9.29639	8.1593	8.7501	9.07669	9.32179	8.64943	8.58597	9.24953
CCNL1	-0.899269	0.0216479	0.110734	7.20174	8.10101	9.75848	6.59186	7.38577	6.03215	6.80406	7.09356	6.71998	7.81022	7.31524	6.5061	7.94062	7.21444	7.76547	8.47327	8.10321	7.51376	8.52567	8.38048	9.45507	7.63813
CCP110	-1.34775	0.000120466	0.00283872	4.92445	6.2722	4.51627	4.80272	4.7527	4.8879	4.88525	5.02128	4.86807	4.95126	5.70245	4.85664	6.06711	6.47071	6.26842	4.78259	6.56173	7.24208	6.83921	7.62312	5.89229	4.97475
CCPG1	-0.705135	0.0149658	0.0861399	3.67971	4.38485	3.50698	4.36825	3.52733	3.93749	3.36684	3.3699	3.51115	3.26784	4.01676	3.9246	4.03572	4.9807	5.16082	2.78302	3.60988	5.2503	5.20436	4.398	3.99667	4.42903
CCR1	-0.635721	0.0069143	0.0506574	4.41841	5.05413	3.77466	4.4261	4.58868	4.88601	5.00482	4.13582	4.00147	4.53447	4.96477	3.86733	5.46588	4.84869	4.53967	5.11326	5.41665	4.93124	4.90574	4.07474	5.33216	5.91332
CCR5	-0.641244	0.0139507	0.0819633	6.42411	7.06535	5.12042	5.92595	6.9519	6.16808	6.1848	7.70951	6.79449	6.33509	6.43801	6.61287	7.43888	7.01593	6.59393	7.95258	6.84243	6.7422	7.18682	6.84738	6.97708	7.05631
CD14	-1.35699	0.00866406	0.0596924	5.21668	6.57366	3.2765	4.74615	7.131	5.46938	4.26992	4.072	5.24038	6.32195	6.62034	5.01914	7.20902	5.27592	6.91659	4.59757	6.87202	6.76209	6.13823	6.43135	7.92396	7.60987
CD2	-1.08996	0.00700392	0.0511479	3.2819	4.37186	3.04952	3.89557	4.15764	2.64267	2.72707	2.63846	4.2468	2.96486	3.05055	3.44581	4.38969	4.65872	3.99687	1.69764	4.44588	5.03604	5.14788	4.20913	4.52073	5.61601
CD38	-0.825427	0.00400038	0.0343511	4.40241	5.22783	5.1319	4.47686	4.61413	3.78014	5.25298	3.94542	4.48042	3.89759	4.17058	4.27403	5.52639	4.58482	4.79263	6.28647	5.88726	5.04741	6.06668	5.16543	4.46188	4.45937
CD3D	-0.698638	0.00171597	0.0189321	4.00302	4.70166	3.96041	4.02535	3.8654	3.86559	3.83205	3.88886	4.95698	3.66279	3.73084	4.24197	4.22751	4.22751	4.25714	5.70229	4.39343	5.01746	4.74881	4.67262	4.44418	5.32566
CD44	-0.93234	0.000961261	0.0126747	4.08834	5.02068	3.61695	4.20996	4.07633	3.81377	5.34215	3.88296	3.60844	3.29695	3.67973	5.35613	5.28581	5.34383	5.25363	4.53768	4.74037	5.34033	4.9366	4.64693	4.61253	5.50907
CD48	-0.725803	0.00288948	0.0272961	4.14252	4.86833	3.69977	3.94729	4.05908	3.80248	4.16372	4.52549	4.55128	4.31629	4.13606	4.22376	4.16694	4.4604	4.61747	5.59861	4.43009	4.77241	5.1343	4.27662	5.00638	6.22005
CD53	-0.698217	0.0368819	0.158999	5.46833	6.16655	5.11861	5.19795	6.061	5.10043	5.21628	5.16906	5.49691	5.23181	6.62746	5.46383	6.08395	5.80306	6.12315	7.02697	5.75423	5.88504	5.53786	5.22243	5.81411	8.41473
CD59	-1.00096	0.00918837	0.0621971	6.92969	7.93065	7.04788	6.98554	6.38092	6.23887	6.71778	7.82324	7.20493	6.40936	7.72632	6.76209	7.81116	8.10776	8.43848	5.57655	8.21734	9.15784	9.04438	8.34641	7.26745	7.33914
CD69	-3.7807	4.49967e-10	4.00381e-07	3.4353	7.216	3.25995	3.98411	2.89733	2.35937	3.82829	2.55343	3.19642	4.24552	4.72027	3.3083	7.7817	6.99152	7.17825	5.64142	6.55983	6.90135	7.53892	6.76385	7.87498	8.92821
CD74	-1.45923	1.19181e-07	2.05917e-05	5.17647	6.6357	4.82937	5.20153	5.70343	4.70447	4.77338	4.40321	5.67018	5.27931	5.26546	5.93442	6.70868	5.97461	6.52676	6.45191	6.71778	7.16532	6.5417	6.64352	7.08838	6.53835
CD83	-2.54292	5.15076e-06	0.000276093	6.57565	9.11858	7.1834	5.95913	7.82324	6.04009	6.15389	6.47247	6.04393	7.68347	6.87861	5.5183	9.29847	7.97985	10.2808	10.8395	7.23418	7.70371	8.81204	9.99938	9.46102	9.5768
CD8A	-0.828921	0.00561782	0.0437859	3.3754	4.20432	3.42771	3.23562	3.84085	3.31942	3.02352	3.43691	4.51316	2.73064	2.64674	3.57937	3.42841	4.51595	4.32217	3.11038	3.32097	4.64766	5.39752	4.45317	4.38082	4.46611
CD97	-1.61991	9.25914e-06	0.000433005	6.10564	7.72555	5.95696	7.56105	5.90855	5.81451	5.32954	6.2775	6.95222	5.41576	5.57858	6.26175	7.21223	7.26946	7.7885	8.62705	7.05926	8.11547	8.59029	7.79084	6.9195	7.88294
CD99	-0.612513	0.0162264	0.0908635	6.12367	6.73619	6.38391	4.90115	6.0552	6.72375	6.51833	7.37282	5.31575	5.93201	6.19144	5.84235	6.70255	7.05753	7.08914	6.39376	6.30839	7.01775	6.77689	7.10888	6.46188	6.44509
CDC14A	-0.964752	0.000228826	0.00458579	3.2659	4.23065	2.96181	3.0286	3.56995	3.4916	2.94461	3.17989	3.7779	4.03132	3.02969	2.6436	4.49232	4.20245	3.93579	3.13254	4.87021	4.62188	4.36178	4.99848	3.82093	3.87012
CDC40	-0.740883	0.00248512	0.0247034	5.16731	5.90819	4.43315	5.15592	6.00294	4.82245	5.17484	4.64893	5.42666	5.09582	5.91185	5.00056	5.76166	6.093	6.16987	4.62903	6.42542	5.95913	6.22104	6.07215	5.94544	5.80519
CDH12	-1.37779	0.048907	0.191244	3.58709	4.96489	6.50327	2.43548	1.76145	3.62145	3.70539	2.45997	3.03456	3.26385	6.8028	2.28273	3.52364	7.03816	6.42499	2.38995	6.17303	5.09994	5.659	4.59532	4.23112	4.51369
CDKN1A	-2.74426	1.97822e-08	6.06973e-06	6.03679	8.78105	7.37239	7.36042	5.49493	6.94546	5.19971	5.08342	6.02294	5.02362	5.80373	6.06129	8.37594	8.33755	9.04674	9.73958	8.11234	9.17186	8.49469	9.05399	8.29741	9.18043
CDO1	-1.1744	0.027265	0.129179	2.89048	4.06488	3.94894	2.01304	2.03586	2.72487	2.27387	1.84025	2.73511	2.23829	6.96699	2.12755	3.10164	3.11681	4.17904	3.79784	4.11428	4.17489	4.42721	5.15295	4.25557	4.32853
CDS1	-1.13624	4.7381e-05	0.00144878	4.41048	5.54671	4.14151	5.18597	4.47014	4.06914	3.74009	4.53597	4.65156	4.69233	4.53645	4.0816	5.9164	5.74003	5.58575	4.05683	5.79856	6.02532	6.02566	5.72305	5.59073	5.00482
CEBPD	-1.54511	7.77603e-05	0.00205926	5.65384	7.19896	7.08325	5.8072	5.44636	5.75154	5.31232	5.19705	5.73268	4.61563	5.60417	5.98823	7.73516	5.65015	7.21164	8.12252	6.62402	6.74012	7.40591	6.46636	7.60089	8.43278
CECR1	-1.80863	4.90261e-06	0.000267628	7.33059	9.13922	6.73349	6.12315	7.91842	7.34916	7.52307	7.32864	8.1526	7.04588	6.4639	8.66759	9.17829	9.30668	9.1599	7.93022	9.04438	9.46704	9.77516	9.86227	9.36956	8.29867
CEL	-0.944372	0.0375419	0.161026	5.38738	6.33175	6.34817	5.88504	4.28437	6.04354	5.84235	5.40369	5.84537	5.92951	3.69861	4.59312	4.99366	7.05254	6.74519	6.11503	6.81088	6.13244	6.46889	8.72798	5.25342	5.01746
CELF2	-1.31741	1.9313e-05	0.000741648	4.09567	5.41308	3.93988	3.67628	5.35093	3.77484	2.99724	3.86763	4.94206	3.61695	4.60881	4.1821	5.33715	5.88918	5.43751	4.67435	5.40068	5.24704	5.3996	5.09438	5.83508	5.81586
CEP162	-0.873525	0.000488044	0.00788928	4.92811	5.80163	5.11138	4.55323	5.40852	4.49807	4.3301	4.30772	6.04485	5.05399	4.49494	5.47826	5.44238	5.5883	5.67348	5.50907	5.91138	6.17682	6.15829	6.41564	5.8493	5.29166
CEP83	-1.23712	0.0100889	0.0655742	6.09192	7.32904	5.50041	6.19254	6.78929	6.33034	4.51595	6.75925	6.13098	6.73349	6.28091	5.68605	7.58545	7.8404	7.62558	4.33924	8.25862	8.20348	7.7536	8.52417	7.41324	5.74661
CES1	-1.6231	0.000235118	0.00466462	3.49472	5.11783	4.27429	3.64146	3.10586	4.05942	3.19158	2.99385	3.8954	3.67304	3.32388	2.78847	6.03059	4.17015	5.37744	4.48847	5.45751	5.21981	7.48207	5.17415	4.39187	3.3862
CES2	-0.78408	0.000496519	0.00793182	5.55912	6.34321	5.35991	6.33716	5.66896	5.1911	5.44313	5.13293	5.64467	5.31949	4.90203	6.59186	6.44768	6.21587	6.06608	5.98483	6.31582	6.9123	6.00346	6.68583	6.539	6.26117
CETN2	-1.85528	4.54426e-05	0.00139671	8.39908	10.2544	7.54162	10.1545	8.16716	8.47905	7.53427	9.56911	8.11547	7.21877	8.87968	8.33116	10.2232	10.6473	10.5546	9.35336	10.2683	11.3932	10.8508	10.9129	9.35967	8.98043
CFC1	-0.720178	8.15966e-05	0.00213543	3.11068	3.83086	2.95446	2.85868	3.27749	2.92688	3.45133	3.68688	2.858	3.11238	2.76261	3.2181	4.00705	3.93267	3.74212	3.34973	4.38051	4.38113	3.59316	3.73187	3.49539	3.69496
CFD	-0.980816	0.000494004	0.00791837	4.57796	5.55877	4.66068	5.83852	4.70592	5.03197	3.77608	4.42438	4.58335	4.34921	4.58094	3.82851	4.87783	5.03809	5.57655	6.57084	5.26409	5.91459	5.48798	6.14552	5.27543	5.43683
CFI	-2.4081	8.68678e-10	6.44125e-07	6.11127	8.51937	5.77307	6.33509	5.88391	5.84096	5.6537	6.13326	6.43291	6.29498	6.66938	6.09539	9.41887	7.64263	8.56442	7.32223	8.22915	8.70981	8.32082	9.02312	9.35609	8.60651
CFTR	-0.72417	0.000724499	0.0103477	2.92424	3.64841	2.67263	2.96089	2.69198	2.36527	2.70525	3.70278	3.25146	2.58321	2.65217	3.65671	3.73107	3.66582	3.8357	2.76438	3.53863	3.93236	3.90465	3.4539	4.03995	3.61758
CH25H	-1.53187	0.00026401	0.00507379	3.14263	4.6745	3.78514	2.84573	2.80506	3.46817	2.36928	3.20293	2.81173	3.26492	3.21957	3.65374	5.53558	3.54268	3.13583	6.06201	4.34836	3.53355	4.78141	4.2954	5.29562	6.21455
CHD1	-1.04907	0.00443097	0.0370031	6.79346	7.84253	6.06313	6.49923	6.1958	7.21514	6.32348	6.87139	8.16309	6.55099	5.81179	8.24058	9.04106	7.18549	7.45268	7.49711	7.69164	7.53692	7.30516	7.69832	7.78085	9.23605
CHDC2	-0.957248	5.0201e-05	0.00151019	3.6867	4.64395	3.39319	3.78496	3.36098	3.2967	3.91073	3.68612	3.35952	4.08859	3.66634	4.31985	4.66081	5.22318	3.87101	4.37823	4.9408	5.04253	4.48149	5.32353	4.56893	3.94894
CHGB	-2.23455	0.00413616	0.0352527	4.23395	6.4685	3.46748	3.3233	3.72757	2.72432	3.82464	3.46309	7.5476	4.74752	4.81802	4.69593	8.01739	6.03747	4.22414	5.70229	7.81559	4.89955	4.26482	8.59029	5.43534	9.69814
CHIC2	-0.621938	0.0317313	0.143053	3.71205	4.33398	4.34585	5.33177	3.56522	2.91784	3.03495	4.1058	3.23452	3.52497	4.40385	2.6557	4.6692	4.42014	4.73221	3.72202	4.26774	4.63343	4.65391	4.06049	4.20156	3.97914
CHKB	-0.923814	0.00454311	0.03778	6.93597	7.85978	5.57744	6.44953	6.84627	6.69126	7.15392	6.39106	8.53013	6.44122	7.17825	8.10061	7.99214	7.43722	7.51738	8.41473	8.02721	8.05768	6.93568	8.21617	8.05901	7.94062
CHN2	-0.668548	0.00402065	0.034466	3.47079	4.13934	3.41947	3.17325	3.34469	3.6824	3.22623	3.09744	3.74325	3.78801	4.09091	3.14223	4.16097	5.04942	4.40462	2.91784	4.01059	4.2245	4.80528	4.15657	3.82954	3.83403
CHORDC1	-0.722886	0.0213811	0.109907	8.07252	8.79541	8.01027	8.19254	9.57339	7.82124	7.54677	8.2878	6.87861	8.96799	7.92582	7.52078	8.78151	9.19713	8.93216	7.61582	8.88342	8.76752	8.97227	9.3501	9.52392	7.93022
CHPT1	-1.41913	0.000880435	0.0118948	4.2409	5.66003	3.77384	4.43461	3.94753	4.99686	4.34427	4.38771	3.38391	4.26398	5.44061	3.43571	5.16512	5.18309	5.34502	8.16716	6.20571	4.7971	6.37942	4.8894	4.76544	5.70287
CHRDL1	-1.108	0.00499595	0.0407087	4.07931	5.18731	3.05606	3.85617	5.58344	3.46084	3.2728	3.614	3.40149	5.69363	4.56214	4.29257	6.05487	3.77362	5.35093	5.55211	4.81972	5.04253	5.49164	6.2474	4.88125	4.65907
CHST6	-1.48811	0.000703251	0.0101173	3.83671	5.32482	2.98661	5.65407	2.93271	4.31248	3.96696	3.35169	3.40101	3.04567	5.57858	3.13738	4.51595	5.39197	5.11979	5.27006	5.45182	6.62444	5.95801	5.93921	4.43858	4.5384
CHST9	-1.74974	0.00726101	0.0525934	3.23921	4.98895	3.25585	2.89871	2.45912	3.04435	6.26446	2.44363	2.14321	3.12331	4.04368	2.71574	4.89796	4.42264	5.38375	3.01767	6.3225	6.49092	7.64729	5.51676	3.30443	2.88558
CIB1	-1.27046	0.000125402	0.00291338	6.47263	7.7431	7.30516	6.93536	6.53453	6.61728	6.94766	7.11777	5.53598	5.90924	5.54944	6.27391	7.65161	7.84294	7.96217	6.42885	7.9326	8.82416	8.02999	8.06311	7.55321	7.14232
CIDEB	-0.644998	0.00301725	0.0282011	4.03486	4.67986	4.32122	3.73084	4.27173	4.03249	3.96431	3.55677	4.34527	3.79569	4.19626	4.134	4.23642	4.09749	5.20362	3.83044	4.961	5.3465	5.41824	4.87586	4.52525	4.30376
CIRBP	-1.53419	7.39349e-07	6.96162e-05	9.21857	10.7528	8.78151	8.01521	8.89488	9.23403	9.74726	8.88342	8.95984	9.80865	9.36956	10.4913	10.7528	10.7747	10.6666	10.3628	10.9576	10.9468	10.3861	10.9257	11.025	10.7295
CITED1	-0.968483	0.0100459	0.0654236	3.99513	4.96362	3.71619	3.85407	3.9177	3.70216	3.73762	4.06601	4.39991	4.1585	4.12516	4.27403	5.70086	4.11628	4.6509	4.13267	3.95209	6.87202	3.8546	5.12825	4.50853	6.71998
CLCN3	-0.992359	0.00960861	0.0637327	5.35234	6.3447	5.1475	4.6153	5.40621	4.97103	5.42336	6.18137	5.26679	5.39264	5.98526	5.13397	6.01395	7.37678	6.88813	3.51133	6.42248	6.76958	7.04935	6.76082	6.37263	6.28199
CLDN1	-1.71531	0.000491621	0.00790513	5.72607	7.44137	5.01551	5.25504	7.41648	6.09591	6.15117	5.77766	4.48713	5.12223	6.0562	5.88333	8.60651	5.70287	7.30703	7.87898	6.97165	6.44808	6.77304	6.69928	9.00826	9.01803
CLDN10	-1.15304	0.0210946	0.109001	4.74816	5.9012	3.78605	5.64935	4.65156	6.19662	3.95041	6.53945	3.28716	3.82217	5.77483	3.82404	5.24826	6.45044	6.65293	7.76357	4.7159	6.43976	6.54693	5.19072	5.39422	4.60926
CLDN2	-0.631857	0.0228357	0.114993	3.48778	4.11964	3.33889	3.53984	3.614	3.47041	3.14639	3.44092	3.84974	3.46042	3.78605	3.23118	3.48317	3.52733	4.18112	4.64615	3.46222	3.59756	4.99999	4.03059	5.8586	3.40969
CLEC10A	-0.712684	0.00273498	0.0263947	3.23884	3.95152	3.28378	2.8459	3.40485	2.81069	3.3794	3.02125	3.53211	3.44668	3.15377	3.50998	4.2471	3.15857	3.84799	4.71737	3.85054	3.68086	2.90944	4.06673	4.0652	4.97145
CLEC2B	-0.679559	0.0180612	0.0977251	3.92111	4.60067	3.90373	3.71454	3.87298	5.02909	3.36364	3.59378	3.48412	3.82851	5.0391	3.38163	4.10046	4.56062	4.7415	3.32689	4.23473	4.75707	4.90082	4.5509	5.48842	5.34529
CLGN	-2.01904	0.0477758	0.188435	5.34144	7.36048	3.66405	7.65336	6.2309	7.41099	2.0746	6.80506	4.55968	3.05746	8.77534	3.18294	7.41512	8.91397	8.48673	1.87663	7.85049	9.28475	9.41887	8.20445	6.93888	5.21491
CLU	-1.00194	0.00125098	0.0151342	7.34591	8.34784	6.43352	7.45084	7.7973	5.72305	6.8635	7.50284	8.48396	7.43439	7.48598	8.28366	8.04659	8.22265	8.22491	8.41723	8.66608	8.40301	8.23303	7.78085	8.98465	8.49944
CLUAP1	-0.746579	0.000747243	0.0106129	4.90825	5.65483	4.5881	5.29603	5.09627	4.59165	4.86384	4.82183	4.86474	5.04779	5.06009	4.85214	5.42015	6.10997	5.8097	4.76544	5.67827	6.09591	5.9347	6.3799	5.70571	4.64855
CMAHP	-0.610301	0.00883942	0.0606657	2.6815	3.2918	2.65669	2.33296	2.5333	2.76903	3.36335	2.75116	2.77437	2.05498	2.95476	2.62443	3.08039	3.01152	3.33118	2.22628	4.53329	3.57542	3.43068	3.62119	3.19134	2.91674
CMTM6	-0.966177	7.62349e-05	0.00202792	7.07863	8.04481	6.77358	6.67217	6.41943	6.68583	7.19986	7.5512	6.34952	7.49711	7.76892	7.86869	7.70239	8.26709	8.12252	7.51137	8.00359	7.93363	8.04248	8.06907	8.53013	8.2658
CNDP2	-0.712975	0.000696694	0.0100392	7.3033	8.01627	6.29988	6.54631	7.55321	7.75471	7.75231	7.17977	7.2157	7.49868	7.40826	7.82415	8.1513	7.91216	7.83769	8.63219	8.09223	7.99214	7.99714	7.90429	7.94785	7.69573
CNGA1	-1.51846	1.80712e-05	0.000712819	3.38479	4.90325	3.06875	4.16716	2.82825	2.93242	3.29131	4.43559	3.32713	2.8788	3.15377	3.76475	4.19657	5.71971	4.81987	4.48781	4.33578	6.24447	5.29365	4.57939	4.01866	5.33662
CNN1	-0.711862	0.023466	0.117139	4.09095	4.80282	4.86514	3.87969	3.53355	4.51287	3.94923	4.7029	4.63709	3.42524	2.96891	4.43493	5.2567	5.09036	5.05711	3.08158	5.24704	4.57414	4.19808	4.69764	5.17302	5.65251
CNTNAP3	-1.71941	0.000504642	0.00804052	2.92174	4.64115	3.32713	2.17954	4.80169	2.32271	2.29689	3.92546	2.18241	3.09053	2.59389	2.49716	4.333	5.77856	4.724	2.39022	4.05517	4.44251	5.39103	4.09878	6.45069	4.74752
COG7	-1.02148	0.000518973	0.00822408	5.4132	6.43468	5.40484	6.10901	4.79294	5.29301	5.67463	5.0916	5.06009	5.7641	5.5389	5.40289	6.04211	5.90385	6.08054	8.33755	6.59263	6.47706	6.42291	6.54133	5.73076	6.2181
COL21A1	-5.14945	1.05585e-08	3.91456e-06	3.53645	8.6859	3.5479	3.44414	4.50909	4.25905	3.20317	3.56094	2.84262	2.94537	3.91073	3.14146	7.45983	8.68707	8.59623	5.43237	10.5249	10.297	9.68272	10.1436	10.05	5.98526
COLQ	-0.833058	0.00521907	0.0418372	4.37513	5.20818	5.00694	4.18337	4.7731	4.31136	3.93924	3.18331	4.46021	4.71654	3.36014	5.81705	5.5898	5.38775	4.81432	4.86031	5.61468	5.40432	4.96593	5.90796	4.83731	4.69945
CORO2B	-1.97936	2.91444e-06	0.000184575	4.13044	6.1098	3.44213	3.54764	4.41051	4.11129	3.72395	3.44726	5.15017	4.48713	4.09064	4.89368	5.36731	5.7226	5.81155	4.68463	7.24398	6.77963	6.72068	7.26577	5.68383	5.818
COX7A1	-0.730632	0.00323369	0.0297092	4.05494	4.78557	3.95641	3.90146	3.70773	5.57655	4.24065	3.89934	4.27294	3.60903	3.78496	3.60029	4.27173	4.89842	5.02998	5.61636	4.56511	5.04253	4.39658	4.85417	4.26585	4.91495
CPEB1	-1.21117	9.15727e-07	8.31443e-05	3.02052	4.23169	3.40859	2.55631	3.02071	2.70326	2.68643	3.25127	3.00614	3.10928	3.13206	3.33118	3.88085	4.20594	4.1128	3.74846	4.28779	5.47718	4.1435	4.33496	4.29169	3.83373
CREBL2	-1.22296	0.000201637	0.00416763	5.26587	6.48883	4.74083	5.30253	5.42555	5.22765	5.09009	4.42792	4.88444	5.99644	6.6446	4.91863	6.11585	7.04719	7.07213	5.01914	6.23038	6.74833	7.19023	6.42711	6.55517	6.48277
CRELD2	-1.13112	2.0298e-05	0.00076693	8.03798	9.1691	8.04799	8.5981	8.20946	8.38355	7.41424	7.83911	8.49651	7.24148	8.26876	7.88062	9.27645	10.5096	9.1083	8.90032	8.79308	9.02941	8.96377	9.29065	8.84157	8.97786
[truncated: 1,119 more rows]
