# Supplementary material for: The Expression and Role Analysis of Methylation-Regulated Differentially Expressed Gene UBE2C in Pan-Cancer, Especially for HGSOC
Source: Cancers (Basel). 2022 Jun 25;14(13):3121. doi: 10.3390/cancers14133121 (PMC9264902; doi:10.3390/cancers14133121)
Supplement: Supplementary file 1 [file cancers-14-03121-s001.zip › Table S3. The DEGs in the GSE18520 dataset.xlsx]

## Sheet: up_HGSOC_vs_normal
#log2FC >= 0.585 #p-value cut-off <= 0.05 #q-value cut-off <= 1.00 #Condition pair: up_HGSOC_vs_normal
Group.1	log2FC	p_value	q_value	HGSOC	normal	GSM461348	GSM461349	GSM461350	GSM461351	GSM461352	GSM461353	GSM461354	GSM461355	GSM461356	GSM461357	GSM461358	GSM461359	GSM461360	GSM461361	GSM461362	GSM461363	GSM461364	GSM461365	GSM461366	GSM461367	GSM461368	GSM461369	GSM461370	GSM461371	GSM461372	GSM461373	GSM461374	GSM461375	GSM461376	GSM461377	GSM461378	GSM461379	GSM461380	GSM461381	GSM461382	GSM461383	GSM461384	GSM461385	GSM461386	GSM461387	GSM461388	GSM461389	GSM461390	GSM461391
AAR2	0.894482	0.00428473	0.0123985	10.7265	9.83202	10.4334	10.9419	11.2618	9.87498	10.8169	11.089	9.98779	11.0299	11.3081	9.62636	11.1456	10.7844	11.1377	10.4734	10.9215	10.7198	11.4046	11.0154	10.62	11.2165	11.3755	11.0071	11.3337	11.4361	11.1511	10.4993	10.7865	10.4899	9.05981	11.1018	11.1968	9.55814	11.5483	11.5962	11.5885	11.9871	11.4533	11.4989	11.9247	11.8929	11.8963	11.4819	9.63527	10.8276
AATK	0.905067	0.0102827	0.0256359	10.2516	9.3465	9.33827	10.5267	10.7383	8.8495	10.5349	10.7373	10.2386	10.1836	10.6327	9.11509	10.6907	10.5349	10.8873	10.7149	10.5079	10.4774	10.8512	10.2856	10.5105	10.7427	11.1067	11.0503	11.1968	10.895	10.8742	10.5087	10.6397	9.92785	8.90498	11.2304	11.2015	8.73424	10.9679	11.4509	10.84	11.4115	10.7405	11.2618	11.2231	11.0127	11.0533	11.2288	9.00559	10.186
AB488780	0.727994	0.0310329	0.0626462	9.50807	8.78008	8.97754	9.54952	10.3548	7.61441	9.96042	10.0486	9.30951	9.80037	9.8242	8.42288	9.85415	9.78021	9.80389	9.38812	9.84662	9.45743	10.081	9.92842	9.5407	9.86271	10.3051	10.0146	10.5492	10.2992	9.9674	9.4842	9.72218	8.75256	7.44084	10.4697	10.5739	7.60491	10.0432	10.649	10.3388	10.6249	10.1973	10.7078	10.3206	10.0575	10.3693	10.6106	8.68583	9.60239
ABCF1	0.903521	0.00169658	0.00568507	11.1549	10.2513	11.0639	11.4468	11.7796	10.7955	11.4384	11.4139	10.8253	11.5452	11.8929	10.873	11.4989	11.5235	11.2179	11.123	11.5258	10.975	11.8616	11.7917	11.1314	11.5403	11.9952	11.5085	11.7796	11.6609	11.4724	10.5921	11.2767	10.7834	9.34111	11.4559	11.2377	10.417	11.6127	11.9614	11.8929	11.8868	11.5334	11.7584	11.7952	11.9125	12.2607	12.1127	10.067	10.7042
ABHD1	0.759173	0.000333357	0.00141558	8.18845	7.42928	8.1412	8.0392	8.72415	8.30794	8.34683	8.15781	7.98103	8.38959	8.39969	8.07202	8.27368	8.17718	8.26762	8.03248	8.33147	7.87835	8.7274	8.77021	7.87936	8.64348	8.6826	8.49712	8.48807	8.5149	8.38504	8.10402	8.18178	7.83379	6.53392	8.38662	8.85337	8.27208	8.47381	9.05856	9.00559	9.15165	8.49416	8.64249	8.5795	8.91005	8.98563	9.10028	7.41695	7.54462
ABHD12	1.01557	2.31403e-10	4.10109e-09	9.0559	8.04033	8.46541	9.44676	9.04267	8.14484	9.22911	9.27339	9.52554	9.00559	9.17554	8.54537	9.48036	9.14494	9.03078	9.10752	9.02273	9.1372	9.34621	9.23849	8.78827	9.22131	9.40591	9.80091	9.51054	9.24896	9.22775	8.93008	9.29102	9.17087	7.98617	9.79666	10.076	8.90123	9.00885	9.48542	9.10535	8.90591	9.67773	9.14723	8.966	8.99942	9.02369	9.2591	8.58588	8.57389
ABHD17C	1.18175	5.99658e-06	4.09925e-05	8.31162	7.12987	9.02338	7.4684	7.5397	8.17354	8.01017	8.69692	9.01696	7.71592	9.37116	8.73474	8.00315	8.6677	7.74578	8.5327	8.77646	7.63693	7.90492	8.06003	8.77671	8.32201	8.54666	8.00828	7.56956	8.36988	7.1659	8.967	8.09476	8.68797	9.84878	9.3497	6.9039	8.13033	8.13831	7.27206	7.20961	8.45071	7.58406	7.06951	7.86789	8.3552	7.54195	7.01973	8.98278	8.51868
AC002064.5	0.811761	0.000268899	0.00117569	6.45899	5.64723	6.59914	6.47215	7.05835	6.5355	6.73033	6.41493	6.68018	6.37341	7.00006	6.47325	6.40722	6.81866	6.09742	6.33293	6.78641	6.30297	6.71179	7.33303	6.65058	6.44802	6.91206	6.67689	6.48999	6.38936	6.5633	6.65946	6.28086	6.24075	6.87291	6.47304	6.83015	6.81116	6.77355	7.24634	6.78147	7.40453	7.18062	6.82353	6.74977	7.00825	7.76627	6.96823	5.85144	5.48603
AC003986.5	0.94411	0.0158668	0.0363687	9.24928	8.30517	9.30696	9.81932	10.6141	8.78954	9.85742	9.57923	8.53416	9.98562	10.3248	8.725	9.58304	9.97267	9.4753	8.91383	9.61554	8.80103	10.5901	10.2472	9.39883	10.3224	10.4	9.63105	10.0229	10.2772	9.75482	8.89069	9.12903	8.79338	9.15973	9.50752	9.49097	8.9146	9.88473	10.3564	10.2582	10.2732	9.56594	9.84558	9.98779	10.0486	10.6106	10.5115	7.42522	7.86284
AC005838.2	0.622905	0.000561206	0.00221768	5.96898	5.34607	5.93911	5.4701	5.89288	6.19501	6.55704	5.32742	6.04884	6.08754	6.41418	5.78825	6.13585	5.59104	5.98231	5.54687	5.30465	5.38268	5.26059	6.46816	6.10494	5.99324	6.56652	5.8692	6.27302	7.00067	6.02018	6.04728	6.02399	5.9419	7.29798	5.93303	6.80865	6.7442	6.34318	6.11599	5.81841	6.03201	6.30618	6.33529	6.57946	6.84498	6.87389	6.13631	5.30347	5.55626
AC007292.3	1.27093	3.15427e-15	1.42628e-13	7.79954	6.52862	7.77507	7.59837	7.5211	8.31888	7.77184	7.98941	8.05693	7.52639	7.78897	7.89675	7.43232	7.84425	7.99235	8.70989	7.95353	8.19942	8.05957	7.68782	7.80114	7.47427	8.11038	7.99571	7.37604	8.00046	7.95932	8.01348	8.37175	8.11156	7.17849	8.24544	8.44751	8.15997	7.96565	7.78019	8.02974	8.2116	7.30284	7.18764	7.96213	7.83359	7.48097	8.10434	7.49917	7.38309
AC007365.3	2.82777	3.06583e-11	6.41776e-10	8.31815	5.49038	7.82087	8.52726	9.42959	6.02359	8.69666	9.19304	8.37794	8.66547	8.5941	7.31995	8.98278	8.75492	9.19677	8.72391	8.70068	8.39946	8.93503	8.66594	8.30222	9.36808	9.19712	9.11596	9.52523	9.36171	9.11573	8.91754	8.99276	8.42332	4.87274	9.57224	9.74631	6.06477	8.79981	9.2526	8.76692	9.5182	8.95625	8.75005	9.00497	8.98198	9.14792	9.26332	6.82529	7.46631
AC009237.8	0.893766	0.000426139	0.00174388	7.3249	6.43113	6.45981	7.49665	7.5127	7.63444	7.89525	5.97744	7.70203	7.22773	7.81241	7.8212	7.4842	7.33345	6.81175	6.26691	6.53299	7.83922	6.80109	7.07885	7.74434	6.79728	8.00147	6.21544	6.0614	7.26652	6.23902	7.59394	7.86682	7.33324	7.2959	6.3909	6.53694	7.76194	6.81967	7.76996	7.03823	6.19226	6.88149	6.83517	6.89151	8.60598	7.30588	6.86318	7.3833	7.69248
AC011997.1	0.765914	0.00131677	0.00458914	5.80917	5.04325	5.9572	5.44928	6.44573	5.54656	5.44577	5.74764	5.50738	5.7237	6.38213	5.63233	6.10318	5.89288	5.96065	5.71317	5.75146	5.73075	6.1221	6.36972	6.1682	6.5317	6.22271	6.13712	6.91717	6.22336	6.33069	5.54095	5.36599	5.37735	4.69823	5.94327	5.18861	6.05755	5.89989	6.59508	6.07816	6.95742	6.3001	6.82333	6.08292	5.72612	7.0611	6.75874	4.53836	5.34356
AC017002.2	0.745213	1.79239e-06	1.40109e-05	6.65284	5.90763	6.18665	6.1831	7.54462	6.20691	6.64648	6.31082	6.86526	6.44823	6.57229	6.38213	6.6224	6.56309	6.76335	6.7203	6.52353	6.4963	6.78706	6.71802	6.37382	6.54034	6.76542	7.02755	7.48941	6.69837	6.68841	6.65133	6.44513	6.79543	5.97162	6.94555	6.80188	6.36293	7.04412	7.65007	7.23867	7.56974	6.90071	6.56028	6.75384	7.09892	7.47488	7.40613	6.15374	6.3534
AC018816.3	1.33506	0.00326936	0.00988411	9.37904	8.04399	9.00497	9.95338	10.341	9.38479	10.0975	10.139	9.31489	9.83464	10.3403	8.86595	9.93627	10.0287	9.95088	9.02369	10.0958	9.20235	10.3961	10.452	9.46644	10.0969	10.7253	10.2914	10.5178	10.245	10.0141	9.02273	9.41502	8.84816	7.25591	9.80629	10.0904	9.30115	10.104	10.5424	10.5115	10.5749	10.0975	10.1309	10.1547	10.172	10.5339	10.6347	7.3744	8.11348
AC024560.2	1.56201	4.59593e-15	2.01933e-13	8.40988	6.84787	8.67952	8.60779	8.9386	8.54832	8.71199	8.87837	8.50873	8.71042	8.45347	8.27208	8.35206	8.61667	8.55529	8.6469	8.64871	8.17917	8.725	8.48828	8.68986	8.9343	8.63357	8.68002	8.68439	8.50508	8.58422	8.54832	8.60233	8.59741	5.99003	8.6234	8.50269	8.8124	8.1644	8.48081	7.90373	8.79421	8.67734	8.60352	8.47333	8.65883	8.49006	8.6144	8.09932	7.90796
AC069277.2	1.32083	0.00160929	0.00543799	6.02611	4.70528	5.10057	4.96196	4.66791	6.9253	4.73737	5.17498	5.49904	7.5713	7.2818	6.82777	5.99961	8.5304	4.97397	5.85752	6.45452	7.09389	6.25516	5.39521	6.63728	6.96466	5.11854	6.53025	6.0652	4.65674	6.64272	5.8582	8.18694	5.29666	10.6671	5.55053	5.67312	9.14324	6.93701	5.38746	6.44111	4.82294	5.2446	5.62041	7.34623	4.85842	6.73008	5.19304	5.05539	6.45408
AC079741.2	0.919341	2.87353e-09	4.07603e-08	6.38078	5.46144	6.60096	6.50191	6.48029	6.9226	6.10318	6.40037	6.60604	6.32042	6.7315	6.93623	6.26756	6.75457	6.80953	6.19856	6.13846	6.81233	6.17529	6.14321	6.34963	6.45773	6.20895	6.5698	6.21948	6.41257	6.26795	5.92665	7.01551	7.19324	6.41314	6.13311	6.66393	6.47389	6.53234	6.82298	6.21182	6.2182	5.97647	6.36063	6.28925	6.44422	6.23659	6.02263	7.20999	6.09214
AC092660.1	0.82876	0.0234676	0.0499572	9.23088	8.40212	9.2086	9.54606	10.2914	8.77219	9.83069	9.17913	9.1394	9.83278	9.92785	8.56403	9.6295	9.66613	9.39284	9.13525	9.68499	9.07387	10.1411	10.4009	9.5373	9.80437	10.0141	9.41853	10.2251	10.468	9.72916	8.87887	9.52942	8.807	6.46834	9.38395	9.64709	8.77187	9.81487	10.1014	10.0787	10.4457	10.2479	9.85972	10.1295	10.3926	10.5628	9.82062	7.21193	8.63936
AC104667.3	3.85272	1.49907e-16	8.63948e-15	9.94219	6.08947	9.7399	10.0676	10.9654	9.00655	9.87296	10.2022	9.76852	10.2896	10.7659	9.13452	10.3277	10.491	10.5232	9.82702	10.488	9.7937	10.616	10.4993	9.88959	10.1997	10.7671	10.6611	10.4139	10.8973	10.3198	9.85972	10.0474	9.54523	4.80524	10.6559	10.6347	8.82626	11.1081	11.4299	10.9188	11.372	10.5021	10.6983	10.8579	10.9057	11.0757	10.7967	8.81466	9.90675
AC145343.2	0.699024	0.0337788	0.0669839	7.23192	6.53289	6.94975	7.79374	7.63427	7.05896	6.81056	8.16282	7.51836	7.24408	7.94261	6.92123	7.14445	7.30305	7.38351	7.90492	7.15475	6.81133	8.59741	8.21867	6.93482	7.36882	8.49214	7.8288	7.65828	7.13121	7.67734	7.85823	7.83613	7.73624	3.41004	8.13414	7.85932	7.24785	7.67337	8.8003	8.49277	7.61461	6.97024	7.92876	6.44637	7.04846	8.12641	8.85287	6.00472	6.0587
ACAT2	0.611024	0.0346459	0.0683656	9.62987	9.01885	9.25216	10.164	10.2472	7.82087	9.70899	9.785	9.24999	10.1198	9.97149	8.80641	9.85252	10.0342	10.0146	9.38962	9.85092	9.41057	10.1124	10.0247	9.56969	10.5249	10.5574	9.62365	10.6961	10.5035	10.2427	9.21654	9.71453	8.92433	8.69792	9.58585	9.85532	7.83556	10.1679	10.423	10.2756	10.2217	9.82062	10.6799	10.2534	10.5727	10.6356	10.4607	9.14887	9.76889
ACE2	0.840385	0.0144005	0.0336105	7.54413	6.70374	7.35756	8.03179	8.48201	6.11815	8.16649	7.98428	7.78239	8.1014	8.46336	6.43822	8.05153	8.30263	7.87139	7.67194	8.12277	7.64504	8.84999	8.08518	7.56592	8.26698	8.54279	8.27281	8.35836	8.03525	8.07428	7.66282	7.81642	7.30497	7.17629	8.16785	7.919	6.29273	7.88327	8.33089	7.89068	8.27429	7.51014	8.10675	8.14649	8.02005	8.3191	8.23575	6.7226	6.62475
ACN9	0.713513	0.00336631	0.0101353	8.04927	7.33576	7.43308	8.23761	8.05777	8.5864	8.14142	7.49424	8.39471	8.35705	7.4747	9.14392	8.59066	7.21575	7.76996	8.91435	7.96501	8.21699	7.84445	7.08465	8.11101	7.3928	7.39703	8.02872	7.55393	7.98941	7.07457	8.31271	8.23983	7.625	8.30139	7.53182	7.67986	8.8982	8.12408	7.36685	7.46085	6.97762	7.72681	7.50226	7.88269	7.19669	6.39283	6.68773	8.7331	8.58986
ACOT8	0.747447	0.000865071	0.00320428	8.88129	8.13385	8.33193	8.7448	9.24827	7.36824	9.14759	9.11692	8.36427	9.25216	9.13421	8.30609	8.90907	8.90649	9.20198	8.89788	9.01067	8.52613	9.16634	9.11124	8.80725	9.1941	9.29862	9.14564	9.56088	9.73407	9.19304	9.30882	8.87263	8.45451	7.99387	9.53986	9.72001	7.47966	9.18249	9.37883	9.32231	9.67878	9.19814	9.40636	9.1742	9.34299	9.44353	9.16505	7.92204	9.03985
ACPT	0.88683	0.00141565	0.00487657	9.10605	8.21922	9.96843	9.39206	9.52477	10.0197	9.19479	8.92169	8.6993	9.79278	9.91301	8.66282	9.53183	9.56088	9.43864	8.65622	9.37546	9.28695	9.39475	9.8672	9.20566	9.31773	9.66613	9.72717	9.57794	9.57354	9.35823	8.57508	9.3865	8.79606	7.91751	9.24595	9.19042	9.845	9.55385	9.47613	9.54787	9.73934	9.83802	9.01759	9.48088	9.72537	9.91854	10.0963	8.02454	8.50557
ACSM2A	0.742111	3.95512e-11	8.13787e-10	6.08346	5.34135	6.73207	5.99094	6.14498	6.50849	6.75136	5.88864	5.93588	6.04972	6.26246	5.93987	6.10766	6.08687	5.87086	6.4963	5.99653	5.81859	6.19166	6.58964	6.00076	6.16975	6.53044	5.70374	5.93911	6.22795	5.9021	6.13075	5.87219	5.83104	5.55979	6.42656	6.53299	5.90949	6.01223	6.55098	6.12916	6.12125	6.09656	5.79919	6.23464	6.06223	6.37464	5.8247	6.17411	5.82883
ACSM2B	1.11755	2.2306e-06	1.69781e-05	6.31619	5.19863	5.9251	6.69029	6.81396	5.90647	5.70035	6.19575	5.8568	5.9205	6.60837	5.73697	6.65432	6.226	6.72791	6.1173	6.35707	6.31535	6.6036	7.07859	6.13116	6.26944	7.93118	7.6088	5.8054	5.99458	6.5808	6.51409	6.40786	6.5589	5.99128	7.29781	7.16336	6.178	6.97005	8.07515	6.20536	6.27857	6.22271	7.04642	5.72484	6.9039	6.90092	7.72276	5.54292	5.39552
ACSM5	1.95793	3.5663e-14	1.30139e-12	8.23547	6.27754	8.14321	8.49462	8.58937	7.54887	8.49345	8.47044	8.54598	8.56668	8.47509	8.22835	8.47333	8.63473	8.83965	8.61964	8.75285	8.51162	8.44352	8.80915	8.39509	8.60381	8.67952	8.79118	8.70517	8.74648	8.56836	8.19442	8.7788	8.42605	6.84292	8.61617	8.79338	7.52519	8.53178	8.98827	8.60721	9.2899	8.65336	8.64465	8.52076	8.44643	8.30771	8.65726	7.31956	7.59999
ACSS2	0.609753	0.0218808	0.0471717	10.0602	9.45041	9.62235	10.1836	10.3967	8.465	10.1262	10.1137	9.9125	10.3034	10.33	9.15907	10.1694	10.2921	10.5173	9.71052	10.1316	9.93859	10.5477	10.0792	9.99573	10.3984	10.604	10.0427	10.5674	10.6849	10.3699	9.85415	10.0513	9.37838	8.98853	10.2582	10.3362	8.34588	10.6886	10.7473	10.6499	11.1429	10.8289	11.1444	11.1444	11.3097	11.0614	10.9034	9.41093	10.4966
ACTL6A	0.656087	0.00103539	0.0037348	9.80321	9.14712	9.33157	9.914	9.54477	9.79278	10.5105	10.1086	10.0754	10.0893	10.0273	10.776	10.036	9.11094	9.3415	10.4834	9.27783	10.7649	9.6295	9.19747	9.9674	9.67236	9.40178	9.66812	9.4734	9.32231	9.50071	9.5424	9.88473	10.7898	9.99187	9.5424	9.11157	9.44208	9.53055	8.95407	9.57106	8.01818	8.82385	10.0664	9.12767	9.32071	9.9357	9.63527	9.9753	10.2772
ACTR3BP2	1.21512	1.10623e-10	2.08661e-09	7.76316	6.54804	7.88482	7.89904	8.46253	7.57791	8.18137	7.86992	7.69107	8.40774	8.28349	7.45965	7.98224	8.1527	8.01559	8.03265	8.00527	7.84038	8.14525	8.40185	7.53637	8.09224	8.07553	7.83007	8.20389	8.21356	7.88526	7.75368	7.78261	7.3643	7.18874	7.70354	7.66443	7.22534	7.92599	8.30315	7.95113	8.38642	8.20544	7.85989	7.93255	8.2346	8.43265	7.67734	6.75893	7.18798
ACVR2B-AS1	1.05581	0.0217399	0.0469298	9.12377	8.06796	8.75199	9.54477	10.3034	7.36057	9.82863	9.74934	8.70489	9.43037	10.0893	8.2438	9.70585	9.89584	9.93471	9.14942	9.73454	8.93767	10.4793	10.2029	9.30989	9.89815	10.514	9.93859	10.1383	10.0658	9.85802	9.128	9.26371	8.60571	7.34361	9.96305	10.0513	7.35636	9.72164	10.2764	10.0169	10.5165	9.23849	10.33	10.0588	10.0185	10.4147	10.6141	7.43944	7.89547
ACVRL1	0.972294	5.31623e-15	2.28209e-13	7.32699	6.3547	7.71886	7.34065	7.23791	7.71049	7.12865	7.16302	7.35315	7.30101	7.45265	7.50948	7.1706	7.23159	7.74592	7.33649	7.66598	7.21825	7.12688	7.28787	7.09696	7.25611	6.91547	6.81307	7.07123	7.07081	7.15274	7.00478	7.18207	7.20725	8.10806	6.76436	6.94921	7.93564	7.13862	7.21154	7.15258	6.99985	7.47347	7.3928	7.10811	7.14289	7.3884	7.24808	7.64935	7.32494
ADAM21	0.589129	0.0322892	0.0646858	7.28523	6.6961	7.10902	7.7679	7.80432	6.91467	7.82496	7.66203	7.0046	7.73751	8.12798	6.84588	7.64248	7.90243	7.27475	6.99623	7.58426	7.06685	8.00592	8.0967	7.30811	7.59142	8.12798	7.87959	7.61627	7.51776	7.61503	7.22322	7.95047	7.15754	6.54287	7.90738	7.73096	6.92004	7.86992	8.19068	7.85473	7.83656	7.93756	7.73646	7.75894	7.43086	8.21461	8.23384	6.16587	6.4409
ADAMTS2	1.02466	4.49067e-07	4.01788e-06	8.32341	7.29875	7.83904	8.39322	9.25675	7.88601	8.44643	8.43009	8.07243	8.46014	8.68561	7.65497	8.74505	8.29561	8.3756	8.29646	8.59762	8.2383	8.67536	8.84788	8.38132	8.61993	9.05824	8.89038	8.37364	8.48127	8.6645	8.2202	8.52362	8.22176	8.53516	8.3463	9.13823	7.9336	8.58512	8.91383	8.811	8.79957	8.87183	8.67806	8.35137	8.55529	9.55617	9.0576	7.27788	7.56072
ADCY5	0.853014	3.12263e-08	3.56516e-07	7.68492	6.83191	7.40057	7.59431	8.1182	7.50891	7.8178	7.8649	7.36272	7.79352	7.86064	7.32036	7.52198	7.65267	7.77691	7.75754	7.71905	7.67659	8.07644	8.03983	7.65887	7.80219	8.0439	8.16863	7.97743	8.04299	7.54442	7.5661	7.72411	7.75199	8.07495	7.87915	8.03179	7.29375	7.7787	8.33069	8.01625	8.51074	7.4517	7.76466	7.42522	7.54229	8.11101	8.27258	7.00935	7.04144
ADCYAP1R1	0.828088	9.80787e-05	0.000489858	8.62053	7.79245	8.38725	8.70459	8.84172	8.01036	8.66573	8.83125	8.52944	8.69086	8.66332	7.98428	8.70765	9.11954	9.00341	8.64068	8.69278	8.51032	8.60213	8.74192	8.76905	8.87489	8.88093	8.79935	8.96638	8.9706	8.98336	8.75341	9.12665	8.16828	7.67734	8.88243	9.53986	7.37982	8.85972	8.84083	9.04806	9.3185	8.8495	9.49429	8.9338	9.00004	8.88463	8.86223	7.98635	8.81131
ADH7	0.812136	3.70342e-06	2.66543e-05	6.36564	5.5535	7.43568	6.28943	6.69754	6.28151	6.479	6.70667	6.43028	6.52378	7.18519	6.21798	6.43137	6.47237	6.02988	6.36081	6.74397	5.98495	6.6281	6.59914	6.21524	6.29026	6.30471	6.45654	6.13544	5.92738	6.25576	6.98735	5.96559	6.52434	7.98067	6.37136	6.36536	6.15413	5.97647	6.42899	5.65027	6.36451	6.31964	6.27121	6.10382	6.12703	5.87019	7.97882	6.12441	6.02243
ADIRF-AS1	1.04342	0.00107383	0.00385701	9.32215	8.27874	9.88907	9.46923	9.81431	10.3175	9.75432	9.44513	9.3371	9.61916	10.3686	9.04301	9.92343	9.49631	9.64086	9.28206	9.30254	9.5882	9.37434	9.86598	9.29961	9.22942	10.0925	10.5115	9.35009	9.48942	9.68647	9.6111	9.81284	9.63767	7.55082	9.97081	10.0293	10.607	9.57224	10.199	10.3182	9.60737	10.2029	9.29862	9.52477	9.39757	9.72164	10.599	8.26805	8.58468
ADPRHL1	1.23834	2.07576e-14	7.98207e-13	7.94059	6.70225	8.24297	8.1767	8.18783	8.17171	8.07164	7.98026	7.73352	8.1091	8.34155	7.86704	8.21637	8.20868	8.11855	7.77058	8.07856	8.23101	8.33887	8.18878	7.88984	8.05857	8.24963	8.59312	8.11938	8.21699	8.09873	8.02026	7.98405	7.96411	6.5734	8.20826	8.2459	8.26919	7.96411	8.29971	7.96437	8.07202	7.95841	8.10501	7.66422	7.78204	8.08356	8.52969	7.77166	7.25463
ADRA2C	1.30808	1.67932e-05	0.000104184	7.82254	6.51447	8.57456	8.6682	7.98658	8.66309	8.08869	6.16775	8.14713	9.10192	7.97706	8.1139	8.29204	7.44432	8.3482	5.5674	6.66279	7.67565	8.51894	6.96291	8.4111	8.27385	8.44028	7.17681	8.02501	7.75139	7.70468	8.02128	7.58938	5.92442	9.41771	8.02254	8.41155	7.69532	7.47892	6.15851	6.19166	7.14703	7.60557	7.86064	7.70804	8.35137	7.14593	7.83483	8.64249	8.62721
ADRB3	1.55066	3.32736e-05	0.000190802	8.75718	7.20652	8.91858	9.39167	9.83415	8.06295	9.32037	9.38085	8.74832	9.50111	9.11351	8.19515	9.38578	9.31377	9.40789	9.17053	9.31489	8.97937	9.46324	9.25838	9.17364	9.512	9.81534	9.98143	9.74579	9.52358	9.65342	9.08051	9.53306	8.5913	4.40969	9.72001	9.72442	7.51589	9.05646	9.49355	9.07811	9.68033	9.00885	9.49185	8.85536	9.11157	9.41502	9.43131	7.51467	7.83656
AF001548.5	0.665574	0.00110453	0.00395055	7.46264	6.79707	6.91323	7.6517	8.00749	7.33147	7.06009	7.42277	6.7652	7.56255	7.30481	6.83478	7.71291	7.34786	7.15475	7.49645	7.23316	6.88311	7.10447	7.59859	7.3189	6.93387	7.56667	8.18386	7.31038	7.3964	7.34762	7.56747	7.88501	7.51014	4.89211	7.71069	8.25536	7.16662	7.68869	8.28462	8.11591	7.85159	7.184	7.76563	7.55918	7.69762	8.29271	7.5713	6.82333	6.41357
AF086102	1.53878	7.84033e-10	1.24747e-08	8.12698	6.58819	8.08757	8.35206	8.77443	8.59042	8.10402	8.06542	7.91727	8.35627	8.67237	7.63216	8.17145	8.07576	8.30098	8.0439	8.34319	8.11453	8.7225	8.92756	7.92739	8.2118	8.46811	8.64641	8.52882	8.38212	8.63846	8.16767	8.33691	7.89675	6.71886	8.56049	8.34976	7.23419	8.44665	8.71547	8.89499	8.98707	8.91206	8.54811	8.96758	8.52771	9.01228	8.61134	7.47589	7.39312
AF086288	1.12759	1.27984e-12	3.44502e-11	6.99506	5.86747	8.0437	7.55843	7.24946	7.66241	7.17992	6.98	7.34048	7.20725	7.08666	7.18711	7.2818	7.29375	7.14682	7.19726	7.25569	7.1585	7.15258	7.21338	7.14265	7.04524	7.06434	6.66967	7.11087	6.92905	7.17828	6.9889	7.09783	7.47407	5.92004	7.27019	6.74474	7.24273	6.75457	6.52763	7.26822	6.37153	6.81948	6.48873	6.9826	6.61948	6.95315	6.51118	7.2619	6.49647
AF186192.1	2.60594	2.37555e-08	2.78731e-07	9.40321	6.79727	9.13027	10.0462	10.7515	7.76563	10.0507	10.17	9.09456	9.98143	10.4139	8.53542	9.88161	9.98993	10.0191	9.03871	9.86119	9.28317	10.8067	10.2847	9.51054	10.3786	10.8134	10.2551	10.7671	10.6701	10.4509	8.9322	9.48463	8.28376	6.76363	9.92664	9.87972	7.29095	10.1928	10.3353	10.5061	10.6886	10.0664	10.7885	10.4202	10.386	10.9095	11.1532	7.45265	8.53371
AF279780	1.14241	0.0134504	0.0317853	7.62274	6.48032	7.40183	7.81726	8.89069	6.84369	8.25421	8.29928	7.06646	8.43338	8.7107	7.19001	7.83886	8.24885	8.17102	7.6509	7.96969	7.86747	8.88801	8.72358	7.9959	8.372	8.76667	7.79624	8.8923	8.68384	8.21867	9.45136	7.35826	7.19749	5.22554	8.2296	8.11554	7.41373	8.06482	8.63622	8.38168	8.99462	8.348	8.67734	8.60748	8.60538	9.09029	8.39302	5.45217	6.24943
AFAP1L2	0.96255	0.000590625	0.00231634	8.1228	7.16025	7.54511	7.92578	8.6067	7.07798	8.49297	8.39906	7.66088	8.52818	8.7598	8.01379	8.06925	8.05237	8.49144	7.82626	8.09296	7.88948	8.78095	8.5368	7.70671	8.03102	9.02865	8.74144	8.52145	8.61088	8.2889	7.68974	7.92435	8.0771	7.77338	8.3507	9.00624	7.79949	8.72276	9.04785	9.05049	9.13148	8.27611	8.72714	8.52145	8.49394	9.62235	9.39716	6.54883	6.60582
AFF2	1.77873	7.39271e-18	5.43988e-16	8.02624	6.24751	8.15003	8.3191	8.2521	7.87317	8.17207	8.32311	8.24401	8.17501	8.31969	7.87364	8.02337	8.15292	8.28787	8.3586	8.10501	8.15545	7.93542	8.30817	7.93756	8.19336	8.24863	8.25957	8.01036	8.03565	8.34134	8.34564	8.35563	8.38859	5.50776	8.2538	8.31047	7.81489	8.35472	8.46385	8.35018	8.08066	8.2825	8.03773	7.99439	8.20846	8.23384	8.45941	7.67565	7.95373
AFP	1.09553	2.02333e-09	2.97004e-08	6.30674	5.21121	6.46641	7.55471	6.58428	6.44337	6.44337	7.07697	6.95827	6.19015	6.32065	7.06397	6.32951	5.89435	6.05251	5.48049	6.29805	5.69516	6.23322	6.19821	5.84525	6.56652	6.15682	6.26923	5.98781	6.21587	6.91874	6.11748	5.92257	6.77719	5.62874	6.08615	5.94253	6.32691	6.09893	5.5165	5.92589	5.54656	6.30957	6.31027	6.06369	5.57801	5.54166	5.88438	6.01492	6.90406
AFTPH	1.45471	4.29982e-12	1.04106e-10	11.0658	9.61113	10.8607	11.2066	11.3611	10.3786	11.1616	10.9081	10.9868	11.055	11.594	10.545	11.1932	11.5629	11.1121	10.8219	11.1633	10.9948	11.7302	11.1671	11.0816	11.4361	11.8996	11.1395	11.6756	11.4964	11.4468	10.7286	10.7885	10.56	10.3507	11.0318	10.9584	10.3293	11.4487	11.7056	11.5032	11.7263	11.3963	11.7621	11.7419	11.8495	12.0027	11.9043	10.6118	10.9188
AGMAT	0.937362	3.42821e-06	2.49403e-05	6.878	5.94064	7.19391	7.01356	7.11808	7.2454	6.67814	6.75401	6.08146	6.282	6.81887	6.83176	7.66465	6.87033	6.53127	6.18332	5.99438	6.76175	6.4209	6.56085	7.33862	7.1411	6.5477	7.06434	6.74456	6.07885	6.38233	6.88713	6.56884	6.46951	5.98707	6.75569	6.07229	6.62085	6.94921	7.00614	7.64268	5.93821	6.17689	6.70227	7.40126	7.10366	6.49784	6.94555	6.70964	8.03283
AGPAT1	1.91077	6.05019e-15	2.55875e-13	10.6738	8.76305	10.4817	10.6983	10.9188	9.9674	10.9643	10.7705	10.5096	10.868	10.9629	10.1881	10.7515	10.8566	10.8594	10.4918	10.8717	10.4344	10.9568	11.1377	10.6713	10.9896	11.1018	11.0003	11.055	11.2147	10.868	10.359	10.5359	10.1283	8.94955	10.9924	11.089	9.84714	11.2231	11.3413	11.3812	11.7558	11.0402	11.2602	11.5755	11.494	11.3316	11.3832	10.1331	10.594
AGPAT2	0.847872	2.92623e-07	2.71501e-06	8.98659	8.13871	9.49588	8.7331	8.59962	9.35784	9.07227	8.98951	9.52042	8.90218	8.72871	9.724	8.77752	8.86314	9.44208	9.57189	8.90527	9.32343	8.31932	9.23725	9.17878	8.77855	8.35941	8.98278	8.36236	8.64641	8.63798	9.47613	9.50455	9.82016	8.3965	9.11157	9.44313	9.50455	8.78206	8.46995	8.76769	8.21314	8.53416	8.33458	8.22726	8.40185	8.21419	8.26162	9.02099	9.22632
AHCY	0.818619	0.000661597	0.00254666	10.167	9.34837	10.2175	9.59084	9.63478	10.7495	10.0715	10.2881	10.2865	9.95863	9.87446	10.3539	10.2336	10.4006	10.3462	10.0129	9.61638	10.2414	10.0163	9.48859	9.74291	10.5486	9.00655	9.74344	10.5378	10.1881	9.68703	10.0701	11.4115	10.7438	10.7495	9.38169	9.19448	10.7834	10.4765	9.97877	9.69118	8.88186	9.35861	9.29245	9.77926	8.79523	9.93859	9.12733	11.2377	11.1847
AIF1L	1.93329	4.71583e-11	9.54851e-10	8.90176	6.96846	10.1981	8.32355	8.42791	9.14887	9.8672	7.74452	10.373	9.07913	7.9177	10.7209	9.08246	7.95865	8.73333	8.88546	8.14567	9.87025	8.9898	7.83166	9.27783	9.26371	8.26162	9.36734	8.38442	9.37928	9.10693	9.03682	8.96565	8.88513	9.87341	8.5046	10.1124	8.16844	8.41945	7.73989	8.11368	8.24863	9.85742	8.21107	8.07071	7.82168	8.69771	8.55203	9.92664	9.43684
AIFM1	0.742475	0.000740172	0.00281081	8.95401	8.21154	9.22566	9.00171	8.50653	9.63859	9.58304	9.53263	8.69305	9.44313	9.44938	9.23696	9.76624	8.83748	8.65984	9.02902	8.25309	8.91435	8.9429	7.94813	9.46035	9.01814	7.87077	8.7958	8.52169	7.54478	8.82745	8.98707	9.05736	8.42144	9.70728	8.88825	9.03078	8.6778	9.69964	9.32071	8.47541	7.24746	9.30151	8.81664	9.4673	7.69681	7.68265	8.92598	9.19712	9.14816
AIM2	0.839123	0.000291318	0.00126071	6.94498	6.10586	6.76401	6.26963	6.528	6.37153	6.85232	6.98713	6.9826	6.74862	7.65345	7.17043	7.61075	7.42627	6.68539	6.93247	7.78595	7.07041	7.12311	7.77698	6.31211	7.21554	7.62877	7.97377	6.64472	6.75551	7.32966	7.13041	6.479	7.08862	7.49519	7.86081	7.19491	6.99369	6.56456	7.27849	6.61302	6.76868	7.2717	7.40147	6.54363	6.75874	6.96053	8.44779	6.19974	6.86732
AK022793	0.737501	2.59793e-08	3.02035e-07	6.62518	5.88767	6.28497	6.37551	6.4766	6.25699	6.51427	6.40132	6.479	7.43438	6.78147	7.1	6.79647	6.63772	6.4068	6.93083	6.54265	6.73362	6.51671	6.70418	6.37675	6.64591	6.81325	6.66673	6.1389	6.3604	6.60059	6.85743	6.32249	6.31193	6.71423	6.6397	6.73225	6.25953	6.72982	6.41531	6.52535	6.85939	6.44513	6.42236	6.64882	6.42638	7.3232	6.83493	6.09502	6.93564
AK055981	0.639145	0.0081951	0.0213145	8.86899	8.22985	8.91884	8.99393	9.28952	8.60011	8.90739	9.04785	9.13027	9.00684	9.48382	8.54519	9.15629	9.29961	9.0576	8.94691	9.37767	8.88463	9.41057	9.22699	8.64899	9.17226	9.55139	9.19782	9.33307	9.15764	9.13786	8.99276	8.97576	8.60927	8.88309	9.35582	9.15006	8.40317	9.19042	9.64317	9.31925	9.88216	9.2187	9.3574	9.42124	9.39167	9.56823	9.50752	7.81746	7.76563
AK093205	0.930086	1.48089e-05	9.27785e-05	4.50419	3.5741	5.03924	4.82087	5.99151	4.68252	4.32587	4.60956	4.28464	4.53836	5.28759	3.90224	4.37433	4.57506	4.85423	4.33846	4.58435	3.92316	5.97884	4.9365	4.41987	5.30895	4.77714	5.52705	4.48668	5.29738	4.49926	3.72087	3.84523	3.83052	5.9923	4.55512	4.65134	4.44257	4.10433	4.53661	3.80346	6.0571	3.89345	4.47888	4.41647	4.31368	4.43602	3.70276	4.45129	3.56841
AK093362	1.10531	2.28564e-05	0.000137186	6.21688	5.11156	6.24154	6.03957	6.65662	6.87939	5.71974	5.85659	5.69003	6.89081	6.94035	5.46087	6.40434	6.35787	5.96984	5.42068	6.15158	5.83975	6.81908	6.61676	6.15117	5.95699	6.89558	6.14365	6.52342	6.32557	6.16883	5.64814	6.82211	5.548	6.56919	5.75962	6.21136	6.72627	6.51946	6.395	6.81732	6.87521	6.74661	6.32539	6.21296	6.79077	8.14589	7.48485	5.32637	6.28256
AK093370	0.996431	0.00568742	0.0157084	9.25731	8.26088	9.65775	9.58585	9.83123	9.20104	9.75957	9.84937	9.37838	9.62142	9.92017	9.12629	9.285	9.60067	9.61596	8.83693	9.8018	9.02799	9.81771	10.1449	9.52477	9.68033	10.0804	9.65122	9.77149	9.98202	9.71102	9.2648	9.845	8.95172	5.36424	9.87707	9.477	8.5022	9.90323	10.063	10.2099	10.4309	9.97203	10.064	10.0804	10.235	10.1301	10.2047	7.82799	8.67334
AK096592	1.26725	0.0058664	0.0161345	10.02	8.75278	9.49958	10.7427	11.0954	7.75199	10.4309	10.9008	9.86381	10.6141	10.9667	9.02995	10.5749	10.5286	10.6837	9.92287	10.5628	10.0457	11.1785	10.6377	10.0729	10.8985	11.2636	11.0045	11.2602	11.0228	11.0318	10.4556	10.6788	9.8033	6.35707	10.8669	11.0803	7.91012	10.7373	11.4319	11.1998	11.3915	10.8973	11.2028	11.1395	10.975	11.2798	11.7481	8.11239	9.16863
AK097453	3.23219	1.50791e-15	7.24812e-14	9.42163	6.18945	8.78449	9.78927	10.2725	8.08397	9.86481	9.8788	9.31965	9.67821	10.0303	8.7001	9.88689	9.90551	9.95751	9.47859	9.76261	9.64669	10.2313	9.82863	9.3404	10.2168	10.6171	10.1621	10.3926	10.2636	10.1559	9.65301	9.78527	9.14887	6.09317	10.0015	9.96259	7.90157	10.0525	10.3362	10.0537	10.5781	9.78169	10.2336	10.3051	10.3034	10.324	10.4408	8.29424	8.61597
AK7	2.42794	7.53042e-11	1.4701e-09	8.98058	6.55264	8.85171	9.40825	9.88358	7.95841	9.55341	9.41132	8.91754	9.50584	9.84609	8.28207	9.38507	9.33959	9.44556	8.90591	9.42223	8.94525	9.84021	9.66921	9.06119	9.66763	10.1235	9.77513	9.70106	9.76713	9.63527	8.82745	9.01607	8.66525	7.53769	9.71148	9.69118	7.80522	9.52213	10.1673	9.75872	10.3074	9.28623	9.89532	9.75267	9.88936	10.0899	10.2378	7.29184	7.97029
AK8	1.23143	0.000753892	0.00285817	9.48089	8.24947	9.58775	9.76713	10.2921	9.08439	9.90323	9.92712	9.64317	9.89033	10.2608	8.86194	10.1443	9.99636	9.79882	9.10301	10.1068	9.2951	10.3722	10.4139	9.64618	10.0899	10.5695	9.9255	10.3051	10.0439	10.1062	9.08407	9.37962	9.43499	5.67	9.85972	10.1235	8.86621	10.007	10.632	10.2968	10.6682	9.86071	10.1647	9.81238	10.2622	10.6952	10.5349	8.24805	8.58165
AKAP6	0.859648	0.0124863	0.030009	7.86481	7.00516	7.51878	8.3463	8.48255	7.2383	8.49898	8.43548	8.01818	8.31023	8.37875	7.5213	8.12302	8.1632	8.05462	8.12001	8.08996	8.10118	8.26656	8.39302	8.06132	8.49416	8.58468	8.89402	8.47747	8.46209	8.54156	8.32426	8.46425	8.52407	6.1675	8.63285	9.02561	7.42335	8.43682	8.81602	8.57456	8.64955	8.08846	8.37511	8.47813	8.30399	8.26528	9.06396	6.33104	6.58746
AKIP1	0.635361	0.00501915	0.0141496	9.96115	9.32579	9.65024	10.1667	10.4457	9.53055	10.0397	10.3042	9.49355	10.1102	10.2495	9.02438	10.1547	10.2472	10.1283	9.8434	9.91092	9.94257	10.4862	10.104	9.78872	10.3142	10.5592	10.2501	10.5951	10.359	10.3379	9.86661	10.1349	9.22526	8.73474	10.0033	10.3293	9.35545	10.3425	10.4139	10.3715	10.7495	10.4309	10.5538	10.5359	10.5781	10.8465	10.658	9.50031	9.76624
AKR1C6P	0.589194	8.59361e-08	8.89289e-07	6.93323	6.34403	7.08985	7.10325	6.70846	7.13098	6.78725	6.98182	7.2583	6.58845	6.8982	6.91818	7.07478	7.01056	7.19973	7.31608	6.94035	7.16336	6.70902	7.26415	7.29059	6.60542	6.7885	6.76008	6.48149	6.78191	6.87671	7.66899	7.3145	6.84669	6.01607	7.0624	7.09913	7.31568	7.00752	6.67922	6.68555	6.17041	7.06666	6.80546	7.10091	6.81332	6.66772	6.79747	6.59997	7.07755
AL133493.2	0.697399	1.83615e-05	0.000112721	6.00337	5.30597	6.02861	6.18285	6.08527	6.06334	6.16587	6.00404	5.96717	6.2003	6.22181	5.86054	6.47261	5.94327	5.95481	5.56002	5.95352	5.87891	6.03873	5.95204	5.92643	5.68978	6.12823	6.36355	5.77081	6.29231	6.15413	5.8914	6.14177	6.00589	6.33224	6.63235	6.27242	6.09127	6.48133	6.4209	6.46816	5.52641	5.45572	6.01935	6.90092	6.6457	6.51926	5.82744	5.74914	5.92874
AL590762.11	0.602429	0.00193082	0.00635644	7.06601	6.46358	6.7751	6.89465	6.43688	7.17363	6.43423	6.97024	7.50948	7.76627	7.23194	7.06723	6.50231	6.3132	6.87503	6.88694	6.16503	6.97526	6.59349	6.72915	7.05249	6.80089	6.64272	6.46719	6.55912	7.01038	6.92546	6.56287	7.45378	7.60538	7.95611	6.68145	6.98759	6.3867	6.90288	7.01374	6.95428	6.87389	6.88071	6.70268	6.85232	7.23159	6.3993	6.25436	7.93923	7.48582
AL833181	0.613704	0.0191499	0.0423988	6.83027	6.21657	6.87651	6.20774	6.45098	5.78445	6.48149	6.07648	8.40731	6.19596	7.47188	6.78324	6.32766	7.7959	7.75651	6.65214	6.62717	7.63864	5.76909	5.78234	7.08862	7.39046	7.46085	6.56784	6.55852	7.94417	7.10304	6.32766	6.67166	6.77183	8.19168	7.83461	6.53086	7.34482	5.94146	5.7237	6.30532	6.12188	8.06522	7.31755	6.13205	8.78541	5.66085	7.027	6.64821	7.24684
ALDH3A2	0.626455	0.00703976	0.0187465	10.6732	10.0468	10.2406	10.9243	11.2919	9.73588	10.8798	10.9584	10.376	10.8554	11.2015	9.98202	11.1345	11.0362	11.1707	10.3042	10.9721	10.8607	11.5334	10.8452	10.7253	11.2395	11.6529	11.0954	11.5129	11.5062	11.3216	10.4249	10.6231	10.0722	8.64009	11.0773	11.1785	9.17554	11.3635	11.4161	11.0757	11.4964	10.7705	11.1358	11.2249	11.3011	11.4964	11.47	10.2295	10.2459
ALDH3B2	1.24137	2.19026e-05	0.000132278	7.21073	5.96937	7.32226	6.70418	7.17681	6.02943	6.97276	7.58469	6.69309	6.49423	5.90301	7.28676	6.28699	7.63714	6.30821	7.57595	7.48232	6.18141	6.59125	7.47118	7.30863	7.71905	7.78528	6.39046	7.47427	5.92551	7.91573	9.29961	6.51796	7.71069	8.29345	7.3392	6.63218	6.834	6.5175	6.81927	5.98914	6.26287	8.31309	6.31454	7.01396	7.63902	6.12188	6.73547	8.02108	9.06017
ALG3	0.646624	9.49299e-07	7.90104e-06	8.89868	8.25206	8.57283	8.6675	9.03985	8.7175	8.98038	9.0633	8.86254	9.08799	8.97179	8.9589	8.59494	8.57765	8.72937	8.80103	8.59741	9.18266	8.83213	8.3965	8.90649	8.86595	9.2425	9.00885	9.15764	8.78767	8.87239	8.46541	8.69902	9.23583	8.99306	8.64925	8.49712	8.03773	8.55007	9.19546	8.71998	8.36786	8.25728	9.19782	8.50484	8.67874	8.98502	9.40409	9.67327	9.477
ALG6	0.58757	0.0213972	0.0463649	9.45037	8.8628	9.0576	9.78429	10.0179	8.16062	9.73454	9.80732	9.12353	9.80475	10.1174	8.85657	9.8018	9.87766	9.50924	9.6106	9.80654	9.42832	10.2321	9.87126	9.87927	9.86829	10.3419	9.83904	10.1673	9.81431	9.69171	9.18536	9.76168	8.91092	8.55378	9.77203	9.83361	8.15309	9.90496	10.1815	10.0397	10.1498	9.81666	9.98993	10.2479	9.94199	10.3828	10.19	8.56251	8.88513
ALMS1P	0.721332	3.26193e-08	3.69836e-07	6.81406	6.09273	7.11522	6.76565	6.50274	7.2408	6.9396	6.88848	7.28135	6.90355	6.97806	7.35578	7.11014	6.97925	7.01188	7.17659	6.85537	7.28255	6.71423	6.66279	7.15216	6.79149	6.58806	6.82436	6.38292	6.52899	6.70077	6.97236	6.72441	6.81545	6.2769	6.67941	6.54205	7.13402	6.58517	6.07776	6.37136	6.11923	6.55059	6.90053	6.56146	6.68879	6.18508	6.55201	6.72896	7.06336
ALOX12P2	1.21463	3.14903e-11	6.57388e-10	8.30626	7.09163	7.97354	8.28586	8.52428	8.21243	8.20891	8.42332	8.14963	8.085	8.58875	8.06542	8.16282	8.35919	8.41592	8.2459	8.38212	8.0079	8.76575	8.60084	8.11038	7.92041	9.06396	8.70068	8.32567	8.74067	8.41155	8.20498	8.40774	8.39302	8.23413	8.6477	8.54403	7.9294	8.6251	9.25675	9.00369	9.06175	8.46407	8.31819	8.82298	8.71597	8.96218	9.15463	7.83328	7.36586
ALS2CL	0.735551	1.19171e-06	9.74492e-06	8.20839	7.47284	7.71435	8.58447	8.67237	7.81451	8.42023	8.454	8.05821	8.20164	8.27927	7.68065	8.15229	8.22917	8.43825	8.17264	8.11278	8.00073	8.24612	8.57722	7.83574	8.23809	8.87677	8.46594	8.39175	8.23787	8.37258	8.15416	8.20592	8.15003	8.10402	8.59312	8.72611	7.89235	8.37216	8.87409	8.58711	8.76409	8.31641	8.3626	8.30817	8.99885	8.35791	8.73263	7.8288	7.52464
ALYREF	0.586322	0.0137543	0.0323563	7.24956	6.66324	7.76014	7.41253	7.10348	7.56823	7.50969	7.80095	7.50891	7.92498	6.65153	7.73603	7.32819	6.84705	7.03193	8.78515	7.01551	8.36005	7.74965	5.93821	7.97176	6.6457	6.85919	6.40552	6.50744	6.41974	7.18207	7.66711	8.10717	7.1117	7.09406	6.57441	6.9826	5.67498	7.09045	6.57214	6.85464	6.42969	6.35083	6.09337	6.98871	6.24858	6.60999	6.31681	7.46519	8.1622
AMIGO1	0.759581	0.0128403	0.0306731	9.33597	8.57639	9.11786	9.60112	10.0135	9.256	9.67166	9.54918	9.16006	10.1276	10.0582	8.85823	10.0129	9.60151	9.77766	9.47454	9.63314	9.49694	9.76526	10.2238	9.63478	9.61235	10.0367	9.88123	9.73355	9.90957	9.76425	9.02465	9.59131	9.14358	7.15874	9.52853	9.63723	9.10993	9.96098	10.0293	10.1667	10.204	9.98432	9.72119	10.0701	10.2364	10.5636	9.90551	8.2157	8.65703
AMPH	0.823388	1.0934e-05	7.07895e-05	7.90001	7.07662	7.86591	7.82348	8.49607	8.26068	7.87176	7.72523	7.95331	7.87725	7.9707	7.79066	7.92498	8.13667	7.97577	7.73469	8.21762	7.80944	8.30011	8.41039	8.29623	7.8265	8.47333	8.39925	8.48106	7.9568	8.0491	7.7434	7.7489	7.66789	6.70477	8.14817	8.26549	8.2423	8.1463	8.47381	8.32093	8.713	8.25981	8.36077	8.00635	8.5304	8.62584	8.73975	6.99562	7.23295
ANGPT2	0.602705	1.51413e-07	1.49712e-06	6.2018	5.59909	6.19596	5.98109	6.35961	6.306	6.1221	6.2009	6.65172	6.3498	6.11306	6.00497	5.8933	5.87498	5.88948	6.51573	7.17778	5.9116	6.12823	6.37595	6.18184	6.26207	6.401	6.06742	6.20854	6.01629	6.5319	6.17104	5.81763	6.00003	6.55932	6.1231	6.73737	6.21459	6.3084	6.79526	6.05826	6.33252	6.63831	5.83381	6.15158	6.10706	6.53525	6.30801	6.04077	5.95743
ANKH	1.06923	9.64328e-05	0.000482797	10.7655	9.69626	10.6327	11.0389	11.3915	10.6788	11.0966	10.9243	10.4697	11.1106	11.249	10.1588	11.1329	11.086	10.9071	10.417	11.0503	10.5771	11.3081	11.2636	10.7844	11.1329	11.4361	11.3274	11.2618	11.3544	11.1295	10.545	10.7542	10.2343	7.72053	10.9568	11.294	10.3025	11.1093	11.3999	11.372	11.4684	11.1583	11.2541	11.2636	11.3544	11.6072	11.4384	9.98143	10.3878
ANKRD20A11P	0.851221	0.0394168	0.0757353	10.3378	9.48658	9.85365	10.7415	11.0718	8.06463	10.9584	10.9188	10.1829	10.8465	11.0816	9.36104	10.8512	11.0348	10.9524	9.97644	10.9458	10.5434	11.2988	10.7495	10.5492	10.9801	11.5202	10.9498	11.47	11.258	11.1881	10.1363	10.5276	9.77513	6.95053	10.9679	10.9934	7.97991	11.1881	11.6072	11.4319	11.6244	10.8705	11.5334	11.4989	11.3238	11.4684	11.7002	9.0537	9.97644
ANKRD33	0.718255	0.0209758	0.0456248	7.07791	6.35966	7.18062	7.04562	8.32612	7.2354	7.46425	7.34227	6.78289	7.33147	7.45282	6.13205	7.04144	7.41426	7.34916	7.01899	7.5213	6.72542	7.97597	8.05171	7.17949	7.17268	8.21699	7.72564	7.74947	7.4388	7.29721	6.6313	6.76743	6.61902	6.4539	7.40317	7.14646	7.79994	7.1117	8.30263	8.161	8.3426	7.64805	7.73792	7.80823	7.34167	8.3463	7.88393	5.69029	5.59187
ANKRD34A	0.662351	0.0407034	0.0776854	8.21814	7.55579	7.80198	8.28911	8.96254	7.69227	8.89402	8.61327	8.58447	8.67712	8.61937	7.54611	8.59891	8.55625	8.26851	8.35878	8.35115	8.13767	8.74832	8.88779	7.73447	8.51845	9.63586	8.84461	8.82604	8.63069	8.71726	8.11981	8.35812	7.85889	6.83978	8.80005	8.72972	7.17441	8.78152	9.48687	8.93643	9.58045	8.40339	8.53588	8.85337	9.0762	9.2425	9.29643	6.87481	8.60957
ANKRD44-IT1	0.756556	0.00514371	0.0144598	5.0397	4.28314	4.9442	4.71503	5.16482	5.42229	4.64109	4.72118	4.73338	5.2953	5.42402	5.06695	5.40692	5.28392	4.9154	5.44787	5.39418	4.85296	4.83278	5.57801	5.29204	4.67171	5.23218	4.88363	4.5055	4.84426	4.9608	4.89854	5.07668	4.61768	6.09698	5.32742	4.71207	5.14673	6.5152	6.69421	6.37966	5.89883	6.12145	6.37776	5.23218	6.08671	5.88624	6.61495	4.11602	4.40647
ANKRD53	0.954413	0.00458548	0.013121	10.2215	9.26711	9.94491	10.4993	10.7577	9.40139	10.6106	10.6308	10.17	10.5333	10.5695	9.61916	10.6081	10.4741	10.6886	10.2075	10.594	10.2865	10.8196	10.6141	10.2559	10.9215	11.1106	10.7505	11.1295	11.0906	10.7793	10.1547	10.3042	9.6635	7.13988	10.9821	10.8996	8.83748	10.6456	11.0614	10.9282	11.2081	10.5035	11.0954	10.8621	10.9158	11.3477	11.1818	9.36694	9.98143
ANKRD65	0.837057	2.18812e-06	1.67048e-05	7.47312	6.63607	7.49987	7.24003	7.59619	7.7077	7.10036	7.32876	7.42354	7.34845	7.00957	7.78187	7.48153	7.59534	7.62478	7.38414	7.04269	7.37639	6.89879	6.79235	8.00728	7.26361	6.87217	7.56333	7.57976	7.42591	7.26597	7.72119	7.39781	7.59699	9.53569	7.45398	7.46615	7.28901	7.48501	7.02604	7.12618	6.76801	7.25499	7.29294	7.4154	7.85391	6.75811	6.97459	7.85932	7.7469
ANKS6	0.913427	1.21915e-06	9.93385e-06	8.18818	7.27476	7.79161	8.20476	8.43707	6.90016	8.56622	8.56425	8.27787	8.27184	8.21265	7.82626	8.25865	8.24401	8.69692	8.6803	8.1653	8.15956	8.13201	8.11537	8.24274	8.60332	8.37364	8.80805	8.46811	8.60352	8.27114	8.70628	8.76388	8.55529	7.79292	9.15292	9.25838	6.92905	8.15187	8.75634	8.29646	8.80005	8.21935	8.24567	8.19875	8.0275	8.1434	8.17633	7.62543	8.36301
ANLN	0.778307	4.04481e-06	2.8878e-05	9.07132	8.29302	8.84665	9.11753	9.18862	8.03123	9.68091	9.0922	8.63721	9.58775	8.98737	9.52253	9.05891	8.92343	8.59017	9.58719	9.06851	8.6612	9.42867	9.25675	8.50346	9.57463	8.49092	8.7693	9.20066	8.66547	9.24213	9.7399	8.85564	8.39136	7.80277	9.21056	8.82807	8.15844	9.16136	9.17053	9.35784	9.22304	9.43384	9.1147	9.61005	9.57996	9.52648	9.38999	8.96349	8.97754
ANO8	1.34667	0.0107789	0.0266273	10.1397	8.79307	9.81534	10.8077	11.5085	8.38168	11.0285	10.9282	10.0701	10.9173	11.3832	9.01877	10.9311	10.9215	10.514	9.93805	10.8838	10.0462	11.5986	11.0299	10.1047	11.1295	11.7762	10.8147	11.4724	11.3011	11.0906	10.007	10.1262	9.12866	8.6675	10.9766	10.8289	8.44053	10.9924	11.7652	11.3518	11.3193	10.836	11.557	11.2724	11.3894	11.8819	11.8996	7.85348	9.10846
ANXA10	0.614132	0.00473764	0.0134935	7.60116	6.98702	7.87176	7.7385	8.31624	7.20607	7.37161	7.9159	6.97039	7.62092	7.96272	7.0194	7.01146	7.19907	8.72227	7.4585	7.27594	7.69785	7.79925	7.91811	7.45358	7.72257	8.29385	7.52321	8.7446	8.94313	7.92679	7.40262	7.48114	7.25076	7.09783	7.99833	8.09263	7.37122	7.52942	8.25885	8.28096	8.46783	7.73431	8.38108	7.9177	8.14817	8.70601	8.44964	6.94719	6.79214
ANXA6	1.04218	0.00254133	0.00800353	9.90632	8.86415	9.86981	10.1301	10.63	9.24021	10.2717	9.85972	9.99871	10.2501	10.5502	9.44353	10.2444	10.3051	10.377	9.70159	10.2091	9.79617	10.5801	10.5486	9.97149	10.413	10.724	10.2203	10.6365	10.6907	10.429	9.73072	9.87972	9.37584	6.469	10.5394	10.3653	9.0537	10.5749	11.0045	10.7078	11.2451	10.3754	10.8027	10.8253	10.844	10.9836	10.8134	8.97817	9.48645
AOC1	0.879359	9.91643e-05	0.000494273	6.4471	5.56774	5.94741	5.89833	6.80526	6.06631	8.14897	6.10341	5.74452	6.72685	6.30172	5.87572	7.13273	5.8933	6.09061	5.88634	6.86788	6.00003	6.97389	7.62259	6.43564	6.01813	7.00671	5.72814	6.25436	6.7569	5.95461	5.85794	6.21316	6.05394	6.36691	5.87086	6.16652	6.96207	6.14262	6.2009	6.21924	6.82231	6.5015	6.25397	6.0639	6.07498	6.95683	6.60168	5.78586	7.40057
AOC4P	1.22648	7.53624e-22	1.27725e-19	6.36262	5.13614	6.20416	6.0186	6.10107	6.15197	6.38311	5.8582	6.19932	6.39128	6.20667	5.96087	6.2564	6.3604	6.25397	6.26544	6.25277	6.34383	6.08381	6.35961	6.30801	6.21655	6.55098	6.35504	6.33879	6.23007	6.10123	6.2368	6.47681	6.20179	6.14683	6.43209	6.60799	6.41513	6.24498	6.78975	6.21567	6.77648	6.15158	5.91977	6.39204	6.52269	6.60019	6.27262	6.96886	6.46026
AOX2P	1.0261	6.08355e-13	1.73772e-11	6.21179	5.18569	6.05417	6.373	6.02263	6.43688	6.29653	6.06046	6.33919	6.30213	6.3041	6.25908	6.3467	6.24343	5.72975	6.47816	5.85371	6.36907	6.36397	6.46319	6.33801	6.87481	6.32435	6.83575	5.89833	6.29867	6.47505	6.31254	6.7157	6.90502	7.10386	6.45944	6.23751	6.13695	6.8247	6.37714	6.08888	5.7818	5.96157	6.0731	5.65117	5.65786	6.1333	6.04446	6.0079	5.65969
AP000525.9	1.41181	6.61609e-08	6.9952e-07	9.24109	7.82928	8.17481	8.15207	9.18199	9.2795	9.56748	9.45021	8.10929	9.10499	9.39846	10.0548	9.83361	9.32681	8.08663	9.26924	9.4891	10.1907	9.24173	9.42832	9.98309	9.44313	8.74192	9.50237	9.09615	9.4095	9.56969	8.91552	9.14759	9.11692	7.95783	10.0815	9.47317	9.06298	9.48336	9.31139	9.99969	9.04698	9.47011	9.5182	9.66078	9.90379	9.57542	9.75066	8.15844	8.49437
AP001347.6	0.846723	0.00379768	0.0112277	7.01659	6.16987	7.19511	7.09766	8.21378	6.8067	7.86348	7.45336	6.57554	7.42591	7.67213	6.89531	6.99452	7.4158	6.88974	6.97872	7.01474	6.8775	8.32591	7.99505	7.01437	7.44343	7.88619	7.70527	7.56255	7.77058	6.87275	6.6476	7.35979	6.72664	6.33801	7.08417	7.32284	6.49127	7.53695	7.69089	7.19949	7.85284	7.16476	7.8114	7.0086	7.32917	8.16282	8.00208	5.51157	5.64145
AP001605.4	0.982637	0.00112662	0.00401511	8.06201	7.07937	8.50625	8.12907	8.55819	8.48255	8.34155	8.42397	7.82924	8.17869	8.59862	7.94417	8.21975	8.32473	7.84901	7.7469	8.35836	7.88743	8.85592	9.06475	8.21975	8.13603	8.76799	8.73215	8.43591	8.57052	8.25487	7.66692	8.11411	7.78718	7.58922	8.11259	8.11368	8.46714	9.01998	9.28586	8.64613	9.13251	8.61155	8.86223	8.69009	8.87768	9.26107	9.00369	6.7596	6.60855
AP1M2	0.692165	4.30178e-06	3.05382e-05	8.89126	8.19909	8.14817	8.58783	8.91966	10.3317	9.08183	8.54156	9.16634	9.01786	8.69056	9.03316	9.31925	8.9589	8.64955	9.24283	8.56514	9.05948	8.7618	8.48761	8.67209	9.40178	8.95461	8.71515	9.06817	8.27927	9.09525	8.30011	8.59385	8.36855	8.1358	8.99365	8.50059	8.40793	9.11717	9.24595	9.07165	8.75661	9.29792	8.79935	9.02034	8.87293	8.52052	8.70601	9.51631	9.08471
AP3B1	0.781631	0.00571104	0.0157679	9.57053	8.7889	9.32231	9.78169	10.2386	8.66036	9.66521	10.0354	9.27783	9.71148	10.2119	9.08932	9.78067	9.63527	10.1588	9.64888	9.62716	9.55429	10.0324	10.0141	9.6631	9.95932	10.4274	10.5079	9.96362	9.98257	10.2573	9.56369	9.88313	9.37732	7.20265	9.96496	10.2701	9.00369	10.0815	10.6559	10.4309	10.8276	9.79232	10.0779	10.2099	10.083	10.327	10.6118	8.97028	8.83576
AP3B2	0.76318	0.00496444	0.0140246	11.8271	11.0639	11.8142	12.0294	12.1922	11.6636	12.2265	11.9539	11.6498	12.1922	12.3656	11.2199	12.0929	12.2081	11.853	11.4751	12.1338	11.6805	12.2762	12.3169	11.8756	12.0775	12.5534	12.1594	12.22	12.2312	12.0294	11.4635	11.7652	11.1035	10.6266	11.9993	12.1488	11.2395	12.2432	12.4143	12.392	12.5259	12.4606	12.4488	12.6445	12.7105	12.6536	12.5867	10.868	11.6667
APBA2	0.596947	0.00285784	0.00882578	8.34181	7.74487	8.10281	8.39278	8.71408	7.79607	8.1767	8.63092	8.18632	8.16361	8.70335	7.80522	8.49345	8.59183	8.48828	8.24526	8.62584	8.19336	8.65306	8.57925	8.40579	8.69195	8.88658	8.80915	8.811	8.56425	8.92406	8.24076	8.45539	8.0019	7.4492	8.63092	8.78239	8.14897	8.52263	8.82264	8.62238	9.21086	8.67141	8.77296	8.80863	8.85946	8.966	9.16006	7.388	8.12161
APCDD1L-AS1	1.15012	0.00188812	0.00624279	9.33934	8.18922	9.05675	9.60953	9.8367	7.53128	9.53055	9.85365	9.37183	9.5701	9.87341	8.73215	9.61638	9.49992	10.083	9.48732	9.52435	9.544	9.82016	9.62095	9.51689	9.77827	10.0028	9.78123	10.0204	10.0874	10.0033	9.49631	9.7326	9.07784	5.9738	10.0421	10.324	7.62603	10.1068	10.3852	10.1679	10.8973	9.9318	10.2888	10.3362	10.3255	10.1471	10.0543	8.17034	9.34771
APELA	1.02385	0.000204608	0.000927383	6.60005	5.5762	6.89746	6.54498	6.73114	7.75519	6.98971	6.60999	6.74318	6.44596	6.67105	6.97925	6.58059	6.60582	6.25763	6.04446	9.06673	6.46458	6.95721	7.31082	7.85634	6.31897	6.53525	6.89998	6.14156	6.71263	6.39167	6.19312	6.30957	6.69446	5.25187	6.4331	6.10867	6.52497	7.44066	6.36844	6.65578	7.00752	6.48396	6.95091	6.4636	6.38444	7.46405	6.74958	7.80619	6.70477
APLNR	0.962795	2.24839e-05	0.00013527	6.5915	5.6287	6.11373	5.99178	6.71062	5.82114	6.82636	6.81175	6.47345	5.93303	6.03933	6.1501	6.09298	6.22638	5.84791	6.12103	8.16882	6.27328	5.83436	6.1478	6.23736	6.22292	6.57419	7.16534	6.49462	6.065	6.50565	6.11923	6.39971	5.77177	6.88926	6.11985	6.23832	6.33142	6.27526	7.72741	6.04515	7.04247	7.13365	7.28235	5.8876	6.79625	6.66296	6.67395	6.16901	6.30331
APLP1	0.834694	0.000208294	0.000942782	7.44896	6.61426	7.2552	7.70629	7.16063	7.26742	8.2438	7.38163	7.43165	7.73967	7.27983	7.66863	8.51781	7.17152	7.3129	7.31472	7.4011	7.46324	7.26945	7.47892	7.30607	7.21943	6.88071	7.39242	7.38594	7.28862	7.43624	7.72799	7.88824	7.8045	4.22163	7.41486	7.35315	7.54776	7.14146	6.74841	6.99035	7.13385	7.14703	7.40592	7.21825	7.12843	7.21237	6.85034	7.47449	8.99365
APOA1	1.31793	8.05202e-06	5.35242e-05	9.60433	8.28641	8.85083	9.63627	9.84558	9.30444	11.0299	9.30632	8.68583	11.7988	9.96843	8.37655	10.1186	9.00559	8.85619	9.35361	9.40744	9.12697	9.26107	10.1687	9.43899	10.4626	9.29173	9.31446	9.8521	11.2602	10.48	8.98336	10.6408	9.39601	8.74703	9.59897	9.30882	8.3775	9.90379	9.33742	9.86271	10.0141	8.92374	9.14104	10.5818	9.3404	9.25414	9.24071	9.05856	9.44899
APOA1BP	0.75714	6.04844e-06	4.13223e-05	10.5856	9.82848	10.8067	11.0113	10.5149	11.3501	10.3371	10.4393	10.6279	10.8512	10.48	10.4408	10.8231	10.8538	10.4862	10.5646	10.5386	10.8644	9.95863	10.4162	10.8985	10.5222	10.0371	10.5932	10.0507	10.1174	9.76261	11.1035	11.2694	11.1983	10.1762	10.8826	10.5809	10.7449	10.2796	10.2004	9.99919	9.74487	10.7542	9.87126	9.92664	10.0938	9.44436	9.85415	11.2525	10.8873
APOBEC4	0.790569	0.00135775	0.00470971	7.10884	6.31827	7.54195	7.0543	7.52721	7.31874	7.31995	7.01304	6.69555	7.13688	7.24331	7.12024	7.00843	7.53497	7.1814	6.80903	7.4986	7.13988	6.93701	7.92498	7.01492	6.85093	7.2402	7.54052	7.53769	7.13402	7.13844	6.69464	7.11849	6.64899	7.36669	7.20589	6.92804	7.7866	7.47932	7.96652	8.02569	8.13153	8.01421	7.96891	7.30717	7.63344	8.68535	8.23556	6.09767	6.12293
APPL1	1.70139	1.82373e-10	3.30278e-09	10.6213	8.91994	10.3113	10.9106	11.2097	9.9135	11.0113	10.9986	10.3804	10.8538	11.1671	10.0204	11.0113	11.0402	10.8208	10.1111	10.8566	10.4006	11.4801	11.0187	10.4034	11.0982	11.5986	10.9793	11.3791	11.2268	11.0566	10.088	10.1553	9.9519	9.7837	10.9615	10.9868	9.48645	11.0448	11.5652	11.3274	11.3983	10.8927	11.4724	11.3915	11.3915	11.47	11.7558	9.78972	10.2217
AQP5	0.851276	0.00248272	0.00784813	8.85791	8.00664	8.06723	9.13382	9.2814	7.30481	9.35962	9.25216	8.62262	8.75609	9.30078	8.01709	8.73263	8.82718	9.11124	8.57143	8.71597	8.6691	9.20162	8.88658	9.22165	9.15095	9.77711	9.7399	9.42005	9.35627	9.32462	9.1988	9.11124	8.8448	8.81789	9.6558	9.87707	7.38432	9.12697	9.64215	9.39846	9.84021	9.02647	9.44239	9.38253	9.15629	9.42258	9.81638	7.44673	8.38556
AQP7	1.28071	1.29437e-14	5.17749e-13	8.41237	7.13166	8.31232	8.29271	8.71274	8.6469	8.47993	8.57025	8.77536	8.06637	8.44255	8.38793	8.60485	8.75808	8.4161	9.04633	8.51592	8.3205	8.66332	8.90907	8.57259	8.63048	8.92094	8.86341	8.54304	8.52677	8.53773	8.7395	8.38618	8.39046	8.82241	8.95857	8.82544	8.40135	8.71515	8.89557	8.5579	8.44073	8.06944	8.62212	8.22746	8.39629	8.40815	8.9426	7.76014	7.57618
ARF1P1	0.636781	2.79976e-05	0.00016459	7.46859	6.8318	7.57407	7.44305	7.45336	7.49113	7.54014	7.56555	7.30975	7.16662	7.64167	7.40899	7.24408	7.52721	7.30535	7.24888	7.79925	7.11849	7.57326	7.84173	7.43106	7.51758	7.53325	7.51192	7.49769	7.35394	7.40166	7.50751	7.33184	7.06009	8.95977	7.34899	7.15475	8.0335	7.36547	7.63234	8.11012	8.41468	7.80599	7.94619	7.13952	8.00404	8.45212	7.90396	7.01624	6.80526
ARFIP1	1.08927	7.48603e-10	1.19777e-08	9.81033	8.72106	10.17	10.0191	9.69063	9.80873	9.34899	10.3539	10.1895	9.7951	9.60648	10.5893	9.47294	10.1349	10.0735	10.5477	9.97267	9.99129	9.61441	9.46035	10.2701	9.71868	9.1063	10.3722	9.35215	9.35291	9.49541	10.1542	10.1928	9.99871	8.652	9.45136	9.15704	10.5149	9.67117	9.21185	9.58909	9.55021	10.1708	9.73728	9.19076	9.47772	9.10535	9.09642	9.98993	9.56088
ARFIP2	0.883125	0.0103659	0.0257908	10.4675	9.58438	10.0799	10.6671	11.1689	9.78169	10.7682	10.8088	10.3908	10.5969	11.2432	9.57678	11.0389	11.1273	10.9122	10.5582	11.0671	10.5695	11.4841	10.9243	10.6895	10.9766	11.5702	11.3031	11.4964	11.1881	11.0285	10.3539	10.5978	9.8332	8.83666	11.2822	11.0982	9.03871	10.9458	11.478	11.0803	11.2199	10.629	11.3894	10.9821	11.003	11.3395	11.6072	9.50798	9.89637
ARHGAP11A	1.2188	4.6165e-07	4.11635e-06	5.8686	4.6498	5.50946	6.04748	4.98839	4.9984	6.26035	6.32003	5.64661	5.71746	5.7088	6.72887	5.57497	5.33466	5.04156	5.23962	5.07921	5.88624	5.84546	6.1682	5.47169	5.92349	5.46803	5.02912	6.1333	5.73778	6.17976	6.79526	6.24877	5.58146	5.99094	5.75931	6.14516	5.03631	5.61417	4.89723	5.44083	5.62429	4.86701	5.72975	5.97095	5.20563	5.9654	4.99715	6.65827	6.76542
ARHGAP11B	2.19471	7.16873e-15	2.99308e-13	7.44361	5.2489	7.48216	7.82473	6.86417	7.11464	8.16282	7.15141	7.10108	6.91467	7.94552	7.95237	8.1428	7.5234	6.99623	6.95945	6.41735	7.31366	7.06707	6.73505	7.49839	8.36236	7.03393	6.76623	8.45585	6.79037	7.52884	7.93215	7.62639	6.64976	7.15371	7.47544	6.84867	8.23876	6.51985	5.44897	6.85267	6.08819	8.08148	7.32074	8.79795	8.18046	7.25787	7.61422	7.60214	8.45965
ARHGAP8	0.786725	3.57421e-06	2.58545e-05	8.58425	7.79753	8.4287	8.51799	8.80996	8.08996	8.82657	8.74291	8.36657	8.67806	8.49321	8.20616	8.13432	8.65118	8.55869	8.68561	8.73159	8.52119	8.53749	9.00141	8.26226	8.7958	8.5041	8.33485	8.63116	8.7907	8.96349	8.30884	8.32811	8.19359	9.56369	8.63001	8.62021	8.27971	8.96218	8.77625	9.03594	9.52853	8.77108	8.63116	9.51054	9.63814	8.62476	8.49523	8.38556	8.81602
ARHGDIA	0.594678	0.000421368	0.00172652	9.38229	8.78761	9.71537	9.54556	9.81184	9.77621	9.81184	9.43639	9.31925	9.72592	9.74236	9.3371	9.46768	9.58585	9.46245	9.17644	9.56369	9.18961	9.46613	10.2914	9.30555	9.58676	9.70106	9.42258	9.43171	9.74778	9.42911	9.07853	9.39206	8.99428	7.17701	9.31693	9.32755	9.12213	9.50839	9.67717	9.80437	9.89091	9.80091	9.63051	9.77659	9.87126	9.92664	9.48687	9.00461	9.29825
ARHGEF12	1.64359	1.00579e-19	1.06539e-17	9.05685	7.41327	8.804	9.15907	9.34666	8.25865	9.31254	9.27521	8.92914	8.92406	9.35152	8.66036	9.10877	9.22196	9.18018	8.88071	9.17481	8.90405	9.19369	9.34545	8.99241	9.23375	9.61496	9.45095	9.31489	9.50455	9.3635	9.00109	9.05049	8.7186	8.1632	9.42154	9.39757	8.05195	9.21221	9.59897	9.40361	9.61688	9.04114	9.30078	9.24283	9.35926	9.40744	9.60909	8.80996	8.7274
ARHGEF15	2.69408	2.31852e-11	4.96701e-10	9.57354	6.87946	9.28776	9.95751	10.6118	8.51213	9.90797	10.083	8.92433	9.99636	10.3206	8.49926	10.1403	10.0804	10.2951	9.54606	10.0309	9.63586	10.6849	10.2487	9.4562	10.1268	10.8694	10.1542	10.6499	10.4566	10.0342	9.53183	9.77149	9.08082	7.36111	10.0185	10.2419	8.19987	10.1921	10.9737	10.5047	11.0141	10.2126	10.1163	10.711	10.7752	11.0492	10.5592	8.07007	8.87212
ARHGEF16	0.752199	0.00664365	0.0178937	9.22421	8.47201	8.79981	9.29643	9.75218	8.36214	9.74033	9.46175	9.07784	9.55139	9.30519	8.35159	9.36461	9.32422	9.79617	9.64459	9.38738	9.2086	9.5407	9.72639	9.08771	9.68599	9.62672	10.0354	9.84179	9.91686	9.62365	8.99148	9.66206	8.87072	7.73368	9.81534	9.9135	8.21243	9.73355	10.0141	9.83361	10.0651	9.7676	9.81092	9.82464	9.95863	10.036	9.87498	8.25912	9.14104
ARHGEF19	0.956242	3.66096e-06	2.63986e-05	7.91103	6.95479	7.51097	7.91324	7.9582	7.21875	7.98977	7.94682	8.12712	7.96294	6.76887	8.29521	7.72667	7.15032	7.65807	8.36745	8.07344	8.38531	7.52239	7.45564	8.03307	7.97377	7.58842	7.66005	7.63049	7.9446	7.58956	8.44643	9.16264	8.26762	7.40371	7.88349	7.22725	6.94533	8.1634	7.06685	7.82861	7.15475	8.01483	7.43645	7.45678	7.73792	7.13041	7.43449	8.43631	8.97444
ARHGEF2	1.59398	7.67031e-11	1.49486e-09	10.2788	8.68483	10.0715	10.5259	10.8289	10.007	10.6991	10.5528	10.2435	10.5636	10.8838	9.96413	10.4575	10.7351	10.5882	10.206	10.655	10.0904	10.8812	10.9485	10.2336	10.6983	11.0431	11.003	10.9034	10.8452	10.7055	10.0743	10.3722	9.9753	8.0382	10.6211	10.9057	9.67878	10.4784	10.8644	10.8938	10.4582	10.3747	10.6682	10.4671	10.4493	10.8838	10.8812	9.51781	9.73355
ARHGEF39	0.90677	0.00116202	0.00412011	7.76845	6.86168	7.9967	7.9623	8.48551	7.50282	8.07476	8.21314	7.62603	8.18137	8.318	7.27576	8.11961	8.26762	7.82288	7.57226	8.19831	7.63827	8.27927	8.53064	8.03102	8.19144	8.27368	8.19318	8.37463	8.1674	8.20891	7.6517	7.99083	7.43944	7.13781	7.88002	7.86284	7.74042	7.9975	8.29646	8.10418	8.5523	8.04324	8.13033	8.26784	8.2498	8.67039	8.49416	6.76307	6.89484
ARID1B	0.598702	0.00210246	0.00682619	10.1059	9.50717	9.76018	10.1094	10.1248	9.36768	10.223	10.0768	9.95505	10.0554	10.2251	9.95991	10.0749	10.2303	10.4325	10.0028	10.0554	10.0146	9.9946	10.3353	9.8808	10.3708	10.3317	10.4457	10.3786	10.488	10.3636	9.99747	10.0804	9.73632	8.69639	10.4643	10.7078	9.12482	10.5315	10.6849	10.7219	11.2113	10.5157	10.6601	10.8644	10.889	10.5901	10.7383	9.64568	10.1484
ARID3B	0.655701	0.0198488	0.0436212	8.34546	7.68976	8.08801	8.39629	9.12833	7.59699	9.05923	8.55465	7.93074	8.7907	9.37009	7.66147	8.41803	8.64276	8.57408	7.93904	8.67334	8.06944	9.24213	9.16264	8.20258	8.8284	9.06268	9.32798	9.07942	8.92944	8.64613	7.63978	8.51239	7.86143	6.3449	8.83125	8.94592	7.62543	8.86727	9.26184	9.11287	8.78095	8.47044	9.47489	9.1813	8.10361	9.38253	9.17554	7.3395	7.53406
ARL4C	0.823699	0.00469651	0.0133868	9.51417	8.69048	10.3715	8.38458	9.27708	10.7724	8.70068	10.6767	9.21056	9.47257	10.359	10.2598	9.83014	11.0212	10.0367	11.0518	9.17878	10.7682	9.724	9.35507	9.47569	9.41642	8.15742	10.1163	9.01159	8.42626	8.05594	9.79882	8.95031	9.55857	10.2881	10.2435	8.15363	10.0467	9.45054	7.64391	8.31352	8.01709	8.05693	8.8067	9.57794	8.89929	9.47859	9.48088	8.24567	9.52777
ARMC12	0.839145	3.91521e-05	0.00021929	6.82675	5.98761	6.41655	6.80953	7.56274	5.99151	6.56498	6.96989	6.59125	6.25358	6.951	6.44237	6.74358	7.34393	7.26078	6.95109	6.65924	6.66084	7.39882	6.70345	6.7751	6.74023	7.5557	7.97354	7.64539	6.92941	7.16119	7.18264	7.2005	6.528	5.06444	7.61134	7.47008	6.31149	6.97837	7.53992	7.24061	8.57577	6.76045	7.02375	7.12748	7.39529	6.81453	7.10827	6.26654	6.17539
ARMC2-AS1	0.65737	0.000263423	0.00115639	11.5536	10.8962	11.7952	11.8929	11.256	11.5674	11.578	11.3138	12.237	12.1387	11.6916	12.2716	11.4912	11.5154	11.6555	11.7525	11.9281	11.7027	11.0045	11.4889	11.1799	11.5235	10.651	11.3635	10.9445	11.5428	11.4989	12.2538	11.1035	11.3294	11.9384	11.4299	11.2199	12.2831	11.3031	10.8314	11.174	10.7018	11.678	10.9654	10.9408	11.3518	10.1956	10.3976	12.0346	11.9043
ARMC3	3.11833	6.31385e-18	4.77565e-16	8.15733	5.03901	8.36879	8.55529	8.96349	8.35878	8.16785	8.15545	7.66106	8.22263	8.82298	7.30898	8.53727	8.65004	8.73902	8.38393	8.89671	7.85229	9.04996	8.43797	7.89194	8.84342	8.89613	8.47358	9.02561	8.90465	8.56695	7.4747	8.23274	7.37315	5.3714	8.34472	8.45793	7.59978	8.23005	9.16562	8.62262	9.23849	8.06232	8.7211	8.84142	8.44665	8.97498	8.98563	7.17849	6.55557
ARPC5L	0.764664	6.48308e-09	8.53469e-08	9.76361	8.99895	10.0664	10.0863	9.79666	9.16063	9.9946	9.88755	9.80091	10.1342	9.82667	10.1458	9.72825	9.63359	9.84558	10.0932	9.72639	9.42537	9.7735	9.72967	9.61874	10.0174	9.86661	9.93417	9.74189	9.62672	9.92408	9.95338	9.67426	9.86768	10.1673	9.94137	9.98779	9.40139	9.48645	9.9495	9.67717	10.3644	10.1137	9.65531	10.196	10.164	9.99747	9.89815	9.10785	9.57718
ARSG	0.820068	0.00322598	0.00977851	8.48074	7.66067	8.46407	8.68886	9.13482	7.9729	8.73634	8.76667	8.32662	8.86513	9.04013	7.87277	8.73975	8.7431	8.57367	8.33887	8.67189	8.22726	9.13823	9.28459	8.48039	8.85564	9.21937	9.15205	9.04806	9.035	8.84342	8.78121	8.61356	8.18521	7.08931	8.92674	9.0283	8.00868	9.01463	9.34621	9.04633	9.27708	8.80783	8.97146	8.89671	9.37838	9.27596	9.0347	7.20746	7.75476
ARTN	0.58835	0.00228485	0.00732894	7.92079	7.33244	7.98506	8.01463	8.47592	7.29947	8.182	8.18028	7.4747	8.15053	8.27681	7.34959	8.19614	8.06109	7.85932	7.75348	8.06702	7.66711	8.43338	8.57099	7.81241	8.03373	8.52119	8.0687	8.23648	8.24544	8.1923	7.74808	7.76466	7.60408	7.47134	8.16938	8.33606	7.84549	8.18652	8.6936	8.33606	8.58403	8.03248	8.09693	8.5325	8.30358	8.45965	8.71826	7.24666	7.63088
ARVCF	0.714249	0.00239436	0.00761191	9.21019	8.49594	9.13452	9.23985	9.40305	8.63447	9.0828	9.32492	9.11927	9.29825	9.46684	8.80915	9.2223	9.34771	9.66868	9.27636	9.29024	9.11509	9.44474	9.55021	9.10499	9.31325	9.51153	9.57833	9.47385	9.51403	9.45298	8.75118	9.08864	8.60696	7.66482	9.28168	9.45874	8.65816	9.86432	9.96413	10.0708	10.7253	9.90226	9.74391	10.085	10.3419	9.94137	9.92947	8.39906	9.39475
ASB12	0.919548	0.00102495	0.00370062	8.42969	7.51014	9.12665	8.63212	8.98308	9.25497	8.60381	8.46643	8.30545	9.11189	9.07516	7.88619	8.93252	8.63954	8.54156	8.13365	8.81853	8.63675	8.60011	9.34256	8.63092	8.27499	8.94778	9.1849	8.32178	8.48686	8.59155	8.22544	8.51438	8.26656	6.13669	8.30957	8.52145	9.29924	9.01042	8.87807	9.14324	9.36768	8.91353	8.57344	9.02311	9.35627	9.53263	8.96788	7.42198	8.22057
ASB13	2.833	3.29262e-16	1.79797e-14	11.8159	8.9829	11.4819	11.9747	12.0445	11.0099	12.1023	11.8419	11.5483	12.0682	11.9577	11.0154	12.0294	11.8647	11.9204	11.4468	11.9247	11.8176	12.1594	11.9462	11.7888	12.3312	12.5377	12.2831	12.3448	12.3517	12.1648	11.5826	11.8419	11.1136	9.04368	12.237	12.3248	10.7309	12.5454	12.7962	12.5646	12.86	12.5758	12.9946	12.9244	12.9374	12.7512	12.807	11.0431	11.9703
ASB6	0.622178	0.00688243	0.0184111	8.5307	7.90852	8.17571	8.66618	8.88575	7.70036	8.73688	8.67039	8.22283	8.70205	9.02369	8.10477	8.42583	8.49297	8.92914	8.26423	8.54858	8.43728	9.08799	8.78954	8.20826	8.86081	9.37261	9.43088	8.8713	8.94625	8.99975	8.44028	8.45372	8.11591	8.38754	8.82411	8.93643	7.96583	8.75317	9.50839	9.1147	9.40789	8.60352	8.92051	9.14977	8.88416	9.13905	9.91803	7.64805	7.82759
ASF1B	0.60408	3.71316e-05	0.000209564	7.89353	7.28945	6.87836	7.84038	8.20207	7.05641	7.60978	7.64993	7.67396	7.82626	8.18783	7.44189	7.61386	7.36979	7.80254	7.75199	7.43747	7.63902	7.79624	7.65207	7.58754	7.96848	8.09039	8.15229	8.58189	7.99146	8.44621	7.921	8.31068	7.8649	7.19669	8.23674	8.31488	7.30696	7.96094	8.51162	8.2118	8.2232	7.57642	7.74578	8.07856	7.44818	8.51138	8.11156	7.89235	8.3529
ASGR2	0.847526	0.00153381	0.00521526	8.57657	7.72904	8.86481	8.81186	9.03403	8.7339	8.95229	8.98409	8.46692	9.10384	9.32037	8.3683	8.82544	8.65463	8.63171	8.38168	8.98102	8.30381	9.15205	9.56709	8.37463	8.67712	9.44278	8.95656	8.97698	8.91884	9.01667	8.30567	8.45985	7.97092	7.34864	8.69455	8.966	8.71123	9.11381	9.64086	9.36271	9.18453	8.78039	9.03808	9.17518	8.9976	9.68091	9.53349	7.28038	7.62241
ASH1L-AS1	1.13794	0.00544775	0.0151709	11.0652	9.92724	10.7149	11.4801	11.7652	10.0287	11.2861	11.5535	10.8776	11.3771	11.8616	10.3993	11.5179	11.578	11.4256	10.7461	11.5011	10.8717	12.0874	11.7087	11.1444	11.6916	12.0634	11.2861	11.8247	11.8211	11.6465	10.5003	11.0285	10.3008	9.46967	11.4319	11.1707	9.45874	11.9125	12.1978	12.0775	12.7308	11.8724	12.123	12.4488	12.3782	12.4768	12.5101	9.62802	10.514
ASIC2	0.8063	0.0411791	0.0783908	8.96306	8.15676	8.53951	9.51271	9.85154	7.58112	9.42414	9.72164	8.77698	9.1694	9.49958	8.09693	9.47454	9.6196	9.25497	8.99336	9.51236	8.88309	10.2968	9.68599	9.02935	9.82918	10.0223	9.78021	10.0491	9.82196	9.48196	8.85683	9.36618	8.34727	6.76285	9.64044	10.1417	7.43549	9.42295	9.94688	9.72119	10.206	9.2248	10.0486	9.5701	9.82196	10.216	10.5739	7.96744	7.79107
ASIP	0.945653	0.0189616	0.042051	7.47513	6.52947	6.38421	7.63353	8.80836	5.49059	8.29404	7.69442	6.71871	8.05392	7.74911	6.75018	7.69337	7.93255	8.14261	7.57365	7.48642	7.17869	8.71597	8.21677	6.91611	8.387	8.64871	8.49735	8.62975	8.8289	8.28057	7.77507	7.76194	7.65287	5.69289	8.25865	7.71811	5.99701	7.68405	8.77443	8.41773	9.23914	7.69442	8.40793	8.4995	7.92578	8.58747	8.49504	6.09955	6.50585
ASL	0.723485	7.34818e-05	0.000383325	8.19914	7.47565	7.68205	9.12125	8.58043	7.45054	8.56557	7.99895	8.23535	8.88723	7.80967	7.13725	7.7369	8.5523	8.17869	8.03886	7.70448	7.79484	8.63171	8.25355	8.12119	7.78326	7.98999	7.92226	7.6291	7.72276	7.71201	7.92916	7.54832	8.6636	8.44665	7.98857	7.56072	8.2538	8.67435	9.21755	8.01664	8.33606	8.17457	8.00073	7.79624	7.95887	7.60037	7.41757	8.00749	9.00525
ASMTL-AS1	0.6081	9.96797e-06	6.51062e-05	8.51374	7.90563	8.80077	8.65643	8.90091	8.76986	8.70232	8.34754	8.3443	8.90709	8.69112	8.05237	8.74334	8.37775	8.76431	8.44352	8.47242	8.45071	8.4136	8.65004	8.68729	8.5393	8.73333	8.75492	8.48039	8.78929	8.72764	8.46761	8.62238	8.49394	8.66147	8.36657	8.73846	8.49462	8.72555	8.73083	8.83715	8.89379	8.76236	8.79957	8.73184	8.74192	8.80836	8.95263	7.97684	8.61301
ASPM	0.77702	0.00113088	0.00402843	7.81083	7.03381	7.05718	8.00657	7.35979	7.06584	8.25536	7.68205	7.70164	7.8212	7.83025	7.99707	8.60848	7.09575	6.47717	8.21265	6.72423	8.46209	6.86847	7.19767	7.44107	8.39088	6.85608	7.34227	7.75628	6.77262	8.22614	8.28187	8.42048	7.47608	7.51118	7.83966	7.54369	7.04542	7.62588	7.04228	7.83522	7.26059	8.00404	7.39723	8.49297	7.67694	8.17718	8.06358	7.76835	8.08886
ASRGL1	1.66424	1.46395e-09	2.20074e-08	11.0381	9.37386	11.7652	10.7844	10.8669	11.3238	10.732	11.1918	11.4161	10.5403	10.3082	10.2022	10.9643	11.678	11.2113	10.5872	11.8616	10.5555	11.3158	10.7855	11.9539	11.3656	11.5062	11.6214	11.4341	10.7131	11.1785	11.0906	10.7659	10.1021	11.1616	11.2798	10.9034	11.4509	11.3274	11.1413	11.5235	11.3238	11.2414	11.1067	11.6886	11.5284	11.3564	11.0773	11.0729	10.8621
ASS1	1.36888	8.4498e-09	1.0898e-07	11.6827	10.3138	12.0682	12.0634	11.1136	12.0394	12.1127	11.846	12.5175	12.1286	11.7824	12.3713	10.9173	11.2451	11.594	11.9346	11.1511	11.0629	11.1413	11.9952	11.3656	12.0824	10.9629	11.6498	11.2678	11.1671	12.4065	11.4912	11.4276	12.3782	12.7861	12.4213	12.3996	11.0954	11.3791	10.7121	11.1551	10.9836	12.0147	11.1633	11.0113	11.4964	10.8183	10.8302	12.2944	12.4275
ATAT1	0.661636	0.00444492	0.0127892	8.88578	8.22415	8.96283	8.9569	9.43684	8.91941	9.12155	9.13118	8.97698	9.15804	9.4486	8.5807	8.80996	9.1023	9.1006	8.90939	8.97474	8.85057	9.40789	9.59042	9.16172	9.16765	9.42993	9.48088	9.22671	9.58775	9.27259	8.44091	9.12353	8.65143	8.06766	9.25414	9.12418	8.49659	9.13185	9.5863	9.22942	9.80536	9.18417	9.36846	9.39284	9.47569	9.69595	9.39994	7.62566	8.32542
ATF4	1.55996	5.59753e-17	3.45886e-15	12.2087	10.6488	12.2432	12.4065	12.6055	12.1286	12.7213	12.2716	12.2762	12.8991	12.86	11.6019	12.4864	12.6627	12.1127	11.9908	12.7213	12.0394	12.9501	12.6445	12.2484	12.4213	12.7008	12.4951	12.5377	12.5259	12.5867	11.9577	12.2028	11.8868	11.5512	12.4951	12.4213	12.0294	12.187	12.2538	12.1978	12.4143	12.4696	12.3169	12.3656	12.3996	12.5259	12.4488	11.4115	12.0445
ATG101	0.783944	0.000115932	0.000566417	9.00767	8.22372	9.52743	8.58512	9.03178	9.48596	9.5487	8.72858	8.2538	9.2248	9.00411	9.53437	9.46138	8.81442	9.0347	9.23514	8.86144	9.74236	9.17261	8.37887	9.88123	8.60877	8.60696	8.25805	8.56907	8.30794	9.14887	8.7907	9.78972	8.70712	8.94809	8.56836	8.43382	8.32567	8.92315	8.84687	8.60059	8.26024	8.24401	8.06702	8.93534	7.75496	8.2521	9.00913	9.68833	10.5846
ATG9A	1.05528	7.95673e-11	1.54673e-09	8.89954	7.84425	8.19336	8.6552	8.95407	8.42559	8.60259	8.92285	8.54958	8.76323	8.8571	8.51074	8.72139	8.86676	8.92532	9.39041	8.67591	8.94592	8.89847	8.86422	8.88575	9.21185	9.0576	9.30254	8.94982	8.88011	9.11509	9.03078	8.88272	8.79658	8.38078	9.63586	9.86481	8.21525	9.23514	9.54606	9.3865	9.42052	8.89205	9.16863	9.3393	9.47859	9.29643	9.3751	8.5693	8.88687
ATN1	0.605664	0.00246119	0.00779406	10.5523	9.94664	10.6049	10.7649	10.9434	10.537	10.9434	10.6983	10.2701	10.9071	10.9808	10.0804	10.7438	10.8705	10.7167	10.3548	10.7771	10.2982	10.8013	11.2128	10.5434	10.7981	10.9335	10.9654	10.8812	11.0492	10.8027	10.2378	10.5685	10.1034	8.86254	10.6418	11.0841	9.98887	10.7632	10.9599	11.027	11.2414	10.9254	10.9599	11.0099	11.024	11.1081	10.8764	9.98505	10.4509
ATP10B	0.986039	5.33707e-06	3.70261e-05	8.58246	7.59642	9.38169	8.64348	8.69112	9.27077	8.69431	8.63541	8.54468	8.82983	8.93033	8.87183	8.9484	8.811	8.63541	8.41339	8.90357	8.56049	8.48953	9.48942	8.40457	8.71382	8.92285	8.86513	8.57699	8.97498	8.6404	8.46014	8.67658	8.59086	7.8468	9.10846	9.16294	9.16562	8.7542	8.96638	8.94691	8.84055	9.02492	8.70814	8.5635	8.86813	9.14942	9.05646	8.65883	7.83966
ATP13A1	0.660856	2.31722e-07	2.19264e-06	9.00187	8.34101	8.40753	8.4709	8.66939	8.60112	8.83329	8.91408	8.59962	8.92726	9.04234	8.4969	9.13221	9.02228	9.11412	8.86314	8.58832	8.81328	8.81186	8.67334	8.92853	9.42414	8.80939	9.32109	9.10993	9.11895	9.14072	9.07784	9.18266	8.76667	9.29141	9.2526	10.2313	8.49214	9.01096	9.26077	9.86768	9.06979	8.75474	9.09195	9.21145	9.20505	8.72391	9.14759	8.97754	9.48036
ATP13A5	1.22377	0.00157517	0.0053402	8.58387	7.3601	8.37283	9.09484	9.70639	7.53901	8.95088	9.37434	8.7274	8.88801	9.16798	8.2519	8.85739	8.85657	9.34848	9.33674	8.97089	8.71015	8.34608	9.14759	8.74618	9.11824	9.27667	9.60823	9.63903	9.46568	9.24535	8.83525	9.13027	8.65794	7.13347	9.5819	9.39412	7.181	9.02618	9.52301	9.29102	9.96791	9.27259	9.256	9.16863	9.19972	9.1467	9.256	6.98296	7.79925
ATP4A	2.70919	1.014e-12	2.76854e-11	8.75566	6.04647	8.42583	9.22671	9.66164	6.6021	9.22526	9.29469	8.47765	9.37696	9.23125	7.74062	8.98336	8.88513	9.52703	8.81524	9.06726	8.7225	9.25455	9.21689	8.78659	9.65976	9.62853	8.61722	9.65301	9.56969	9.34073	8.82115	8.8896	8.38078	5.96087	9.35892	9.37355	6.61715	9.35215	9.30519	9.44755	10.3082	9.65342	9.87184	9.69289	9.69289	9.61916	9.76468	7.71943	8.56222
ATP5E	0.740325	1.66322e-10	3.03223e-09	11.1959	10.4556	11.2395	11.1847	11.1868	11.2214	11.3353	11.3274	11.1671	11.5334	11.4487	11.2165	11.4341	11.4115	11.3064	11.2147	11.2919	11.2249	11.3274	11.4361	11.1259	11.4384	11.0071	11.5179	11.1689	11.3175	11.2015	11.2694	11.5452	11.1707	11.6667	11.2343	11.3097	11.3983	11.1136	10.8973	11.1511	10.8705	11.2432	11.1616	10.9034	10.9883	11.0099	10.8264	10.9766	11.0982
ATP5G1	0.773372	0.000220188	0.000989568	11.1458	10.3724	11.3047	11.3999	11.7027	11.5452	11.5674	11.1818	10.5232	11.7444	11.4864	10.8985	11.5512	11.294	11.3375	10.7694	11.2973	11.0683	11.5731	11.8963	10.6778	11.3031	11.8495	11.5129	11.2822	11.557	11.1478	10.9146	10.8538	11.0757	10.4918	10.8208	11.4139	11.0086	11.6244	11.387	11.5105	11.3437	11.6555	11.2658	11.7263	11.8142	12.1286	11.256	10.4202	10.991
ATP5SL	1.13103	1.63535e-14	6.44005e-13	9.8625	8.73148	9.78472	9.82863	9.95561	9.73308	9.9249	9.78225	9.81238	9.95814	9.95561	9.62505	9.83802	10.0688	10.0722	9.73889	10.0158	9.95434	9.89867	10.0743	9.84825	9.88936	9.96042	10.3668	9.91092	9.99241	9.91686	9.69339	9.86598	9.87025	8.4969	10.2016	10.5325	9.27259	10.2271	10.1915	10.1523	10.629	9.92785	10.201	9.91037	10.1997	10.0593	10.1235	9.8242	10.0129
ATP6V0E2	1.12741	0.000310009	0.00132977	10.2704	9.14296	9.80779	10.5492	11.0416	9.00746	10.5837	10.6682	10.4162	10.7942	10.7694	9.39475	10.5165	10.6118	10.7577	9.93627	10.3175	10.1741	11.1169	10.5267	10.3564	10.7705	10.9986	10.6106	11.0141	11.2694	10.7898	10.3693	10.7131	9.39475	10.1255	10.5781	10.6724	8.53951	10.5509	10.9243	10.7967	11.2231	10.6806	11.0416	10.9158	11.1081	10.8938	10.9629	8.75578	9.94825
ATP6V1B1	1.46754	1.92034e-07	1.8539e-06	8.38745	6.91991	9.64317	7.39781	8.13286	8.22431	8.42355	9.1063	9.42832	8.96788	9.049	8.324	8.60233	9.10125	9.33378	7.77851	8.10193	8.65703	8.09263	7.73646	8.42098	8.2157	8.43171	7.41232	7.89699	8.32933	8.27499	8.98231	7.53592	8.07553	8.6826	9.20344	8.89641	7.99854	8.54384	7.33204	7.00196	7.44543	8.22853	7.77851	7.15555	8.33147	6.94458	7.73197	10.2951	8.48274
AUNIP	1.29934	0.000654692	0.00252624	9.30568	8.00634	8.9027	9.65976	10.206	8.38775	9.42453	9.90797	9.11255	9.45217	10.0234	8.56622	9.8827	9.7676	9.87296	9.40024	9.6816	9.54477	10.3331	9.85415	9.24595	9.78582	10.3737	10.2336	10.2667	9.80949	9.78709	9.43974	9.60953	8.98769	6.92429	9.73493	10.2175	8.08148	9.62716	10.491	9.9499	10.6279	9.62466	9.7937	9.99573	9.98143	10.3122	9.97935	7.96952	8.39136
AURKA	1.2482	1.72986e-10	3.14369e-09	9.03326	7.78506	8.70601	9.08799	9.16905	8.03525	9.22632	9.08832	8.83422	9.85802	9.63137	8.68909	9.08082	8.92853	8.5149	9.12063	8.89929	9.08312	9.74391	9.33157	8.67117	9.42537	8.93825	9.35823	9.37116	8.81884	9.58345	8.95007	9.32001	8.66413	8.50577	9.20269	9.08669	7.89444	9.05341	8.88935	9.10125	9.36224	9.08932	9.08379	9.2288	9.02964	9.47772	9.31057	8.44779	9.23201
AURKB	1.46398	3.15684e-08	3.5975e-07	7.96539	6.50141	7.88368	7.78081	7.76403	7.1273	8.00705	7.90013	8.29883	8.87437	8.00404	9.34073	7.87422	7.36465	7.13667	7.63234	7.35614	7.60961	7.94666	7.42257	7.88526	7.99732	6.98637	7.71985	8.19336	7.48958	8.49297	8.46972	9.42414	8.84111	5.91343	7.51993	8.03141	6.5698	7.60448	6.91206	7.41314	7.71333	7.50769	7.6088	7.98026	7.56974	7.86704	7.61627	7.91067	8.83693
AV4S1	2.34363	8.90613e-09	1.1435e-07	8.22149	5.87786	7.52356	8.40295	9.28917	7.61249	8.63308	8.70089	7.82473	8.80318	9.00141	7.80706	8.48414	8.7422	8.55948	7.45148	8.78789	7.97535	9.30031	9.20938	8.21126	8.74291	9.00746	8.7186	9.09136	9.21395	8.79683	7.71414	7.91437	7.44229	6.67669	8.70232	8.33504	7.53308	9.22368	9.46967	9.40481	10.1477	9.0762	9.05397	9.80997	9.83361	9.76668	9.27521	6.60958	7.36824
AX747132	0.839593	0.00024992	0.00110496	7.6536	6.814	7.2369	7.36882	6.38069	8.36723	6.88694	7.50791	7.18227	7.45092	7.38594	8.65859	8.6568	6.97118	7.07497	7.16421	7.85258	8.55357	6.67005	6.66239	8.31309	7.29721	6.94655	8.24297	7.28879	7.91915	7.52356	7.82329	8.96469	8.02454	8.53971	7.53551	7.0134	7.30324	7.1168	6.97734	7.55903	6.38397	7.16421	7.23228	8.35605	7.81586	7.97377	7.86935	8.26656	8.73555
AX747140	1.18417	1.26688e-16	7.37565e-15	7.53085	6.34667	7.63672	7.69399	7.52502	8.23983	7.38185	7.68565	7.44738	7.61096	7.69906	7.51412	7.61306	7.49482	7.36484	7.46807	7.76627	7.35446	7.54832	7.86682	7.57043	7.37064	7.70751	7.45522	7.43046	7.98103	7.60722	7.62543	8.08826	7.39021	6.91753	7.62661	8.1322	7.96254	7.66733	7.56578	8.00749	7.65287	7.83946	7.66751	7.3324	7.63864	7.79974	7.81432	7.25347	7.21748
AX748294	0.797362	0.00421327	0.0122335	8.16832	7.37096	8.22835	8.32706	8.85793	8.22196	8.55598	8.5721	7.8147	8.44028	8.70864	7.90553	8.40357	8.64439	8.2191	8.11038	8.35791	7.95311	8.77724	8.97231	8.17285	8.61746	8.92343	8.98409	8.88875	8.61882	8.72446	7.92556	8.34452	7.92518	8.23101	8.39718	8.5885	8.14407	8.36988	9.04725	8.56251	9.01814	8.49504	8.51239	8.60902	8.69195	8.91383	9.2674	6.82506	7.17462
B3GALT6	0.73377	0.00010553	0.000521496	8.70316	7.96939	8.31556	8.76069	8.80237	9.05923	8.61493	8.75474	8.70544	8.62476	8.1925	8.70112	8.79095	8.22874	7.95311	9.38697	8.29154	8.05345	7.89304	8.52028	8.62657	8.16082	8.09435	9.01848	8.41383	8.89443	8.25728	9.37584	8.63357	8.83942	8.87489	9.01814	8.75839	8.66618	8.50153	7.89047	8.62365	8.30957	8.63572	8.06358	8.75149	8.62284	7.85865	7.8045	9.29679	8.52902
B3GAT1	0.768234	0.0247844	0.0522594	8.47233	7.7041	8.20284	8.72714	9.29141	7.63315	8.84205	8.92226	8.15003	9.02465	9.14464	7.75894	8.5464	8.85057	8.96009	7.89304	8.54909	7.78783	9.20344	9.23165	8.50082	8.98255	9.23914	9.17737	9.05341	9.022	8.94107	8.15742	8.45186	8.33193	5.44755	8.70736	9.06726	7.52762	9.60498	9.4355	9.33827	9.82863	9.12155	9.32917	9.50881	9.85042	9.50839	9.45582	7.1759	7.65229
B3GNT2	0.818221	6.72763e-08	7.10656e-07	9.97461	9.15639	10.3524	9.97149	10.4202	9.91803	10.0863	10.0932	10.0874	10.0462	10.2678	9.86539	10.1383	10.1398	9.99919	9.61916	10.1567	10.021	10.3455	10.172	9.94754	10.0486	10.3976	10.245	10.0234	10.3277	10.0548	10.0051	9.39757	9.55718	9.85849	10.0938	9.8672	9.78277	10.1907	10.0297	10.349	10.4375	10.1581	10.3051	10.1034	10.2435	10.4139	10.5211	9.72639	9.4753
B4GALT5	0.675342	0.000356385	0.00149919	10.1039	9.42855	10.62	9.92243	9.78972	9.98047	10.0869	10.3908	10.0297	9.81092	10.5789	10.9101	10.1866	10.8812	9.94527	9.92785	10.1157	10.7967	10.5333	9.53055	9.52648	10.6356	9.90323	10.4265	10.1573	9.04934	9.7982	9.7937	10.1216	9.72592	10.9986	10.4368	9.54556	9.20602	9.52813	9.36033	10.196	8.95375	9.99636	9.73833	9.11991	9.8396	9.97317	9.88755	9.72218	10.9599
BACE1	1.68293	2.77326e-09	3.94358e-08	10.3697	8.68673	9.90675	10.8387	11.1429	9.42867	10.5061	10.7865	9.92607	10.3835	11.1093	10.0569	10.7286	10.7632	10.4654	10.0141	10.724	10.1542	11.3459	10.7821	10.1981	11.003	11.37	10.8452	11.1598	10.9692	10.9021	10.1403	10.1934	9.91958	8.21222	10.6258	10.6806	9.00775	10.8169	11.1152	11.0141	11.2898	10.8387	11.1377	11.1081	11.1329	11.4468	11.5334	9.44012	9.65927
BACE2	1.33328	2.05621e-08	2.44142e-07	9.44129	8.10801	10.4556	8.94313	9.51944	9.80475	9.24071	9.71102	9.86178	8.19721	8.87946	9.40825	8.61746	10.2444	9.75066	7.7679	9.30989	8.68636	8.86314	9.42453	9.75376	9.70417	9.99573	9.09706	8.92406	8.77053	8.84976	10.4784	9.10028	9.07811	10.359	9.37928	9.30254	8.99525	9.3444	9.32998	9.12903	9.76526	10.1535	9.46805	9.05159	9.15804	8.27519	8.98308	10.658	9.9207
BAGE2	0.757533	0.0153471	0.0354259	7.76103	7.0035	7.24042	7.87856	8.83445	6.73648	8.11615	8.3837	7.54174	8.17806	8.30358	7.09465	7.75931	7.78	7.70203	7.6066	7.85989	7.42608	8.55255	8.19538	7.55694	8.21356	8.80237	8.33906	8.59912	8.42984	8.3586	7.91683	8.22301	7.72584	7.1551	8.32811	8.71144	6.74923	8.23058	8.95118	8.68636	9.25122	7.81052	8.36103	8.53875	8.33257	8.8571	8.62721	6.35883	6.83378
BAIAP2L1	0.867864	4.65361e-08	5.11406e-07	9.50044	8.63257	8.90624	9.89584	10.0234	9.36461	9.48166	9.29605	9.74438	9.87446	9.63278	9.6139	9.4355	9.544	9.71537	9.51054	9.93115	9.09881	9.78927	9.64747	9.11412	9.76358	9.83069	9.20906	9.97986	9.88161	9.9009	9.8058	9.21185	9.03023	8.74359	9.66665	9.61341	9.25083	9.64791	9.66968	9.64512	10.0932	9.42655	9.69771	9.74148	9.71962	9.63051	9.80949	8.7001	9.38507
BAK1	1.52972	7.82437e-10	1.24667e-08	7.53218	6.00247	7.21943	7.54404	7.44717	6.68402	7.16736	7.392	8.13876	7.82218	7.96294	7.23904	6.68184	7.19633	7.61365	7.53861	7.49482	8.47287	7.65555	7.9729	7.22813	6.6423	8.42023	7.66047	7.52534	7.19589	9.18378	8.12408	7.17613	7.46251	7.43308	8.74006	8.61641	7.06762	8.66547	8.93344	8.70171	7.70468	7.25979	7.10108	6.81713	7.11244	8.37364	7.83328	7.02732	7.23477
BARD1	0.642504	1.88667e-05	0.000115636	8.26616	7.62366	8.16282	8.58711	7.98282	7.89005	9.02902	7.96501	9.05675	8.41294	8.35581	8.9338	8.33669	8.16807	7.91457	8.40482	8.16361	8.53178	8.42706	7.91505	8.04955	8.35451	7.90534	7.95513	8.01965	7.58324	7.98428	8.49735	8.28689	7.68326	8.58117	8.38936	7.79682	7.98263	7.67911	7.1891	8.13791	7.79292	8.17416	7.70988	8.4984	8.04717	8.80641	8.27409	8.38504	8.34363
BARX1-AS1	1.36427	6.54725e-05	0.000346167	8.21556	6.85129	8.1097	8.88416	9.43601	6.52622	8.82807	8.99789	8.25283	8.80077	8.94497	7.65229	8.84534	8.70112	8.58304	8.43356	8.76667	8.24401	8.92885	9.09738	8.12483	9.13421	9.32526	9.08799	9.03808	9.11094	8.96897	8.72764	8.36535	7.77264	7.13758	9.16032	8.79606	6.43802	8.78095	9.15402	8.60623	9.26847	8.26461	8.90853	9.09906	9.26107	8.83009	8.94896	6.52269	7.34702
BBOX1	3.82055	8.24458e-16	4.14585e-14	10.2443	6.42375	9.97267	10.9986	11.3999	9.04146	10.776	11.024	9.81734	10.8764	11.0154	9.11824	10.6691	10.3844	10.4483	9.7489	10.4334	9.66164	11.4426	10.9021	10.2083	11.3413	11.3791	10.2717	11.1169	11.372	11.0757	9.92017	10.4546	9.49992	10.7176	10.43	10.7742	6.89228	10.7908	11.0003	11.086	11.0788	10.9737	11.1918	11.2798	11.2288	11.4139	11.7762	8.71123	9.73934
BC017398	2.4647	2.8469e-07	2.64785e-06	8.36167	5.89696	6.75608	6.13501	7.8472	8.2903	9.32642	9.1866	6.43863	8.3339	8.48927	8.96838	8.43525	8.21205	4.49817	7.87915	9.34111	9.32563	8.05594	9.5925	9.17811	8.51781	5.99604	8.48899	8.03248	9.91749	9.29064	8.97498	8.51868	8.69331	6.56351	9.67717	8.55896	9.31409	8.89205	7.09254	9.39445	6.51282	8.7431	9.43212	9.57752	10.5492	9.26661	9.3444	6.95409	7.85016
BC017988	0.709483	5.74442e-05	0.000307804	5.01909	4.3096	5.12039	5.15851	5.16017	4.99667	4.81144	4.89211	5.26905	4.6169	5.23359	5.18463	5.19304	5.01613	4.82834	4.95861	4.78377	4.5167	5.02574	5.21452	5.27067	4.98839	4.83278	4.96462	5.33434	4.78641	4.80733	4.77982	4.84175	4.63061	5.58486	5.07528	5.32986	5.48571	5.02342	5.53138	5.10987	5.29666	5.64569	6.40619	4.67635	4.99715	6.09193	5.63801	3.83303	4.74102
BC027448	1.10267	0.00120161	0.00423748	9.00255	7.89988	8.65954	9.14104	9.78429	8.31003	9.1467	9.32642	8.94371	8.9456	9.59465	8.1626	9.4753	9.59764	9.36618	9.049	9.53613	9.19972	9.80629	9.44012	9.13559	9.5373	10.2378	10.1295	10.1529	9.36427	9.58874	9.06017	9.01128	8.5168	8.14963	9.7735	9.5432	8.35605	9.37084	10.3455	9.55771	9.72001	9.32563	9.93805	9.40789	9.28819	9.94312	10.4774	7.7489	8.03141
BC028670	1.24475	0.0198136	0.0435731	8.1388	6.89405	7.84076	8.79912	9.62902	5.84743	8.82054	9.03871	7.66282	8.91206	9.1866	6.92024	8.69382	8.86988	9.03527	8.06255	8.80127	7.88247	9.54836	8.90123	8.25004	9.35253	9.47215	9.06087	9.70937	9.47385	8.99555	8.43935	8.29992	7.56956	6.44862	9.0633	8.82212	5.4405	8.9389	9.38395	9.36808	9.99298	8.68159	9.41288	9.43833	9.40305	9.56869	9.544	5.8692	6.75647
BC036830	0.812015	0.00220166	0.00709592	7.58772	6.77571	7.37523	7.3138	8.50696	7.32783	7.65709	7.99083	6.98674	7.5234	8.12954	7.12005	7.53042	7.67986	7.68963	7.35376	7.65155	7.21092	8.52384	8.22503	7.38992	7.83265	8.56328	7.67587	8.18028	8.11572	7.76645	7.27886	7.18182	7.40807	9.83014	7.79086	7.28135	7.17659	7.79272	8.77698	8.40384	8.64613	7.59219	8.13286	7.71788	7.78019	8.84922	8.33525	6.34547	7.14072
BC039122	2.12982	1.60015e-08	1.94082e-07	8.35719	6.22737	8.24612	8.58383	9.48942	7.98345	8.84172	8.89759	7.86591	8.8043	9.08407	7.54637	8.70379	8.52792	8.88338	8.63233	8.7446	8.07913	9.1809	9.27116	8.43548	8.92497	9.09167	8.74677	8.94075	9.22099	8.95713	8.35222	8.52052	8.15742	7.31929	8.85592	9.10669	8.23624	9.07106	9.70197	9.41017	9.82521	8.7971	9.05707	9.52393	9.56207	9.50193	9.39284	6.65899	7.17189
BC039357	0.797249	0.0242898	0.051425	8.89467	8.09742	8.77082	9.13525	9.74148	8.25024	9.14257	9.46138	8.90218	9.19304	9.47385	8.55847	9.17844	9.17584	9.45338	8.80783	9.12665	9.01435	9.68214	9.34373	8.75005	9.56451	9.65531	9.48773	9.70527	9.72825	9.4117	9.31624	9.32998	8.65598	5.4708	9.74487	9.93859	8.03017	9.29995	10.0452	9.64267	10.2182	9.26998	9.81771	9.60909	9.62142	9.65254	9.73407	7.61155	8.20186
BC039485	0.622323	0.000200653	0.000911263	5.95174	5.32942	6.1592	5.38219	6.3889	6.08066	5.71798	6.63301	5.62135	5.8067	5.96065	5.99886	5.68903	6.00225	6.50799	5.55549	5.81616	5.8545	6.18828	6.19542	5.65351	6.49564	6.20691	6.03406	7.28038	6.02598	6.07885	5.03875	5.73751	5.55884	6.01066	6.02988	5.719	6.06765	5.8433	7.14265	6.40193	5.89711	6.10965	6.92172	5.74812	6.02243	6.70345	6.65924	5.57377	5.68345
BC040646	0.681194	3.02931e-06	2.23151e-05	5.41238	4.73118	5.30198	5.7997	4.88411	5.45297	4.65524	5.33364	5.68676	5.19754	5.02685	5.98516	5.17148	5.30048	5.51066	5.64783	5.33888	5.56682	4.84053	4.94187	5.67721	5.30424	5.07574	5.28041	5.28682	5.32496	5.43201	5.52165	5.7119	5.5881	4.82771	5.62166	5.62932	5.65027	5.43952	4.87222	5.16388	5.13304	5.26648	5.31648	5.08994	5.45954	4.60353	5.25276	5.9421	5.60436
BC040833	1.47988	5.05967e-13	1.47097e-11	6.75327	5.27339	6.91043	6.90862	7.34305	7.00087	6.49999	6.67088	6.40015	6.63604	7.18207	6.36691	6.65549	6.88366	6.92846	6.88384	6.90203	6.75984	6.86318	7.18836	6.69272	6.87959	7.26511	6.81887	6.60895	6.73673	7.05489	7.03373	6.88713	6.71745	5.99302	7.35428	6.76665	7.3313	6.87126	7.30535	7.1659	7.19532	7.1774	7.0214	6.87536	6.78936	8.09243	7.85723	5.91221	6.34963
BC045805	0.876021	1.56446e-13	5.11356e-12	6.47295	5.59692	6.32786	6.48252	7.41799	6.72933	6.33184	6.58806	6.41914	6.54825	6.5808	6.54825	6.67142	6.40701	6.38028	6.53372	6.25079	6.54575	6.51118	6.58517	6.24388	6.5091	6.3618	6.6421	6.68439	6.55201	6.65395	6.35262	6.63503	6.8803	5.28435	6.26307	6.31596	6.46044	6.30313	6.35167	6.3681	6.68612	6.25741	6.31254	6.47304	6.6865	6.37633	6.79294	6.54265	6.40411
BC048997	1.22403	2.10669e-16	1.1814e-14	6.09752	4.87348	6.10829	6.04683	6.00333	6.50952	6.38069	6.20318	6.58152	6.28578	6.48634	6.47196	6.45514	6.4686	5.98495	6.39344	6.15033	6.37208	5.98872	6.46679	6.42067	6.40455	6.14755	6.15873	5.89923	5.98284	6.19226	6.40807	6.05327	6.42423	6.44637	6.32042	6.42013	6.28343	6.0639	6.19312	5.93775	6.10683	6.15832	6.37736	5.74245	6.13607	6.22033	5.83518	5.67286	5.42825
BC052578	1.23992	4.00287e-16	2.1499e-14	6.76252	5.5226	6.56676	6.91547	6.63997	6.81325	7.08438	6.69854	6.97309	7.18042	7.27688	7.38309	6.96725	6.75366	6.93741	7.40036	6.70382	6.85939	6.81967	6.43522	6.36204	6.93463	6.43367	6.83635	6.4861	6.74607	6.70944	7.35777	6.87985	7.4684	6.29925	7.00671	7.2707	6.97309	6.80168	6.71931	6.53717	6.24989	6.67088	6.69933	6.49321	6.38092	6.29146	6.21637	7.02049	6.44928
BC150507	0.865388	0.0191342	0.0423722	8.5116	7.64621	7.7825	8.79287	9.25712	6.05955	8.82411	8.89178	8.29497	9.03638	8.91151	7.19194	8.68759	8.46667	9.15431	8.63069	8.71826	8.30545	9.01483	8.4552	8.57052	9.48382	9.20344	9.13646	9.41853	9.47859	9.35093	8.66547	8.71572	8.2705	5.56262	9.52703	9.33643	5.73676	8.96254	9.48859	9.24095	9.80629	9.01814	9.24999	9.52648	9.53847	9.27982	9.46805	7.6441	8.68669
BCAR4	0.843446	0.00361542	0.0107569	6.2193	5.37585	5.81041	6.07381	5.92349	5.8077	5.8457	5.81841	6.09387	5.74161	5.86033	6.23279	5.78234	6.0587	6.01426	6.12003	5.89424	6.04575	5.78825	5.83934	6.28839	9.52393	5.89902	6.05288	5.96065	6.05775	5.99867	6.13311	6.13245	6.21613	7.01304	6.42736	6.23045	5.6678	5.95265	6.12003	6.12963	5.93445	5.80436	6.02551	5.64385	9.21689	5.60456	5.65027	6.04286	6.14279
BCKDHA	1.19191	0.00990402	0.0248879	12.0154	10.8235	11.1314	12.3248	12.5867	9.25838	12.237	12.5259	11.9657	12.1181	12.5955	11.0199	12.5377	12.3374	12.4488	11.9657	12.3713	12.2081	13.1765	12.1922	12.1127	12.6923	13.2338	12.4768	13.0791	12.6135	12.7512	11.8211	11.9462	11.2113	8.88243	12.6627	12.5867	8.86081	12.8193	13.1381	12.7962	13.4681	12.8714	13.3225	13.4103	13.2938	13.1765	13.4681	11.2724	12.0974
BCL11A	1.2796	1.76966e-10	3.21348e-09	8.71535	7.43575	9.11753	8.50346	9.05583	8.10848	8.67827	8.76159	8.94465	8.62899	9.08018	8.36029	8.52969	9.72916	9.25799	8.56999	8.63846	9.3635	8.47333	8.64742	8.70404	9.12353	9.17157	8.76159	8.852	9.32917	8.95656	8.49659	8.87641	8.56104	8.36301	9.36393	8.51411	8.84315	8.51366	8.67759	8.77598	8.50944	9.36927	9.09525	8.63954	9.56053	8.89613	9.15328	8.14921	8.75578
BCL9L	1.72018	3.21555e-09	4.51746e-08	11.3737	9.65355	10.8027	11.5311	11.8681	10.2692	11.4819	11.5915	11.1918	11.3999	11.8895	10.5932	11.6529	11.6293	11.6729	11.0582	11.6833	11.2066	12.0394	11.5179	11.3337	11.8963	12.1922	11.8681	12.0147	11.9204	11.853	11.3064	11.2268	10.6447	9.85626	11.7525	11.808	9.93693	11.9317	12.187	11.9462	12.392	11.9384	12.1023	12.3598	12.4768	12.3852	12.3713	10.4616	11.1314
BCORP1	1.56639	5.35486e-17	3.32932e-15	5.7437	4.17731	5.84382	5.66723	5.4226	5.87086	6.00096	5.62841	6.16796	5.7256	5.78586	6.1318	6.10341	5.93987	5.84278	5.80181	5.7619	5.9542	5.44302	6.41059	5.65293	5.57741	5.98082	5.85099	5.47868	5.66365	5.7614	5.81879	5.8692	5.77794	6.21908	5.88016	6.21613	6.19354	5.84884	5.67886	5.44112	5.56569	6.47681	5.62135	5.72743	5.74366	5.06647	6.00722	5.43982	5.29853
BCRP3	0.645892	5.24079e-07	4.62435e-06	5.82455	5.17865	5.657	6.17365	6.15464	5.95997	5.44212	5.40202	5.79079	5.96801	6.19354	5.41793	5.81859	5.55766	5.59304	6.19542	6.10913	5.79695	5.8931	6.42696	6.09083	6.13354	5.55193	5.70325	5.79562	6.10514	6.00613	5.85001	6.04265	5.86545	5.32986	6.05435	5.45419	4.92659	5.49958	6.06437	6.25741	5.82771	5.30088	5.16808	5.92233	5.46376	6.34812	5.6943	6.48979	6.04446
BCS1L	0.826976	0.0125164	0.0300658	10.0219	9.19493	10.0452	10.3812	10.9883	9.61596	10.6886	10.3778	9.79082	10.4784	11.0254	9.26442	10.4446	10.8826	10.3371	10.0708	10.4483	9.9207	11.086	10.606	9.91901	10.9282	11.5535	11.1799	11.0003	10.9348	10.701	9.73167	10.2444	9.72268	9.00497	10.5003	10.8873	9.40481	10.235	10.8798	10.5864	10.0899	9.50193	9.79033	9.9249	10.5333	10.632	10.9046	8.6778	9.62636
BEND3	0.816687	3.73341e-05	0.000210551	8.19868	7.38199	8.27766	8.04012	8.03796	8.07576	8.0999	8.75787	7.63585	7.72574	7.80687	8.6803	8.03017	8.05372	7.77944	8.25846	7.81182	9.55718	8.16418	7.9691	7.58677	7.76275	7.49149	8.30204	8.02934	7.18458	8.02831	7.8938	8.70688	8.72358	7.97554	8.75199	8.04618	7.76403	8.46112	6.94996	8.25616	8.00728	7.48	7.67849	8.07644	7.3354	8.73263	7.98122	8.37887	8.69167
BEST1	3.60633	2.8299e-29	1.96207e-26	10.7251	7.11875	10.6029	10.9188	11.2678	10.4946	10.8338	11.0566	10.5149	11.0056	11.1106	10.2182	10.9654	10.9737	10.9986	10.546	10.8754	10.5047	10.9173	11.1932	10.6559	11.1195	11.2288	11.2505	11.2179	11.1918	11.1671	10.5434	10.8375	10.2959	10.0293	11.0582	11.2708	10.1768	11.0071	11.3375	11.3437	11.6667	11.0582	11.1763	11.3011	11.3294	11.37	11.2973	9.86981	10.2818
BEST2	1.13628	0.0179837	0.0402806	8.93774	7.80146	8.65118	9.55021	9.91092	7.85723	9.61772	9.85252	9.0864	9.62095	9.94312	8.29904	9.56823	9.46805	9.43338	8.72415	9.4355	8.72581	9.96791	9.8367	9.09284	9.74189	10.2541	9.79666	9.97081	9.89471	9.72164	9.03985	9.21569	8.44279	5.65376	9.84878	9.66078	7.13098	9.80779	10.4249	10.1567	10.5191	9.55534	10.0519	10.1262	10.0015	10.19	10.4066	6.99929	7.49134
BGLT3	0.634107	0.000594083	0.0023259	7.59653	6.96243	7.79459	7.57642	7.97009	7.95353	7.96744	7.86027	7.2552	7.67156	8.03753	7.52534	7.39742	7.64973	8.14548	7.64149	7.61422	7.53947	7.92483	8.08378	7.4517	7.88349	7.82901	7.57428	8.16807	7.97308	7.69025	7.10535	7.28398	7.13293	5.95672	7.63714	7.80219	7.70241	8.01201	8.60059	7.89588	7.63923	7.9555	9.13354	7.28459	8.01441	8.36879	8.19942	7.1297	6.95789
BHLHE41	0.739452	9.61111e-05	0.000481397	9.92308	9.18362	10.2419	10.2054	10.2582	9.90675	10.0317	10.1008	9.71627	10.6682	9.68703	9.90496	10.139	10.1634	10.7505	9.88358	9.21324	9.6968	9.30296	10.4765	9.8434	9.77513	10.0999	9.89413	9.981	10.1973	10.2701	10.4689	9.04423	10.6439	10.0371	10.3379	10.6456	7.5713	9.84441	10.1186	10.4809	9.94431	9.38479	9.97813	10.1094	9.81238	9.2594	9.93115	9.01282	9.86829
BICD1	0.82726	0.00202225	0.00660137	10.0891	9.26179	9.78067	10.2534	10.6917	9.72218	10.3462	10.615	9.46035	10.1235	10.5191	9.92712	10.7351	10.4334	10.5711	9.96669	10.1727	10.2419	10.8566	10.632	10.5157	10.3539	10.9188	10.327	10.6767	10.5123	10.4862	10.0038	10.039	9.89867	8.32178	10.1836	10.17	9.41502	10.2534	10.616	10.8338	10.8159	10.1417	10.8231	10.701	10.5105	10.9667	11.0729	9.54556	9.57996
BIRC5	0.862152	1.15516e-08	1.44505e-07	7.52939	6.66724	7.29743	7.58112	7.45924	7.15291	7.49042	7.53861	7.24401	8.1582	7.18856	7.39764	7.16041	6.97005	6.88774	7.88426	6.93978	7.44778	7.49251	7.41486	7.05114	7.58149	7.23279	7.33204	7.75348	7.08265	7.67299	7.61905	8.1845	7.75931	7.56974	7.68683	8.25487	6.76542	7.91854	7.19726	7.18928	7.66711	7.12226	7.40807	7.46536	7.11808	7.43705	7.41213	7.51348	7.92144
BIRC6	1.03635	0.000429143	0.0017543	11.2662	10.2298	11.1799	11.7236	12.1023	10.3128	11.8276	11.5284	10.7908	11.7116	12.3852	10.4493	11.6729	12.0346	11.1918	10.7383	11.7824	10.9615	12.6821	11.9346	11.1633	11.7419	12.7403	11.7153	11.9829	11.8142	11.5885	11.1652	11.089	10.7622	9.74438	11.3755	11.4115	10.1748	11.638	11.9495	11.7236	11.4341	11.3337	12.0682	11.4426	11.7359	12.7962	12.4606	10.1505	10.7064
BLACAT1	2.28025	3.73431e-10	6.36195e-09	9.80699	7.52674	10.7577	10.2516	9.96259	10.0354	10.3347	10.2154	9.70009	10.3778	11.0169	9.49588	10.4432	10.4871	10.1844	9.51554	10.6211	9.97877	10.3098	11.4026	9.85742	9.49741	10.9215	10.5035	9.58045	10.1034	10.4828	9.35009	9.68263	9.1464	8.79047	10.0057	9.7982	10.2914	10.6191	10.7705	10.4221	10.4184	10.632	10.363	10.4774	10.2717	10.8764	10.9896	8.02596	9.16392
BLM	1.10633	9.96577e-05	0.000496336	9.41451	8.30818	9.64267	9.39883	10.0367	9.73889	9.64215	9.59374	9.05483	9.69171	10.2865	9.30632	9.2436	9.57833	9.39601	9.44436	9.69822	9.13251	9.93752	10.3468	9.25182	9.71627	10.0107	9.57106	9.85154	9.86598	9.49276	9.17364	9.85802	8.65954	8.11981	9.79082	9.69442	9.22165	9.59719	9.96203	9.97935	10.468	9.92607	10.1921	9.86178	10.2906	10.5087	10.5157	7.98527	8.91029
BMP8A	0.69799	0.00645928	0.0174877	9.44015	8.74217	9.18862	9.59764	9.80091	8.25681	9.57224	9.53095	9.02067	9.62054	9.50193	8.64196	9.66078	9.55771	9.90618	9.44092	9.60112	9.49136	9.6196	9.60823	9.20828	10.0729	10.0543	9.81771	9.91686	10.0287	9.61596	9.00461	9.42258	8.67952	8.04643	9.63051	9.98047	7.81531	9.85042	10.3468	10.1829	10.5502	9.91507	9.94431	10.2246	10.2818	10.3548	10.2672	8.93344	9.72359
BMS1P6	0.766647	0.042661	0.0806414	10.2802	9.51351	9.93991	10.6767	11.2343	8.93456	10.5492	10.7341	9.91958	10.6191	11.0448	9.39805	10.733	10.651	10.7018	10.01	10.596	10.1014	11.1932	10.7341	10.2066	10.8705	11.3138	10.8302	11.288	11.1799	10.9836	9.82521	10.3432	9.37883	8.19721	10.7167	10.5079	8.60598	11.1329	11.47	11.0773	11.7988	11.0566	11.4115	11.6188	11.641	11.5915	11.578	9.00684	9.95238
BMX	1.15313	2.58391e-11	5.49951e-10	6.70426	5.55113	6.85553	6.46924	7.26883	7.05562	6.95867	6.92846	6.42131	6.71479	6.82669	6.34999	6.26944	6.62127	6.60248	6.06782	6.55284	6.43762	7.21073	7.08465	6.31346	6.43822	6.78324	6.704	7.39861	6.83536	6.66506	7.07773	7.03349	6.80397	5.36716	7.14371	7.12636	6.14598	6.53299	6.75608	7.18438	7.29743	6.13916	6.39438	6.56085	5.86617	6.77955	6.59349	7.10036	6.29189
BOP1	1.08761	3.60191e-06	2.60168e-05	8.41956	7.33195	9.41464	8.45585	8.11635	9.62544	7.10545	8.97551	8.22786	8.36103	8.1692	7.99833	8.06542	8.63418	7.78099	8.82519	7.67438	8.52655	8.56302	8.02297	8.04112	8.4839	7.81241	8.5168	8.99499	8.58588	8.13014	8.31533	8.4161	8.78152	7.99917	7.3257	7.72434	9.51054	7.77035	7.02755	7.21134	8.36608	8.49241	8.37101	7.91999	8.40208	7.64149	7.67911	8.75363	8.84922
BPI	0.737946	0.0019535	0.00641538	7.87102	7.13308	7.388	8.16199	8.63447	7.12153	8.59762	8.35271	7.64288	8.1653	8.40135	7.30717	8.25168	8.28543	8.22283	7.97535	8.27092	7.89884	8.39227	8.24946	7.87816	8.45119	8.67459	8.61301	8.54279	8.28207	8.18878	7.86726	8.15762	7.84017	6.25152	8.23624	8.24863	7.08244	8.35451	8.61225	8.37074	8.44856	8.01114	8.29154	8.285	8.27858	8.53011	8.72081	7.09802	7.07842
BPIFA1	0.590043	0.0480666	0.0887981	8.4971	7.90705	8.40862	8.83268	9.55076	7.76719	8.97976	8.97754	7.8829	9.03204	8.9027	7.79974	8.59385	8.87916	8.8067	7.98345	8.789	8.18268	9.45375	9.28241	8.41468	9.07325	9.24827	8.54061	9.50364	9.34771	8.7939	8.21637	8.49712	8.07143	5.99249	8.78692	8.97419	7.74275	8.57074	9.48596	9.18052	9.78872	8.99365	9.22339	9.39206	9.36734	9.60498	9.13452	7.62176	7.59394
BPIFA3	0.698239	0.0254142	0.0533074	7.76522	7.06698	7.53749	8.27884	8.85467	6.9735	8.67385	8.30417	7.39493	8.33109	8.30222	6.61213	8.06601	8.0999	7.65928	7.89485	8.18493	7.55619	8.73105	8.65143	7.61187	8.42791	8.77937	7.98941	8.99819	8.84716	8.44279	7.52639	7.87596	7.40401	7.05174	8.29662	8.10557	6.60168	7.92483	8.68986	8.17377	8.61387	7.65669	8.72197	8.42074	8.24906	8.60485	8.46014	7.46464	6.46114
BPIFA4P	0.781856	0.00732628	0.0193876	8.34552	7.56367	8.52052	8.7001	8.88186	8.63026	8.55031	8.59604	8.39676	8.5168	9.13086	8.60166	8.57025	8.86845	8.31113	8.40024	8.49092	8.0856	9.17053	9.285	8.25744	8.73333	9.05049	9.28046	8.87677	8.65841	8.47916	7.9693	8.27766	7.78141	7.36504	8.58383	8.54044	8.71433	9.05159	9.47898	9.4891	8.51845	8.71408	8.77108	8.63069	8.7958	9.46613	9.65732	7.27943	7.07059
BPY2	0.746072	0.00102383	0.00369717	6.11077	5.3647	5.85641	6.07839	6.56652	5.36599	6.16331	6.42341	5.69858	5.97693	6.50488	5.20164	5.74366	6.1667	5.65351	6.08654	6.22157	6.37018	6.071	6.69249	5.79131	6.08846	7.56897	6.69067	7.71469	5.74968	6.61248	6.16609	5.90719	6.12963	5.92899	6.89901	6.96172	6.0301	6.40881	7.07153	6.04468	7.24178	6.23769	6.6734	5.8349	6.58226	6.68145	7.40411	5.39937	5.34747
BRCA2	0.588706	1.25388e-06	1.01805e-05	6.5639	5.97519	6.79625	6.59209	6.58942	6.46538	7.01356	6.6534	6.96929	6.71886	7.00087	6.62312	6.69051	6.50106	6.47345	6.74023	6.42924	7.0859	6.74023	6.68671	6.8567	6.56901	7.26674	7.01437	6.13376	6.06825	6.61558	6.63728	6.57761	6.5866	6.62085	6.8605	6.80503	6.56209	6.28597	6.80903	6.71931	6.20396	6.77183	6.30639	6.42991	6.49957	6.55201	6.82636	6.12351	6.2872
BRI3BP	0.896818	0.0156661	0.0360024	11.5221	10.6253	11.1918	11.846	12.1594	10.4546	11.9281	11.9384	11.256	11.8378	12.1815	10.8038	11.9462	11.9908	11.7824	11.3736	11.8577	11.478	12.4432	11.9614	11.5154	12.0634	12.6234	12.1286	12.3598	12.1648	12.0445	11.3678	11.5483	10.9146	9.17679	11.9462	12.0775	9.91854	12.1338	12.4864	12.2265	12.7213	12.0974	12.5377	12.5377	12.5101	12.6336	12.6821	10.48	11.1932
BRIP1	1.45459	2.26581e-07	2.14656e-06	7.02081	5.56622	7.3145	6.35599	5.70479	6.82276	6.14033	7.35844	7.75441	6.95789	6.47066	7.89946	7.1023	6.07608	5.74838	7.92289	6.66947	8.34912	7.63769	6.32332	6.8779	6.90127	6.48133	6.59893	6.64049	5.76685	7.24408	7.67356	8.02088	6.63581	6.53569	6.63278	7.37421	6.00432	8.01518	5.99151	6.34401	6.5317	6.74162	5.88579	7.43232	5.76097	7.16319	7.04286	7.22689	8.0658
BRPF1	0.768939	0.0110756	0.0272367	10.652	9.88305	10.3828	10.8566	11.258	9.82062	11.0954	10.6532	10.5157	10.7885	11.294	10.0216	11.2081	11.1456	11.1273	10.4662	11.0803	10.6724	11.6127	11.1358	10.658	11.0492	11.6729	11.294	11.3564	11.2015	11.1413	10.4899	10.4986	10.1581	9.62544	11.0389	10.8124	9.79666	11.1785	11.5202	11.2066	11.3736	10.8512	11.7027	11.4187	11.4509	11.7851	12.0775	9.65531	10.0773
BRSK2	0.661486	4.2251e-05	0.000234523	6.80178	6.14029	7.2377	6.82415	7.25245	7.27132	6.84768	6.77123	6.61715	7.10304	7.24098	6.54731	6.73737	6.53736	6.76781	6.76436	6.87255	6.70846	6.96802	7.24931	6.83054	6.73757	7.17659	6.81031	7.0861	6.96865	6.98119	6.61574	6.76868	6.79826	5.60111	6.7749	6.77061	7.38288	7.30101	7.0134	7.27396	7.63653	7.17097	6.87126	7.22287	7.30248	7.37064	7.26415	6.4066	6.3394
BSCL2	1.64615	4.41625e-11	9.01194e-10	9.89127	8.24512	9.99747	10.085	10.2732	9.68599	10.5759	9.86432	9.56369	10.2748	10.1068	9.14792	10.2398	9.84772	10.0135	9.26661	9.96496	9.6182	10.0462	10.1436	9.80873	10.5665	10.5781	9.88983	10.3175	10.6129	10.1436	9.46684	9.57508	9.17554	7.72949	9.9255	10.1198	9.40024	10.4871	10.4154	10.5071	10.2936	10.488	10.9021	10.5999	10.5609	10.9934	10.7485	8.97266	9.83361
BSPRY	0.828655	8.4967e-11	1.64054e-09	7.61193	6.78327	7.7635	7.94261	7.58809	7.496	7.74007	7.51568	8.00128	7.50059	7.31472	7.17566	7.52032	7.61503	7.42725	7.93255	7.63234	7.33221	7.50769	7.34959	7.53087	7.75052	8.0771	7.73157	7.31156	7.20535	7.22494	7.56356	7.40785	7.78081	8.42023	7.66633	7.68525	7.84883	7.29761	7.41176	7.23046	7.77904	8.00911	7.07457	7.37256	7.46807	7.81221	7.36959	7.2816	7.63585
BTBD11	1.80609	1.42128e-16	8.22847e-15	7.16998	5.3639	7.07559	7.36095	7.58344	7.06846	7.45564	7.45378	6.83336	7.44526	7.62661	6.4963	7.38616	7.69618	7.10507	6.79488	7.43843	7.04084	7.91012	7.69002	7.24684	7.19391	7.6268	7.1531	7.58636	7.37922	7.25942	6.59802	6.88848	6.49044	6.50744	7.2203	7.15102	6.95389	7.54426	7.63007	7.57995	7.84804	7.53769	7.67438	7.89325	7.6705	7.92659	7.47665	6.00524	6.92922
BTBD9	0.638273	0.00583223	0.0160502	8.30743	7.66916	8.4095	8.35749	8.47635	7.63923	8.35899	8.38458	8.32745	8.65622	8.60957	8.02547	8.36904	8.48736	8.46034	8.04276	8.47333	8.35451	8.3245	9.06754	8.36657	8.29345	8.74728	9.04204	8.37613	8.50991	8.56178	8.18542	8.1925	7.80198	6.90127	8.43338	8.53773	7.49057	8.80549	9.09772	8.9027	9.86981	8.77671	8.86937	9.02713	9.19845	9.25333	9.00073	7.54982	8.23809
BTG3	0.809548	0.00468108	0.0133512	9.05986	8.25032	8.93252	10.4192	8.34938	10.5157	8.60571	10.0254	9.02158	8.46714	8.98231	9.65826	9.1154	8.47916	8.29579	10.7267	8.9543	8.02793	8.7424	8.9964	9.18231	8.37154	8.59811	8.57187	8.1463	7.56578	9.04549	9.84714	8.93503	8.95603	9.46175	9.24213	8.41179	9.45375	9.38042	7.18815	8.97521	8.34542	8.83422	8.54044	8.07344	8.55505	7.53087	7.58426	9.85042	9.06087
BTNL8	0.888304	0.0251518	0.0528491	9.5227	8.63439	9.33523	9.70809	10.3564	8.99789	9.87126	10.0135	9.14887	10.0925	10.3644	8.69902	10.0715	10.1068	10.007	9.17878	10.0141	9.38434	10.5789	10.5165	9.28854	9.98943	10.6521	10.0743	10.4101	10.1852	9.95297	9.38812	9.59897	8.98502	9.23438	9.87972	10.0158	9.65122	10.0912	10.5999	10.4423	10.9122	10.33	10.423	10.7505	10.7149	10.9821	10.6671	7.79822	8.24847
BUB1	1.11465	1.04282e-13	3.51396e-12	6.93689	5.82224	6.65946	7.12167	6.84768	6.33404	6.88421	6.98099	6.65236	7.37604	6.8805	7.21616	7.27771	6.6463	6.61925	6.73069	6.50646	7.0302	7.04502	6.85054	6.79133	7.16249	6.66947	6.81359	7.12826	6.71384	7.37759	6.80546	7.04901	6.6467	6.39438	6.93523	6.58536	6.38463	7.01512	7.076	7.01474	6.99256	7.13571	6.96595	7.03246	6.96427	7.48756	7.45619	6.63869	7.04446
BUB1B	2.34638	3.45332e-13	1.04652e-11	9.48451	7.13813	9.5825	9.49958	8.39758	9.09772	10.3636	9.70475	9.49631	10.0081	9.29245	10.2066	9.39246	8.3125	7.79822	10.199	8.81632	10.1553	9.09421	9.31254	9.33606	9.58719	8.13667	8.33214	9.79033	8.39737	9.98202	9.61496	10.7566	9.50966	8.56463	9.11717	9.29322	8.38393	9.51995	7.93963	9.63278	8.88463	9.29995	9.37732	9.37084	8.9027	9.52358	9.34334	10.468	10.1027
BVES	0.667767	0.00301332	0.00922831	6.62621	5.95844	6.20979	6.3889	6.9106	7.17913	7.56195	6.35187	6.36972	6.56652	6.8201	6.55912	7.52259	6.50044	6.19542	7.7135	6.56676	6.59692	6.6178	7.08182	6.03978	6.55001	6.97762	7.63277	6.50393	6.17885	6.6112	6.4969	6.37403	6.14661	5.78466	6.55284	6.87556	8.30507	6.78936	7.20707	7.60781	6.70211	6.81927	6.57129	7.05736	6.78601	7.80219	7.26454	5.50142	5.76662
BVES-AS1	0.790102	5.77244e-08	6.20938e-07	5.21149	4.42139	4.90956	5.07869	6.26526	5.20472	5.04361	5.19705	5.07921	4.78311	4.93253	5.06492	5.06911	5.22929	5.52544	5.61127	5.18861	5.04553	4.80949	5.22681	4.98682	6.21567	5.24253	4.81672	6.83478	5.20207	5.22295	5.32986	5.45026	5.15893	4.93494	5.49146	5.08994	4.93046	5.28483	5.45217	5.23256	5.17412	4.96462	5.38364	5.13681	5.12596	5.64875	5.03924	4.85296	5.39281
BYSL	0.760762	0.000214206	0.000965722	7.80678	7.04602	7.47874	7.20458	7.95801	8.15252	7.22394	7.63088	7.44043	8.12203	7.15658	7.98658	7.50751	7.52422	7.29398	8.28787	7.39817	8.37785	7.79665	7.23458	7.99917	7.58842	7.61525	8.29136	7.44868	7.22012	7.84256	7.2083	10.7793	7.82496	8.51385	7.18227	6.77183	7.5557	7.88966	7.91751	7.76701	7.54074	7.39098	7.93118	7.06524	7.25701	7.62566	7.49267	7.49134	8.296
BZW2	1.15949	1.53778e-07	1.51657e-06	10.649	9.48947	11.1444	10.3051	10.7855	11.236	10.201	10.223	10.2126	10.7219	9.44436	11.7177	10.649	11.5801	11.0141	10.5259	10.5035	11.1598	10.0336	10.1874	10.607	11.0187	9.74934	10.3715	10.4028	10.2472	9.99187	9.83278	11.5179	10.7566	10.5695	9.68409	10.2921	10.6479	10.9474	10.7967	10.9173	9.87184	10.8798	9.94881	10.2133	10.8742	10.0467	9.96669	11.5403	10.9986
C10orf128	0.862492	0.0228409	0.048928	9.61245	8.74996	9.40409	10.1484	10.6239	8.56885	10.2525	10.2238	9.48463	9.96843	10.4368	8.92285	10.0615	10.2465	9.96551	9.51236	10.1915	9.37151	10.7908	10.4748	9.5825	10.2847	10.8428	10.2246	10.6249	10.4022	10.2358	9.66812	9.76526	9.40264	6.27796	10.0432	10.2223	8.51977	10.0938	10.6231	10.3198	10.4101	9.90675	10.6837	10.1844	10.3699	10.9215	10.8475	8.06784	8.71357
C10orf35	0.659838	0.0011679	0.00413582	8.49632	7.83648	8.43728	9.03147	7.91111	9.13027	8.18694	8.58737	8.08699	8.33996	7.82591	8.75225	8.50673	8.7211	8.348	8.41716	8.60927	9.01545	8.84028	7.65028	8.62049	8.13414	8.10616	7.94382	8.05895	8.13286	7.8938	8.06255	9.42453	9.08901	9.17772	8.17894	8.26316	8.26402	8.73579	7.26115	7.88327	7.22669	7.77631	8.1461	8.60381	7.81241	8.32662	8.7225	8.97845	9.33347
C10orf67	0.688004	0.026526	0.0551931	8.62862	7.94062	8.42462	8.9552	9.44641	6.77838	8.9392	8.9484	8.39995	9.06673	9.28731	7.77851	8.98198	8.9543	9.00913	8.38056	9.08699	8.60848	9.17772	9.26551	8.68759	9.16136	9.50031	8.95345	9.52042	9.33643	9.15266	8.32832	8.48666	7.96314	7.83241	9.21689	8.82264	7.08324	9.18199	9.48277	9.26785	9.64317	8.98255	9.66164	9.31446	9.49588	9.85415	9.70899	7.66671	8.19103
C10orf88	0.623978	0.00520449	0.0146073	9.1579	8.53392	9.24969	9.11509	9.62853	9.01509	9.60151	9.44755	9.16863	9.43249	9.50455	8.91353	9.51119	9.58139	9.68214	9.45829	9.48859	9.30115	9.62466	9.92785	9.04549	9.30115	10.1529	9.89033	9.5499	9.33894	9.77411	9.60151	9.17157	9.23307	8.21084	9.29064	9.43601	8.6477	9.31446	9.99517	9.75066	9.52743	9.12963	9.1742	9.15205	9.38042	9.65976	9.52358	8.15163	8.52076
C10orf90	1.35884	3.70673e-09	5.14704e-08	7.24925	5.89041	7.51412	7.55918	7.89127	6.60661	7.60158	7.52702	7.30324	7.70885	7.73989	6.95668	7.37278	7.73486	7.40371	7.41896	7.61187	7.4011	7.83091	8.13414	7.59239	7.63259	8.06024	7.57521	7.90716	7.72721	7.37195	7.44508	7.61422	7.68043	7.4432	7.61627	7.46182	6.3909	7.38142	7.3641	7.3782	7.53182	7.181	7.48642	7.17891	7.27963	7.83461	7.59	6.5175	6.36063
C10orf99	1.14974	0.00198726	0.00650478	7.5334	6.38365	7.60351	7.58491	8.13959	7.00843	7.61116	7.8661	9.81382	8.15718	7.94772	6.5067	7.83805	7.57895	7.80768	7.49251	8.07644	7.17026	8.10434	7.74143	7.18438	8.01775	8.25421	7.8649	8.19787	8.01838	7.9539	7.44252	7.86239	7.05952	10.3722	7.99707	8.07619	6.45553	7.862	8.06944	8.03102	8.58255	7.85593	7.97377	8.12862	7.87915	7.93318	7.75538	5.3851	6.89746
C11orf42	0.629343	0.00340255	0.0102246	6.29827	5.66893	6.17236	6.282	6.63168	5.59391	6.59376	7.18245	6.22896	6.5091	6.49874	5.89397	5.87572	6.29632	6.48486	6.06258	5.90626	6.05926	7.96188	6.63258	5.86238	6.3009	6.55955	6.226	6.44986	6.00333	8.09802	6.17365	5.96736	5.89902	6.46399	6.73599	6.04227	5.66652	6.06631	8.64094	6.76401	5.88138	5.73179	6.66967	5.01566	5.5183	6.63707	7.27866	6.08271	6.15812
C11orf44	0.611213	0.0347014	0.0684515	7.71288	7.10167	7.57674	8.11591	8.53516	7.4721	8.38793	7.86647	7.94363	8.386	8.66852	7.37503	7.93779	8.44728	7.93542	7.81726	8.19875	7.24061	8.62534	8.28076	7.86365	8.22431	8.57597	7.9744	8.60352	8.40731	8.11101	7.48134	7.80899	7.26618	6.83015	7.86897	8.20186	7.22147	8.22409	8.55505	8.26383	8.44594	7.66106	7.84883	8.1356	8.24461	8.59312	8.31951	6.36844	7.01396
C11orf63	1.62968	3.79356e-11	7.8478e-10	7.84864	6.21896	8.24487	7.90002	8.22658	8.50741	8.19318	8.03753	7.78962	8.14548	8.1428	8.04012	7.99387	8.24185	8.39578	7.7278	8.14669	8.48463	8.39112	8.36942	7.98324	8.04977	8.3616	7.84527	8.68002	8.6682	8.23697	7.5021	7.93521	7.70804	5.32877	8.04597	8.11179	8.34893	8.00911	8.42817	8.04055	8.12566	8.1919	8.19467	7.92226	7.90922	8.56975	8.25765	6.80361	7.00547
C11orf65	0.628338	0.0082113	0.0213445	5.56147	4.93313	5.14812	5.97603	6.81622	4.74561	5.91021	6.23946	4.37433	5.79455	5.87543	5.27558	5.23924	4.84749	5.35605	5.00921	5.27107	4.78037	6.53569	6.42571	5.16925	6.41684	6.59508	6.4844	6.74263	6.17081	5.83073	6.373	5.67233	4.47991	5.49958	6.17867	5.98781	4.92871	5.63398	5.75212	5.08768	6.6734	5.15707	4.82018	4.83786	5.10524	6.13075	4.70113	3.91101	5.46207
C11orf83	1.36187	6.04562e-07	5.26204e-06	9.59913	8.23726	9.84388	9.44239	8.5512	10.6929	9.01463	9.38281	9.31101	9.89758	9.33378	10.3353	9.36497	8.91941	8.6677	8.2116	9.2663	8.87768	8.98409	8.93286	9.23165	10.0993	8.76769	9.4486	9.85092	9.35428	9.67284	10.2888	10.3168	10.4765	10.9793	9.1006	8.45893	9.7489	9.04397	7.53422	9.16735	9.70327	9.50504	9.16006	9.81487	9.81382	9.02618	8.95292	9.62853	9.93693
C11orf85	0.717659	0.00269076	0.00839137	7.70145	6.98379	7.11428	8.01241	8.57744	6.67714	8.14795	8.39695	7.3016	8.08682	8.17034	6.60147	7.88349	7.83656	8.07344	7.61249	8.12342	7.25058	8.5941	8.10889	7.09501	8.08481	8.48852	8.34956	8.80996	8.39406	7.77449	9.44513	7.7135	8.60411	7.74362	8.07319	7.90415	6.50849	7.50572	8.51958	7.87234	8.97784	7.79484	7.45246	7.99833	7.86178	8.12862	7.89764	6.66315	6.69147
C12orf45	1.12202	0.0204019	0.0445799	9.74745	8.62544	9.69289	10.3893	10.9679	8.46034	10.2295	10.376	9.05189	10.172	10.9202	8.62284	10.4034	10.7167	10.2865	9.71807	10.513	9.69063	11.1243	10.6418	9.7326	10.6748	11.3337	10.7821	11.0113	10.6644	10.3917	9.95032	10.0987	9.24425	6.2613	10.5486	10.2661	8.39136	10.4408	11.1035	10.6767	11.0212	10.2906	10.6758	10.7875	10.7485	11.0876	10.8067	8.18927	8.20805
C12orf56	1.88972	7.19542e-10	1.15531e-08	7.21756	5.32784	5.48698	7.66188	5.94109	7.58075	7.0035	8.17917	5.75635	6.8955	6.76923	7.23342	7.70906	8.00046	6.86371	6.97798	7.95454	7.1177	6.76705	6.79728	8.16785	6.22896	8.67166	6.29991	7.10885	7.20961	7.62983	7.48153	6.08888	6.62085	6.39334	7.68465	6.8852	6.18828	7.80296	6.59709	6.91734	7.08047	6.96844	6.81175	7.99018	7.48298	8.22894	6.75768	8.318	6.24836
C12orf61	0.591718	0.00496501	0.0140246	5.14994	4.55823	4.91849	3.88294	4.94713	4.25844	5.14954	5.05992	4.93595	4.80186	4.94012	5.1234	5.97603	4.7609	3.91861	4.66723	5.05213	4.73963	4.86447	4.83349	4.95973	5.07829	5.65351	5.37251	4.83872	5.19667	4.81624	5.70275	5.29385	5.28902	6.38163	5.66887	4.99392	4.70199	4.89723	4.72637	4.98886	5.42892	4.81672	4.69662	5.46256	4.97503	4.97625	5.29423	4.63695	6.6397
C12orf73	0.656285	2.15753e-06	1.65098e-05	8.7555	8.09922	9.11573	8.36562	8.61327	9.57583	8.81164	8.99095	8.15762	9.19845	8.94691	9.16098	8.87072	8.44964	8.72139	8.56488	8.53465	9.20406	8.96129	8.94158	8.92025	8.43536	8.24612	8.7247	8.68286	8.41752	8.82024	8.33504	9.68455	8.55452	9.2951	8.1843	8.52969	8.97632	8.78593	8.21619	9.03565	8.44157	8.65143	8.71653	8.91029	8.5029	8.56953	8.80005	8.46995	8.63892
C12orf80	0.954735	8.61418e-05	0.000440037	7.90601	6.95127	8.00246	7.94772	8.6643	7.82451	8.02005	8.27136	7.39723	7.98144	8.2383	7.57958	7.80899	8.04693	8.12972	7.66823	8.01641	7.63172	8.64742	8.59811	7.61386	7.93155	8.5885	8.50082	8.86813	8.47845	8.09058	7.8237	8.09335	7.37738	6.37533	7.99854	8.32651	7.46425	8.08907	8.67927	8.20453	8.78515	7.5804	8.46898	8.17894	7.82142	8.46362	8.42883	7.8241	7.17761
C14orf105	1.15451	1.37914e-10	2.54597e-09	7.27834	6.12383	7.53061	7.27457	7.54739	7.64539	7.2377	7.20458	7.64743	7.43786	7.3514	7.54759	7.36322	7.34338	7.30607	7.69804	7.10919	7.39312	7.5397	7.68581	7.58386	7.26039	7.41657	7.58491	7.4035	7.49463	7.23615	7.50671	7.48756	7.51815	6.66546	7.69573	7.69906	7.84923	7.51916	7.81662	7.59411	7.60538	7.31608	7.54611	7.59599	7.65328	7.6746	7.54462	6.42552	6.67814
C14orf180	0.653432	0.00119883	0.00422945	8.00641	7.35297	8.20964	8.06169	8.27702	8.06965	8.4984	8.1692	7.83343	8.49144	8.25266	7.76292	8.14142	8.23316	8.24681	7.75072	8.19656	7.85411	8.51799	8.41803	8.01379	8.34492	8.27723	8.25266	8.39385	8.4984	8.30932	7.77691	7.97663	7.38723	7.68344	8.15525	8.98336	7.87116	8.12798	8.34774	8.31533	8.5421	8.27302	8.43774	8.33975	8.2521	8.56178	8.46336	7.21867	7.30939
C14orf23	1.04058	0.000206317	0.000934391	7.3612	6.32061	7.48958	7.4834	8.46083	6.59997	7.79974	8.02851	7.27734	7.86328	8.0126	6.59469	7.30231	7.49519	7.66633	7.41859	7.71572	7.14573	8.05915	7.99814	7.74786	7.59978	8.1767	8.11278	8.13746	7.84256	7.8305	7.0506	7.35539	7.18227	5.54656	7.89985	7.87401	6.17935	7.55139	8.64641	7.70751	8.68783	7.06298	7.86647	7.9693	7.55254	8.38329	8.10032	6.30781	6.81622
C15orf43	0.612601	0.00054729	0.00217245	4.26874	3.65614	4.44893	4.28884	4.59695	4.69272	4.9154	4.6169	4.27713	4.15248	4.29158	4.8101	4.95861	4.94957	4.22029	4.39085	4.331	4.86759	4.61351	4.44893	4.63311	4.2043	4.05791	3.99984	4.19425	4.03376	4.28345	4.27433	4.40529	4.1472	5.87063	4.20593	3.90422	3.87499	3.71507	4.27813	4.14069	3.96218	4.67329	4.55991	4.32989	4.15031	4.9248	4.79983	4.21058	4.05638
C15orf48	1.47013	0.00232947	0.00744181	8.24782	6.77769	8.95603	10.9474	8.25865	6.64107	8.32116	9.00073	11.2304	6.81396	7.25286	7.60741	6.28682	7.96952	5.52841	9.08612	8.16161	6.44759	6.96708	7.53838	7.57995	9.08379	6.64327	8.27564	8.18314	5.40263	10.8579	7.25426	7.15555	8.95799	8.25805	9.73454	8.77965	9.28776	6.92759	6.61797	6.71515	9.11628	7.34864	7.8522	6.72685	10.0999	6.42677	7.96391	8.43916	9.58102
C16orf3	0.956681	0.0089867	0.0229277	7.75254	6.79586	7.496	8.11798	8.86676	7.04428	8.23384	8.26607	7.66789	8.40579	8.41085	6.73241	8.00974	8.13876	8.40925	7.45503	8.20429	7.48324	8.86701	8.31416	7.53992	8.44134	8.49586	8.30263	8.725	8.55998	8.31371	7.82168	8.22196	7.44941	6.04819	8.53727	8.38458	6.54343	7.99367	8.52792	8.31232	9.21466	8.2968	8.68961	8.73245	8.47612	8.96838	8.77248	6.23026	6.31767
C16orf45	3.18446	1.23599e-22	2.45908e-20	10.7783	7.59381	10.4249	10.8253	11.1511	9.97317	10.8538	10.9643	10.5492	10.9924	11.0829	10.2906	10.8067	11.0228	11.0639	10.5665	10.9202	10.651	11.2113	11.1785	10.6724	11.0475	11.3678	11.2395	11.4656	11.2749	11.0803	10.5191	10.7577	10.2573	10.468	11.1444	11.3193	9.81092	11.2861	11.5284	11.4276	11.8783	11.2343	11.4426	11.6695	11.6041	11.6154	11.6805	9.88161	10.429
C16orf59	0.851042	1.81533e-07	1.76144e-06	7.54604	6.69499	7.55334	7.80318	7.55353	7.25384	7.29335	7.1659	7.04483	7.56764	7.6563	8.29813	7.21543	7.33221	6.94063	7.41335	7.41948	7.90304	7.36586	7.1635	7.72564	7.43232	6.95789	7.46065	8.17654	7.19012	7.51975	7.44902	8.30904	7.49482	8.06847	7.43984	7.14146	6.98913	7.69658	6.73909	7.59178	7.43568	6.95256	7.29205	6.84012	7.15436	7.03174	7.14593	8.14773	7.93842
C16orf70	1.89832	6.10117e-09	8.07841e-08	9.21298	7.31466	8.89069	9.52897	10.0792	7.89127	9.7312	9.80128	9.15662	9.61496	9.83904	8.69743	9.60151	9.60953	9.70475	9.0788	9.59856	9.41688	9.95632	9.83415	9.4355	10.1062	10.537	10.0779	10.3804	10.4509	10.4334	9.64934	9.56333	8.90123	9.28586	10.2495	10.2217	7.57976	9.44556	9.79278	9.45874	9.99573	9.08439	9.54477	9.22339	9.44313	9.49958	9.64215	7.78925	8.63913
C16orf93	0.600518	0.0035419	0.0105781	7.78406	7.18354	7.48847	7.63769	8.07071	8.75899	7.63797	7.73293	7.65669	8.04977	8.00728	7.62739	7.78239	7.87194	7.96652	7.64043	7.71788	7.63427	7.85989	8.40043	7.81221	7.57444	8.16863	8.19656	7.94144	8.45917	7.88482	7.89068	7.9729	7.94922	7.3933	8.28764	8.43981	8.3245	8.31371	8.55255	8.37235	8.21265	8.28187	8.20685	7.78832	8.25823	8.78985	8.40208	6.64692	7.19803
C17orf47	0.593128	0.0204507	0.0446695	8.44954	7.85641	9.0689	8.46185	8.71042	9.00497	8.67237	8.82385	8.65726	8.48231	9.02311	8.74144	8.6691	8.72081	8.58095	8.54858	8.68216	8.70889	8.79912	9.15907	8.57621	8.55696	8.784	8.63171	8.58809	8.551	8.7788	8.38793	8.69278	8.30399	4.15536	8.5913	8.6509	8.96963	8.84816	9.16634	9.03871	9.14218	8.85592	8.8823	8.58687	8.76543	9.04633	9.15866	7.80823	7.79292
C17orf96	0.958329	0.00248339	0.00784847	8.51718	7.55885	7.73929	8.50198	9.17705	7.39703	8.465	9.02187	8.11239	8.06522	8.38838	8.71408	9.01913	8.79734	8.68002	8.84976	8.6067	8.5807	9.27667	9.18694	8.2202	8.84315	9.46138	9.86119	9.22255	8.77021	8.87381	8.84687	8.76348	8.76159	5.8457	9.32231	9.36224	6.86847	8.81074	9.44136	9.04301	9.44092	8.27429	8.43405	9.16136	8.74865	9.28917	9.39805	6.99092	8.37912
C18orf54	0.750995	4.57335e-06	3.22658e-05	7.40159	6.65059	7.22512	7.67773	7.97238	6.40829	7.48781	7.60077	6.99054	7.98818	7.81746	6.97648	7.56377	7.68946	7.37982	7.45109	7.37195	7.80057	7.69721	7.53675	7.21638	7.59472	7.63353	7.59142	7.62894	7.60804	7.68665	7.3016	7.30324	7.29127	6.67836	7.31834	7.32171	6.1885	7.87706	7.92599	7.9691	7.9451	7.74085	7.88581	7.84943	7.69399	8.20964	8.10341	6.7941	7.23419
C19orf26	0.789378	0.00247948	0.00784113	8.19583	7.40645	8.11672	8.39112	8.72528	7.67276	8.46972	8.48483	7.92659	8.58783	8.55031	7.58285	8.32426	8.45585	8.5936	8.18826	8.41294	8.21846	8.40208	8.8284	8.11431	8.59264	8.68933	8.91994	8.67874	8.62021	8.60011	8.21658	8.35271	7.87835	8.86701	8.58281	8.57508	7.25752	8.50059	8.82135	8.64977	9.18536	8.46737	8.97817	8.58018	8.7395	8.79761	9.09284	7.17246	7.63728
C19orf60	0.688626	2.73347e-06	2.03919e-05	9.35903	8.6704	9.6631	9.45175	9.34848	9.62466	9.59169	9.32109	9.07106	9.52477	9.72671	8.92374	9.44676	9.8332	9.45264	9.25038	9.50752	9.31662	9.34373	10.0664	9.28075	9.39123	9.55429	9.60777	9.57152	9.47772	9.43939	9.14494	9.19174	8.77598	8.86758	9.48542	9.27783	9.15866	9.42655	9.54918	9.93908	9.96551	9.56493	9.39284	9.57833	9.8707	9.66397	9.28586	9.03204	10.0163
C19orf82	1.13721	1.43115e-05	9.00073e-05	7.96151	6.82431	7.86973	7.57088	8.07751	8.27996	7.68171	8.13303	8.16863	7.81726	8.86372	7.68716	7.91236	7.82496	7.30568	8.092	7.85077	8.4423	8.24963	8.43079	7.68465	7.70124	9.00141	8.86481	7.95076	8.25399	7.99106	7.86008	7.71435	8.11938	7.53267	8.19088	9.06919	9.06396	8.63649	9.53613	8.62476	8.04932	7.96952	9.3635	7.83483	8.12907	8.87409	9.94257	7.22305	7.11484
C1orf100	0.671132	0.0430673	0.0812484	7.1	6.42887	6.8696	7.25058	7.89721	6.40149	7.59411	7.38309	6.88009	8.02108	7.3253	6.56919	7.10348	7.67812	7.5213	6.83216	7.27053	6.65617	7.62759	8.11798	7.11522	9.10125	7.75519	7.74742	7.88349	7.24394	7.63923	6.97648	7.27114	6.77244	6.42131	7.10545	7.5804	6.90016	7.70014	8.42397	7.60448	8.44621	7.51856	8.02569	7.59679	7.64023	8.94198	8.08624	5.75635	5.62677
C1orf106	2.44436	3.31913e-14	1.22487e-12	9.44836	7.004	9.45829	9.59131	8.9392	10.0843	10.1198	9.05483	9.92343	9.05583	10.4862	9.17584	10.5191	10.2146	9.7578	9.36393	8.18927	10.7064	8.9592	8.7442	9.89091	9.70106	9.36104	8.65386	8.90357	9.66206	9.03116	9.15095	8.40135	9.79666	10.0856	10.0987	7.76426	9.89091	9.84772	7.21193	8.77296	8.8043	9.97416	8.96098	7.11384	9.97416	9.28168	9.17013	10.2106	9.53055
C1orf116	0.799203	6.60127e-05	0.000348816	7.843	7.04379	7.59619	7.97863	8.24251	7.1579	8.03102	7.59199	9.37883	7.93738	8.01463	7.1969	7.51776	8.11615	8.15932	7.58223	7.86262	7.49042	7.59108	7.48979	7.49987	8.74805	8.40068	7.38391	7.81327	8.12097	7.71238	7.89801	7.45464	7.70845	8.43338	7.89402	7.82012	9.13871	7.87194	8.11368	7.75671	7.9014	7.75808	7.86143	7.77221	8.50484	8.01348	7.87341	8.43265	7.21554
C1orf158	0.633944	0.00097061	0.00353398	7.0445	6.41056	7.1891	6.4861	7.70145	7.1699	7.05819	7.03329	7.28938	7.0077	7.31995	6.9198	7.0812	7.41176	7.33397	6.76542	7.3189	6.74651	7.70511	7.54569	7.12502	7.08804	7.38616	7.10251	7.7905	7.26674	7.30518	6.74688	7.02732	6.95072	6.4104	7.31589	7.3504	7.17949	7.91974	8.12757	7.57266	7.2669	6.90883	7.47932	7.09485	6.50525	8.10632	7.58223	6.16543	6.282
C1orf159	0.991533	0.00903132	0.0230265	8.78264	7.79111	8.25512	8.99851	9.68314	7.12167	8.91966	9.29322	8.63116	9.08901	9.61341	7.84923	9.08439	9.06754	9.24324	8.68858	8.87641	8.66939	9.31446	9.72119	8.56375	9.28854	9.72164	9.86768	9.30151	9.37584	9.41388	8.86884	8.89069	8.56537	7.34338	9.16006	9.39041	7.20245	9.55667	10.363	10.1529	10.3507	9.31624	9.62853	9.58956	9.70639	9.72717	10.3098	7.22878	8.02872
C1orf186	1.61332	1.51311e-08	1.84404e-07	10.4028	8.78952	10.4671	10.7942	10.5492	10.3468	10.4045	10.3403	10.7771	10.1715	10.7752	10.3191	10.1727	10.7156	10.216	10.3786	10.4671	10.4	10.5999	10.5492	10.4556	11.0086	10.8231	11.1195	10.9021	10.8264	10.732	10.429	10.8169	9.36393	10.6377	10.4028	10.327	9.76668	10.7055	10.8927	10.9679	10.8962	10.732	10.6618	11.326	11.3081	10.8326	10.8985	9.92017	10.3248
C1orf192	0.77863	0.0126285	0.0303	7.59261	6.81398	8.32724	8.17592	7.44884	9.59624	6.91818	6.83276	7.2408	7.03934	6.78706	7.04351	8.1925	7.42853	9.87972	8.54888	8.88463	7.16736	7.59859	7.3044	8.48686	6.87706	7.41609	7.01374	7.86239	9.10158	7.21154	6.97506	8.01818	6.76477	4.30738	6.71745	8.12623	7.39882	7.91457	7.0458	7.29571	7.20186	7.65767	7.17304	9.6042	7.1	7.5956	8.04994	6.81017	6.8336
C1orf200	0.96909	0.00190731	0.00629807	11.0574	10.0884	10.7885	11.1478	11.3097	10.4176	11.123	11.47	10.9667	11.1136	11.7444	10.6387	11.249	11.4635	11.3894	10.9679	11.3832	10.954	11.6096	11.7302	10.9146	10.8655	11.9281	11.9747	11.7027	11.4405	11.5535	11.0729	11.1616	10.7473	9.13251	11.6267	11.7525	10.1553	11.7087	12.2081	11.9422	12.0682	11.3158	11.7762	11.769	11.5629	11.7481	12.2265	10.2652	10.6627
C1orf210	0.742588	0.000494562	0.00198554	7.10659	6.364	6.82636	7.88526	7.40297	6.99238	7.09086	7.05718	7.3388	7.19929	7.58842	6.60503	7.58938	7.56996	6.89151	7.1023	6.7444	6.48502	7.16084	8.26688	7.12209	7.0628	8.26486	7.2375	6.91611	6.45474	7.04959	6.51043	7.40453	6.69837	6.985	8.01441	7.02218	6.42108	6.92519	7.81052	7.06028	7.61781	8.27655	6.93815	6.78504	6.7214	7.61037	8.42583	7.06167	6.59726
C1orf94	0.854501	0.00370508	0.0109809	7.05546	6.20095	6.42321	7.62332	8.62049	6.67497	7.43491	7.61985	6.83517	7.71086	7.93689	5.5502	7.12636	7.40074	7.01437	6.69657	7.22455	6.99985	8.10032	7.80522	7.11636	7.59748	8.40914	8.06063	8.03736	7.65363	7.75651	6.62435	6.49321	7.38006	6.2501	7.72818	7.05271	6.45751	7.37903	8.38188	7.64706	8.14424	7.07175	7.51955	7.69089	6.7887	8.45347	7.89281	5.70142	6.09893
C1orf95	0.720873	0.00320772	0.0097299	8.43085	7.70998	8.24826	8.63868	8.99885	7.53497	8.92823	8.71597	8.35472	8.60112	8.72139	7.97462	8.64326	8.58832	8.59718	8.30315	8.50966	8.5393	8.68607	9.12314	8.70572	8.70517	9.12482	8.95493	8.82115	8.79223	8.96638	8.31641	8.76121	8.10648	7.04724	9.19677	9.0633	7.90396	8.87044	9.46068	9.1694	9.16863	8.5531	9.06507	8.66547	8.85857	8.6803	9.40554	7.36312	8.06723
C1QTNF5	0.773899	0.000179069	0.000825531	8.76165	7.98775	8.10341	8.55768	8.94809	8.47381	8.5913	9.09456	8.6622	8.69431	8.83915	8.09359	8.67536	8.9338	9.1063	8.44327	9.22671	8.37864	8.95945	9.14698	8.6101	8.90328	9.17705	8.98951	9.12903	9.1866	8.97291	8.70765	8.61134	8.51138	7.54611	8.98165	9.10346	8.00462	9.04455	9.56538	9.22255	9.90675	9.22402	9.85626	9.10597	9.58387	9.59296	9.41017	7.83574	8.25512
C1QTNF9B-AS1	1.54877	6.35244e-06	4.32314e-05	8.17317	6.6244	7.95513	7.69573	8.11137	8.60259	8.04095	8.37864	9.06298	8.24401	9.66812	8.62975	7.66942	7.96724	8.0081	7.5813	7.85411	7.87596	8.41592	8.38034	7.99526	7.81905	10.0843	9.40705	8.05039	7.90534	8.22242	7.56177	7.74965	7.31956	8.62688	8.14484	7.83166	9.06507	9.03943	9.49276	10.514	8.35984	8.3965	9.60823	8.16461	8.80127	8.81789	11.0816	7.39609	7.10348
C20orf195	0.75588	0.00100398	0.00363685	7.66417	6.90829	7.95783	7.73486	8.29646	7.15258	8.26999	7.6919	7.72276	7.9729	7.7006	7.25787	8.00091	7.84846	8.14589	7.77284	7.8518	7.09892	8.18652	8.22765	7.61056	8.1014	8.22384	7.66968	7.7942	7.64935	7.82554	7.79544	7.30264	7.4725	5.31315	8.12161	7.90219	8.20453	7.52827	7.96521	8.01184	7.98046	8.0967	7.96461	7.23174	7.61781	8.25555	8.01184	6.46776	7.38185
C20orf203	1.47615	4.03172e-06	2.88088e-05	8.62974	7.1536	8.63892	8.71726	9.38812	8.49712	8.96349	9.11189	8.52145	8.98068	9.23514	8.49586	8.89733	9.07048	8.86701	8.40357	8.99942	8.42198	9.59671	9.36271	8.18878	9.01435	9.44353	8.97386	9.40705	9.16203	8.94141	8.35539	8.98308	8.17481	6.42677	8.88309	8.90831	8.19538	8.85312	9.68263	9.67236	10.063	8.55669	9.16905	9.45829	9.27035	9.76358	9.58345	7.66169	7.71201
C20orf24	0.721125	0.000251568	0.00111096	11.0381	10.317	11.1213	11.3138	10.5711	11.1763	11.5258	11.3158	11.19	11.0503	11.1358	11.3437	11.1633	10.8289	10.4899	11.2602	10.8147	10.8489	10.6308	10.7449	11.0169	10.8669	10.4446	10.4899	10.8524	9.89413	10.8927	11.0169	11.4468	10.7267	11.3238	11.3832	10.5191	11.4449	10.6778	10.1056	10.216	10.1192	10.8764	10.164	10.8787	10.701	10.2343	10.2856	11.6267	11.7762
C20orf27	1.13611	0.000205359	0.0009304	8.55561	7.4195	9.36734	8.09314	8.95031	9.46805	8.169	8.63675	7.46386	9.05023	8.47015	9.88585	8.00208	9.09615	8.68783	8.19918	8.0683	9.10473	8.19697	7.66047	7.91414	8.79827	7.77238	8.5029	8.53902	8.18137	8.09394	7.63923	9.8033	9.38169	5.65001	8.45347	7.41757	8.88159	8.59429	8.08045	8.30726	7.12117	8.22614	7.78574	7.58578	8.11751	7.58793	7.44634	10.2066	9.28661
C20orf57	0.960516	0.00160019	0.00541283	9.20478	8.24426	9.8915	9.1882	10.0409	10.0397	9.53095	9.37802	9.38395	9.66763	9.81092	9.28854	9.55429	9.83524	9.50237	8.8292	9.79033	9.23375	9.81238	10.4057	9.42496	9.76852	9.59719	9.39956	10.076	9.6587	9.38578	8.84864	8.8503	8.98563	7.92719	9.38281	9.21466	9.84072	9.54918	9.79882	9.80285	9.94199	9.94374	9.85911	9.67236	9.79563	10.0051	9.69724	8.07751	8.23937
C20orf62	1.06665	0.00803586	0.0209575	9.28717	8.22052	8.98592	9.8281	10.3747	7.92719	9.76307	9.95135	9.15804	9.66561	10.0371	8.47402	9.73407	9.81825	9.92842	9.24568	9.70899	9.2439	10.3074	9.93294	9.30183	9.95632	10.4757	9.88879	10.1997	10.1411	9.99636	9.39377	9.67284	8.82054	7.54868	9.74148	10.1383	7.48699	9.84238	10.4238	10.0932	10.7286	9.68981	10.3285	10.0216	10.1915	10.3967	10.5339	8.02005	8.33829
C21orf119	0.970662	1.09321e-06	8.98117e-06	8.61932	7.64866	8.83329	8.68335	8.67898	9.21722	8.42221	8.67141	8.16282	8.91151	8.82054	8.08663	8.94015	8.58142	8.5807	8.49607	8.77368	8.29074	8.86481	8.96871	8.52384	8.57744	8.8448	8.8003	8.81554	8.77248	8.59494	8.05418	8.66666	8.19875	8.64373	8.27429	8.17481	8.98625	9.01759	8.91059	8.84763	9.48382	8.94926	8.93456	9.05519	9.22339	9.15165	9.00171	7.88349	8.25098
C21orf128	0.836319	1.29973e-06	1.05118e-05	6.39641	5.56009	6.51591	6.55116	6.74566	6.49143	6.46276	6.79447	6.51409	6.42817	6.80269	6.40116	6.36259	6.42492	6.6112	6.57263	6.48007	6.33549	6.69087	6.26544	6.23572	6.3408	6.68862	7.64636	7.51836	6.40361	6.34606	6.43723	6.21948	6.51772	6.24075	6.45536	6.35766	6.06115	6.05327	5.8349	5.83518	6.54142	6.31193	8.37175	5.93236	6.53817	6.49382	6.96073	5.7237	5.82691
C21orf15	0.824856	3.96399e-12	9.74181e-11	7.24472	6.41987	7.51448	7.04865	7.67946	7.15141	7.40512	7.50365	7.2454	7.33109	7.47387	6.93545	7.08455	7.26361	7.29874	7.44797	7.1891	7.11244	7.35826	7.41426	7.06049	7.05975	7.3504	7.31216	6.94596	7.08666	7.22125	7.19123	7.27039	7.29398	5.68737	7.42411	7.22512	7.49502	7.40636	7.68107	7.50021	7.66942	7.02769	7.13312	7.30863	7.3724	7.4675	7.1688	7.34939	7.20519
C21orf58	0.594277	0.00237412	0.00755597	7.88964	7.29536	7.76563	8.06637	8.51781	7.26805	7.91614	7.97597	7.55471	8.21399	8.15053	7.45522	8.00568	8.01441	8.24826	7.71788	8.05553	7.76447	8.3842	8.2498	7.797	8.25331	8.21027	7.98182	8.35115	8.40579	8.15698	7.7679	7.79311	7.54776	7.71572	7.80254	8.07954	6.90752	8.3205	8.44279	8.24504	8.88825	8.14589	8.27564	8.61181	8.61882	8.46714	8.27476	7.21806	7.4109
C22orf23	0.951869	0.000124703	0.00060398	8.54936	7.59749	7.92204	8.56885	9.00369	7.19304	8.77698	8.89586	8.20284	8.55669	8.55819	7.63769	8.70659	8.71329	8.9338	8.5512	8.42169	8.36562	9.17013	8.56078	8.1358	9.02865	8.80725	8.75715	8.85972	9.05454	8.80887	8.88216	8.78929	8.49712	7.07307	8.8645	9.68362	7.15475	8.91383	9.0537	8.98951	9.30296	8.76575	8.88186	9.22844	8.99217	9.24938	8.85422	8.04238	8.75175
C2CD4C	1.31337	0.00240519	0.0076421	9.9394	8.62603	9.40912	10.4539	10.9629	8.95831	10.658	10.4828	9.55617	10.2175	11.0416	8.75199	10.709	10.7716	10.546	9.80389	10.5105	10.0051	11.258	10.5202	10.0768	10.8776	11.3097	10.7064	11.0829	10.6559	10.7632	9.74534	9.86178	9.44174	6.90519	10.5771	10.4211	8.52362	10.5286	11.2249	10.7461	11.0448	10.3893	11.2288	10.9311	10.8111	11.1763	11.2324	8.55378	9.47988
C2orf16	0.626564	0.0235602	0.0501308	8.97663	8.35006	8.55925	9.10818	9.5487	8.33193	9.28046	9.40744	8.84285	9.32681	9.6368	8.91552	9.25759	9.49588	9.25182	8.6141	9.18563	8.89877	9.49788	9.63767	8.98797	9.35892	9.64	9.78527	9.38999	9.57794	9.3323	8.87293	9.10952	8.62772	7.78679	9.44676	9.70009	8.98535	9.26587	9.81825	9.75218	10.0367	9.42832	9.4992	9.74487	9.96496	9.66763	9.95991	7.83184	8.10054
C2orf88	1.25317	6.37441e-06	4.33551e-05	9.20352	7.95035	10.327	9.10301	9.05272	10.3737	9.58956	9.59624	9.77827	9.54358	9.55385	8.95768	9.31288	10.5035	8.85536	9.29716	10.4774	8.58809	9.03871	10.7309	10.8231	9.37395	9.26266	9.12629	9.21145	8.85564	10.007	8.61181	8.75005	8.26202	9.56294	9.17335	8.42772	10.3828	9.28423	8.51572	9.86481	9.14392	9.60067	8.77646	9.84122	9.29423	9.28423	8.57554	8.25246	9.56163
C3orf27	0.628702	0.0340359	0.0673768	7.49329	6.86458	6.9983	7.37256	8.14692	6.38619	7.78528	7.89965	7.18379	7.49229	7.98527	6.28407	7.48979	7.17131	7.81569	7.38585	7.56454	6.95409	7.6076	7.95704	7.11595	7.4388	8.17848	8.01944	7.69089	8.24004	8.43286	7.96848	7.68465	7.34285	3.38971	8.46898	8.78039	6.73588	8.11326	8.49586	7.86101	8.75341	7.72523	8.03587	8.08538	8.06232	8.48463	8.61466	6.98553	7.7022
C3orf33	0.831773	0.00325707	0.00985215	5.38455	4.55278	5.65325	5.98733	5.13852	6.86126	5.19427	5.38541	4.41081	6.03141	5.15061	5.59965	5.96491	5.33364	5.8954	5.29891	4.80186	5.94301	5.82038	4.70113	6.48007	5.25818	5.06647	5.05636	5.4128	5.21752	4.56961	5.18284	6.25699	6.72441	7.18157	4.69823	3.9713	4.1292	5.44648	5.39178	4.96349	4.11285	4.90365	5.48762	4.88732	3.84057	2.93194	4.34682	5.58244	6.43762
C3orf55	0.973426	1.5662e-05	9.77755e-05	7.00772	6.0343	6.85781	8.69849	7.60467	7.09295	7.24649	7.22305	7.07153	7.06723	7.71811	6.75668	6.60719	7.41035	6.73964	6.8605	7.5211	6.31576	7.27751	7.4747	6.63008	7.81569	7.31834	7.10811	7.34786	7.05293	7.18928	6.55471	6.97171	6.87836	8.12694	7.14481	6.55764	7.69508	7.12042	7.36521	7.05331	7.42082	6.65316	7.51509	6.41595	7.41505	7.54511	7.10619	6.03849	6.40472
C3orf67	0.782591	0.00711201	0.0189037	6.62069	5.8381	6.54862	6.34242	5.51066	7.61422	7.32436	6.76098	6.13987	6.80865	5.8672	7.86556	7.79799	6.04683	7.01551	7.04978	6.75136	6.22074	5.94906	5.4677	5.88738	6.1389	6.06806	5.55106	5.19625	7.03843	6.48133	7.43046	7.19102	7.02085	6.04925	5.71872	6.10142	7.07041	7.03309	4.6997	6.90372	4.92995	6.07931	5.34142	7.5004	6.32901	6.17021	5.91439	6.83818	8.66282
C4orf26	0.960313	0.00349507	0.0104628	7.50491	6.5446	7.95887	8.21677	8.53542	8.05693	7.96891	7.96294	7.10772	8.06199	7.88393	7.47776	7.75808	7.82087	7.42411	7.30377	7.81761	7.25808	8.24297	8.29271	7.85348	8.26024	8.32221	7.3884	8.39839	8.19515	8.03867	8.15762	8.05821	6.72007	5.30381	7.53924	7.89568	7.60195	8.03715	8.20891	8.07495	8.52532	7.95353	8.06723	7.3392	8.23274	8.51799	8.2781	6.06258	6.51796
C5orf22	0.622262	0.00414298	0.0120615	8.53067	7.90841	9.06017	8.39737	7.71572	8.74334	8.48575	8.47813	8.78954	8.09873	8.3016	9.60194	8.50696	8.31714	8.06315	9.9135	8.2519	8.75634	8.05857	7.44343	9.17157	8.09435	7.83128	8.30726	8.05487	7.67276	8.61824	9.31662	8.49898	9.46805	9.0633	8.33606	7.85306	8.99942	8.29662	7.48216	7.85326	7.66617	8.31089	7.7845	7.58056	7.98898	7.94794	7.99307	8.7431	9.2921
C5orf24	1.30955	6.82208e-14	2.36858e-12	9.7198	8.41025	9.50364	9.82754	9.981	9.22339	9.8521	9.82568	9.83464	9.62329	10.0033	9.74438	9.93693	9.9249	10.1491	9.72268	10.0548	9.70639	10.18	9.97416	9.72967	10.0169	10.4057	10.2459	10.1062	10.3976	10.1505	9.54358	9.59212	9.62998	8.92823	10.0715	10.2573	9.70254	9.61735	9.87498	9.86598	9.77711	9.21014	9.55667	9.42691	9.34186	9.79987	9.8396	9.50924	9.32954
C5orf34	1.47197	3.23463e-06	2.36599e-05	7.04601	5.57405	6.1667	7.56274	6.48173	6.62396	8.42488	6.94396	6.34963	6.99607	7.53512	7.81826	6.77774	6.47642	5.79898	7.33452	6.73403	7.70373	6.34457	6.21778	6.59209	7.12153	5.50776	6.8605	7.64149	5.91373	7.68625	7.73503	6.29314	6.86242	6.83613	6.81291	7.0214	5.89495	6.97078	5.55601	7.26597	5.64322	6.47486	6.70457	6.36785	7.38391	5.96559	6.67758	7.51589	7.77035
C6	1.33695	3.2057e-05	0.000184752	9.15531	7.81836	9.08771	9.2594	9.74934	8.82519	9.45375	9.42124	9.07082	9.1719	9.64412	8.82083	9.45696	9.49185	9.56648	9.41057	9.47613	9.01405	9.76261	9.70979	9.00171	9.4734	9.86178	10.377	9.52777	9.56648	9.37615	9.40636	9.55534	8.45237	7.84782	9.80128	10.2119	8.62021	9.40705	10.0893	9.71252	10.2582	9.4095	9.46138	9.67717	10.01	9.75733	10.2589	8.06109	8.15932
C6orf123	0.61986	0.00016263	0.000760003	7.49232	6.87246	7.26288	7.85787	7.6076	7.42665	7.59199	8.23517	7.62312	7.53287	7.82985	7.38703	6.95557	7.84782	8.08148	7.71031	7.24913	7.52556	7.69442	7.45265	7.70336	7.71069	7.92204	8.10762	7.85703	7.8241	7.75458	7.66733	7.59056	7.39609	7.51975	7.68125	7.88084	7.29335	7.64683	7.79994	7.79884	7.71103	7.36057	7.53145	7.69762	7.65112	7.54717	7.56528	6.86562	6.82652
C6orf141	0.902437	0.00214855	0.00695217	7.15645	6.25402	7.53087	7.42145	7.6705	7.37481	7.68265	7.46005	7.19304	7.65517	7.52259	7.68226	7.42128	7.55043	7.22125	7.04084	7.41776	6.79843	7.67829	8.13915	7.32706	7.49289	7.62003	7.36654	7.66751	7.69129	7.54249	6.7694	7.02049	6.53917	5.16603	7.66443	7.01321	7.83595	7.68946	7.64488	8.46162	7.7986	7.51036	7.76447	7.37846	7.91705	7.88137	7.68021	5.70479	6.42031
C6orf15	0.712671	0.000485363	0.00195568	9.05472	8.34205	10.0204	8.96009	9.24425	9.73167	9.12314	8.9898	9.26077	9.20669	9.3159	9.35892	9.22099	9.61441	8.8982	8.60259	9.37584	9.02187	9.13421	10.278	9.12994	9.21502	9.16006	9.43286	9.26813	9.30775	9.06726	8.93286	9.18417	8.88243	7.59917	9.29173	9.05675	9.22526	8.89326	9.33643	9.49541	9.53893	9.77513	9.27152	9.4742	9.59423	9.59339	8.99276	8.54061	8.30035
C6orf52	0.649022	0.000739849	0.00281052	7.95169	7.30267	8.58281	7.71489	8.31951	8.43916	8.39385	7.90219	8.01076	8.19168	8.13934	7.87401	8.36319	8.17848	8.04055	8.01537	8.04781	8.04299	7.92539	8.46055	8.26627	7.8764	8.00974	8.0619	8.13667	8.06655	7.85973	7.70629	7.98546	7.42929	6.97213	8.38914	7.90326	8.40384	8.21265	8.09394	7.96294	8.40602	8.36682	7.93944	8.21243	8.35878	8.49092	8.24125	7.14371	7.59837
C7orf34	0.703646	0.00460218	0.0131624	8.22636	7.52271	8.52317	8.57143	8.99007	8.09841	8.87212	8.54981	8.3264	8.88309	8.6993	7.73989	8.50529	8.53094	8.70205	8.13303	8.54888	8.28712	8.62192	8.92701	8.63846	8.60112	8.80836	8.60696	8.63822	8.77341	8.54811	7.98201	8.48302	8.42376	5.9335	8.37511	8.60927	7.77587	8.38683	8.57099	8.7175	8.51094	8.37389	8.86727	8.26119	8.61667	8.63001	8.85143	7.14991	7.77724
C7orf57	1.50206	0.0143438	0.0335294	5.07191	3.56985	6.31082	6.60381	4.8961	7.08007	3.92316	3.88294	5.05931	2.1807	3.11109	3.63941	5.29277	5.11465	9.25838	7.34722	7.03537	2.57199	4.49496	4.5435	6.01066	2.78915	3.5491	3.61329	5.53425	8.00994	4.68556	6.65374	5.90026	3.67229	3.57234	3.28052	6.77244	3.50813	5.34024	4.32063	3.5491	3.88294	4.76782	1.99654	7.94208	2.1807	3.80833	3.59485	3.17562	4.79327
C7orf61	0.604927	0.0233581	0.049775	7.6497	7.04478	6.97704	7.90965	8.62721	6.39247	8.01904	8.08907	7.02566	7.69884	8.00848	6.98573	7.66751	8.19168	7.8518	7.34786	7.95761	7.45444	8.34519	7.6262	7.70488	8.46995	8.34871	7.67132	8.6675	8.49563	8.11917	7.73751	7.9744	7.3504	7.02988	8.14024	7.98506	6.1173	7.9959	8.37128	7.85348	8.76986	7.92309	8.36904	8.37932	8.06295	8.27971	8.47941	6.55932	6.76199
C8B	0.648685	0.00871057	0.0223829	8.7879	8.13921	9.49833	8.78954	9.21185	9.72867	8.85396	8.81968	8.71653	8.98915	9.28545	8.74291	9.10158	9.23404	8.66641	8.39604	9.18199	8.64276	9.18052	10.0371	8.9616	9.05736	9.35093	9.13559	9.15497	9.18536	8.92944	8.53704	8.63494	8.44934	6.98853	8.9484	8.81415	9.41209	9.05423	9.45829	9.3635	9.57833	9.4157	9.30812	9.1958	9.33787	9.79278	9.36063	7.8446	7.84256
C8orf4	3.89291	1.88878e-09	2.79169e-08	8.46656	4.57365	9.66719	6.5915	7.64149	8.96668	9.42124	9.15463	7.05039	7.15436	7.03971	8.25658	10.5035	8.12862	8.29928	11.6695	8.99668	11.1152	6.47161	9.02676	9.59897	7.23145	7.52556	8.12078	10.2047	4.12764	8.36301	7.98836	5.86871	11.0937	8.64348	8.28207	6.20579	8.78152	5.91021	6.77917	3.32288	8.38683	9.86178	9.52301	6.34022	8.78515	9.15532	9.41251	8.47968	10.1471
C8orf76	0.664882	0.00730693	0.0193477	9.02425	8.35937	8.71998	9.6295	9.06851	9.12353	8.44203	9.89207	8.95831	9.57583	9.53986	9.18602	8.54061	8.71972	8.09455	9.41893	8.79496	9.14914	8.97551	8.55059	9.08471	9.20534	8.64925	9.00836	9.69964	9.19845	8.65726	9.32642	9.19331	10.1887	9.62142	8.84687	8.63649	9.93908	8.15163	6.50085	6.64713	9.771	9.3497	8.93137	7.92081	7.96094	8.6509	8.45161	8.67407	9.09615
C8orf82	0.822572	0.00801795	0.0209251	8.30028	7.4777	8.50766	8.97976	8.71174	9.08082	5.7221	8.21006	8.39406	8.88985	8.02274	6.85286	6.93523	7.77431	6.76923	8.69009	7.75583	8.22522	7.22476	7.56555	7.95492	9.63278	7.90349	8.32311	8.92756	9.773	8.46737	8.7146	8.08191	8.67039	9.16424	7.71631	7.45092	9.5432	7.82691	6.98201	6.98182	8.6234	8.89905	7.76897	7.24634	8.52451	7.28056	7.50103	8.58189	8.84232
C9orf117	0.587482	0.0491723	0.0904391	10.4873	9.89981	10.178	10.714	10.8655	9.74236	10.714	10.7351	10.4184	10.7188	10.9095	9.97149	10.7415	10.7908	10.8147	10.3668	10.7032	10.4309	11.0966	10.7807	10.4899	10.9706	11.2973	10.889	11.1493	11.1002	10.9793	10.4013	10.6377	10.363	6.43607	10.8798	10.895	9.44436	11.0773	11.3138	11.1243	11.3031	10.7632	11.1818	11.1616	11.0982	11.4026	11.4586	9.84609	10.2906
C9orf156	0.852991	3.90902e-05	0.000219072	10.0309	9.17788	10.6662	10.4416	10.6952	10.6365	10.8621	10.2825	10.2016	10.5855	10.9397	10.0507	10.5249	10.8326	10.2343	9.81133	10.8027	9.97813	10.615	11.2179	10.4111	10.1086	10.2732	10.2928	10.1815	10.3557	10.0993	9.63767	10.1047	9.6816	9.59513	10.0513	10.0688	10.1021	9.90675	9.53055	9.94491	9.48128	10.284	9.70417	9.50071	9.86071	10.1715	9.46105	9.62672	9.62716
C9orf16	0.79982	2.29321e-09	3.33558e-08	8.56775	7.76793	8.83422	8.72764	8.79658	8.41592	9.26785	8.15329	8.63026	8.55998	8.58711	8.49043	8.19557	8.57479	8.6404	8.97179	8.34363	8.12566	8.21975	8.99428	8.29154	8.31951	9.1467	8.55334	8.18542	8.41061	8.63357	8.80127	8.32178	8.29204	8.46209	8.46185	8.25846	8.82493	8.18159	8.32073	8.218	8.82464	9.06396	8.18589	7.97641	8.90218	8.5105	8.11572	8.43525	8.94592
C9orf66	1.40079	1.2445e-08	1.5492e-07	7.59177	6.19098	7.61842	8.06984	8.54082	7.04334	8.04559	8.08234	7.60903	8.02727	8.12862	7.2802	8.02319	8.06678	7.93651	7.45131	7.90716	7.37216	8.26461	8.22565	7.69532	8.23342	8.09612	7.73431	8.41945	8.30076	7.9559	7.56705	7.82691	7.48827	5.87842	7.80377	7.70551	7.06221	7.81605	8.17331	8.10094	8.50269	7.68226	8.11474	8.07476	7.86647	8.0658	8.1626	6.74671	7.0812
C9orf85	2.07563	2.71712e-19	2.64544e-17	9.65566	7.58003	9.86886	9.44208	9.01282	10.0498	9.90904	9.1394	10.3082	9.74236	9.38507	10.2944	9.85042	9.6587	10.0403	9.82667	9.54918	9.88216	8.67459	9.97587	10.0779	9.76113	9.0475	9.90323	9.20406	10.0241	9.81431	10.0779	10.0038	10.0694	7.64306	9.81771	10.7875	10.4862	9.62591	8.9343	9.31773	9.00411	10.0241	9.43088	9.21014	9.60593	9.20706	9.19677	9.76813	9.46324
CA1	0.945829	0.0180843	0.0404151	9.09734	8.15151	8.91487	9.50071	10.2251	7.45418	9.53693	9.82667	9.1742	9.40636	9.78325	8.48231	9.54695	9.61772	9.54273	9.09136	9.50111	9.11753	9.90168	9.86019	9.26885	9.77766	10.33	9.87025	9.97023	10.0682	9.89471	9.43088	9.52743	8.91884	6.28967	9.64459	9.93004	7.52399	9.80536	10.2589	10.1324	10.5173	9.6816	10.0336	9.89815	9.773	10.1727	10.4393	7.43086	8.07954
CA5A	0.783001	0.0217252	0.046916	7.85199	7.06898	7.49021	8.28978	8.74912	6.35404	8.76431	8.69556	7.75158	8.19987	8.29579	7.21476	8.35705	8.10106	7.68144	7.67547	7.99146	7.46942	8.61937	8.5194	7.71886	8.92025	8.65034	8.59287	8.68729	8.62313	8.51636	9.10346	8.01133	8.00487	5.39455	9.11094	8.42098	6.33045	8.14589	8.88338	8.35206	9.01575	7.63353	8.34281	8.247	8.26383	8.54666	8.43338	6.58824	6.7887
CA7	1.8149	1.61e-07	1.58234e-06	9.02818	7.21328	9.18453	9.03204	9.83014	9.03713	9.15565	9.21977	8.94752	9.30917	9.724	8.64577	9.43384	9.54918	9.55305	8.87977	9.59131	9.22632	9.51861	9.9218	9.14723	9.29862	9.66719	9.70475	9.6111	9.61005	9.47489	9.17644	9.3441	8.59183	7.1441	9.5499	9.40305	8.9456	9.77149	10.2075	9.97203	10.7724	9.75482	9.60112	10.178	10.2238	10.3539	9.47215	7.56856	8.16632
CA8	1.0649	2.00038e-07	1.92064e-06	6.52106	5.45616	6.40999	6.95807	6.64429	6.13461	6.04545	6.03806	5.75049	6.09061	6.9987	6.28925	6.10161	6.02194	7.05641	6.71263	6.15873	7.23316	6.74781	6.68145	6.50833	7.10792	6.53817	7.24617	7.06189	6.82918	6.91856	7.04703	6.40701	5.86012	6.9889	6.43028	6.52899	6.0186	6.40578	7.20671	8.04597	6.61438	6.31557	7.01854	6.78641	6.01916	6.74162	6.79862	7.34812	5.92945
CABLES1	0.739018	0.00283624	0.00876934	9.46532	8.7263	9.19448	9.63051	10.1369	8.47487	9.71356	9.77251	9.20406	9.78225	9.78169	9.07227	9.45915	9.71148	9.45743	9.14434	9.58545	9.36808	10.2054	9.66164	9.45582	10.0191	10.3285	10.0266	10.2223	10.6356	9.98432	9.2557	9.66665	9.10028	8.67827	9.89918	9.92607	8.48575	9.65732	10.1852	10.1559	10.3945	9.52253	10.0701	9.94881	9.87341	10.2667	10.2692	8.61571	9.05272
CABLES2	0.774662	2.85005e-08	3.28841e-07	9.02871	8.25405	9.40869	8.77752	9.51271	8.46362	9.035	9.12697	8.79658	9.39757	9.30151	8.83296	9.28393	9.15006	9.14698	8.73159	9.03808	8.95229	9.28819	9.66812	8.83445	9.05216	9.32492	9.19944	9.41464	9.1698	8.79935	8.59236	8.97327	8.82983	8.78848	9.07652	9.17157	8.63212	9.20736	9.16172	9.25497	9.28278	9.35093	9.26184	9.07325	9.42616	9.81771	9.49886	8.64009	8.78985
CABYR	0.831948	0.000527724	0.00210317	8.22534	7.39339	7.82515	8.4185	8.81074	7.40074	8.52169	8.66197	8.0967	8.49119	8.218	7.99367	8.55598	8.54757	8.52076	8.29115	8.34452	8.39925	8.51366	8.2781	8.26573	8.63822	8.57099	8.56425	8.78015	8.9389	8.64955	8.23496	8.70311	8.17987	7.75583	8.77493	8.57925	7.28862	8.63596	8.77134	8.50269	9.08901	8.42921	8.59017	8.5941	8.66147	8.67482	8.28764	7.11384	8.17806
CACNA1F	1.0198	0.00719287	0.0190871	8.46466	7.44486	8.8284	8.45119	9.44556	7.19412	9.00284	8.63798	8.25355	8.54304	9.29924	8.06522	8.72197	9.28695	9.31057	8.08356	9.19814	8.08719	9.22911	9.44755	8.33525	9.05707	9.65494	9.18018	9.37732	9.46363	8.49024	8.09534	8.14094	7.45715	6.2714	9.25969	9.08183	7.30046	8.87381	9.66613	9.44239	9.724	9.28393	9.21116	9.63184	9.52897	9.78582	9.98363	7.17803	7.37783
CACNA1G-AS1	0.871248	0.00556837	0.015439	6.95784	6.08659	7.69248	7.23807	7.59189	7.55002	7.75967	7.24484	6.57036	8.04576	7.90475	7.0042	7.20323	7.4725	6.4969	5.87063	7.69379	6.26207	8.80549	8.17967	6.88863	7.22523	8.39252	6.92905	7.52157	7.275	6.4171	5.90854	6.80687	6.07009	6.25318	7.01899	6.59301	7.02273	6.86867	7.35466	7.29357	8.12483	7.44797	7.71453	7.04027	7.57407	8.52771	8.25658	5.91659	6.2769
CACNA1H	1.16732	2.68019e-09	3.83507e-08	7.8756	6.70829	7.56233	8.06542	8.05219	7.17462	7.99269	7.88984	7.72053	8.06619	8.16785	7.38992	7.94382	7.93944	8.10361	7.85843	7.99342	7.71274	7.89362	8.01709	7.94304	8.03141	8.01114	7.82012	8.092	8.20826	8.14464	7.89743	8.26941	7.81073	7.12024	8.20207	8.59741	7.06357	8.28911	8.44829	8.36812	9.73833	8.39175	8.29301	8.57259	8.6941	8.18826	7.80599	7.35237	7.73258
CACNB4	0.971352	1.08578e-16	6.3863e-15	6.89724	5.92588	6.90596	6.65359	6.66349	7.05952	6.74279	6.61139	6.85232	6.9697	6.83895	6.86603	6.73484	6.82315	6.82777	6.62904	6.80424	6.80397	6.58438	7.20746	6.57761	6.84847	7.01551	7.02489	6.89264	6.85705	6.81505	6.70631	6.78996	6.80465	6.71745	6.84607	7.06068	7.39475	7.06805	7.26742	7.01662	7.27923	6.86143	7.0922	6.71307	7.11284	7.24844	7.02846	7.08704	6.78048
CACNG3	1.15972	0.00638581	0.0173158	8.12553	6.96582	8.35493	8.56222	9.1063	7.5958	8.68132	8.92645	8.15718	8.97665	8.85143	7.85823	8.75872	8.83038	8.63092	7.9967	8.94107	8.12001	8.92944	8.99668	8.14525	8.891	9.03316	8.61797	9.05118	9.10125	9.12563	8.25912	8.53634	7.98596	6.22716	9.1464	8.58232	7.38006	8.60059	9.11321	8.97937	9.30775	8.60803	9.03023	8.97881	9.05397	9.15266	9.00858	6.19143	7.10283
CACNG6	1.00445	0.00702993	0.018729	10.1075	9.10308	9.88585	10.4344	10.4249	9.35152	10.4654	10.7121	10.0266	10.3168	10.8669	9.33347	10.5739	10.7438	10.615	10.2975	10.4852	10.1169	11.0199	10.8475	10.1673	10.7515	11.2165	10.8475	10.8873	10.7967	10.7393	10.2393	10.2685	10.0324	9.44899	10.7918	10.9269	9.31489	10.7393	11.2785	11.0376	11.3755	10.4757	10.7383	10.8776	10.7967	11.0503	11.4989	8.67459	9.04785
CADM3	0.852084	0.00854148	0.0220375	9.52107	8.66899	9.55059	10.0371	10.3175	9.05707	10.0749	9.81431	9.0922	10.0467	10.067	8.70628	9.80285	9.72359	9.88821	9.27449	9.70585	9.3371	10.1062	10.007	9.47385	10.3168	10.4101	10.0886	10.2238	10.3531	10.1295	9.36171	9.74083	9.08799	7.24601	9.89758	10.0569	8.44829	10.0297	10.4993	10.4843	10.4828	10.2525	10.2091	10.2672	10.3425	10.7188	10.6655	8.22634	9.08502
CADM3-AS1	0.645658	3.77564e-06	2.71164e-05	7.03387	6.38821	6.94252	7.00119	7.4156	6.74318	6.97963	7.25923	7.01817	6.82822	7.26999	6.8955	7.43476	7.06544	6.74607	7.06968	7.28354	6.73714	7.19824	7.03135	7.10524	6.96785	6.64937	7.67496	7.3189	6.78265	6.92651	6.66369	7.19324	7.04084	6.46679	7.43106	6.91112	7.21977	6.89531	8.16361	7.18646	8.27499	6.96364	7.12688	7.1581	7.31589	7.63419	7.06167	7.00217	6.55471
CALB1	1.34259	0.00884111	0.0226472	6.29547	4.95288	5.14624	5.69663	5.95907	6.40786	11.5359	5.25704	5.68171	10.386	5.79131	5.42362	7.7679	5.41489	5.24501	6.40172	5.9154	5.47139	5.74245	6.41513	4.94353	6.02335	6.09873	8.11554	5.32877	5.12851	5.38219	5.5726	5.60086	9.17013	5.82413	7.39121	5.89857	5.11759	5.52298	6.38198	7.90553	5.83934	5.46898	6.01223	5.52641	9.02935	10.2598	6.07562	5.28974	4.87331
CALHM1	1.44728	7.0426e-22	1.2025e-19	7.15078	5.7035	7.30003	7.07733	7.35335	7.22898	7.39367	7.01105	7.01874	7.32393	7.2959	7.13688	7.12484	7.34167	7.08007	6.83722	7.0812	7.15086	7.4747	7.40333	6.84725	7.38685	7.19179	7.39064	7.21215	7.02715	7.00478	7.2884	6.97056	7.09501	7.01699	6.9951	6.98099	7.42128	7.22725	7.43395	7.34409	7.63585	7.19889	7.0859	7.24601	7.09125	7.63234	7.45054	6.90942	6.90203
CALML4	0.722129	4.65795e-07	4.14976e-06	8.00656	7.28443	8.00288	8.22746	8.17633	7.20978	8.00315	8.03307	8.1919	7.64504	8.26878	7.62369	8.10517	8.01159	8.83064	8.28712	7.99707	8.2202	7.87895	7.80198	8.31508	7.97329	7.92835	8.23413	8.14649	8.06109	8.04299	8.33715	8.09916	8.43846	7.9296	8.59385	8.56645	7.58977	7.93155	8.28225	8.15483	7.9109	7.65155	7.9018	7.59957	7.847	7.65476	8.43126	8.06153	7.76331
CALN1	1.85174	6.6813e-07	5.75991e-06	7.91557	6.06383	7.83461	8.41085	8.96409	6.49801	8.53465	8.23983	7.84901	8.44352	8.95263	6.96268	8.43591	8.6575	8.17191	7.78204	8.49214	8.1267	9.23622	8.83996	8.09243	8.45498	9.27783	9.06507	8.83748	8.5105	8.74531	8.11855	7.87706	7.51739	6.99238	8.46567	8.44594	6.39615	8.49523	9.14358	8.48127	8.76069	7.84825	8.84507	8.15698	8.09554	8.91581	9.2425	6.44741	6.96708
CALU	0.728553	0.000966545	0.00352282	9.35885	8.63029	8.98676	9.56124	9.83728	8.64151	9.67327	9.65301	9.31377	9.67426	9.81694	9.01128	9.70159	9.81975	9.64791	9.36033	9.83802	9.40264	9.83014	9.57308	9.46324	9.78277	10.0694	9.97644	9.88689	9.81638	9.67555	9.5678	9.39601	8.967	8.35159	9.86019	9.86539	8.87547	9.51594	10.1874	9.66968	9.93627	9.3185	9.74822	9.40591	9.62544	9.82973	9.94754	8.38936	8.78067
CAMK1G	0.713403	0.00658544	0.0177641	9.01179	8.29839	9.47735	9.02492	9.57752	9.39601	9.28854	9.10346	8.86845	9.62282	9.52435	8.66197	9.21977	9.39846	9.14494	8.72858	9.35121	8.9356	9.36063	9.79472	9.13027	9.20706	9.42832	9.22131	9.32882	9.42769	9.18158	8.92726	9.15704	8.72334	7.01492	9.29893	9.30444	9.26551	9.43384	9.65444	9.79122	10.0893	9.71868	9.51689	9.60737	9.76668	10.007	9.52435	8.14713	8.44568
CAPG	0.841028	0.00242283	0.0076928	8.69951	7.85848	8.87183	8.89847	8.65984	8.53804	9.18052	9.37355	10.1734	7.70296	7.85765	8.18668	7.30248	9.51001	8.48899	9.59084	8.37613	8.90558	9.43037	7.94054	7.54569	7.80198	8.44327	7.7385	8.23159	8.77187	8.47242	8.37708	7.79254	9.59169	8.66852	8.96838	7.0077	9.37546	8.75005	7.62983	8.35941	7.70181	8.05895	9.26107	7.3253	9.13525	8.37708	8.80292	9.41464	9.01877
CAPN10	0.836323	0.00203182	0.00662978	8.89357	8.05725	8.70688	9.09136	9.22811	8.32706	9.30665	9.01667	8.38662	9.35215	9.25385	7.80503	9.16172	9.07979	9.32071	8.9152	9.08502	9.09484	9.13185	9.26409	8.88463	9.64618	9.66397	9.30555	9.18417	9.48859	9.19369	8.58281	8.84716	8.27208	7.06221	9.12155	9.33563	7.64391	9.20066	9.6106	9.51088	9.41132	9.39041	9.56006	9.3506	9.40445	9.7676	9.62235	8.26607	9.44012
CAPN10-AS1	0.663653	0.000289538	0.00125419	7.46831	6.80466	7.66533	7.08343	8.00728	7.99211	7.17724	7.26059	6.94074	7.34741	8.06505	7.17078	7.80154	7.47811	7.68344	6.90372	7.44022	6.97814	7.85077	8.25805	7.62566	7.34264	7.89783	7.74725	7.09181	7.72741	7.37178	7.24746	7.26705	6.95346	7.0079	7.3324	7.39899	8.18224	7.79904	8.49462	8.31291	8.84232	7.68565	7.24293	8.25399	7.61346	8.61641	8.01303	7.00327	6.61535
CAPS	0.659132	0.00117319	0.00415198	8.25243	7.5933	7.9729	8.85927	8.30204	7.91345	8.53416	7.7652	7.65868	8.66282	7.52321	7.71572	8.40753	8.89759	9.68796	8.92343	8.17078	8.76723	7.66005	8.14548	9.29716	7.62152	8.22658	7.84195	8.26784	7.69975	8.36535	8.6677	7.54052	8.37683	7.9294	8.28524	8.0392	9.05423	8.3363	7.64288	7.88462	8.05372	7.68465	7.90738	8.70432	7.81642	7.78762	7.99877	7.73293	7.41105
CAPSL	4.12088	1.21653e-18	1.03859e-16	10.6919	6.57107	11.1273	11.2047	11.5731	10.604	11.3437	10.7671	10.4	11.4299	11.4046	10.0944	11.2128	11.0533	11.1818	10.4066	11.1918	10.2427	11.1671	12.0068	10.9021	11.3544	11.4509	11.1106	11.4299	11.594	11.1707	10.245	10.6895	9.97149	5.33214	10.596	10.9512	9.97023	11.0254	11.0718	11.3375	11.0518	11.3755	11.6096	11.3771	11.4864	11.7584	11.4841	9.38541	10.736
CARD14	0.903085	9.34842e-08	9.60448e-07	7.78739	6.8843	7.66321	8.02895	8.15587	6.9697	8.13201	7.95704	7.77353	8.18668	8.11038	7.34762	8.0598	7.94479	7.97619	7.71736	7.93255	7.80899	8.18361	8.0779	7.82779	7.95434	8.36705	8.06208	8.13176	8.10616	8.06702	7.82311	7.83595	7.48582	6.96785	8.12623	8.09651	6.91043	8.01325	8.60877	8.08481	8.30636	7.98282	8.12972	8.15395	8.09097	8.17377	8.38012	7.12921	7.63999
CARD9	0.873111	0.00834933	0.0216436	7.33273	6.45962	8.56537	7.45378	6.66332	7.53573	8.82519	6.91655	7.38616	6.72643	7.36586	7.12329	6.10089	6.54618	9.01975	6.31681	7.03787	5.97647	5.81465	7.22949	7.03823	7.65068	6.58681	6.39005	7.49229	5.8291	7.19412	7.72461	5.77492	7.90509	9.39757	7.99404	8.72555	8.28869	6.85054	6.38936	6.65899	7.16728	8.31003	7.08742	5.47706	8.30438	5.48368	6.14069	8.18611	7.90002
CASC10	0.677022	0.000598841	0.00234053	8.84391	8.16689	8.70171	8.69455	9.40139	8.60516	8.85683	8.98875	8.53516	9.41932	9.04204	8.36409	9.27917	8.93673	8.75256	8.60286	8.88687	8.52818	9.11786	9.40264	8.51287	9.30632	9.10597	9.09101	9.26371	9.3386	9.12928	8.50816	8.81415	8.62313	7.46005	8.85337	9.05118	8.64822	9.18378	9.50924	9.34111	9.72164	9.11224	9.20828	9.29102	9.22165	9.50504	9.22775	8.87072	8.27476
CASC22	0.682783	4.0488e-06	2.88948e-05	4.65343	3.97065	5.05931	4.80119	4.63061	5.16064	5.22722	4.38233	4.69506	5.36746	5.07425	4.4608	4.92041	4.80666	5.08814	4.76574	4.96583	4.80186	4.52629	4.95125	4.96252	4.51483	4.91732	3.98406	4.50834	5.39455	4.26371	4.38712	4.22575	4.09763	5.45756	4.6507	4.72272	5.06492	4.53169	4.71695	4.50736	4.23791	4.28214	4.95861	4.53252	5.43065	5.16482	4.38091	4.09935	4.44173
CASC5	0.999023	4.59378e-11	9.33442e-10	6.88487	5.88585	6.50952	6.94616	6.61454	6.24054	7.24061	6.93501	7.1891	7.11829	6.78663	7.01474	6.74763	6.49291	6.32474	6.99795	6.55912	7.11693	6.65037	6.8075	6.77838	6.90016	6.18783	6.42513	6.84949	6.32474	6.88618	6.82113	7.13098	6.49669	6.45139	6.67475	7.10325	6.33566	6.60819	6.44573	6.78011	6.91874	6.91094	6.90788	6.922	6.93922	7.47874	7.12561	6.74841	7.17869
CASP14	0.747883	5.032e-06	3.51334e-05	6.7205	5.97261	7.39548	6.53144	6.92616	6.15763	6.3889	6.91148	6.80109	6.12727	6.55602	6.70457	6.20491	6.88774	6.71479	6.62024	6.9815	6.52706	6.37881	7.05546	6.53144	6.25781	7.61019	7.6531	6.99054	6.103	6.72177	7.31528	6.39615	7.18438	5.99886	7.25808	7.17541	6.59823	6.76436	6.91024	6.33007	6.91254	6.41476	7.16283	6.16407	6.42656	6.93606	7.79884	6.79862	7.36959
CASQ2	0.687216	0.00359695	0.0107092	8.13019	7.44297	8.09138	8.15698	8.74531	7.98761	8.41548	8.26762	8.02237	8.20147	8.50374	7.66005	8.20544	8.28689	7.77078	7.79682	8.26461	8.01017	8.81602	8.80318	7.834	8.22409	8.93534	9.01696	8.44475	8.25728	8.21314	7.93021	7.9451	7.42627	7.19907	8.35539	8.41223	8.15718	8.29474	9.04934	8.77134	9.26551	8.36077	8.81415	8.8233	8.83915	9.3185	9.51781	7.33819	7.17724
CASR	0.704682	0.000179283	0.000826017	7.77284	7.06816	7.79974	7.88846	8.25805	7.67795	8.03283	8.06965	7.86574	7.83827	7.96629	7.31175	8.02831	8.02454	8.05857	8.05345	7.96411	7.81327	8.02685	8.32473	7.76542	8.05737	8.1428	8.21126	8.11058	8.09612	8.03886	7.98385	8.03482	7.85348	6.08957	8.36214	8.36192	7.34082	8.03867	8.33975	7.95995	8.46737	7.97483	8.20284	8.14094	8.23293	8.09841	8.06378	7.15677	7.22512
CATIP-AS1	2.07787	3.53995e-13	1.06852e-11	8.68799	6.61012	8.73662	8.69717	9.26011	8.69086	8.97291	9.06535	8.73056	8.81074	9.09136	8.38329	8.69956	9.25038	8.88119	8.70089	8.95318	8.44517	9.38351	9.31325	8.68286	9.146	9.42196	9.51499	9.3497	9.1849	9.0466	8.41383	8.75256	8.34114	6.66488	9.08439	8.87659	8.6067	8.76348	9.68091	9.20602	9.60276	9.01342	9.36033	8.87263	9.29141	9.59671	9.68647	7.471	8.00749
CATX-1	0.818359	4.33696e-05	0.000240091	6.19659	5.37823	5.96426	5.73024	7.38225	5.54323	6.18531	6.04446	5.84649	6.33362	6.57817	5.72263	6.08981	6.80377	6.27302	6.39005	6.29357	5.60056	6.86712	6.5355	6.05394	6.97309	6.6197	6.86202	7.03472	6.75629	6.59226	6.05394	6.37986	6.06202	6.20416	6.58864	6.45408	6.02685	6.5294	7.26039	6.79235	7.25871	5.91439	6.25109	6.1164	6.69382	6.45431	5.91382	5.119	5.24764
CAV3	0.838087	0.00423313	0.0122771	8.98177	8.14369	8.88159	9.31773	9.51359	9.43899	9.37802	9.507	8.57906	9.26587	9.771	8.65572	9.00411	9.28206	9.22632	8.91911	9.18417	8.74116	9.66471	9.6368	8.74948	9.43899	9.89471	9.73785	9.57415	9.64747	9.50289	8.94176	9.06144	8.59527	9.04834	9.39917	9.32954	8.79523	9.56207	9.8827	9.7086	9.8281	9.37696	9.19106	9.33111	9.32563	9.63105	10.1443	7.65328	7.98245
CBLN3	0.660065	0.0249248	0.0524871	9.02869	8.36862	8.6851	9.06787	9.6816	7.97967	9.40305	9.58102	9.00109	9.41688	9.33787	8.5041	8.99885	9.1813	9.24071	8.94955	9.25838	8.84716	9.67555	9.54836	8.9015	9.56869	9.59339	9.72314	9.6968	9.7086	9.44436	9.09642	9.45743	9.21689	7.31855	10.1518	10.1647	8.42313	9.49023	10.0254	9.73934	10.0599	9.17122	9.61772	9.6368	9.65301	9.97813	10.1369	7.77944	8.17987
CBS	1.45783	1.25955e-08	1.56367e-07	9.23515	7.77732	9.65075	9.9519	8.69956	9.977	8.07029	9.10597	10.1436	9.92017	9.29605	9.81284	9.06979	9.81382	9.22598	9.512	8.37013	9.23914	8.66068	8.96385	9.55567	9.69822	8.76575	8.84763	8.87293	9.245	10.1708	9.99129	8.71174	9.70899	9.39994	9.67821	9.80285	9.78972	9.03283	8.813	9.22699	7.73118	8.54519	8.22765	8.29367	8.38775	7.46556	7.71572	9.56207	9.02799
CBX2	0.806428	2.5932e-07	2.42634e-06	8.0419	7.23547	8.28096	7.86143	8.29204	8.03283	8.13623	8.09932	7.65611	8.08846	8.39509	8.08927	8.17826	8.11326	7.83574	7.62718	8.00073	8.17285	8.30591	8.48621	7.93779	8.02005	8.31641	8.28016	8.1925	8.27136	7.94872	7.88743	8.51845	7.65229	7.42967	7.98741	8.26851	7.90282	8.20805	8.6469	8.38775	8.78929	8.15138	8.2057	8.454	8.45325	8.68583	8.71515	7.48699	7.65847
CC2D2B	0.99523	0.0231491	0.0494261	10.5144	9.51912	10.382	11.0045	11.4684	9.76889	11.046	11.0402	10.6258	11.0448	11.407	10.0273	11.2822	10.9965	11.4026	10.732	11.1259	10.8742	11.3544	11.37	10.9269	11.4026	11.6862	11.4889	11.4912	11.5085	11.3238	10.8124	10.9311	10.235	8.63675	11.6154	11.5855	9.76889	11.0199	11.3175	11.1799	11.6555	10.9554	11.1948	11.2179	11.2414	11.2767	11.2955	8.66006	9.76526
CCDC104	0.673828	0.00845269	0.0218677	9.81213	9.1383	10.3686	10.0057	10.3786	10.5912	10.0893	10.0033	9.74236	10.327	10.6456	9.67555	10.2091	10.4592	10.1118	9.46644	10.2246	9.78927	10.3277	11.1689	9.85972	9.79324	10.3539	9.90957	9.86317	10.1331	9.67878	9.13823	9.8827	9.08771	8.26024	9.84772	9.58499	9.58345	10.0329	10.3034	10.3993	10.7167	10.4852	10.0932	10.6767	10.697	10.8594	10.1436	8.82682	9.73212
CCDC107	0.584964	3.75906e-05	0.000211788	8.23235	7.64739	8.55148	8.1527	8.75954	8.73474	8.09534	7.80919	8.247	8.37235	8.42583	8.3264	8.17592	8.32378	8.39252	8.17034	8.4095	8.01664	8.53529	8.85793	8.3705	8.32009	8.4871	8.30358	8.3615	8.31488	8.7146	7.93586	8.08441	7.85787	7.49953	8.28911	8.18068	8.89352	8.2202	8.71382	8.43682	8.80805	8.66176	8.5936	8.49898	8.42984	8.94592	8.33829	7.87443	7.86262
CCDC108	1.12826	2.41528e-08	2.82958e-07	7.0187	5.89043	7.18798	7.09519	7.58536	6.59376	7.45871	7.41948	7.17891	7.7153	7.24273	6.776	7.01953	7.24808	7.15617	7.11244	7.16509	7.10619	7.2818	7.52182	7.06685	7.43476	7.09657	6.87217	7.24702	7.33748	7.47811	7.04998	7.38185	6.58824	5.2357	7.23209	7.14023	6.25842	7.47854	7.59767	7.47665	7.97843	7.56116	7.07819	7.62739	7.64658	7.27538	7.37503	6.27202	6.79149
CCDC113	0.878261	0.0232009	0.0494999	7.43836	6.5601	8.5572	7.66789	6.33761	8.94397	6.08098	6.85034	7.42128	6.52211	7.90652	8.72686	8.31866	7.9109	10.2479	8.50181	8.26851	8.52969	7.80503	6.11415	8.62071	7.39935	5.66162	7.78528	6.83235	7.12024	7.59039	8.07224	7.48736	8.53588	7.98489	6.103	6.12275	6.60777	7.593	5.33771	6.48911	3.95937	6.94739	6.49526	8.13054	6.21359	7.01817	6.46988	6.86262	8.43916
CCDC116	1.19277	2.53467e-13	7.93342e-12	6.49443	5.30166	6.22062	6.75533	6.34181	6.41314	5.77896	6.76222	6.2828	5.64518	6.69129	6.12293	5.7763	5.854	6.41974	7.16454	5.86484	6.33566	6.41493	5.84028	6.40472	6.92352	6.76045	6.34856	6.80546	6.622	6.57129	6.73648	6.27302	6.30801	6.83872	6.6036	6.30763	6.37817	6.4532	6.93331	6.30886	6.31877	5.95265	6.78147	6.54245	6.32003	6.55001	6.08671	6.65292	6.88483
CCDC138	0.972999	7.98016e-12	1.84804e-10	8.09773	7.12473	7.96848	8.33906	8.25447	7.63107	8.06655	8.41339	7.92897	8.24421	8.04502	8.17742	8.52634	8.35581	8.31714	8.29992	8.32073	8.29646	8.55575	8.08699	8.247	8.41945	8.39861	8.092	8.43454	8.19277	8.3744	8.43338	8.41524	8.09277	7.06488	8.41971	8.08586	7.18856	8.13851	8.44475	8.34683	8.1925	7.9539	7.81569	8.12694	7.98201	8.35387	8.53727	7.83827	7.57088
CCDC140	1.01595	0.0145608	0.0339223	8.84918	7.83322	8.86122	9.21908	9.99804	8.97327	9.20198	9.48382	8.27476	9.49886	9.49136	8.19831	9.15165	9.14792	9.36393	8.6111	9.12563	8.65726	9.91749	9.60239	8.90739	9.69636	9.74438	9.31489	9.8808	9.91037	9.62591	8.74383	9.02561	8.30957	4.95059	9.26813	9.52358	8.64489	9.58874	9.93805	9.70417	10.4393	9.81238	9.73355	10.1921	10.0216	10.1807	9.84558	7.17404	7.90571
CCDC146	1.26043	0.000505963	0.00202562	8.82186	7.56143	9.60498	9.74822	9.14887	9.61441	7.32798	7.6705	9.40481	9.16264	8.01114	8.61746	9.95135	10.8147	9.56969	8.71572	9.42414	9.4197	9.05242	8.36279	11.0788	9.01342	7.68405	8.23738	7.86027	10.7393	8.9543	8.21699	8.03081	7.31704	8.23648	7.71274	7.51097	11.9083	10.2398	9.0864	10.0179	8.41592	8.22038	8.29324	9.22304	8.85509	8.4273	8.4584	11.0629	8.06542
CCDC151	1.03358	0.00535794	0.0149591	9.32555	8.29197	8.92885	9.41932	9.6968	9.74391	9.46967	9.47613	8.80608	9.48773	10.6788	8.72664	9.32998	9.00109	9.47148	9.22255	9.28046	9.50455	9.57224	9.9125	8.75225	9.62764	10.3778	10.2364	9.5487	9.49023	9.81339	9.7312	9.67379	9.43212	6.40531	9.8672	10.3908	10.0348	10.4034	10.6952	10.8013	10.382	9.49234	10.3362	9.99129	9.7937	10.6874	10.8621	7.93884	8.43009
CCDC168	0.667402	2.9006e-07	2.69451e-06	5.92075	5.25335	6.04265	6.12655	6.00076	6.03806	6.07055	5.97332	5.8433	5.9116	6.08687	5.91582	6.10867	5.7982	6.02551	6.1179	5.98495	6.07751	5.82665	6.0079	5.98377	5.93303	6.06936	5.98895	5.86808	5.76553	6.31408	5.84382	5.95352	5.90012	5.59659	5.98846	5.88138	6.55602	6.35303	6.31004	6.25298	6.25516	6.3907	6.08271	5.94146	6.19435	6.79327	6.31596	5.42068	5.56772
CCDC177	2.84911	4.88927e-11	9.88221e-10	8.70269	5.85358	8.45539	9.1813	10.1588	7.34864	9.1742	9.32954	8.64373	9.17679	9.44513	8.0476	9.46438	9.4842	9.38204	8.73902	9.12353	8.372	9.98432	9.49498	8.94691	9.84388	9.75622	9.15866	9.96888	9.61735	9.44596	8.61466	8.73453	8.2827	6.05306	9.02187	8.95375	7.14545	9.37395	9.76988	9.32152	10.2459	9.04337	9.90551	9.61496	9.87621	10.0658	9.93908	7.31491	7.57444
CCDC178	0.663823	0.0157573	0.0361901	8.05369	7.38987	7.77316	8.14321	8.76121	7.64824	8.38725	8.67688	8.42144	8.25072	8.63212	7.67694	8.15698	7.80395	7.84527	7.86704	8.27236	7.75967	8.59811	9.01483	7.69463	8.31582	8.78985	8.69056	8.63048	8.58687	8.39365	7.77078	8.09039	7.83166	7.83865	8.23738	8.35605	7.97377	8.97266	9.27708	9.15292	9.18694	8.36657	8.6936	8.69278	8.65306	8.97146	8.88338	6.63668	6.6423
CCDC26	0.639261	3.38524e-07	3.10065e-06	5.38823	4.74897	5.35895	5.19625	5.46053	5.34821	5.34176	5.45728	5.45572	5.2654	5.37177	5.43785	5.49329	5.4049	5.61019	5.34394	5.34821	5.33624	5.52114	5.755	5.39972	5.55734	5.41383	5.73884	5.08247	5.45327	5.38069	5.31538	5.52737	5.26686	5.10325	5.81304	5.62227	5.4708	5.32233	5.78491	6.14579	5.73884	5.97524	5.49958	5.54577	5.30381	5.33846	6.16307	5.35571	4.99341
CCDC3	0.666333	0.0173798	0.0391619	9.2763	8.60996	7.84345	8.46761	10.615	8.67141	8.89641	8.81074	8.76959	9.46175	9.79424	9.68263	11.1413	8.99038	8.38442	9.21395	9.46105	8.76878	9.60737	9.49097	8.33691	11.0127	8.97551	9.92607	10.5178	9.97935	9.2801	8.56155	8.67039	8.32933	9.45504	8.83693	8.71487	8.57508	9.07979	11.0671	8.61913	9.60112	8.59236	9.15764	9.05084	8.86786	9.16505	9.63627	10.0129	9.29361
CCDC36	0.971609	1.55609e-21	2.48975e-19	6.81874	5.84713	7.1461	6.68475	6.75608	7.20589	6.82841	6.68518	7.0192	6.5175	6.75874	7.13141	6.90604	6.69874	6.73794	6.90631	6.79682	6.94975	6.73757	6.90823	6.9003	6.77244	6.65516	6.73299	6.58942	7.06544	6.65793	6.83895	6.84403	6.80249	6.91874	6.71237	7.32266	7.20961	7.13571	7.00101	6.76868	6.67758	6.67304	6.57531	6.71103	6.91838	6.68402	6.81031	6.86582	6.57599
CCDC58	0.647759	0.000267894	0.00117227	7.44725	6.79949	7.45903	7.35219	7.12226	7.41012	6.88863	7.49969	7.18027	8.06063	7.32054	7.01001	6.94154	6.86627	7.61568	6.36471	6.51772	7.2783	7.76563	7.51955	6.87671	8.13286	7.3928	6.9011	6.94354	7.11046	7.23167	6.70382	7.12709	7.20245	7.721	7.35315	6.97883	8.0396	8.53064	6.75401	8.07259	7.63827	7.90965	6.87147	7.54852	7.63923	7.90593	8.43478	7.60701	8.33996
CCDC6	0.721082	0.00194421	0.00639224	10.4475	9.72638	10.4862	10.0028	9.80679	10.545	11.0056	10.3804	10.5267	9.84558	10.7167	11.8895	10.9524	10.1907	9.76018	11.1998	11.2128	10.1336	10.6952	10.2195	12.8837	10.6559	9.81825	9.26885	10.1727	9.31409	10.1844	10.3331	9.59513	11.7824	10.6532	11.0402	9.90168	9.7326	10.4582	10.2168	10.1621	9.57883	10.6758	10.104	10.5434	9.91627	10.7821	10.1262	10.7515	10.6327
CCDC7	0.796471	0.000897905	0.00330609	8.27734	7.48087	8.33525	8.59935	8.90649	8.19831	8.8043	8.58757	8.18386	8.5676	8.68132	7.87254	8.62631	8.62238	8.20056	8.10517	8.48686	7.95293	8.66886	9.02338	8.10167	8.78348	9.03943	8.44053	8.77625	8.67734	8.59264	8.47789	8.31992	7.97843	9.64512	8.56375	8.48761	7.94033	8.54566	9.08082	8.56328	8.4244	8.46425	8.72056	8.38642	8.5635	8.93104	9.10473	7.21847	7.40147
CCDC70	0.787537	0.00248528	0.00785296	6.32798	5.54044	6.12045	6.06223	6.77838	6.01449	5.99767	6.36994	5.93368	5.8779	6.73988	5.76553	6.13846	6.30331	6.37943	5.99201	6.61196	6.09298	6.75231	6.65704	5.9779	6.22181	6.49423	6.79705	7.2104	6.1303	6.10514	6.67124	6.00613	6.26001	10.4556	6.32691	6.39637	6.21924	6.37488	6.46795	6.22619	7.79233	6.9003	6.53144	6.66611	6.24475	7.22147	7.62025	5.6983	5.40812
CCDC85B	0.665386	6.47214e-07	5.6007e-06	7.5345	6.86911	7.79216	7.28787	7.81507	7.37356	7.49021	7.68665	7.04663	7.50926	7.40333	7.00671	7.1439	7.34361	7.54174	7.34187	7.04393	6.9106	7.53749	7.53786	7.21073	7.59937	7.58859	7.55064	7.8831	7.85538	7.33649	7.56492	7.14354	7.64723	7.77923	7.37863	7.67587	7.2752	7.40765	7.58809	7.5982	7.86973	7.04959	7.72234	7.36904	7.35979	7.23228	7.62759	8.17481	7.62312
CCDC86	0.753613	0.000809299	0.00302859	9.19956	8.44595	9.05891	9.23375	9.77621	9.39846	9.24864	9.37116	8.64899	9.29283	9.60909	8.43454	9.14005	9.57583	9.07325	8.75317	9.33452	8.68583	9.91092	9.77562	8.84285	9.53801	9.85849	9.60684	9.79882	9.66521	9.39377	8.70288	9.00038	8.44856	8.25024	9.256	9.65392	8.91754	9.52301	9.87972	9.73538	10.1542	9.30444	9.50111	9.77513	9.81825	10.2406	9.9674	8.42244	8.73288
CCDC87	0.748801	0.019357	0.0427939	8.72684	7.97804	8.10361	8.94896	9.64838	7.78595	9.22339	9.15233	8.65167	9.16798	9.15431	7.77146	8.83576	9.0095	9.13286	8.45941	8.82948	8.22894	9.57354	9.32462	8.48414	9.35507	9.64512	9.32563	9.55267	9.52601	9.1876	8.50991	8.79957	8.25331	6.8453	9.11954	10.2847	7.82672	9.42769	9.79324	9.58874	9.90028	9.05341	9.57415	9.51499	9.49355	9.82243	9.71102	7.26208	7.78832
CCDC88C	0.822825	3.80734e-06	2.73249e-05	7.50343	6.68061	8.81217	7.1834	6.79562	7.35861	7.43342	7.02468	7.72257	7.34447	7.63299	8.85894	7.20607	7.67235	7.57107	7.61056	7.2089	7.49313	7.23194	7.15291	7.90075	8.00384	7.00179	7.26435	7.338	7.35501	7.36504	7.18662	7.54717	7.60515	7.25534	7.34583	7.03537	8.05258	6.90922	6.50606	7.14742	6.64029	7.66338	7.19012	7.33981	7.62152	7.0624	7.22476	8.08295	7.95434
CCDC9	0.7675	0.0155649	0.0358347	9.80373	9.03623	9.70417	9.76425	10.1383	9.13118	10.1928	9.96259	9.74579	10.1398	10.5646	9.57261	10.0575	10.4582	10.2832	9.45095	10.3468	9.78325	10.4074	10.5035	9.58909	10.0185	10.5609	10.8764	10.2189	10.2936	10.1815	9.25182	9.8808	9.15266	7.83613	10.3182	9.99804	9.3444	10.5528	11.0019	10.8621	10.8798	10.083	10.714	10.3844	10.8826	10.8452	11.0533	8.94691	9.28278
CCDC96	1.84554	1.07109e-09	1.65585e-08	8.64674	6.8012	8.79047	8.67141	9.24324	8.83186	8.42626	8.98336	8.10118	9.07353	8.9632	7.79518	8.86884	8.62922	9.13686	8.61356	8.86254	8.53326	9.14464	9.23985	8.6645	9.0689	9.00308	8.9343	9.10346	9.2129	8.96924	8.30417	8.73579	8.33854	6.53278	8.80486	9.18231	9.32882	9.41388	9.41339	9.27217	10.2739	9.61916	9.28241	9.84714	9.82243	9.53893	9.03654	7.0519	8.01325
CCKAR	0.695301	0.00951628	0.0240562	8.17415	7.47885	8.57577	8.40024	8.80752	8.56789	8.55646	8.58232	7.98385	8.76236	8.47333	8.02108	8.43478	8.53228	8.33952	8.03414	8.57187	8.06109	8.73056	9.00983	8.163	8.79338	8.76821	8.44402	8.77108	8.87517	8.45708	8.06965	8.34363	7.69399	7.23791	8.39906	8.44279	8.11119	8.62238	8.93008	8.83501	9.06507	8.52747	8.81884	8.62262	8.93613	8.84083	8.52509	6.99238	7.12187
CCL11	0.719444	3.22284e-07	2.96139e-06	6.93052	6.21108	6.99474	6.58454	6.86392	6.75418	6.92313	6.80687	7.17268	6.9113	7.058	6.92279	6.86712	6.8336	6.86847	6.8033	7.60037	6.62085	6.85997	7.20095	6.61695	6.88674	6.98016	7.19907	6.67124	6.65538	7.52803	6.68	6.80729	6.99092	7.43416	6.6112	6.72954	7.18919	7.01206	7.0922	6.76801	7.3724	7.10619	7.63942	6.48502	7.2552	7.2437	7.38554	6.46297	6.53492
CCL13	0.678536	0.0239231	0.0507802	7.97836	7.29983	7.8893	8.19103	8.7422	7.92018	8.20741	8.27281	7.73563	8.2157	8.74728	7.2707	8.13603	8.35771	8.17742	8.15309	8.12483	7.83595	8.74912	8.59696	7.80582	8.30459	8.76543	8.36367	8.50696	8.42355	8.45049	7.80662	8.21356	7.91505	7.88046	8.41692	8.72858	8.46407	8.49416	8.86513	8.74589	8.95088	8.04932	8.67166	8.55896	8.82777	8.8645	8.75692	6.58189	6.80249
CCL15	0.826036	0.000200835	0.000911906	6.92058	6.09454	6.8336	6.70649	8.47167	6.49401	6.63402	7.10188	6.72278	6.622	7.61587	6.65172	6.95499	6.88464	7.29721	7.18157	6.76823	6.92055	7.75387	7.58223	6.76647	7.71333	7.44902	6.80416	7.92365	8.04471	7.21554	6.985	6.69362	6.89585	7.06723	7.37639	7.41819	6.69854	6.94418	7.41914	6.94295	7.82246	6.75384	7.26945	6.38869	6.79017	7.63902	7.69552	5.93542	5.69197
CCL20	0.718396	0.0369425	0.0719051	9.46269	8.7443	9.31728	9.89413	10.4925	8.35137	9.85415	9.61005	8.62822	9.84122	10.3747	8.51466	9.43639	9.5407	9.15629	9.05891	9.85849	8.54017	10.0773	9.95338	9.3574	10.1295	10.1787	9.44474	10.0293	9.99187	9.86481	9.54556	9.09249	9.44053	7.39568	9.72119	10.2936	6.33584	9.63723	9.70009	9.9218	10.444	9.4233	10.199	9.76668	10.1174	10.2622	10.5702	10.714	9.29574
CCL25	1.00097	0.00183737	0.00609262	7.46999	6.46902	7.46182	7.78615	8.08441	7.08081	7.71752	7.59699	7.13402	7.51488	8.1919	6.76116	7.43528	7.39224	7.74165	7.3432	7.45109	7.05097	8.18159	8.26762	7.02362	7.77221	8.60352	8.61641	7.69399	7.5804	7.80036	7.14332	7.65611	7.39312	6.20111	8.44181	8.40163	6.78341	8.16882	8.8067	8.4871	8.98769	7.26904	9.05794	7.74143	7.97947	9.09484	9.37696	6.38198	6.94616
CCL26	1.04434	0.00279754	0.00867194	8.95273	7.90838	9.2526	9.12767	9.2425	9.00559	9.66561	9.29716	8.04175	9.4346	9.70899	8.65726	8.93456	9.32492	9.22131	8.17554	9.02369	8.59988	9.58304	9.88123	8.9152	9.03594	9.5701	9.69636	9.32462	9.51995	9.21833	8.70688	8.88935	8.17285	5.18024	8.98472	9.05454	8.86394	9.4824	9.93115	9.96843	10.1581	9.7837	9.47385	9.70766	10.0446	10.1881	10.0843	8.12583	9.08576
CCNA1	1.66312	5.12358e-05	0.000278516	9.14343	7.48031	8.83778	8.83609	9.06017	10.376	8.35791	8.78152	6.95237	10.3248	9.22775	11.1181	9.21689	10.8088	9.1467	11.3656	8.47402	7.86704	7.31589	10.8594	9.6558	8.13093	7.30629	10.4697	10.007	7.21427	8.8923	9.16765	7.87097	9.44806	8.39302	9.21324	7.06602	9.23438	8.68238	7.55121	9.75672	9.68703	9.19546	9.98625	9.71537	9.78972	9.00223	8.98372	8.98875	9.89973
CCNA2	1.23264	1.33397e-10	2.47939e-09	8.41769	7.18505	8.72911	9.02214	8.62975	8.40885	8.57508	8.65929	8.5316	9.65167	8.29004	8.84435	8.52584	7.73829	7.52827	8.62605	7.68284	8.67712	8.57597	8.48875	8.13201	8.56953	7.41053	8.53727	8.40317	7.48306	8.97231	8.58447	9.20736	8.22384	7.57595	8.25072	8.26024	8.21867	8.2129	7.38079	8.06678	7.94704	8.88389	7.84425	8.47287	7.88639	8.78954	8.44568	7.82496	8.69331
CCNB1	1.71628	8.5504e-09	1.10092e-07	8.88699	7.17071	8.73424	8.58117	8.12139	7.91751	9.6563	8.86727	8.37463	9.88689	8.48414	9.80536	8.73555	8.77855	8.05614	9.43427	7.95908	9.80037	9.35152	8.95172	8.72999	9.84295	6.7361	8.54403	9.35152	8.20985	9.09101	8.6003	9.60239	9.64838	8.4244	8.98255	8.54981	7.6531	9.0408	7.13554	8.81789	7.44596	9.10301	8.76208	9.47454	7.12826	9.50407	8.39534	9.59671	8.9865
CCNB2	1.22068	8.42915e-08	8.74247e-07	7.95261	6.73193	8.36635	7.94118	7.38414	6.92386	8.72166	8.19318	8.0856	8.46692	8.285	8.12931	7.63172	7.08265	6.50833	8.69167	6.99205	7.95113	7.81705	7.59699	7.94283	7.97425	6.90612	7.70511	8.10828	7.24844	8.53326	8.10324	8.54104	7.75835	7.99288	8.18568	8.17034	7.14923	7.93963	7.02273	7.42395	7.56801	7.67091	7.68107	7.84256	7.37064	7.40572	7.36374	8.12993	8.72636
CCNB3	0.604096	2.70635e-06	2.02225e-05	7.10446	6.50037	6.85743	6.96541	7.08063	7.45799	6.97762	7.16385	6.95701	7.20186	7.30341	6.85705	7.05641	6.99719	7.25018	7.18379	6.92804	7.48884	7.37759	7.2717	7.4829	7.04125	6.82546	7.56047	7.66508	7.86897	7.19066	7.21825	7.16793	7.11755	6.97422	7.48058	7.86239	6.91355	7.06451	7.04942	7.10772	7.80016	6.9337	7.28217	7.74104	7.22012	7.29798	7.07947	6.66611	6.74263
CCND1	1.28998	0.000429937	0.00175691	9.18505	7.89507	10.4953	7.96391	9.20406	8.63116	8.03696	7.96832	9.43974	7.94772	8.66525	9.01282	9.22566	10.8231	10.444	8.98915	10.4598	8.48875	8.34064	10.7694	9.3122	8.80996	9.73538	9.43974	8.26549	9.43899	7.59878	9.8739	9.55814	9.81184	10.659	10.1336	7.0029	10.954	7.79759	8.63308	7.87959	8.70311	7.35062	8.97698	6.79948	9.69394	9.89815	8.14048	10.201	9.22811
CCNE1	1.20479	5.83884e-06	4.00098e-05	9.50007	8.29528	8.69086	10.2465	10.0439	8.7448	9.6139	9.61145	8.92674	10.0129	9.61496	8.6612	9.75335	9.59296	9.4992	9.66613	9.47454	9.35507	9.81932	9.76468	8.85396	10.0081	10.1017	10.164	10.1687	9.57883	10.1248	8.80103	9.38578	9.53263	8.49586	9.76168	10.0113	8.44494	9.9674	10.1262	10.2217	9.97644	9.512	9.74189	10.1866	9.77149	10.1928	10.2501	8.5807	9.69771
CCNE2	1.34416	2.02837e-07	1.94588e-06	7.03155	5.68739	6.40619	7.21943	6.34038	6.19036	6.95237	7.21092	8.56907	7.60995	7.0264	7.40636	5.9593	6.45495	5.8197	7.39121	6.72762	7.51014	8.0467	6.81601	7.37001	6.98278	6.61176	6.63792	6.21439	6.29251	6.68402	7.39224	7.57245	7.40262	7.5982	7.14923	7.3189	7.02105	5.76839	5.57035	5.56798	6.3857	7.47776	6.89118	6.49423	6.54034	7.3313	6.46641	6.64915	6.99189
CCNO	0.814338	0.000571224	0.00225222	8.24818	7.43384	8.54981	8.27906	8.82385	8.57699	8.19918	8.16614	7.65437	8.789	8.38458	7.61781	8.52944	8.40252	8.34938	7.76107	8.77598	7.94304	8.52169	8.97754	8.23718	8.73716	8.56116	8.1463	8.70572	8.38442	8.47868	7.52519	8.0275	7.41105	6.66296	8.21222	8.46541	7.83827	8.45261	8.96009	8.84665	9.24283	8.82159	8.52841	8.96638	8.98535	8.95172	8.42376	7.55863	8.54061
CCNYL2	0.593357	0.00113192	0.00403085	6.45079	5.85744	6.23594	6.06046	6.04925	6.35123	6.46178	6.4238	6.1255	6.87089	6.56514	7.99185	6.79149	6.48173	6.0686	6.35707	6.5545	6.43843	6.34383	6.08687	6.30659	6.03297	6.81017	6.40455	6.00633	5.755	6.23659	6.51817	7.35484	6.61302	7.28198	7.18798	6.37633	6.76064	7.60598	6.23967	7.21532	6.58381	6.09936	6.35481	7.04883	5.9561	7.21134	6.56266	5.09336	7.49557
CCRL2	1.08049	0.000490341	0.00197219	7.39375	6.31326	6.56804	6.93463	7.77486	6.01607	6.79583	7.49502	6.40231	7.06189	8.08996	6.36926	6.68402	6.84131	7.24162	7.86348	6.81846	7.15159	7.38204	7.24649	6.885	7.6517	7.38079	8.91234	7.7822	7.62983	7.62216	7.72075	7.62739	8.22364	4.4818	8.67407	8.79683	6.50815	7.61422	8.99428	7.84425	9.02995	8.83525	7.66733	8.38347	8.29404	8.80318	8.34956	6.77648	6.81396
CCT5	0.686486	4.66997e-05	0.000256171	10.4059	9.71945	10.6387	10.629	9.61772	10.5359	10.7149	10.5855	10.4734	10.2982	10.5565	10.8134	10.632	10.8046	10.3539	11.258	10.3403	10.732	10.204	9.93355	10.835	10.2582	9.44513	11.0937	10.5818	9.93294	10.545	11.1868	10.8111	10.7002	10.8973	10.6387	10.6635	10.9808	10.2622	9.43601	9.83415	9.49136	9.99698	9.93859	9.65976	9.80873	9.47215	9.64086	10.5276	10.5403
CCT8L2	2.04668	9.37439e-08	9.62684e-07	8.26691	6.22023	7.54496	8.62944	9.16463	6.12796	8.80266	9.02492	7.97153	8.79935	8.92976	6.77974	8.63773	8.47707	8.98875	8.01861	8.49546	8.30678	9.18999	8.73789	7.94118	9.09585	9.1023	8.72555	9.29141	9.28393	9.04368	8.88159	8.76515	7.88002	5.63448	8.90357	9.44716	6.12166	8.80318	9.32379	9.0531	9.57718	8.62746	9.01228	9.33959	9.10785	9.14292	9.23814	7.59239	7.16302
CD177	0.679062	0.00984389	0.0247531	7.73955	7.06048	7.44797	7.69906	8.29623	7.59281	7.96213	8.31309	7.47682	7.9614	7.95887	7.19032	8.06702	7.99083	8.04781	8.06965	7.56474	7.72983	7.8764	8.24274	7.53247	7.5298	8.44621	8.30119	8.61641	8.10596	8.70628	7.57774	7.66482	7.74085	7.15416	8.62874	8.59527	7.29493	7.98245	9.4197	8.00404	9.27077	7.55101	8.25805	7.86726	7.43664	8.62822	8.17034	7.03393	6.66735
CD1A	2.04503	1.60052e-06	1.26473e-05	9.23663	7.1916	8.96129	9.79617	10.4793	7.79841	10.0904	9.83069	8.73288	10.0799	10.3582	8.01283	9.6196	10.0113	9.42382	8.89499	9.69964	8.91178	10.723	10.1283	9.15565	9.95297	10.7032	9.98309	10.2154	10.1542	9.90496	9.27152	9.23233	8.62419	8.43682	9.77251	9.83628	8.36301	9.95338	10.4654	10.377	10.3214	9.51689	10.3878	10.1815	10.036	10.8077	10.8538	7.34504	7.89235
CD200R1	0.819783	5.01831e-09	6.77398e-08	6.82689	6.00711	7.67603	7.21427	7.00046	7.40675	6.84482	6.88251	7.06741	6.8582	7.00569	6.8499	6.66239	6.87556	6.68261	7.09465	7.2454	6.55996	6.83853	7.03005	6.8769	7.22012	6.81193	6.64801	6.89348	7.04978	6.75384	6.71681	6.60301	6.7226	7.5137	6.9966	7.02008	7.30497	6.70211	7.13844	6.83096	7.23904	6.98777	7.0361	6.62592	6.78122	6.83722	6.63484	6.5698	6.57318
CD207	0.879366	0.00760114	0.019997	7.76991	6.89054	7.52198	7.721	8.82411	7.67109	7.93934	8.27668	7.39548	8.2118	8.42772	7.44229	7.94165	8.03886	7.72337	7.62425	8.07769	7.30003	8.68439	8.63773	7.75628	8.31089	8.50374	8.27159	8.63418	8.37235	8.21935	7.6262	7.85411	7.65207	5.23256	8.45941	8.12302	7.30889	7.80219	8.96442	8.3529	9.00284	8.00487	8.24125	8.45212	8.41752	8.88723	9.71868	7.14462	7.05097
CD24	3.17612	8.90487e-19	7.80626e-17	11.6623	8.48616	11.9204	12.6445	11.7621	11.7236	11.9747	12.4065	12.3248	11.0937	11.9747	11.6945	11.7211	12.6724	11.1136	12.3248	12.3996	12.7403	11.8211	12.0445	11.2165	11.7444	11.0803	11.4487	11.5652	10.5276	11.8996	12.0569	11.7621	11.3097	12.4143	11.8419	9.94881	12.3852	11.8495	11.4586	11.2798	11.1881	11.3193	11.2249	11.0518	11.9993	11.4751	11.0154	9.07193	11.5603
CD38	0.6481	0.0152903	0.0353198	8.63764	7.98953	8.57885	8.88309	9.26551	7.12675	9.02865	8.71653	8.29561	9.12767	9.26785	7.83556	8.73453	9.03147	8.99462	8.56668	9.00525	8.10741	9.24794	9.05923	8.58564	9.15532	9.31624	8.85536	9.2795	9.31288	9.30444	8.40317	8.62874	8.43313	8.03283	8.98502	9.02902	7.27576	9.02492	9.37649	8.83996	9.4734	8.97784	9.36927	9.23165	9.46967	9.55718	9.48732	7.61802	7.95154
CD3E	1.00352	0.00101911	0.00368358	8.10294	7.09942	8.07428	8.07975	8.47358	8.04259	8.35451	7.94099	7.88411	8.13388	8.50766	7.92122	8.10009	8.4503	8.21006	7.57885	8.31735	7.63299	8.7353	8.91294	7.99628	7.91236	8.99462	9.31558	8.53564	8.03941	8.10193	7.74165	8.24029	7.91369	7.04998	8.53971	8.87916	8.43338	8.70288	9.81133	9.54358	9.51995	8.50926	9.09484	8.38793	8.50926	9.42959	9.89584	7.02257	7.16102
CD40LG	0.626006	0.0135902	0.0320295	7.5291	6.90309	7.39509	7.78679	8.40482	6.78303	7.62966	8.15608	6.87556	7.85077	7.91046	6.84254	7.68284	7.7944	7.57461	7.3106	7.57444	7.26904	8.55682	8.40684	6.93016	8.01882	8.53064	8.25072	8.34542	8.19831	7.96411	7.33345	7.6993	7.24122	6.70944	8.19831	8.09476	6.75853	7.25959	8.58255	8.15003	8.7339	7.71716	8.19088	8.18969	7.73035	8.64009	8.91581	6.68145	6.49065
CD80	1.26629	1.62135e-12	4.28246e-11	7.22712	5.96083	7.43326	7.5459	7.73218	7.1363	7.55934	7.60257	7.09334	7.80845	7.46668	6.65432	7.55377	7.51157	7.21023	7.23244	7.43046	7.03329	7.60097	7.5557	7.19589	7.64149	7.52596	7.44673	7.56555	7.55863	7.50535	6.88384	7.05134	7.4245	6.68166	7.73311	7.52925	7.13973	7.59999	7.48715	7.42665	7.70014	7.53267	7.58243	7.51975	7.5123	7.44454	7.35614	6.22988	6.55266
CD82	0.72515	0.0037477	0.0110928	7.70682	6.98167	8.1612	8.41637	7.39414	8.11651	7.78867	7.11936	8.18046	7.74122	8.89847	7.69442	7.29294	7.06879	8.12779	7.28217	7.58444	6.96153	6.82955	7.73096	8.64326	7.48663	8.70311	7.18764	7.62877	7.22322	7.64805	8.24544	6.54883	7.84256	9.81339	8.56599	7.70241	7.16366	7.11207	6.73814	6.73225	6.43046	7.76447	6.97039	6.50505	7.39046	6.37572	6.85537	8.67874	7.49502
CD8A	0.965853	0.0044577	0.0128208	10.1958	9.22997	10.3644	10.3699	10.9071	10.4501	10.5394	10.5232	9.88123	10.8243	10.8873	9.62013	10.3984	10.5739	10.5315	9.91803	10.5789	10.1715	10.886	10.9896	10.3379	10.5502	10.8253	10.5047	10.9335	11.1259	10.5574	10.1324	10.1807	9.33048	8.30525	10.5685	10.6532	9.88216	11.0212	11.0757	10.991	11.4384	10.8147	11.0071	11.2432	11.2451	11.2724	10.6397	8.6851	9.78527
CD8B	0.951524	0.000313577	0.00134306	7.69689	6.74537	7.60781	8.09263	8.49546	6.90502	8.08191	8.3443	7.57695	8.09916	8.04259	7.37278	8.24461	8.14202	8.1284	7.77238	8.10741	7.79925	8.31371	8.13453	7.93988	8.35749	8.56222	8.28376	8.25465	8.16199	8.26528	7.85593	8.01559	7.58093	6.84482	8.44053	8.4273	6.83378	8.08416	8.52882	8.05441	8.32245	7.91915	8.05418	8.03565	8.12641	8.25072	8.14407	6.72685	6.80887
CDC20	2.33042	3.25711e-11	6.78712e-10	9.46447	7.13405	8.61722	9.6002	9.02713	8.66381	9.98993	9.42616	8.75256	10.2825	9.49886	9.48773	9.08502	8.42534	7.13862	10.1708	8.20343	9.37434	9.39601	9.18231	9.28459	10.0446	7.78942	8.39839	9.49429	7.42411	11.387	10.0664	10.1443	10.4184	8.06702	10.0169	9.59856	9.03262	9.61184	8.09736	9.46363	8.66381	9.87621	9.28423	10.3107	9.49136	8.95713	9.15907	9.70159	10.8314
CDC20B	0.914888	0.000706523	0.00269826	6.21762	5.30274	6.9977	7.40858	6.19501	5.64301	5.61587	6.01677	5.84154	6.03756	5.81377	5.62841	5.68953	7.08666	7.85284	7.15258	7.86769	5.6156	6.01311	5.85962	7.52087	6.25576	6.27348	6.54459	6.40786	5.9593	6.1592	5.79351	6.12823	5.64354	6.23769	6.10439	5.94009	5.57741	6.02576	6.3043	6.06722	5.90257	5.53761	6.3332	6.04332	5.6914	6.37776	6.00288	5.27869	5.23398
CDC25A	0.887064	7.85102e-06	5.23859e-05	6.9479	6.06083	7.3313	7.07947	6.20691	6.47389	7.04228	6.67455	7.16699	7.31755	6.38373	7.8661	7.42853	6.28132	6.34922	6.88169	6.34038	7.45464	7.09295	6.79428	6.3534	6.40193	6.30196	6.48216	6.93868	6.18932	7.16266	7.01321	7.47966	6.66869	7.17131	6.69129	6.41296	6.21971	6.03178	6.12103	6.37755	6.84131	7.11614	6.42817	6.99054	6.59743	6.87107	6.66928	7.92679	7.82672
CDC25C	0.608861	6.10229e-05	0.000324774	6.77241	6.16355	6.00999	6.91223	7.17969	6.06243	7.28096	6.87166	6.48067	7.16612	6.78485	6.48289	6.82719	6.62549	6.6092	6.837	6.73381	6.71931	7.51758	6.8779	6.34746	7.09027	7.14371	6.98168	7.22413	7.12987	6.98406	6.60999	7.02755	6.97526	6.27224	7.01624	7.17246	5.853	6.96865	7.08397	6.88694	7.17869	6.62592	6.77937	6.74474	6.83139	7.26135	7.19066	6.29251	6.70057
CDC45	1.12219	6.00425e-10	9.77078e-09	7.4244	6.30221	6.97925	7.797	8.43548	7.04764	6.9815	8.04153	7.01437	7.18321	7.83574	7.90876	6.9077	7.02393	7.17812	8.085	7.04446	7.75309	7.47794	7.19412	6.68114	7.78762	7.19066	7.41841	7.71965	7.47794	7.93215	7.06472	7.81905	7.24523	6.78303	7.38594	7.57595	6.69087	7.1848	7.16084	7.22067	7.2884	7.15658	6.59785	7.59374	6.94801	7.48271	6.95742	7.0079	7.6936
CDC6	1.02519	8.31641e-06	5.50736e-05	6.36261	5.33742	6.25152	6.71384	5.90446	5.85936	6.57946	6.60542	5.88233	6.6098	6.1499	6.92651	5.97312	5.88668	5.4799	6.84112	6.40434	7.11207	6.90964	5.87968	6.71103	6.35982	5.8692	6.29613	5.87991	5.37656	6.58746	6.1062	6.77394	6.76064	6.55284	5.92466	6.30111	5.60456	5.95954	5.31244	5.71947	5.42688	5.95521	5.63233	5.94345	5.43915	5.79668	6.73926	5.98641	6.94956
CDC7	1.12293	0.00023527	0.00104952	8.4874	7.36447	8.31932	7.92122	7.94246	7.85746	8.53442	8.70357	8.54183	9.04423	8.58961	9.98673	8.94428	7.54369	6.30331	9.57542	8.27499	10.0993	9.45298	7.43288	8.80292	9.09284	7.41194	8.56789	7.87036	7.09389	8.47423	9.29893	10.1614	8.27587	7.87234	7.68087	9.21358	7.19511	8.67952	6.5102	8.6101	7.60214	8.60286	7.31978	9.2951	7.0861	8.57744	8.62899	8.67209	9.03009
CDCA2	0.950726	0.000945191	0.00345518	9.4363	8.48557	9.65494	9.59856	10.0804	8.95063	9.83464	9.67605	9.25122	9.96958	10.1529	8.80887	9.85532	9.89033	9.73308	9.08994	9.87707	9.22734	10.0899	10.2047	9.37838	9.83524	10.1647	9.82464	9.92017	9.85365	9.72314	9.09101	9.36104	9.00983	8.81853	9.42655	9.67983	9.06701	9.92712	10.1417	10.166	10.2278	9.92017	10.0146	9.8827	10.2472	10.6387	10.5674	8.11156	8.6682
CDCA3	0.96486	2.0434e-05	0.000124145	9.26301	8.29815	9.21755	9.25675	9.65254	9.07048	9.19369	9.22165	8.79981	9.73407	9.75066	8.6936	9.29574	8.95945	8.65386	9.10846	9.04204	9.15431	9.32563	9.81046	8.95574	9.43249	9.20706	9.65826	9.52358	9.03682	9.79033	9.25536	9.82016	8.74555	8.10501	9.44596	9.02799	8.6696	9.15205	9.3122	9.75335	9.73407	9.17087	9.20344	10.1003	9.36538	9.67062	9.73355	8.65226	9.41771
CDCA4	0.760102	6.79216e-09	8.90713e-08	8.80949	8.04939	8.53588	8.52677	8.88272	9.06701	8.90878	9.17087	9.18632	9.09249	8.17806	8.94691	8.46898	8.46336	8.35472	8.87489	8.46615	8.63954	9.37732	9.03871	8.45372	8.77646	8.55646	8.94722	9.48196	8.72581	8.40339	9.17451	9.12385	8.48274	8.51162	9.09846	9.07481	8.54958	8.24359	8.3298	9.03283	9.17364	8.78929	8.71826	8.36562	8.63675	9.28545	9.18899	9.28731	8.81554
CDCA5	1.94516	1.3025e-11	2.89895e-10	8.39327	6.44811	8.39509	8.41244	7.82672	8.05059	8.86372	8.10054	8.13388	9.23914	8.68384	9.42453	8.32612	7.45619	6.75284	8.14446	8.19575	8.70544	8.53655	7.96832	7.83328	8.54044	6.97118	8.4802	8.966	6.59848	8.32134	8.58422	9.4486	9.09029	8.48255	8.31692	8.55847	7.31855	8.34703	6.7876	8.09932	7.58305	8.31556	7.81871	7.95723	7.61883	8.23897	8.22196	8.64667	8.87489
CDCA7	1.46248	1.33413e-08	1.64466e-07	7.48559	6.02311	7.66069	7.92916	7.24865	7.75496	7.21073	7.86973	8.68886	7.09423	7.70551	8.34019	7.63444	7.37421	6.85504	7.74024	6.83033	8.02237	7.9872	6.78364	7.79925	7.47892	6.85959	7.02769	7.42489	6.14969	7.97265	6.9372	7.46898	7.6677	7.24523	7.79759	7.33005	6.94899	6.00497	6.34746	7.9559	6.79133	7.00651	6.69616	7.54962	6.40807	7.01287	6.83421	7.76169	7.47932
CDCA8	0.90377	1.4491e-05	9.10114e-05	8.54625	7.64248	8.49659	8.34492	7.9568	8.30591	9.17013	8.54468	8.52677	9.17861	8.90328	9.14977	8.77855	8.09314	7.78679	8.95263	7.88426	8.96254	8.59452	8.30035	8.79912	8.56622	7.70592	7.90349	8.30381	7.64488	9.52813	8.76667	8.84377	8.43774	7.14553	8.0079	8.79761	8.35705	8.12954	7.56667	8.01076	7.77238	8.62365	8.07515	8.85999	8.15932	8.18694	8.78449	8.5421	10.8375
CDH12	1.03917	0.00609692	0.0166704	5.62626	4.58709	7.22834	7.52662	4.90319	6.7941	5.41021	5.02685	5.02469	5.94491	5.37621	4.62292	4.88056	4.81463	4.68886	4.56335	6.33783	6.20136	4.89554	5.26991	4.66925	5.43749	5.30122	5.5717	8.04994	7.4024	6.22497	4.93311	4.91413	5.46021	5.73729	4.80119	4.85549	4.71571	6.10557	5.04655	8.48666	5.02854	4.14496	4.57506	7.24448	5.22209	4.71138	5.38959	4.47775	7.66482
CDH19	0.728666	0.0236315	0.0502687	7.98745	7.25878	8.5967	8.62874	8.67385	8.22503	8.58757	8.23919	8.16418	8.64296	8.81131	7.91215	8.48666	8.61035	8.32791	8.24251	8.47683	8.14669	8.61058	8.74589	8.3463	8.99462	9.30555	9.30882	9.09167	8.79734	8.77341	8.12203	8.56695	8.18006	5.03728	8.46521	8.06542	7.68125	7.93174	7.87936	7.98385	7.74184	7.78062	8.08996	7.89568	7.9801	8.14963	7.8178	6.88169	7.16681
CDH6	1.39777	5.81056e-07	5.07619e-06	9.42628	8.02851	9.48645	9.26661	10.2091	9.23696	9.50752	9.52977	8.95656	9.30593	9.23438	9.06726	10.1248	10.0033	9.34899	9.46684	9.75622	9.89815	10.0682	9.58775	9.48542	10.1235	10.1471	9.8808	10.2644	9.66266	10.0135	9.0213	9.0537	9.03262	7.07381	9.8707	9.26142	9.35707	9.5314	10.2992	9.8033	10.2865	9.6087	9.64888	9.94257	9.59897	9.92712	9.69063	7.72391	8.61882
CDK1	1.57679	1.72883e-10	3.14369e-09	9.8349	8.25812	9.6295	9.95297	9.76205	8.8043	10.3331	9.80679	9.53183	9.89207	9.73019	9.54273	9.89413	9.58446	9.6368	9.80475	9.75733	9.89266	10.0562	9.97317	11.9495	9.67117	9.62636	9.72916	10.2029	9.70766	9.72218	9.86981	10.0241	9.43037	8.37344	9.92892	9.93805	8.58232	9.92129	9.91561	9.90551	10.4154	10.0416	9.84238	10.4707	10.1634	10.6499	10.0336	9.66921	9.83014
CDK15	0.639674	0.0485393	0.0894907	8.72181	8.08214	8.95118	8.96035	9.65826	8.36103	9.23014	9.05519	8.55998	9.33111	9.37615	8.58468	8.97937	9.27152	9.01786	8.48781	9.17772	8.68159	9.4824	9.68877	8.86727	9.24726	9.48942	9.25216	9.5882	9.59624	9.15165	8.76208	8.74531	8.20724	5.755	9.14494	9.15328	8.65772	9.29423	9.64512	9.43639	9.84937	9.17844	9.31057	9.38697	9.43755	9.68455	9.55093	7.3643	7.86789
CDK16	0.632649	1.73745e-05	0.000107469	8.61352	7.98087	8.60259	8.38754	8.6645	8.6404	8.29324	8.40208	8.53178	8.71597	8.71144	7.96768	8.55452	8.20098	8.18006	8.36427	8.10632	8.13934	8.47813	8.43548	8.21762	8.93948	8.55948	8.59264	8.85143	8.26251	8.33906	8.90052	8.45119	9.17679	8.89352	8.60571	8.39406	8.39046	8.05634	8.59604	8.22981	8.69717	8.59527	8.2519	8.38838	9.00251	8.5316	8.66795	8.93534	8.57367
CDK2AP2	0.637648	0.00172777	0.00577099	9.07108	8.43343	9.58719	9.32462	9.41017	9.45264	9.31803	8.93703	8.61088	9.57794	9.46768	8.35451	9.06298	9.21428	8.98336	8.86884	9.26266	8.64613	9.11573	9.72867	8.92169	9.53938	9.10535	9.12155	9.38169	9.49741	9.28168	8.17524	8.89352	8.20343	6.89801	9.06087	8.9389	8.89905	9.42537	9.42993	9.47569	9.90957	9.87766	9.54208	9.59212	9.81339	9.72639	9.18999	8.63171	9.32839
CDKN3	1.32265	1.23116e-06	1.00174e-05	7.30936	5.98672	6.92216	7.4795	7.31995	6.38125	8.27702	7.46286	7.80845	9.09284	7.65868	6.92313	7.01835	6.06243	5.72484	7.24311	6.46776	6.70902	7.30863	7.4461	6.35504	7.19213	6.17644	6.66062	7.85578	6.54825	7.63192	7.49251	7.83343	7.24634	6.79804	7.76627	7.58262	6.23007	6.61357	6.29591	6.79895	6.24409	7.9094	6.73757	7.22878	6.60621	7.25855	6.79447	7.65908	8.17264
CDSN	0.724226	0.00228758	0.00733666	8.32139	7.59716	7.94227	8.48081	8.7186	7.64149	8.66692	8.57304	8.04781	8.56375	8.49504	8.07666	8.1919	8.32134	8.66886	8.31776	8.12078	8.2795	8.47747	8.63069	8.20706	8.61249	8.74359	8.90907	8.53875	8.75035	8.67334	8.41773	8.6751	8.45941	6.69464	8.79262	8.81993	7.48756	8.80052	9.16463	8.96349	9.31925	8.68187	8.95292	8.65004	8.77625	8.84461	9.23307	7.49581	8.60642
CDT1	1.11734	0.00434054	0.0125353	10.1642	9.0469	10.4662	10.8147	10.9855	10.0768	10.8754	10.5818	9.73785	10.8289	11.3047	9.74291	10.651	10.9146	10.0952	9.74236	10.6266	9.77411	11.5801	11.2898	10.2271	10.9335	11.594	10.2982	10.9524	11.0954	10.6141	9.5863	9.8058	9.43338	6.71062	10.2629	10.1449	9.39883	10.5096	10.886	10.9474	10.7341	10.4946	10.7176	10.697	10.8717	11.7211	11.3983	8.90052	9.82521
CDY1	0.651138	7.54344e-06	5.05696e-05	5.95655	5.30541	5.67581	5.9009	6.78247	6.21756	5.67862	5.88993	5.67553	5.6983	6.02988	5.73179	6.03362	5.88394	6.78583	5.99847	5.78638	5.91021	6.32786	5.98082	5.94765	6.18866	6.63772	5.74344	7.51815	6.4066	6.22363	5.90133	5.87313	5.75581	5.77562	5.96515	5.54631	5.94253	6.09742	6.26756	5.88461	6.23994	5.99458	6.0946	6.01449	5.78586	6.17751	6.41548	5.4311	5.55444
CEACAM19	0.938815	0.0349594	0.0688712	10.1295	9.19069	9.81771	10.6338	11.2249	8.50717	10.6239	10.5882	9.73454	10.6828	10.8938	8.97937	10.7587	10.7682	10.8243	10.0658	10.6806	10.196	11.2432	10.7267	10.2739	10.923	11.4319	10.8111	11.2047	11.1532	10.9095	10.16	10.3128	9.63478	6.89651	10.6118	10.7473	8.59862	10.9512	11.3939	11.0841	11.5258	10.8554	11.3158	11.2618	11.4319	11.5652	11.5284	8.51315	9.35673
CEBPA	0.674695	0.00515333	0.0144797	9.40758	8.73288	9.91803	9.76988	10.1573	10.0546	9.71052	9.57752	8.891	10.2259	10.0982	9.07259	9.78582	9.70937	9.48463	9.01877	9.50547	9.01877	9.86317	10.1547	9.48128	9.78325	9.914	9.66968	9.73167	9.96958	9.57923	8.99819	9.42154	9.08967	7.71049	9.27116	9.36927	9.73019	9.73728	9.95382	10.0525	9.81339	9.75267	10.0152	9.57626	10.1535	10.2608	10.1398	8.46667	8.99241
CEBPA-AS1	1.84208	6.65527e-07	5.73963e-06	10.8975	9.05541	10.5999	11.3316	11.8756	9.4233	11.4611	11.2919	10.6691	11.3564	11.811	9.87666	11.4115	11.5105	11.1243	10.5518	11.3939	10.9134	12.1488	11.5652	10.9766	11.6444	12.2831	11.6096	11.8783	11.7263	11.6072	10.616	10.9629	10.2113	8.94752	11.5801	11.37	9.38141	11.5652	11.9747	11.7419	11.8495	11.0937	12.0147	11.7762	11.7419	12.2432	12.2081	9.60909	10.3828
CEBPG	0.867404	0.000219183	0.000985439	8.34257	7.47517	7.51014	9.15368	7.96952	8.24567	8.14385	7.85973	8.66094	9.46363	8.83778	8.45161	9.53654	8.61547	7.63007	8.84461	8.35048	8.31969	8.05083	7.33557	8.20032	7.96334	6.97258	8.16551	8.15883	7.56823	8.27136	7.51509	8.46228	7.96952	8.79223	7.72623	8.4802	8.58737	8.05673	9.58874	7.64167	6.84166	7.12709	7.58754	9.47772	8.97327	7.68284	8.40973	8.42144	9.39676
CELA1	0.678419	6.3768e-08	6.77664e-07	7.31241	6.63399	7.16366	6.99754	7.01166	7.07908	7.1697	7.11284	7.38665	7.15119	7.09485	7.47325	7.21387	7.27668	7.35979	7.44738	7.32015	7.23458	7.30341	7.56395	7.16612	6.98553	7.21476	7.42292	7.2375	7.47507	7.09556	6.96844	7.31546	7.16833	5.55949	7.235	7.87194	7.57153	7.46504	7.75538	7.34998	7.67603	7.10251	7.43705	7.06723	7.28709	7.25286	7.19123	7.71873	7.46898
CELF3	1.76081	2.03831e-08	2.4252e-07	9.02609	7.26528	8.59452	9.43037	9.78927	6.83994	9.29245	9.35823	8.90527	9.37355	9.53437	8.16882	9.30031	9.22438	9.30882	8.84083	9.31925	9.06787	9.4742	9.36649	9.12903	9.70475	9.89867	9.27885	9.73934	9.94431	9.77926	8.70311	9.15205	8.49546	6.78011	9.32563	9.40514	6.79214	9.62853	10.0169	9.76713	10.0452	9.30846	10.0688	9.90904	9.91092	10.0824	10.2598	8.1352	9.11717
CELP	0.601647	0.00762838	0.0200572	7.44755	6.8459	7.53406	7.48736	8.13603	7.74318	7.64205	7.55064	7.04105	7.57481	8.05237	7.17007	7.687	7.90373	7.33466	6.9822	7.82985	7.14904	8.24756	8.30011	7.30736	7.66338	8.20763	7.71489	8.04033	7.95783	7.93318	7.15159	7.14501	6.61378	6.85799	7.53749	7.23381	7.36787	7.70448	8.14048	7.69618	8.74359	7.80077	7.80862	7.73503	7.66617	8.66692	8.58043	6.77565	6.40999
CELSR2	0.77833	0.000267001	0.00116918	9.18405	8.40572	9.51861	7.33164	8.73263	9.94312	8.98769	9.35181	9.90797	9.55221	8.99819	10.039	9.39123	9.39377	9.59131	9.41132	8.98676	9.16424	9.16136	8.78373	9.42959	9.19546	9.23725	8.9338	8.38329	9.01509	9.83524	8.9389	8.85857	9.31803	10.201	9.72442	8.66036	9.245	8.11218	8.82024	8.85143	7.44852	9.60953	9.08612	9.77711	9.98887	8.17693	8.93948	9.57718	9.50547
CELSR3-AS1	1.07772	0.0212005	0.0460303	7.86599	6.78827	7.69274	8.61547	9.40981	5.71103	8.67898	8.75118	7.45444	8.50374	8.82024	6.21908	8.84742	9.00655	8.26143	7.90857	8.60381	7.72337	9.43684	8.7971	7.95373	9.13185	9.36734	8.66251	9.48942	8.87946	8.79311	7.98304	8.65059	7.90652	2.2981	8.63649	8.56717	6.467	8.6936	9.09706	8.78425	9.15463	8.20826	9.11287	9.10093	8.7963	9.19944	9.05707	6.226	6.04683
CEMIP	1.09924	3.40881e-06	2.48071e-05	9.01645	7.91721	9.26885	8.98231	9.13421	9.44806	9.04204	9.62282	9.08932	9.01006	9.93115	9.24095	8.95574	9.15095	8.97291	8.66666	9.24568	8.97386	9.12185	9.96618	9.38253	9.16735	9.1719	9.06787	9.15402	9.28206	9.09585	8.29834	8.7693	9.53437	8.10848	8.82777	8.88159	9.11224	9.22942	9.39994	9.72967	10.0462	9.40981	9.55771	9.30632	9.50193	9.90226	9.54787	8.12862	8.39112
CENPA	1.08469	2.98085e-07	2.75786e-06	8.45952	7.37483	8.80522	8.73789	8.35836	8.0304	9.00497	8.34542	8.6019	9.53437	8.9356	8.94347	8.68636	8.09932	7.6705	8.43405	7.69681	9.22775	8.5512	7.91854	8.06463	8.5882	6.89921	8.07143	8.5421	7.4798	8.68216	8.26678	9.1882	8.6778	7.49444	8.16282	8.5166	7.87214	7.95887	7.50307	7.87011	7.74633	8.71515	8.15416	8.23293	7.63088	8.38914	8.71882	8.61155	9.30555
CENPE	1.42907	3.27306e-10	5.63488e-09	7.98612	6.55706	7.48153	7.81761	8.5325	7.43438	8.14589	8.32378	7.55177	8.37175	8.08335	7.49402	8.24076	7.9264	7.88948	7.90024	7.94536	7.6088	8.29766	8.50653	7.44941	7.9179	8.31207	8.01483	8.1767	7.95331	8.43754	7.7635	8.11798	7.40876	5.61475	8.04481	7.65887	8.19442	8.39946	8.86701	8.54832	8.95263	8.56488	8.16361	8.5711	8.27655	9.29423	8.97551	6.68995	7.88619
CENPF	2.03897	7.42576e-14	2.56649e-12	9.46502	7.42605	9.36649	9.62591	9.44174	8.84507	9.84179	9.37261	9.00369	9.83123	9.32263	10.327	9.82973	9.04549	8.38936	9.90551	8.36319	10.5818	9.21358	9.38697	9.05948	9.89413	7.99083	9.44136	9.45582	8.43728	9.96148	10.206	10.5315	8.30884	8.34019	9.32152	9.25455	8.79146	9.49741	8.85171	9.50584	9.28168	9.06851	9.27708	9.82918	9.45915	9.73632	9.68499	9.06268	9.86232
CENPH	0.8777	0.000536973	0.00213668	8.26144	7.38374	8.34715	8.27114	8.58422	7.19341	8.48201	8.59741	7.90695	8.652	8.56862	7.5004	8.27655	8.39801	8.82298	8.00749	8.37887	8.45451	8.80915	8.67635	8.0126	8.69481	8.51756	8.60259	8.63721	8.9865	8.84864	8.49092	8.30417	7.87317	6.6224	8.31969	8.33928	6.65578	8.68583	8.93456	8.72937	9.11854	8.54688	8.63026	8.77625	8.78039	9.39917	8.75787	7.66533	8.1546
CENPK	1.99891	1.65083e-09	2.45745e-08	7.94582	5.94691	7.25534	7.66733	7.04269	6.66315	7.76664	8.04809	8.21507	8.10324	7.53287	8.76769	7.52087	7.41253	7.62092	8.7788	8.05614	8.78039	7.98103	7.94747	8.23083	7.92018	6.25887	7.38494	7.4193	7.46268	6.86242	7.83025	8.87093	7.2783	7.9341	7.85077	9.00223	6.34281	8.27858	6.09317	8.18028	8.00288	7.22088	6.91392	8.53011	6.75629	8.54017	6.65704	8.8786	7.83946
CENPM	1.69991	1.2704e-09	1.93908e-08	8.12292	6.42301	8.387	8.59236	7.27963	7.73912	8.31969	8.00868	7.41123	9.26371	7.9568	8.02319	7.16628	7.16366	8.01184	8.804	7.67714	8.24863	7.96724	8.83244	6.97814	8.11591	7.44066	7.83419	8.2438	6.65847	8.31932	8.0878	9.01196	7.71201	8.23718	8.5286	7.82288	7.18123	8.64517	6.25979	7.48999	8.98133	7.80642	7.74867	9.27851	7.30305	7.55885	7.66942	8.04955	9.07979
CENPN	1.08204	0.00042967	0.00175614	8.84175	7.7597	8.66147	9.17844	9.49312	8.03753	9.58585	9.1849	8.5421	9.18563	9.50031	8.26719	9.14292	9.26226	8.93613	8.75256	9.14104	8.81026	9.67327	9.49055	8.934	8.99393	9.76526	9.18378	9.57718	9.16676	9.3185	8.76575	8.93673	8.38108	7.10713	9.24969	8.99067	7.99484	9.23472	9.57996	9.2588	9.59374	9.08018	9.45658	9.17013	9.19814	9.91627	9.55857	7.46986	8.39072
CENPO	1.41629	8.69455e-16	4.34348e-14	7.91183	6.49554	7.95007	7.89946	8.3443	7.0609	8.49486	7.98617	7.84017	8.53773	8.16598	7.72371	8.23005	7.99917	7.76466	7.71985	8.13831	8.24526	8.2001	8.50741	7.8565	8.19918	7.86647	8.17894	8.25399	8.1767	8.0779	8.39737	8.26119	8.14897	6.8422	8.23083	8.17967	7.19973	8.07619	8.07666	7.95783	8.28295	8.05573	7.73929	8.06905	8.24635	8.13265	7.97743	7.39296	7.61883
CENPU	1.11105	1.49568e-09	2.24253e-08	8.64006	7.52901	8.61641	8.37283	9.03052	6.89151	8.90973	8.75005	8.8046	9.1698	8.61913	8.46034	8.63936	8.34871	8.11572	8.58961	8.16649	8.75661	9.13968	8.42376	8.62284	8.79364	8.0658	8.86786	9.06673	8.40163	8.80386	8.24612	9.3323	8.29747	7.98245	8.90558	9.01575	8.52428	8.99975	8.25704	8.62212	8.59208	8.1644	8.64094	8.811	8.50269	8.72415	8.30957	8.04436	8.76849
CENPW	0.989815	0.00405162	0.0118498	11.0708	10.0809	10.6952	11.4611	11.8015	10.2321	11.6154	11.4468	10.4607	11.478	11.7762	10.8027	11.3544	11.4864	11.2468	10.6182	11.2231	10.8067	11.8819	11.5801	10.9071	11.5674	12.0514	11.5674	11.9384	11.6756	11.6188	10.7771	11.0966	10.4483	8.4552	11.3395	11.2678	9.94491	11.6695	11.8868	11.7302	11.9539	11.5652	11.9539	11.8929	12.1127	12.3374	12.1978	9.45338	10.9654
CEP170B	0.963605	2.39805e-07	2.2635e-06	9.06531	8.10171	9.23165	9.2223	8.88909	10.1255	9.38395	8.36367	10.1458	9.37222	8.74677	10.2372	8.86533	8.85171	9.1504	8.91754	9.10752	8.64847	8.88825	8.93797	9.19677	8.88119	8.44808	9.40024	9.02067	8.48302	8.81357	8.77671	8.69873	9.16172	9.74148	9.07048	8.66525	9.1941	8.35137	7.93155	8.5779	7.77981	9.49429	8.67927	8.62447	9.77975	8.56078	9.04368	9.38351	9.16634
CEP55	2.74177	5.97967e-12	1.41537e-10	9.21105	6.46929	9.53938	9.1694	8.65059	8.79935	10.2644	9.44436	9.71868	9.86981	9.78709	10.6327	8.30747	9.34482	6.83782	10.5492	9.24458	9.83415	9.78823	9.72359	8.44728	9.42295	6.81732	8.79496	9.88216	6.40829	10.3285	10.1512	9.69724	9.63359	8.61134	9.69822	8.39322	6.41914	9.19278	7.65457	9.02438	8.6941	8.96035	8.93825	9.95751	8.72227	10.0309	9.7578	9.1866	10.0938
CEP72	0.66444	3.73062e-07	3.38716e-06	7.78169	7.11724	7.80662	7.70448	7.98506	7.48197	7.8212	8.02005	7.48699	7.58809	7.75118	7.35279	7.84056	7.86406	7.56528	7.82719	8.09078	7.8413	8.22503	7.83265	8.07259	7.9341	8.17967	7.81008	8.46643	8.5222	7.82779	7.75792	7.44852	7.47831	8.02217	7.98324	8.00848	7.70316	7.24523	8.13093	7.33781	8.05594	7.61547	7.52556	7.39083	7.25959	7.91614	7.8221	7.8893	7.23594
CERS2	0.89316	0.000619514	0.00240899	11.5794	10.6862	12.0201	11.8868	12.3036	12.0929	12.3312	11.8996	11.6293	12.2662	12.5101	11.2249	12.2028	12.3036	11.6636	11.19	12.2312	11.6444	12.4951	12.6724	12.0775	11.9789	12.1536	12.0027	11.853	12.0027	11.9346	11.3138	11.4487	11.0448	9.53327	11.7331	11.6695	11.5962	11.7888	11.7211	11.8616	11.7177	11.9422	11.8211	11.7558	11.7263	12.1536	11.8312	10.5809	11.0816
CETN1	1.05536	0.000769865	0.00290668	8.81449	7.75912	8.63001	8.94722	9.52167	8.67874	9.18961	9.04934	8.33411	9.00341	9.53519	8.44134	8.69585	9.11224	8.83009	9.52813	8.76747	8.61272	9.64618	9.53769	8.48255	9.06851	9.58676	9.0131	9.544	9.32721	9.11954	8.61697	9.17679	8.25098	7.07885	9.26964	9.23307	8.39604	9.38926	10.1973	10.3984	10.1309	9.39377	9.36063	10.0163	9.54695	9.80437	9.7399	7.66633	8.02217
CFTR	0.898331	0.000416837	0.00171133	7.54032	6.64199	7.39882	7.85634	7.93479	6.76705	8.40317	7.78637	7.70429	8.06463	7.89425	8.3245	7.76032	7.87011	7.54462	7.40613	9.21689	7.63461	7.65646	8.37463	7.77944	7.86647	7.93606	7.71631	7.76426	7.65207	7.6123	7.71736	7.69785	7.03769	6.07381	7.63728	7.70395	5.38364	8.02917	7.70145	7.98569	7.52639	7.7942	7.77238	7.53592	7.91067	7.62588	7.67379	6.35219	7.1965
CHAC2	0.947097	5.79339e-06	3.97817e-05	7.96477	7.01767	7.53422	8.03565	8.51162	7.48715	8.08378	7.92578	7.63864	8.20805	8.3029	7.87058	8.35493	7.6088	8.06358	7.85952	7.40392	7.78718	8.54598	8.10616	7.56555	8.1667	8.7598	8.16382	8.50926	8.26002	7.68505	7.7377	8.07913	7.73656	6.22313	7.55657	8.1428	7.26982	7.70527	8.45261	8.67734	8.61035	7.61763	8.13876	7.93756	7.68963	8.67385	9.02647	7.39742	7.80377
CHAD	0.742088	7.63899e-10	1.21968e-08	7.96436	7.22227	7.86897	7.53308	8.26402	7.99688	8.04238	7.83805	7.96334	7.94872	7.70689	8.13093	7.85077	8.19557	8.30139	8.15096	7.88824	8.2105	7.7845	8.08295	7.88908	8.25781	7.8147	7.74085	8.40043	8.17264	8.16282	7.82799	7.98977	7.98263	8.67658	8.09932	7.89801	7.47874	7.57521	8.34406	8.09394	8.87239	7.44266	7.69129	8.09138	8.16632	8.53773	7.2717	7.96652	7.72818
CHCHD10	0.957734	0.000128145	0.000618558	8.74811	7.79038	8.6067	10.488	9.1154	9.47454	7.74024	7.78979	8.49607	9.19248	8.92433	8.63048	7.11714	8.22705	8.62772	8.53542	9.29394	7.78187	8.18611	10.4466	7.66282	8.36129	8.59935	8.77391	8.14094	9.42993	9.18933	8.06522	7.56856	10.0303	10.1553	9.37546	8.03983	8.97698	9.04146	8.8526	8.71487	8.38233	9.60151	8.44255	7.62778	8.81357	8.57143	7.60448	9.30733	8.94625
CHD7	0.834717	3.28508e-05	0.000188898	8.22046	7.38574	7.92226	8.02851	7.47188	8.33975	7.88542	7.73967	7.53786	8.46972	8.29662	8.8244	8.8292	8.56622	7.5785	9.22196	7.74434	9.52167	7.80823	8.2804	8.66282	7.74204	7.86081	8.26784	7.97724	8.66886	8.13767	7.76853	8.4969	8.6552	8.95345	7.9744	7.77808	8.18314	7.78204	6.9983	9.11854	7.41987	7.86308	7.94704	8.1398	8.33906	8.30706	7.84173	8.10193	7.88137
CHKA	0.68339	4.66017e-07	4.14976e-06	8.25685	7.57347	8.42074	8.74977	7.98201	8.50873	8.17054	7.78	8.06399	8.34871	8.56789	8.57906	8.20098	8.25555	7.75093	7.81432	8.69086	8.21677	7.99269	8.82241	8.12993	8.39578	8.0779	8.21461	8.15395	7.85805	8.08356	7.7787	8.39046	8.16807	8.83329	8.31207	8.36214	8.50003	8.33458	8.45009	8.14713	7.64182	8.05634	8.14446	8.14506	8.86621	8.50793	8.43548	8.42841	7.98635
CHL1-AS1	0.642642	0.00439996	0.0126848	5.98024	5.3376	5.64661	5.63398	5.64225	5.83582	5.9793	5.76635	6.39637	6.03057	5.94694	6.198	6.03849	5.77442	5.79004	6.13245	5.57404	6.0079	5.5565	5.61748	6.19655	5.77081	5.78825	5.98109	6.78247	5.98756	6.20157	6.21924	6.10936	6.22271	10.2559	6.12482	7.12057	6.32103	5.87313	5.35529	5.55053	5.55193	5.98109	5.86942	6.03297	6.31346	5.32233	5.89516	5.76712	5.74366
CHML	0.6059	0.0313034	0.063097	6.94087	6.33497	6.98182	6.51653	6.85267	6.88483	6.94956	7.1382	6.35365	5.7928	6.86222	7.63672	7.59411	6.72007	7.17566	7.57428	7.22553	8.35878	7.16929	5.94035	7.71315	7.15119	6.18971	6.13862	5.86429	6.51356	5.49572	5.514	7.31978	7.50365	7.44127	5.45026	5.66107	8.33715	6.469	5.59685	7.20649	5.64902	6.48486	6.62991	7.59837	6.11885	6.90372	5.54494	7.07457	8.0019
CHMP1B	0.830464	0.0138362	0.0325124	9.7274	8.89693	9.4673	10.0169	10.4986	8.97386	10.0033	10.3232	9.52131	9.99698	10.2701	9.37615	10.0975	10.1687	10.1787	9.95434	10.0354	9.7676	10.545	10.4022	9.62365	10.1694	10.6618	10.3232	10.4697	10.3539	10.2865	9.87927	10.2364	9.30519	7.53901	10.514	10.6662	8.94428	10.4013	10.6439	10.4	10.7556	10.1981	10.6266	10.4566	10.4082	10.5695	10.7875	8.43241	8.93534
CHMP4C	1.14281	8.37547e-05	0.0004288	9.38376	8.24095	9.31139	9.36171	9.39246	9.49694	9.14104	9.64044	9.02034	10.0179	7.78187	9.76813	8.34564	10.2672	9.40481	10.1762	9.7937	9.79082	10.2378	9.29679	9.01483	8.77415	9.9499	8.6691	8.99148	9.07048	9.11124	8.67898	8.50816	9.17584	8.89956	9.73538	8.3703	9.43286	9.43639	8.90649	8.46856	9.12733	9.914	9.79232	9.44938	9.53613	8.73555	9.32189	9.72314	9.30917
CHODL	0.661118	0.00158124	0.00535665	9.66033	8.99921	9.22775	10.0397	9.76468	9.95088	9.9207	9.99187	9.67327	9.53095	10.196	9.27483	9.81046	10.2928	9.64838	10.1068	9.87766	9.47105	10.0229	10.0457	9.80732	9.59084	10.4111	10.4368	9.64365	9.64174	9.81184	9.84937	9.70284	9.72488	8.08663	10.3331	10.2286	9.78927	10.1417	10.2343	10.0273	9.92129	10.0993	9.914	9.62853	9.81046	10.1363	10.382	8.95977	8.8233
CHRAC1	1.1533	3.19643e-06	2.34058e-05	9.31385	8.16055	9.61005	9.2921	9.18961	10.0432	7.78925	9.16676	10.545	9.55534	9.12994	9.1698	8.23697	9.59624	8.64326	10.0247	9.13382	9.43974	9.04397	8.95345	9.53263	9.64984	8.92433	8.87347	9.20706	9.7837	9.21654	10.1062	9.89471	10.0119	9.1006	8.58491	8.81164	10.9965	9.20235	7.71103	7.50265	8.60571	9.30031	8.74703	9.05583	8.92079	8.53371	8.63473	9.42537	9.82863
CHRM5	0.596213	0.013558	0.0319749	7.70989	7.11368	7.47347	8.01421	8.21846	7.06068	8.04955	8.05718	7.54052	7.97051	8.30839	7.09045	7.66005	7.71007	7.79925	7.89402	7.84978	7.63234	8.33	8.0467	7.5663	8.07954	8.56741	8.14202	8.73789	7.92365	8.25658	7.46046	7.56647	7.51701	6.85977	8.04276	8.24719	7.28768	7.76232	8.31582	7.98449	8.30794	7.93864	8.27325	8.16161	8.88442	8.52169	8.09277	6.45369	6.97039
CHRNA1	0.850006	0.0159317	0.0364809	7.29867	6.44866	7.0216	7.80899	8.05757	6.29376	7.79607	7.97619	7.47285	8.0011	7.99439	6.91303	7.54034	7.6793	7.54907	7.49149	7.49881	6.80346	8.13915	8.30932	7.30422	7.94479	7.98635	7.89466	8.247	8.04809	7.68125	7.27315	7.51488	8.06619	6.71001	7.48017	7.75948	6.01791	7.913	8.3443	7.99307	8.04502	7.13481	7.90992	7.87503	7.74965	8.22917	8.62313	5.14202	6.40172
CHRNA2	1.51206	5.24004e-10	8.62534e-09	9.04157	7.5295	8.95625	9.10785	9.8058	8.67334	9.43974	9.42496	8.99819	9.26332	9.5373	9.08439	9.36063	9.68796	9.23472	9.38541	9.38311	9.05707	9.69339	9.86381	9.13905	9.44239	9.58545	9.42832	9.73687	9.5182	9.16294	9.01759	9.33742	8.6568	8.19831	9.32071	9.52743	8.72166	9.28278	9.71577	9.2515	9.78653	9.07193	9.23814	9.64365	9.45504	9.80629	9.30031	8.07619	8.09182
CHRNB4	0.706186	0.00208739	0.00678499	6.06587	5.35968	5.77966	5.95116	6.1644	5.63696	6.22117	5.76809	6.62334	5.88438	6.2307	5.11854	5.79302	6.15501	6.37533	6.21026	6.19932	5.88312	6.5282	6.79093	6.06115	5.5786	6.6463	6.98695	7.72461	6.44465	6.3351	5.79991	5.80739	6.22382	6.61858	6.50426	7.09045	5.22625	6.83872	7.3257	7.24649	6.31454	6.16286	6.24858	6.48543	6.07168	6.50799	6.90631	5.04497	5.05054
CHST14	1.70805	1.2333e-18	1.049e-16	9.39688	7.68883	9.44012	9.35181	9.40744	9.507	9.57061	9.59465	9.87666	9.32311	9.21796	9.31021	9.5882	9.68033	9.51088	9.86071	9.69063	9.40554	9.28695	9.57923	9.93693	9.6111	9.64459	9.70639	9.48036	9.42573	9.5131	9.96551	9.78277	9.69289	7.60195	9.88528	9.74291	9.34217	9.48277	9.74344	9.71807	9.49097	9.29423	9.64512	9.4486	9.38311	9.22566	9.43864	8.86567	9.16063
CHST6	1.02269	0.000211246	0.000953881	7.71845	6.69576	8.2114	8.17826	8.00073	8.29521	7.66465	7.80237	7.93215	7.90922	8.56975	7.40656	7.65363	8.07007	8.02997	7.20378	8.1843	7.56507	8.11278	8.27281	7.66823	7.64993	8.14024	8.18589	8.05531	8.03676	8.14446	7.4072	7.24484	7.0287	6.31279	7.73378	7.50365	8.38936	8.38347	8.40357	8.46014	8.82187	8.09394	7.94849	8.64068	8.57187	8.53542	8.60286	6.75515	6.97368
CHSY1	0.778347	7.47019e-05	0.000388803	10.8544	10.076	11.2724	11.2525	11.3316	11.2414	10.8996	11.288	10.7885	11.1493	11.2973	11.0318	11.2343	11.2047	10.8742	11.0788	11.3736	10.8253	10.873	11.5284	11.0199	11.0299	10.9855	11.0816	11.024	11.2636	10.9081	10.4976	11.1633	10.615	9.92785	10.7955	10.9335	11.0448	10.7356	10.7198	11.1169	11.236	11.2861	11.1051	11.1377	11.1243	11.387	11.2798	9.67012	10.9808
CHTOP	1.60681	1.54278e-14	6.09651e-13	10.6768	9.06999	10.3961	10.6377	10.8787	10.18	10.7671	10.7782	10.4662	10.643	10.9372	10.2295	10.9299	10.8038	10.9202	10.2992	10.7542	10.7908	10.9629	10.8501	10.5864	11.0141	11.0816	10.9158	11.0402	11.1652	10.81	10.4509	10.736	10.0385	9.62013	10.8914	10.9122	9.85252	11.0729	11.236	11.1847	11.47	11.1345	11.3274	11.4115	11.372	11.4319	11.2822	10.309	10.5893
CIB1	1.44009	2.52457e-08	2.94255e-07	10.1939	8.75382	11.0982	10.1505	10.081	11.2028	10.4592	10.4774	10.5173	9.91686	10.615	9.8521	9.63586	9.75957	10.9615	11.3337	10.4368	9.66763	8.96996	10.1324	10.2959	9.80679	9.43833	9.73588	9.73538	9.60462	9.70728	11.1707	10.0462	10.9868	9.12482	10.9474	10.1715	10.62	9.98257	8.82187	9.97368	9.24896	10.0932	9.1914	10.0932	9.74344	8.57816	8.67712	10.7505	10.8512
CITED1	0.766486	9.933e-05	0.000494812	6.76964	6.00315	6.81948	6.88009	6.46679	6.84588	6.62396	6.68363	6.97247	6.90559	6.86318	6.84229	6.66025	6.75811	6.72322	7.07885	6.62847	6.98457	6.34528	6.63301	7.01356	6.574	6.30034	6.66432	6.43792	6.51065	6.5661	6.97118	6.8939	6.99795	5.52324	6.53407	6.54808	6.58746	6.55976	6.47952	6.56629	6.21637	6.65395	6.44573	6.40037	6.30939	6.3618	6.34337	7.47347	6.75729
CKAP2L	0.631163	0.00877097	0.0224962	9.00208	8.37092	9.18199	9.36139	9.56294	9.13286	9.16294	9.23785	8.85564	9.49694	9.38281	8.88093	9.20505	9.30368	9.08994	9.07014	9.28586	8.92254	9.47898	9.68744	9.10846	9.39757	9.56006	9.32462	9.65122	9.62802	9.32998	8.72581	9.31728	8.71274	6.45474	9.0576	8.98951	8.81968	9.24662	9.57354	9.45054	9.44596	9.49588	9.30404	9.40445	9.57261	9.83842	9.70009	7.91179	8.17054
CKB	0.937566	8.86089e-06	5.84089e-05	9.16663	8.22906	8.89788	9.11717	9.79617	10.085	9.1372	9.19331	7.78997	9.24969	9.59513	9.33452	9.11157	9.43131	9.05856	8.96502	9.05023	8.74865	9.67508	9.47569	8.77724	9.15266	9.28545	9.11824	9.97587	9.47257	9.54606	8.36116	9.48816	8.5105	9.99061	9.10414	8.82083	8.89956	9.30846	9.53183	9.76624	10.104	9.0939	9.26409	9.80821	10.0645	9.86271	9.45987	9.02561	8.64713
CKS1B	1.30832	7.36644e-09	9.59818e-08	10.2001	8.89182	10.1881	10.5096	9.98673	10.2313	10.4539	10.1484	9.86432	11.0154	10.2175	11.0169	10.3388	10.2717	9.89471	10.6886	10.3098	11.1295	10.1653	9.55957	10.2717	10.1793	9.11157	9.55814	9.71577	9.6139	10.214	9.88528	11.0652	10.3605	8.87517	9.97023	9.5373	9.89358	10.488	8.74433	9.42223	9.56918	10.2501	9.63278	9.78225	9.18933	9.88983	10.0002	10.5509	10.545
CKS2	2.12857	9.18317e-16	4.55772e-14	10.449	8.32046	10.6886	10.7542	10.2189	10.1229	10.6627	10.7101	10.1498	10.697	10.4192	10.3462	10.5232	9.47569	9.61441	10.4925	9.65301	10.4192	9.8788	10.186	9.07481	10.4592	9.78169	10.4006	10.4757	10.178	10.5749	10.9021	11.0921	10.3388	10.0599	10.1466	9.94199	10.4662	10.2303	9.03052	10.3804	9.70728	11.0702	9.90226	10.48	9.78225	10.1895	9.99187	10.8717	11.1295
CLASRP	1.00099	0.0132184	0.0313764	11.5882	10.5872	10.9629	11.9703	12.237	10.4493	11.8895	12.0246	11.4139	11.7153	12.435	10.6816	12.1181	12.123	12.0108	11.5512	12.1127	11.7056	12.7008	11.9539	11.6916	12.0514	12.9111	12.3598	12.4864	12.1594	12.2432	11.7525	11.5755	11.1566	9.9495	12.2142	12.4065	10.359	12.3517	12.86	12.3782	12.6923	11.9614	12.6923	12.4768	12.3713	12.807	12.9374	10.3557	11.0788
CLCA4	1.07225	2.62494e-11	5.57647e-10	5.23833	4.16608	5.78931	5.55154	5.45093	5.95378	5.47326	5.39642	5.21546	5.32668	5.72844	5.74082	5.62485	5.88044	5.20945	5.48402	5.47579	5.47739	5.60859	5.62485	5.49032	5.08623	5.48698	4.81882	5.15197	5.35687	5.09714	5.06293	5.19586	5.06144	5.43414	5.37549	4.96724	5.38069	5.07959	5.57497	5.38923	4.9442	5.21452	5.19919	5.23529	5.06647	5.71503	5.4226	5.07371	4.49307
CLCF1	0.744821	0.00702869	0.0187279	8.90358	8.15876	8.7175	8.96758	9.77873	8.13934	9.12665	9.15945	8.54566	9.32109	9.18342	8.43405	9.2663	9.37151	9.08699	8.59264	9.30812	8.39906	9.60684	9.7937	8.59086	9.49097	9.58139	9.19278	9.75376	9.67663	9.24095	8.71144	9.00251	8.40043	7.3354	8.99789	8.91005	8.1919	9.3441	9.8357	9.52897	10.349	9.44136	9.55617	9.98993	9.85742	9.85468	9.44136	8.00442	7.86629
CLCN4	0.716853	3.02575e-05	0.000175932	7.63212	6.91527	7.59108	7.79566	8.15003	7.02988	7.95841	8.00267	7.34465	7.85237	7.79518	7.23244	7.97329	7.79031	7.64723	7.47427	7.92762	7.71238	8.02706	8.03414	7.72818	7.94666	7.91345	7.84923	7.96791	8.04851	7.95887	7.75877	7.59661	7.47325	6.09435	7.76876	7.59878	7.26495	7.88445	8.34472	7.84549	8.2629	7.86161	8.02454	8.26272	8.08254	7.95932	7.92365	7.497	7.58093
CLDN10	1.65591	3.01422e-06	2.22182e-05	7.71743	6.06152	8.15863	8.21846	7.09125	8.89379	8.38531	8.92497	7.38934	8.33606	8.07598	7.46121	6.52513	8.68583	8.55625	7.12709	6.39046	7.78877	6.27183	8.4136	7.94054	8.04112	6.68976	6.79562	8.23233	6.19991	7.52783	8.88338	6.36926	9.69771	7.87364	8.09968	6.83001	8.44352	7.84322	6.32941	6.947	6.61628	9.44278	8.15003	7.15959	9.13185	6.68773	7.53362	6.58024	8.35627
CLDN16	0.733147	6.91388e-05	0.000363236	8.0291	7.29595	9.06238	7.71649	8.10118	8.48039	7.93137	8.63334	8.11474	9.1813	8.28462	9.1006	8.32494	8.52925	8.11299	9.62142	8.59312	8.00423	8.43892	8.12483	8.26162	7.78783	7.94261	8.20846	7.77114	7.73218	8.40532	7.55177	7.63585	8.02569	8.03941	7.33557	7.28551	8.02297	7.57758	7.16572	7.43008	7.53749	7.84804	8.03248	7.19847	7.59999	8.1841	8.46253	7.5557	7.48847
CLDN18	0.614076	7.57993e-12	1.75891e-10	6.16169	5.54762	6.24921	6.21376	5.9593	6.28019	6.22776	6.2201	6.48093	6.29504	6.2874	6.83493	6.20936	6.18692	6.15399	6.28619	6.30369	6.36451	5.99371	6.13075	6.25079	6.01519	6.13138	6.0979	5.96292	6.05755	6.01519	6.24498	6.07729	6.35826	5.86573	6.11688	6.06258	6.36204	6.04246	5.85936	6.103	5.73967	6.04598	5.96598	5.96467	6.05826	5.79108	6.45731	6.09409	6.10107
CLDN19	0.969994	1.65796e-09	2.46486e-08	8.92223	7.95223	9.04337	8.91966	8.9552	9.07683	9.00439	9.13482	9.20305	8.80346	8.92374	9.15463	8.84587	8.96788	9.35784	9.48816	8.99007	9.06119	8.6675	9.29361	9.07547	8.98592	8.87293	9.4117	9.0531	9.27449	9.30031	9.34771	9.48505	8.78483	6.98971	9.715	9.76526	8.74648	8.88935	9.35253	9.22566	8.90558	8.75738	8.62899	8.43892	8.76632	8.52407	9.13559	8.94778	8.51438
CLDN23	0.705168	0.00206457	0.00671941	7.01561	6.31044	6.14279	7.5597	7.49359	5.08536	7.38894	7.55918	6.91002	7.20417	7.50148	6.09893	7.20497	7.48153	7.23028	7.24666	7.40333	6.93352	7.69148	7.37278	6.97476	7.44673	7.61905	7.50477	7.53714	7.42376	7.48699	7.05896	7.00591	6.36599	7.00875	6.94884	7.17629	5.62816	7.51975	7.59999	7.31568	7.48556	7.0922	7.48941	7.61627	7.48134	7.50769	7.7845	6.17776	6.81193
CLDN3	3.33851	2.35112e-20	2.86136e-18	9.60255	6.26404	9.74083	9.52977	9.86539	10.3122	8.89613	10.0002	9.16765	9.32152	9.89532	8.89302	9.63314	9.90028	9.0531	10.1829	8.53564	9.65024	9.37116	9.07547	10.1573	9.71962	9.07137	9.62636	9.67605	9.59671	9.81046	11.0019	9.40514	9.70979	9.715	9.73407	8.87946	10.7078	9.28393	8.02479	9.07652	8.16649	8.70459	8.21126	8.70688	9.54648	9.76018	9.28882	9.46768	10.5771
CLDN4	1.02656	6.37938e-12	1.50165e-10	8.91726	7.89069	8.99095	9.00073	9.13382	9.03052	8.71274	9.12994	8.82385	9.0939	9.11824	8.53727	8.92701	9.29064	8.97698	9.07137	8.90328	8.95857	8.99851	8.85972	8.67237	8.92726	8.89127	8.79338	8.98068	8.96838	8.98435	9.92129	8.94809	8.58117	9.38085	8.93162	8.51592	9.66665	8.78449	9.14104	8.86026	8.92406	8.79523	8.54666	8.87704	9.15006	9.14723	9.08771	8.75061	8.63233
CLDN7	1.24511	1.8055e-11	3.9268e-10	9.69532	8.45021	9.29538	9.48128	9.31728	9.25712	9.914	9.82918	10.3419	9.82918	9.86381	9.51177	9.42731	9.59513	9.38434	10.2672	9.42453	10.1301	9.29825	9.35253	9.845	9.74688	8.84342	9.40869	9.53519	9.4355	9.53893	10.026	10.1223	10.1542	9.69394	10.1928	9.9073	9.64747	10.615	9.35507	9.28105	9.43796	9.78872	9.09456	9.33674	9.13062	9.03916	9.52523	10.0715	10.2644
CLEC14A	0.672648	0.00117484	0.00415589	7.09828	6.42564	7.40843	6.96172	6.97056	7.722	7.13649	6.84513	6.86838	7.22503	7.49096	6.88958	7.01531	7.43528	7.21594	6.6385	7.39046	6.89901	7.02197	7.69025	6.65133	6.74607	7.53182	7.74024	6.97779	6.66525	7.29855	7.27612	6.91959	6.72954	5.26944	7.20946	7.72371	7.55988	7.73352	8.10054	7.8243	7.95007	7.41841	7.89005	7.67132	7.80546	8.11453	8.27302	6.68818	6.40116
CLEC18A	0.797275	0.0158576	0.0363591	6.42618	5.62891	5.61944	6.43843	5.95326	5.97603	5.93512	6.3394	5.85144	7.01699	5.74366	6.04286	6.63218	6.06161	5.54862	5.8545	5.68552	7.11788	6.05915	6.73207	5.97448	6.34569	5.88905	6.88563	6.37836	6.11286	6.09677	5.26344	6.86712	6.42361	4.55991	5.62795	5.69319	6.25494	6.73673	6.37755	7.82672	6.35643	5.88837	6.70723	7.919	6.17214	6.44908	5.8413	5.78511	9.23884
CLEC1A	1.78471	1.36122e-09	2.05711e-08	8.27643	6.49172	8.64009	7.84621	8.80318	9.20066	8.28138	7.94165	8.44543	8.41692	8.57864	8.11777	8.73105	8.58783	8.11278	8.09736	8.33304	8.23787	8.39718	9.09456	7.95801	8.29474	8.85894	8.96385	8.30182	8.28764	8.08886	8.37613	8.39489	8.04994	5.92442	8.55975	8.91911	9.42414	8.63273	9.11189	8.85451	9.12595	9.07048	8.88513	8.8383	9.30183	9.32526	9.07683	7.35178	7.35237
CLGN	1.01353	0.0143879	0.0335844	8.80985	7.79632	8.45186	10.5403	8.98625	10.923	9.54606	9.81694	6.08888	9.37395	7.0878	9.94881	9.75122	8.64667	7.78783	10.0987	8.75609	7.67756	9.78709	7.71769	7.98801	6.08587	8.31605	8.2346	7.80377	9.13315	9.46438	8.0528	7.10811	10.4966	6.96708	9.28241	7.3363	8.49607	10.1102	10.1567	9.06268	6.06161	9.11854	8.50374	10.0174	9.62672	6.88349	9.25675	8.06637	8.25885
CLK2	2.26226	1.42715e-12	3.79689e-11	11.9612	9.69897	11.3791	12.2081	12.4951	11.0448	11.9908	12.2265	11.8142	12.0394	12.4432	11.1444	12.3374	12.1711	12.2081	11.8616	12.1922	11.9083	12.6627	12.1763	12.0246	12.3852	12.8837	12.435	12.5867	12.435	12.392	11.8647	11.9422	11.4656	10.0722	12.3103	12.4275	10.9372	12.5867	12.9788	12.6821	13.1157	12.6627	12.8837	13.0261	12.8991	12.9244	13.0416	10.9095	11.5512
CLK3	0.862889	0.00630535	0.0171317	9.1789	8.31602	9.01405	9.53095	10.0676	8.3418	9.52131	9.68833	8.81968	9.64618	9.7326	8.3881	9.48982	9.43384	9.53654	8.95118	9.57752	9.1044	10.0095	9.81339	9.23725	10.0348	10.2487	9.85252	10.3113	10.2787	9.87341	9.17518	9.30989	8.59385	7.38894	9.8915	9.95991	8.18927	9.47735	9.86886	9.56748	10.2811	9.40825	9.91854	9.86071	9.9873	10.1547	9.79472	7.99439	8.21593
CLN6	0.677258	7.30123e-05	0.000381223	7.72747	7.05021	7.78099	7.75348	7.99367	7.44454	7.80582	7.94794	7.81826	7.83483	7.95654	7.38432	7.85765	7.91999	7.98224	7.80057	7.80619	7.84804	7.9623	7.83461	7.78118	7.64455	7.85117	8.1267	7.85038	7.80919	8.10693	8.17102	7.90002	7.58324	6.84369	8.17247	8.07365	7.44653	7.83595	8.42683	8.11777	8.17571	8.00685	8.31462	7.77449	8.00617	8.39196	8.22634	7.59199	7.13878
CLPB	3.25054	1.2905e-15	6.26894e-14	9.89519	6.64465	9.74964	10.5695	10.8489	8.96996	10.48	10.5286	10.0645	10.309	10.7733	9.36311	10.3034	10.5386	10.1887	9.85849	10.3232	9.82973	11.0187	10.5999	10.0543	10.6767	11.2678	10.6387	11.1429	10.7981	10.7002	9.93355	10.1449	9.62054	5.95461	10.7101	10.5477	8.63982	10.1316	10.7542	10.2811	10.2251	10.1192	10.4871	9.91686	10.2406	10.5054	10.5105	8.74264	9.26041
CLRN1	0.931023	0.00425772	0.0123337	7.85612	6.9251	7.82329	8.2232	8.43454	6.96311	8.3443	8.47142	7.96352	8.38981	8.55625	7.50456	8.24029	8.28441	8.09078	8.14261	8.20741	7.91179	8.36029	8.33764	7.93097	8.47015	8.54958	8.35018	8.40068	8.49416	8.39534	8.2157	8.2318	7.75093	5.19035	8.44301	8.57326	6.79017	8.33366	8.76575	8.75199	8.72415	8.05777	8.4161	8.30315	8.41468	8.36786	9.15945	6.60342	6.78011
CLSTN2	0.801109	0.00111138	0.00396946	8.05903	7.25792	8.25593	8.32073	8.68759	8.07733	8.44352	8.36005	8.1097	8.10341	8.69031	7.70689	8.42332	8.53326	8.31735	8.1899	8.37216	7.93689	8.67898	8.99184	7.95566	8.3418	9.01975	9.07547	8.51341	8.28543	8.22544	7.99895	8.1139	7.75538	6.26492	8.24359	8.61571	7.99044	8.2889	9.06119	8.89178	8.63541	7.95887	8.41592	8.37794	8.45663	8.71174	9.04097	7.01227	6.75478
CLTCL1	0.626151	0.0395036	0.0758575	8.63537	8.00922	8.45566	8.68909	9.46399	8.24146	8.97551	9.00199	8.38775	9.01342	9.13968	8.04218	8.94867	9.01342	8.79556	8.30636	9.00804	8.51824	9.60194	9.35545	8.36192	9.09195	9.68033	9.18536	9.59806	9.33742	9.05794	8.44728	8.56836	8.09296	6.28303	9.08699	9.17518	7.70164	8.89352	9.88023	9.3574	9.82667	9.09356	9.31773	9.28168	9.01607	9.76261	9.70979	7.49381	7.94682
CLUH	2.13178	5.92534e-11	1.17991e-09	11.9177	9.7859	11.4656	12.1763	12.3598	11.1881	12.2028	12.1594	11.7796	12.0514	12.3598	11.1136	12.2716	12.2944	12.0775	11.6267	12.2662	11.8756	12.6536	12.2142	11.9204	12.4432	12.8342	12.3103	12.6536	12.3312	12.3656	11.7388	11.7177	11.1456	9.76261	12.3713	12.3598	10.84	12.5955	12.9244	12.6135	12.9501	12.5534	13.0261	12.9374	13.0094	13.0094	12.9501	10.9445	11.7027
CMC2	1.04207	1.18767e-05	7.62242e-05	10.2497	9.20759	10.7156	10.7682	11.0299	11.1689	10.9821	10.363	9.72359	10.8669	10.889	9.70375	10.8134	10.4	10.2295	9.70937	10.3908	10.2802	10.4057	11.4341	10.599	10.452	10.7931	10.4546	10.083	10.1934	10.5276	9.84072	10.0378	9.77711	8.77187	10.1288	9.97587	10.8927	10.3285	10.3598	10.649	10.8243	11.0788	10.1741	10.62	10.709	11.2324	10.0869	9.00439	10.0899
CMTM6	0.870822	0.00030527	0.00131314	9.99614	9.12532	11.2113	9.47063	9.07481	10.4828	10.5123	10.3984	10.723	10.5655	10.4765	10.7587	10.0874	9.8033	10.9836	10.606	9.37696	10.3507	8.80005	10.4334	9.60684	9.27885	9.30151	9.6587	9.8188	9.89266	9.38253	11.4161	9.47294	10.5809	10.4432	10.491	8.38579	10.1398	9.56294	8.76799	9.7312	9.34731	9.91686	9.84662	9.7837	9.34807	9.26409	8.9392	9.6587	9.981
CMTM7	1.08418	8.96334e-07	7.50114e-06	9.63161	8.54743	10.2286	8.66939	8.87837	9.81534	9.29679	10.0944	9.80128	9.94688	10.1621	9.93859	9.82521	9.69503	10.0297	10.0899	8.87734	9.95505	9.00004	9.81694	9.11596	9.12385	9.48166	10.026	9.51499	9.73212	8.92497	10.8938	10.5191	10.1471	10.0593	9.59935	8.62476	10.9568	9.60909	8.22283	8.92565	9.12447	9.12928	9.66968	9.33606	9.74822	9.52523	9.19304	8.23787	9.84609
CMTM8	1.19757	1.50981e-06	1.20155e-05	8.12826	6.93069	7.50873	8.25616	7.93155	8.92254	7.50654	8.85683	8.88575	7.74024	7.35237	8.44705	8.01861	8.08234	8.32178	8.12607	7.72503	8.29474	7.2707	7.86809	7.29836	8.16382	9.08154	6.76887	8.29245	7.12521	8.3426	9.35926	7.79161	7.60741	8.80292	8.25658	6.69918	7.21748	8.37954	7.89194	7.85038	7.22754	7.71007	7.86008	8.14669	8.45893	7.76853	7.01304	8.69278	8.18028
CNBD1	1.88803	1.48616e-06	1.18479e-05	7.24315	5.35512	7.58469	7.72295	8.48156	6.17644	8.11961	7.99917	6.81824	8.092	8.08538	6.46499	7.77545	7.99307	7.61484	6.85445	7.76897	6.58454	8.35159	8.38304	7.19491	7.92457	8.31951	7.75538	8.1919	7.90304	7.67946	6.94154	7.75496	7.11614	6.19189	7.83805	7.73074	6.39283	7.66702	8.41446	8.16282	8.79827	7.56528	8.3443	7.96891	8.33887	8.68087	8.1644	5.10325	5.8054
CNDP2	0.622373	6.03409e-05	0.000321593	10.0091	9.38672	10.4966	9.89918	9.98047	9.61735	10.0457	10.0371	9.90904	10.5486	10.201	9.29643	9.74688	10.2936	10.2313	9.69919	10.1034	9.79987	10.1235	10.2406	10.1928	10.17	10.1915	10.0158	10.0163	10.0474	10.2286	9.56006	9.59856	9.29322	9.65167	10.2398	10.2487	9.84991	10.4662	10.6249	10.3835	10.7485	10.2825	10.2914	10.6635	10.5636	10.3636	10.2386	9.64215	9.83842
CNGA1	0.686694	0.0108622	0.0267953	9.21571	8.52902	8.93767	9.09706	9.914	8.26573	9.21977	9.37395	8.80641	9.54273	9.73407	8.15438	9.24896	9.38395	9.28241	8.76208	9.55385	8.81492	9.96042	9.97081	8.90218	9.38085	9.85154	9.47569	9.79278	9.72268	9.41502	8.94625	9.08379	8.52818	8.44157	9.53437	9.76889	8.5913	9.51631	10.1762	10.1192	10.2551	9.46105	10.0342	10.1512	10.223	10.2936	10.2321	8.40904	9.00411
CNGA3	0.87171	0.000835005	0.00310902	6.52379	5.65208	6.8029	6.36259	7.22455	6.80887	6.43883	6.35321	6.1617	6.6281	7.1484	5.90557	6.62904	6.66566	6.55345	6.47196	6.59653	6.16543	6.8803	7.33147	6.4238	6.73945	6.79682	6.60082	7.13273	7.16173	6.48502	6.59265	6.47837	6.32557	5.24126	6.53002	6.74995	7.84322	7.08302	7.15917	6.95294	7.37963	7.12077	7.23594	7.01166	7.08742	8.37074	7.89699	5.25497	5.56059
CNNM2	0.657936	1.01378e-08	1.28792e-07	7.66433	7.00639	7.55527	7.80881	7.98449	8.07185	7.86284	7.88864	7.57758	7.96848	7.81642	7.35158	7.75072	7.9159	7.69552	7.55426	7.74947	7.5717	7.75835	7.93542	7.87503	7.82779	7.83783	7.7959	7.71139	7.83966	8.01398	7.73563	7.68226	7.68646	7.35258	7.88824	7.84506	7.37503	7.76367	7.98658	8.04112	7.93842	7.89281	8.02524	7.74867	7.77238	7.81685	7.96848	7.18519	7.35737
CNOT11	1.91766	1.11061e-21	1.86844e-19	9.49284	7.57518	9.85686	9.20631	8.79468	9.35962	9.33071	9.24999	10.2083	9.77513	9.6139	10.2495	9.76668	9.9519	9.56869	9.54787	9.97416	9.8242	9.46923	9.33827	10.2921	9.64888	8.94656	9.19174	9.07452	8.60721	9.64365	10.1075	9.46278	10.2888	8.73555	9.55093	9.46518	9.512	9.26332	9.14887	9.25038	9.24632	9.74236	9.09615	9.43338	9.62802	9.13646	9.25414	9.70327	9.73728
CNOT7	0.637046	0.000290444	0.0012574	10.0836	9.44652	9.61874	10.2364	10.4725	8.95318	10.1518	10.1491	9.6139	9.98505	10.5636	9.98143	10.2551	10.1852	10.2106	9.90957	9.98309	10.382	10.776	10.2414	10.0457	10.3878	10.7167	9.84388	10.5719	10.5548	10.2678	9.6042	10.1137	9.10952	9.42124	9.93524	10.3967	9.26695	10.2259	10.4265	10.3539	10.5628	10.4154	10.6081	10.5443	10.723	10.8475	10.84	10.0982	9.42691
CNP	0.796112	4.44672e-10	7.44809e-09	9.85328	9.05717	9.89311	10.1336	9.86981	9.75832	9.47215	10.1529	9.54952	10.1907	9.72867	9.37962	9.6368	9.67605	9.50839	10.3113	10.0185	9.83842	10.1471	9.72268	9.66435	10.4022	10.0191	10.2472	9.90849	9.6111	10.3812	9.71192	9.93693	9.2975	9.51119	9.81431	9.68833	9.97813	9.81638	9.72314	9.78225	9.95238	9.99352	9.80779	9.68647	9.69226	9.86317	9.76852	8.9146	10.1355
CNPY4	0.706995	0.000506972	0.00202824	8.40428	7.69729	7.73447	8.57864	8.71998	7.52639	8.54598	8.77724	8.35836	8.38012	8.40407	8.92674	8.74383	8.35605	8.78179	8.5041	8.6111	8.45325	8.56222	8.6067	8.28626	8.63649	8.96254	9.37696	8.73764	8.93478	8.84507	7.91345	8.97521	8.51264	7.7635	9.22566	9.43639	7.49581	8.63846	9.1799	9.09101	9.44716	8.6404	8.50484	8.77021	8.63357	8.67068	9.16463	7.33669	7.73197
CNTNAP3P2	1.06093	1.12635e-12	3.05705e-11	5.81448	4.75355	6.16221	5.71872	6.50646	6.00497	5.75476	6.01109	5.87139	5.44648	5.91628	5.88063	6.07473	6.27565	5.85989	5.92921	5.90067	5.94667	6.0618	6.28839	6.22559	5.81879	5.76759	5.99867	5.60296	5.86974	5.67422	5.97578	5.98936	5.49146	5.72003	5.81183	6.09837	5.63287	5.65325	5.92569	5.65351	5.88285	6.46422	5.68876	5.69349	5.64009	6.10341	6.36081	5.09866	5.77023
COA4	0.635596	0.00406652	0.0118812	10.1708	9.53518	10.4066	10.0869	10.0317	11.1395	10.216	9.97081	9.845	10.39	10.3516	10.1634	9.52477	9.79177	9.48645	10.629	9.9873	9.60648	9.46138	10.7438	9.57923	10.3893	9.77975	9.94491	9.99804	8.9964	9.8788	10.5165	10.5211	11.0003	10.6541	10.6767	9.91037	11.0906	10.4092	9.10846	9.91627	9.92785	9.74934	9.8188	10.2321	9.65927	9.22811	8.93104	10.2685	10.1573
COASY	0.740437	7.53833e-05	0.000391815	9.62012	8.87969	10.1131	9.67878	9.88821	10.3754	9.64086	9.5701	8.93008	10.1594	9.9674	8.97163	9.67878	9.87621	9.47385	9.55617	9.67166	9.29423	10.1734	10.2271	9.41017	9.54437	10.1942	9.2674	9.97476	9.84238	9.63478	9.79932	9.1941	9.95434	8.93137	10.0982	10.2295	9.61916	9.72359	9.76526	9.93805	9.81046	10.0303	9.96259	9.83842	9.89815	10.386	9.90278	8.72972	9.84937
COL13A1	0.597851	0.00149612	0.00511142	8.72248	8.12463	8.31714	8.83996	9.02741	8.27136	8.85999	8.89127	8.53995	8.73245	8.83942	9.00393	9.06364	8.6528	8.94176	8.70432	8.73083	8.36077	8.90436	8.94525	8.45212	8.81968	9.22671	8.93673	9.08051	8.71801	8.6993	9.26964	8.65411	8.89379	8.62212	8.59604	9.26885	7.71435	8.7939	9.22699	9.0347	9.30917	9.06787	9.35181	8.88631	9.33606	8.70989	9.41132	7.67587	8.16987
COL15A1	1.11729	3.7532e-05	0.000211562	7.88632	6.76904	8.50557	7.58922	8.06925	8.68535	7.72584	7.83025	7.39162	7.97577	8.44856	7.58262	8.18178	8.39778	7.50535	7.16437	8.59066	7.30773	8.35271	8.9015	7.71985	7.72135	8.40707	7.83522	8.19831	7.74165	7.84038	7.25569	7.44361	6.74377	6.26472	7.64805	8.29245	8.3534	8.11517	8.86481	8.1284	8.60779	8.1925	8.68933	8.46541	8.372	9.02465	8.54237	6.34401	6.8567
COL23A1	0.828101	1.63786e-05	0.00010186	7.28572	6.45762	6.50168	7.9109	7.15475	6.71022	6.55686	6.76343	7.89047	8.39534	7.2104	7.6092	7.28551	6.94154	6.73362	6.98134	7.32436	6.89531	7.9018	8.50484	7.81489	7.26652	7.85787	7.54174	7.11849	7.38635	6.81325	6.83276	6.92429	6.87406	6.60646	6.81193	7.59161	7.34361	7.55254	7.7369	7.17659	7.1533	7.56159	7.03575	7.22207	8.28076	7.25265	7.50948	6.96708	6.58473
COL28A1	0.682167	0.000285441	0.00123855	5.58584	4.90367	5.74914	5.29015	5.99302	5.61475	5.28392	5.90157	5.39209	5.54887	5.86942	5.3867	5.93466	5.49702	8.27927	5.58957	5.70084	5.60967	5.7535	5.6726	5.98895	5.61505	5.92296	5.4066	6.06115	5.60718	6.05209	5.11074	5.2332	5.32124	5.77248	5.96176	5.32742	5.40454	5.50478	5.67976	6.0848	5.27832	5.66749	5.53285	5.85893	5.26726	6.12938	5.68704	4.96583	5.90816
COL4A1	0.980753	2.21738e-05	0.00013358	9.42494	8.44418	8.97551	9.08246	9.35962	7.87341	9.50321	9.51088	10.2372	9.45987	8.55281	8.9791	8.89266	8.92169	8.60213	9.81694	10.9766	9.65392	9.44596	9.45298	9.01575	9.91803	9.2738	9.24938	10.0421	9.23125	9.85849	8.82054	9.93417	8.83965	8.36005	8.94141	9.50584	9.62998	9.16172	10.0863	8.77515	9.83802	10.1301	10.1131	8.71776	9.38892	10.201	9.66397	8.7542	9.4006
COL4A2	0.831667	0.00302292	0.00925028	8.60219	7.77052	8.43825	8.11751	8.59155	8.15956	8.01483	8.89019	9.04633	8.4969	6.83978	8.09058	7.47077	7.90435	7.69884	8.74505	9.30555	9.19209	7.783	8.1674	8.71174	9.27783	8.59988	8.29813	9.33271	7.7942	9.01196	8.4023	9.66719	8.58539	8.24146	8.1352	8.26272	9.38395	7.27355	8.69031	7.12382	7.64824	9.37838	9.19615	7.32284	8.36054	9.34771	8.247	8.09224	9.15266
COL9A1	1.59781	4.8092e-08	5.25727e-07	7.02993	5.43212	6.12418	6.75608	6.88905	7.26883	6.67005	6.6134	6.52881	7.1273	7.35394	7.09852	9.85314	6.92182	7.09732	6.64692	6.8788	7.5348	7.87364	6.91635	6.68773	8.1488	6.98349	7.77388	7.61096	6.94117	7.11153	6.02772	6.81325	5.80917	4.95926	6.91148	6.65097	8.87212	8.06444	7.63769	7.60077	7.8496	6.97171	7.55988	7.69866	7.84056	7.53441	7.42082	5.88559	6.74377
COL9A2	0.824209	0.000257088	0.00113162	8.98882	8.16461	9.19747	9.06726	9.19546	9.47657	9.00913	9.31101	8.63137	9.0344	9.20305	9.14104	9.15368	9.15973	9.16863	9.04725	9.34073	8.95713	9.23051	9.58345	9.06606	8.99942	9.21689	9.43601	9.30031	9.37767	9.2425	8.68783	9.05856	8.80346	7.56555	9.16765	9.69543	9.48088	9.26813	9.63051	9.51054	9.57189	9.51457	9.1941	9.32998	9.54167	9.65122	9.57152	8.01017	8.79171
COLGALT1	0.662626	0.00648274	0.0175359	9.44537	8.78275	8.60411	9.44716	9.71713	8.15505	9.67012	9.21221	9.53613	9.31101	9.49023	8.51032	9.37838	9.11381	9.80128	9.88473	9.27339	9.30917	9.49234	9.42769	9.10158	9.76713	10.0421	10.537	9.67983	9.76624	9.95751	9.88416	9.79882	9.63416	9.26442	10.178	10.8387	8.10054	9.73889	10.537	10.1124	10.5276	9.4753	10.2748	9.80285	9.53654	9.89413	10.4385	8.87916	9.39445
COMP	1.658	0.00168677	0.00565554	6.78153	5.12354	5.41181	6.00524	6.10728	5.18243	5.95461	7.50926	6.95294	6.6586	5.15851	7.36504	6.54554	5.30347	5.39865	5.3028	5.16308	5.89969	6.89651	8.8591	5.44083	6.40015	5.21752	6.45981	8.63308	5.2502	6.44217	5.56176	5.42688	6.49801	5.22592	5.33214	5.48732	5.28647	5.98846	5.34321	9.285	7.13195	8.62212	9.86232	5.61388	10.4993	8.71547	7.55002	6.16193	8.14182
COMTD1	0.672714	0.000860524	0.00319002	9.50026	8.82754	10.206	9.71453	9.89532	10.2479	9.78763	9.78653	9.15764	10.1553	10.0787	9.18158	9.6563	9.83842	9.39041	8.87437	9.67508	8.94141	9.94312	10.4352	9.39206	9.83278	9.99241	9.32839	9.75218	9.89207	9.61916	8.78985	9.4842	8.77465	9.21116	9.55814	8.98737	9.54026	9.74534	9.79725	10.0863	10.1094	10.0329	9.98779	9.67878	10.0354	10.3135	9.76261	8.52451	9.3861
COPS7B	0.593328	0.000377028	0.00157416	8.51892	7.92559	8.66496	8.51385	8.73662	8.54782	8.73133	8.35206	8.50269	8.93456	8.98769	8.45093	8.6234	8.82159	8.63137	8.25704	8.66594	8.51733	8.7094	9.02773	8.58281	8.68335	8.88935	8.79827	8.67283	8.67536	8.73555	8.56537	8.41223	8.32706	9.30219	8.65883	8.48274	8.64276	8.70335	8.93188	8.81632	9.03836	8.52613	8.7339	8.80836	8.69556	8.9552	8.89759	8.22153	7.89843
CORO2A	0.994729	9.72077e-09	1.23768e-07	7.79277	6.79804	7.59837	7.75458	7.90695	7.44395	7.80432	7.64129	7.98898	7.44695	8.3615	7.79994	7.29781	7.47608	7.85952	7.85578	7.82591	7.34065	7.61406	7.87679	7.36228	8.00728	8.55529	7.61155	7.97641	7.68444	7.54929	8.12457	7.16818	7.79397	8.3418	8.08886	7.97265	7.06584	7.76383	8.11839	8.15762	8.20429	7.84211	7.24352	7.65028	7.89634	7.73792	7.54332	6.75188	7.935
COX5A	0.786512	2.50474e-09	3.60884e-08	10.6923	9.90576	10.9868	11.0652	10.4828	10.9397	10.2629	11.326	10.9498	10.8742	10.7885	10.2427	10.3708	10.606	10.732	10.5305	10.6874	10.3804	10.5378	10.9948	10.6738	10.2047	10.3961	10.7515	10.6327	10.658	10.8276	10.9008	10.5749	10.9737	10.9358	11.4361	10.7515	10.9584	10.658	10.3917	10.4689	11.089	10.2992	10.1887	10.1229	10.2066	10.5157	9.73632	11.0071	10.9721
COX5B	0.650418	5.39096e-06	3.73434e-05	11.3984	10.748	11.5311	11.9167	11.0113	12.0294	11.9657	11.1551	11.678	12.0246	11.3518	11.2541	11.6072	11.3375	11.5381	11.1081	11.3611	11.6293	10.8208	11.3544	11.4234	11.5032	11.1652	11.123	10.8428	11.1358	11.7444	11.7888	11.5962	11.6805	11.9657	12.1181	11.8616	11.7236	11.3353	10.923	11.2395	10.5893	11.3316	10.9071	11.1169	11.1314	10.4	10.5191	11.4449	11.4586
COX6B1P3	0.631728	7.29791e-05	0.000381137	7.13347	6.50175	7.18207	7.15874	7.21215	7.62389	7.07559	7.35902	6.95389	7.0046	7.36504	6.84466	7.12675	7.20598	7.22012	6.77001	7.25099	7.0742	7.722	7.29703	7.04901	7.09389	7.33612	7.20649	7.15102	7.2458	7.37586	7.0029	7.16084	7.19012	6.78425	7.5268	7.16233	7.44717	8.19103	7.92619	7.48736	7.29983	7.26999	7.35178	7.15577	7.44838	7.87478	7.62216	6.86202	6.50022
COX6CP2	1.23563	0.00845458	0.0218701	8.72332	7.48769	8.38132	9.32189	9.77562	7.8207	8.99668	9.52703	8.80915	9.22039	9.4372	7.98489	9.17013	9.10093	9.31021	8.54132	9.1464	8.83009	9.66122	9.45054	8.62419	9.40981	10.0735	10.0635	9.67166	9.55186	9.45054	9.08471	8.94428	8.60011	6.74263	9.54787	10.1118	8.12607	9.46967	10.2386	9.71102	10.5096	9.19174	9.59374	9.83361	9.6087	9.67461	10.3152	7.14165	7.13516
COX7BP1	0.622209	0.00161263	0.00544524	9.9805	9.35829	9.64888	10.1559	10.2622	10.8231	10.3135	10.186	10.4626	10.178	10.5105	9.08864	10.076	9.72825	9.64459	9.50455	10.0152	9.53095	10.5123	10.4202	9.31101	10.0952	10.3708	10.1241	10.1484	10.2444	10.0174	10.1174	9.96203	10.1915	7.20245	10.1614	10.0944	10.104	10.1403	10.1068	9.95238	10.4616	10.1198	10.5951	10.0987	9.90797	10.3786	10.2113	10.1844	10.3976
COX8C	0.816076	0.0441914	0.0829247	5.1302	4.31412	5.22843	4.92383	4.52166	5.20737	4.98839	4.75463	5.07076	9.24324	4.83646	8.60456	5.01256	4.93537	4.82549	4.46515	5.21031	4.77714	4.99715	4.59958	4.68977	4.15536	5.15329	4.74977	4.0035	4.7699	4.78037	4.92759	4.97625	8.58447	4.77854	4.73419	4.84297	4.97561	4.6011	4.67552	4.09088	3.80073	4.42424	4.30062	4.76643	4.55033	4.86636	4.47991	4.76862	9.45874
CP	2.40395	1.33851e-08	1.64917e-07	10.098	7.69404	11.2708	11.3544	9.84991	10.9667	10.1062	9.32798	9.27982	10.6258	11.174	10.2398	10.8538	11.183	11.3518	11.3459	9.99636	10.3612	9.56294	8.70837	10.7967	11.1532	10.1209	9.63051	9.80037	8.84816	11.1314	10.1614	7.13177	11.326	10.6788	10.8013	8.41339	10.1169	9.6139	9.63947	9.30331	9.14942	10.2928	9.52253	10.3961	10.991	9.39883	9.82124	7.59039	10.5872
CPAMD8	0.754612	0.000138416	0.000661297	7.89345	7.13884	6.66261	8.4188	8.68058	6.82936	7.68021	8.18521	7.07591	7.75916	7.919	6.84166	7.57958	7.37335	8.28138	8.30119	7.18681	8.27092	8.16361	7.22791	7.84804	8.77571	8.22409	8.42397	8.06153	8.3298	8.28462	8.18092	8.182	7.83613	8.21525	8.38168	9.03808	7.23673	7.69072	8.09515	7.84076	8.33504	8.02128	8.11218	7.99326	8.14963	8.1899	8.35965	6.97258	7.90553
CPB2	0.652716	8.0311e-05	0.000414415	6.24331	5.59059	6.32379	6.21046	6.36135	6.96153	5.83258	6.04332	5.89238	6.48565	6.44217	6.22833	6.5132	6.71745	6.10752	6.48334	6.46719	6.47792	6.49321	6.38353	6.41059	5.96313	6.33492	6.5957	5.98161	5.81465	6.01044	5.97911	6.33919	6.31149	7.3044	6.1514	6.21544	6.9198	6.44257	6.67202	6.35404	6.30659	6.28407	6.30801	6.22224	6.59869	7.0519	7.01571	5.36323	5.91604
CPN1	0.588251	0.043506	0.0818869	7.80999	7.22174	7.33147	7.91573	8.9589	7.42878	8.14921	8.3434	7.66465	7.729	8.06655	7.12311	7.73074	7.76897	7.83501	7.87176	7.91751	7.45619	8.39995	8.41406	7.40262	8.31207	9.06087	8.70335	8.87583	8.24487	8.23358	7.63786	7.92081	7.38875	6.81377	8.21867	7.956	7.57365	8.57676	8.9152	8.68159	9.51861	7.58938	8.2191	8.33293	8.3227	9.03344	8.87768	6.7459	6.68402
CPO	0.795083	1.90391e-05	0.000116505	6.04268	5.2476	6.22535	6.17822	6.36867	6.45431	6.26631	6.34181	5.50889	5.96361	6.63115	6.12275	6.13051	6.57573	5.96447	5.79377	6.46067	5.76529	6.84369	6.54034	6.24012	5.94035	6.72462	6.26714	6.10494	5.91467	5.89638	5.87815	5.58898	5.96404	5.69197	5.97816	5.82329	6.18759	6.09337	6.40172	6.79804	7.04286	5.99112	5.88993	6.54925	6.6463	7.08109	6.82955	5.6254	5.44821
CPSF1	0.714653	5.39089e-09	7.24272e-08	9.75922	9.04457	9.55429	9.57106	9.85568	10.2217	9.48036	9.83014	9.64	9.72056	9.57508	9.01342	9.42496	9.6563	9.7312	9.89867	9.35428	9.53654	9.4753	9.7747	9.36224	9.91749	9.74964	10.1094	9.94077	10.2888	9.69771	9.63859	9.78021	9.81046	9.69964	9.99804	10.3051	9.55186	9.69872	9.91627	9.72164	10.4334	9.9946	10.1411	10.0317	9.99698	9.63527	9.9218	9.59764	9.99129
CPSF3	0.638452	0.000238588	0.00106269	9.64068	9.00223	10.3263	9.7735	9.30519	10.7473	9.45095	9.67166	9.85626	9.73493	9.37584	9.50455	9.11717	9.81092	9.61554	9.28352	8.95206	10.1131	9.70728	9.32071	9.67426	9.41388	8.82464	9.19106	9.28695	9.45054	9.6111	9.76668	10.7219	9.95338	9.42453	9.61916	9.56969	9.65927	9.70676	9.06364	9.3371	9.04996	9.63627	8.9429	8.99789	9.44513	9.1694	9.54208	9.68314	10.1458
CRABP2	2.39935	1.93936e-13	6.18863e-12	10.462	8.06262	10.599	10.2725	9.36734	10.9095	10.8962	10.8231	11.2749	11.5381	10.0917	10.417	10.5592	9.55059	9.14564	10.9896	9.98505	11.2432	10.3224	10.413	10.6106	10.2016	11.0921	10.2608	10.1928	10.1276	11.4912	10.9498	11.6019	11.3011	11.4046	11.4468	10.4256	9.12155	10.5674	7.625	8.75061	9.2425	10.5486	10.2459	9.23849	9.9073	9.99573	10.204	10.2534	10.7671
CRADD	2.47872	2.03156e-08	2.42095e-07	10.02	7.54131	9.7517	10.6447	11.4026	7.95995	10.643	10.4697	8.83445	10.5999	10.9498	8.70736	10.923	10.9254	10.5021	9.93524	10.6231	9.91301	11.6293	10.7415	9.93752	10.9986	11.6325	10.7473	11.1067	11.0503	10.278	9.30812	10.2701	9.26813	7.09519	10.0588	10.5932	7.75476	10.7942	11.2844	11.0045	11.3611	10.7844	10.9134	11.407	11.2861	11.853	11.3755	8.37819	9.00251
CREB3	0.689162	0.00259453	0.0081386	10.0979	9.40874	9.78123	10.3307	10.444	9.27821	10.0462	10.3737	9.97763	10.3067	10.3293	9.57626	10.1895	10.0462	10.4423	10.172	10.1414	9.94881	10.2119	10.1331	10.3844	10.511	10.4408	10.7844	10.4592	10.4671	10.733	9.90675	10.2029	9.76071	8.40068	10.2914	10.6471	8.7732	10.7918	10.8742	10.8302	10.7587	10.4834	10.9282	10.5232	10.6929	10.7542	10.8326	9.44641	10.1047
CREB3L3	0.90383	7.19749e-08	7.54714e-07	5.75471	4.85088	5.66976	5.46898	6.41548	5.73806	5.64902	5.71636	5.78586	5.5149	5.71586	6.11534	5.60803	5.98322	5.93077	6.00167	5.73573	5.8354	6.15851	5.90836	5.84015	5.73362	5.59159	5.53102	6.30331	5.84003	5.53255	5.57404	5.9718	5.66723	3.34929	5.99178	6.08435	5.73075	6.10683	5.91883	5.66003	5.7619	5.73495	5.04045	5.29351	5.73618	5.82038	5.58985	6.06985	5.86974
CRHBP	0.745895	0.02537	0.0532244	7.67028	6.92438	7.67029	8.02178	8.41581	6.95256	7.69337	8.21935	7.56555	8.18568	8.21846	7.15371	8.13725	8.26383	7.8237	7.30101	8.05039	7.44562	8.40482	8.61181	7.33819	7.52803	8.66795	8.26511	7.93097	8.42418	8.46692	7.5982	7.67694	7.6068	6.10142	7.98761	8.28349	7.31956	8.05718	8.49082	8.30381	9.0475	8.07224	8.94397	8.86533	8.30747	8.94955	8.89069	6.306	6.86011
CRHR1-IT1	0.672323	0.00483384	0.013727	8.06569	7.39337	8.05195	8.6019	8.52362	7.09145	8.56599	8.5304	8.28441	8.46185	8.58043	7.77373	8.36927	8.49071	8.4244	8.14142	8.31488	8.1503	8.49926	8.83038	8.34519	8.36586	8.77465	8.75149	8.63389	8.26719	8.33504	7.78386	8.12385	7.77284	6.39764	8.16574	8.32954	7.17097	8.61746	8.7732	8.64822	8.10054	8.30182	8.50269	8.5105	8.36812	8.57577	9.0864	7.076	7.65112
CRNN	0.71195	9.90401e-07	8.20433e-06	6.91693	6.20498	7.03843	6.66221	7.4291	6.82453	7.01266	6.83553	6.99679	6.9652	6.97584	6.85116	6.6734	7.0295	6.73172	6.96291	6.98871	6.93059	6.95053	7.18946	7.05896	6.83319	6.94861	6.82254	7.1342	7.02412	7.08099	6.72776	6.68284	6.75212	4.42314	7.49359	6.96027	7.1411	7.00251	7.2437	6.82113	6.68382	6.92721	7.10055	6.72643	6.88809	7.36844	7.10996	6.90372	6.88384
CROCC	0.780831	0.0266647	0.055392	9.39262	8.61179	9.26226	10.1369	10.6682	8.24847	9.91958	9.90379	9.08612	10.2406	9.89695	8.57456	9.8367	9.72764	9.78123	9.3635	9.84772	9.37649	10.164	10.0507	9.58996	10.5403	10.6961	9.96496	10.6828	10.5211	10.2479	9.47735	9.67327	9.049	6.73422	9.88216	9.92664	8.35791	9.64934	10.0204	10.1768	10.2378	9.67117	10.085	9.81092	9.9249	9.98309	9.81133	7.91915	8.813
CRTAC1	0.815062	0.0189746	0.0420637	7.761	6.94594	7.99064	6.63707	8.42772	8.3434	7.44961	9.049	6.87939	7.41213	6.88404	9.31139	7.89699	8.1463	7.5873	6.57531	7.09278	8.36367	7.81008	7.75139	7.44395	6.94975	8.4937	9.0864	7.80136	9.35215	8.05573	6.9237	10.2182	6.92846	6.8894	6.97925	6.50525	6.5091	7.26781	8.14525	7.51118	8.3507	6.28597	7.16192	8.42098	6.12896	7.58956	7.70944	9.46684	7.65689
CRTC2	0.696117	2.94558e-07	2.73075e-06	8.73119	8.03507	8.31047	8.59718	8.96817	9.21185	8.38277	8.23005	7.99064	8.22634	8.53847	8.21006	8.24204	8.76692	8.34588	8.17237	8.4709	8.37417	8.33237	8.64547	8.29992	9.18694	8.9898	8.90527	8.70688	8.96349	8.97845	8.58832	8.89671	8.80237	8.42513	8.89127	8.70963	9.21466	8.30076	8.49633	8.7963	8.55847	8.46811	8.90123	8.86285	9.05084	8.52655	8.77515	8.82493	9.48542
CSE1L	0.801047	5.55454e-13	1.60262e-11	10.6368	9.83577	10.3388	10.2992	10.4539	10.19	10.6907	10.7659	10.33	10.9202	10.7771	11.1213	10.7078	10.39	10.3605	10.4202	10.2873	10.9254	10.7209	10.468	10.5893	10.8124	10.5191	10.8776	10.5087	10.596	10.5528	10.4317	10.9737	10.2661	10.5123	10.412	10.7485	10.0525	10.7967	10.5349	10.7821	10.7942	10.697	10.6644	10.8219	10.5921	10.7991	10.7587	10.2516	10.6738
CSHL1	0.665442	0.00645897	0.0174877	7.49577	6.83032	7.60077	7.81946	8.3881	7.80237	7.89344	7.65746	7.12077	7.92181	8.0895	6.97171	7.83966	7.8368	7.88426	7.36095	7.84782	7.486	7.99326	8.07598	7.57958	7.95195	7.96164	8.45161	7.94341	7.93002	7.88824	7.42799	7.72434	7.40371	6.27426	7.6262	7.71391	7.8045	7.8178	8.15187	7.90304	7.94165	7.66733	7.71049	7.86992	7.89325	8.04238	7.99732	6.76064	6.74494
CSK	1.13906	0.00301923	0.00924265	11.2857	10.1466	10.9615	11.5702	11.9747	10.7461	11.6972	11.8015	10.8566	11.8015	11.6862	10.1594	11.8176	11.6582	11.7302	11.2268	11.4533	11.2919	11.8963	11.9281	11.1345	12.0147	12.3103	11.808	12.0824	11.9993	11.8344	11.0937	11.294	10.5789	8.5531	11.6916	12.0147	10.1647	12.0445	12.4213	12.1387	12.7861	12.1286	12.0929	12.6627	12.5022	12.5646	12.2944	9.55534	11.1707
CSN1S2AP	0.71745	0.0137675	0.032374	4.70801	3.99056	4.32587	4.75292	4.54451	4.61184	4.68886	4.4019	4.48775	4.42176	4.5618	4.55127	4.49307	4.45859	4.57427	4.06426	4.92805	4.8101	4.37307	4.66863	4.80119	4.05638	4.53737	4.61516	4.78775	4.65758	4.71628	4.09935	4.69823	4.56501	10.616	4.90536	4.45963	5.03301	5.09714	4.49399	5.30819	5.09434	5.40263	4.52166	4.73338	4.98839	5.61186	4.77117	3.90224	3.99579
CSN2	0.843933	0.000910369	0.0033466	7.16351	6.31958	7.27688	7.17828	7.92739	7.03061	7.11658	7.54323	6.94208	7.35844	7.62818	6.7747	7.28459	7.57444	7.5168	7.26361	7.07773	6.70537	7.92798	8.32154	6.70667	7.38246	8.15207	7.95373	7.80987	7.39493	7.52284	7.19767	6.89242	6.78888	5.47268	7.41896	8.01283	7.11153	7.30248	8.41155	7.80036	8.46083	7.31568	7.73503	7.26135	7.47776	8.25616	7.2896	6.01223	6.47047
CSNK1G2-AS1	0.985665	1.57594e-11	3.46706e-10	7.833	6.84734	7.93233	7.56233	7.87725	7.77904	8.01944	7.95195	7.91179	7.49969	7.89218	7.85787	7.68465	8.29859	8.00749	7.88368	8.04299	7.60114	7.61883	8.34588	8.02501	8.10281	7.95976	7.99439	8.03983	7.54611	7.95492	7.56685	7.87058	7.7369	6.75729	8.6326	8.04994	8.16418	8.02297	8.27429	7.94227	8.28712	7.86726	8.45093	7.48866	7.73733	8.22263	8.00442	7.51776	7.61406
CSPG4P5	0.839612	0.0268793	0.0557316	8.21505	7.37544	7.59679	8.87807	9.15368	6.63258	8.89557	9.0344	8.1038	9.04806	8.65598	7.43357	8.74977	8.55505	8.88687	8.23674	8.61854	8.00147	8.83296	8.57122	8.5579	9.21254	8.82626	8.90973	9.13559	9.16562	9.02492	8.26851	8.74648	8.19808	5.32702	9.07014	8.67068	6.29991	8.83525	8.94592	8.75692	9.16826	8.72764	9.20669	9.14072	8.96668	8.98336	9.1467	6.71604	7.62259
CSPG5	0.736943	0.00147022	0.00503345	9.2631	8.52616	8.98563	9.69171	9.9218	8.7552	9.50798	9.24595	8.93137	9.42005	9.5407	8.98133	9.57308	9.76018	9.66164	8.71487	9.39956	9.08183	10.2472	9.79725	8.9543	9.63137	9.94431	10.0874	9.90028	9.75432	9.6182	8.89905	9.23092	8.84636	9.38999	9.41017	9.26785	8.9279	9.20828	9.97023	9.75577	9.70475	9.2899	9.65214	10.1411	9.39475	10.0694	9.84609	8.36192	8.61697
CSPP1	1.14235	2.29202e-12	5.85937e-11	8.52292	7.38057	8.38662	8.56668	8.66886	8.02108	8.42332	8.19987	8.09435	8.79095	8.84083	8.60571	8.92914	8.70311	8.95977	8.57508	8.55031	8.64977	8.64348	8.67385	8.4185	8.56155	8.74433	8.69167	8.52509	8.80969	8.51733	7.72681	8.23058	8.386	8.21399	8.40163	8.29766	8.18969	8.80969	8.71572	9.49023	8.75738	8.86937	8.69086	9.08246	8.92565	9.03078	8.67237	8.30817	8.22263
CSRNP1	0.819384	0.00238237	0.00758011	9.46837	8.64898	9.16735	10.0682	9.75957	8.84172	9.57152	9.9519	9.35466	9.27636	9.57583	8.64094	10.0599	9.97986	10.0309	9.26885	9.82754	9.53801	9.74033	9.87766	9.32001	9.6139	10.0869	9.87556	10.1614	9.48982	9.61341	9.59513	9.34666	8.61088	8.71174	9.66561	9.59374	9.14218	9.8396	10.3636	9.88936	10.5183	9.95991	9.88123	10.2465	10.0912	10.3214	10.1498	8.62822	9.06566
CSRNP2	1.17672	3.36044e-09	4.7036e-08	9.12049	7.94378	9.32001	9.20706	9.5825	9.1988	9.57354	9.40445	9.1203	9.29679	9.74189	8.9964	9.25295	9.35253	9.31662	9.23725	9.43249	9.06919	9.43427	9.73833	9.03344	9.23914	9.53227	9.47215	9.53613	9.37043	9.512	9.07048	9.40361	8.97845	7.67829	9.64365	9.76018	8.82411	9.08051	9.65531	9.53986	9.53654	9.26785	9.44092	9.36808	9.55341	9.5412	9.78823	8.29928	8.52199
CST8	0.587824	0.0325936	0.0651929	8.96416	8.37633	8.88338	9.11662	9.58499	8.7693	9.11991	9.38772	8.76747	9.30483	9.39339	8.59648	8.91029	9.15764	9.47735	8.69503	9.29716	8.69743	9.66164	9.59465	8.90052	9.24021	9.62998	9.2207	9.62544	9.78823	9.15368	8.68159	9.0788	8.68636	7.31528	9.14851	9.19615	9.04576	9.30917	9.82196	9.69171	10.3362	9.49355	9.64669	10.1581	9.86886	9.94199	9.68703	8.09335	7.85932
CTA-268H5.14	0.880243	5.31719e-08	5.75211e-07	5.97254	5.09229	5.71025	5.60859	5.32233	6.01109	5.87968	5.35348	6.26434	5.95002	5.79429	6.04884	5.81568	5.8286	5.9361	5.56682	5.71776	5.90326	5.10622	6.19412	5.99393	5.97578	5.76867	5.91831	5.47422	6.20936	6.21736	5.93099	5.76356	5.91883	7.79031	5.84768	6.94596	6.88366	6.08527	5.74055	5.56998	5.82596	6.08731	6.07381	6.32085	6.75711	6.19619	6.22535	5.79991	6.14865
CTA-384D8.35	1.03663	0.0258131	0.0539709	9.20009	8.16346	9.06435	10.0498	10.5486	7.64596	10.067	10.2171	8.91911	9.92664	10.1142	8.39088	9.72119	9.82918	9.40825	8.99585	9.78277	9.41464	10.3686	9.74236	9.43286	10.3362	10.6983	10.216	10.2608	10.2667	10.324	8.89613	9.34002	8.98336	7.84923	9.58719	9.71761	7.64205	9.90618	10.2393	10.0843	10.4889	9.78472	10.5932	10.0715	10.1235	10.5325	10.5079	7.19785	7.51723
CTAG1A	2.25986	1.67715e-07	1.64198e-06	8.19899	5.93913	7.6793	8.12037	8.27544	6.72339	8.24297	8.09651	8.03753	10.2756	8.27723	10.2678	8.26024	8.372	8.00147	8.00728	8.1626	8.22746	8.26423	8.23738	7.98546	8.48852	8.32518	8.38775	8.25781	8.12641	8.21265	7.87077	8.46185	7.73352	5.23056	8.37974	8.43682	6.58473	11.1121	8.47142	10.2047	8.36535	7.82227	8.42559	8.70963	8.15292	8.08441	8.43892	7.18042	12.2762
CTB-43E15.1	1.02277	1.06989e-12	2.91418e-11	5.79257	4.7698	5.61246	6.03243	5.48218	6.01766	5.87543	5.56235	5.77442	5.86262	5.55328	6.04598	6.306	5.5971	5.84525	6.42571	5.30689	6.00633	5.6208	5.34024	6.08687	5.92004	5.72287	6.00835	5.55799	5.66942	6.06019	6.16503	5.89516	6.27526	5.43029	5.78746	5.51858	5.95139	5.53229	5.92995	5.48368	5.39029	5.67312	5.15283	5.68398	5.85422	5.04207	5.20207	6.46968	5.3606
CTB-92J24.2	1.28201	5.99245e-06	4.09765e-05	7.56608	6.28407	7.58196	8.60902	5.77273	7.0077	7.54569	7.58677	7.63529	8.5327	7.81409	8.85451	7.37622	7.6677	6.51796	8.04738	7.44543	7.74381	7.55863	6.93815	7.71103	7.94552	7.27734	7.01835	7.11658	7.61925	8.23674	8.07835	6.33224	6.63761	8.1923	7.77507	7.70468	7.42707	7.6517	6.84847	8.42706	7.80503	7.78574	6.96929	8.62721	6.44217	7.01758	7.31269	6.11395	7.99404
CTBP1-AS2	0.831198	0.0439147	0.0824934	9.50503	8.67383	9.11854	9.99352	10.607	8.30932	10.1956	9.88023	9.35009	10.1062	10.3353	8.61882	10.083	10.2329	9.90675	9.3323	10.1774	9.28545	10.629	10.2739	9.66921	10.3484	10.7267	10.172	10.7485	10.4899	10.2465	9.36063	9.7578	8.92109	6.70925	10.1102	10.1229	8.10281	10.1836	10.6655	10.452	10.7705	9.88023	10.5636	10.3353	10.5276	10.7716	10.8147	7.96038	8.3775
CTC-527H23.4	0.698852	0.0035497	0.0105958	7.96855	7.2697	7.5127	7.93944	8.34588	7.77888	8.00848	7.90815	8.23897	7.51118	8.58783	7.4141	7.91199	7.77058	8.35424	7.88178	7.76811	7.7153	8.20659	8.46446	7.76063	7.75237	8.47612	8.14943	8.77724	8.10675	8.44906	8.05614	7.95492	7.82515	5.76265	8.37731	8.586	8.14737	8.42244	8.7939	8.56622	9.2248	7.92719	8.71144	9.05272	9.27885	9.05794	8.57765	7.05623	7.57286
CTC1	0.676982	0.0143185	0.0334773	8.56478	7.88779	8.70963	9.02676	9.29961	8.19318	9.36104	9.05272	8.57187	9.02338	8.98102	8.20322	9.07853	8.95118	8.84258	8.32933	8.97551	8.51781	9.10952	9.15629	8.84377	9.08734	9.44716	9.33048	9.14257	9.22977	9.00171	8.23876	8.53875	8.02596	6.13585	8.61301	8.78152	8.18668	8.87293	8.9706	8.93008	9.06673	8.95831	9.22911	8.81186	9.20066	9.43171	9.41288	7.21675	8.16199
CTCFL	1.92273	0.000392301	0.00162606	10.0144	8.09171	9.55341	10.8805	11.1932	8.62899	10.6655	10.5646	9.37696	10.7807	11.2097	9.31925	10.5173	10.5359	10.0799	9.6968	10.4697	10.1276	11.4751	11.0683	9.95505	11.1847	11.478	10.5096	11.1868	10.8566	10.7405	10.104	10.6221	9.61145	7.73431	10.4899	10.2321	5.86643	11.0086	11.1671	11.1671	11.1583	9.99747	11.3983	11.0876	11.0841	11.5235	11.7851	8.89178	10.4013
CTD-2256P15.2	0.80762	0.0041797	0.012156	8.47535	7.66773	8.37483	8.59429	9.11287	8.24526	8.91487	9.00038	8.46034	8.73975	9.12523	7.96437	8.37708	8.77908	8.51239	8.36723	8.72334	7.99793	9.24969	9.07417	8.27499	8.71199	9.26661	8.65772	9.30989	9.18378	8.7778	8.14242	8.58875	8.1653	6.82684	8.77908	8.49144	7.91614	8.86026	9.41057	9.0466	9.70979	8.8124	9.36768	9.08018	9.30733	9.50584	9.2648	7.35325	7.902
CTD-2302E22.4	0.894939	1.07268e-05	6.96256e-05	4.83324	3.93831	4.26514	4.45859	4.92096	3.82583	4.65456	4.58025	4.55687	5.11854	4.83583	4.19061	4.64109	4.44893	4.87386	4.74354	4.3218	4.27433	5.04156	4.27813	4.71052	4.81463	5.16808	4.65456	4.49713	5.17275	5.13481	4.86565	4.92437	4.38332	4.56764	4.72725	5.04918	4.00962	5.4993	5.53202	4.84175	6.36926	5.21248	5.05441	5.86044	6.62024	4.97561	4.97503	4.56961	4.90536
CTD-2520I13.1	1.82686	8.49964e-05	0.000434574	8.07443	6.24758	8.30794	8.9398	9.68033	6.48522	8.74359	8.74948	7.45188	9.07784	9.25333	7.12133	8.89151	8.71274	8.29245	7.9691	8.42513	7.687	9.46438	9.1941	8.15353	9.07137	9.61596	8.64118	9.15124	9.28105	8.82212	7.49381	8.18092	7.79841	3.92073	8.52969	8.51636	7.85578	9.04549	9.38204	9.09326	9.46324	9.03654	9.06364	9.40305	9.33827	9.81638	9.44806	6.97024	6.66566
CTD-2587M23.1	0.67884	0.0353655	0.0694859	6.76973	6.09089	6.52396	7.00843	7.59021	6.66714	6.43843	7.05993	6.65133	6.59486	7.35335	6.47943	6.9237	6.891	7.04942	6.7751	6.86712	6.72791	7.49289	7.96411	6.65016	6.92633	8.34039	7.87194	7.15197	7.33557	7.2896	6.69499	6.93564	6.70324	3.13383	7.13159	7.00916	7.29037	7.31608	8.30678	7.76151	7.74085	6.95518	7.10679	6.60777	6.6467	8.01159	8.76821	5.26253	5.67422
CTD-2619J13.13	0.688245	2.1688e-09	3.16669e-08	7.39895	6.7107	7.32741	7.09372	6.99149	7.71736	7.03823	7.29059	7.49267	7.4986	7.2081	8.11239	7.3833	7.27189	7.50634	7.71943	7.46286	7.95454	7.07153	7.25049	7.77166	7.3145	6.87576	7.33904	7.05353	7.53019	7.16681	7.45228	7.61386	7.98617	7.65847	7.32917	7.3713	7.51309	7.43357	7.32108	7.24896	7.03329	7.29895	7.21409	7.11755	6.93311	6.9519	7.05623	7.82329	7.44252
CTD-3064M3.3	1.10332	0.0172822	0.0389765	10.3372	9.23384	10.0095	10.9202	11.6188	8.96035	11.0154	10.9254	9.93355	10.8927	11.5483	9.41728	11.0475	11.2268	10.5123	9.96524	10.8428	10.0028	11.7888	11.3983	10.2896	11.2081	12.0569	11.4586	11.5483	11.3583	11.0639	9.977	10.2251	9.53519	8.89266	10.6129	10.6862	8.95603	11.1035	11.3158	11.2199	11.4299	10.8838	11.7388	11.2395	11.5359	12.0445	11.8681	8.45119	9.14564
CTHRC1	1.75014	0.000229589	0.00102676	10.2035	8.45336	10.6089	8.77296	10.8566	8.20826	9.45696	11.2432	11.8495	10.5105	9.22196	11.8176	9.25385	10.8579	7.15959	9.87184	12.1387	8.16632	10.6828	10.5394	11.9346	10.0623	9.55617	10.3835	10.7461	6.18285	10.5443	11.5674	9.45791	9.79472	9.40514	6.28699	8.5286	10.1774	9.68796	8.55334	9.64934	10.711	11.4361	11.7359	10.7556	10.063	10.8985	10.6816	9.01575	11.1633
CTPS1	0.921431	0.000363157	0.00152487	8.33938	7.41795	7.93671	8.48899	7.51551	7.99387	8.61641	8.59912	8.30957	8.8292	8.25536	8.27611	7.75608	7.78679	7.30919	8.25555	7.53881	8.324	8.45663	8.33975	9.00714	7.95532	7.12295	7.95783	6.93163	6.57172	9.78823	9.13968	8.96069	8.97817	8.50269	8.14548	9.09906	8.7424	8.30204	7.49899	8.00592	8.49071	8.09758	7.37363	9.01128	7.73624	7.13402	7.0922	8.46761	9.79033
CTRC	0.597445	8.85849e-05	0.000450505	7.18607	6.58862	7.24143	6.97137	7.91324	8.10929	7.27053	7.64805	7.22167	6.97039	6.83076	6.91392	6.95237	6.77583	7.09519	6.74494	7.00752	6.95614	6.55932	6.90788	7.23961	6.97861	6.82585	6.84034	6.80953	7.08343	6.9889	7.08685	6.96844	7.25327	7.05562	7.30646	7.23316	7.92498	7.15768	7.17681	7.21675	7.30422	6.74023	6.79447	6.56431	6.81846	6.43423	6.54075	7.46688	7.27632
CUBN	3.55896	1.915e-14	7.43893e-13	9.72828	6.16932	9.9318	10.2598	10.6767	9.5373	10.316	10.2286	9.64512	10.3307	10.632	9.13617	10.2992	10.4249	10.1157	9.73407	10.3636	9.70284	10.5674	10.7991	9.82062	10.3582	10.7885	10.4034	10.4993	10.4598	10.5054	9.67284	10.1535	9.71713	6.27837	10.3852	10.6089	9.38085	10.3952	10.7742	10.7981	10.8512	10.3042	10.7556	10.5123	10.5846	10.6849	10.868	7.88526	8.5149
CWC15	0.748174	0.0119181	0.0288833	11.4106	10.6625	11.1551	11.6529	12.0394	10.8159	11.8378	11.7302	11.0683	11.7419	11.9657	10.4256	11.7824	11.7419	11.6667	11.1918	11.7211	11.1881	12.1536	11.8176	11.4426	12.0445	12.435	11.8819	12.1978	11.9952	11.9747	11.2988	11.4819	10.8798	10.5259	11.773	11.8783	10.8812	11.9577	12.1023	12.0294	12.3169	11.8756	12.2484	12.1181	12.1815	12.3598	12.3656	10.007	11.1106
CWC22	0.855427	4.88819e-06	3.42863e-05	10.1088	9.25332	9.82863	10.4725	10.2772	10.0701	10.4566	10.377	9.92664	10.0498	10.3661	9.74631	9.93355	10.488	10.2278	10.0416	10.5809	9.87184	10.5087	10.6439	10.2329	10.0457	10.655	10.655	10.1301	10.2047	10.4556	9.76168	10.1331	10.1336	9.72671	10.1874	10.0135	9.80949	10.4509	10.6662	10.7309	10.0537	10.3331	10.3371	10.4034	10.327	10.7286	10.537	9.44353	9.87927
CWH43	1.24797	0.00751212	0.0197993	8.21556	6.96759	7.89634	8.56717	9.20344	5.75899	8.75549	8.9386	8.47747	8.6469	9.02067	7.16662	8.79795	9.04455	9.6558	8.38959	8.98737	8.67014	9.1965	8.93078	8.5194	9.00836	9.35009	8.88216	9.4157	8.9552	9.07106	8.4839	8.46811	7.84597	5.86333	8.95031	8.96963	5.30498	8.72334	9.42691	8.85946	9.83361	8.81131	9.07784	9.24864	9.09421	9.1698	9.10952	6.68518	6.95668
CX3CL1	1.20207	2.14026e-05	0.000129582	7.98204	6.77996	8.52792	9.95088	8.11708	7.13516	7.86465	7.04446	8.7958	6.32841	8.52697	6.68018	7.2104	9.24425	7.36354	7.85932	7.73929	7.42799	7.08742	8.17826	8.01838	7.31546	8.16418	8.22917	8.12527	7.03879	8.30794	8.26979	6.96612	9.00411	9.14148	8.25885	8.08927	7.77221	7.92739	7.39935	7.9018	8.57925	8.12385	7.30736	7.52182	8.06109	6.90444	7.31929	6.9951	8.79311
CXCL13	1.32363	0.00386919	0.0114037	6.12253	4.7989	8.59017	6.61518	5.56208	5.00788	8.77108	6.73505	5.20252	4.89211	4.78247	5.82413	4.89103	4.77322	4.81954	7.34082	10.7612	4.71571	5.11951	6.87816	4.97983	5.70008	7.37139	6.77774	5.22428	4.83987	6.43243	5.40728	5.22929	6.86426	6.12394	8.52771	8.76878	5.36988	5.01411	5.40812	4.81882	6.93449	5.69403	7.10168	5.32455	5.49395	5.53365	6.98334	4.89371	5.7553
CXCL17	0.911219	0.00117953	0.00416735	9.38926	8.47804	9.00525	9.49588	9.72218	8.90527	9.97877	9.74688	9.49276	9.48336	9.6816	8.48201	9.57833	9.93471	9.25675	8.9706	9.47657	8.92674	9.84388	9.97023	9.05614	10.3636	10.3984	9.86598	10.0537	9.5432	9.59624	8.97474	9.09738	9.36063	8.87017	9.91037	9.75066	9.20104	9.66122	10.0057	9.82464	9.87621	9.50798	10.088	9.66613	10.6559	10.0354	10.2756	8.0467	8.33411
CXCL5	0.677198	0.0463349	0.0862326	5.13078	4.45358	5.37877	5.30122	6.60441	4.36405	4.87222	4.34468	4.5465	4.6127	4.50941	4.58601	4.83278	5.42299	4.19308	5.89424	5.21752	4.83646	4.661	5.04102	6.29419	5.07528	4.59485	5.02002	4.24612	4.15861	4.56764	6.19481	5.15752	5.19919	5.60915	4.29812	4.41187	4.27813	4.03166	3.85802	4.72942	7.15898	4.50647	4.69579	4.50736	4.50137	3.9877	4.69579	4.83932	7.63172
CXCL8	0.952066	0.000104009	0.000515426	7.90749	6.95543	7.57875	7.97554	8.65726	7.4388	7.7533	6.96407	7.92365	7.79374	7.61715	7.27943	8.11218	8.23897	7.17323	8.32337	8.51781	7.19633	7.66169	9.0689	7.5932	7.66692	7.28533	7.77284	7.95611	7.04562	8.08066	8.5029	7.19141	7.92344	6.43863	7.65287	7.38616	7.60058	7.84382	7.93779	7.79459	8.86567	7.84883	7.67419	7.7286	8.1582	8.16199	7.69573	8.48977	8.88875
CXCR4	1.20688	4.76324e-07	4.23564e-06	9.93802	8.73114	9.53801	9.76624	9.7489	9.39956	9.63627	10.1466	8.87409	9.75432	8.82411	11.3011	9.45791	10.1241	9.3441	8.95206	9.78927	9.95382	10.2004	10.5932	10.3277	9.40591	9.80389	9.58139	9.6563	9.45298	10.4725	10.423	11.3031	10.6231	10.5079	9.26184	9.2591	9.28423	10.4317	9.12353	10.3307	9.86381	10.2004	10.3082	10.9883	9.56969	9.92129	9.99747	9.6087	9.59296
CXorf22	0.807781	0.00556898	0.015439	6.51609	5.70831	6.94154	6.36889	6.56784	7.38665	5.95309	5.72072	6.83635	6.37986	7.07677	5.70055	7.63391	5.90402	6.78011	5.60915	6.25661	7.08099	6.21274	7.22773	6.57017	6.51653	7.67029	7.46504	5.47392	5.89424	6.09811	6.3909	6.46757	6.81269	5.24087	6.28019	7.71873	7.7822	7.86221	7.7635	7.97906	6.33204	7.33591	7.09881	7.02659	7.37387	7.66124	8.26549	5.4582	5.49001
CXorf30	1.13703	0.000134757	0.00064559	7.76093	6.6239	7.19049	8.10517	8.48435	6.45617	8.12161	8.32662	7.21367	8.0489	8.22176	6.47161	7.65007	7.53769	8.69086	8.03587	7.80845	7.88269	8.69717	7.97882	8.07935	8.33485	8.55255	8.84613	8.65954	8.45708	8.53847	7.94208	8.34608	7.37922	5.16713	8.53465	8.4161	6.4455	8.24318	9.38253	8.46834	8.7716	7.6563	8.36879	8.34846	8.16785	8.39906	8.1226	6.18908	7.30975
CXorf31	2.23604	1.67416e-14	6.57027e-13	7.3339	5.09786	7.09593	7.49935	7.89218	7.21959	7.32741	8.41692	6.98035	7.20112	8.37536	6.87959	7.04084	7.39434	8.66852	7.16755	7.23124	7.81826	8.64925	7.76701	6.9652	6.42477	8.34492	7.91936	7.76151	8.69455	8.34683	7.59748	7.24098	7.51794	6.05728	8.12097	7.73273	7.00631	7.027	8.02237	7.09465	7.46631	7.10979	8.25355	7.45715	6.6734	7.51509	8.5327	6.58171	6.77739
CXorf58	0.610905	0.0220401	0.0474525	6.79651	6.1856	6.61266	6.45431	7.06028	7.09351	6.78406	6.97627	6.51694	6.6525	7.02508	6.17411	7.17168	6.75893	7.2089	6.97137	6.64937	6.59038	6.94295	7.73118	6.61495	6.71724	7.32917	8.00404	6.88442	6.94555	6.98359	6.90903	7.14007	6.66947	3.50258	7.74965	7.62588	7.05019	7.08724	7.5298	7.43765	8.65545	7.45018	6.69971	7.28901	7.41619	7.87915	7.10713	6.07358	6.23267
CXXC5	1.47643	7.97988e-14	2.73323e-12	11.3593	9.88291	10.89	11.2324	10.9419	11.2147	11.7851	11.4115	11.5179	11.5428	10.8996	11.4864	11.3413	11.1799	11.5885	11.7153	11.4299	11.3158	11.5855	11.3081	11.3081	11.3138	11.5629	11.6636	11.3047	11.578	11.372	11.5105	11.5629	11.4864	11.3175	11.9384	11.5381	10.2091	11.5381	11.3459	11.3501	11.7952	11.7056	11.7952	12.0445	11.5674	11.6582	11.7621	11.0019	11.6465
CYC1	1.03105	0.00028642	0.00124256	9.80727	8.77621	9.72359	10.5893	9.96669	11.47	8.00685	9.97267	10.1423	10.6499	9.42154	9.24283	9.33048	9.71192	9.19331	10.1477	9.4486	9.8707	10.178	8.7448	9.73538	9.54556	9.34621	8.93703	9.65254	9.8827	9.4742	9.4562	8.97206	10.3699	11.2724	9.1203	8.95345	10.6249	9.52743	9.17122	7.72234	9.96888	9.76113	9.41339	9.01096	8.51781	9.59423	9.51861	10.9243	10.5655
CYLC1	0.696078	0.00450503	0.0129283	7.34631	6.65023	7.66364	7.46668	7.65593	6.50465	7.5972	7.78118	7.5298	7.74165	7.91157	7.09181	7.79352	7.7841	7.47526	6.891	7.91199	7.27151	7.86008	7.98245	7.26135	7.47188	7.92762	7.744	7.98449	7.8305	7.78997	7.17659	7.36629	7.09892	6.78663	7.52848	7.5114	6.945	7.65068	8.1356	7.74725	8.33906	7.88426	7.721	7.85117	7.74165	7.94304	8.09335	6.45253	6.26017
CYP1B1	2.17198	1.04344e-10	1.98289e-09	9.9014	7.72942	9.46923	10.18	10.6806	8.9429	9.95632	10.0982	9.24595	10.0266	10.4265	8.76091	10.1915	10.33	9.74778	11.5235	10.2739	9.48336	10.6635	10.4483	9.70585	10.2321	11.0099	10.2725	10.5978	10.3524	10.3524	9.06636	9.57794	9.20104	7.70036	9.61638	10.0234	8.11651	10.0457	10.6601	10.5695	10.6816	10.3564	11.19	10.4993	10.8669	11.3081	10.9485	8.79606	9.4842
CYP2C19	0.608486	4.76892e-08	5.22321e-07	6.21705	5.60857	6.17867	6.15986	6.67876	6.09235	6.02884	6.10666	6.23424	5.98231	6.04972	6.45751	6.13311	6.55512	6.22074	6.51159	6.25235	6.29146	6.21908	6.13774	6.528	6.8852	6.32859	6.32557	6.40639	6.13735	6.53448	6.42299	6.401	6.53856	6.31388	6.47367	6.33584	6.12871	6.33104	6.67105	6.37836	6.55345	5.92874	5.8559	6.46679	5.85166	6.01994	6.48911	5.91112	6.03978
CYP3A4	0.831259	1.84952e-07	1.7931e-06	9.22306	8.3918	9.3371	9.22598	8.75175	9.38204	9.47385	8.90191	9.8242	9.22255	8.95229	9.66266	9.43833	9.3415	9.55475	9.38772	9.06817	9.49055	8.21846	9.63137	9.56006	9.34932	8.78179	9.77926	8.88186	9.58102	9.46035	9.70106	9.75218	9.62235	9.72717	9.63814	10.2873	9.87927	9.1876	8.49712	8.78541	8.27385	9.34731	8.94896	8.58875	8.95118	8.21027	8.54909	9.21254	8.88755
CYTH2	1.32649	2.13717e-09	3.123e-08	8.89902	7.57253	9.44353	8.97665	9.27417	9.39645	9.01696	8.84055	8.91821	9.25712	9.66266	8.81466	9.10301	9.20475	9.14005	8.4731	9.25759	8.8923	9.31925	10.1102	9.07325	8.91178	9.26107	9.15804	8.97784	9.22598	8.9552	8.5119	8.77415	8.51411	7.11808	8.89019	8.61797	9.08051	9.15463	9.50798	9.32998	9.62466	9.32954	9.02243	9.26695	9.82124	10.0234	8.97976	8.0437	8.56375
CYYR1	2.08601	4.65588e-10	7.74738e-09	8.53105	6.44504	8.9569	8.59604	9.00284	8.6826	8.80522	8.77625	7.76169	8.86595	8.80346	8.21658	8.58304	8.72785	8.30678	8.18092	8.87489	9.27851	9.33157	9.05189	8.90799	8.87583	8.85422	8.27136	9.07048	8.76575	8.6575	7.65345	8.39278	7.73179	7.46444	8.27499	8.3205	8.63418	8.79957	9.16203	9.68744	9.4157	8.98435	8.91727	9.16905	9.21937	9.15804	9.39917	6.87985	7.53441
D21S2088E	1.82987	8.05061e-13	2.24632e-11	7.95007	6.1202	8.17125	8.04112	8.50484	8.18668	8.34655	8.17078	8.30636	8.03265	8.49546	7.9278	8.12277	8.25355	8.21334	8.16382	8.25536	8.11431	8.29834	8.83915	8.11137	8.30884	8.55405	8.44829	8.28076	8.21107	8.29883	8.01944	8.15252	8.07856	6.67475	8.54666	8.40317	7.74592	8.34938	8.49926	8.16632	8.42123	8.16382	8.21935	8.10784	8.23342	8.46898	8.135	7.2512	7.05875
DACH1	1.25681	0.00221037	0.00712198	7.25481	5.99801	8.33928	6.11328	7.0218	7.22455	4.87527	7.56454	5.58006	6.25741	8.34542	5.95243	7.98658	8.04994	8.61225	6.75746	6.31027	8.6993	7.97009	6.77974	6.92453	5.06647	6.52979	6.69421	6.93292	9.76168	7.53441	6.89846	9.12213	6.15056	6.94252	6.66546	7.43189	7.12404	5.82838	5.5646	8.68858	6.70117	7.31251	6.41176	8.45864	7.21494	8.58937	8.29345	5.39143	7.43747
DACT3-AS1	0.862338	2.61184e-08	3.03344e-07	6.6471	5.78476	6.32539	6.52746	7.13082	6.71534	6.07586	6.46026	6.59692	6.61881	6.67901	6.48029	6.45811	6.16796	6.72584	6.72627	6.34547	6.77103	6.5355	6.66183	6.55704	6.42461	7.00651	7.01356	6.76265	6.60621	6.87463	7.0386	7.14804	7.06488	6.54482	7.22725	7.14127	7.18245	7.06336	7.1049	6.90519	6.98795	6.838	7.01591	6.75551	6.90612	7.4763	7.36075	6.00855	6.09837
DAND5	0.865829	0.000779772	0.00293827	7.62343	6.75761	7.38121	8.23293	8.37389	7.37042	7.66304	7.64824	7.71699	7.52827	8.10762	7.22287	8.10889	7.59178	7.78471	7.60978	7.60351	7.63958	8.47707	8.5864	8.03842	7.91874	8.47509	8.68548	8.32116	8.39024	7.80899	6.84705	6.9983	6.22966	6.51223	7.27259	6.88674	7.23046	7.4842	8.86758	8.85396	8.71274	7.80486	8.27906	9.13905	8.30794	8.73474	8.29385	6.33858	7.1364
DBF4	0.706974	0.000196521	0.000894806	8.8991	8.19212	8.70814	9.26847	9.06817	8.99217	8.97603	8.37932	8.63171	8.87977	9.0131	9.41464	9.24827	8.6682	8.44705	9.20235	8.36367	9.13118	8.42397	8.59236	8.59696	8.67068	7.57791	8.46083	8.56222	8.85299	8.77965	9.92343	9.42005	8.37258	8.83186	8.47265	8.5314	8.71547	8.71144	7.68144	9.13118	8.31138	8.95292	8.11137	9.03779	8.91911	8.63494	8.41907	9.21796	9.51906
DBIL5P2	0.783509	0.00562184	0.0155575	8.56538	7.78187	9.544	8.54183	9.09356	9.91561	8.85927	8.64009	8.40602	9.1006	9.26924	8.73105	9.03654	8.95345	8.61466	8.08973	9.10499	8.40632	8.85972	9.80285	9.10346	8.66666	8.89069	8.50673	8.77219	9.03622	8.58961	8.3775	8.81524	8.03501	6.30904	8.88093	8.50108	9.57106	8.87263	8.92674	8.96924	9.03943	9.44596	9.1719	8.94397	9.14887	9.40789	9.28168	7.43786	7.85538
DBN1	0.687954	6.39752e-05	0.00033891	8.54009	7.85213	7.93215	8.73555	7.88864	9.44278	7.71699	8.14506	8.31309	9.02243	8.08082	9.05981	8.84142	8.48781	8.12277	8.63285	8.54811	8.97976	8.7778	8.9791	8.51032	8.47941	8.13388	8.67852	8.34386	8.40043	8.27564	7.87214	8.98003	9.30483	8.65004	8.04175	7.48866	9.2814	8.62021	8.32245	8.38642	7.97764	8.56328	8.27519	7.82816	8.08316	8.48761	8.65929	8.41446	9.63137
Dbpht2	1.55892	4.45974e-07	3.99672e-06	5.17401	3.61508	5.44012	5.00947	5.279	5.44212	5.18329	4.97271	5.09962	5.43229	5.31771	5.15241	4.97858	5.10712	5.23218	4.80733	5.00844	5.19553	5.12127	5.2831	4.91673	4.74247	4.81069	5.20422	4.98593	4.8961	5.00732	4.80879	4.99997	5.30122	10.9081	4.53558	4.92871	5.47363	4.84487	5.09483	5.03728	4.92946	4.67099	4.91413	4.89488	4.92607	5.05931	5.03301	5.64978	5.32563
DBR1	0.687717	0.013364	0.0316433	10.5753	9.88757	10.245	10.7694	11.027	9.37883	10.6338	10.9554	10.1512	10.7078	11.024	9.81638	10.8501	10.7383	10.8849	9.64174	10.6559	10.5702	11.0829	11.0071	10.4934	10.9643	11.1948	10.8243	11.0906	11.1566	11.0169	10.2251	10.4899	10.0427	8.61547	10.6682	10.9474	9.26924	11.2898	11.5032	11.3477	11.8963	11.2165	11.4319	11.6729	11.6756	11.6609	11.3193	9.94431	10.6387
DCAF11	0.672311	0.000116375	0.000568338	9.47726	8.80495	9.20768	9.40869	9.99187	8.64871	9.54477	9.74291	9.28545	9.94881	9.59339	9.22566	9.59567	9.69289	9.72268	9.42867	9.52977	9.35823	9.82918	9.49741	9.40305	9.72314	10.1102	10.1235	10.1369	9.9073	9.98309	9.4734	9.59671	9.69442	9.63723	10.1429	10.2406	8.00288	9.48982	9.67508	9.26107	9.55267	9.56823	9.66613	9.34334	9.49185	9.42295	9.77621	9.62591	9.06851
DCAF12L1	3.00154	2.68406e-11	5.68624e-10	8.3287	5.32716	7.99235	8.81664	9.42258	8.42921	8.52097	8.80103	7.98569	8.9976	9.20162	7.88024	9.01848	8.85324	8.34406	8.05509	8.4273	9.49097	9.36538	8.75839	8.80579	9.61145	9.07048	8.33411	9.41611	9.07417	9.00284	7.59534	8.80184	7.97724	3.4894	8.78483	8.47635	7.1899	8.88513	9.07516	9.19278	9.74688	8.79441	8.90498	9.03283	9.30483	9.42769	8.80752	8.49546	7.30231
DCAF13	0.779064	0.00293002	0.00901666	9.65063	8.87157	10.2748	10.0615	8.88011	9.03565	9.16136	10.5469	9.85802	9.81487	9.52813	10.9883	8.85057	10.0185	9.1991	10.5837	9.63359	10.3082	8.98278	9.31624	10.3067	9.1882	8.43478	8.99942	8.50248	9.39805	9.79424	9.82124	10.2398	10.649	10.709	10.2223	8.99276	10.4757	9.39284	8.15395	8.652	7.94208	9.84388	9.01696	8.67039	9.16006	8.39322	8.69985	10.341	9.84662
DCD	0.896375	0.0151099	0.0349771	7.59955	6.70317	7.01396	8.01389	8.6477	6.58616	8.18092	7.93671	7.50751	8.28851	8.00442	6.5145	7.43165	7.52556	7.55786	7.2908	7.59957	7.3504	8.45142	8.45261	7.39882	8.25072	8.61597	8.60902	8.55768	8.68413	8.22835	7.20649	7.65247	7.00714	4.00172	8.07143	8.24445	6.99526	8.17826	9.01282	8.56488	9.01378	8.16844	8.44643	8.75317	8.5795	9.01128	8.88442	6.26849	6.75152
DCDC2	2.13329	4.65691e-08	5.11522e-07	7.48577	5.35248	8.45663	6.77897	7.1117	9.19782	7.2203	7.06879	7.30792	7.75002	7.73241	7.62425	9.34666	8.47115	8.1358	9.35545	8.49119	9.21755	8.17806	6.07648	8.17501	6.79294	6.55686	7.81118	6.43464	6.45023	7.81008	7.24042	6.43329	7.76275	5.69663	8.26068	6.41335	9.57678	8.28322	6.22033	7.68306	6.27665	6.39247	5.9561	7.02732	5.00947	6.83536	6.65683	7.77184	7.02508
DCHS2	2.17609	9.52765e-10	1.48902e-08	8.61168	6.43559	8.89929	9.08901	9.48128	8.21975	9.0906	8.87734	8.5327	9.01228	9.13315	8.14182	9.0475	9.04806	8.96502	8.66176	9.19369	8.47015	9.19518	9.4673	8.88607	9.01998	9.45987	9.08535	9.02492	9.29064	9.05981	8.66795	8.8292	8.48875	5.57035	8.71944	9.37928	8.40579	9.30368	9.7982	9.4673	10.0754	9.31021	9.07353	9.35892	9.61145	9.68362	9.41538	7.01105	7.90716
DCLRE1A	0.804755	0.0128028	0.0306153	10.5333	9.72857	10.3574	10.7771	11.174	9.39412	10.7967	10.8742	10.341	10.9335	11.1478	9.86317	10.7682	10.886	10.7209	10.0993	10.7587	10.4238	11.387	10.9924	10.5665	11.1121	11.2414	10.9419	11.1136	11.2414	10.9868	10.0348	10.452	9.79278	7.45657	10.8314	10.7167	9.29469	11.256	11.4533	11.5311	11.7584	11.2199	11.372	11.7027	11.6886	11.7796	11.5258	9.55718	10.62
DCTN1-AS1	0.646383	2.62003e-06	1.96481e-05	4.5667	3.92032	4.29938	4.36848	4.76224	4.50224	4.9608	4.73665	4.50033	4.45343	4.77558	4.76862	4.51877	4.59485	4.40969	4.53558	4.58025	4.39306	4.6809	5.21882	4.35895	4.72272	4.81463	4.85296	4.1683	4.807	4.90319	4.77465	4.80454	4.50941	5.50478	4.74033	4.46207	4.29321	4.587	4.50834	4.51877	4.73024	4.68624	4.66344	4.35762	4.72181	4.3962	5.1476	4.13215	4.04887
DCTPP1	0.740783	0.00451175	0.0129441	11.4809	10.7401	11.2179	11.7762	11.8929	11.2268	11.7444	11.7824	11.258	11.6019	12.0108	11.0056	11.8142	11.9204	11.5755	11.372	11.7525	11.2179	12.2879	12.0027	11.3216	11.769	12.187	11.9871	11.9993	11.769	11.6886	11.1918	11.4964	11.0718	10.5165	11.7652	11.9789	10.3539	11.9993	12.2028	11.9993	11.9577	11.9043	12.1338	12.2142	12.0775	12.392	12.8193	10.6907	10.9202
DCXR	0.665666	9.29261e-05	0.000467903	9.58433	8.91867	9.29141	10.5003	10.0982	10.1355	9.66435	9.59671	9.86317	9.97081	9.49992	8.84976	9.73355	9.34666	9.57061	9.8808	9.5678	9.28105	9.87621	9.70327	9.39554	9.66521	10.1866	9.29245	9.87296	10.3255	9.68091	9.59897	9.64934	9.29064	8.61882	9.86317	9.97317	8.63195	9.42453	9.57833	9.55567	10.1398	9.6042	9.89584	9.72671	9.99636	9.86768	9.82243	9.08379	9.04301
DDIAS	0.593374	6.15494e-05	0.000327424	7.47078	6.8774	6.90542	7.48216	7.74911	6.93292	7.86747	7.73368	6.59395	8.17034	7.59091	7.18182	7.30341	7.2383	6.79647	7.59091	7.28728	7.37161	7.2619	6.91447	6.96725	7.7489	7.52884	7.15634	7.87194	7.19032	7.28398	7.54157	7.70988	7.53592	7.52662	7.62566	7.35466	6.67836	7.031	7.03916	7.31589	7.90992	6.81193	7.14265	7.63007	7.3373	7.35597	7.20628	7.83359	7.56877
DDIT3	0.830566	0.0021569	0.00697622	10.3437	9.5131	11.0003	10.2427	11.0431	11.0533	10.9737	10.2959	10.0743	11.0475	11.0503	10.1262	11.0141	10.9323	10.6327	10.0462	10.9254	10.5029	10.9458	11.6127	10.3347	10.4006	10.9934	10.9721	10.7898	10.6983	10.4176	10.0204	10.1915	9.23269	8.21027	10.2487	10.5012	10.3379	10.5259	10.8632	10.868	10.596	10.9654	10.4707	10.6559	10.9629	11.2844	10.6952	9.37584	10.1491
DDN	2.70722	1.93913e-08	2.31441e-07	9.69934	6.99212	9.77562	9.93972	11.0376	8.91754	10.5978	10.4716	9.48596	10.3644	10.2847	8.94075	10.3812	10.306	10.2054	9.67461	10.3455	9.84295	10.7991	10.6191	9.9009	10.5276	10.9269	10.9021	11.1395	10.7156	10.607	10.4	10.4474	9.32422	3.81325	11.0045	11.2618	8.54688	10.0729	10.6837	10.2644	10.923	10.0273	10.2951	10.4852	10.3961	10.3324	10.4654	8.00227	8.19016
DDR1	0.716765	0.000139253	0.000664743	10.8869	10.1702	11.5235	10.382	10.1209	11.5202	11.3755	10.3715	11.5855	10.8231	10.2787	11.808	10.9965	10.895	10.6118	11.3477	10.8985	11.372	10.4575	10.4817	11.4139	10.6279	10.3582	10.7659	10.4607	11.0757	11.0099	11.8276	10.9106	11.2343	10.697	10.9524	10.6231	10.9106	11.0639	10.1223	10.714	10.0963	11.0729	10.0008	11.1358	10.9965	9.89584	9.96148	10.3317	11.2973
DDX20	2.30819	2.0812e-13	6.61083e-12	10.489	8.18086	10.6308	10.7188	11.5258	10.5592	11.1377	10.7807	10.2672	10.9215	10.8452	9.90379	10.8524	10.6874	10.4466	9.9946	10.7505	10.3098	10.8973	11.2304	10.5029	11.0518	11.0757	10.8253	10.9434	11.1273	10.9071	10.0247	10.4817	9.85154	8.454	10.8742	11.0318	9.99636	11.0402	11.1532	11.3238	11.3047	11.1329	11.3337	11.3097	11.1763	11.2377	11.4299	9.55139	10.2278
DDX21	0.695369	0.00038482	0.00160231	10.5032	9.80787	10.6249	10.7149	10.0385	10.8302	10.2732	10.9667	10.4575	10.0735	10.048	10.9299	10.1336	10.7942	10.6338	10.7393	10.8387	10.7373	10.2559	10.0787	10.4925	9.98432	9.76205	9.7517	10.2968	10.0729	10.1363	10.7415	11.3501	11.0671	10.514	10.6356	10.0028	10.2975	10.3778	9.75432	10.4716	9.61005	9.20235	9.59169	10.223	9.94491	10.1186	9.62591	11.1106	10.8655
DDX25	1.02431	0.0197393	0.0434306	9.58839	8.56408	9.38281	10.199	10.606	8.64465	10.0342	10.0287	9.06435	10.1471	10.6221	8.58909	10.0607	10.2321	9.78709	9.36734	10.0491	9.22165	10.8124	10.4221	9.51554	10.2195	10.889	10.3531	10.3967	10.3612	10.2832	9.19369	9.977	9.1063	5.59598	10.048	10.3935	8.80752	10.4671	11.0816	10.8566	10.7393	10.1174	10.306	10.6081	10.836	11.1493	10.7942	8.0344	9.049
DDX39A	0.911247	0.000154847	0.000728543	9.78994	8.87869	8.89671	9.30183	9.49136	9.97877	10.1283	8.86988	9.17844	10.5901	9.99747	9.50504	9.8672	10.1137	8.54566	9.5432	9.18899	9.72164	9.21689	8.91727	9.69028	10.3507	8.73105	8.88119	9.59296	10.6089	10.1075	9.72717	10.6118	10.1081	9.55341	10.0904	9.56369	8.96502	9.44313	9.2129	10.4654	8.32567	9.74822	9.48542	10.4057	10.5855	9.32071	9.29574	9.40912	10.8056
DDX49	0.715342	0.000115195	0.000563295	8.47112	7.75577	7.85667	8.15187	7.96352	9.06566	8.09693	7.8798	8.3552	8.29646	8.74752	8.74677	8.37344	8.29424	7.52721	8.51162	8.13959	8.25447	7.85973	8.09736	8.72227	9.05856	7.75583	8.13014	8.31666	8.05875	8.82115	8.88039	8.85396	8.44643	8.58468	8.30904	8.12178	8.07048	8.29345	8.07769	8.99728	8.01184	8.51706	7.87522	8.5393	9.01096	7.58809	7.88426	8.75839	9.69724
DDX56	0.640572	0.000391211	0.00162213	8.68708	8.04651	8.88216	9.06238	9.16424	8.55405	9.06268	8.56953	8.3365	9.06396	8.94809	8.59551	8.7716	8.6251	8.94397	8.99789	8.90676	8.60084	8.78121	8.97817	8.71572	8.99918	9.4346	8.95799	8.8383	9.1063	8.92618	9.05675	8.99499	8.82264	7.50126	8.84507	9.42124	8.10557	9.05736	9.24213	9.2648	8.91323	8.59107	8.72446	8.73159	8.8158	8.96727	9.035	8.21507	8.21658
DEFB1	2.03612	5.40322e-05	0.000291707	8.63562	6.59949	7.78783	10.9654	8.96129	8.01303	8.74912	8.57344	10.8056	7.07022	6.25152	6.99633	7.83656	9.05084	10.0635	9.1958	8.22811	7.44144	6.48173	8.5041	10.4317	9.35627	10.5232	8.43611	8.15329	6.29273	10.0421	8.08022	8.18668	9.724	11.5962	10.1491	6.76199	7.59239	8.53516	7.95265	6.42131	8.17264	9.39956	8.53371	6.59997	9.97935	6.27979	8.51315	7.5597	9.48196
DEFB114	0.660022	0.000920638	0.00337838	3.66063	3.00061	4.15536	4.16525	3.66943	4.02323	3.55744	3.60188	3.54477	3.97343	3.99984	3.89149	3.70276	3.69339	3.94632	3.54056	3.92073	3.73763	4.09437	3.78067	3.8723	4.15398	3.65988	3.58835	3.52916	3.54056	3.68332	3.78922	3.90224	3.64948	5.47236	4.18199	3.50258	3.9757	3.65988	3.76233	3.74325	3.85301	4.15861	4.24883	3.80833	3.66943	3.79799	3.6565	3.82113	3.5491
DEFB119	1.04792	3.21632e-09	4.51746e-08	6.45909	5.41116	6.6098	6.48029	6.73321	7.20571	6.37039	6.50371	6.04545	6.51966	6.985	6.02466	6.52089	6.74006	6.21567	6.40277	6.66928	6.43652	6.79192	6.78303	6.66411	6.39971	6.98971	6.32576	6.38796	6.61232	6.74301	6.47736	6.48233	6.41418	5.17551	6.53856	6.65037	5.95521	6.62991	6.74671	6.78247	6.94515	6.90372	6.83895	6.67361	6.86069	7.23124	7.40572	6.02728	6.25212
DEGS2	0.696381	1.24539e-05	7.94162e-05	7.40785	6.71147	7.28235	7.35079	7.5982	7.23067	7.59374	7.40381	7.16736	7.43232	7.39434	7.11873	7.21543	7.40166	7.55315	7.10545	7.35993	6.92616	7.63504	7.72257	7.01146	7.04813	7.67756	7.29855	7.68581	7.26098	7.24143	6.88756	6.79255	6.78975	7.00235	7.1486	6.58301	7.14204	7.73869	8.18878	8.12607	8.51517	7.44043	7.07497	8.0275	8.18852	8.23413	7.97663	8.18759	7.10507
DEPDC1	1.52114	3.19709e-07	2.94009e-06	8.9197	7.39856	8.64577	9.23659	9.6042	8.3426	9.51499	9.19518	8.43916	9.34514	9.27217	8.4287	9.42124	9.18999	8.82354	9.12097	9.16826	8.861	9.44278	9.37996	8.96817	9.36967	9.60151	9.19331	9.11824	9.1799	9.39883	9.01196	8.7939	8.5222	7.19989	8.9426	9.26409	8.182	9.22039	9.77621	9.46684	9.31377	9.38169	9.06238	9.56451	9.18862	9.80475	9.49833	7.8764	8.23204
DEPDC1-AS1	0.839073	4.59038e-06	3.23561e-05	4.1885	3.34943	4.38332	4.20142	3.74594	3.76521	4.61768	4.0035	3.74594	4.58802	4.46736	3.66317	4.32989	4.03884	3.77774	3.299	4.05285	3.63187	4.81575	4.48967	3.81842	4.65674	3.67229	4.63146	4.27433	3.34929	4.77117	4.78247	4.12458	4.16687	4.43184	3.82326	3.95937	3.85301	4.01722	3.41004	4.07644	3.98406	4.06839	4.66273	4.1985	3.75397	4.08708	4.05461	3.45098	4.68795
DEPDC1B	1.64308	1.46612e-05	9.19795e-05	7.2545	5.61142	6.68995	6.79093	7.45265	5.98733	7.19012	7.32247	7.24426	7.73352	6.27348	8.57304	7.89904	6.36545	5.63448	7.93963	6.34337	8.50484	7.28879	6.55078	7.17422	5.02963	5.24904	7.09045	7.49969	6.02814	5.97005	7.13021	9.12963	8.63389	6.54402	6.38125	6.81453	5.31771	7.09238	9.20736	6.84548	6.1173	6.65432	6.74098	7.48097	5.24087	7.89235	6.86356	8.1644	8.0895
DEPTOR	0.646348	0.0105224	0.0260951	9.0285	8.38215	9.61688	9.34771	8.38108	9.01378	7.69884	10.1027	9.26371	8.61617	7.99651	9.24632	7.50557	10.1056	8.47265	8.62657	9.41132	8.44705	8.52002	8.67189	10.1436	8.63541	9.15205	8.36562	8.49898	8.29497	8.81741	9.47489	7.72053	9.52601	10.344	9.62365	8.46362	9.68499	9.31662	8.06378	8.11729	9.02525	8.5222	9.07587	9.27821	9.54952	7.98163	8.71547	9.59084	9.50321
DGAT1	0.858774	2.84579e-05	0.000166996	9.36023	8.50146	9.59042	9.20406	9.62054	9.8242	9.43131	9.4006	9.19712	9.85415	9.5499	8.83186	9.36224	9.59671	9.37838	9.0689	9.62544	9.10563	9.69171	10.115	9.50289	9.66453	9.50504	9.4372	9.64984	9.86768	9.17157	8.88687	9.22734	8.87093	9.28206	9.22339	9.06754	10.0028	9.59212	9.44353	9.33606	10.0863	10.0582	9.93294	9.85849	10.1137	10.0537	9.57752	8.63846	9.21358
DGCR11	0.854502	0.000598502	0.00233961	7.95467	7.10017	8.61697	7.93275	8.46034	8.86081	8.37932	7.8415	7.90992	8.35727	8.64667	7.87835	8.22301	8.60259	8.01518	7.71201	8.40731	7.80219	8.63233	9.13251	7.99185	8.05018	8.46472	8.32201	8.23111	8.14506	8.22153	7.71391	7.913	7.62797	6.39519	8.02196	7.79566	8.36389	7.99083	8.52944	8.27208	8.34406	8.61249	8.46615	8.35705	8.61058	8.9961	8.77724	6.96487	7.00875
DGKK	1.51497	2.12591e-08	2.51633e-07	9.08327	7.5683	8.94107	9.42295	9.93805	9.16324	9.58387	9.36927	8.22765	9.87621	9.45021	8.03248	9.78709	9.34545	9.26077	8.86122	9.38479	8.85739	9.64174	9.75528	9.09966	9.57752	10.2022	9.60498	9.60909	9.69503	9.36139	8.81884	8.63868	8.14182	8.34683	8.81912	9.77621	9.36393	9.477	9.88585	9.75528	9.69964	9.8739	9.52213	9.56411	9.55957	10.2685	10.0057	7.64824	8.39345
DHCR24	1.00381	0.000119948	0.000583547	10.3706	9.36681	11.0841	10.9896	10.2708	10.5315	11.0212	10.4176	10.9721	10.2343	9.98779	10.6601	10.7807	10.6991	9.43131	9.69226	9.79932	9.87556	10.7176	10.2636	11.1583	10.9801	10.6941	9.29605	10.2944	9.38541	11.0671	10.3557	9.59719	10.6806	11.1707	9.80997	10.7149	10.0432	10.7156	10.0075	10.6778	8.54737	10.8594	10.0507	11.024	10.2271	9.37434	9.81431	11.47	10.7566
DHRS13	0.7413	0.00013182	0.000633808	9.01041	8.26911	8.66474	9.16798	9.5863	8.19377	8.87072	8.89788	8.68002	9.26924	8.90973	8.79606	9.06919	8.84841	8.96638	8.7107	8.74505	9.10414	9.55139	9.14434	9.02647	9.65254	9.29893	9.25385	10.0982	9.59212	9.28586	9.70809	9.30031	8.83525	8.21006	9.24458	9.20631	8.10252	10.0588	9.45175	9.08967	9.54918	8.62419	9.23785	9.37615	9.20534	9.44174	9.75872	8.40925	8.7107
DHTKD1	0.754767	3.55718e-07	3.24127e-06	8.7819	8.02713	8.75285	8.56251	8.72276	7.67474	8.73555	8.35094	9.24133	8.85857	9.36768	8.97444	8.90676	9.01575	8.31582	9.35181	8.23937	9.00714	8.97698	8.40024	9.27521	9.07048	8.53749	8.62944	8.50843	9.40705	8.97266	8.32116	8.14484	8.1626	8.59183	8.97474	8.38233	8.72358	9.08439	9.15907	8.45639	8.12972	8.56222	8.75808	8.92726	9.13027	9.38507	8.9592	8.5166	8.75839
DIAPH1	0.611849	7.24956e-08	7.59478e-07	8.97075	8.3589	9.14816	8.81912	8.87916	9.34217	9.21358	8.60642	9.48645	9.15497	9.30404	9.06566	8.87093	9.31662	9.02773	8.74359	9.28695	8.77053	9.14043	9.48277	8.89178	8.81602	9.16735	8.89586	8.58737	8.94955	8.94015	8.59338	8.77275	8.92853	9.11628	8.92169	8.861	9.50193	9.03403	9.20344	9.10192	9.14759	9.26587	8.90878	9.08967	9.15836	9.17451	9.15368	9.04397	8.97937
DIAPH2-AS1	1.32787	1.91248e-06	1.48532e-05	7.07621	5.74833	6.8683	7.73542	7.80114	6.56431	7.34208	7.54852	6.50231	7.1411	7.84883	6.54862	7.28038	7.43786	7.34504	7.25018	7.36354	7.08685	7.96334	7.625	7.10654	7.8812	7.96055	7.8147	7.75139	7.87835	7.52157	7.39242	7.53551	7.40858	6.46254	7.6088	7.62389	6.39574	7.12077	7.92163	7.76367	7.95908	7.06488	7.44695	7.84076	7.67869	7.77748	7.87792	5.84839	5.75315
DIO1	0.722399	0.00412492	0.0120196	4.89141	4.16902	3.85568	5.78315	4.77117	3.89345	4.21248	5.02623	5.15329	5.18157	3.60188	3.77173	4.29576	3.94867	4.51562	4.57147	4.41187	4.38091	4.33385	4.85153	4.49077	4.4608	4.88666	5.60271	5.21346	5.25497	5.28435	5.0032	4.9442	4.70496	5.75931	6.54223	6.17346	5.32986	5.35895	4.99765	4.36848	5.43201	5.45179	4.73278	4.86701	4.33582	4.62548	4.88476	4.72808	3.85301
DIRAS2	1.19493	5.33888e-05	0.000288574	6.61313	5.4182	5.80891	6.91024	6.9484	7.10209	6.04005	6.13445	5.66186	6.01746	5.63911	5.39972	7.70336	7.352	6.8833	7.46444	5.26253	6.20792	6.31557	6.94035	5.64978	6.20318	6.77183	8.15505	5.91729	5.60244	7.33508	7.77166	5.4132	6.33919	9.26332	7.16319	5.69029	6.41137	6.67166	6.12569	5.61888	6.26434	6.81866	5.99201	6.48835	6.24254	6.75917	6.22497	5.59902	6.72542
DIS3L2	0.747384	4.27284e-05	0.000236943	8.44868	7.7013	8.2001	8.55175	8.62746	7.30678	8.61697	8.64871	8.64348	8.45071	8.69666	8.18715	8.54519	8.50741	9.20475	8.55925	8.41085	8.58255	8.63389	8.45585	8.51517	8.79468	8.6778	8.02407	8.88935	8.90436	8.73817	8.431	8.81164	8.42123	7.81922	8.99067	8.7489	6.93268	8.70864	8.86595	8.92192	9.3506	8.64009	9.10028	9.07712	9.12665	8.76723	9.00411	8.10517	8.29154
DKFZp451A211	0.868366	9.63151e-08	9.87316e-07	7.44993	6.58156	7.0295	7.58773	7.16793	7.29964	7.06068	7.77923	7.98877	7.53223	7.43568	7.25099	7.77184	8.05737	7.65572	7.31509	7.87036	7.65437	7.00046	6.73172	7.9401	7.49987	6.72301	7.20458	7.12096	7.77129	7.14923	8.15096	7.47233	7.36824	8.45049	7.12675	6.71342	8.37841	7.42411	6.93059	7.35079	7.2552	7.75561	7.28293	7.22413	8.57367	7.18123	7.84997	6.82861	7.17304
DKFZp451B082	2.57255	3.98954e-12	9.78357e-11	9.18641	6.61386	9.63903	9.69503	10.1844	9.52813	9.71403	9.49234	8.65249	9.98993	9.8739	8.87347	9.65122	9.7326	9.17679	8.93162	9.62013	8.86341	9.86232	10.0869	9.40445	9.90904	9.9146	9.53801	9.92712	9.95032	9.65214	8.73737	9.41464	8.36005	7.79196	9.29679	9.22039	8.96565	9.59764	9.90797	9.92842	10.2685	9.87556	9.87446	10.0234	10.3668	10.2507	10.0735	7.95434	8.32245
DKK1	2.43845	5.6159e-09	7.52293e-08	9.28436	6.84591	8.94313	9.48732	10.1928	7.82672	9.72592	9.87126	9.20706	9.75066	9.74688	8.68759	9.66164	9.93237	10.0371	9.14148	9.9135	9.43864	10.2047	9.98047	9.41132	9.82973	10.3612	10.6327	10.382	9.95632	9.85972	9.68409	9.4734	9.03594	7.02929	10.0582	9.73454	7.38455	9.85849	10.6397	9.92129	10.4221	9.60498	10.5502	10.1342	10.0615	10.3232	10.4184	7.83595	8.37417
DLAT	0.592111	8.80891e-06	5.80997e-05	8.67157	8.07946	8.74006	8.68607	8.84232	8.69771	8.55175	8.6691	7.97967	8.58281	9.33894	8.56789	8.9712	8.78716	8.34319	8.68986	8.84763	8.52902	8.87916	9.1228	8.55575	8.57647	9.17644	8.96098	8.5248	8.76159	8.27858	8.82159	8.57165	8.59471	8.67614	8.97231	8.09119	8.38618	8.68132	9.48942	9.35321	8.53011	8.20498	8.29245	8.22483	8.3507	9.07082	9.64	8.61746	8.02297
DLG5-AS1	0.738313	2.02094e-05	0.000122944	7.54304	6.80473	7.39312	7.47387	8.07093	7.31251	7.50991	7.45188	7.48037	7.69248	7.96094	7.28377	7.41105	7.80318	7.51531	7.14573	7.67675	7.35315	8.08397	7.99326	7.29357	7.23943	7.82168	8.23983	8.15207	7.5972	7.62312	7.22067	7.46668	7.45336	6.46136	7.91369	7.55177	7.58901	7.72564	8.17416	7.98658	8.64009	8.27681	8.40339	7.6936	8.2116	8.23674	7.88482	7.09537	7.1531
DLGAP5	2.79326	1.97505e-13	6.29375e-12	8.72977	5.93651	8.36236	8.76409	9.03344	7.80748	10.6191	9.15402	8.83915	10.3557	8.33829	8.96442	9.08967	6.97861	6.22224	9.39377	7.70145	8.88119	8.99789	8.50557	8.12712	9.10346	6.89058	8.01838	9.39994	6.9735	9.54836	8.8645	9.81771	8.45663	7.60235	8.97698	8.94176	7.90553	8.74144	7.19432	8.94867	7.36354	9.37584	8.47509	9.48859	8.13934	9.10597	9.10265	8.84285	9.47063
DLX6	0.625141	0.000526397	0.00209862	6.39935	5.77421	5.86147	6.61395	6.8777	5.72869	6.78685	6.7694	5.76712	7.32074	6.61232	6.17976	6.85445	6.38713	6.09337	6.09193	6.49975	6.03891	6.76175	6.58746	5.82352	6.59653	6.67876	7.37064	6.85724	6.53086	6.41314	6.48252	6.81505	6.2828	5.72425	6.73964	6.35063	6.91148	6.11434	6.80503	6.55471	7.18946	6.08819	6.65292	6.32414	6.39384	6.89242	6.5175	5.99821	6.26451
DLX6-AS1	4.34951	1.13593e-17	8.09662e-16	8.71565	4.36614	8.15762	9.34073	9.7735	7.37064	9.32526	9.60194	8.9484	9.2756	9.46068	7.95995	9.35582	9.2591	9.29394	8.89986	9.19278	8.6575	9.67062	9.53613	8.7693	9.57415	10.0158	9.72967	9.85626	9.88821	9.64984	8.92944	9.10265	8.50374	5.62	9.74688	9.66122	8.02254	9.18694	9.7676	9.39284	9.98838	9.45582	9.26964	9.58102	9.46568	9.64709	9.92129	7.10772	7.30665
DMWD	0.679539	0.00861568	0.022184	9.33496	8.65542	9.30846	9.34111	9.72056	8.84315	9.44513	9.62636	9.2425	9.58102	9.67062	9.05242	9.507	9.63105	9.67821	9.27152	9.64791	9.29283	9.66868	9.87341	9.27077	9.6558	9.78653	9.80873	9.79424	9.88473	9.68877	9.29995	9.41611	9.16826	7.00714	9.60151	9.67327	8.87072	9.8281	10.18	10.0317	10.6991	9.80232	9.99241	10.2016	10.204	10.196	9.97203	8.34492	9.02214
DNA2	1.57619	3.01796e-10	5.21927e-09	8.03016	6.45397	7.64469	8.34092	7.42696	7.48933	7.47134	8.69849	7.7377	8.27409	7.90593	8.93188	7.59641	7.57958	6.72601	8.7175	7.81569	9.14218	8.06723	7.85952	7.91811	8.08105	7.14782	7.8368	7.40092	7.03083	7.92041	8.3339	9.23756	8.13082	8.83965	8.63954	8.29904	6.55576	8.13248	6.31897	7.84483	7.47134	7.89743	7.51174	8.40684	8.15505	8.85927	7.9005	8.11101	8.20229
DNAH12	0.712259	8.26901e-05	0.000424299	6.39066	5.6784	6.93037	6.44195	6.33529	7.27259	6.52396	6.29165	6.43046	6.35961	6.65292	6.49401	6.54862	6.57419	7.48232	6.26349	6.75252	6.35365	6.42842	6.66315	6.30763	6.24921	6.77284	6.66566	5.97271	6.11508	6.25298	6.14476	6.16352	6.06285	5.97816	6.37736	6.4766	7.20929	7.02393	6.86619	6.80647	6.3622	6.71588	6.95152	6.57036	6.73091	7.07252	7.10188	5.85347	5.64251
DNAH14	0.84207	1.76672e-06	1.38291e-05	5.58566	4.74359	4.85088	5.68628	5.66343	4.88666	4.99286	5.68426	4.83407	5.50738	5.55825	6.06676	5.28392	5.1876	4.83407	5.22209	5.36988	5.1234	5.82441	5.00788	5.22681	5.49237	5.51683	5.83407	5.25064	5.28186	5.20422	6.30957	5.72453	5.57435	5.89638	5.07124	5.21919	4.98524	5.84866	5.42131	5.19919	5.5205	5.49603	5.5244	5.49173	5.62706	5.77303	6.04117	5.90301	6.14216
DNAH17	0.725572	6.07556e-05	0.000323502	7.07388	6.34831	7.53019	7.04301	7.44577	7.5721	7.16681	6.95827	7.21292	7.45282	7.30065	7.19532	7.3131	7.4024	7.11936	6.66806	7.26361	7.01416	7.33508	7.51118	7.10688	7.13141	7.16437	7.0109	7.26652	7.52639	7.058	6.76961	6.78725	6.69897	7.75031	6.86526	6.66649	8.10596	7.42239	7.26822	7.3145	7.25226	7.69002	7.17828	7.484	7.76897	7.59123	7.18282	6.32399	6.56939
DNAH6	0.727156	1.51368e-06	1.20379e-05	7.26159	6.53444	7.51288	7.29021	7.33364	7.2816	7.29964	7.33649	7.47811	7.41914	7.4982	7.0812	7.16534	7.41776	7.37335	7.40915	7.26999	7.23342	7.3232	7.5873	7.4585	7.09278	7.21112	7.50456	7.00825	7.43549	7.42489	7.24426	7.4154	7.38061	7.77944	7.52803	7.47874	7.1533	7.59599	7.77146	7.60861	7.84923	7.24827	7.34583	7.29435	7.38474	7.46198	7.30629	7.00119	7.30518
DNAH9	1.04728	1.89771e-06	1.47585e-05	6.82653	5.77925	6.68363	7.1706	7.13098	6.37714	7.13594	7.16612	6.49768	7.15677	7.16736	6.04515	7.15291	7.1533	8.45917	6.67533	7.12361	6.75055	7.20095	7.04144	6.9837	7.37021	7.12209	6.89134	7.08704	7.21554	7.07559	7.12404	7.13293	6.14198	6.56574	7.2458	6.88384	6.05798	7.27246	7.21494	7.06602	7.30481	6.94779	7.19083	7.66106	7.275	7.21575	7.27114	5.63934	6.15966
DNAJA1P4	3.38053	5.46864e-11	1.0966e-09	9.1273	5.74677	9.28241	9.96259	10.6387	8.09515	10.0635	9.94881	8.67141	9.81771	10.1355	8.20429	9.72056	9.9318	9.2899	8.80969	9.81487	8.64009	10.4716	10.3307	9.31139	10.1822	10.6029	9.12418	10.3425	10.3067	9.75733	8.90878	9.1023	8.23029	6.79327	9.44474	9.21014	8.12712	9.82196	10.3107	10.1216	10.8621	9.99187	10.7967	10.324	10.4986	10.975	10.9408	7.09892	7.62132
DNAJA3	0.905884	0.00134743	0.00468072	10.6538	9.7479	10.0944	11.0318	11.4299	9.89973	10.9046	11.1598	10.2796	10.8705	11.3395	9.82196	11.1152	11.2249	10.873	10.2479	11.0582	10.3852	11.7796	10.84	10.6611	11.0757	11.7236	10.9188	11.5334	11.3678	11.2066	10.2914	10.5222	9.79725	10.3396	10.9868	11.0702	8.77134	11.2658	11.3678	11.4026	11.6041	10.8046	11.6465	11.5629	11.6188	11.8783	11.8963	9.91749	9.78325
DNAJB11	0.745547	0.00820118	0.0213255	11.0231	10.2775	10.7101	11.4819	11.7263	9.67236	11.4234	11.4449	10.9766	11.0598	11.8724	10.8046	11.4724	11.7153	11.1002	11.1067	11.5826	11.1583	12.3782	11.557	11.4611	11.2785	12.2762	11.4115	11.8419	11.407	11.494	10.6049	10.7942	10.9599	9.69919	11.3216	11.2128	10.2265	11.2451	11.7388	11.0199	11.1314	10.8219	11.6916	10.9474	11.0598	12.0569	12.2538	9.77766	10.658
DNAJB13	0.980052	0.000282781	0.00122866	8.39709	7.41704	8.39175	8.45237	8.90831	8.45941	8.56375	8.38859	8.30035	9.00836	8.7175	7.73947	8.36389	8.5022	8.38012	8.55175	8.66068	8.0878	8.77504	9.01998	8.50181	9.0213	8.97444	8.82574	8.83125	8.89847	8.77698	8.46856	9.00655	7.96791	6.35404	8.79761	8.50131	8.14484	9.04785	9.12629	9.15804	9.26409	8.71382	8.84406	8.92406	8.98797	9.21689	9.10535	7.25426	7.65437
DNAJC2	0.611923	5.38326e-08	5.82084e-07	8.70456	8.09263	8.87489	8.94198	8.71223	8.68312	8.77465	8.48106	9.03594	8.96565	8.91754	8.72446	8.39509	8.79468	8.75549	8.33952	8.88825	8.41971	8.34588	8.59312	8.58875	8.91911	8.74291	8.54958	8.45142	9.16358	8.74948	8.94347	8.56557	8.37954	8.9964	8.8292	8.82626	9.18453	8.68759	8.40273	8.73817	8.18969	8.5029	8.55669	8.6251	8.91941	8.2423	8.2396	8.87159	8.83548
DNAJC5B	0.713253	8.53095e-09	1.09903e-07	7.53541	6.82216	7.67986	7.49172	7.69129	7.74381	7.60581	7.64723	7.52012	7.81905	7.59679	7.53551	7.41253	7.66573	7.39609	7.69992	7.77981	7.49557	7.58075	7.98405	7.39935	7.60823	7.75858	7.64874	7.60366	7.50833	7.53592	7.27788	7.60158	7.44634	8.04055	7.65611	7.69486	7.62661	7.47008	8.02717	7.68366	7.84322	7.56996	8.21205	7.62287	7.46215	8.26698	7.94246	7.13041	6.94756
DNAL4	1.04849	0.00270375	0.00842804	10.0617	9.01317	9.83227	10.5951	11.0285	8.67358	10.7844	10.3693	9.77251	10.7566	10.7438	9.22942	10.6601	10.3113	10.4249	10.2022	10.3796	10.0241	10.8927	10.6644	10.115	10.7176	11.0954	10.5202	10.886	10.9158	10.889	9.87766	9.89266	9.41288	9.17087	10.5054	10.4966	8.3552	10.629	10.8289	10.7032	10.89	10.5126	11.2165	10.9524	10.5628	10.8717	11.2898	8.59962	9.38738
DNASE1L3	0.638067	0.00909714	0.0231785	7.49389	6.85583	7.69742	7.54907	8.015	7.73179	7.58842	7.69552	7.60366	7.76151	8.07769	7.27923	7.79544	7.67547	7.51036	7.20339	7.72027	7.34828	7.9483	8.34519	7.33959	7.68065	8.02431	8.05018	7.83946	7.83359	7.68306	7.15936	7.45131	7.23921	6.79664	7.5597	7.79142	7.68226	8.08191	8.44621	8.08801	8.56375	7.85538	7.96272	8.01133	8.17285	8.54958	8.46834	6.30351	6.41897
DNMT1	0.651694	0.0125016	0.0300347	10.2561	9.6044	9.88473	10.1529	10.0462	11.7888	11.174	10.0342	10.8754	10.4925	10.616	10.8754	10.6991	9.50364	9.11692	10.6662	9.33523	10.4483	9.67773	9.36063	10.0792	11.0336	9.34848	10.1895	10.16	8.27258	10.3693	10.3976	11.2015	10.5259	9.91749	10.0293	10.4265	10.3677	9.84714	8.73789	11.024	8.76878	10.2865	9.70475	10.2825	9.76071	8.92618	9.00251	10.1921	10.9348
DNMT3B	0.76595	2.82404e-06	2.09991e-05	9.26931	8.50336	8.80318	9.16532	9.06475	8.41571	9.5819	9.45175	9.02741	9.67983	9.34577	9.4673	9.24071	9.4742	8.94955	9.40825	8.97206	9.61005	9.37696	9.58304	8.9706	9.51781	9.15165	9.35181	9.7489	9.32642	9.69063	8.74677	9.71537	9.71403	8.9589	9.12447	9.45298	8.99241	9.34111	9.39645	9.2436	9.59764	9.72218	9.80536	9.50193	9.58874	9.78277	10.0969	7.80899	9.51403
DNPEP	0.721546	0.001945	0.00639299	10.3002	9.57862	9.93115	10.5702	10.7002	9.62716	10.3034	10.7461	10.1443	10.2278	10.5846	9.74934	10.3232	10.3484	10.5286	10.1124	10.4352	9.98562	10.5636	10.5921	10.1594	10.6627	10.8046	10.7032	10.8208	10.7716	10.7649	10.1443	10.2427	9.89695	8.49241	10.9173	10.7341	9.23014	10.6097	10.8669	10.9046	11.249	10.5674	10.8914	10.8873	10.8996	10.8276	11.1081	9.79666	10.0254
DNTTIP2	1.68477	2.11339e-06	1.62372e-05	11.7549	10.0702	11.1983	12.0514	12.3103	10.0409	12.0514	12.1711	11.5603	11.8963	12.2607	10.9419	12.2142	12.2265	12.0874	11.5826	12.0775	11.6756	12.807	11.9657	11.8312	12.3656	12.8991	12.22	12.7308	12.3852	12.4606	11.6188	11.7331	10.9254	9.99969	12.1488	12.0929	9.78472	12.5758	12.8453	12.5454	13.0261	12.5259	12.9501	12.9946	13.0986	12.9788	13.0986	10.5443	11.4046
DPEP3	1.26166	0.00189762	0.00626982	8.62259	7.36093	8.15483	9.14564	9.39917	8.32872	8.88801	8.68607	8.00568	8.69585	8.84636	7.72644	8.76632	8.84377	8.62391	8.30358	8.75492	8.10501	9.30917	8.92598	8.27611	10.0416	9.45915	9.77659	10.2133	9.06817	9.035	9.63314	8.40602	9.31624	7.19213	8.80641	9.06475	7.18379	9.86886	9.42616	9.65214	9.47988	8.69792	9.37883	9.45095	9.08379	9.41388	9.2795	6.41859	10.6748
DPF3	0.651444	0.0126527	0.0303453	8.11179	7.46034	8.32591	8.42198	8.72972	7.88766	8.64925	8.32473	8.09916	8.63494	8.5222	7.71699	8.33829	8.32933	8.47509	8.0995	8.35387	7.99146	8.41039	8.86341	8.12885	8.4111	8.71627	8.68933	8.44203	8.46541	8.48875	8.10538	8.29704	8.11708	6.885	8.46307	8.71515	8.24963	8.45161	8.9592	8.63069	8.89302	8.69223	8.74531	8.42534	8.5314	8.78067	8.97386	6.81193	7.40333
DPH2	0.641028	1.96312e-05	0.000119872	9.05854	8.41752	8.5393	8.77248	8.94896	8.88338	8.99217	9.01483	8.41223	8.95493	8.90709	8.74589	9.23051	8.934	9.0633	9.44938	9.0283	9.02402	8.95263	8.84258	9.19076	8.96283	9.1372	9.86381	8.95831	9.0064	9.74579	8.73789	9.29716	9.21358	8.71042	9.39445	9.45054	8.39252	9.31288	9.285	9.45582	8.98308	8.6575	9.8707	9.88123	9.99517	10.0002	8.8896	8.80266	9.14887
DPH5	1.84141	3.00326e-11	6.31567e-10	10.9206	9.07924	10.3462	11.1377	11.5011	10.1429	11.0169	11.3047	10.4757	11.1413	11.387	10.2465	11.1998	11.0729	11.2451	10.697	11.1093	10.873	11.557	11.0937	10.8742	11.4405	11.7525	11.5105	11.5032	11.5381	11.4635	10.5012	10.9924	10.3214	8.79912	11.2214	11.3518	9.4842	11.5085	11.7481	11.6293	12.0147	11.3771	11.6127	11.8996	11.7917	11.7331	11.9462	10.2238	10.6816
DPH7	0.679006	0.00671676	0.018046	8.79993	8.12092	9.53986	8.91234	9.04368	9.52743	9.26266	9.05824	9.00586	9.43338	9.36734	9.09421	9.09284	9.13382	8.70068	8.42074	9.16905	8.37258	9.1988	9.99241	8.87017	9.09554	9.37732	8.90405	8.95713	9.08082	8.90498	8.39778	8.82544	8.12544	9.28459	8.94313	8.74648	9.1876	9.00439	9.33674	9.26519	9.59719	9.37305	9.13315	9.18694	9.65444	9.66471	9.30331	7.21905	7.8344
DPM3	0.746741	0.00403565	0.0118137	9.45072	8.70398	9.1394	9.61554	9.58446	10.5771	9.04549	9.26785	9.23438	9.12733	7.95932	9.47063	10.3804	8.48686	9.58909	9.56163	7.80919	10.1324	8.88909	9.40705	8.69771	9.59465	9.30733	9.17951	9.15431	10.5789	9.05423	9.75622	9.2588	10.1223	9.87766	7.80237	8.81912	9.23269	9.10125	9.08215	8.20322	9.79424	9.83361	8.59551	9.94077	10.1968	8.628	9.28223	9.36139	10.0787
DPP3	0.870315	8.59175e-10	1.35572e-08	9.47153	8.60122	9.5412	9.32263	9.32755	10.341	9.90168	9.21466	9.23233	9.30696	9.69724	9.10414	9.38479	9.30404	8.69009	9.16798	9.44353	9.31558	8.95375	9.21221	9.15205	9.75872	8.88011	9.52777	9.44596	8.65361	9.18632	9.77926	9.80437	9.84072	9.37116	9.86598	9.1882	9.74391	9.72442	9.10158	9.37732	9.512	9.78325	9.13382	9.58545	9.51906	9.13968	9.23342	9.15368	9.81133
DPY30	0.698716	3.81143e-09	5.2724e-08	9.88743	9.18872	10.5412	10.0513	9.66613	9.95434	9.38962	9.73355	9.57996	9.90028	10.0664	9.9946	9.97935	9.94754	9.9146	10.1163	9.50455	10.2386	9.73538	9.41611	9.86019	9.75528	9.6587	9.1958	9.68877	9.67284	9.773	10.537	10.164	10.3317	9.74033	9.96098	9.77659	9.69442	9.77562	9.59084	9.46613	9.58996	10.0843	9.70676	9.47657	9.96042	9.45338	9.66921	9.914	9.85849
DQ583756	1.1118	0.0120186	0.0290899	8.98134	7.86953	8.68335	9.38999	9.86932	8.19557	9.39246	9.5925	8.84205	9.38578	9.85626	8.29271	9.43939	9.62054	9.45462	8.81074	9.55093	8.93797	9.94881	9.9519	9.23269	9.54358	10.0607	10.0309	9.72442	9.65826	9.57883	8.99067	9.1958	8.45768	6.66411	9.74438	9.61441	8.66594	9.72056	10.4446	10.036	10.3828	9.29538	9.94257	10.1223	10.1086	10.2495	10.3708	7.19707	7.7942
DQ586822	2.29369	4.94339e-11	9.97397e-10	9.82665	7.53296	9.27743	10.2636	10.5636	7.94192	10.1363	10.2701	9.70809	9.94754	10.5054	8.78039	10.1708	10.0912	10.3961	9.94374	10.1553	9.9135	10.6279	10.1056	9.86119	10.5359	10.7577	10.4654	10.7188	10.6874	10.468	10.01	10.413	9.82544	8.2644	10.8962	10.4834	7.78962	10.1449	10.8375	10.5846	10.9215	10.0735	10.9269	10.4352	10.5096	10.56	11.0212	8.58661	9.49631
DQ592442	1.34393	9.40724e-15	3.87118e-13	8.32882	6.98489	8.63389	8.04153	8.40252	8.97881	8.28851	8.17894	8.16178	8.38393	8.45161	8.49092	8.38556	8.562	8.6101	8.5913	8.33349	8.24906	8.5531	8.96442	8.32337	8.35836	8.28605	8.465	8.7395	8.55646	8.42605	8.56789	8.16507	8.07835	7.16572	8.56579	8.68335	8.9964	8.3703	8.80127	8.69455	8.44028	8.33257	8.77807	8.32288	8.42817	8.45793	8.67979	8.32311	7.65457
DQ599616	0.681038	1.14286e-07	1.15345e-06	6.812	6.13096	6.84328	6.48762	6.79583	6.97963	6.91267	6.28903	6.80772	6.3231	6.87536	6.5229	6.65899	7.01591	6.45041	6.71237	6.87033	6.83553	6.60227	7.46085	6.71423	6.44908	7.21594	6.64608	6.64976	6.73207	6.59209	6.62946	6.58357	6.48233	6.76175	6.94899	7.07851	6.8696	6.96744	7.50497	6.94469	5.97162	6.98099	6.5808	6.8777	6.71701	6.98242	7.13988	7.38309	6.63889
DRD5	1.34667	0.00126567	0.00443069	8.59473	7.24806	8.53655	9.24283	9.54787	7.93715	9.0689	9.22671	8.07913	9.31446	9.50111	7.66241	9.01042	9.09675	8.82777	8.39406	8.94525	8.62721	9.44899	9.31803	8.4871	9.36538	9.9674	9.73538	9.23438	9.44136	9.14292	8.67407	8.89205	8.22196	6.54789	9.26847	9.50455	7.78804	8.92051	9.46478	9.39377	9.42005	8.88011	9.33071	9.43037	9.38578	9.47294	9.74934	6.99813	7.43326
DSCR4	0.631632	0.00530761	0.0148403	7.42223	6.79059	7.24764	7.34305	8.34281	6.33343	7.01512	7.77545	6.95518	7.56027	7.78367	6.54596	7.37863	7.20265	7.63548	7.37178	7.42257	7.40016	8.29939	7.55988	7.02333	7.79107	7.97863	7.80919	8.72358	7.41213	8.30358	7.26533	7.54269	7.29934	6.12251	7.89904	7.45774	6.86672	7.2619	8.47683	8.99918	8.59017	7.41354	7.95953	7.77674	7.78574	8.43892	8.21699	6.69837	6.8499
DSTNP1	0.896986	6.36549e-05	0.00033737	7.9444	7.04741	7.61627	7.69025	8.21677	7.81802	8.00592	8.12862	8.28163	7.92679	8.28399	7.64874	7.82451	8.08886	7.96479	8.05553	7.8653	7.9294	8.55007	8.50577	7.66241	7.90326	8.91669	8.63892	8.17481	7.96038	8.33485	7.96952	7.80198	8.01559	6.47177	8.44983	8.81664	8.10693	8.3203	8.9359	8.56514	8.66618	8.41314	7.95154	8.49202	8.22874	9.10093	9.05736	7.04247	7.22669
DTL	1.78344	2.56326e-09	3.68851e-08	7.2723	5.48886	7.15936	7.79925	6.98593	6.80647	7.46519	7.00119	7.01287	7.78832	7.22455	7.30551	7.36586	6.70608	6.51339	8.12623	6.11373	8.49024	6.91923	6.76961	7.78907	7.47118	5.66701	7.53105	6.93001	6.09362	6.62735	7.22949	8.10784	6.94332	7.50634	6.79192	6.98553	6.56266	6.75418	5.61157	6.56266	6.46679	6.54075	6.73988	7.51288	6.04618	8.10072	6.7444	7.63923	7.71469
DUOX1	0.743289	4.08055e-07	3.68129e-06	6.96994	6.22665	6.8803	7.03916	7.0876	7.07621	6.87899	6.80484	6.66611	6.84847	7.17913	6.47007	6.8803	6.91447	7.37103	6.95389	6.82231	6.80847	7.21476	7.09181	6.77083	7.09501	7.39935	6.82353	7.0361	7.19532	6.95652	6.78191	6.6313	7.02314	6.0652	6.7408	7.05313	6.91337	7.92268	7.33862	7.08028	7.6092	7.42878	7.22813	7.42376	7.78699	7.45188	7.75792	6.3227	7.02197
DUOXA1	1.05625	2.07107e-10	3.69915e-09	7.19391	6.13765	6.61881	7.29037	7.74434	6.48543	7.25752	7.0609	7.16681	7.2408	7.38204	6.47925	7.15697	7.04724	7.07401	6.8982	7.15032	7.12042	7.5296	7.38537	7.02623	7.75093	7.52827	7.8372	7.94417	7.66304	7.34102	6.95945	7.20207	7.3466	6.77206	7.3294	7.53287	6.39402	7.66671	7.78887	7.22898	7.52702	7.63672	7.69317	7.52259	7.57266	7.64504	7.93923	6.69933	7.0042
DUSP10	0.781926	2.35968e-05	0.00014126	7.58452	6.80259	7.68782	7.82799	7.27923	8.07892	7.83556	7.6993	8.21419	7.56507	8.21006	7.47058	7.52534	8.02956	7.54229	7.59748	7.58491	7.57153	7.73352	7.78282	7.64043	7.63978	7.79841	7.65267	7.44596	6.97762	7.69658	7.66968	7.41673	7.10545	8.30817	7.60722	7.46425	8.42376	7.99288	7.88601	7.7822	7.82269	7.83783	7.98957	7.97377	7.87317	7.95219	8.49976	6.69272	6.93268
DUSP18	0.811365	0.0104438	0.0259424	8.92119	8.10983	8.46385	9.17388	10.0075	7.77507	9.48196	9.31288	8.96871	9.14257	9.49631	8.24342	9.36171	9.47735	9.54787	9.128	9.35181	9.06201	9.55093	9.54523	8.93643	9.45175	9.7747	9.76668	9.80437	9.57189	9.52977	9.33894	9.27743	8.87916	7.20401	9.6587	9.77203	7.57577	9.19209	9.80949	9.31446	9.78225	9.15945	9.48859	9.28241	9.51054	9.44278	9.46842	7.61715	7.97051
DUSP23	1.68049	4.49597e-09	6.11944e-08	11.3601	9.67963	10.6266	11.3238	11.7087	10.4689	11.5284	11.5062	11.3894	11.2165	11.6972	10.651	11.641	11.5755	11.8047	11.4161	11.5652	11.4656	11.7621	11.4964	11.1983	11.6886	11.9993	11.9346	11.9281	11.7584	11.6555	11.3544	11.3963	10.9524	8.00889	12.0682	12.1286	10.4784	11.9247	12.2762	11.8247	12.6135	11.9346	12.2265	12.1023	12.0929	12.0775	12.22	10.7042	11.3193
DUSP9	0.60464	0.0128054	0.0306153	8.08635	7.48171	7.51794	8.24738	8.68858	6.64591	8.25616	8.73604	7.49502	8.66722	8.33764	7.17812	8.2995	7.89568	8.00974	7.65363	8.01421	7.69618	8.60623	8.2202	7.83501	8.59718	8.20098	8.43241	8.93054	8.92025	8.35812	8.23274	8.21525	8.14755	6.65292	8.29404	8.68811	6.43169	8.00384	8.51799	8.57722	9.13871	8.8003	8.90709	8.87072	8.6568	8.5579	8.6469	7.63216	8.04194
DUXAP10	4.15985	1.04672e-22	2.13829e-20	9.28616	5.12631	9.00073	8.64899	9.75432	9.02243	9.85154	9.74534	8.73083	9.81339	9.55429	9.82702	9.82617	9.68362	9.04174	9.33307	9.54167	9.75832	9.52743	9.9119	9.99919	9.18961	9.1694	9.80997	9.53388	9.50584	9.53388	9.04174	9.4067	9.07652	5.22465	10.1008	9.68981	8.78624	9.83904	9.97149	10.4385	9.7005	9.49136	9.79882	9.55771	9.71761	9.94631	9.59169	7.79624	8.47044
DYRK2	0.699646	0.000113211	0.00055478	8.55647	7.85683	8.74192	8.54258	8.17987	8.46185	8.39322	8.83329	8.50625	8.14094	8.61517	9.21689	9.16203	8.81884	8.54493	8.81692	8.79421	9.33347	8.65984	8.26092	8.7887	7.96314	8.3443	8.42265	8.31291	7.61187	8.64977	8.69112	9.0466	8.39839	7.86629	9.13686	7.45871	7.9559	8.01379	7.76426	8.28851	7.67694	7.86387	8.61824	8.99148	7.56395	9.29173	8.35791	8.34519	8.88039
E2F1	1.13258	1.05212e-05	6.84266e-05	9.68213	8.54955	9.34577	9.47569	10.278	8.85083	9.88023	9.97763	9.45582	9.72164	10.1034	9.07387	9.86071	9.92712	10.1094	9.45298	9.8367	9.57106	10.1844	10.2541	9.70254	10.1255	10.2614	10.1477	10.4352	10.3051	10.1679	9.83361	9.7951	9.45217	7.94165	10.2271	10.2717	8.87916	10.186	10.5969	10.4834	10.6828	10.0324	10.2598	10.3531	10.3993	10.5469	10.3812	8.934	9.33409
E2F3	0.849435	9.31616e-07	7.76233e-06	10.5243	9.6749	10.9948	10.3135	10.6816	10.6738	10.8038	10.4309	10.2636	10.4493	10.991	11.1456	10.7373	10.8938	10.3516	10.6239	10.7991	10.8475	10.8538	11.1213	10.6211	10.7461	10.5305	10.7733	10.5685	10.5771	10.724	9.93859	10.44	10.0743	10.1429	10.5999	10.2896	10.6635	10.8001	10.7844	10.7855	11.0921	10.991	10.8046	11.0921	11.3193	11.0702	10.7438	9.59897	10.3715
E2F4	0.879571	0.0154215	0.0355583	10.9662	10.0866	10.4147	11.2165	11.6756	9.59042	11.1868	11.5105	10.8067	11.0254	11.7584	10.1807	11.3031	11.4276	11.407	10.7577	11.3081	10.8111	11.9577	11.4912	10.9323	11.5129	11.9747	11.5403	11.811	11.5885	11.5403	10.7505	10.9372	10.3468	10.1301	11.5452	11.3812	9.75622	11.6609	12.1077	11.8312	12.4213	11.5129	11.9908	12.0569	11.9952	12.1338	12.3598	9.60823	10.3353
E2F7	0.836507	0.000245306	0.00108729	7.21045	6.37395	7.67887	7.89634	6.37039	6.42176	7.61587	6.62753	7.1706	7.49917	6.7207	7.42755	6.94899	6.93851	7.28312	7.8207	8.21507	8.21378	7.0506	6.83033	8.11981	7.07733	6.46199	6.61518	6.94272	6.48588	6.53426	7.86992	8.38793	6.77011	6.704	6.87463	6.94154	5.912	6.38507	6.54014	6.62676	6.20536	6.9106	6.69797	7.39456	6.37799	8.07892	6.98992	7.0214	7.44526
E2F8	1.94636	1.27213e-09	1.94043e-08	8.29941	6.35305	8.1527	8.348	9.07259	7.03041	7.51288	8.9179	8.4023	9.41642	7.9094	9.67166	8.02407	7.54332	6.70574	8.16715	7.04105	8.91642	8.25744	7.09852	8.47813	9.17705	7.18629	7.2203	8.2114	6.75515	8.65226	9.03565	8.75926	8.27385	8.97603	7.30863	8.87212	6.65538	8.01348	7.32798	8.14182	7.36787	8.6682	7.40636	8.05634	8.52532	9.02647	9.01128	8.4709	8.89205
EBF1	0.946343	0.00032838	0.00139887	7.48969	6.54334	7.2203	7.85095	7.79566	6.13501	7.80728	8.02297	7.57305	7.84978	7.72999	6.79255	7.7385	7.87959	7.98489	7.84236	8.02917	7.43509	7.91067	7.83501	7.61821	7.91369	7.84403	8.37582	7.88102	7.89089	7.7942	7.84017	7.65887	7.10036	6.57318	7.81221	8.10632	6.3662	7.94033	8.39969	7.9942	8.66525	7.89089	8.09895	8.19614	8.11278	8.03204	7.92897	6.09169	7.37256
ECSCR	0.85475	1.22097e-09	1.86986e-08	7.60347	6.74872	7.61694	7.66026	8.00267	7.23521	7.96188	7.80706	7.6705	7.91067	8.01686	7.23594	7.79841	7.86143	7.69573	7.58406	8.06315	7.63028	7.81761	7.9555	7.67675	7.8496	8.1626	8.27302	7.77631	7.79272	7.93194	7.6746	7.9872	7.68425	7.36586	8.00568	8.1527	7.3232	7.58469	7.91027	7.55449	7.46386	7.45336	7.72157	7.60158	7.71391	7.74085	7.73056	7.0628	6.96487
ECT2	1.50898	2.10806e-08	2.49779e-07	8.51589	7.00691	7.89402	8.80318	7.72157	7.90475	9.48596	8.33887	9.05118	8.7601	8.92079	10.1216	8.75005	7.84997	7.5713	9.40139	8.30381	9.78823	7.86591	8.22614	8.6936	8.30982	7.61171	7.98898	7.85865	7.00935	8.51239	8.82187	9.00439	9.34848	8.67385	8.22242	7.91457	7.69618	8.296	7.69025	7.94099	7.14429	8.26402	8.04414	7.7986	7.79292	8.218	8.40632	8.34114	9.08967
EFCAB1	1.46754	3.74716e-11	7.75882e-10	7.74919	6.28165	7.53145	8.20763	8.21356	7.25611	7.94813	7.96768	7.84256	8.02039	7.99462	7.19141	7.97308	7.88619	8.17437	7.65947	7.77724	7.56274	8.06045	8.12097	7.7389	7.90839	8.10806	8.03414	7.87011	7.99064	7.99917	8.03587	8.17942	7.86809	5.9793	8.1358	8.4275	7.14186	8.21126	8.52407	8.26511	8.3264	8.05083	8.21084	8.30591	8.31692	8.14737	8.59017	6.89408	7.25327
EFCAB11	0.66282	0.0019967	0.00653196	8.42072	7.7579	8.57259	8.55598	8.66496	7.33085	8.51138	8.51706	8.2903	8.9343	8.75118	8.03482	8.63026	8.71679	8.33807	8.11572	8.60456	8.26528	8.8383	9.0466	8.43034	8.69431	8.91353	8.56514	9.16358	8.84999	8.66641	8.11156	8.38754	8.10231	7.05293	8.42488	8.12972	7.84901	8.83666	9.21937	8.90244	8.95799	8.85451	9.01253	8.8571	8.96727	9.29394	9.26041	7.68087	7.92181
EFCAB12	0.703788	0.041499	0.0789125	8.57245	7.86866	8.26461	9.04013	9.63184	7.76835	9.26519	9.00624	7.91215	9.45952	9.05614	7.33204	9.03375	8.94625	8.93033	8.34542	9.03147	8.30358	9.31139	9.06298	8.62021	9.40264	9.45743	9.05707	9.39645	9.44641	9.0475	8.33304	8.32856	7.85578	4.7609	8.75446	9.09846	7.08063	8.99184	9.27851	9.16676	9.6558	8.85171	9.25969	9.60276	9.48088	9.51088	9.36927	7.42837	7.80787
EFCAB3	0.932202	2.24664e-07	2.13203e-06	5.13568	4.20347	4.95926	6.37228	5.44379	5.09291	4.94297	5.06803	5.25187	5.3421	5.47739	5.97555	5.95158	4.86874	4.9148	5.60887	5.24168	5.49221	5.3867	5.23924	5.31997	5.63503	5.01675	4.81144	5.19475	4.88296	5.39865	5.34244	5.08354	5.49832	4.58192	5.04207	4.51157	4.90648	4.44993	4.79274	5.04403	3.91101	4.33248	4.69752	5.18243	4.84426	4.8289	4.78173	5.42788	5.19304
EFCAB4A	1.27792	1.11398e-07	1.12729e-06	7.93817	6.66025	8.1356	8.26068	7.5804	8.36745	7.93864	7.47347	7.28709	7.96479	7.9294	7.58977	7.72842	7.88002	8.02917	7.37941	7.79647	7.23174	7.98916	8.49868	7.484	8.03867	8.43313	7.69107	8.1923	8.00315	7.64455	7.8446	7.77201	7.03329	6.40026	8.23761	8.36409	8.22917	7.93275	8.21084	8.44728	8.28349	8.7274	8.29766	8.41826	9.50623	8.63026	8.43754	8.36474	6.99813
EFHC2	0.691955	1.15601e-05	7.438e-05	7.25274	6.56078	7.23615	7.00982	7.40636	7.82779	6.92705	7.23615	6.76647	6.6796	7.38006	7.03041	7.28001	7.11595	7.78507	7.34048	7.13329	7.03896	7.40555	7.54434	7.22225	7.02066	7.45208	6.99205	7.21594	7.48979	7.13041	7.15258	7.29127	8.46055	7.21768	7.25667	7.28917	7.43308	7.70203	7.41695	7.16681	7.86992	7.75775	7.5143	7.42314	7.37586	8.01838	7.54138	6.40277	6.8067
EFR3B	0.958885	0.0027022	0.00842436	8.91692	7.95804	9.01509	8.95977	9.68599	8.30222	9.14564	9.22734	8.28712	9.38169	9.38772	8.24963	9.05614	9.28545	9.10563	8.25616	9.22099	8.5941	9.7326	9.75012	8.88389	9.24999	9.60067	9.29924	9.60373	9.66921	9.2207	8.27458	8.84285	7.99342	9.62365	9.01435	8.88857	8.05656	9.41932	9.85042	9.6295	10.2175	9.46568	9.73167	9.80779	10.088	10.2873	9.61441	7.71509	8.57326
EGF	0.594784	0.00234902	0.00749276	5.99731	5.40253	5.66365	6.10829	5.57404	5.21506	5.48218	5.99151	6.74566	5.67286	5.95589	6.07562	7.08099	6.19501	5.50478	6.012	6.15986	7.60978	6.5219	5.98683	6.37836	5.64632	6.4861	5.73991	5.50024	5.9956	6.28619	6.30801	5.91957	6.22688	6.03297	5.7826	6.03221	5.90836	5.65947	5.30735	5.11669	5.04102	5.89811	5.46256	6.09362	5.47392	5.82934	6.32672	5.04603	5.82665
EGFLAM-AS4	0.629127	0.00163186	0.00550123	5.5087	4.87957	5.64354	5.31006	5.61837	5.42864	5.20045	5.28791	5.43952	5.50803	5.96672	5.9738	5.46053	5.85571	5.41082	5.26726	5.76068	5.84866	5.84051	6.17601	5.41903	5.279	5.47236	5.52507	5.75075	5.33181	5.46547	5.00163	5.62093	5.16112	5.48254	5.63448	4.9365	5.84479	5.75614	5.94301	5.8457	6.41059	6.23352	6.26246	5.54421	6.02508	7.66088	6.45514	4.71207	4.97921
EGLN3	0.949242	0.000889813	0.00328052	9.116	8.16676	9.2557	9.29893	9.94754	7.96744	9.80536	9.50798	9.24173	9.56648	9.43684	8.35018	9.53437	9.57261	9.16098	8.80373	9.34002	8.93188	9.81638	9.91092	9.35545	9.77621	9.80821	9.56088	9.80679	9.70327	9.6558	9.06947	9.18899	8.8489	7.87277	9.36033	9.60239	8.85894	9.32001	9.51088	9.69028	9.93972	9.66164	9.23233	9.81825	9.76571	9.8317	10.0033	7.99877	8.45161
EHF	1.888	1.02901e-11	2.32416e-10	8.86049	6.97249	9.30665	9.7312	8.3507	10.0095	8.43454	8.80969	9.70159	8.73846	8.79223	10.0582	8.64276	9.38141	8.8003	8.15207	8.96788	8.99148	8.04299	8.86676	9.44556	8.69956	8.74166	8.33591	8.81492	7.92679	8.7191	9.18453	7.43374	9.73785	10.2372	9.59806	9.04785	9.5998	8.30794	8.39778	8.67614	8.11326	8.73083	8.54468	8.49024	9.34696	8.26824	8.21484	9.79082	7.57461
EHHADH	0.854668	0.00191103	0.00630852	8.43167	7.577	9.3404	8.58403	8.53064	8.93104	7.98385	8.84342	9.97644	8.58422	8.89402	9.9318	9.06636	9.00497	8.42626	9.18694	9.35861	9.07942	8.135	7.90674	9.63859	8.39322	8.58383	8.04618	7.55594	6.91838	8.55625	8.42265	7.92916	9.5499	8.87916	8.54811	7.45131	8.77053	8.42376	7.77264	7.40092	5.74941	7.95634	8.07811	7.83656	6.6224	7.70865	8.38168	9.11321	8.83125
EHMT2	0.774479	6.22661e-10	1.01111e-08	9.10709	8.33261	9.14392	8.95318	9.29024	9.12928	9.08864	9.05118	9.04834	9.04606	9.01006	9.19972	9.0922	9.21796	8.80969	9.06298	9.00775	9.53479	9.31254	9.29064	9.26695	9.0828	9.49023	9.62716	9.36694	9.31662	9.42414	8.82867	9.39883	8.98308	8.25957	9.13452	9.2439	9.01378	9.07784	9.37305	9.33271	9.21755	8.94141	8.77219	9.40825	9.507	9.22671	9.45136	8.34588	8.95063
EIF1B-AS1	0.794443	1.0852e-06	8.91862e-06	9.1768	8.38236	9.4355	9.16765	9.42196	9.05614	9.14792	9.29423	9.18378	9.33378	9.33643	9.53847	9.43088	9.5432	9.56006	9.23014	9.3404	9.30696	9.55567	9.41132	9.23375	9.30812	9.47859	9.44806	9.41502	9.38042	9.52131	9.13251	9.44174	9.3386	9.26299	9.18862	9.48687	9.3861	9.55186	9.60373	9.59423	9.45582	9.31693	9.49631	9.21937	9.28695	9.31662	9.66665	9.16704	8.61088
EIF4G1	1.23871	3.53145e-10	6.0524e-09	8.76564	7.52694	8.87159	8.8289	8.60927	9.15662	9.1694	8.67482	9.08121	8.57971	8.82657	9.39676	8.41179	8.13153	8.38329	8.81492	8.33525	9.07106	8.40602	8.5393	8.73555	8.56789	8.39839	8.70489	8.38034	8.41085	8.56862	8.88658	8.45093	9.37261	8.80005	8.30636	7.98699	9.03403	8.51411	8.22765	8.46995	7.29947	8.47658	8.73579	8.11591	8.45049	8.16882	8.54362	9.43601	9.33157
EIF6	0.804266	0.000193883	0.000884733	10.4343	9.63001	10.9883	10.076	9.78277	11.1456	10.3206	10.844	10.6541	10.6118	10.0993	11.1273	10.6089	10.8001	10.245	10.4539	10.2968	10.9821	9.97368	9.49992	10.5259	10.4993	9.2288	10.0787	10.5609	9.88983	10.3686	10.363	11.3047	11.4559	10.8489	10.4101	9.65531	10.8302	10.4654	9.07683	10.0342	8.99393	10.3574	9.77766	9.63416	9.8058	9.32681	9.61184	11.2324	11.1051
ELF3	2.36439	2.65276e-15	1.22123e-13	8.999	6.63461	9.35291	9.05614	8.135	8.46228	9.06364	9.03682	9.81133	8.38132	9.52601	8.68002	8.64348	9.23051	9.41771	9.28459	8.08699	9.06475	8.41907	8.68811	8.13603	9.94077	9.4734	8.92976	9.49055	7.19083	9.34621	9.39167	8.44073	9.1092	10.9299	9.83464	8.8696	9.08215	8.15395	8.35984	8.83329	7.59599	9.32037	8.81131	8.03123	9.5373	8.652	9.08967	9.5882	10.4344
ELL	1.1134	4.49605e-12	1.08594e-10	7.59423	6.48083	6.90922	7.59661	7.96608	6.43066	7.62834	7.71069	7.50226	7.61037	7.74275	7.18438	7.69843	7.90876	7.80728	7.73503	7.62176	7.75707	7.71333	7.30773	7.47265	8.01363	7.53	7.86348	7.94895	7.70788	7.82946	8.03204	7.90534	7.61484	7.08361	7.87443	8.05957	6.50334	7.77808	7.99793	7.86008	8.13959	7.80095	7.68984	8.00868	8.19632	7.53344	7.73751	7.35295	7.38665
ELL2	1.18449	4.59618e-06	3.2387e-05	9.59918	8.41469	9.4794	10.0452	10.1887	8.18291	9.97476	9.99129	9.44755	9.84825	10.2303	8.92645	9.76071	9.75528	9.83524	9.22368	9.83524	9.31525	10.17	10.1369	9.42295	9.94199	10.5502	9.91561	10.2303	10.1573	10.0081	9.33959	9.62013	8.9898	8.03736	9.67327	10.0152	7.87159	9.8332	10.3128	10.199	10.3653	10.0297	10.5232	10.1588	10.2975	10.6521	10.5978	8.77465	9.17737
ELL3	3.41055	1.461e-19	1.4791e-17	10.3807	6.9701	10.1822	10.9122	11.3193	9.50584	10.8375	10.6397	9.70417	10.889	11.1456	9.39084	10.8607	10.7694	10.596	9.75122	10.7955	10.0324	11.3635	11.0019	10.3191	11.1583	11.578	10.6141	11.2694	11.2844	10.7064	9.82702	10.1429	9.60239	9.84662	10.3285	10.4385	8.81764	10.8338	11.2128	11.0829	10.9584	10.7121	11.1566	11.1093	11.258	11.846	11.5032	9.1988	10.1102
ELMOD1	1.89584	1.65607e-05	0.000102822	8.45928	6.56344	8.41039	9.09195	9.70676	6.39478	9.44556	9.38204	8.80052	9.20305	9.45264	7.85703	9.06787	9.03204	9.01067	8.66332	9.12523	8.59471	9.66665	9.61184	8.75954	9.477	9.75872	8.77108	9.2648	9.20406	9.46105	8.5248	8.4995	8.34938	5.46231	9.09029	9.24213	6.20111	8.98255	9.55429	9.30846	9.65775	9.06566	9.87707	9.18378	9.46644	9.56207	9.89207	6.85919	7.54945
ELOVL2-AS1	1.1048	2.69309e-09	3.84871e-08	5.19138	4.08658	5.04403	4.95689	5.26253	5.24945	5.23608	5.35792	5.47326	4.94539	5.84722	5.26209	5.231	4.87331	5.53532	5.53011	5.05824	5.10573	5.48049	5.50478	5.50889	5.0957	5.23286	5.04967	5.16343	5.07425	5.28902	4.95449	5.38364	4.77923	5.54179	5.23962	5.35895	5.83791	6.05892	5.48017	5.81209	5.6651	5.60572	5.44212	5.32233	5.36129	5.4441	6.21676	4.07441	4.74695
ELOVL6	0.710901	0.00194989	0.00640537	7.91568	7.20478	8.94656	8.76799	7.77587	8.44517	7.5804	8.59066	7.46615	8.3118	8.45566	8.56885	7.97906	7.50572	7.45148	6.97506	6.63647	8.07644	8.0712	7.4986	7.31978	7.16385	7.00733	7.9451	7.64973	7.10524	7.62818	8.11917	8.22409	7.63693	8.26251	7.09295	7.40433	7.04144	8.29789	6.64364	7.11087	7.27396	8.21205	7.38554	7.71217	7.52868	7.79607	7.85284	8.12768	8.89788
ELP3	0.724452	0.00292153	0.00899612	9.95691	9.23246	10.3778	10.1653	10.6601	10.0688	10.524	10.0863	9.67379	10.349	10.2182	9.67062	10.1436	10.3371	10.1836	9.53263	10.1748	9.90551	10.4446	10.8607	10.2154	10.4852	10.4006	9.87707	10.4256	10.7742	10.3574	9.51594	9.77827	9.28586	8.57456	10.1142	10.0658	9.46884	10.2083	10.4828	10.5325	10.8038	10.6191	10.4539	10.6397	10.6799	10.8849	10.9071	9.05189	9.35121
EMC6	0.809916	0.000756324	0.00286644	10.2721	9.46219	10.5685	9.8396	9.47735	11.4095	10.2608	10.1369	11.2028	10.2739	9.97935	11.0598	10.2495	9.87126	10.1248	10.8669	10.1477	10.81	9.80732	10.2004	10.4211	9.93805	9.1464	9.83524	9.65075	9.58446	10.1822	11.3031	11.0816	11.1429	8.49462	10.1498	9.9146	10.8452	9.91037	9.23472	9.62544	9.69503	10.1753	9.4346	10.2959	9.44641	9.32037	9.12314	10.4697	10.8111
EME1	0.706872	0.000305564	0.001314	8.92027	8.2134	8.80608	9.1991	9.21014	8.87072	9.68833	8.95977	8.7649	9.51499	9.15804	8.47993	9.13382	9.11443	8.68335	8.98625	9.22775	8.83889	9.23307	9.23342	8.91151	9.31288	9.49741	9.22165	9.45217	9.3393	9.31254	9.02187	9.1809	8.65929	7.21883	9.02338	9.78021	8.4806	9.31254	8.85823	9.04267	9.05583	9.11157	9.07387	9.24999	9.3635	9.16136	9.10346	7.85865	8.51543
ENAM	0.671248	0.00208248	0.00677286	7.05574	6.3845	7.49917	7.29474	7.32036	7.40016	7.66282	7.14682	6.88793	7.42216	7.63884	6.84921	7.2299	7.60467	6.99562	6.71179	7.37846	6.81786	7.79884	7.80277	7.01021	7.47008	7.59161	7.37315	7.40126	7.39703	7.56047	6.97292	6.98316	6.45577	5.37918	6.99493	6.93701	7.07213	7.44454	7.95413	7.50751	7.79544	7.53308	7.50456	7.59264	7.73667	7.86426	7.81531	6.25416	6.30575
ENDOG	0.665501	0.00189766	0.00626982	7.59709	6.93159	7.78997	7.67419	7.72371	8.01601	8.1169	7.32187	7.49229	7.60392	7.14445	8.17377	7.49953	6.54142	7.54052	7.91874	6.92885	7.15697	6.87576	7.1023	7.13973	7.75808	7.62983	8.20805	7.2548	7.54776	7.02032	8.22917	7.43549	8.34999	8.56375	8.17654	7.07497	7.28709	7.3106	7.0543	6.71237	6.79765	7.71139	7.16851	6.70925	7.07697	6.69754	6.6614	7.82246	8.66197
ENPP3	0.747124	0.000995027	0.00361139	8.41204	7.66491	8.5676	8.58737	8.91092	8.3118	8.66176	8.96283	8.33349	8.78179	8.72714	8.02872	8.5913	8.62021	8.6836	8.29448	8.57744	8.34727	8.66147	8.94592	8.72415	8.73579	8.94397	8.40135	8.80608	8.82867	8.86194	8.47565	8.76044	8.5304	7.7022	8.69009	9.19278	8.40602	8.69195	8.77275	9.09966	8.77341	8.66197	8.71944	8.67734	8.9706	8.85823	8.70404	7.38351	7.82142
ENTPD1	1.00847	5.18555e-09	6.97914e-08	7.71985	6.71138	7.64488	7.8831	8.13248	7.44738	7.97377	8.18969	7.83574	7.86992	8.02956	7.36748	7.77078	7.78637	7.78204	7.91392	8.01601	7.67213	8.08586	7.94895	7.81073	8.0491	8.11729	7.74867	8.03394	7.91811	8.04133	7.79123	7.72584	7.48058	6.62695	8.2174	8.23413	7.57774	7.92391	8.17524	8.05857	8.13687	7.74984	8.33996	7.96055	8.04095	8.23101	8.06255	6.93268	7.10148
ENTPD6	1.0099	0.000376724	0.00157346	10.0761	9.06624	9.78429	10.1807	10.4385	9.53013	10.1981	10.0562	9.88879	10.2661	10.2921	9.27339	10.1956	10.1547	10.5921	10.081	10.0987	10.0912	10.2487	10.0836	10.0804	10.5548	10.8038	10.6049	10.655	10.5424	10.658	10.0241	10.2271	9.51906	9.17737	10.4716	10.8985	9.24864	10.6758	10.9868	10.711	11.3518	10.6418	10.724	10.9434	10.9568	10.873	10.9057	9.32642	9.99352
EP300-AS1	0.712346	0.00185711	0.00615273	8.14964	7.4373	8.43707	8.70335	6.7183	8.18493	8.37511	7.82012	8.21222	8.83125	7.97009	8.9386	8.12566	7.14593	8.66068	8.42534	7.5982	8.11876	7.66203	7.5127	7.7077	8.35984	7.32612	8.04955	8.56579	7.49533	8.33434	8.56862	8.87044	8.37731	9.3404	8.26805	8.0514	7.5663	7.73074	6.39402	7.80881	6.86304	8.08462	7.3044	8.14321	8.14525	8.15545	7.26822	8.37683	8.06208
EPB41L4B	0.807021	0.000135233	0.000647579	8.35385	7.54683	8.72415	8.41664	7.90454	8.83473	8.73215	8.40457	8.98038	8.2438	8.42244	9.16599	8.63846	8.20917	8.96098	9.20828	8.63026	8.81968	7.4834	8.15116	8.5864	8.24526	7.51916	8.1038	7.71833	7.97462	8.05957	8.79496	9.08699	8.97576	8.35563	8.53202	7.98428	8.91911	8.00685	7.79518	7.77166	7.24122	7.55449	7.39139	7.50168	7.26098	7.58112	7.05313	9.26964	8.44157
EPCAM	2.38538	7.80402e-18	5.72295e-16	12.1752	9.78982	12.6821	12.2265	11.7481	12.0514	12.8453	12.1077	13.0635	12.0027	12.3103	12.7861	12.5101	12.6055	12.4768	12.7308	12.4606	12.7614	11.8312	11.8344	12.9788	12.0682	11.5235	11.4341	11.6293	11.8895	12.1922	12.0824	12.2831	12.5022	12.5259	12.0634	12.1536	12.5758	12.0394	11.4211	11.6244	10.8428	11.9083	11.4751	11.5452	11.5032	11.3064	11.3175	12.3852	12.3103
EPHA1	0.592714	1.58525e-05	9.88565e-05	8.30005	7.70733	8.61597	8.42534	8.43034	8.73817	8.35206	8.22409	8.32311	8.75199	8.44494	8.00359	8.50108	8.31819	8.58687	8.35941	8.46783	8.31437	8.12736	8.63212	8.78736	8.51264	8.11239	7.90157	8.30636	8.5779	8.47464	8.47707	8.53902	8.19614	8.61617	8.31776	8.51615	8.60538	8.39861	8.29448	8.30438	8.58783	8.91408	8.43034	8.34655	8.52263	8.24318	7.91751	7.67132	8.19557
EPHA10	0.610946	0.00325902	0.00985677	6.85439	6.24344	6.04925	6.86392	7.3131	5.99353	7.32413	7.2081	6.69933	7.15067	7.14824	6.24429	6.73714	7.01953	6.62024	6.72462	6.80269	6.05327	7.31704	7.04663	6.35982	7.50833	7.4109	7.66555	7.89721	7.1579	6.85724	7.0541	7.14646	7.53162	6.85781	7.8322	7.62894	6.10089	7.2203	7.62543	7.0367	7.54929	7.02393	7.16063	7.43027	6.9837	7.27558	7.42649	5.88356	6.34879
EPHB3	0.738404	0.012116	0.0293006	9.79776	9.05936	9.20475	9.99129	10.4483	8.40602	10.1768	10.1174	9.5424	9.9753	10.2223	9.42258	10.0773	10.1542	10.2358	9.82973	10.083	10.0191	10.5403	9.93908	9.78429	10.3455	10.7209	10.4817	10.5555	10.4057	10.2928	9.74391	9.98257	9.44676	9.10952	10.1741	10.4309	8.24805	10.1471	10.697	10.3976	10.6907	10.164	10.5749	10.3747	10.5502	10.643	10.7821	8.35878	9.32755
EPHX4	2.81022	7.22401e-11	1.41825e-09	7.17992	4.3697	6.7753	7.23791	6.72322	7.51551	8.63846	8.66413	6.43209	6.75035	5.95672	7.35844	6.9889	9.08312	5.90532	7.92226	6.04165	7.12117	6.88848	7.78081	7.7489	6.99311	7.33575	6.62293	6.22497	5.10325	7.03692	9.40409	5.73394	7.90475	8.24885	6.81249	5.90744	5.24803	8.21442	5.66479	4.94539	7.10036	8.59696	7.26597	7.64522	6.0014	5.60655	6.50799	6.08167	8.21619
EPOR	0.595154	0.00359347	0.0107014	9.01784	8.42269	8.90591	9.04834	9.45416	8.99067	9.13086	9.23659	8.97355	9.20906	9.37996	8.67117	9.23785	9.20104	9.3635	9.12767	9.29605	9.09906	9.38141	9.51861	8.99428	9.26661	9.5432	9.30989	9.44313	9.34545	9.31624	9.09284	9.13286	8.92374	8.54909	9.4095	9.38999	8.82159	9.30219	9.84609	9.50924	9.8188	9.27116	9.43384	9.43171	9.36002	9.52042	9.63137	8.1626	8.22765
EPT1	0.730651	0.00066148	0.00254664	8.24197	7.51132	9.42769	8.27159	7.89865	8.51636	8.50897	7.9005	7.91554	8.29074	8.241	9.35673	8.28057	8.3775	7.72007	8.32518	7.80296	8.98875	8.39024	7.82496	8.6528	7.91012	7.19083	6.95346	7.48271	7.61985	8.26402	8.31605	8.24526	8.67407	8.92315	8.21957	7.78887	7.95454	7.94382	8.05153	7.45544	7.21905	7.89675	7.62834	7.55471	7.85973	7.16534	7.9801	8.49144	8.70712
EPYC	1.50497	5.60838e-05	0.000301432	6.26341	4.75844	5.52084	5.71374	5.48472	5.70737	6.2771	7.75877	8.37932	5.73751	6.02752	6.61283	5.50326	5.7035	5.34142	5.35176	6.00722	5.38995	5.98561	8.57025	5.34703	5.03417	6.22363	6.77583	5.50738	5.69977	6.30331	5.36785	5.59932	5.86694	5.5244	5.514	5.21128	6.08687	6.01405	6.13116	6.35167	7.91324	7.55952	10.2168	5.94718	6.60855	7.97597	7.53162	5.37589	6.17644
ERAL1	1.03997	0.0128736	0.0307396	9.84195	8.80198	9.60328	10.0886	11.0045	8.62584	10.1309	10.4057	9.18199	10.2796	10.8264	8.54598	10.359	10.5502	10.4028	9.65167	10.4176	9.8521	10.9282	10.4416	10.0421	10.6182	10.991	10.206	11.086	10.8289	10.5655	9.62672	9.92408	9.30696	6.29189	10.4211	10.3098	8.11012	10.5477	10.9408	10.5359	11.2028	10.3598	10.9474	10.991	10.9358	11.2658	10.8838	8.31462	9.25385
ERBB2	1.19848	1.21666e-10	2.28173e-09	8.58616	7.38769	8.19144	8.80863	8.73846	7.60741	9.07165	8.95292	8.77908	8.57099	8.43707	8.51341	8.43356	8.46138	9.02492	9.11596	8.67927	8.72937	8.45372	8.48927	8.80346	8.87239	9.02618	8.85972	8.80783	9.12482	9.05454	8.934	9.04996	9.0828	8.0396	9.2248	9.19304	7.50103	8.68669	8.85999	8.82574	8.91941	8.85396	8.43356	8.33366	8.35941	8.21484	8.95229	8.30545	8.6404
ERC2-IT1	0.625127	0.00527358	0.0147596	5.65981	5.03469	5.20982	6.63196	5.76945	5.0573	5.08101	6.03756	5.58922	6.52233	5.56713	6.81545	6.42696	5.56398	4.83932	5.65814	4.98303	6.12394	6.9977	5.47299	5.25187	5.51243	5.53425	5.59216	5.80253	6.37254	6.3227	4.96634	6.12069	5.90974	8.38531	5.15851	5.24002	5.21587	6.29846	5.12395	5.69349	5.00788	5.56235	5.72072	5.32382	5.43785	6.40849	5.95654	5.23178	5.23133
ERCC6L	0.900052	0.0105853	0.0262253	8.14086	7.24081	7.46251	8.52362	8.8233	7.19066	8.5779	8.76821	7.73197	8.20409	8.71357	7.60781	8.8849	9.07452	8.50316	8.52841	8.54082	8.20207	8.90218	8.28832	8.09873	8.92823	9.38141	9.22438	9.35784	8.70864	8.91884	8.35791	8.86422	7.75754	5.63774	8.9398	8.813	6.81193	8.26272	8.92532	8.37582	8.88658	7.87317	8.73504	8.56907	8.50741	8.8896	8.9015	6.85403	6.98813
ERI2	0.706638	0.0027919	0.00865916	8.78475	8.07811	8.51824	9.18694	9.2921	7.46788	9.32755	9.43684	8.73846	8.95603	9.45175	8.36236	8.92565	9.04204	9.0259	8.93252	8.87977	8.58832	9.38892	9.3497	8.87615	9.28393	9.52743	8.73263	9.23884	9.2439	9.24632	8.82777	8.9569	8.50966	8.33147	9.0864	9.12155	7.45246	9.16294	9.36649	9.2248	9.76205	8.96758	9.17584	9.24697	9.31773	9.4346	9.7747	7.78099	7.8831
ERICH1-AS1	0.72618	0.0063582	0.0172487	8.10293	7.37675	7.54797	8.4111	8.83525	6.81415	8.42583	8.57237	8.10616	8.56178	8.22592	7.57813	8.47509	8.431	8.55768	8.28869	8.33485	8.18243	8.44934	8.40862	8.3683	8.62899	8.44279	8.46138	8.89019	8.78179	8.50603	8.34956	8.47968	8.01076	6.78601	8.55669	8.76348	6.88863	8.4273	8.68811	8.48231	9.55667	8.37954	8.71801	8.60352	8.77807	8.64174	8.61301	7.01899	6.91187
ERV3-2	1.33878	9.41224e-05	0.000472574	9.93378	8.59499	10.0378	10.1535	11.0228	9.97763	10.4274	10.3564	9.74291	10.5528	10.886	9.86119	10.0519	10.3448	10.1324	9.74534	10.2343	9.7489	10.6356	10.9766	9.89471	10.7415	10.8001	10.1262	10.6221	10.6724	10.5565	9.92635	10.1355	9.47011	9.41932	10.444	10.4474	10.2195	10.2772	10.4309	10.4446	10.4176	10.2106	10.5267	10.0982	10.4741	10.8962	10.8554	8.42965	9.1092
ERVFH21-1	1.28769	0.000942109	0.00344502	9.10135	7.81366	9.59465	9.37696	10.4057	9.18018	9.83361	9.64215	9.11381	9.84714	9.66206	8.92497	9.57106	9.58045	9.38578	8.77724	9.90323	8.90676	10.1027	9.98309	8.9322	9.48036	9.70375	9.7937	9.93908	9.81184	9.42295	8.77391	9.33452	8.8523	4.81341	9.49631	9.49312	9.90551	9.72639	10.1505	9.89266	10.1852	9.91901	9.92343	9.97203	9.98779	10.2748	9.60953	7.36586	8.02274
ERVH-1	1.08474	0.00307325	0.00937297	12.1617	11.0769	12.1077	12.4213	12.7744	11.4864	12.5534	12.4275	12.0874	12.5758	12.8193	11.5154	12.6724	12.6135	12.3169	11.9703	12.7008	12.1286	13.2603	12.7512	12.3312	12.7614	13.4103	12.7008	13.1572	12.8453	12.7308	11.9993	12.0929	11.6529	11.3413	12.7861	12.7403	11.1152	12.5377	12.8991	12.6923	13.0986	12.6336	12.9374	12.8193	12.9501	13.0261	12.9788	10.8134	12.0394
ERVH-3	0.821184	3.71189e-08	4.15093e-07	6.66823	5.84704	6.32517	6.58209	6.19755	6.19522	8.62021	6.13695	6.77719	7.03174	6.32941	6.69874	6.53627	6.306	6.53472	6.34297	6.4528	6.42899	5.97029	6.2205	6.56309	6.41914	6.44257	6.97906	6.43607	6.69399	6.48522	6.91569	6.64512	6.891	6.59653	6.80811	7.36521	6.87126	6.86165	6.62829	6.47325	6.63559	6.59955	6.45981	6.67105	6.93016	6.31964	6.95294	6.8499	6.79113
ERVH-4	1.00897	0.0113467	0.027775	9.43887	8.42991	9.27821	9.77042	10.3098	9.09738	9.79278	9.86178	9.04996	9.88313	10.1844	8.59935	9.99241	9.97476	9.93237	9.2801	9.89532	9.21937	10.4139	10.2685	9.42911	10.081	10.6258	10.2393	10.3285	10.2487	10.0773	9.54273	9.68091	9.05707	8.97355	9.98673	10.5518	9.4157	10.0119	10.6991	10.3476	10.5079	9.69919	10.1186	10.3548	10.1518	10.4716	10.7156	7.56333	7.86508
ESAM	0.867244	0.0306067	0.0619718	7.50177	6.63453	6.7422	8.00022	8.80052	6.06765	7.64107	8.48927	7.32722	7.53732	8.32221	5.97816	8.42265	8.60485	7.99552	7.58824	8.33281	6.89019	8.69503	8.2459	7.73603	8.47068	8.6422	8.08869	8.78692	8.28138	8.32662	7.78429	7.91854	7.25628	6.59265	8.35424	8.29271	5.65969	7.59679	8.51894	7.96411	8.97498	7.16437	8.22221	8.2202	7.24808	8.54384	8.69112	6.10577	5.56652
ESCO2	1.85408	6.1711e-16	3.18006e-14	7.26613	5.41205	7.54832	7.78507	7.5234	6.3351	8.1091	7.56291	7.47831	7.94304	7.62406	7.49686	7.44543	7.46574	7.17891	7.52321	7.50405	7.78528	7.76767	7.61664	7.58922	7.70511	7.64616	7.50386	7.53732	7.50634	7.51057	7.13273	7.17441	7.018	6.45452	7.46919	7.63216	6.64089	7.44562	7.07401	7.33694	6.97024	7.50535	7.60842	7.42893	7.51192	7.83007	7.69658	6.63008	6.57036
ESM1	3.75802	5.93683e-15	2.52481e-13	7.35745	3.59943	7.78429	6.24277	7.81283	7.84056	7.13897	7.51975	9.23914	7.68963	5.67976	8.56975	6.21778	5.00732	4.94657	8.5248	8.83329	8.22937	5.53138	7.39475	8.60138	8.7001	6.75939	5.80489	6.73737	7.88137	8.386	6.98334	5.84355	5.86311	7.28513	5.01613	8.91941	7.72967	8.32542	8.87517	5.84743	6.48502	8.93286	6.96953	7.06824	6.22849	7.89568	7.78081	8.14841	6.40434
ESPL1	0.850955	1.43323e-05	9.00396e-05	9.74682	8.89587	9.76713	9.84558	9.89266	9.77926	9.88879	9.61688	9.7312	9.9207	10.2717	9.75432	10.0952	9.76889	9.46035	9.5701	9.73889	9.71052	10.0008	10.3135	9.58102	9.79725	10.5079	10.3008	9.92785	9.78582	10.1968	9.70979	10.0593	9.44716	8.53442	10.1068	10.3498	9.70159	9.98943	10.377	10.1198	9.98309	9.48732	10.2203	10.0081	9.88473	10.2133	10.9568	8.99428	9.40591
ESRG	1.26719	0.00082273	0.00306931	7.69727	6.43009	7.0987	7.92249	8.23413	6.90147	8.45965	8.40602	7.41253	7.85746	8.35222	7.3772	7.89485	8.10501	8.07666	7.24042	7.92365	7.13213	8.58757	8.36855	7.26115	8.11672	8.44964	8.38442	8.36054	8.22544	7.99164	7.55825	7.59374	7.75894	8.59017	7.85059	8.24885	7.0543	8.21006	8.73555	8.72081	9.05824	8.55203	8.29474	8.78566	8.6778	9.04516	8.81442	6.73069	7.10251
ESRP1	1.82944	2.43325e-18	1.98124e-16	10.1258	8.29637	9.98779	10.3661	9.54437	10.1062	9.71148	10.1417	10.7297	10.62	10.3347	10.2217	9.17737	10.1417	9.73355	10.5999	10.0635	10.2888	10.1581	10.0588	10.4707	9.62672	9.98838	9.92287	9.46035	9.92287	10.3331	10.1628	9.45829	10.7131	10.62	10.452	9.93471	10.5932	9.72119	9.83361	9.47613	9.48505	10.0124	9.84825	9.99517	10.1047	9.97935	9.77873	10.1607	10.1559
ESRP2	0.639295	5.19362e-05	0.000281721	8.39671	7.75742	8.10324	8.28295	8.12862	8.3507	9.02099	7.89743	8.04559	8.24274	8.50741	8.06358	8.57052	8.79198	7.94849	8.35248	7.65385	8.35048	8.07365	8.53298	8.84142	8.14525	8.27544	8.53951	8.14897	8.12736	8.66474	8.02956	7.82227	8.49071	8.57479	8.29747	8.21442	8.47287	8.38531	8.50843	8.53011	7.71592	8.23809	8.13345	7.9559	8.9484	8.22765	8.44005	8.53064	8.64847
ESRRA	0.807441	7.4356e-05	0.000387267	9.33761	8.53017	9.29643	9.63416	9.81638	8.85592	9.62716	9.50407	9.35861	9.62544	9.82464	9.04867	9.41538	9.4555	9.3747	9.13646	9.56969	8.98676	9.64365	9.96958	9.30219	9.73454	9.98562	9.3747	9.5998	9.76113	9.58909	9.23201	9.20906	9.19042	9.13756	9.69872	9.79324	8.50269	9.49541	10.1349	9.85686	9.89584	9.55021	9.69028	9.41812	9.56594	9.79033	10.2865	9.42295	9.06507
ETV4	0.681186	0.00635583	0.0172464	8.05537	7.37419	7.74258	8.15505	8.17416	7.38455	7.73912	8.10981	7.30359	8.2825	7.96352	7.14761	7.43249	8.29928	8.68933	8.30507	7.67773	8.39227	8.41135	7.99083	8.12907	8.18542	8.37483	8.03902	8.2705	8.33906	7.99367	7.59142	7.82609	7.40126	6.4209	7.81531	8.14424	6.81641	8.29992	8.39556	8.1014	9.76624	8.06339	8.30817	9.45416	9.3348	8.65118	8.31068	7.12133	8.56537
ETV6	0.849568	4.57424e-07	4.08823e-06	9.05538	8.20581	9.20534	9.04996	9.24999	8.66474	8.90091	8.99007	9.03527	8.95461	9.63859	8.67435	8.94465	9.14914	9.18231	8.78593	9.14218	8.92497	8.95063	9.72537	8.88985	8.9898	9.41812	9.82243	9.08082	9.06298	9.14148	8.95229	8.84816	8.81993	8.96535	9.52813	9.00525	8.6404	9.19248	9.4753	9.45987	9.96305	9.14942	9.29716	9.4992	9.63859	9.67236	9.59212	8.78541	9.07417
EVA1A	0.882511	0.0010035	0.00363579	8.29379	7.41128	7.94118	8.47402	9.09029	7.85823	8.43868	8.39969	7.83613	8.48899	8.74948	7.14289	8.44568	8.40793	8.90091	8.3191	8.28586	8.23476	9.04834	8.64517	7.93459	8.43707	9.05551	8.99365	8.7887	8.61181	8.65488	8.42074	8.60516	8.17354	7.86897	8.66641	8.9338	8.27184	8.74555	9.12125	8.96535	9.19448	8.41135	8.80266	8.84976	8.34092	9.2588	9.49992	7.40317	7.10129
EVPLL	0.930556	4.76051e-05	0.000260825	8.22191	7.29135	7.65517	8.14985	8.32426	8.06925	8.40532	8.53727	8.43774	8.52925	8.42074	7.96314	7.90349	8.00548	8.43034	8.37819	7.87959	8.18898	8.71515	8.11517	8.0437	7.99651	8.4185	8.45372	8.36635	8.34221	8.91435	9.58387	8.1653	8.2795	7.72007	8.84665	9.62716	7.60392	8.85287	8.88442	8.50673	9.59806	7.55254	8.59962	8.45585	7.85369	8.61667	8.48598	7.93904	7.7135
EXD1	0.691782	0.000384613	0.00160174	5.0371	4.34532	5.59816	5.4912	5.93542	5.57064	5.38268	5.42035	4.70673	5.26466	5.5363	4.83095	5.03216	5.63263	5.11669	5.02114	5.17043	5.07474	5.82352	5.80084	5.24578	5.50977	5.48186	4.58025	5.04156	5.14812	4.99765	4.74403	5.35826	4.87274	5.62733	4.86221	4.50224	5.10416	4.89161	4.94713	4.90843	5.24578	5.51278	4.96807	5.17275	5.18687	6.01293	5.67204	4.34588	4.21058
EXOC3L4	0.973982	3.60188e-08	4.04289e-07	6.78332	5.80933	6.57745	6.9917	7.32837	5.9493	6.88774	7.07328	6.40411	6.98913	6.7183	6.45098	6.9214	6.74494	6.88483	6.65465	6.90424	6.58806	7.13293	7.02531	6.41595	7.10772	7.34102	6.97213	7.25667	7.14664	6.89879	6.70806	6.86304	7.57595	4.83583	7.05975	8.00091	5.98186	6.66315	7.1759	6.9106	7.46919	6.64512	7.06068	6.97627	6.81155	7.22188	6.57441	6.60874	6.39363
EYA2	2.94817	2.31317e-10	4.10109e-09	10.0519	7.10378	11.1345	10.8644	9.28046	10.5781	9.2975	10.714	10.4368	7.77449	9.33827	11.249	10.5801	12.0874	9.97149	11.5179	8.60084	9.44556	10.0658	10.1581	11.7116	9.56006	9.2086	10.9737	10.7885	6.73757	10.3926	10.9808	7.78962	11.387	11.846	7.7155	9.14816	11.3413	10.8594	9.02187	10.3379	8.26423	11.0285	10.0075	10.9512	10.0409	9.23985	9.1719	8.66886	11.1616
EYA4	1.09964	0.00124298	0.00436521	8.33687	7.23723	8.22038	8.79606	9.03779	7.68483	8.95799	8.78767	8.49006	8.67237	9.14723	8.21265	9.0906	8.78827	8.65361	8.3245	8.68561	8.73975	9.06726	8.93767	8.58468	8.58189	9.19747	8.40068	8.95799	8.71597	8.79761	7.98916	8.70837	8.00384	5.92098	8.55281	8.47993	6.95366	8.83501	9.40095	9.21937	9.33787	8.59988	8.68216	8.80184	8.7552	9.64	9.65122	7.76957	7.61325
EZH2	1.41266	1.46937e-09	2.20658e-08	8.45605	7.04339	7.98678	8.08105	8.17054	7.9942	9.24324	7.68388	9.15907	9.22009	9.65927	8.9456	9.03316	7.98999	7.93671	8.57864	7.98836	9.13315	9.20669	7.86591	8.03886	8.53371	7.77706	8.36657	7.69884	8.32378	8.27281	8.32154	9.62544	7.84322	8.86937	7.85746	8.22057	8.40357	7.68735	6.89596	7.51448	7.7449	8.63721	8.20032	8.38012	9.22942	8.62365	8.2605	7.91369	9.14218
F12	0.866289	0.000767996	0.00290202	8.3305	7.46421	8.19016	8.57839	8.90357	7.96461	8.5304	8.26919	8.06784	8.86314	8.77391	7.64129	8.58232	8.54666	8.53326	7.8221	8.49563	8.05777	8.47442	8.87583	8.25765	8.74166	8.562	8.38754	8.53011	8.55405	8.46446	8.50966	8.42583	8.25168	10.4539	8.46714	8.59811	7.65267	8.76769	8.68109	8.68886	8.92674	8.43034	9.03527	8.64094	8.7939	8.82411	9.16562	7.71649	8.77415
FAAH2	0.869886	0.000264167	0.00115921	8.56021	7.69033	9.10952	7.44673	7.03555	9.94579	8.73716	8.96469	9.03654	7.72882	9.09326	9.03262	9.1958	8.72664	8.99276	8.82657	8.41592	8.71882	8.75787	9.08246	9.31489	9.25295	8.65167	8.6469	8.30263	7.92498	7.42878	8.29136	7.42799	9.46613	8.81884	7.80845	7.88102	9.60151	8.86165	8.50673	7.3294	8.01934	9.34334	8.77831	8.74782	7.57326	7.09602	8.18839	9.20198	8.65984
FABP3P2	0.719979	0.0090278	0.0230223	6.8984	6.17842	7.53384	7.12057	7.53145	7.5956	7.08985	7.01817	6.22833	7.56274	7.7278	6.44862	7.1	7.51251	6.85286	6.4331	7.06563	6.41934	8.0333	7.70316	6.93799	6.86032	7.69002	6.94332	8.55998	7.47741	7.07193	6.52955	6.68145	6.60301	7.02911	6.86483	6.55976	7.43143	7.23174	7.24273	7.5213	7.87159	7.52482	6.82719	7.10148	7.65669	8.10193	7.64762	5.62106	6.0253
FABP6	0.728286	0.00453783	0.0130075	6.98943	6.26115	6.89264	6.39699	6.25256	6.89118	6.34474	6.57962	7.07859	7.82719	6.3706	8.67635	6.61591	6.51653	7.39083	6.98516	8.7939	6.98391	7.73912	6.3351	6.71764	6.3332	7.44488	6.55427	6.75457	6.37208	6.64899	6.58635	8.61667	8.54715	5.20285	7.92457	6.75668	7.20746	7.67276	6.452	7.37405	6.30331	6.44573	6.77668	6.43209	6.38951	6.57927	6.17192	7.85973	7.52744
FAF1	0.717077	2.21107e-05	0.000133235	9.02447	8.30739	8.88575	9.22632	9.44676	8.58468	9.28317	9.20162	8.81074	9.34932	9.2975	8.64977	9.03147	9.00746	9.19042	9.04576	9.03116	8.79734	9.11381	9.39512	9.02525	9.16324	9.35253	9.47613	9.16532	9.32071	9.31803	9.29469	9.37261	9.02243	8.69056	9.27667	9.65075	8.55925	9.25333	9.40409	9.57152	9.63278	9.32152	9.40825	9.16203	9.34771	9.50455	9.4157	8.48828	8.67898
FAIM3	1.06067	0.000191885	0.000876665	9.70872	8.64805	9.15497	9.88879	10.2083	8.62605	10.1174	9.92892	9.46208	9.97986	10.1466	9.00109	9.95297	9.90379	9.98562	9.72916	9.84558	9.71761	10.1309	10.0107	9.62505	10.3051	10.4774	10.4211	10.3484	10.4317	10.2459	9.89266	10.1235	9.58304	7.07842	10.2238	10.7495	8.38458	10.2708	10.6713	10.6655	10.6231	9.90028	10.513	10.4626	10.3307	10.524	10.6418	8.73263	9.41611
FAM107A	1.003	0.00538097	0.0150087	8.64828	7.64529	8.69556	10.835	8.78659	11.0056	7.11703	8.59236	7.98916	7.71873	9.90551	7.35219	9.88473	9.82124	9.63947	8.02005	7.30551	8.67658	7.56474	7.55082	8.68159	8.00246	9.43249	8.04502	8.37655	9.96888	9.22632	7.50891	7.27849	8.51733	10.0969	8.12178	7.96334	10.8231	7.54569	8.58737	7.95353	8.0126	8.9343	9.43171	7.90492	9.55429	7.82087	8.94107	8.98409	7.52356
FAM109B	1.95425	2.76375e-06	2.05909e-05	10.1232	8.16898	9.63184	10.7002	11.2081	7.64636	10.7649	11.0389	10.0869	10.7716	10.7556	9.38311	10.7821	10.6799	10.886	10.3293	10.6895	10.3455	11.046	10.596	10.3644	11.1213	11.2304	10.7556	11.1478	11.123	11.0816	10.6682	10.363	9.87341	8.07811	11.2618	11.478	8.14795	10.6221	11.0113	10.732	11.6862	10.835	11.2525	11.2541	11.2343	10.9474	10.6961	8.18291	9.33307
FAM111B	0.693373	2.21097e-07	2.09991e-06	5.78013	5.08676	5.71291	5.66085	5.40692	5.19304	6.36972	5.62	6.43822	5.76171	5.59422	5.74585	5.59738	5.8239	5.69349	5.86012	5.81304	5.88738	5.65731	5.39678	6.57962	5.75795	5.48829	5.3242	5.88356	5.67061	5.62227	6.00472	5.74709	5.7025	6.58337	5.99414	6.07562	5.38397	5.63344	5.42068	5.51858	5.47236	5.72916	5.2502	5.51339	5.49958	5.29239	5.37022	5.67833	5.71398
FAM117B	0.791274	4.04484e-05	0.000225942	8.3833	7.59202	8.29074	8.3363	7.8812	8.79496	8.44327	8.61964	8.40407	7.66364	7.92835	9.05159	8.386	8.71708	8.35315	8.9865	8.30011	9.0922	7.68163	7.88601	9.21937	8.0967	7.77129	7.71811	7.60158	7.89985	8.17034	8.32791	8.80077	8.35137	8.14525	8.61493	7.52067	8.84841	8.57304	7.75835	8.47728	7.4492	7.36922	7.82691	8.35493	8.2383	8.14567	7.86853	9.01696	9.2248
FAM132B	0.715496	0.0301381	0.0611908	9.57692	8.86142	9.12963	9.99969	10.2364	8.98769	9.99919	9.9249	9.42295	9.93294	10.115	8.69481	9.89637	9.94579	9.88473	9.43864	9.78472	9.43427	10.3353	10.2921	9.48277	10.1535	10.5702	10.3778	10.2217	10.1559	10.0749	9.8357	9.76937	9.34545	6.34297	10.3117	10.4344	9.35582	10.1667	10.6009	10.2667	10.2772	9.69636	10.2856	10.316	10.1021	10.4607	10.81	8.25121	9.07481
FAM135B	0.994472	0.00599531	0.0164279	8.07062	7.07615	7.97724	8.36054	8.97881	6.67836	8.66147	8.60166	8.32591	8.44779	8.59988	7.4795	8.68216	8.63308	8.69585	8.58512	8.65435	8.48977	8.57744	8.58189	8.37483	8.65598	8.7693	8.75225	8.96098	8.5635	8.77855	8.96535	8.70379	8.28116	7.30939	9.26299	8.97444	6.96905	8.65118	9.15945	8.52882	9.12903	8.32116	8.68087	8.44934	8.46253	8.54434	8.48347	6.46003	6.95213
FAM136A	0.684943	3.574e-08	4.01833e-07	9.727	9.04206	10.1223	9.93294	9.5998	10.3961	9.39512	9.87025	10.0002	9.82464	10.0635	9.88755	9.52131	9.76261	9.73785	9.80091	9.53847	10.2286	10.1169	9.70197	9.25675	9.85972	9.54273	9.85626	9.76889	9.76205	9.63236	9.95632	10.2825	10.1774	10.3622	9.51906	9.47454	10.1915	9.44436	9.42453	9.61772	9.57752	9.91092	9.26695	9.30733	9.84609	9.68033	9.70254	9.22671	9.48088
FAM155B	0.851285	1.47012e-05	9.21545e-05	7.96842	7.11714	8.10118	7.9294	8.44267	8.48852	7.91345	7.78867	7.53061	8.08739	8.48106	7.7022	8.27858	8.07875	7.862	7.48232	8.02005	7.91414	8.74505	8.59385	7.76835	7.72741	8.36518	7.81726	8.65859	8.21442	7.89444	7.28979	7.81306	7.23295	6.88656	7.52884	7.46898	8.3363	8.07164	8.56815	8.27906	8.89402	8.39072	8.32872	8.66641	8.44779	9.23622	8.5523	8.15762	7.53573
FAM166A	0.662214	0.00474907	0.0135164	7.88922	7.22701	7.98245	8.15762	8.5029	7.51014	7.93842	8.21419	7.52868	7.93823	8.36103	7.26904	7.902	8.06965	8.08481	7.80471	8.06542	7.45317	8.74383	8.71572	7.65457	8.1923	8.91994	8.43797	9.03743	8.49006	8.5572	7.37903	7.74258	7.32966	7.08528	8.72415	8.34092	7.77431	7.75583	8.64517	8.4423	8.77465	7.85889	8.40764	8.32791	8.31582	8.67141	8.51572	7.11322	6.99149
FAM167B	0.809425	0.00297118	0.00911269	7.70945	6.90002	7.56939	7.96744	8.11012	7.58578	7.73811	7.84056	7.36131	7.46942	8.08416	7.2783	8.0382	7.87317	8.24076	7.96811	7.68265	7.64288	8.5335	8.06399	7.78429	7.37676	8.54537	8.60112	7.93233	7.48197	8.01441	7.80944	7.67474	7.69906	7.85634	8.22344	8.64094	8.4871	8.67407	8.89443	8.49144	8.31776	8.30839	8.49394	7.91369	8.31888	8.31207	8.6575	6.24543	6.53002
FAM170B-AS1	0.987079	0.0266625	0.055392	10.4485	9.4614	10.0952	10.7405	11.2844	9.09881	10.7793	10.9046	10.204	10.8219	11.1598	9.67284	10.9706	10.9793	10.9629	10.2106	10.8787	10.5149	11.4611	11.0816	10.4828	11.1444	11.5512	11.1377	11.4801	11.3081	11.1195	10.324	10.3653	9.83123	5.24904	11.0683	10.9358	8.91294	11.2505	11.6555	11.4426	11.769	10.9311	11.5428	11.5731	11.557	11.6267	11.7087	9.43171	9.95814
FAM171A1	1.41696	3.38026e-08	3.81927e-07	9.66057	8.24361	10.0403	9.86381	9.95338	8.54566	8.57722	9.49588	8.88513	8.67261	9.41893	10.3677	10.1477	10.1607	9.42124	9.97587	8.98165	10.2685	9.38578	8.90676	9.88585	9.65122	9.34545	9.4992	9.68033	9.59513	9.42832	8.76747	9.71356	9.27077	10.1498	8.4503	7.92798	9.92947	9.62764	9.5882	9.60546	8.10848	9.76852	10.0768	10.0537	9.89758	10.0519	9.89695	10.1653	10.3557
FAM174B	0.769374	2.12627e-06	1.63088e-05	9.27311	8.50374	9.72164	9.1154	9.37116	8.88309	9.16234	9.36311	9.12063	9.06201	9.39284	8.92823	8.9976	9.56053	9.44938	9.75432	9.27917	9.15266	9.79563	9.67773	9.71713	9.38351	9.48277	9.37838	9.50237	9.42005	9.08799	9.27743	9.49468	9.26785	8.09078	10.0554	9.36393	8.94592	9.61772	9.66031	9.6111	9.58545	9.2557	9.44053	9.45504	10.1241	9.60953	8.9152	8.66282	9.2207
FAM178B	1.366	2.43462e-06	1.84162e-05	8.07654	6.71054	8.43478	8.08907	8.33434	7.99651	8.1488	8.26461	7.51776	8.37655	8.57408	7.72007	8.3245	8.27258	8.49523	7.73197	8.18898	7.73811	8.69529	8.64871	8.07644	8.46307	8.58422	8.46162	8.78307	8.68729	8.47402	7.62176	7.95634	7.01075	5.60436	8.2889	8.33045	7.60804	8.87887	9.04267	9.03527	9.79882	9.02741	8.63334	9.36768	9.50584	8.98676	8.6677	7.12826	7.66555
FAM181A	1.34228	1.24188e-05	7.92806e-05	6.87575	5.53347	7.80899	5.93021	7.06584	7.14354	6.47144	6.92666	5.66324	6.50889	6.77687	7.64636	7.64023	6.09151	6.53255	5.99353	5.8389	6.69164	6.58864	6.29146	7.09892	7.57618	5.49205	7.56647	8.25047	7.62718	6.14865	6.42817	7.57407	5.83641	8.24318	6.49975	5.8239	5.58146	6.56085	5.86382	6.81359	6.1499	6.34383	6.35582	7.42685	6.17302	5.8931	6.05689	7.30341	8.22038
FAM181A-AS1	1.12492	0.000717682	0.00273585	6.37925	5.25433	5.75075	6.5207	7.81553	5.30534	6.985	7.19669	5.22973	7.5133	7.22746	5.34394	5.83562	6.35746	6.69107	6.24054	6.89668	6.1929	7.39917	6.66296	5.90112	7.14536	7.6993	7.33147	7.46769	6.70155	6.76436	6.61283	6.71969	6.54402	6.64997	7.06762	7.65207	6.19105	6.72762	7.23521	7.38554	7.89525	6.18285	6.9194	7.02911	6.05611	7.70278	7.97354	4.90142	4.9994
FAM187B	0.750918	0.0357838	0.070091	7.16732	6.4164	7.1294	7.4139	8.03941	6.79984	7.91369	7.27253	6.47925	8.13791	7.80642	5.96491	7.88178	7.44252	7.33438	6.72102	7.79544	7.01188	7.99254	7.46652	7.46365	7.59199	8.1356	7.96629	7.83328	7.89235	8.0728	7.62588	7.02929	6.66468	4.79524	6.75551	7.73957	6.77262	7.98163	8.21699	7.95331	8.26627	7.44454	7.24198	7.79216	7.76194	8.16614	8.50131	5.62509	6.1478
FAM195A	0.692194	0.00243809	0.0077316	8.84669	8.1545	8.95206	9.34373	8.83038	9.69339	8.65622	7.90612	8.08273	8.62584	9.03375	8.65226	8.18715	8.40556	8.12993	8.1644	8.34386	8.12931	8.14506	8.70459	8.55281	8.75225	8.65545	8.73288	8.24146	8.7186	8.87212	8.81217	8.61088	8.36942	10.204	9.27636	8.1841	8.53971	9.05049	8.59762	8.66852	8.30706	8.17571	8.96788	8.57025	9.17951	7.64248	8.06784	10.6724	9.30775
FAM198A	0.607436	0.000114547	0.000560367	6.0789	5.47146	6.13824	6.3041	5.55425	6.20111	6.11024	6.72954	6.12188	5.90557	6.07711	6.23902	6.27446	6.17956	6.6375	5.52234	6.7116	6.61607	6.17529	6.08458	6.30213	5.54036	6.01746	5.74188	5.49001	5.59159	5.90375	6.07648	5.87498	5.79079	7.65043	6.00812	5.47579	5.64544	5.97356	5.77538	5.55193	5.37877	5.67553	6.13962	5.74787	5.71132	6.20111	6.27387	7.0365	6.36158
FAM205A	0.813544	0.010358	0.02578	8.98633	8.17278	8.57597	9.40409	9.78527	7.48271	9.48942	9.81092	8.87977	9.38204	9.68926	8.3298	9.28206	9.48859	9.39084	9.22339	9.37183	8.93503	9.61638	9.4372	8.95292	9.65826	10.2054	9.95991	10.201	9.8739	9.71192	9.15497	9.3574	8.95292	7.40453	9.25083	9.47772	7.31719	9.07712	9.62853	9.35892	9.38892	9.22196	9.29995	9.04867	9.17644	9.33197	9.42086	7.91236	8.70379
FAM212B	0.750945	0.000976584	0.00355291	8.2691	7.51816	8.0081	8.38725	8.85287	7.78804	8.74677	8.78624	8.05171	8.60957	8.78736	7.65476	8.55007	8.62192	8.57099	8.39471	8.53749	8.26762	8.68835	8.72227	8.50374	8.62365	9.03262	8.64465	8.74359	8.70544	8.62657	8.70459	8.56444	8.15395	6.10867	8.88442	8.99306	7.65437	8.56463	9.0633	8.69056	9.256	8.4396	8.66197	8.66413	8.67039	8.8923	8.74912	7.30665	7.44066
FAM218A	0.898218	0.000170672	0.00079128	6.69926	5.80105	6.77897	6.51246	6.83915	6.09362	7.32837	7.13177	5.67422	7.14886	6.74862	6.59762	7.2802	6.33274	6.40455	6.3084	6.373	6.64496	6.834	6.97236	6.75322	6.56061	6.9991	7.43125	6.84444	6.72567	6.68326	7.15119	6.56629	6.18285	5.73676	6.91655	7.11829	5.35753	8.04781	7.64596	7.53901	7.4798	7.65966	6.6423	7.2818	7.7469	7.64469	7.16403	4.98458	6.71022
FAM21EP	1.82471	1.402e-08	1.72183e-07	8.2155	6.39079	8.24359	8.62071	9.41688	7.50148	8.85057	8.70262	6.93001	9.17705	8.75634	7.11973	8.5022	8.78095	8.48274	8.46336	8.84285	8.07515	9.15292	9.02964	8.39112	9.13062	9.37546	8.44203	9.04606	9.14698	8.8489	8.39629	8.19697	8.29245	7.4193	8.53392	8.67806	6.94996	8.67827	8.81741	8.5314	9.01435	8.55082	8.57283	8.81524	8.81415	9.30555	8.54006	5.76945	6.88229
FAM222B	0.612573	0.00441143	0.0127104	9.2795	8.66692	9.38962	9.20669	9.76113	9.20602	9.58719	9.3574	9.50364	9.34334	9.8317	9.27851	9.37222	9.46644	9.48687	9.2756	9.57883	9.37261	9.45658	10.1047	9.22811	9.44641	9.76852	10.1417	9.52301	9.59935	9.62902	9.59671	9.47735	9.5407	7.83759	9.7326	9.93908	9.22775	9.51119	9.8332	9.63359	9.68647	9.3635	9.53388	9.32492	9.64215	9.79563	9.90379	8.3418	8.92497
FAM230C	0.724408	0.000353571	0.00148954	4.99421	4.2698	4.56764	5.4077	4.48481	3.92806	5.54292	5.75614	4.80061	4.84874	4.82087	4.28345	4.22417	4.43068	4.70831	4.21058	4.17907	4.43802	4.80804	5.14954	4.39978	5.4912	4.53558	4.5228	5.04403	5.11669	4.80061	5.28829	5.61364	4.89919	7.14536	5.28483	5.75667	4.25717	4.5228	5.10101	4.81069	4.82018	5.04045	5.4636	5.03417	5.63424	4.70831	5.01303	4.94242	6.27939
FAM27B	0.808062	0.00612538	0.0167362	7.08149	6.27343	6.52233	6.69675	8.56599	6.88464	5.95654	6.76199	6.15099	6.59451	8.74819	6.4116	6.94354	6.26001	7.13082	6.95315	7.16612	6.62927	9.03622	7.43165	6.06202	7.71649	8.45864	7.30177	8.06678	7.62132	7.1854	7.3294	7.01146	6.89778	6.41335	7.30081	6.98637	7.08647	7.30359	7.74708	8.06522	8.56425	6.87836	8.1919	7.93428	7.04105	7.99223	7.92412	6.06631	6.42677
FAM60A	1.0663	6.76471e-10	1.08844e-08	10.5576	9.49129	10.5582	10.3636	9.88313	10.3142	10.1316	10.5655	10.8579	10.5315	10.2372	10.7309	11.1511	10.8428	10.7277	10.7844	10.2133	11.7824	10.4707	10.6991	11.1598	9.87666	9.97416	10.2622	10.4423	10.5434	10.4221	10.8694	11.0503	10.6816	10.4793	10.4993	9.56709	11.1948	10.4466	10.2739	10.9836	10.0773	9.88416	10.2126	10.5492	10.417	10.658	10.1417	10.5827	10.9554
FAM64A	0.817644	3.53101e-06	2.55663e-05	7.9211	7.10346	7.42929	7.98345	7.71905	7.36247	8.02196	7.46615	7.852	8.19808	7.69658	7.97513	8.08397	7.44066	7.09254	8.07892	7.35844	8.85287	7.73552	7.54529	7.68869	7.97824	7.15634	7.625	7.96254	7.5004	8.45315	8.70037	8.71487	7.90326	6.99719	7.78595	8.02319	7.34812	7.84743	7.36111	7.79682	7.56411	7.74241	7.46147	8.43356	7.66405	8.02064	7.31347	7.9341	8.34406
FAM71A	0.732988	0.00687528	0.0183984	8.5852	7.85221	8.39136	8.98198	9.31377	7.68205	9.00251	8.91884	8.45498	9.1203	9.02273	7.91683	8.68835	8.92497	8.83445	8.56815	8.92079	8.51341	9.09881	9.10192	8.6404	9.27152	9.64317	9.65167	9.39475	9.37732	9.0835	8.46922	8.70787	8.39024	7.60557	9.36649	9.05646	7.78507	8.87977	9.5131	9.2674	9.27821	8.7598	9.32263	8.8982	8.96565	9.21466	9.845	7.45148	7.88824
FAM71D	0.687045	0.025698	0.0537941	6.89275	6.20571	7.06741	6.90728	7.07968	6.8033	6.64937	7.25819	6.89746	7.2369	7.61406	7.03083	6.95632	7.27576	7.27648	8.39278	7.38288	6.68792	7.09465	7.94552	6.66628	6.91487	8.40034	7.24235	7.28728	6.78324	7.00547	6.89704	6.93741	6.35787	7.89568	7.27788	7.36168	7.12345	6.87315	7.66384	6.79765	7.62241	7.47369	8.2781	6.62024	7.69049	8.53115	8.46278	5.65947	5.97816
FAM71E1	0.637964	0.000243173	0.00107909	7.84462	7.20666	7.0086	7.60114	8.465	7.60429	7.43664	8.23413	7.30231	7.61056	7.62543	7.21494	7.74516	7.32987	7.73503	7.68845	7.25406	7.18304	8.03773	7.78962	7.14975	8.44377	7.88722	8.70089	8.55925	7.9336	7.70922	7.64023	8.1919	8.01303	7.9878	8.23897	8.15568	6.84388	8.02217	8.55203	8.35749	8.70601	7.49031	7.69508	7.64469	7.84943	8.64641	7.56474	7.73368	8.96129
FAM71F2	1.01502	0.000186704	0.000855339	7.84134	6.82632	8.06378	7.64349	8.52969	8.16938	8.1412	7.76014	7.75583	8.30932	8.03773	7.74653	8.0999	7.99387	8.03657	7.7377	8.14242	7.89425	8.53529	8.72334	8.01976	7.78141	8.11101	8.4937	8.32771	8.28441	8.06421	7.94227	8.06562	7.74808	6.73909	8.37101	8.62688	8.41732	8.36319	8.41773	8.6019	8.85564	8.3418	8.42513	8.17308	8.28376	8.45049	8.46972	6.46458	6.79785
FAM72A	1.23804	1.92252e-05	0.000117456	9.04751	7.80947	9.17617	9.16294	7.81987	8.10517	10.3362	9.03943	8.31089	10.1793	9.36104	9.38926	9.73019	8.18137	7.28354	9.34334	7.95953	9.52743	8.9392	9.02214	8.17718	9.35926	8.07686	8.36535	8.94752	7.04286	9.36002	9.99517	9.82918	9.24938	8.96469	8.89178	8.66197	8.82745	8.89151	6.5475	9.17644	8.62746	9.52477	9.16599	9.68926	8.44327	9.62544	9.11027	9.0576	9.68455
FAM81A	0.700191	0.0231001	0.0493493	8.23743	7.53724	8.135	8.78789	9.24213	7.06049	8.9112	8.7542	8.24567	8.60927	8.95088	7.73065	8.33	8.89326	8.67852	8.20498	8.57165	8.2129	9.13251	8.98336	8.49437	8.89557	9.46967	8.70112	8.96442	8.87734	8.73504	7.87706	8.46643	8.1182	6.16925	8.60877	8.45009	6.88656	8.48575	9.03565	8.61493	9.00525	8.40429	8.80579	8.63026	8.77536	9.10952	9.09484	7.93606	7.5713
FAM81B	1.73649	1.01488e-05	6.61738e-05	7.42433	5.68784	7.40317	7.39817	8.5913	7.35279	7.45075	7.84076	6.52253	7.41711	7.12241	6.03097	7.80432	7.53901	9.73934	8.5222	8.09162	6.94861	8.18028	7.9707	7.75441	7.8137	8.07259	7.19749	8.26486	9.28545	7.34643	6.56676	7.53087	6.89688	4.35386	7.24931	8.17693	6.55201	7.65572	8.70837	8.28462	8.81415	8.11591	7.70181	8.83473	8.15587	8.47658	7.67213	4.89272	5.60803
FAM83D	2.53041	6.85318e-14	2.37577e-12	9.30619	6.77577	8.87409	9.54208	9.25638	8.39718	9.66763	9.75122	9.60239	10.1727	9.56251	9.91037	10.0754	8.44428	7.31137	9.67166	7.99129	10.1118	9.53055	8.9616	8.76986	9.45504	7.59	9.13452	10.2982	7.55747	9.81638	9.48505	10.1898	9.00199	8.85171	9.01696	9.22632	8.0771	9.30696	7.97051	9.10846	7.89149	9.24458	8.82298	9.02369	8.59066	9.49023	9.10563	9.94631	10.2246
FAM83H	0.948128	1.25964e-06	1.02201e-05	8.83212	7.884	9.32839	8.77108	8.46162	9.60067	8.09058	8.91754	9.52703	8.69873	8.96838	8.40774	8.43825	9.64934	8.47968	9.3861	8.88093	8.73333	8.551	9.03204	8.69195	8.95063	8.64296	8.80292	8.52747	8.8292	8.87807	9.27521	8.31888	9.48816	10.0554	8.67459	8.42288	10.4809	8.25639	8.19016	7.85865	8.57554	9.31773	8.36657	8.21699	8.966	8.38775	8.53371	8.63822	9.15973
FAM86B1	0.832184	0.0266881	0.0554255	9.25179	8.41961	8.7403	9.81694	10.3498	7.89149	9.54918	9.91141	9.19448	9.39339	9.84662	8.31969	9.89091	10.0309	9.85092	9.54695	9.87621	9.47772	10.1956	9.31558	9.29643	9.85911	10.5801	10.3122	10.4368	9.9941	9.87446	9.47898	9.56969	9.04397	8.01379	10.3778	10.0575	7.41525	9.7489	10.5434	9.89973	10.17	8.98165	10.2217	9.66763	9.68744	9.98562	10.341	7.71788	7.71086
FAM90A1	0.813883	5.15281e-05	0.000279906	7.61319	6.79931	8.27836	7.07059	7.7155	7.76383	7.4154	7.08182	7.22791	7.43395	8.25957	7.88482	7.64107	7.91662	7.37042	7.35719	8.24719	7.88824	7.19973	7.85787	7.73912	7.58362	7.2375	7.7522	7.32307	7.30696	7.86809	7.51975	7.71736	7.69637	7.34124	7.90629	6.86106	7.01437	7.30717	7.1103	8.34064	6.811	6.885	6.5734	7.75967	6.77113	6.41276	7.09676	8.14943	8.58711
FANCI	0.901631	4.61247e-07	4.11436e-06	8.25566	7.35403	8.11431	8.38212	8.67334	7.5717	8.43265	8.90405	7.75538	8.3705	8.8982	7.20746	8.01625	7.85258	8.02237	7.83379	8.05345	8.17013	8.69985	8.29154	8.14943	8.31416	8.50843	8.32856	8.64151	8.29544	8.3298	8.40043	8.60957	7.90304	8.00128	8.52677	9.22911	7.14007	8.26024	8.46692	8.80752	8.6141	8.44134	8.19277	8.75549	8.54715	8.70864	8.65463	7.75916	7.92249
FARSA	0.612367	0.00217413	0.00702403	8.55195	7.93959	8.56155	8.28138	7.89508	9.41538	8.46567	8.09314	8.38504	9.19448	8.49006	9.07683	8.80752	8.9015	8.17785	8.6528	7.80748	8.89352	8.20429	8.36745	8.47707	8.99148	7.57875	8.0528	8.11218	8.08973	9.13756	7.71315	9.00223	8.91994	8.85451	8.44279	7.79161	8.59962	8.3125	8.0687	8.42418	7.24484	8.17613	8.04055	8.54858	8.40429	7.46182	7.77674	9.43037	9.11895
FASTK	0.624987	7.2708e-05	0.000379982	9.4206	8.79561	9.38812	9.22009	9.45952	9.40636	8.70205	8.96254	10.1163	9.32037	10.3484	9.67426	9.33606	9.41017	9.49429	9.42496	9.14358	9.0835	8.85767	9.42537	9.69771	9.16392	9.16136	8.99462	8.61181	9.42223	9.90168	10.2047	9.14218	9.74189	9.98257	9.69028	8.96871	9.90168	8.98278	8.9112	9.00804	8.87347	9.52743	8.91821	9.05646	9.52253	8.33069	8.6826	9.91507	9.5701
FBLIM1	2.53502	2.19428e-22	4.25466e-20	10.0059	7.47088	10.0081	10.0293	10.2873	9.84122	10.166	10.0543	9.9119	10.1068	10.4843	9.76624	10.0944	10.3128	10.3255	9.85042	10.186	9.86317	10.0925	10.7064	9.86932	10.0439	10.3945	10.4202	10.1288	10.1309	10.1836	9.76358	9.93355	9.67717	7.73486	10.0519	10.4566	9.82124	10.3307	10.5695	10.5882	10.835	10.3388	10.2358	10.429	10.7064	10.6559	10.344	9.53013	9.81638
FBXL14	0.7036	4.62157e-06	3.25459e-05	8.51397	7.81037	9.16006	8.14755	9.0689	9.10993	8.6851	8.2129	8.45049	8.70379	8.93534	8.77807	8.87409	8.75609	8.63954	8.64326	8.73846	8.66666	8.69956	9.76668	8.74832	8.42397	8.08234	8.6477	8.3842	8.66939	8.5314	8.29271	8.78373	8.18471	8.59264	8.65411	8.17764	9.17261	8.30817	8.47068	8.64118	8.69112	8.98133	8.49024	8.34519	8.48181	8.74728	7.92798	8.33764	8.51315
FBXL18	0.635954	0.00392197	0.0115336	8.51612	7.88016	8.13997	8.64296	8.90465	7.73407	8.75118	8.91694	8.52076	8.56815	8.76462	8.21762	8.6696	8.53064	9.07137	8.74383	8.67852	8.64742	8.70404	8.78566	8.34893	8.8043	8.95088	9.53306	8.8124	8.8244	8.99393	8.99499	8.92853	8.82682	7.05875	9.21613	9.35181	7.64993	8.87239	9.30444	9.11412	8.89069	8.57063	8.72911	8.64249	8.66852	8.82298	9.32037	7.76331	7.98678
FBXO15	1.14239	0.0115583	0.0282054	9.98548	8.84309	9.68362	10.6849	10.8208	6.81967	10.4202	10.5349	9.48982	10.5846	10.8655	8.84172	10.3347	10.3644	10.6029	9.33959	10.349	9.87927	11.0582	10.5978	10.0708	10.81	11.0362	10.1981	10.9173	10.9243	10.6009	10.1268	10.1844	9.14792	6.97441	10.4501	10.3484	7.01356	10.8231	11.1169	11.0086	11.4361	10.7461	11.3518	11.3656	11.3437	11.5801	11.6529	8.6677	9.69442
FBXO6	0.786002	0.0116806	0.0284371	7.52233	6.73632	8.94176	8.40904	7.6917	8.63514	7.08417	8.66594	6.98759	7.05449	8.38775	6.50505	6.9983	7.24293	7.16833	7.37396	7.34009	5.82038	6.09979	7.27905	7.25942	7.57939	7.65267	7.03989	6.39149	6.30821	8.03307	7.45358	6.12103	7.96542	8.49321	9.24766	7.39529	6.72664	7.16319	6.34713	6.81469	8.22874	8.07428	7.00006	6.95294	6.07885	6.02335	5.78876	8.27587	9.07227
FBXW4	0.688292	0.00493911	0.0139704	10.1824	9.49408	10.0708	10.2847	10.6532	9.59423	10.3812	10.3455	9.9499	10.5492	10.6691	9.32798	10.3198	10.4626	10.2888	9.44676	10.1895	9.83278	10.5665	10.6221	10.1523	10.3191	10.7427	10.3448	10.5481	10.7733	10.3564	9.38999	10.0135	9.39917	9.47257	10.2566	10.3168	8.8489	10.8489	10.9358	11.0003	11.1002	10.6635	10.8375	11.2113	11.3611	11.1847	11.055	9.84072	10.5636
FCRLA	1.10154	0.000151804	0.000716881	7.63265	6.53112	7.51589	7.99044	8.36496	7.25591	8.21718	7.89444	7.54675	8.10741	8.06766	6.92905	7.95275	7.87596	7.76939	7.63748	7.98363	7.61525	8.01904	8.20826	7.7369	8.0019	8.03715	8.07733	7.98026	8.22057	8.03179	7.93318	8.3298	7.53675	6.98035	8.38683	8.26528	6.9735	8.19632	7.95841	8.14841	8.01036	8.16484	8.17191	7.96294	8.09476	8.08538	8.65034	6.39046	6.92352
FDPS	0.741786	0.000103668	0.000513958	10.2847	9.54293	10.7612	10.4202	9.83227	11.2658	10.3722	10.1209	10.5477	10.6707	10.2195	10.632	10.9679	10.5665	10.5518	10.7121	10.3622	11.2097	10.316	10.1198	10.7309	9.96496	9.40705	9.46967	9.38926	9.74579	9.71356	10.373	10.223	11.0212	10.6601	10.139	9.4562	10.8067	10.1942	9.54952	9.28952	9.64365	11.0475	9.58676	9.715	9.71868	9.57996	9.73454	10.2146	10.6701
FDPSP5	0.850561	5.5848e-08	6.01885e-07	7.0158	6.16524	7.20999	7.05313	8.3264	7.85578	7.16776	6.8982	6.98444	7.20265	7.02988	7.24484	7.40807	7.07621	7.08343	7.25177	7.0218	7.77238	7.12987	6.68945	7.53657	7.17913	6.88793	6.37776	7.06167	6.7876	6.61591	7.10562	6.84725	7.15947	5.9847	7.56255	7.25808	7.04027	6.77817	7.13002	5.95521	6.78247	7.55548	6.41314	6.61858	6.68201	6.97906	6.42757	6.73441	6.88731
FEN1	1.01603	1.37981e-10	2.54597e-09	9.82454	8.80851	10.3993	9.69872	9.23051	9.73019	10.0856	9.86768	9.94199	10.1874	9.68091	10.6724	9.78872	9.49276	8.86884	9.5373	9.71537	9.98432	10.007	9.34334	9.90957	9.92017	9.5131	9.7982	9.72359	9.28317	9.84609	9.90551	10.4993	10.0266	9.5487	9.61341	10.1829	8.92025	9.75672	9.28882	9.67878	9.44641	10.0432	9.75872	9.59423	9.15945	9.80732	9.75012	9.95434	9.77411
FGD5	0.723676	0.00023932	0.00106509	7.97486	7.25118	8.05107	7.91157	7.94261	7.34376	8.08416	8.20147	7.98345	8.11537	8.02454	7.31347	8.07537	8.43497	7.91683	7.65536	8.0439	8.02108	8.1626	8.18632	8.02108	7.96565	7.91392	8.45093	8.05957	7.73912	8.1284	7.77944	7.64023	7.74042	9.35009	7.83483	8.29227	7.10979	8.39629	8.25912	8.25487	8.77391	9.20162	8.2116	8.38936	8.36409	8.2538	8.10992	7.27355	8.05614
FGF18	0.842359	8.06462e-05	0.000415489	8.19647	7.35411	8.13647	7.69148	8.12583	7.90243	8.21027	7.72257	7.66241	9.26142	8.02407	8.29154	8.81164	8.41524	7.87176	8.83748	8.43241	8.8124	9.39994	9.56163	8.27519	7.77808	7.64522	8.65411	7.97863	7.69785	7.56578	8.48325	8.91552	8.56425	7.05134	7.18182	7.18874	8.74067	7.57774	8.10648	7.73792	8.06339	7.57444	7.72461	8.32811	7.66823	9.11509	8.76069	8.13541	8.83942
FGF4	0.663039	0.000233179	0.00104161	7.17542	6.51238	6.74862	7.02682	7.29514	6.89863	7.52067	7.05353	7.00383	7.07859	7.17812	6.73299	7.03896	7.10304	7.03152	7.26115	7.03453	7.15371	7.15768	7.12226	7.01056	6.93922	7.2707	7.26742	7.06685	7.08804	7.07885	7.06984	7.27151	7.19158	7.19749	7.20072	7.61171	6.47261	7.37565	7.36131	7.42538	7.37064	7.15555	7.20339	7.73733	7.97906	7.2408	7.24426	6.9735	6.88563
FGFBP1	0.94661	7.4502e-10	1.19287e-08	7.71442	6.76781	7.92556	7.6441	7.46232	7.38474	7.97991	7.64369	8.36786	7.3213	7.83697	7.41732	7.44653	7.42216	7.66304	7.497	8.28667	7.23867	7.34651	7.64349	7.79884	8.09078	8.08254	8.10632	7.31568	7.55043	7.99772	8.43707	7.4141	7.59077	7.01817	7.8368	8.40973	7.83461	7.34482	8.08699	8.05935	7.51389	8.33366	7.48781	6.99623	7.31017	7.38765	8.88607	7.88662	7.89172
FHDC1	0.96476	0.0123912	0.0298306	10.2577	9.29298	10.1021	10.6559	11.3011	10.1866	10.5951	10.8046	9.86232	10.7473	11.1243	9.58102	10.8414	10.6356	10.7393	10.2393	10.5771	10.3796	11.0003	11.1169	10.0129	10.9485	11.5011	11.0254	11.1213	11.1081	10.9934	10.4817	10.3067	9.78277	7.25076	10.7064	11.0228	10.0229	10.7542	11.2602	11.3216	11.3175	10.9883	10.8159	11.3274	11.2505	11.4841	11.1314	8.40317	9.41642
FILIP1	1.83511	2.0954e-13	6.64029e-12	7.67412	5.83901	7.84506	7.87725	8.06315	8.15742	8.37364	7.68125	7.21905	8.09574	7.78718	7.38024	8.39175	8.12694	8.1546	7.15197	7.71453	8.48507	7.94192	7.94794	9.8863	7.66443	7.61664	7.08438	7.74143	7.64743	7.70257	7.09913	7.12787	6.91078	7.05678	7.11575	7.24061	6.70825	7.86556	7.5557	8.53094	7.39121	7.44902	7.91705	7.93233	8.03265	7.9707	7.97377	6.09936	6.86503
FIZ1	0.67164	0.0352485	0.0693155	11.3273	10.6557	11.0376	11.7027	11.9384	10.6874	11.6465	11.6729	11.1121	11.6916	11.9247	10.5434	11.8344	11.7584	11.7525	11.1169	11.7796	11.2798	12.1815	11.7824	11.372	11.9952	12.3713	11.8142	12.1077	12.0068	11.7917	11.0876	11.2505	10.6952	9.65531	11.5826	11.8047	10.5012	11.7558	12.1488	11.8963	12.1181	11.594	12.0394	12.0346	11.9703	12.2662	12.2607	10.2764	10.9034
FJX1	1.49332	3.00691e-06	2.21715e-05	10.6724	9.17906	10.8996	10.6778	10.991	10.6907	10.9008	10.8524	10.4082	10.7267	11.5284	10.1679	10.8812	11.0829	10.836	10.334	10.9615	10.632	11.3656	11.6041	10.7659	10.732	11.3656	11.1983	11.0064	10.975	10.9667	10.3448	10.48	9.88473	9.4562	10.7121	11.0533	10.6191	11.3544	11.6096	11.3915	11.9083	10.9868	11.1018	11.8211	11.5179	11.6293	11.3939	9.49741	9.85911
FKBPL	0.857351	6.90506e-08	7.27719e-07	8.3924	7.53505	8.42265	7.98617	8.33458	9.049	8.2157	8.2892	8.63982	8.71357	8.13687	9.3415	8.15587	8.5325	8.2178	8.62562	8.47968	8.73027	8.12694	7.73273	8.35563	8.60309	7.86365	8.47789	8.0437	8.41508	8.725	8.20364	8.64276	8.85793	7.56592	7.9959	8.1622	8.65907	8.49659	7.69597	8.26719	7.913	8.37101	8.04832	8.53902	8.01775	7.3581	8.241	8.50484	8.83965
FKSG49	1.14343	1.8137e-05	0.000111492	10.4604	9.31692	9.78927	10.6917	10.7771	9.03622	10.5538	10.6447	10.2343	10.4034	10.8914	9.78582	10.6701	10.5249	10.868	10.3468	10.5021	10.3107	11.055	10.6479	10.3498	10.9358	11.2861	10.9706	11.1948	11.1169	11.0187	10.2175	10.6258	9.95382	9.01196	10.9299	11.1652	9.42799	11.0056	11.3395	11.1195	11.7525	10.9146	11.3081	11.5129	11.5334	11.4276	11.5915	9.72967	10.166
FLAD1	0.723381	1.55212e-05	9.70285e-05	8.95383	8.23045	8.7094	9.26813	9.93294	8.9964	8.99393	9.35121	8.75317	9.42799	9.27708	8.50966	9.00559	9.11509	8.94691	8.66251	9.20768	8.8523	8.99428	9.51236	8.99306	9.17122	8.96283	8.98592	9.3415	9.48088	9.34334	8.82807	9.23051	8.89178	7.9463	9.42769	9.03344	8.33323	9.02369	8.96996	9.09585	9.31101	8.90498	9.19331	9.03985	9.2921	9.07353	8.90558	8.40273	8.81074
FLJ13744	0.720444	0.0203865	0.0445546	7.11583	6.39538	7.10713	6.8775	8.13893	6.32595	7.33466	7.40675	6.65683	7.73563	7.56395	6.22849	7.33109	7.28478	6.98278	6.74377	7.8831	6.78936	8.23983	7.76383	6.91148	6.71681	7.68735	7.83827	8.08917	7.76811	7.55315	6.74841	7.38041	6.6257	4.66171	7.27297	7.33221	9.01814	7.82142	8.48621	7.76811	8.67237	6.95701	7.52302	8.0361	7.79066	8.46425	7.0566	6.06722	5.92466
FLJ21408	0.811404	7.35732e-05	0.000383627	7.16065	6.34925	6.91112	7.40411	7.88201	6.80729	7.48153	7.03286	7.04959	7.28692	7.76085	6.90612	6.85135	7.26674	7.28676	6.8939	7.33981	6.92885	7.75775	7.59999	7.20417	7.19475	7.7377	7.57326	7.6876	7.49337	7.67911	7.15715	7.70965	7.35258	8.17718	7.66711	7.71923	6.64409	6.9889	7.85613	7.0302	8.11751	7.14991	7.3466	7.65207	7.18608	7.70036	8.07048	5.95521	5.98082
FLJ22184	0.932352	0.00732826	0.0193886	8.96641	8.03406	8.16807	9.11124	10.026	7.39465	9.38434	9.53013	8.48686	9.25455	9.29574	7.85077	9.07193	9.28075	9.41288	8.70037	9.23814	8.78015	9.87126	9.30989	8.80685	9.4197	9.97587	9.67062	10.039	9.88585	9.42993	8.48899	9.27596	8.66332	8.05237	9.52942	9.44396	7.78574	9.32263	10.1734	9.87446	10.5222	9.20066	9.71577	10.17	9.77411	10.2847	10.0095	7.57539	8.19492
FLJ22763	0.61388	5.44138e-06	3.76698e-05	5.1954	4.58152	5.30332	5.42131	5.06293	5.71586	5.74787	5.18512	4.94071	5.47139	5.68927	4.82414	5.74536	5.22592	5.3242	5.21587	4.94071	4.72413	5.34889	5.33846	5.39753	5.17987	5.18463	4.6402	5.00476	5.46292	5.07721	5.00476	5.25973	5.11996	5.95954	5.13117	5.61696	5.25144	5.18099	5.08354	4.60218	5.2163	5.11317	5.55872	5.7221	5.68029	6.02438	5.35724	5.04655	4.6143
FLJ23867	0.785782	1.36264e-05	8.60967e-05	9.54601	8.76023	9.25838	9.71148	9.30846	9.43939	9.72001	9.245	10.199	9.37732	8.92471	10.2832	9.47257	10.1102	9.70254	9.14464	9.18602	10.5801	9.57061	9.39167	9.02187	10.2358	9.62054	9.68703	9.60112	9.37355	9.00369	9.41502	8.89986	10.1288	9.01435	9.36846	9.9009	10.6327	9.43974	9.8788	8.85484	8.2118	9.82464	9.54358	9.28393	9.977	8.90709	9.42414	9.15804	9.77621
FLJ30679	0.723436	0.0391932	0.0753997	8.08278	7.35934	7.83637	8.06339	8.96838	7.27943	8.64955	8.56645	7.98678	8.56622	8.59471	7.58056	8.38793	8.55847	8.17285	7.96521	8.48483	7.91236	8.75715	8.85287	8.06944	8.71882	8.81524	8.67141	9.0259	8.94867	8.70232	8.42144	8.7146	8.19697	5.29773	8.6803	9.43088	7.57187	8.51162	9.01638	8.66068	9.34899	8.60642	8.81026	8.93137	8.94371	8.97179	8.82807	6.467	6.95886
FLJ31715	0.635634	0.00363727	0.0108051	7.11987	6.48424	6.9464	7.39179	8.37731	6.61248	6.99607	7.11736	7.35993	7.24293	7.17761	6.66183	7.01437	7.47347	7.15119	7.31929	7.46832	6.08935	7.28116	7.81905	7.43269	7.40533	7.72075	7.23316	7.95154	7.53786	7.75387	7.09718	7.21514	7.03989	5.52544	7.70629	6.85504	7.18438	7.20607	7.96055	7.41896	8.4023	7.56705	7.86045	7.09783	7.2044	7.56094	7.91345	6.42798	6.28111
FLJ32255	0.617784	3.67876e-05	0.000207886	6.67075	6.05296	6.77262	6.46199	6.58905	6.94481	7.14628	6.54444	6.82436	6.55955	6.75832	6.19036	6.37615	6.78213	6.288	6.08187	7.11464	6.10404	6.79705	7.26059	6.45793	6.62108	6.81396	6.55368	6.54184	6.30213	6.7885	6.2564	6.37572	6.25494	6.19166	7.05078	6.82777	7.11736	6.76222	7.10283	6.81528	7.0859	6.94134	7.06932	6.83139	6.98016	7.49753	7.10811	6.06068	6.97526
FLJ32790	0.682615	0.0169544	0.0383849	5.3601	4.67749	5.13259	5.18371	5.19586	5.41693	4.90098	5.07124	5.33324	5.02685	5.18243	5.02002	5.23816	5.32742	5.59659	4.88411	5.19884	5.16713	5.27869	5.43952	4.9154	5.35424	5.13117	5.08301	5.5971	5.49832	5.05771	5.27748	5.21506	5.12991	11.288	5.58785	5.27277	5.34321	5.4132	5.57687	5.61916	5.74108	5.07076	5.48116	5.44178	5.35571	5.72343	5.69076	5.57119	5.06248
FLJ41455	2.59825	2.65962e-09	3.81442e-08	6.88331	4.28506	7.55825	7.67379	6.15288	4.56853	6.9071	6.14949	5.62965	7.39781	7.54314	8.75118	7.32152	6.98109	6.85192	7.38185	6.65967	7.23555	5.62227	5.01792	8.52407	5.57377	7.15274	6.2475	4.40529	8.31776	6.08316	8.61641	6.57864	9.12418	9.80997	6.82918	5.3851	6.5163	7.20589	6.71384	6.72403	5.30498	5.82441	7.67812	7.34082	8.44686	7.18282	5.70398	6.00026	7.58842
FLJ45825	1.03162	0.0129444	0.0308668	7.91693	6.88532	7.94591	8.52407	9.00308	6.73691	8.43591	8.49523	8.07476	8.61466	8.83576	7.10406	7.76403	8.54335	8.25512	7.66282	8.39801	7.68803	8.82493	8.83693	7.78345	8.60538	9.2436	8.22409	8.80373	8.74865	8.44157	8.1014	8.1546	7.82329	8.23787	8.6942	8.65167	6.71969	8.78239	9.22402	8.8284	9.25295	8.3426	8.2521	8.95345	8.7732	9.46324	9.14698	6.14216	6.16193
FLOT1	0.699017	6.04628e-07	5.26204e-06	9.94878	9.24976	10.4748	9.45952	9.73167	9.71868	10.1255	9.57463	10.1768	10.2787	9.53479	10.3347	9.53801	10.0869	9.74148	10.5096	9.94312	10.2692	9.77659	9.96496	10.1034	9.81339	9.50407	9.94077	9.93237	9.67461	9.87126	10.1822	9.57718	10.2629	9.06396	9.99241	9.56648	9.97416	10.0002	9.61341	9.84772	9.86829	9.94257	9.71761	10.0688	10.186	9.71252	9.72218	9.28241	10.3191
FLT1	0.608614	3.10028e-05	0.000179581	7.19658	6.58797	7.61365	7.36606	7.46898	6.9519	7.35719	7.32594	7.81662	7.57014	7.18946	7.44596	6.83235	7.05394	7.17007	7.16572	7.76169	7.08666	7.11153	7.44395	7.23381	7.45871	7.29836	7.17778	7.23867	7.26705	7.45418	7.35119	7.29528	6.9911	7.21925	7.41176	7.54529	6.57531	7.18082	8.07913	7.35677	7.33382	7.61802	7.26553	6.97422	7.26929	7.45418	7.52259	6.57419	6.62549
FMO2	1.01848	0.00581469	0.0160135	9.89782	8.87934	9.79082	10.4	10.9924	9.38578	10.3661	10.4423	9.63627	10.3878	10.8302	9.21502	10.3285	10.4556	10.2678	9.57106	10.341	9.52131	10.8996	10.8289	10.0537	10.5443	11.1243	10.5685	10.8566	10.7577	10.5403	9.35428	9.84878	9.25712	9.44982	10.3524	10.4013	9.50111	10.3232	10.7101	10.4457	10.7156	10.2295	10.7393	10.6377	10.7131	11.2165	10.6895	8.27499	9.14942
FOLR1	3.36006	1.3881e-14	5.51385e-13	10.4305	7.07044	9.7982	10.9384	10.309	10.7393	11.5381	9.22526	11.174	11.4426	11.0228	9.89867	11.9952	9.24726	9.77827	10.3967	11.2414	10.7716	10.1174	11.3611	10.5565	11.7988	10.84	10.4057	10.7209	11.0639	10.4834	8.65643	9.8367	12.0569	11.2708	11.4751	9.90278	11.6862	10.0403	10.8208	9.04996	9.90618	10.6221	10.7752	8.67712	10.0474	10.2559	9.77513	11.8176	8.98875
FOLR3	0.624082	0.0250466	0.0526804	6.50887	5.88479	5.4888	5.69708	8.11453	5.60484	7.69205	6.38163	7.44717	6.48465	6.91148	6.18579	6.20895	6.12499	5.7025	5.96865	7.64539	6.07029	6.77372	6.8067	5.42531	8.09162	6.35303	6.9113	6.59936	6.37776	5.58985	5.91343	5.66723	7.29452	8.08211	7.56027	5.74161	5.66052	6.12334	5.88438	6.05417	7.16494	6.14242	5.78205	5.5146	6.22313	5.27558	5.43344	7.69866	6.9113
FOXA2	1.0281	1.5017e-09	2.25009e-08	7.41118	6.38307	7.34447	7.78907	7.65555	6.59301	7.56705	7.61484	7.3213	7.77706	8.03123	6.96132	7.53695	7.84322	7.49482	7.60429	7.57674	7.16552	7.68284	7.92081	7.3884	7.77301	7.92435	7.86284	7.72234	7.64762	7.72644	7.8372	7.49969	7.68665	6.87614	7.96703	7.59108	6.62774	7.59021	7.63808	7.71156	7.58243	7.70395	7.36111	7.59661	7.61406	7.75093	7.98941	6.44337	6.45452
FOXA3	0.640548	0.0147804	0.034336	6.31102	5.67047	5.49632	7.80154	5.64036	7.67419	5.59359	6.0391	5.80036	7.61821	5.66052	6.23374	5.86808	6.10107	5.73152	5.78746	6.42461	7.38537	6.19412	5.89833	6.07207	7.33221	5.32702	5.70967	8.10596	5.57886	7.49969	6.96291	6.98457	8.13851	6.25475	5.73129	5.46116	5.68372	6.60342	5.65731	6.93426	5.28829	5.36872	7.1579	5.8377	6.10985	5.32455	6.00524	7.62047	7.84782
FOXF2	3.56111	3.50329e-16	1.89941e-14	9.1711	5.60998	8.68216	9.51554	10.0309	8.33928	9.52977	9.73538	8.8896	9.7837	9.97416	8.42023	9.53893	9.6129	9.57583	8.62975	9.62054	9.02158	10.1523	9.94881	9.1813	9.81694	10.2589	9.82702	9.92664	9.95751	9.83842	9.04633	9.11094	8.75692	6.7596	9.65826	9.69171	8.38132	9.85092	10.4385	10.3455	10.5087	9.62672	10.3425	10.2732	10.0869	10.3034	10.4457	7.43607	8.13033
FOXH1	1.17242	0.0149556	0.034669	8.46321	7.29079	8.52969	8.99336	9.70728	7.51656	9.20938	9.0788	8.26941	8.92618	9.58719	7.95887	9.27217	9.46478	9.09906	8.66594	9.46884	8.70262	9.93059	9.50193	8.79421	9.4233	10.3644	9.25414	10.0051	9.57996	9.37996	8.77724	8.93054	8.1108	6.96886	9.18158	9.27152	7.74725	8.81328	9.31965	8.79885	9.24662	8.52818	9.14392	8.97231	9.0788	9.40912	9.3497	6.6601	6.6385
FOXI1	0.621476	8.7459e-05	0.000445572	6.22689	5.60542	6.00333	6.12441	7.3363	6.29068	6.07816	6.19655	6.1499	6.56431	6.43943	5.85371	6.11557	6.35846	6.16459	6.20879	6.3227	6.08504	6.40493	6.704	5.98665	6.34318	6.57726	6.54306	7.02743	6.32495	6.71143	6.04446	6.01087	5.73936	6.85686	6.33919	6.54539	6.37078	5.97672	6.97097	6.61042	6.4583	6.79966	5.97578	6.18971	6.55671	6.66043	6.60874	5.478	5.64685
FOXJ1	0.757128	0.00941687	0.023847	7.63479	6.87767	9.40095	7.57656	6.38713	8.68835	6.47943	7.12329	7.53714	5.99353	7.57444	7.23477	7.09125	8.03676	8.89929	8.68535	8.01363	7.78877	8.11527	6.12087	8.2396	7.5717	6.78912	7.48114	7.29743	8.01709	7.77888	7.72027	8.29474	8.23648	7.81705	6.57745	7.79647	6.98278	7.44852	6.27857	8.0344	6.94172	7.81922	6.40434	9.35395	6.36724	7.0367	7.82049	8.1488	6.92582
FOXJ2	0.71369	0.00233535	0.00745593	9.73918	9.02549	9.80949	9.84991	10.1124	9.08734	10.0701	9.88936	9.58775	9.89918	10.1762	9.27636	9.81694	9.96618	9.99698	9.3348	9.93524	9.66397	10.085	10.1907	9.7735	10.1157	10.1768	9.78972	10.0015	10.413	9.94825	9.33563	9.63278	9.12063	8.43497	10.0462	10.0169	8.37463	10.2393	10.3737	10.3917	10.7515	10.1203	10.4006	10.5711	10.596	10.6862	10.6874	9.42769	9.71148
FOXM1	3.0692	2.30263e-17	1.55411e-15	8.65762	5.58843	9.16765	8.57816	8.75549	7.79292	8.25004	8.53228	8.52317	8.54935	9.27917	9.19782	8.73737	7.98836	7.14023	9.24999	9.04041	9.46278	9.17122	8.89986	8.46615	8.95292	7.09748	8.71882	8.69086	7.30568	9.22196	9.21908	9.57542	8.3365	7.00046	8.3565	8.50248	7.27771	7.63808	7.20207	8.77368	7.72681	8.01518	7.56027	9.33787	8.04055	8.69138	8.73027	8.82411	10.5386
FOXN1	0.603306	0.000178684	0.000824419	6.66797	6.06467	6.88543	6.5132	7.22394	6.78685	6.53856	6.59469	6.59508	6.14802	7.09086	6.15787	6.75322	6.58681	6.22363	7.51878	6.86202	6.452	7.01492	7.02659	6.50168	7.16266	7.63585	7.25979	6.55266	6.7442	6.67068	7.2259	6.30723	6.1173	6.34963	7.69107	6.86069	6.74318	6.67737	7.34393	6.6929	6.90221	6.57491	6.64343	6.83015	6.8779	6.92651	7.20497	6.19036	6.20438
FOXQ1	2.439	2.67828e-10	4.68136e-09	10.1444	7.7054	10.7782	8.68002	10.083	10.9821	10.5548	10.6917	11.3939	9.30254	8.81912	11.2066	9.11753	10.9808	10.7485	9.48463	11.3812	8.51868	11.1018	9.83069	9.84179	10.3945	11.2343	11.027	9.48982	9.65342	10.1229	11.1983	10.616	10.596	10.8208	10.4616	7.98201	10.1458	9.36846	8.49976	9.63051	9.54523	10.9106	10.3307	8.18159	11.2015	7.90304	9.26695	11.5885	10.9057
FOXRED2	0.67091	0.000391377	0.00162252	8.21368	7.54277	8.64174	8.24051	8.59086	8.82464	8.60456	8.32612	8.0683	8.41135	8.77493	8.65772	8.45049	8.45186	8.03482	8.16598	8.46667	8.09592	8.40185	9.04368	8.23293	8.27281	8.73424	8.53995	8.29623	8.39345	8.39906	7.86574	8.32771	7.919	7.02804	8.24612	8.21593	8.77368	8.2918	8.73245	8.61824	8.54044	8.47565	8.53392	8.48414	8.56815	9.13452	8.96385	7.40453	7.55139
FRMD3	1.08307	0.00198411	0.00650007	8.69456	7.61149	8.73873	9.03023	9.53519	7.76876	8.86026	9.51403	9.34299	8.46541	9.0689	8.32288	9.26226	9.13968	9.66812	9.03178	9.03871	8.897	9.15071	9.16719	8.78624	9.50547	9.64669	9.94825	9.87498	9.19546	9.55267	9.33271	9.1154	8.69792	7.0421	9.80475	9.4346	8.09629	8.81554	9.57224	9.12213	9.8317	8.82574	8.26762	8.88801	8.7225	9.01877	9.67663	7.60017	7.34447
FRMPD3	3.05748	3.88273e-13	1.15373e-11	9.03306	5.97558	8.71042	9.86481	10.1581	7.8468	9.55857	9.34334	8.63494	9.58874	9.845	8.06232	9.68499	9.59042	9.20505	8.62284	9.38507	8.49868	9.98993	9.82754	8.86595	9.82124	10.4748	9.71356	9.93115	9.80232	9.59084	8.79338	9.14104	8.90295	8.57864	9.50407	9.80128	7.64087	9.66561	10.2975	9.79987	10.3191	9.40264	9.99573	10.0525	9.97986	10.2479	10.594	7.22067	7.6088
FRS3	1.7056	2.74218e-09	3.9091e-08	8.69238	6.98678	8.05258	8.78095	9.31624	7.22791	8.86533	9.02465	8.98827	8.5325	8.95318	8.26162	9.12665	9.11991	9.45416	9.14104	9.25414	9.20269	9.44641	8.72415	8.86341	9.21833	9.23375	9.53986	9.59513	9.04606	9.1799	9.09249	9.02647	8.48641	6.82276	9.67878	9.51735	7.34145	8.93316	9.65301	9.19174	9.52042	8.96129	9.23659	9.19369	9.12185	9.27483	9.14914	7.89005	8.22874
FSBP	0.703326	0.000214737	0.000967542	7.24757	6.54424	6.7885	7.33221	7.21748	6.28429	7.32632	7.21806	7.99211	7.19907	6.94074	7.05623	7.01643	7.27297	6.56209	7.7533	7.51589	8.21718	7.56047	6.87255	7.88137	7.26477	7.36465	7.09783	7.30497	7.15715	8.54279	7.34048	8.16062	6.71969	5.56652	7.63049	6.71323	6.06161	7.43964	7.41194	7.63864	7.63107	6.48911	6.90332	7.80522	6.63008	7.23886	7.23653	7.58636	6.99072
FSTL5	0.737279	0.0449142	0.0840122	4.84596	4.10868	4.31368	4.37307	4.41987	4.28345	4.21862	4.49713	4.50224	4.83786	4.46412	6.43669	4.53071	4.22029	4.46515	4.47674	4.70757	5.03067	4.16525	4.41759	4.33385	4.01391	4.71984	4.77465	4.41081	6.74882	4.62973	4.25278	5.5565	4.41647	4.13695	4.94769	4.03166	4.05461	6.86847	4.22713	4.57062	4.26789	4.66791	4.1472	7.92365	4.13044	4.14211	4.08189	7.74742	8.41135
FTSJ3	1.83802	8.97118e-07	7.50496e-06	11.4308	9.59278	10.9934	11.853	12.2662	10.7671	11.6498	11.808	11.055	11.9043	12.3312	10.387	11.9908	11.9125	11.7388	11.183	11.9422	11.3477	12.5175	11.8868	11.4684	12.0294	12.7962	11.7444	12.3782	12.187	11.9462	11.0376	11.4841	10.545	8.45985	11.578	11.8247	10.0075	12.1435	12.4951	12.1922	12.6055	12.1648	12.2716	12.3782	12.7512	12.9946	12.7614	10.3636	11.2288
FUT1	0.589634	1.505e-07	1.48873e-06	8.10726	7.51762	8.11218	7.92719	7.86284	8.24738	8.01441	7.90261	8.32355	8.17264	8.05614	8.56302	7.99484	8.10072	7.99269	7.85473	8.04076	8.34588	8.35115	8.38347	8.17416	7.84846	8.0079	7.83343	8.15801	8.27302	7.87297	7.93255	8.06522	7.94261	7.98144	7.88024	7.73197	8.1097	8.24526	8.61641	8.38188	8.51366	8.31866	8.44705	8.25856	8.47189	8.61854	8.3615	8.91884	7.9179
FUT3	1.77911	1.08794e-07	1.10435e-06	8.39357	6.61446	8.18542	8.57597	9.34334	7.15049	8.78483	8.93078	8.75766	8.67635	8.8289	7.9179	8.92497	8.76986	9.14292	9.03344	8.77698	8.77908	8.80725	8.7353	8.65841	9.21324	9.26587	9.30775	9.53095	9.18961	9.28917	8.9343	8.91754	8.61387	5.82305	9.6196	9.38738	7.14244	8.71487	9.08312	8.88272	9.34666	8.44327	8.86122	8.80522	8.85057	8.8495	8.8289	7.38101	7.51531
FUT6	0.981249	0.00385424	0.0113655	9.5981	8.61685	9.25182	9.9941	10.5846	7.90075	10.1411	10.0204	9.45338	10.0645	10.2419	8.79047	9.96618	10.0293	9.99129	9.47988	9.99871	9.6111	10.468	10.2672	9.64267	10.3476	10.6644	10.306	10.5528	10.3893	10.2133	9.4346	9.69028	9.10414	8.16507	10.1216	10.2444	8.16015	10.0768	10.5574	10.3122	10.655	10.1594	10.6279	10.2896	10.3067	10.6365	10.6849	8.43497	9.01463
FUT8	0.894888	4.63795e-05	0.000254612	8.27018	7.37529	9.54167	6.6813	7.90922	9.18231	8.44856	8.35675	7.70468	8.85337	7.56647	9.13646	7.75002	7.97684	7.08573	8.713	7.7679	8.91353	8.51438	8.33237	8.02384	7.54611	7.92659	7.97133	8.4287	7.81118	7.9233	7.93521	7.93651	8.59107	7.34812	7.79233	8.10214	8.12037	8.96788	7.57428	8.4287	7.88137	8.69849	8.60485	8.01882	8.41907	8.17034	8.73159	8.40862	9.15764
FXR2	1.5252	5.92549e-08	6.3531e-07	9.47215	7.94694	8.88857	9.65122	10.0623	8.75474	9.76113	9.39412	9.30078	9.39445	9.91901	8.58783	9.86886	9.70899	9.88313	9.66078	9.73538	9.63903	10.1694	9.74534	9.57996	9.88358	10.4566	10.3353	10.2066	9.98625	10.0038	9.25712	9.69872	9.0689	7.98282	9.87126	10.4325	8.54519	10.1915	10.7078	10.0329	10.5305	9.70728	10.172	10.2054	10.0735	10.4265	10.4274	8.46922	9.04146
FXYD3	2.54634	2.47018e-14	9.37274e-13	10.6373	8.09098	9.98505	10.7967	11.2636	9.21908	10.9173	11.1169	10.444	10.5165	11.2822	9.51906	11.3193	11.258	11.1968	10.3396	11.0702	10.2951	11.5129	11.1259	10.2629	11.0448	11.5483	11.2249	11.5179	11.1707	11.19	10.3507	10.5087	10.2251	9.59567	11.2015	10.8579	9.40514	11.236	11.6244	11.236	11.6072	10.873	11.5085	11.2658	11.5154	11.5885	11.7525	10.2364	10.386
FXYD7	1.01956	0.00351746	0.0105174	7.98644	6.96688	8.41508	8.03501	8.82519	8.26656	8.25024	8.63473	7.73542	8.57025	8.73184	7.19511	8.17917	8.46856	8.18314	7.54887	8.31138	7.91529	8.82718	8.91005	8.04932	8.40384	8.71015	8.38255	8.81968	8.66986	8.30245	6.99493	7.42819	7.02988	6.41799	8.2903	7.75992	8.04194	8.78541	8.97355	8.71726	9.52477	8.64373	8.80077	8.99499	9.39284	9.46068	8.81692	7.08509	6.62888
FZD10	3.39017	2.15628e-10	3.83936e-09	8.30183	4.91165	9.29361	6.73279	9.33787	9.24283	6.71237	9.49312	9.4673	6.51926	5.89785	6.48817	8.4244	9.63278	8.68759	8.35115	8.65463	8.49006	8.11179	8.89443	10.2414	6.33858	8.23233	7.7389	8.66525	8.64925	7.63567	10.0773	8.72686	6.55932	8.7649	8.22153	6.24966	9.75066	7.22287	5.01792	9.36461	7.96724	7.2512	7.50906	8.67407	5.07624	8.33591	8.97728	8.61913	8.9632
FZD10-AS1	0.895351	0.00442867	0.0127489	9.24834	8.35299	9.08669	9.46324	9.83278	9.06238	9.4372	9.46399	8.87239	9.58996	9.63314	8.32683	9.41339	9.2129	9.5131	8.83996	9.29679	9.04397	9.76018	9.52777	9.08082	9.70375	9.97476	9.97081	9.69503	9.845	9.6368	9.08832	9.28586	8.79496	8.44203	9.52897	10.1102	9.68033	10.1198	10.1192	10.1436	10.4074	9.75066	10.048	10.3285	10.3074	10.172	10.2414	7.93118	8.94722
FZD2	0.650173	0.0125327	0.0300921	7.41405	6.76388	7.00401	6.93331	6.55996	6.90309	6.90483	8.15374	6.83158	7.70181	6.48873	7.9614	7.61205	6.61322	6.84166	6.97584	7.06144	8.86122	7.93823	6.61818	7.06723	6.834	7.29947	7.93021	7.62425	6.91959	7.38246	6.70057	8.7552	7.36922	6.66432	6.55164	7.25426	6.62676	6.96708	7.35979	7.4725	6.90483	7.05835	7.7467	7.26724	6.53426	7.81705	8.83778	7.38264	9.77251
G6PC	2.06499	2.44841e-10	4.31917e-09	8.43619	6.3712	8.57621	8.7963	9.17294	8.18804	8.91206	8.98676	8.50153	9.31525	8.98951	7.90157	8.82083	8.94752	9.14523	8.52613	9.08407	8.67734	8.83642	9.11287	8.75738	9.04114	9.09456	8.74383	9.39084	9.23849	9.06636	8.54537	8.9865	8.93104	6.76868	8.81941	8.77134	8.12203	8.81524	8.8849	8.89379	9.30078	8.89443	8.852	8.80549	8.8696	8.9279	8.39861	7.01719	7.94704
G6PC3	1.47017	1.55334e-06	1.23147e-05	9.66112	8.19094	8.93534	9.67773	10.4028	8.1527	9.76668	10.3128	9.45217	9.57923	10.1209	8.8124	10.206	10.3952	10.3598	9.94491	10.1449	9.95814	10.6231	9.88585	9.81184	10.2189	10.6141	10.3693	10.8001	10.4325	10.2708	9.79232	10.0354	9.49055	8.82135	10.6941	10.4774	7.75178	9.94631	10.7505	10.0309	11.0199	9.81582	10.1679	10.4368	10.0513	10.2154	10.3419	8.19016	9.38892
GABBR1	0.768817	0.00408216	0.0119163	8.76556	7.99674	10.9358	8.75285	9.04114	7.58881	9.49541	9.07452	8.31291	8.37954	8.90624	7.46085	8.09138	8.24774	8.2848	8.37582	9.76624	8.91234	8.89151	9.27152	10.0354	9.27483	8.80103	10.0397	8.67407	8.35368	8.50717	7.78637	7.96373	10.1309	7.63259	9.05519	9.27077	8.55148	8.89402	8.61697	8.51894	9.34771	9.64365	9.27035	9.14942	8.2804	8.50696	9.05794	7.77888	8.87977
GABPB1	1.31957	7.39973e-10	1.18645e-08	8.73812	7.41855	9.19944	8.90498	9.01096	8.62021	9.14851	8.80318	8.52613	9.16704	9.48463	8.69195	8.811	9.17122	8.73789	8.19296	8.88039	8.52263	9.22131	9.73538	8.7958	8.82807	9.15866	8.91408	8.81524	9.05707	8.76769	7.94895	8.60286	7.88662	8.52747	8.53492	8.31352	8.33783	9.12733	9.33563	9.39084	9.45987	9.26107	9.02995	9.15532	9.41932	9.97476	9.30733	8.02254	8.4273
GABRA1	1.31283	5.51959e-12	1.3155e-10	5.65536	4.34253	5.14051	5.8286	6.10786	5.48829	5.68114	5.65052	5.46673	5.18243	5.45954	5.34632	6.1116	5.46116	5.63109	5.98284	5.50112	5.36283	5.50636	5.67745	5.35501	5.90816	6.61283	6.25494	5.73244	5.7614	5.82305	5.63557	5.69374	5.6208	3.95937	6.4238	6.67689	5.31315	5.93798	7.03787	5.94956	5.88905	5.7256	5.75962	5.39642	5.5643	6.08106	6.15832	5.59598	5.34483
GABRA6	1.10106	0.000133617	0.00064118	6.20582	5.10476	6.10666	6.16652	6.71307	6.17434	6.04861	6.20372	6.43902	5.8762	6.99813	6.03033	6.06782	6.44195	6.2554	6.42842	6.27001	6.43988	6.55284	7.06861	6.09362	6.61418	6.84444	6.2554	6.01109	6.04997	6.74231	5.97672	5.96292	5.74452	5.57974	6.60719	6.68792	6.66587	7.06846	8.15545	6.86867	6.95926	6.87052	7.21476	6.67758	6.8939	8.01882	7.33042	5.24904	4.97677
GABRB3	0.772479	0.000598954	0.00234058	7.41512	6.64264	7.4825	7.70336	7.95887	6.32766	7.75158	7.68984	7.43125	7.69951	7.75894	6.82153	7.62241	7.65134	7.63391	7.61679	7.78507	7.41293	7.8464	7.82087	7.83737	7.90509	7.97215	7.88002	7.99917	8.09592	8.12408	7.58922	7.87364	7.30003	5.86382	7.96848	8.1108	6.49585	7.7377	8.10361	7.86874	8.25512	7.63884	7.66988	7.59978	7.89823	7.87769	7.66188	6.78583	7.24003
GABRP	0.802321	0.0390485	0.0751665	8.39539	7.59307	8.27996	8.60927	9.3404	6.96575	8.90831	9.15532	10.9202	8.89733	9.00171	7.23521	8.80373	9.17679	8.58757	7.81008	8.76959	8.02431	9.67717	9.22009	8.8003	8.86341	9.21977	9.10192	9.36497	9.57106	8.83064	8.49523	8.55478	8.03081	7.95566	9.00199	8.85083	7.38821	8.71357	9.29716	8.88801	9.51457	8.39002	9.18933	9.16032	9.00109	9.52167	9.25455	6.7299	6.97567
GABRQ	1.21995	3.73088e-09	5.17662e-08	7.42606	6.20611	7.30811	7.75309	7.34009	7.47507	7.65828	7.80176	7.61679	7.63049	7.89444	7.24844	7.23145	7.55825	7.24601	7.04247	7.34623	7.57674	7.96017	7.9278	7.35597	7.66364	8.2114	8.2383	7.34998	7.52868	7.88247	7.25058	7.3213	7.3138	6.74358	7.95096	7.73646	7.722	7.99307	8.23358	7.99326	8.04112	7.53344	7.77724	7.66005	7.45715	8.08316	8.73504	6.37445	6.55389
GAGE1	0.843701	0.0496618	0.0911635	6.61732	5.77362	6.27163	6.01895	6.07147	6.31831	6.1715	6.08271	5.75075	10.7542	6.12823	7.39179	5.87117	6.02018	5.94082	5.67833	5.99371	5.83957	6.23464	6.18908	5.82114	8.72528	6.1682	5.8225	6.02466	5.77794	5.8423	5.76759	7.90095	11.0416	5.67176	5.86012	5.78638	6.24154	6.31964	6.79077	9.89033	6.40361	5.91135	6.57151	6.50744	6.20372	6.60874	6.45098	6.38331	8.01463
GAGE12B	1.30091	0.0172437	0.0389242	6.26536	4.96445	5.20379	5.28392	5.92738	5.59076	5.16759	5.719	5.35864	11.1968	5.71267	7.31137	5.60456	5.23924	5.71051	5.27832	5.18058	5.23729	5.50946	5.28938	5.1912	9.44092	5.92417	5.73697	5.59304	5.48858	5.22209	5.37877	8.15074	11.6667	6.21159	5.59738	5.41761	5.61157	5.91866	6.8067	10.5582	6.00404	5.24983	6.46254	6.34939	5.33624	6.53025	5.78067	5.55626	8.18268
GAGE3	0.971403	0.0127651	0.0305571	8.13271	7.1613	8.01686	7.50854	8.58961	8.29544	8.49633	7.95331	7.17518	11.2861	7.9967	8.48598	7.83241	7.81871	7.99505	7.57481	7.31528	7.40555	8.52028	8.79338	7.64683	9.76571	8.05509	7.78718	8.21126	8.00568	7.8798	7.15188	8.85972	11.1181	4.47888	8.39995	8.01133	7.27622	8.18314	9.3885	10.7931	8.3965	7.14481	8.58737	7.94033	8.80996	9.0466	8.28163	7.37541	7.88368
GAL3ST4	0.886621	0.0236203	0.0502494	10.4925	9.60586	10.1429	10.9323	11.3459	8.82544	10.9081	11.1121	10.4483	10.9779	11.1195	9.70809	10.9498	10.9282	10.9667	10.4393	10.9554	10.6171	11.326	10.9706	10.6249	11.2919	11.3459	10.8985	11.5629	11.3939	11.2708	10.6991	10.6097	9.94199	6.14728	11.2525	11.557	9.02935	10.9243	11.2268	11.1881	11.6805	10.8938	11.5179	11.47	11.3656	11.3216	10.9965	9.14043	10.2936
GALNS	0.609259	0.00401225	0.0117602	9.09847	8.48921	10.1748	9.48816	9.64568	9.82863	9.55771	9.08576	9.02338	9.57678	9.88123	9.28278	9.55957	9.79666	8.99885	8.69455	9.69636	8.84342	9.39167	10.1748	9.29173	9.35291	9.71453	8.9976	9.33071	9.55617	9.04397	8.54434	9.07652	8.83576	7.70395	9.02492	8.65545	9.19448	9.19518	9.3747	9.46438	9.03078	9.64791	9.23165	8.92285	9.61235	10.1034	9.01998	8.16142	8.88631
GALNT3	0.977722	0.000263985	0.00115864	9.48702	8.5093	9.72488	10.373	8.96897	10.344	8.57699	8.57187	10.2047	8.18068	9.89358	10.452	9.40869	9.18378	9.91901	10.1324	9.29792	9.95991	7.48884	8.91151	9.74964	8.90405	8.91059	9.07587	8.21222	8.92471	9.52213	10.2083	8.81718	9.20669	9.70979	10.4361	9.53801	10.4423	9.42154	9.53437	9.08699	7.74926	9.39917	8.69692	9.16063	9.67461	8.66547	8.73056	9.90675	9.70527
GALNT5	0.612564	9.48347e-05	0.000475525	8.01738	7.40482	7.99342	7.83613	7.90492	7.94033	8.34893	7.99983	8.38212	8.0467	7.91705	8.1097	8.1674	8.19016	8.33045	8.35451	8.19767	8.19168	7.75309	8.20685	8.2605	8.11554	7.95654	8.58564	7.91414	7.98067	8.21084	8.42023	8.56579	8.32724	6.53755	8.76692	8.83445	8.00527	8.15762	8.33887	8.12277	8.15672	8.19088	8.2629	7.93097	8.01882	7.86178	8.16632	7.51916	7.84658
GALNT6	1.06134	4.58678e-06	3.23407e-05	7.61626	6.55493	8.69331	6.69637	6.71764	7.85843	7.63277	7.57521	6.48376	7.0483	6.69637	8.41803	7.01038	7.42707	8.07451	7.57885	6.8779	7.91157	6.85919	7.50751	8.07666	7.35561	7.26904	7.10017	7.46595	6.41137	8.41179	8.14943	7.94552	7.89466	7.80642	7.43249	7.35501	6.11243	7.55711	6.97309	7.60638	6.655	7.70241	7.50809	8.63357	6.87985	7.63216	8.08606	7.35826	8.98472
GALP	0.631588	1.33015e-05	8.43276e-05	5.8981	5.26652	6.23045	5.74889	5.88864	6.23811	6.12871	5.54166	5.47204	6.17081	6.13116	5.4077	5.9269	5.97911	5.53365	5.47449	6.00184	5.81304	5.97054	6.40511	5.54607	5.61774	5.7997	5.50918	5.57776	5.62706	5.65913	5.48254	5.64978	5.68978	6.11905	5.88645	5.5674	6.35846	6.403	6.30575	6.24836	5.67802	6.55325	6.44173	6.25079	6.6489	6.54575	6.64591	5.5732	5.64009
GAPDHP73	0.980502	1.06601e-06	8.77669e-06	8.99054	8.01004	9.26964	9.43338	9.99352	9.73728	8.59338	8.99241	9.06673	9.49355	9.55617	8.82493	9.44938	8.85143	9.22844	9.48542	9.54648	9.40825	9.71537	9.38434	9.19546	9.39554	8.79981	8.58361	9.5314	9.29361	9.23092	9.14698	9.18231	8.80266	8.84841	8.9386	8.62975	7.75158	8.98038	9.23696	9.22632	9.03594	8.82745	9.1228	9.2663	8.67734	9.41132	9.05242	9.06817	8.50374
GAS2L3	0.761475	0.0028018	0.00868165	7.34331	6.58184	6.87291	6.66947	6.77937	6.34297	8.04076	7.13725	7.40092	7.8653	6.44823	7.48077	7.27437	6.3467	6.21719	6.9071	6.85135	7.80254	6.97078	7.2669	6.80706	7.13041	6.1405	6.7694	7.37195	6.65827	8.03227	8.43548	8.81993	6.75711	5.74737	7.24913	7.66026	6.87861	7.45228	5.80084	7.37461	6.71588	7.16628	7.78164	8.35248	7.04642	7.46729	7.34786	7.43491	7.85429
GAS5-AS1	0.925747	0.0499878	0.0916516	7.72958	6.80384	7.84236	8.41383	9.00038	6.30351	8.62365	8.41732	7.74062	8.64151	8.54362	6.80953	8.43774	8.42897	8.15568	7.61325	8.42921	7.22512	9.05923	8.56999	7.91915	8.96192	9.14148	8.68783	8.85999	8.6677	8.38078	8.28586	7.91874	7.56072	4.60956	8.35878	8.55869	6.42656	8.56375	9.14292	8.30771	8.98592	8.02479	8.83748	8.79496	8.47707	8.93344	8.96098	5.77538	5.94059
GATAD2B	1.64061	4.59825e-05	0.000252661	10.723	9.08242	10.2398	11.1081	11.5202	9.37802	11.19	11.3395	10.649	10.9419	11.478	9.73407	11.3081	11.4299	11.4161	10.7908	11.3459	11.0154	11.8344	11.2708	10.9706	11.5855	11.9247	11.5011	11.7388	11.4234	11.3375	10.7018	10.8276	10.1997	8.5795	11.6886	11.5062	9.24999	11.3678	11.8929	11.4299	12.1536	11.0921	11.6833	11.8176	11.6214	11.773	11.8724	9.63314	9.90797
GBA3	0.747681	0.000792192	0.00297527	6.04166	5.29398	5.46454	5.83957	5.99767	7.08343	5.63398	5.79945	8.20659	7.67419	6.96311	5.30347	5.94566	6.39996	5.75426	6.65292	5.97965	5.80891	6.15722	5.87519	6.15588	6.86712	5.92785	5.8349	5.66186	5.4132	6.14709	5.71822	6.71179	5.52877	5.82934	6.16481	6.30255	5.78668	6.45593	6.02707	6.73629	6.13862	5.68766	6.00948	5.67147	5.42755	6.82878	5.88837	5.35529	5.12171
GBP5	1.09971	2.52507e-05	0.0001501	7.53436	6.43465	8.93478	8.84976	7.90738	5.46087	7.9559	8.26002	7.27809	7.83071	7.85973	6.74763	7.45228	7.89194	7.24896	7.39414	7.58578	6.44274	7.96272	7.76194	7.61763	8.14817	7.8788	7.49072	7.84425	7.73585	8.06562	6.86409	7.352	8.85536	7.15258	8.19492	8.02872	7.82985	7.84076	7.74204	7.57245	8.24004	7.73074	8.03123	8.14024	8.30315	7.81964	7.94727	5.88503	6.78954
GCDH	0.602836	0.000100075	0.000498089	8.06951	7.46667	7.67396	8.24146	8.24612	7.93275	8.09277	8.07875	7.68248	8.44203	8.05895	7.90857	8.18948	8.15762	8.15863	8.05531	7.83922	7.97806	8.45985	8.26359	7.79254	8.40114	8.44906	8.70688	8.28322	8.34114	8.41732	8.30459	8.42605	8.06723	7.53714	8.40357	8.75738	7.16776	8.07202	8.70659	8.43797	8.38481	7.82609	8.1843	8.04693	8.15116	8.08606	8.98502	7.44758	7.58406
GDF10	0.743492	3.14786e-06	2.31065e-05	5.38479	4.6413	4.98241	5.52407	5.57886	4.98721	5.69319	5.05485	5.51894	5.67449	5.90112	5.55626	6.16267	5.25187	5.13432	5.48762	5.51214	5.61417	5.2163	5.9972	6.23045	6.26451	5.847	5.6161	5.76893	5.69319	5.53476	5.75371	5.35148	5.80988	5.34394	5.90974	5.71689	5.73697	5.42402	5.61531	5.03785	4.69436	5.01956	5.12538	4.51375	4.78173	5.04709	5.60655	5.00994	4.76862
GDF15	0.59241	0.00272574	0.00848735	6.42683	5.83442	5.97672	6.97883	6.19143	5.62816	6.98952	7.18701	5.91582	6.86695	6.66828	5.84546	6.28777	6.20179	6.57636	6.72954	6.98618	5.74108	6.34421	6.06961	5.93749	6.31516	5.80489	5.77273	6.19226	5.82643	6.26393	6.27302	6.13264	5.82371	6.22497	5.8568	5.89946	6.55744	6.01722	7.43288	6.49321	6.26451	5.98641	5.7279	6.10728	6.77206	5.81323	6.02399	6.37836	7.79624
GDPD2	0.598815	0.000174913	0.000808671	8.93196	8.33315	9.23946	8.65829	9.33048	9.2899	8.96638	8.95206	9.15945	8.95031	8.94015	8.72025	9.06268	9.23849	8.84406	8.97231	9.30183	8.75738	8.96838	9.90551	8.96996	8.73555	9.22339	9.32642	8.92254	8.83642	8.88272	8.53416	8.77571	8.92192	8.1356	8.91966	9.08576	9.12097	9.2129	9.46805	9.41771	9.64459	9.23946	9.24173	9.20269	9.21395	9.60328	9.53654	8.66413	8.50966
GEN1	1.12469	1.72051e-05	0.000106479	6.66383	5.53914	7.04228	6.76887	5.71974	5.5726	6.58226	6.7076	6.84768	6.47505	6.79447	6.67836	5.68528	6.79804	6.15374	6.39283	6.22117	7.45678	6.14069	6.40552	6.84274	7.0216	5.4704	6.13564	6.16503	5.98138	6.36907	6.57599	6.84444	6.4805	7.57481	6.69933	6.64089	6.6021	6.69421	5.17739	5.92004	5.43982	7.68625	6.012	5.97744	7.27396	6.54521	6.83015	7.47325	7.65572
GFOD2	0.602562	0.0169951	0.0384616	8.63055	8.02799	8.50897	8.89759	9.41464	8.41406	8.69556	8.81217	8.12022	9.049	9.10952	7.8518	8.80486	8.89266	8.80579	8.2157	8.78067	8.27971	9.2515	9.23092	8.54335	9.01067	9.34256	8.59741	9.08215	9.21937	8.95799	8.36451	8.82212	8.28187	7.45299	8.83093	8.852	8.52771	9.16863	9.715	9.5474	9.81382	9.01405	9.17913	9.21116	9.6111	9.95814	9.20768	7.61187	7.78261
GGCT	0.633472	0.000790045	0.00296818	11.1529	10.5194	11.846	11.0086	11.0402	10.5105	10.9397	11.2377	12.0775	10.5394	10.5674	12.4213	10.6724	11.5129	11.2015	11.7263	11.2898	11.1511	11.1881	11.2694	11.5085	11.1671	10.6991	10.5518	10.6662	10.2004	10.6499	12.0246	10.7898	11.3611	11.0285	10.6983	10.84	11.1763	11.0348	11.4234	10.7612	10.5349	11.4801	9.94137	10.7341	10.9836	10.5259	10.5096	12.0874	11.2694
GGT1	0.778315	0.00673112	0.0180782	8.80658	8.02826	8.23674	9.21937	9.6139	7.46919	9.049	9.1882	8.61493	9.03283	9.17481	7.92819	9.24794	9.10877	9.44596	9.17951	9.16234	9.02773	9.40305	8.99555	8.94347	9.45264	9.96305	9.61184	9.66078	9.41388	9.41893	9.08669	9.06919	8.68002	7.3257	9.47569	9.845	7.38554	9.01435	9.48732	9.05341	9.85849	8.98563	9.19972	9.3441	9.31728	9.36734	9.42832	7.67694	8.16142
GH1	0.754505	0.00751849	0.019812	7.58238	6.82787	8.43548	7.86726	8.17125	8.68159	7.98489	7.92556	6.95789	8.39861	8.28376	7.14244	7.95373	8.33854	7.80136	7.32966	7.90652	7.32741	8.13791	8.4127	7.78595	7.94054	8.11798	7.77527	8.13265	8.11751	7.67638	7.16366	7.54797	7.14824	5.9493	7.70145	7.47233	8.45347	7.90695	8.19103	8.02501	8.27587	7.99235	7.87936	8.17554	8.38579	8.3418	8.02895	6.45751	6.91547
GH2	0.585864	0.0256748	0.0537554	7.50577	6.9199	8.02237	7.83461	8.22176	6.41137	8.0995	8.05737	7.64205	7.89547	7.67396	7.13098	8.16062	8.06505	7.84425	7.73258	7.8522	7.48485	7.98546	8.28399	7.65728	7.97743	7.93021	7.78471	8.0333	7.99707	7.82719	7.59091	7.45754	6.7444	6.56652	8.08045	8.43754	6.28699	7.70611	8.00868	7.71736	8.81391	7.75671	7.66508	8.09394	8.3339	7.9159	7.86161	6.79843	6.20465
GHRHR	1.71705	3.60008e-13	1.07814e-11	7.90239	6.18534	7.95742	8.09017	8.35159	7.3581	8.05462	8.29204	7.78367	8.37974	8.24906	7.61205	8.01036	8.18386	8.21126	7.93459	8.0079	7.71291	8.30932	8.38255	8.03482	8.34542	8.23919	8.1284	8.2795	8.31533	8.26678	7.87816	8.18046	7.71649	7.60133	8.18243	8.10054	7.10524	8.41571	8.30982	8.49523	8.78716	8.46761	8.52169	8.35675	8.72391	8.64517	8.55696	6.56498	7.14023
GID8	0.661537	0.000544151	0.00216112	10.3701	9.70855	10.7267	9.38507	9.56709	9.97267	9.94825	10.0569	10.3353	10.8644	10.6338	11.089	10.5149	10.6327	9.90551	10.7898	10.1124	10.7622	10.5502	10.0749	10.4976	10.835	9.79232	11.1295	9.87766	10.1829	10.0185	10.3396	11.1723	10.8996	11.3894	10.2501	9.85252	10.8938	10.0008	9.2425	9.72671	9.43384	10.4556	10.1068	10.1118	9.78527	9.51861	9.85568	10.7716	10.8183
GINS1	1.58308	2.66594e-10	4.66692e-09	9.17046	7.58737	9.01228	8.70232	8.90218	8.49169	9.08082	9.43796	9.13118	10.0729	9.55059	9.78472	9.68877	9.16392	7.84113	9.05454	8.17247	10.334	9.88358	9.1719	9.18199	9.64934	8.2825	9.35892	9.31377	8.89127	9.37009	8.1843	10.3198	8.82411	8.36879	9.34002	9.49741	7.68248	8.83186	8.40579	9.26587	7.98489	9.02214	8.25266	9.23583	8.1968	9.89311	9.21502	9.30951	9.15402
GINS2	0.604548	0.00129369	0.00452041	7.74564	7.14109	7.57385	7.83419	8.2191	7.44653	8.22153	7.79397	7.62945	7.99983	7.92719	7.32741	7.65457	7.85515	7.70488	7.68226	7.87176	7.88393	8.31089	8.02895	7.73179	8.10741	8.02685	8.27073	8.18178	7.99895	8.13851	7.82049	7.83091	7.43027	6.71604	7.97863	8.00487	6.9519	7.75199	8.23496	7.81531	8.55743	7.56395	7.96373	7.944	7.7155	8.30035	8.32134	6.90309	7.40183
GIPC1	0.849761	1.80882e-08	2.17021e-07	10.0694	9.21961	9.78763	9.7982	10.0588	9.80091	10.1751	9.54167	10.1075	10.1581	10.4184	9.4006	10.0028	10.5771	9.55021	9.76813	10.0999	9.72967	9.82243	10.2708	9.87707	10.3516	10.1163	10.0537	10.0749	10.376	10.2636	10.2725	10.0266	9.80285	9.4734	10.3812	9.33071	10.2358	10.0179	10.1047	10.2881	9.99969	10.216	10.2083	10.0569	10.4899	10.1477	10.3168	10.2921	10.8776
GJA9-MYCBP	0.720057	0.00220643	0.00711029	9.89325	9.17319	9.54836	10.1262	10.5538	9.16798	10.2856	10.1907	9.27596	10.1753	10.2629	9.22911	10.1398	10.0582	10.1815	9.86829	10.0925	9.70899	10.5969	10.0975	10.18	10.2622	10.596	10.3747	10.4556	10.0754	10.5295	9.85042	9.89918	9.55186	8.72391	9.8788	10.5003	8.89613	10.2372	10.7461	10.5727	10.48	10.1316	10.1866	10.546	10.3582	10.6273	10.9008	9.00983	10.0086
GJB1	0.907219	0.000168189	0.000781828	7.59135	6.68413	7.85137	7.00401	6.72194	8.58447	8.02108	8.38754	6.86202	7.06298	6.8939	7.32549	6.98242	8.15698	8.20476	7.59123	7.23858	7.59431	7.34741	7.87856	8.50873	6.9378	7.87317	7.61306	7.19589	6.62127	7.60995	7.91954	6.69147	8.20207	8.9359	7.07175	6.90127	6.68738	7.87077	6.94577	7.29895	7.5137	7.54717	7.63154	8.14261	6.8501	6.41198	6.62676	7.25099	8.19787
GJB3	0.857702	0.00522369	0.0146522	9.05322	8.19552	8.49486	9.04633	9.58387	7.47118	9.39883	9.18563	8.99942	9.13221	9.39554	8.1919	9.17518	9.22671	9.477	9.32839	9.15368	8.9964	9.54648	9.47657	9.0496	9.38479	9.6295	9.9125	9.64135	9.69595	9.40554	9.47454	9.38351	8.99038	7.38041	9.87025	10.2856	7.62877	9.50623	9.88755	9.59212	9.98887	9.1849	9.89033	9.44208	9.67773	9.914	9.8739	8.23438	8.83501
GJD2	1.32052	1.47781e-14	5.84988e-13	8.18379	6.86327	7.90157	8.17264	8.80549	8.15844	7.90475	8.17554	7.98857	7.97308	8.30992	7.82031	7.97176	8.03565	8.36367	8.39718	8.08171	8.22503	8.2705	8.92343	8.02812	8.32073	8.64797	8.76575	8.21205	7.86853	8.28735	8.34492	8.55082	8.6003	7.35279	8.54434	9.16424	7.93715	8.23897	8.80266	8.36054	8.74648	8.45614	8.02895	8.36705	8.6691	8.67759	8.55255	8.04095	7.43645
GJD3	0.616158	0.0291593	0.0595919	8.62681	8.01065	8.56278	8.7446	9.29322	8.12139	8.88779	8.96035	8.48953	8.93286	9.03743	8.03204	8.8067	8.87517	8.96069	8.38618	8.85113	8.3191	9.38281	9.23696	8.46541	9.10473	9.32343	9.10158	9.4142	9.4233	8.98625	8.30507	8.70357	8.18224	6.3885	8.96442	9.3386	8.05441	9.14816	9.57923	9.28046	9.96098	9.03985	9.37084	9.43639	9.30665	9.57415	9.50031	7.52422	7.87679
GKN2	0.69597	0.0317303	0.0637839	7.91443	7.21846	7.62739	7.94099	8.89019	7.5932	7.85805	8.51074	7.42685	7.98957	8.51572	7.45336	8.04238	8.17869	7.98506	7.81221	8.0392	7.73311	8.80206	8.90052	7.65555	8.02026	9.11351	9.05583	8.73083	8.3363	8.9616	8.07875	7.65402	7.65536	7.62894	8.59494	8.57367	7.56801	7.99962	9.04491	9.10028	9.24827	7.98385	8.21957	8.03525	8.12712	9.4734	9.31884	6.67455	6.46776
GLB1L3	0.799199	0.0195793	0.0431657	8.06622	7.26702	8.17285	8.45372	8.93078	7.78282	8.65545	8.5041	8.07495	8.57074	8.66666	7.80486	8.36347	8.59264	8.35094	8.10806	8.46898	8.07143	8.92565	8.87677	8.27971	8.7598	8.7778	8.88723	8.90465	8.78015	8.60984	8.2232	8.34976	7.97114	6.43292	8.67952	8.71972	7.83865	8.56953	8.96788	8.6251	9.12963	8.47635	8.71487	8.79223	8.61387	8.87677	8.77465	6.57111	6.70902
GLDC	2.39506	5.1806e-07	4.57653e-06	8.43966	6.0446	8.76323	11.0876	9.65122	10.0546	6.77372	7.74965	8.21356	10.5232	9.1372	8.72334	9.36393	8.26486	6.12045	6.73926	6.76107	9.42414	7.09913	7.32917	6.24238	9.9207	6.76477	7.66261	9.12213	7.05078	9.74822	7.84096	6.86106	9.91901	11.478	7.64065	6.5957	10.0324	8.87768	8.72611	7.87254	6.95172	9.25536	8.015	7.03575	7.91974	10.1866	10.0174	10.0002	6.67266
GLDN	0.872464	0.0109102	0.0268907	9.59844	8.72598	9.28545	9.99061	10.5087	7.94984	10.104	9.87296	9.19814	10.0664	10.5096	8.77991	9.93004	10.0216	9.73212	9.15205	9.96888	9.45217	10.6644	10.0452	9.68499	10.3498	10.5434	9.86981	10.4616	10.5685	10.0886	9.03232	9.50966	8.85312	7.55641	9.85042	9.95687	8.04576	10.1288	10.6022	10.3034	10.7694	9.97986	10.5222	10.5047	10.5295	11.0056	10.9667	8.56789	9.24324
GLP1R	1.74911	4.52706e-18	3.51116e-16	8.63969	6.89059	8.74728	8.81718	9.00746	8.30636	8.94982	8.70171	8.73925	8.9112	9.14914	8.65361	8.62391	8.83889	8.9161	8.64403	8.68607	8.45893	8.77134	9.27077	8.63798	8.88338	9.10192	8.93188	9.02438	8.97754	9.00461	8.42198	8.60623	8.69251	9.00559	8.76849	9.00559	8.19697	8.81602	9.11824	9.06636	8.65816	8.55452	9.03871	8.49486	8.79146	9.23553	9.10002	8.29662	8.3443
GLRA2	0.644097	0.0107166	0.0264956	6.63732	5.99323	6.48502	6.83613	6.59692	7.68326	6.97627	6.34713	6.56146	6.65465	7.04187	6.52859	6.52497	6.64608	6.31027	6.77244	6.8552	6.52378	6.5067	7.11788	6.91467	6.69272	6.95867	6.73648	6.02172	6.28151	6.50761	6.6178	6.65683	6.2593	11.2343	6.41379	6.45536	7.14991	6.71604	6.72462	6.76241	6.55829	6.93016	6.72194	6.85573	6.73737	7.50004	6.96575	6.13116	6.12655
GLYAT	0.60933	0.0293722	0.0599271	8.17703	7.5677	8.08397	8.45071	9.06754	8.06766	8.53588	8.56078	7.89843	8.42462	8.92285	7.64288	8.4127	8.49926	8.47212	8.24421	8.39385	7.99917	8.98038	8.70864	8.11259	8.54183	9.20981	8.88011	9.04491	8.78373	8.71776	8.29301	8.30011	8.13876	6.50627	8.66692	8.72714	8.10501	8.52818	9.3574	8.63212	9.03808	8.43241	8.53064	8.36214	8.61993	9.18862	8.72858	6.97983	7.16213
GML	0.600312	0.000611051	0.00237932	7.07448	6.47417	6.93153	6.84444	7.34447	7.0483	7.01953	7.02348	7.02008	7.04286	7.14314	6.55722	6.97688	6.69356	7.17246	6.97546	6.90596	6.86767	7.88908	7.10619	6.81325	7.96254	7.38517	7.90095	7.22878	7.10586	6.69837	6.82231	7.33981	6.99018	8.81217	7.78699	7.79066	7.29251	6.94126	7.89127	7.19726	7.11304	6.62006	7.35979	6.85724	7.04412	7.41525	7.93904	6.43028	6.56767
GMNC	2.46318	5.46757e-13	1.58152e-11	8.69166	6.22848	8.59648	8.9791	9.68214	8.39112	9.3574	9.16324	8.5194	8.91234	9.37546	8.56155	9.1092	9.08018	8.99007	8.56717	8.89019	8.69251	9.53183	9.51088	8.7618	9.25455	9.66968	9.01786	9.55429	9.15497	8.98535	8.59741	8.83965	8.69031	7.25177	9.06754	9.17878	8.88607	9.23269	9.9146	9.18453	9.61184	9.1203	9.146	9.26011	9.04204	9.39412	10.0107	7.45774	7.52198
GMNN	0.86546	6.5034e-05	0.000344041	10.3638	9.49831	10.6211	10.4154	10.9584	10.3844	10.9883	10.2975	9.95088	10.8208	10.9706	9.87341	10.6456	10.3135	10.0792	10.2238	10.5183	10.7844	10.9474	10.8705	10.5555	10.4757	10.8067	10.7566	10.6129	10.7341	10.6941	9.95382	10.2559	9.95751	8.62049	10.3835	10.6097	10.0779	10.7991	10.7885	10.8489	10.9896	10.6738	10.8183	10.8812	10.7473	11.2414	11.0639	9.01006	10.0075
GNAO1	0.836823	0.0132338	0.0314096	11.1343	10.2974	10.9599	11.4656	11.8996	10.7042	11.5011	11.4384	10.8914	11.4989	11.8681	10.4265	11.5702	11.5986	11.4384	10.8414	11.5359	11.0019	11.9747	11.7388	11.1532	11.6833	12.0445	11.6154	11.8963	11.8681	11.7002	10.7682	11.1273	10.417	9.8367	11.494	11.5284	10.1014	11.6833	11.9871	11.8783	12.1922	11.769	11.7988	11.9703	11.9908	12.2081	12.237	9.98562	10.6009
GNAQ	0.954846	2.4951e-08	2.91414e-07	10.3334	9.37852	10.0917	10.5609	10.9485	9.97023	10.4211	10.4871	10.6849	10.5003	10.7807	9.9499	10.607	10.5969	10.651	10.1075	10.6917	10.204	10.8579	10.629	10.1021	10.7597	11.0475	10.616	10.9855	11.0416	10.8524	10.4211	10.0694	9.8672	9.32462	10.5276	10.537	9.91141	10.2739	10.56	10.5339	10.8838	10.5711	10.5394	10.6662	10.7405	10.7632	10.6541	9.73019	9.87556
GNGT1	0.737717	0.00017488	0.000808671	5.59666	4.85894	5.28563	5.55519	6.39438	5.47642	6.41357	5.34142	4.6011	5.80489	5.58985	4.67788	5.73075	5.1856	4.6143	4.69198	5.19495	4.94588	5.80489	5.75049	5.39281	5.17822	6.05042	5.52773	5.68766	6.83834	5.75187	6.10439	5.18243	5.04403	5.62965	5.39348	5.52737	6.10514	5.99003	5.59391	5.82546	5.9175	5.85099	5.46425	5.57206	6.39204	6.54925	6.24134	5.19213	5.66451
GNGT2	0.731178	0.0140957	0.033017	8.43274	7.70156	8.56695	8.59452	8.98231	8.21027	8.67283	8.88658	8.54715	8.79421	8.60112	8.21068	8.41446	8.88216	9.05583	8.44279	9.85314	8.2918	8.82948	9.1813	8.66251	8.70659	8.8244	8.99555	8.84285	8.94176	8.74144	8.41524	8.60642	8.20891	6.11133	8.9146	8.91858	8.3029	9.57463	9.74688	8.83748	9.17554	8.75661	9.07137	9.30917	9.28586	9.03836	8.6422	7.4156	7.72337
GNPNAT1	0.915937	2.37543e-07	2.244e-06	9.1518	8.23587	10.0216	8.67806	8.57577	9.52477	9.25759	9.18417	9.25455	9.04337	9.72537	8.98875	9.12629	8.88011	8.51636	8.99668	8.67039	8.93344	9.38253	9.39956	8.98502	9.22039	8.36586	8.6846	9.19174	8.47287	8.91005	8.81466	8.48761	8.67166	9.30882	9.29361	9.10877	9.18417	8.90907	8.94428	9.06851	8.16964	9.60373	8.99462	9.14464	9.43974	8.77248	8.82493	9.71658	9.53227
GOLGA6L1	1.49062	0.000160264	0.000751246	9.11446	7.62384	8.8786	9.61441	10.1727	9.45582	9.92243	9.79324	8.44301	9.97368	9.90904	8.25865	9.73167	9.41251	9.59806	8.90739	9.5591	9.13185	10.3462	10.0336	9.18052	9.74778	10.452	9.12447	9.86381	10.067	9.48596	8.66006	8.89151	8.38754	7.69148	8.93736	9.68796	9.14942	10.0409	10.4281	10.4006	10.6118	10.0254	9.89695	10.2195	10.3182	10.7253	10.2516	7.03083	7.92289
GOLGA7B	1.90711	1.17828e-09	1.80691e-08	9.54105	7.63394	9.3865	9.79987	10.6022	7.73667	10.1653	9.90849	9.41093	9.95238	10.3754	8.2383	9.60737	9.76526	10.2692	9.15629	10.1047	9.81133	10.5325	10.1542	9.43796	10.3082	10.6788	9.84072	10.1466	10.3693	9.94312	8.83064	9.38395	8.53371	8.9632	9.99747	9.50111	8.04436	9.95863	10.4689	9.94881	10.2708	9.75012	10.3893	10.0722	10.1921	10.7649	10.697	8.56514	9.49468
GOT1	0.596416	1.1665e-06	9.55242e-06	8.53475	7.93833	8.2795	8.90739	8.85171	8.87547	8.43057	8.28399	8.10717	9.04491	8.93078	8.18826	8.18611	8.54082	8.20659	8.53326	8.78449	8.13647	9.04337	8.64955	8.10596	8.32771	8.48575	7.78907	8.3552	8.68312	8.82948	8.09515	8.38255	8.33591	8.94048	8.7778	8.19515	8.01241	8.5693	9.14434	8.39002	8.52726	8.30678	8.51572	8.37344	8.70989	8.98707	8.70952	8.84999	8.51799
GOT2	2.89741	1.12127e-17	8.01705e-16	12.4338	9.53638	11.9747	12.6627	12.6234	11.7796	12.5955	12.5646	12.1387	12.6821	12.7861	11.5381	12.6821	12.5867	12.5454	12.0824	12.6445	12.3448	13.1381	12.6821	12.4488	12.807	13.1572	12.9501	12.8837	12.807	12.8342	12.1286	12.1978	11.7796	9.7937	12.9111	12.9946	11.4095	13.1572	13.4103	13.1381	13.5559	13.1157	13.2938	13.4681	13.3611	13.3225	13.4103	11.3915	12.4606
GP1BA	0.931993	0.0181613	0.0405514	8.71225	7.78026	8.11572	9.05794	9.65531	7.13141	9.15431	9.26077	8.45372	9.32606	9.48942	8.11058	9.07227	9.32721	9.15124	8.54044	9.17737	8.47635	9.63416	9.43249	8.6234	9.55534	9.70728	9.20406	9.82302	9.67236	9.33959	8.63473	8.95292	8.48081	7.49337	9.18694	9.34482	7.13914	9.47385	9.73934	9.5314	10.1131	9.19106	9.69289	9.79324	9.8357	9.94881	9.713	7.04301	7.76232
GPATCH3	0.892284	0.000349013	0.00147278	8.80097	7.90868	9.16324	8.88272	8.98038	9.15945	9.22165	8.77855	8.25865	9.16098	9.27667	8.50346	8.82115	9.22368	8.82682	8.30057	9.08379	8.26741	9.27982	9.57354	8.49024	9.06606	9.20792	9.16032	8.92944	9.55475	8.75225	8.46876	8.8046	8.20453	7.99895	8.89326	9.09356	8.47635	9.5487	9.47569	9.39716	9.83069	9.22775	9.24794	9.47011	9.79725	9.90379	9.7517	7.97947	8.30245
GPD2	0.661672	0.00113776	0.00404815	8.24884	7.58717	8.48302	8.49416	7.83241	8.72858	8.13324	8.31089	9.37546	7.26228	8.11218	9.16532	8.03482	8.85113	8.38154	8.33045	7.61461	8.20284	7.44474	7.93097	8.21935	8.17437	7.783	7.70825	7.17152	7.82087	8.1667	8.93252	8.01483	8.73133	9.25712	8.06315	7.67156	8.75492	8.45639	7.44596	8.17742	7.1899	8.28586	7.56578	8.40707	7.88269	7.16681	7.40317	8.88825	8.83038
GPI	0.793697	0.000321693	0.0013732	10.0259	9.23215	9.76889	10.724	10.0694	10.9372	9.67508	9.56594	10.083	9.79033	10.0416	9.845	10.4474	10.1086	9.54208	9.74964	9.57956	9.81932	10.4834	9.44474	9.43939	10.387	9.57224	9.64888	10.4416	9.87927	9.845	9.39412	9.06606	10.172	10.4057	9.65732	8.67141	9.81284	10.1553	10.7597	9.64984	8.51315	9.00369	9.8317	10.3636	10.0022	9.51001	10.1375	11.6041	11.4449
GPIHBP1	1.75538	3.18777e-08	3.62686e-07	7.90595	6.15057	7.67966	8.24774	8.62262	7.30975	8.51032	8.46594	7.63334	8.19467	8.99668	7.52762	8.48781	8.36657	8.29497	8.01441	8.20522	7.82609	8.71487	8.72686	7.87679	8.51411	9.11824	9.02099	8.45852	8.30706	8.43935	8.17125	8.10868	7.71373	6.28597	8.61088	8.35965	6.63322	8.32895	9.04234	8.52097	8.76543	7.97787	8.53655	8.28787	8.36879	8.69195	9.23785	6.8852	6.6281
[truncated: 2,132 more rows]
[truncated: 19 more columns]

## Sheet: down_HGSOC_vs_normal
#log2FC <= -0.585 #p-value cut-off <= 0.05 #q-value cut-off <= 1.00 #Condition pair: down_HGSOC_vs_normal
[truncated: 3,414 more rows]
[truncated: 19 more columns]
