# Supplementary material for: The Expression and Role Analysis of Methylation-Regulated Differentially Expressed Gene UBE2C in Pan-Cancer, Especially for HGSOC
Source: Cancers (Basel). 2022 Jun 25;14(13):3121. doi: 10.3390/cancers14133121 (PMC9264902; doi:10.3390/cancers14133121)
Supplement: Supplementary file 1 [file cancers-14-03121-s001.zip › Table S4. The DEGs in the GSE54388 dataset.xlsx]

## Sheet: up_HGSOC_vs_normal
#log2FC >= 0.585 #p-value cut-off <= 0.05 #q-value cut-off <= 1.00 #Condition pair: up_HGSOC_vs_normal
Group.1	log2FC	p_value	q_value	normal	HGSOC	GSM1314222	GSM1314223	GSM1314224	GSM1314225	GSM1314226	GSM1314227	GSM1314228	GSM1314229	GSM1314230	GSM1314231	GSM1314232	GSM1314233	GSM1314234	GSM1314235	GSM1314236	GSM1314237	GSM1314238	GSM1314239	GSM1314240	GSM1314241	GSM1314242	GSM1314243
AADACP1	0.740734	0.0431548	0.181571	-0.297348	0.443385	-0.284099	-0.412404	-0.178761	-0.244959	-0.497862	-0.166004	2.25907	0.360844	-0.124649	0.0296408	0.661044	-0.345761	0.323843	-0.056652	1.90335	-0.898156	0.00796531	1.01375	0.374539	0.642236	-0.608072	1.55118
AAMP	0.681876	0.000722689	0.0100395	-0.537795	0.144081	-0.567273	-0.610038	-0.85636	-0.848918	-0.286141	-0.0580368	0.267603	-0.701627	-0.313959	-0.170484	-0.156105	-0.310761	0.734448	0.0424469	0.182399	0.430571	0.243249	0.555279	0.442108	0.261655	0.210233	0.58824
ABCA17P	0.618874	0.0450392	0.186572	-0.31319	0.305684	-0.273272	-0.35166	-0.775175	-0.381937	-0.0684097	-0.0286884	-0.708167	1.46721	1.10326	-0.139616	0.0787297	-0.615243	0.577145	1.29919	0.341499	0.663369	0.0756225	1.08959	-0.752016	-0.519333	0.35288	0.576816
ABCB10	0.768807	0.029882	0.141784	-0.434635	0.334172	-0.580505	-0.7475	-0.741774	-0.638979	0.322837	-0.221886	-0.397217	1.22464	-0.867951	-0.698601	0.850033	-0.361853	-1.04858	0.925257	0.82829	0.660606	1.2879	0.882301	-0.316344	0.306046	1.0126	1.05963
ABCE1	0.760753	0.0102761	0.0675039	-0.56471	0.196043	-0.977721	-0.726941	-0.726941	-0.875078	0.165487	-0.247067	0.221439	-0.538396	-0.285599	-0.343333	1.37991	-0.457751	1.40376	-0.0749913	0.608405	0.469167	0.430703	0.33054	0.0864754	-0.644662	0.85078	-0.29975
ABCF1	0.991581	0.000305574	0.00526868	-0.785317	0.206264	-0.976364	-1.01274	-0.990197	-0.811249	-0.773217	-0.148133	-0.0210943	-0.506208	0.333293	-0.0163312	-0.717388	0.00595172	0.661517	-0.463267	0.355708	0.276117	0.284817	-0.304071	1.24379	1.02815	0.323744	0.815504
ABHD11	0.630786	0.000287136	0.00503037	-0.541884	0.0889012	-0.600525	-0.627275	-0.280009	-0.44143	-0.663596	-0.638471	0.136266	0.939427	-0.185939	0.244726	0.405363	0.277734	-0.238307	-0.208954	0.241306	0.0351464	0.193348	0.385493	-0.27503	-0.48915	0.0117206	-0.0507293
ABHD14A-ACY1	0.816004	0.0146085	0.0861003	-0.378605	0.437399	-0.660723	-0.387594	-0.580643	-0.471476	-0.27503	0.103839	1.44225	0.336925	-0.404309	1.34707	0.00733473	0.0651995	-0.259829	-0.156977	0.660097	1.19621	2.00005	1.28281	-0.000708692	-0.275532	-0.0111981	-0.231006
ABHD17C	1.81374	4.20861e-07	3.18851e-05	-1.52128	0.292456	-2.36839	-1.72428	-1.06077	-1.86597	-0.965953	-1.14231	0.968428	0.467013	-0.563852	-0.163337	0.452679	0.726259	-0.0110477	-0.0672815	0.776554	0.630736	0.666249	0.135056	0.0104633	-0.986554	1.17021	0.467727
AC009237.8	1.03823	0.00348457	0.0311677	-0.787284	0.250943	-1.10717	-1.0649	-0.376868	-0.973408	-0.483103	-0.718252	-1.11813	0.602516	0.814364	0.223351	-1.31169	0.823289	0.799123	0.443577	0.492225	-0.0817533	0.0367523	1.30569	-0.800049	0.976259	-0.276775	1.08635
ACAD9	0.64197	0.010241	0.0673125	-0.413087	0.228882	-0.619197	-0.546637	-0.635065	-0.67958	-0.0314371	0.033393	-0.282388	0.419819	-0.241431	0.94975	0.623522	0.77867	-0.286227	0.160705	1.11564	-0.0252993	0.779277	0.365604	-0.791479	0.453701	-0.368893	0.0111439
ACAP2	0.642675	0.0147296	0.0865737	-0.48375	0.158925	-0.122144	-0.78554	-0.650513	-0.794931	-0.194192	-0.35518	-0.640133	-0.266853	-0.540361	1.17103	0.307591	-0.798381	1.20287	0.540587	0.442405	0.0648994	0.226768	0.188097	-0.381491	0.492118	-0.011274	0.544934
ACBD3	0.587315	0.0144115	0.0852908	-0.479266	0.108049	-0.565725	-1.04988	-0.788004	-0.617957	0.139469	0.00650334	0.671974	0.589882	-0.628545	0.32561	-0.585675	-0.330665	0.361447	0.116919	0.798212	0.367099	-0.0583961	0.0415052	-0.0264897	-0.0100533	-0.679943	0.775898
ACN9	1.38963	8.04252e-05	0.0019188	-1.19052	0.199106	-1.46173	-0.996554	-1.06703	-1.32919	-0.96084	-1.32778	-0.948732	0.272716	0.0511072	-0.935557	-1.10176	0.340607	1.36884	0.288226	-0.0767252	0.691818	0.804706	0.605617	1.17804	-0.2019	0.651601	0.197088
ACOT7	0.668293	0.0108776	0.0702873	-0.293911	0.374382	-0.392243	-0.293201	-0.347982	-0.391149	-0.241302	-0.0975882	-0.311583	0.0325645	1.11004	0.521196	0.588977	-0.262045	-0.00133044	0.306962	0.442585	0.75228	1.38991	0.727275	0.0425272	-0.446094	1.42907	-0.332216
ACOT8	0.819545	0.00345134	0.0310281	-0.481958	0.337587	-0.431474	-0.447799	-0.328356	-0.277511	-0.758442	-0.64817	-0.696604	0.697346	0.533537	0.840575	-0.315937	-0.174694	0.961073	-0.0631555	0.873616	1.45346	0.700293	0.712814	0.0178805	-0.245009	0.643634	-0.53744
ACP1	0.689126	0.000876474	0.0115517	-0.520394	0.168732	-0.62765	-0.56083	-0.758618	-0.826813	-0.0602508	-0.2882	0.717029	-0.322825	-0.00362356	0.227758	-0.275734	-0.511943	0.270747	0.0586435	0.657902	0.333819	0.441595	0.245606	-0.603207	0.53281	0.38447	0.546666
ACTL6A	1.43893	1.50398e-05	0.000530807	-1.07691	0.362019	-1.60334	-0.943344	-1.35116	-1.06998	-0.842154	-0.651496	-0.884572	-0.486733	-0.164786	1.23369	-0.0583573	0.255555	1.18546	0.661898	0.785492	1.0081	0.844079	0.0111142	0.575965	0.950205	0.0752029	-0.200007
ACTR3B	0.625056	0.0163019	0.0928755	-0.4827	0.142357	-0.732734	-0.476885	-0.686175	-0.640598	-0.149777	-0.210031	-0.126283	0.8279	0.0114553	-0.603207	-0.228505	-0.693212	0.709453	0.111446	1.30816	0.179728	0.599469	0.620789	-0.77618	0.364284	-0.313354	0.285762
ACTR3C	0.743328	0.00520623	0.0418694	-0.507512	0.235816	-0.784456	-0.940715	-0.041138	-0.602861	-0.428439	-0.247462	-0.106064	1.38129	0.0539272	0.396998	-0.487313	-0.722626	0.130529	0.355525	0.364728	0.299123	0.20155	1.31457	0.677024	-0.233199	-0.323415	0.470411
ADA	0.721441	0.0215066	0.113036	-0.445741	0.2757	-0.387194	-0.695365	-0.469398	-0.54336	-0.121608	-0.457519	-0.1402	-0.169145	0.663159	0.748773	0.441697	-0.568343	0.0875869	-1.03789	0.80926	2.15125	0.575851	0.54394	0.0444716	0.287126	0.543876	-0.570205
ADCK5	0.61633	0.00467172	0.0389111	-0.4126	0.203731	-0.471344	-0.654019	-0.256346	-0.396796	-0.654247	-0.0428452	0.0524342	0.379945	-0.140388	0.224455	0.157863	0.974984	-0.842154	-0.104055	0.362969	0.433356	0.937554	0.270747	0.757043	-0.357967	0.242249	-0.0893446
ADK	0.773036	0.0475787	0.192912	-0.51205	0.260986	-0.277356	-0.509531	-0.731776	-0.929525	-0.156518	-0.467596	-0.298373	0.68167	0.313166	0.384029	-0.0362126	2.65575	-0.90451	0.21542	1.0655	-0.182398	0.376345	0.506366	-0.77731	-1.25932	1.20737	0.228288
ADPRHL2	1.09723	0.000662285	0.0094177	-0.855798	0.241431	-0.868228	-1.16641	-1.56814	-1.30068	-0.215056	-0.0162786	0.734609	0.0437767	-0.113964	0.292037	-0.314413	-0.261711	-0.388631	0.348349	1.53408	0.416203	0.478262	0.598735	0.231233	-0.928707	0.028045	1.16499
ADRA2C	1.08973	0.016908	0.0950972	-0.820251	0.269478	-0.374408	-0.66835	-0.589318	-0.648955	-1.50503	-1.13545	1.33353	0.510877	-0.132056	-1.25337	-1.54721	0.363701	0.230959	1.71305	1.34517	1.41542	1.12937	0.017938	-1.21705	0.212249	-0.918066	1.10712
AF001548.5	0.667426	0.00692227	0.0515565	-0.284277	0.383149	-0.0793809	-0.362652	-0.492255	0.0340534	-0.580007	-0.22542	-0.0661701	0.907314	1.21258	-0.0239483	0.621135	-0.183052	0.0378383	-0.279889	0.115895	1.13814	-0.448892	0.842305	0.884042	-0.031268	0.837923	0.566431
AF279780	1.17636	0.023635	0.1206	-0.330236	0.846121	-0.119508	-0.353743	-0.041494	-0.415984	-0.628322	-0.422363	-0.406126	0.0972547	-0.423904	0.616841	2.39954	-0.480729	1.85787	3.06415	0.724894	0.74463	-0.0810089	0.231546	0.56745	3.16628	-0.336434	1.79568
AFAP1L2	0.841194	0.0364873	0.162522	-0.382649	0.458546	-0.338778	-0.0315575	0.117538	-0.20035	-0.865629	-0.977114	-0.37271	-0.551911	0.276355	2.31348	-0.22707	1.05698	1.34165	0.208932	1.00322	-1.1078	-0.339502	1.18403	1.20589	1.42907	0.300596	-0.384482
AFTPH	0.675539	5.98745e-05	0.00152723	-0.508066	0.167473	-0.501416	-0.621988	-0.669117	-0.602456	-0.332293	-0.321127	0.733575	-0.289	-0.3456	-0.00396143	-0.286016	0.224152	0.246143	0.215588	0.0416346	0.504183	0.062443	0.159565	0.413118	0.353439	0.033746	0.616558
AGMAT	0.605909	0.005047	0.0408397	-0.521695	0.0842138	-0.076223	-0.423206	-0.380085	-0.282572	-0.980202	-0.987881	0.766997	0.234237	0.101742	-0.195749	0.375885	-0.434178	0.225261	-0.474264	0.157513	-0.720699	0.15575	0.30351	-0.342267	-0.0646306	0.472376	0.785938
AGO2	1.002	0.000184758	0.00357636	-0.690426	0.311572	-1.04813	-0.931896	-0.668558	-0.736154	-0.332681	-0.425134	-0.0295831	0.397463	-0.64719	1.00556	0.442905	0.532987	0.0768876	0.0958267	0.17151	0.706469	0.587544	0.180659	1.59245	0.0885688	0.323024	-0.539928
AGPAT2	0.872273	0.000647975	0.00926916	-0.601729	0.270543	-0.613617	-0.707417	-0.845369	-0.956952	-0.467958	-0.0190632	0.0305374	-0.00802595	-0.600525	0.985466	-0.33673	0.67281	0.530723	-0.132987	0.359272	1.19439	0.842305	0.262335	0.758057	-0.268965	0.12308	-0.0830434
AHCY	1.46722	0.000924834	0.0120228	-0.931473	0.53575	-1.55335	-1.02083	-1.5829	-1.38481	-0.0149078	-0.0320412	-0.1661	-0.342036	1.54413	0.732991	-0.0381494	0.104797	0.504367	0.667005	0.573377	3.06415	1.12636	1.01063	-0.0807083	0.0210058	0.500909	-0.650719
AHNAK2	1.11567	0.00372288	0.032711	-0.618137	0.497529	-0.813972	-0.597802	-0.40733	-0.568818	-0.50791	-0.812988	1.0827	-0.120888	-1.07742	0.566947	1.1222	2.62953	0.00774212	1.32974	0.0598154	0.670519	0.191326	-0.169223	1.22786	-0.494046	0.230614	0.703054
AHSA1	0.595862	0.0324489	0.150077	-0.46895	0.126912	-0.719383	-0.63422	-0.922113	-0.771485	0.0724068	0.161094	0.434589	-1.25932	0.0308279	-0.303214	-0.24288	-0.131566	0.814672	0.380404	1.27243	0.656806	0.46613	0.55061	-0.146186	-0.0922594	0.178583	-0.57903
AIF1L	1.38649	6.88439e-06	0.000291694	-1.05492	0.331571	-1.28301	-1.1458	-0.591097	-0.96084	-1.09122	-1.25755	1.14092	-0.0550136	-0.0479656	0.112351	-0.678701	1.05572	1.41967	0.553262	0.288338	0.115968	0.637447	0.183315	-0.131072	0.898419	-0.458935	0.271413
AIFM1	1.23458	0.000268606	0.00477152	-0.907409	0.327167	-0.490066	-1.13545	-1.49146	-1.20789	-0.438811	-0.680775	0.490798	-0.0777987	-0.0275168	-0.91629	0.719879	-0.479498	0.401781	0.353282	1.06622	1.11369	0.950542	1.51547	0.133155	-0.235746	-0.561014	0.787717
AIMP2	0.598494	0.00508851	0.0410526	-0.380436	0.218058	-0.467456	-0.657878	-0.504397	-0.624404	0.0252246	-0.0537051	0.475574	-0.474803	0.138664	0.566642	0.0169278	-0.484094	-0.146812	0.585597	1.0273	0.818047	0.420868	0.55887	-0.0934683	-0.237217	0.308649	0.0081742
AKIRIN1	0.699899	0.0250482	0.125491	-0.273383	0.426516	-0.491227	-0.10503	-0.3243	-0.195817	-0.218344	-0.305582	-0.403932	0.822697	0.646463	0.213568	0.00834776	-0.0302365	0.484232	-0.221638	2.1051	-0.074012	-0.246665	0.228932	0.989461	0.593876	-0.170441	1.87851
AKT1	0.81893	0.0100101	0.0663663	-0.605438	0.213491	-0.349467	-0.721575	-1.10116	-0.922113	-0.506627	-0.0316829	1.04947	0.46851	-0.684068	-0.869594	-1.01164	1.38847	0.747281	0.128278	0.765347	0.507441	-0.0436211	0.312067	0.207089	-0.498534	0.0280149	0.921359
AL833181	1.02799	0.00509183	0.0410649	-0.663622	0.364365	-0.878822	-1.02273	0.00992767	-0.546742	-0.850365	-0.693007	0.046182	-0.392177	0.0688711	0.126784	-0.606391	2.1051	-0.0266789	1.32661	-0.415517	1.37612	0.429718	0.339373	0.0686932	1.45782	-0.706593	0.631913
ALAS1	0.806482	0.00305557	0.0285819	-0.493304	0.313178	-0.432345	-0.78414	-0.592951	-0.600525	-0.365151	-0.184715	-0.125697	0.727275	0.0221479	1.39228	-0.358125	0.53559	0.130099	-0.709226	0.465547	1.09216	0.993003	0.901689	-0.14712	0.401232	0.0836993	-0.393719
ALDH18A1	0.654819	0.00552699	0.0439019	-0.52108	0.133739	-0.893283	-0.575385	-0.726419	-0.835934	-0.0268261	-0.0686326	0.637854	0.422232	-0.269636	-0.569446	-0.455809	-0.713678	0.613582	0.56302	0.746594	0.245312	0.139557	0.257924	-0.323743	0.788364	0.0394769	0.0182207
ALDH3B2	1.08717	0.00651674	0.0493066	-0.557571	0.529596	-0.54966	-0.660944	-0.270119	-0.400712	-0.650242	-0.813746	0.585425	2.64367	-0.358693	0.964608	1.24263	-0.360674	0.285961	-0.358211	0.367944	2.14503	0.387379	0.844079	0.744975	-0.576335	-0.483232	0.398979
ALDOA	0.638622	0.0424618	0.179713	-0.604632	0.0339895	-0.653585	-0.839683	-1.11109	-1.21266	0.0235161	0.165709	0.604966	0.618843	-0.681468	1.0289	-0.477311	0.586791	0.0373066	0.185534	0.626383	0.372151	0.160338	0.506249	-1.43363	-0.943754	-0.235439	-0.412023
ALG10	0.795757	0.0130636	0.0799752	-0.477808	0.317949	-0.675822	-0.685461	-0.653285	-0.427037	0.000231183	-0.425473	-0.446745	-0.421406	0.67215	-0.0430096	0.152979	-0.951478	-0.124018	0.554579	0.721742	0.283751	-0.118777	0.223973	0.697346	1.94007	0.338673	1.60735
ALG3	0.661878	0.0021451	0.0220683	-0.523046	0.138831	-0.956952	-0.576802	-0.223646	-0.501699	-0.52711	-0.35207	-0.854793	-0.40257	-0.289634	0.631691	-0.100161	-0.00491226	0.224291	0.0523908	0.66799	-0.012865	1.02375	0.225597	0.188023	0.436654	0.390171	0.0456799
ALG6	0.721182	0.0208332	0.110698	-0.544877	0.176304	-0.555582	-0.754407	-0.841177	-0.55727	0.0701241	-0.630953	-0.411212	-0.354929	-0.595015	-0.106903	-0.241431	-1.32306	0.100866	0.635899	0.0366553	0.791695	0.445434	0.284589	1.21162	0.696686	0.117635	1.53234
ALKBH2	0.993416	0.00269839	0.0261607	-0.588569	0.404847	-1.09559	-0.449657	-0.596396	-0.70855	-0.475738	-0.205489	1.28381	-0.430689	1.47043	-0.121231	0.0597911	-1.12466	0.480502	0.725196	0.941537	0.781543	0.633309	-0.101502	-0.662747	0.982916	0.859066	0.700293
ALMS1-IT1	0.660485	0.043819	0.183177	-0.2954	0.365085	0.0223191	-0.174237	-0.239834	-0.202691	-0.270866	-0.907091	0.55415	1.05847	2.37949	0.429718	-0.071653	0.595065	0.120715	0.154888	1.49471	-0.615402	-0.374679	0.183377	0.461911	-0.0474902	-0.47003	-0.0118667
ALYREF	1.25374	0.00181487	0.0194767	-1.01824	0.235506	-0.918668	-0.936912	-1.08344	-1.19284	-1.08043	-0.897139	0.148538	0.0554913	0.795022	-0.907614	0.420572	-0.276703	0.11018	-2.11099	0.261122	1.10617	0.279786	-0.211278	1.89787	1.15947	0.435501	0.604966
ANAPC15	0.607402	0.0206056	0.109897	-0.276032	0.33137	-0.360514	-0.171094	-0.227385	-0.389955	-0.334248	-0.172996	0.0540879	0.345799	1.26903	0.284666	-0.192329	-0.422142	0.976259	0.473738	0.77109	1.35167	0.709815	0.525567	-0.111657	-0.36096	0.425223	-0.797939
ANAPC7	0.623986	0.0048494	0.0398116	-0.521152	0.102833	-0.749377	-0.646066	-0.632184	-0.633687	-0.0951293	-0.370472	-0.0545011	-0.192986	0.426331	0.0268473	0.0842041	-0.781138	-0.0231507	0.217973	1.04132	0.504529	0.0720309	0.396342	-0.950414	0.30514	0.166263	0.406542
ANKIB1	0.603581	0.0136675	0.0825098	-0.393712	0.209868	-0.515216	-0.67977	-0.769207	-0.609837	0.309903	-0.0981471	0.351919	1.16667	-0.562871	-0.417378	-0.262327	0.291537	1.21634	0.442786	0.701462	0.34892	0.291482	0.00577156	-0.351022	0.0106171	0.1186	0.00539311
ANKRD45	0.721427	0.0386472	0.168975	-0.355464	0.365963	0.00211942	0.0350857	-0.308931	-0.394877	-1.14398	-0.322203	1.52626	-0.127035	0.853381	0.225597	-0.333297	-0.685034	-0.572517	1.58616	-0.131794	0.0255195	0.80353	1.72413	0.246851	0.869686	-0.673667	0.517642
ANKRD65	1.15924	0.00188981	0.0201392	-0.755845	0.403396	-0.958414	-0.704919	-0.484694	-0.768885	-0.972318	-0.645842	0.807912	0.948674	-0.117198	0.525851	0.816522	-0.347908	1.39114	1.21258	0.603184	0.105503	0.918078	-0.706775	-1.05116	0.0410603	-0.629454	1.93633
ANLN	1.31285	0.00164128	0.018115	-0.818986	0.493867	-0.555781	-1.68744	-0.507079	-1.07327	0.231116	-1.32146	-0.315083	1.96559	-0.0818694	-0.23435	0.0111964	-0.273344	1.68927	0.520111	1.17403	1.46721	0.141829	-0.0647605	1.75994	0.212403	0.611846	-0.682162
ANP32E	0.917515	0.000248562	0.00450285	-0.807509	0.110006	-0.762671	-0.918668	-0.872832	-0.9088	-0.736632	-0.645449	-0.325784	0.0324022	0.599054	-0.843659	-0.338227	-0.341697	1.14804	0.225671	0.206113	0.26138	-0.106339	0.133613	0.3048	0.993003	-0.48418	0.295901
AP000525.9	1.78319	0.00304588	0.0285497	-1.30787	0.475321	-1.23215	-1.3826	-1.29928	-1.2275	-1.2342	-1.47149	-1.13364	-0.0715473	0.373109	0.509535	0.811292	-1.86597	2.00005	-2.03562	2.97456	0.824823	0.00260818	0.712529	0.944327	2.04685	-0.217737	1.72996
AP001347.6	0.820006	0.00397358	0.0343596	-0.534561	0.285445	-0.513556	-0.338907	-0.444189	-0.360147	-1.05116	-0.499408	0.00641383	-0.241636	2.11782	-0.0714907	0.0403959	-0.463722	-0.0319661	0.547922	0.366183	0.631913	0.37907	0.236705	1.16316	0.0765843	-0.219249	0.0290109
AP1M2	0.965261	0.00234713	0.0234918	-0.548801	0.416459	-0.819489	-0.880756	-0.362297	-0.44696	-0.750465	-0.0328409	-0.840014	-0.31754	-0.0954071	-0.29199	-0.452214	0.88373	0.713456	0.235728	0.921028	1.60522	0.848137	0.801828	1.31457	0.80353	0.523243	0.0100465
APOA1	1.33177	0.0174087	0.0969837	-0.871706	0.460059	-1.02273	-1.05595	-0.693212	-0.764013	-1.53746	-0.156878	-0.873813	-0.101803	2.64367	1.13604	0.169808	-1.40184	-1.51602	1.55669	0.439944	0.359899	2.34396	2.353	0.372086	0.0749408	-1.00574	0.810126
APOLD1	0.980638	6.21092e-06	0.000270163	-0.826687	0.15395	-0.76147	-0.968685	-1.26505	-0.89614	-0.602861	-0.465915	0.487493	0.615087	0.185197	-0.165308	-0.503472	0.254926	0.569074	0.463127	0.448239	-0.170081	0.41432	0.0549191	-0.636975	0.295192	0.259983	-0.108513
ARF6	0.601728	0.00578997	0.0455524	-0.451812	0.149916	-0.281182	-0.788214	-0.618818	-0.753734	-0.210925	-0.0580011	0.846405	-0.37926	-0.276247	-0.498704	0.176078	0.986469	0.209667	0.179474	0.618442	0.432758	0.308922	-0.555405	0.474371	-0.0737387	-0.13974	0.0891625
ARG2	0.818604	0.00182245	0.0195404	-0.445776	0.372829	-0.0821136	-0.548604	-0.299245	-0.547628	-0.712884	-0.48418	-0.0320032	0.0660623	1.02568	0.218137	0.112517	-0.152868	0.217662	0.385298	-0.148217	0.118678	-0.251168	1.72996	0.647591	0.867898	-0.0487383	1.20877
ARHGAP11A	0.717847	0.00403386	0.034766	-0.326191	0.391655	-0.202723	-0.280923	-0.213482	-0.336005	-0.226904	-0.697111	-0.0489861	1.2475	0.455972	-0.0118389	0.985036	-0.173968	1.19439	0.463977	0.703556	0.991619	0.555209	-0.592096	-0.087679	0.402608	0.469773	-0.288583
ARHGAP11B	1.23261	9.87699e-05	0.00224731	-1.0342	0.19842	-0.601377	-1.36654	-0.605709	-0.796358	-1.50009	-1.33509	-0.66618	0.118894	0.696976	-1.18415	0.643843	1.20666	1.05016	0.543406	0.00532699	0.462144	0.132017	-0.284343	-0.0502415	0.197544	0.556425	-0.253772
ARHGEF19	0.782235	0.000394336	0.00630497	-0.601356	0.180878	-0.931896	-0.605361	-0.349154	-0.402241	-0.726699	-0.592788	-0.900805	0.491128	1.21715	-0.0255024	-0.0863943	-0.0319095	0.269133	0.58637	0.582811	0.0946401	0.227304	0.181227	0.246199	0.277064	-0.103783	-0.13058
ARL13B	0.992602	0.0286581	0.137867	-0.673751	0.31885	-0.725685	-1.08807	-1.31823	-0.459984	0.215632	-0.66618	1.86896	-0.189608	-0.418483	0.123334	-1.20088	-0.416146	0.486946	2.22686	0.344804	0.0812802	-0.353831	1.65906	-1.39806	0.893087	0.12442	1.26986
ARL4C	1.09061	0.00493505	0.0402599	-0.561917	0.528696	-0.683304	-0.913719	-0.566731	-0.517103	-0.656507	-0.0341407	1.34165	-0.0253302	-0.67958	-0.523132	1.69419	-0.512342	1.06447	0.887374	0.805904	0.630884	-0.054216	-0.0815685	2.20185	1.57388	0.170169	-0.0350529
ARL5B	0.80152	0.00406837	0.0349678	-0.571853	0.229667	-0.822364	-1.17499	-0.753517	0.104303	-0.0900924	-0.694454	-0.153425	0.0846388	-0.107214	-0.535968	0.168366	-0.933921	0.407534	0.642236	0.158809	1.39114	0.0464046	0.220151	0.542182	1.05265	0.0166046	0.674479
ARL6IP1	0.758581	0.00483679	0.0397754	-0.614552	0.144029	-0.907991	-0.679474	-1.20088	-1.16528	0.0777256	0.188586	0.0229681	0.473574	0.128326	-0.565389	-0.0403508	-0.465706	1.28281	0.648081	0.194147	0.551551	-0.172104	0.391177	0.678289	-0.226368	-0.200531	-0.396014
ARMC2-AS1	1.30612	0.000587633	0.00860208	-0.933648	0.37247	-1.10314	-1.04115	-1.90582	-1.42751	-0.118416	-0.00585377	0.321429	1.16397	-0.789706	-0.316344	-0.619016	0.886983	1.25063	0.170574	0.948213	1.20287	0.955197	0.994249	0.00633962	-0.0688913	0.505442	-0.652412
ARNTL2	0.659923	0.0194021	0.105394	-0.260693	0.39923	-0.20371	-0.0286088	-0.192329	-0.204653	-0.274831	-0.660024	1.49701	1.29785	-0.127772	0.518371	-0.182244	0.909637	-0.0831636	-0.48436	0.623522	0.077801	0.271105	-0.0931451	0.60196	-0.131882	1.65348	0.0395119
ARPC1B	0.807951	0.0437021	0.182914	-0.624617	0.183334	0.0351176	-1.1234	-1.2068	-1.21027	0.085125	-0.327467	0.198796	1.32661	-1.57157	-0.269636	-0.0193661	0.928262	0.542582	-1.14977	1.18065	1.05016	0.974529	0.684218	-0.38118	-1.03572	0.737491	-0.262715
ARPC3	0.663736	0.0145124	0.0857005	-0.490977	0.172758	-0.404042	-0.715952	-0.614229	-1.11708	-0.0197423	-0.0748148	1.18236	0.248719	0.0510258	0.26595	-0.25384	-0.470365	-1.07512	0.115722	0.889492	0.644322	0.477034	0.531972	-0.562465	-0.28159	0.560878	0.440038
ARPC5L	1.18772	4.96742e-05	0.00133241	-0.879257	0.308462	-0.841177	-1.13746	-1.00574	-1.13068	-0.622537	-0.537949	1.20666	0.673487	-0.403696	0.595543	-0.489759	0.546449	1.24062	-0.396014	0.280928	0.479394	0.602343	0.371215	0.831087	-0.561307	0.198208	-0.239771
ASAP2	1.3444	0.000248401	0.00450285	-1.0762	0.268201	-1.1518	-1.2712	-1.33334	-1.62821	-0.0768305	-0.995811	1.6374	0.888663	-0.294373	0.357201	-1.40184	1.14965	-0.551286	0.469466	0.645871	0.413905	0.304652	0.469466	-0.377904	0.670799	0.102584	-0.193043
ASCC1	0.622154	0.00106551	0.0132422	-0.525637	0.0965165	-0.385174	-0.479992	-0.479579	-0.645229	-0.70599	-0.457858	-0.152245	-0.156479	0.397639	-0.293266	0.607572	0.433526	-0.956952	-0.16042	0.0468794	0.11799	0.349846	0.56854	0.169756	-0.0813735	0.469014	0.184237
ASF1B	1.16998	0.000100451	0.00227782	-0.91511	0.254871	-0.232897	-1.03696	-0.404239	-0.393801	-1.85858	-1.56419	-0.685916	0.505801	0.999202	0.00971758	-0.239834	-0.0285724	0.0498438	0.0521462	1.09016	0.56854	0.355525	-0.244794	0.640125	0.266938	0.801143	-0.0620874
ASH1L-AS1	1.20269	0.000258207	0.00463355	-0.758249	0.444443	-0.610038	-0.869594	-0.843278	-0.549098	-0.863513	-0.813972	-0.35001	-0.0690688	-0.26402	1.9445	1.08959	0.0507663	0.805731	-0.278834	0.557849	0.406421	0.125867	1.10232	1.09216	-0.591097	0.386598	1.10232
ASL	0.969017	0.00574929	0.0453443	-0.567918	0.401099	-0.414621	-0.781138	-0.354929	-0.454262	-0.705148	-0.697411	-0.372271	0.14386	-0.625732	1.53408	0.319862	0.891908	-1.06015	-0.305757	1.78327	0.510173	0.821328	1.51016	0.5481	-0.192625	0.316312	0.595065
ASPM	1.37599	0.000132446	0.00279623	-1.15313	0.222866	-0.965489	-1.70436	-0.927711	-1.39422	0.0141454	-1.94112	-0.961513	0.872176	0.91771	-0.707024	-0.302132	-0.28747	0.596755	0.608784	0.320898	0.406542	0.0174753	-0.0720605	0.91466	1.37991	0.150851	-0.289694
ASPSCR1	0.77811	0.00624032	0.0479123	-0.431372	0.346738	-0.693933	-0.844089	-0.503603	-0.371041	-0.0702274	-0.105337	-0.231387	-0.288011	0.80926	0.00369207	-0.0263536	0.0178805	-0.229596	0.297851	1.07426	1.95088	0.476234	0.252174	0.866187	0.0629871	0.862842	-0.351093
ASRGL1	2.15065	0.000477873	0.00731842	-1.53831	0.612332	-1.29791	-1.77196	-0.530393	-1.35457	-2.1837	-2.09136	3.24529	0.82187	-0.390341	-0.625514	0.463645	1.63981	0.304039	0.780075	1.99528	0.693509	0.814364	0.225671	-0.319758	-0.352624	-2.06915	2.57115
ASS1	1.89873	0.000357801	0.00590656	-1.41454	0.484182	-2.35209	-1.83121	-2.25673	-1.50503	-0.480333	-0.0618741	0.862842	-0.224129	-0.308146	1.91513	0.183377	1.29358	1.32246	0.435607	0.670674	1.76278	1.35438	0.93575	0.697228	-0.724364	-1.94112	-0.48915
ASUN	1.07603	0.00285379	0.0271722	-0.938135	0.137897	-0.851139	-1.19582	-1.83121	-1.36213	0.0240012	-0.412507	1.18546	-0.293042	-0.414118	-0.00910169	-0.729028	-1.37205	1.12463	0.430571	1.06086	0.280233	0.487158	0.438893	-0.818564	0.335245	0.114807	0.384403
ATAD2	1.5118	1.48677e-05	0.000528094	-1.17917	0.332623	-1.67862	-1.74226	-1.40319	-0.424957	-0.701356	-1.12466	-0.724364	0.640016	-0.374926	0.226964	0.600671	0.733339	0.993766	0.394172	0.679732	0.408877	0.982486	-0.115595	0.162958	-0.249961	1.56436	-0.600525
ATG101	1.26687	0.000202816	0.00382874	-0.903364	0.363503	-0.925238	-1.00148	-0.982478	-0.907614	-0.973917	-0.629454	0.893683	-0.257132	1.11807	-0.44336	-0.423027	-1.13068	0.756455	-0.372597	0.686384	1.03602	0.0868797	0.521697	0.61347	1.18236	0.198072	1.34974
ATIC	0.642286	0.00880384	0.0607638	-0.569305	0.0729811	-0.67958	-0.63326	-1.21705	-0.946143	0.039162	0.021038	0.283277	-0.661509	-0.609297	-0.534637	0.0777621	0.527799	-0.245488	-0.475054	0.308233	0.615479	0.475131	0.288606	0.498197	-0.410175	0.660606	0.368767
ATP5B	0.783857	0.00987175	0.065753	-0.709895	0.0739627	-0.850365	-0.8861	-1.66313	-1.19582	0.112652	0.223399	-0.492526	-0.572868	0.10151	-0.265787	-0.645842	-0.646741	0.715303	0.135056	0.648562	0.792183	0.365604	0.362048	-0.425045	1.13114	0.00199611	-0.0211937
ATP5G1	0.748412	0.0153855	0.0893228	-0.54994	0.198472	-1.13211	-0.509105	-0.760625	-0.80561	-0.124214	0.0320229	-0.0346361	0.134463	-0.171705	1.62477	-0.10865	-0.690605	-0.0186791	0.177524	0.296575	0.978198	1.22648	0.372839	0.0646539	0.00866284	0.487948	-1.1723
ATP5G3	0.760605	0.00957568	0.0645146	-0.56691	0.193695	-0.764354	-0.835934	-1.07071	-0.960019	0.154234	0.0753159	-0.13564	-0.227526	-0.724645	1.37168	-0.102169	0.590148	0.101065	0.297784	0.280028	0.956329	1.12535	0.259289	0.201286	-0.852477	0.130183	-0.171564
ATP5I	0.866633	0.0131964	0.0805801	-0.85629	0.0103433	-1.41633	-1.04171	-1.09965	-1.36951	-0.283842	0.0733051	-0.14835	0.65985	0.875318	0.703054	-1.13467	0.244655	-1.43003	0.498479	0.0888401	0.906903	0.360329	0.389992	-0.304567	-1.03902	0.22113	-0.726419
ATP5J	0.59428	0.0310485	0.145632	-0.556782	0.0374984	-1.04171	-0.683078	-1.23534	-0.999059	0.25132	0.367183	0.16764	-0.0688028	-0.235942	0.457889	-0.661509	-0.103978	-0.902823	0.185046	0.301152	0.735865	0.722553	0.76722	0.0137697	-0.552571	-0.512911	0.287377
ATP6V0B	0.753283	0.0129954	0.0796716	-0.53931	0.213973	-0.507378	-0.985388	-0.869104	-0.833602	-0.13989	0.0994994	-0.565725	0.143754	-0.16197	0.429647	-0.0557041	-0.907991	-0.582719	-0.163689	0.289809	0.441074	0.82187	0.834051	1.48067	0.0449248	0.0786888	1.29687
ATP6V0E2	1.2593	0.00027717	0.00489702	-1.22828	0.0310151	-1.05659	-1.43003	-1.3319	-1.66313	-1.00195	-0.8861	-0.0607773	0.616841	0.813349	-1.12978	-0.770875	0.465314	-0.898558	0.511444	0.690824	0.368406	0.278807	0.461731	-1.5901	0.0423408	0.306102	0.391177
ATP6V1B1	0.930558	0.000801847	0.0108429	-0.443891	0.486666	-0.280295	-0.459735	-0.228319	-0.402919	-0.737544	-0.554535	1.56966	0.520326	-0.15335	-0.0724153	1.33801	0.753591	-0.218747	0.586043	0.844079	1.40714	0.700527	-0.14046	-0.127942	0.486687	-0.0879628	0.381475
ATP8B1	0.812173	0.0301211	0.142585	-0.577237	0.234937	-1.00266	-1.26053	-0.5281	-0.707151	-0.253019	0.288042	1.17403	0.307809	-1.06288	-0.872832	-1.1234	1.12846	0.904487	0.99006	0.221649	1.10879	0.421809	0.604966	-0.700573	0.351648	-0.619016	0.92397
ATPIF1	0.631366	0.044855	0.186135	-0.418525	0.212842	-0.6892	-0.567273	-0.772419	-0.944772	0.134001	0.328515	-0.717163	1.12535	-0.204567	0.623018	-0.679943	0.411642	1.0273	0.626129	0.729483	0.703054	0.506853	1.13459	-0.212006	-0.750233	-0.390539	-0.527506
AUNIP	0.742399	0.00431059	0.0365824	-0.663221	0.0791785	-0.227996	-0.197278	-0.100334	-0.356429	-1.49395	-1.60334	-0.903997	0.681846	0.532464	0.20155	0.101276	0.085926	0.552087	-0.219201	0.564957	0.164129	0.0305374	-0.0360721	0.0374927	-0.138167	0.293744	-0.681716
AURKA	1.53533	2.14388e-08	3.10709e-06	-1.30001	0.235326	-0.675126	-1.54437	-0.78414	-1.52388	-1.76188	-1.51065	-0.145521	0.311157	0.680977	-0.274325	-0.0790817	-0.193791	0.189996	0.15972	0.733339	0.4578	0.414665	0.524076	0.249294	0.487948	0.698615	-0.449657
AURKB	0.635619	0.000485465	0.00741484	-0.329099	0.30652	-0.272581	-0.423414	-0.162073	-0.408568	-0.435703	-0.272256	0.023974	0.794164	1.14029	0.602343	-0.0866634	0.152979	0.485466	-0.0496873	0.121818	0.559593	0.350375	0.313397	-0.0277097	-0.0064054	0.680377	-0.14999
AX747132	1.15028	0.00045464	0.00702375	-0.813574	0.33671	-0.63261	-1.52963	-0.458201	-0.93031	-0.462465	-0.868228	-0.514537	0.354455	1.65655	0.518139	0.0761795	-0.586873	1.07193	1.02939	-0.118169	-0.0546354	0.0667022	0.0987524	-0.518682	1.01172	0.161013	1.13543
AZIN1	1.09226	0.000945407	0.0121573	-0.750547	0.341711	-1.11624	-0.972318	-1.51862	-0.830298	0.00650334	-0.0723095	-0.330263	-0.89571	-0.402139	0.382229	0.310741	-0.178441	0.876074	0.100329	0.550249	1.02939	0.924922	0.698615	1.35303	0.259855	-0.309883	1.09837
B4GALT5	1.17569	0.000141875	0.0029297	-0.740153	0.43554	-0.924687	-0.657168	-1.13364	-1.03642	-0.236899	-0.45211	0.996575	-0.31722	-0.0439408	-0.360846	0.77249	0.0773046	1.14556	0.92445	0.947717	0.635348	0.266204	1.12535	-0.184661	1.23135	0.398423	-0.645449
BABAM1	0.897227	0.00901739	0.061858	-0.620234	0.276993	-0.912682	-0.81497	-1.05737	-0.932249	-0.158113	0.153983	-1.39692	-0.586873	1.30683	0.285042	-0.32186	-0.176936	-0.237891	0.374869	0.615479	1.46943	0.941098	1.01515	0.570961	-0.0139139	0.609092	-0.0216683
BACE2	1.54562	0.00397153	0.0343596	-1.07671	0.468907	-1.5901	-1.20923	-0.842634	-1.59367	-0.156835	-1.06779	2.00005	1.49471	-0.583111	-0.496048	0.879667	0.889826	0.46326	0.821328	-0.163933	2.54737	0.0627714	1.38991	-2.33094	-0.897711	0.754142	0.671217
BAG5	0.743135	0.0112291	0.0718261	-0.498736	0.244399	-0.863873	-0.55045	-0.658451	-0.825458	-0.0509102	-0.0432729	0.808145	-0.201439	-0.171094	-0.556774	-0.426128	0.322837	1.56188	0.756727	0.523243	0.420792	-0.185289	0.235986	0.478262	-0.478959	-0.472632	1.29483
BAIAP2L1	0.985068	0.00170747	0.0186212	-0.551309	0.433759	-1.06915	-0.726419	-0.389133	-0.513163	-0.546637	-0.0633489	-0.198479	1.37329	-0.112389	0.0687296	-0.655563	1.39609	1.39609	0.0507204	0.91236	0.293675	0.54045	0.641697	0.727616	-0.211231	1.09895	-0.381858
BAK1	0.917454	0.000320097	0.00541702	-0.642704	0.274749	-0.148316	-0.552734	-0.363643	-0.595015	-1.11409	-1.08243	0.969208	0.567106	-0.0734009	0.593876	-0.0191487	0.760439	0.780793	-0.783025	0.250056	0.59887	0.605411	-0.562871	0.524076	-0.0439408	0.244795	-0.0162518
BARD1	1.1325	0.000172224	0.00340872	-0.767875	0.364622	-0.557539	-1.06915	-0.549805	-0.713678	-0.897139	-0.819937	-0.0120968	0.59934	0.157863	-0.748061	-0.184214	1.30569	0.840575	1.22648	-0.117318	0.586205	-0.208603	-0.273974	0.921685	0.649511	1.16565	-0.0747816
BAZ1A	0.77152	0.00726521	0.0533295	-0.683278	0.0882424	-0.67728	-1.50272	-0.699765	-0.798381	0.240636	-0.662152	-0.0120526	0.159565	-0.535811	0.00384903	0.148584	0.256497	0.171375	0.54394	1.33353	0.861369	0.294409	-0.000788043	-0.355329	-0.918668	0.315692	-0.85429
BC017398	2.48461	0.000922779	0.0120098	-2.00769	0.476918	-2.54815	-2.38638	-2.45963	-2.12195	-0.531849	-1.99819	-1.25337	1.38991	0.465171	1.43021	2.23525	-2.9562	1.36121	-1.666	2.66683	0.511738	0.0437767	0.818441	-0.196267	2.16538	-1.41633	2.03094
BCAP31	1.00593	0.0105107	0.0685924	-0.773184	0.232742	-0.762454	-1.0342	-1.75285	-1.24793	-0.0534958	0.211827	1.83537	-0.259113	-1.1518	-0.699249	0.145727	0.108388	-0.596396	0.180163	0.367183	0.311415	1.09946	1.54709	0.741853	-0.501983	0.706781	-0.111025
BCL10	0.726336	0.0044556	0.0375347	-0.46845	0.257886	-0.619016	-0.415517	-0.175922	-0.211278	-0.635449	-0.753517	0.127643	0.760729	0.283439	-0.237135	1.54935	-0.3243	-0.0804641	-0.0455178	0.0704441	-0.327923	0.00338213	-0.287315	1.22978	0.479394	0.173229	0.751446
BCL11A	1.73758	5.11264e-05	0.00136157	-1.37116	0.366429	-1.35116	-1.50826	-0.837804	-1.22516	-1.78068	-1.52388	1.0011	0.0157633	0.553542	0.308493	-0.150125	1.03368	-0.0959401	0.899381	-0.112957	1.64412	0.107075	0.4349	0.180834	1.64241	-2.0818	0.482367
BCL2L12	0.596051	0.00306601	0.0286328	-0.432495	0.163556	-0.308843	-0.658712	-0.321553	-0.253772	-0.718252	-0.333838	-0.512791	-0.600929	0.519712	0.299193	0.390171	-0.379641	0.459876	-0.0437328	0.1417	0.456804	0.919912	0.25416	0.225806	0.102749	0.641885	-0.257976
BDH1	0.666753	0.00550003	0.0437706	-0.377966	0.288787	-0.23457	-0.272057	-0.0874652	-0.123075	-0.87457	-0.676058	-0.408207	0.934174	-0.26848	1.25376	0.0172719	-0.269636	0.421893	0.33438	0.17296	0.00196508	0.766751	0.342221	-0.497996	0.869307	0.395645	0.554579
BEND3	0.77444	0.00418847	0.035785	-0.506759	0.26768	-0.949419	-0.553101	-0.543642	-0.404159	-0.381937	-0.208297	0.0829514	-0.468174	0.415106	0.046005	0.820117	-0.523132	0.400359	0.23806	0.663369	0.838211	0.271577	0.0760494	-0.139946	1.89295	-0.0838491	-0.246763
BHLHE41	0.603835	0.00858047	0.0597514	-0.523511	0.0803238	-0.5781	-0.4019	-0.44696	-0.757043	-0.913249	-0.0438166	0.311991	0.647746	-1.24656	0.881847	-0.154067	0.00314912	-0.0551613	0.236255	0.593525	0.222038	0.126503	0.372151	-0.164193	-0.484574	-0.0602138	0.0547392
BICD1	1.49167	0.00115748	0.0140644	-1.07731	0.414361	-1.29183	-1.01164	-0.832091	-1.1078	-1.18849	-1.03198	-0.282309	1.24263	-0.336815	0.972817	0.696393	-2.19663	0.933699	1.08725	1.17103	1.48975	-0.0432232	-0.0416276	0.518721	0.867255	-1.06915	1.62
BID	0.782138	0.0143319	0.0850397	-0.543994	0.238144	-0.527622	-1.04813	-0.547049	-0.715952	-0.0378434	-0.387367	0.512217	0.551551	-0.279466	0.156211	0.552979	0.6787	0.266204	0.244275	0.901689	-0.581639	1.55118	-0.690191	0.10743	-0.505693	1.3576	-1.01274
BIK	0.888835	0.000366776	0.00601134	-0.553101	0.335733	-0.455809	-0.486272	-0.143273	-0.398536	-1.07742	-0.757301	1.24133	0.79119	-0.484094	0.520326	0.756002	0.538016	-0.398252	0.483846	-0.0158392	0.119418	0.788622	-0.126765	0.265637	0.000306422	0.928262	-0.0362748
BIRC5	1.07893	0.000130227	0.00276401	-0.76984	0.309088	-0.400866	-0.833602	-0.468293	-0.454906	-1.14475	-1.31662	-0.0064054	0.358775	1.17804	0.436654	0.269565	-0.220189	-0.137584	-0.564295	0.80353	0.990494	0.584332	-0.261108	0.791695	0.212441	0.951373	-0.441911
BLACAT1	1.0458	0.00466452	0.0388654	-0.61179	0.434009	-0.691444	-0.594165	-0.464781	-0.722373	-1.00266	-0.195318	0.418923	1.2229	1.15795	0.315324	-0.960019	-0.412115	-0.221578	0.0118115	-0.640598	-0.0292351	0.0474557	1.76278	1.68082	1.10402	0.22859	1.25711
BMS1	0.771952	1.82135e-05	0.000615734	-0.630403	0.141549	-0.848455	-0.850808	-0.853057	-0.799774	-0.212872	-0.217453	-0.00352485	-0.362543	0.293415	-0.313749	-0.0965155	0.128992	0.731363	0.318243	0.284817	-0.050143	0.296116	0.350143	-0.0445381	0.513405	0.0794654	0.139838
BOP1	0.750673	0.0026003	0.0254469	-0.48238	0.268293	-0.474264	-0.573936	-0.392859	-0.558598	-0.455339	-0.439282	0.980766	-0.360751	-0.193609	0.0876681	0.472822	-0.482336	-0.749059	0.168954	0.713655	0.864799	1.04248	0.593713	0.520326	0.0380597	0.762538	-0.167345
BORA	0.855788	0.00331998	0.0302239	-0.643181	0.212606	-0.418131	-1.13211	-0.214063	-0.802191	-0.130546	-1.16205	-1.09122	-0.0912913	0.885231	0.561881	0.0926312	-0.381572	0.0805706	-0.600525	0.144829	0.824431	0.525851	0.28685	1.14092	-0.0837425	1.0011	0.105756
BPGM	1.0871	0.0202777	0.108553	-0.502735	0.584369	-0.841508	-0.589318	-0.40301	-1.0342	-0.146865	-0.00150895	-0.433171	3.08443	0.673045	-0.525576	0.0301827	2.95939	0.329264	-0.0606779	0.690552	0.600162	-0.452006	0.0425929	1.16928	0.577346	1.05403	-0.388942
BPHL	0.753334	0.00857921	0.0597514	-0.293943	0.459392	-0.343241	-0.382348	-0.222008	-0.467596	-0.288583	-0.0598808	0.0902331	-0.400712	-0.154568	1.36522	-0.225491	-0.222092	1.42575	0.181318	0.352491	0.362701	0.625861	0.600671	1.58252	0.894884	-0.241711	1.11319
BRCA1	0.617872	0.02094	0.111007	-0.429422	0.18845	-0.118739	-0.762948	-0.18551	-0.530248	-0.4195	-0.559584	-0.288583	-0.93638	0.699151	0.230775	-0.340614	-0.82453	0.26289	0.241544	0.330068	0.640684	0.0537202	0.128588	0.0306555	1.19262	1.30569	0.288927
BRCC3	0.83836	0.00649133	0.0492119	-0.590059	0.248301	-0.62	-1.00838	-0.736379	-0.77707	0.115895	-0.51442	1.68637	0.91164	-0.432472	-0.542639	0.679498	0.16666	-0.898156	0.164412	0.376803	0.245671	0.8279	0.858098	0.0285069	-0.483004	0.617563	-0.234035
BRI3BP	1.00321	0.00119769	0.0143924	-0.908384	0.0948215	-0.777634	-1.10637	-1.12001	-1.12884	-0.605709	-0.71173	0.0343516	0.313557	-0.599074	-0.996554	-0.604042	-1.28301	0.133403	0.625976	1.17196	1.02299	0.217721	0.198619	0.145956	0.520001	0.47419	0.141103
BRIP1	1.00545	0.000222468	0.00414501	-0.743703	0.261743	-0.435511	-1.06364	-0.524639	-0.659687	-0.792191	-0.986554	-0.116696	0.596119	0.664763	-0.584517	0.11731	0.405775	0.350015	0.289404	-0.753517	0.400884	0.208993	-0.33986	1.01464	1.04132	1.08635	-0.193098
BRIX1	1.02355	2.20944e-05	0.000714011	-0.897141	0.12641	-1.39806	-0.946646	-0.907091	-0.699765	-0.398536	-1.03275	0.454889	-0.0335638	-0.0397737	0.31576	-0.245298	-0.830298	0.310228	0.121423	0.0477248	-0.146699	0.459401	-0.239642	1.11004	-0.00815752	0.106899	0.639635
BSPRY	0.966833	0.000457037	0.00704993	-0.7381	0.228733	-0.544122	-0.566271	-0.224775	-0.293411	-1.65161	-1.14841	0.555138	0.43923	-0.262818	0.839174	-0.163035	0.816522	-0.736154	-0.429846	0.213043	0.122508	0.747705	0.462744	0.922889	-0.213878	0.409578	-0.0630756
BST2	1.03025	0.0111994	0.0716852	-0.658069	0.372182	-0.600301	-0.584186	-1.0867	-1.73562	-0.134914	0.193308	-0.126325	-0.373636	-0.876327	1.35438	0.950205	-0.465818	0.993003	0.640125	0.932168	1.43182	0.885752	0.723148	0.0947023	-0.732375	-1.02004	1.54413
BTG3	1.0329	0.00107957	0.0133733	-0.617674	0.415223	-0.905274	-0.719839	-0.719554	-0.558873	-0.0169614	-0.78554	-0.303385	0.83426	0.0370054	-0.122273	1.60522	0.233713	0.578547	0.480878	0.377057	1.09285	0.620463	0.351575	1.73187	-0.799444	-0.25166	0.1769
BUB1B	2.80658	3.509e-09	7.34397e-07	-2.41804	0.388537	-1.98875	-2.90813	-1.56043	-3.42101	-2.13081	-2.49911	-0.0574906	-0.572388	1.34614	-0.627049	0.108705	-0.406126	0.884398	0.293744	1.01849	1.47913	0.82234	0.0069081	0.829063	0.834552	0.411543	-0.155371
BYSL	1.14087	0.00591576	0.0462201	-0.741203	0.399665	-0.77731	-0.631645	-0.486839	-0.738431	-0.948732	-0.864258	-0.516087	-0.627275	3.42291	0.0648265	-0.107975	-0.528509	0.291209	-0.132379	0.200557	0.363383	0.852009	0.118051	0.629032	1.12463	0.846405	0.393851
BZW2	1.53181	9.15544e-05	0.00212666	-1.20182	0.329985	-1.40184	-1.32603	-1.60334	-1.37572	-0.61763	-0.886393	0.901223	-1.15664	1.09777	-0.0961534	-0.683078	-0.55045	1.6374	0.928262	1.57196	0.678927	0.191879	0.0355465	-0.0727006	0.738471	0.0390515	0.018293
C10orf2	0.758149	0.0073984	0.0539542	-0.464304	0.293845	-0.639131	-0.353181	-0.661122	-0.860319	-0.165618	-0.106452	0.908381	-0.774525	1.52495	0.31602	-0.119252	-0.305446	1.08489	0.546063	0.743106	0.509316	0.134512	0.0421868	-0.366475	0.698615	0.302206	-0.543033
C11orf48	0.655865	0.0238885	0.121487	-0.408557	0.247308	-0.6178	-0.620718	-0.437756	-0.629831	-0.0223173	-0.122921	0.5111	0.147743	1.06343	0.321429	-0.26885	-0.969693	0.819174	0.0690322	1.19529	1.07836	0.740522	0.442905	-0.524639	-0.667575	0.437508	-0.438811
C11orf83	1.39436	0.00093674	0.0121157	-0.942504	0.451853	-1.31823	-1.19398	-0.5858	-1.18605	-0.935557	-0.435412	0.457889	0.397823	1.0511	1.0655	-0.296584	-0.607282	0.959525	0.70322	1.62477	1.90335	1.38847	0.558618	-1.09787	-0.92647	0.623719	-0.576129
C12orf5	0.858546	0.0161414	0.0922829	-0.614503	0.244043	0.0590078	-1.22384	-0.590039	-0.341697	-0.223912	-1.36654	-0.483103	0.457344	1.37059	0.398671	0.0531392	-0.354545	-0.465706	-1.26299	0.407534	-0.0333512	0.303794	0.612563	-0.52711	1.44872	1.51222	0.466919
C12orf56	1.53841	0.00741233	0.0540109	-0.77648	0.761931	-0.76177	-0.671892	-0.0392068	-0.590372	-1.47395	-1.12169	-1.2139	1.55118	-0.293937	0.00746558	3.06415	-0.796978	0.696686	1.40481	2.26658	1.56188	-1.4762	1.37168	0.973757	0.768242	-0.0384581	2.34396
C12orf73	1.08747	0.000373155	0.00608105	-0.918695	0.168778	-1.10857	-0.849437	-0.8861	-1.1538	-0.296155	-1.21811	-0.372597	-0.163419	1.1222	-0.357713	0.0886106	-1.26505	0.331913	0.369605	1.37459	0.575965	0.163373	0.365132	-0.438127	0.483251	0.401951	0.0207682
C12orf75	0.966265	0.0357004	0.160445	-0.810635	0.155629	-1.97364	-1.4149	0.0391918	-1.06156	0.25526	-0.708167	-0.186031	0.501397	1.36522	-0.741124	-1.18415	-1.78934	0.782379	0.0131098	0.60419	0.260505	0.466919	0.321225	-0.652412	1.23369	2.04978	-0.555286
C14orf2	0.861596	0.00289261	0.027439	-0.752966	0.10863	-0.965953	-0.876732	-1.18227	-1.41122	-0.15127	0.0696435	-0.511424	-0.203331	0.6141	-0.790234	-0.802977	0.370927	0.839174	0.144293	0.987024	0.686163	0.162103	0.300377	0.479394	0.0535928	-0.465915	-0.125186
C15orf48	2.20215	0.0249484	0.12518	-0.948456	1.25369	-0.393719	-1.13847	0.76285	-1.99819	-0.918066	-2.00514	2.7588	-0.799076	-0.591771	2.17823	2.27894	4.89619	-0.401723	-2.90813	0.199933	2.40924	3.45059	1.4343	2.33457	-1.64912	4.89619	-0.428073
C16orf59	0.741354	9.27507e-05	0.00214357	-0.526067	0.215286	-0.425335	-0.491699	-0.204567	-0.259477	-0.93031	-0.845017	-0.105429	-0.0879628	0.801828	0.0106797	-0.174481	-0.221277	0.605411	0.157055	0.497997	0.463863	0.192465	0.159127	-0.27252	0.329547	0.653381	0.4349
C17orf96	1.00558	0.00308748	0.0287511	-0.72606	0.279525	-0.264313	-0.425134	-0.248488	-0.551286	-1.56043	-1.30671	-0.208691	-0.253521	0.867628	0.784604	0.382063	-0.716243	2.03941	-0.699073	0.497659	0.886603	0.0705797	0.487948	0.237556	0.378978	0.231434	-0.514537
C19orf48	0.594353	0.00603871	0.0467385	-0.364317	0.230036	-0.575973	-0.486478	-0.407234	-0.279262	-0.390845	-0.0461109	-0.595601	-0.560695	0.915951	0.0249289	0.436038	0.0735433	-0.224458	0.541332	0.42347	0.813702	0.802959	0.276853	-0.106023	0.442679	0.616558	-0.20066
C19orf52	0.747289	0.0307135	0.144595	-0.444507	0.302782	-0.870068	-0.35473	-0.577723	-0.946646	0.00448204	0.0776416	-1.28116	-0.767894	0.654493	-0.0986477	-0.329377	-0.0255506	0.097936	0.516052	1.58616	1.21162	1.0696	0.0400374	1.34852	-0.00287091	0.858775	-0.0331828
C1orf106	2.49679	1.95242e-08	2.90074e-06	-2.13323	0.363561	-2.23005	-2.12195	-1.38481	-2.19663	-2.31781	-2.54815	-0.12815	-0.359456	-1.11109	0.583365	-0.662613	0.908742	-0.0925129	0.668677	0.394024	0.597615	0.835056	0.491664	0.0970778	1.83537	1.02621	0.732991
C1orf109	0.969882	0.00130613	0.015286	-0.696659	0.273223	-0.972764	-0.569446	-1.06156	-1.39692	-0.012865	-0.166398	0.0974609	0.186693	-0.187766	0.518721	-0.193791	-0.423027	0.605617	0.547123	1.29483	0.0731238	0.235282	0.38247	1.03368	-0.145828	-0.868228	1.2152
C1orf186	1.90006	0.000157346	0.00317187	-1.63804	0.262016	-1.63538	-1.666	-0.386077	-1.45775	-2.33094	-2.35209	1.43863	0.617563	0.857243	-1.3578	-0.313354	1.56966	0.912605	0.489176	0.552343	-0.124813	-0.158606	-2.11099	0.48493	0.93989	-0.573748	0.969524
C1orf210	0.64978	0.0235461	0.120334	-0.476987	0.172793	-0.570554	-0.800553	0.44131	-0.354003	-0.869104	-0.709018	0.025342	0.160661	-0.25193	0.105335	0.561881	0.133124	-0.0604999	-0.0176551	1.26437	-0.23074	0.469466	-0.764013	1.25711	0.279017	-0.976364	0.809572
C1QBP	1.06624	0.00171707	0.0186634	-0.65945	0.406795	-0.948732	-0.5781	-1.27277	-1.05889	-0.0668558	-0.0313481	-0.580794	0.367771	0.832052	0.981914	-0.789387	-0.0498481	0.92397	-0.0691499	0.61699	0.67281	1.98091	0.646272	-0.211025	0.999202	0.34929	-0.162263
C20orf24	1.18339	5.01952e-05	0.00134324	-0.925087	0.258299	-0.889485	-1.19284	-1.28764	-1.30522	-0.257065	-0.618281	0.0592608	-0.520471	0.305247	-0.690605	-0.0314371	0.0408377	0.648762	0.0564426	0.908381	0.985466	0.996575	0.679894	0.319862	-0.364566	0.867628	-0.128491
C21orf91	0.861298	0.000655277	0.0093471	-0.586391	0.274907	-0.536115	-0.693007	-0.744584	-0.712029	-0.213225	-0.619386	0.521196	0.448744	-0.192381	-0.0418513	1.29483	-0.487791	0.595728	0.380573	0.313067	0.74546	0.30884	0.190447	1.05963	-0.25484	-0.727275	0.244137
C2orf15	0.652785	0.010139	0.0668726	-0.393625	0.25916	-0.371203	-0.525576	-0.377846	-0.302673	-0.168097	-0.616355	0.991619	0.5429	0.00498746	-0.717163	-0.395301	0.0043395	1.01621	0.474785	0.815253	0.673487	0.499692	0.26332	-0.57155	-0.0299628	-0.396397	0.970333
C2orf47	0.82439	0.00176227	0.019049	-0.726847	0.0975437	-1.16014	-0.794931	-1.16205	-1.19691	-0.0399747	-0.00707462	-0.352682	-0.925238	-0.646741	-0.385602	0.37343	0.0944811	0.157917	0.349629	0.947236	0.564369	0.349525	0.507315	-0.102302	0.137111	0.0303389	0.461911
C2orf69	0.702915	0.023035	0.118623	-0.675572	0.0273429	-1.22516	-1.02684	-0.853952	-0.960471	0.0846388	-0.071653	-1.06561	0.290206	-1.00437	-0.659073	0.111446	-0.103783	0.00958269	0.482097	0.766155	0.647357	0.147515	0.590481	0.900579	-1.12645	0.404976	0.0463709
C2orf88	1.7749	0.0234944	0.12015	-0.626619	1.14828	-0.518959	-0.670015	0.232221	-0.369658	-1.11024	-1.32306	2.99065	1.28157	-0.0139139	-0.463574	2.88563	2.21752	-0.943754	-0.499135	2.47864	1.06036	4.14132	-0.873329	2.353	-0.587032	-1.43003	3.77456
C3orf33	0.605978	0.0137335	0.0826681	-0.267029	0.338948	-0.197788	-0.368097	-0.373326	-0.23617	-0.201648	-0.225146	-0.0653538	-0.253653	0.6787	1.58442	0.0482569	-0.515832	0.131317	0.172399	0.49617	0.162412	1.17021	0.600963	-0.212249	0.686782	-0.135402	0.874033
C3orf67	1.23839	0.00412282	0.0353032	-0.646248	0.592146	-0.487453	-0.675339	-0.522167	-0.614377	-0.750233	-0.827917	0.236584	2.06835	1.26986	0.970333	1.2662	-0.667349	1.87279	0.189262	0.549606	2.25025	-0.15145	0.512634	0.948213	-0.599074	-0.374281	-0.86758
C5orf30	1.23004	0.00130504	0.0152811	-0.781784	0.448254	-0.225191	-0.824868	-1.35569	-1.23884	-0.298054	-0.748061	-0.240231	-0.504141	-0.125477	0.811934	-0.675674	1.34165	2.17377	1.40376	0.553104	0.891167	0.846833	0.386924	0.178232	0.795022	-0.715196	0.0503923
C5orf34	1.50708	0.000172762	0.00341574	-0.922527	0.584552	-0.922113	-1.10481	-0.753734	-0.807515	-0.494674	-1.45232	-0.511309	1.70203	-0.45056	0.163373	0.660812	-0.579678	1.18816	1.55458	1.48067	-0.160198	0.492796	0.182863	0.873616	1.18816	1.79292	-0.22542
C6orf132	1.0757	0.0171894	0.0961844	-0.330397	0.745301	-0.658073	-0.335347	-0.231291	-0.473898	-0.274753	-0.00901622	0.667461	-0.384835	2.45558	1.2631	-0.239421	2.18652	2.90982	0.552649	-0.138212	0.223523	0.106899	-0.0320032	0.582461	1.88675	-0.11765	0.00218119
C6orf165	0.740447	0.00934134	0.0633837	-0.498573	0.241874	-0.463837	-0.4246	-0.391149	-0.272759	-0.471163	-0.96793	1.27463	0.785938	-0.117126	-0.240473	0.110912	-0.234086	-1.17499	0.0235702	0.330859	0.457504	0.504367	0.372686	1.18236	0.0409372	-0.470846	1.02375
C7orf55	0.902346	0.00638292	0.0486317	-0.550582	0.351764	-1.07839	-0.504772	-0.95443	-0.713949	-0.181927	0.12998	-0.238125	1.52626	-0.191284	-0.491699	-0.629248	0.630067	-0.175498	0.307202	0.64288	0.955894	1.39731	1.2879	0.402048	0.664966	0.215371	-0.675822
C7orf57	1.31517	0.0204234	0.109205	-0.258059	1.05712	-0.257553	-0.418586	-0.0955813	-0.315628	-0.213424	-0.247582	2.44178	2.66683	1.63209	-0.255707	-0.251168	0.261744	-0.431474	1.04058	3.19964	-0.126765	1.6178	0.137821	3.55598	-0.55338	0.60196	1.37612
C7orf73	0.612331	0.00384852	0.0335316	-0.41938	0.192952	-0.43482	-0.544266	-0.549975	-0.680954	-0.0204804	-0.285784	-0.515292	1.38631	0.284991	-0.563583	-0.247013	0.187013	-0.0651746	0.263731	0.3929	0.297601	0.270345	0.354898	0.571562	0.332573	0.105853	0.0305083
C8orf4	3.51677	0.000809518	0.0109144	-2.45161	1.06515	-2.90813	-2.80576	-0.307388	-2.6473	-2.9562	-3.08491	2.15125	-0.505839	-2.30142	3.45059	1.4517	-2.5762	-0.681983	-2.28616	2.79614	0.228888	0.466705	1.98655	4.38144	4.14132	2.78277	1.55669
C8orf76	1.34472	0.000156546	0.0031641	-0.923605	0.421114	-1.2312	-1.08243	-1.11708	-1.12001	-0.306842	-0.684068	-0.664001	-0.091202	-0.0106379	1.64412	1.55273	-0.414916	0.0971555	-0.101903	0.255093	0.576122	1.42575	0.637264	0.677237	0.0907016	1.28014	-0.215824
C8orf82	1.31788	0.00350855	0.0312531	-0.926947	0.390933	-1.25337	-1.4668	-1.25932	-1.32778	-0.114762	-0.139644	0.347587	0.82551	-0.365673	0.750182	0.0138023	0.154072	-1.73562	0.949243	0.987533	1.29785	2.78277	0.613715	0.32167	-0.0482166	-0.216795	-0.422702
C9orf16	0.695006	0.000678524	0.00957128	-0.377313	0.317692	-0.512639	-0.312956	-0.327697	-0.412404	-0.410175	-0.288011	0.166298	0.93575	0.0389497	0.217015	-0.202649	0.645871	0.104155	-0.315427	0.868411	0.452055	0.582298	0.510752	0.990494	-0.301008	0.503308	-0.113193
CABLES2	0.828766	4.43217e-05	0.00122326	-0.567827	0.260939	-0.609076	-0.65454	-0.522807	-0.439371	-0.706364	-0.474803	-0.0637718	-0.153303	0.440147	0.85371	0.411489	0.00640014	0.0386511	0.696393	0.819489	-0.316494	-0.328678	0.680771	0.145053	0.571397	0.402048	-0.0282738
CACYBP	0.735536	0.000175175	0.0034315	-0.528857	0.20668	-0.531991	-0.469725	-0.754407	-0.987111	-0.22632	-0.203586	0.112795	0.00286505	0.455659	-0.261474	0.102825	-0.455217	-0.00757307	0.186736	0.0929812	0.636382	0.697228	0.765347	-0.221886	0.563517	0.454128	0.182562
CAMTA1	0.63137	0.00383424	0.0334327	-0.308442	0.322928	-0.451516	-0.205298	-0.459984	-0.487674	-0.196424	-0.0497587	-0.719383	0.810826	0.780505	0.25536	-0.254424	0.832757	0.165311	0.805904	0.201609	-0.0110477	0.481286	0.859366	0.279515	0.277668	-0.312067	0.713655
CAPG	1.19068	0.00775176	0.0557759	-0.874358	0.316325	-0.813344	-1.09559	-0.645229	-1.64119	-0.602456	-0.448348	-0.0416916	-0.602456	-1.10116	1.12384	0.739398	1.80724	-1.02426	0.323024	0.304869	0.782663	1.46943	0.537924	1.03489	0.017514	1.40481	-1.71483
CAPN13	0.694208	0.00276795	0.0265884	-0.431511	0.262696	-0.33884	-0.361227	-0.243656	-0.371381	-0.450713	-0.823251	-0.136413	0.649511	0.408413	0.793502	1.14902	0.524668	0.451349	-0.264396	0.039025	-0.274045	0.118439	-0.4976	0.463557	0.589882	-0.561949	0.750182
CAPN9	0.65007	0.00163152	0.0180313	-0.514254	0.135816	-0.153668	-0.480179	-0.10507	-0.437505	-0.939864	-0.969234	0.0745882	-0.357713	-0.022706	-0.0590206	0.770183	-0.348838	-0.198441	0.185252	0.445607	0.184081	0.22233	0.644585	-0.362103	0.478599	-0.244071	0.760729
CAPS	0.826219	0.0136482	0.0824685	-0.430032	0.396187	-0.557948	-0.653833	-0.308843	-0.534113	-0.340452	-0.185006	0.0964266	0.906495	-0.717852	0.296575	-0.369658	-0.427512	-0.298798	0.155669	0.522355	0.746594	0.493178	0.51533	1.27463	1.45947	-0.424042	2.11014
CARD9	0.81359	0.0177212	0.09842	-0.349768	0.463822	-0.182293	-0.511816	-0.28159	-0.386181	-0.288274	-0.448455	2.46683	1.14234	-0.680954	1.00431	-0.087233	0.783445	0.0315178	-0.00277172	0.890905	0.716821	1.11369	-0.0383105	0.103449	-0.853057	0.597038	0.233127
CASC5	0.65287	2.36156e-05	0.000750944	-0.55627	0.0966003	-0.220678	-0.605004	-0.249801	-0.53679	-0.829637	-0.89571	-0.242399	0.231074	0.576512	-0.224896	0.0965373	0.355966	0.144347	-0.00352485	0.235254	0.167186	0.0948336	-0.414118	0.126194	0.182658	0.125049	0.0949303
CBS	1.35783	1.04263e-06	6.51786e-05	-1.12669	0.231135	-0.941266	-1.28418	-0.955999	-1.05737	-1.32443	-1.19691	0.132721	0.338517	-0.685034	-0.0889814	-0.240951	0.774618	-0.0258875	0.495261	1.17966	0.140344	1.14902	0.415286	-0.121182	-0.298175	0.225671	0.30728
CCDC113	1.98476	4.26956e-05	0.00118697	-1.46109	0.523671	-2.25673	-1.09875	-1.54437	-1.8356	-1.95573	-0.0753749	1.59734	0.117671	-0.28048	1.24493	-1.02342	-0.803311	1.22192	1.32572	0.88373	-0.0817051	0.422922	0.701462	0.991996	1.38631	-0.831693	1.50534
CCDC114	0.674385	0.0453172	0.187367	-0.489184	0.185201	-0.936912	-0.969693	-0.0819448	-0.426004	-0.694454	0.1739	0.601533	-0.625895	0.340607	-0.32149	-0.851616	0.41844	-0.921661	1.40877	0.108458	0.295041	1.55669	0.611688	0.68965	-0.858632	-0.158527	0.670154
CCDC12	0.662976	0.00803858	0.0571899	-0.442556	0.22042	-0.563031	-0.534251	-0.96084	-0.740185	-0.0169396	0.159913	0.729784	-0.012451	0.416326	-0.249607	-0.189325	-0.124554	0.776171	0.064731	0.233713	0.993766	0.823289	0.789355	-0.653833	0.500909	-0.00741359	-0.564139
CCDC137	0.806134	0.0115849	0.0733435	-0.388495	0.417639	-0.521089	-0.516674	-0.447959	-0.615402	-0.000859166	-0.228984	0.104303	0.956893	1.58616	0.775522	0.0906334	-0.308002	-0.639131	-0.04179	0.525665	1.6178	0.609732	0.739907	0.997329	-0.232445	0.79119	-0.891539
CCDC146	1.37882	0.0377267	0.165997	-0.43179	0.947031	-0.400059	-0.738996	-0.0393725	-0.233801	-0.394877	-0.783634	2.97456	0.520506	0.124527	-0.545675	-0.226972	2.19193	0.952664	3.00614	0.841493	-0.977114	0.0486046	-0.823621	1.71584	2.39954	-1.06998	4.02006
CCDC167	0.901522	0.000897453	0.0117739	-0.477903	0.423618	-0.326314	-0.356429	-0.554535	-0.49995	-0.650013	-0.480179	0.0780611	-0.054579	0.685736	0.269733	-0.0534958	-0.458774	0.85545	-0.0947454	0.0126693	0.62099	0.79765	-0.0334861	1.33067	1.69713	0.197544	0.927328
CCDC34	0.728551	0.00126574	0.0149665	-0.679804	0.048747	-0.767607	-0.602653	-0.616579	-0.595496	-0.905594	-0.590896	0.00242159	0.0306555	0.286343	-0.110332	0.434036	-1.46173	0.478375	0.0556403	0.525063	0.283895	0.352729	0.132688	-0.358431	-0.352822	0.0552644	0.42616
CCDC47	0.723066	0.00153288	0.0171755	-0.539958	0.183108	-0.478712	-0.826047	-1.22384	-0.791893	0.046182	0.0345614	0.407878	0.564054	-0.428848	-0.0200703	-0.395598	0.173749	0.723451	-0.0798727	0.0703803	0.635563	0.630736	0.299193	0.719587	-0.397128	0.142135	-0.115487
CCDC58	0.794566	0.00547088	0.043621	-0.565346	0.22922	-1.2342	0.381543	-0.149777	-0.776837	-0.747171	-0.865629	0.42545	-0.578409	0.05377	-0.338136	1.27243	0.632732	-0.168149	-0.255758	0.751703	0.25526	1.01464	0.138702	-0.557391	0.409906	0.788622	-0.177851
CCDC59	0.660337	0.00898986	0.0617126	-0.384589	0.275747	-0.815589	-0.710141	-0.538396	-0.40967	0.150074	0.0161861	0.0434214	0.0199561	1.13386	0.244137	-0.0873948	-0.372164	-0.17533	0.973757	1.16667	0.565817	0.238375	-0.063695	-0.435913	0.449001	-0.210973	0.922437
CCDC6	1.34802	0.0115364	0.0731174	-0.904504	0.443519	-1.27277	-1.20485	-1.64586	-1.08107	-0.0593849	-0.163078	-0.1118	-0.335946	-1.1789	2.07341	-0.139644	0.119847	1.76675	0.763388	0.332427	0.492669	0.180987	0.447602	1.39902	-0.718076	-1.25337	3.25794
CCDC77	0.952239	0.0232581	0.119422	-0.516717	0.435522	-0.266452	-0.914318	-0.486158	-0.754407	-0.328285	-0.350685	0.105153	0.162504	1.29588	-0.159832	-0.196039	-1.192	1.00486	0.258907	0.0496213	-0.111259	0.151441	0.42409	2.26658	2.81994	-0.173706	0.262202
CCDC88C	0.617972	0.00165644	0.0182121	-0.431423	0.186549	-0.280741	-0.461901	-0.232897	-0.338487	-0.603528	-0.670986	1.2781	-0.294128	-0.120969	0.0595582	-0.288011	0.0207438	0.689021	0.135437	0.47003	0.229342	-0.212477	0.156016	0.468902	-0.156689	0.106539	0.443365
CCHCR1	0.727992	0.000104052	0.00233469	-0.514189	0.213803	-0.60217	-0.555405	-0.317689	-0.451374	-0.744952	-0.413542	-0.11281	-0.109486	-0.101266	-0.0249467	-0.303076	0.984415	0.295192	0.186196	-0.188498	0.146025	0.651217	0.308024	0.426662	0.38188	0.100528	0.780793
CCL20	1.1038	0.0442373	0.184262	-0.733734	0.37007	-0.209203	-0.639668	0.502679	-0.569158	-1.51342	-1.97364	1.14234	-0.166306	-0.55118	1.14488	0.152375	-1.60738	0.277577	-0.0808912	-0.746446	3.71653	0.682609	0.0480543	0.73513	-1.00382	1.48067	0.696976
CCL28	0.927738	0.00937405	0.0635491	-0.461065	0.466673	-0.365955	-0.506487	-0.294064	-0.359954	-0.560562	-0.679367	-0.147389	2.49842	-0.515832	0.286749	-0.358768	0.462024	0.702148	0.633094	0.160705	0.153718	0.91466	1.7868	0.151029	-0.000903611	-0.503472	1.24379
CCNA1	1.7273	0.0270295	0.132236	-0.872305	0.854993	-0.78773	-0.748717	-0.58468	-0.0100274	-1.49146	-1.61121	0.834552	1.39609	-0.806962	1.79816	0.813984	-1.666	3.88712	0.0270943	-1.20284	0.509535	2.77124	1.52626	4.19157	-0.850808	-1.73562	2.18652
CCNA2	1.52102	8.06169e-07	5.30033e-05	-1.19871	0.322305	-0.827917	-1.37744	-0.87589	-1.29602	-1.14036	-1.67464	0.211368	0.31767	1.22361	-0.376638	0.308101	-0.246829	0.564054	-0.467221	0.4996	1.13114	0.362297	0.105335	0.621326	0.41592	1.00996	-0.522807
CCNB1	2.57634	3.40066e-08	4.57689e-06	-2.1035	0.472841	-1.55108	-2.2209	-2.00514	-2.62191	-1.8356	-2.38638	-0.367625	-0.671507	0.915161	0.898942	-0.445588	-0.869104	1.29358	1.00879	0.523919	1.57196	0.811934	0.82187	0.758611	1.03942	0.805904	-0.530809
CCNB2	0.784741	2.08398e-06	0.000112457	-0.640549	0.144192	-0.325479	-0.942598	-0.28747	-0.735298	-0.675339	-0.87711	0.399988	-0.0541887	0.38806	-0.185605	0.154015	-0.168149	0.0424979	-0.0510513	0.506366	0.268498	0.422083	-0.120393	0.531546	0.0858972	0.0471819	0.0403225
CCND1	1.45446	0.0104679	0.0683713	-0.902721	0.551744	-0.763333	-0.702513	-0.304789	-1.57157	-1.98126	-0.0928631	2.88563	1.42907	1.08635	1.33801	-0.978255	0.921359	-0.0765703	2.09978	1.85396	-1.97364	-0.815589	-0.0471439	0.34993	-0.511517	0.276455	0.99006
CCNE1	0.687385	0.00758708	0.0549496	-0.593243	0.0941418	-0.185123	-0.551037	0.436381	-0.416285	-1.55335	-1.29005	-0.508039	-0.152198	-0.347908	0.641697	0.248281	-0.179856	0.282475	-0.17939	0.559303	0.548574	0.0666563	0.287969	0.452794	0.122599	0.416828	-0.753517
CCNE2	1.25813	2.95075e-06	0.000147731	-1.07626	0.181873	-0.785818	-1.09122	-0.767285	-0.924295	-1.34885	-1.54007	-0.924295	0.359609	0.2544	-0.0243026	0.00633962	1.37713	0.0712729	0.0115368	-0.331207	0.551346	0.143256	0.0446127	0.316694	0.38614	0.52277	0.14467
CCT2	0.922053	0.00127287	0.0150002	-0.723437	0.198616	-1.32778	-0.881942	-1.04988	-0.914963	0.0859999	-0.252055	-0.363567	-0.090948	0.798212	-0.422363	-0.276485	-0.580007	0.562485	0.536789	0.59584	0.578547	0.399692	0.271496	-0.0220621	1.50534	-0.109308	-0.2058
CCT3	1.0587	0.000385431	0.00622556	-0.949894	0.108808	-1.30353	-1.14231	-1.70436	-1.43859	-0.152755	0.0421868	-0.0147291	-0.693007	0.0169004	0.539705	-0.335538	-0.803788	0.830297	0.207089	0.252006	0.461389	0.555871	0.579499	-0.385174	0.659613	-0.116275	-0.0129341
CCT5	1.12945	0.000108387	0.00240767	-0.837504	0.291942	-0.838768	-0.610798	-1.50009	-0.823251	-0.54872	-0.703398	0.210704	-0.00754756	-0.354003	-0.483469	0.545272	-0.86621	0.329987	0.515606	-0.0254501	0.610052	0.422159	0.749378	1.53234	0.88373	0.114225	0.494295
CCT6A	0.852322	0.00312299	0.0289573	-0.630943	0.22138	-0.968685	-0.687064	-1.20197	-1.04352	0.0881031	0.0274725	0.3746	-0.415744	-0.0425551	0.704211	-0.46408	-0.502164	1.29172	0.400211	0.85233	0.823289	0.67281	0.518583	-0.113782	0.191173	-0.43856	-0.309965
CCT7	0.713483	0.00666476	0.0501281	-0.623784	0.0896988	-0.776837	-0.740185	-1.30816	-0.899344	-0.149445	0.13127	0.0526687	-0.579574	0.120116	-0.414025	-0.61057	-0.0773583	0.12953	0.142922	0.560769	0.61208	0.887374	0.493551	0.467158	0.697686	-0.16785	-0.879297
CD24	4.35026	1.44226e-10	6.15818e-08	-4.07014	0.280122	-4.6114	-3.93959	-2.03562	-4.6114	-4.6114	-4.6114	0.344875	0.630067	-0.201553	-0.631312	1.14556	0.721504	0.186542	-0.184124	0.711366	0.55887	0.424857	0.0282228	1.15947	1.87539	-1.2342	-1.05358
CD47	0.767398	0.00228021	0.0230715	-0.55745	0.209948	-0.767285	-1.00266	-0.639668	-0.731536	-0.0358491	-0.167702	0.705465	-0.377993	-0.401801	0.164054	-0.588163	0.839174	0.504529	0.442905	0.213792	0.125867	0.289717	0.0855004	0.189389	0.45693	-0.57176	1.28157
CD82	0.817711	0.00469915	0.0390128	-0.566564	0.251147	-0.460151	-0.865629	-0.562871	-0.547926	-0.215304	-0.7475	0.659081	1.19439	-0.807515	0.65985	-0.46623	0.64333	0.208372	-0.532371	0.477034	0.591244	0.552649	0.2908	-0.392243	-0.6928	0.358135	1.27463
CD97	1.04346	0.0238628	0.12141	-0.419033	0.62443	-0.0653821	-0.71884	-0.60847	-1.04619	0.0386511	-0.113964	0.780793	-0.489759	-0.310678	0.603424	-0.182791	0.00642753	-0.974547	0.276355	1.70026	3.25794	1.79816	1.17103	0.536148	-0.384651	1.40714	0.795623
CDC123	0.71388	0.00252049	0.0247931	-0.521348	0.192532	-0.384311	-0.576129	-0.862829	-0.835525	-0.0863943	-0.382897	0.480878	-0.981957	-0.239261	-0.0333757	-0.183259	-0.376868	0.117183	0.0161046	0.421316	0.83426	0.704397	0.366254	0.590644	0.550143	-0.0101347	0.824194
CDC20	2.08109	2.98054e-05	0.000886797	-1.69459	0.3865	-2.14018	-2.48397	-0.879862	-2.16936	-1.13635	-1.3578	-1.24164	0.268929	0.832757	1.13814	-0.176936	-1.09039	0.236064	0.160024	2.716	1.06166	1.12153	0.345155	0.849462	-0.307388	0.558296	-0.287659
CDC23	0.65285	0.00483915	0.0397754	-0.540066	0.112784	-0.391743	-0.413905	-0.88236	-0.620188	-0.355678	-0.576522	-0.295976	-0.876732	0.0768452	0.253382	-0.789968	0.510752	0.593525	0.591113	0.599618	0.443738	0.514776	0.663159	-0.15541	-0.216112	0.290088	-0.398252
CDC25A	0.637451	0.00011545	0.00252293	-0.519511	0.11794	-0.452431	-0.532371	-0.23588	-0.516674	-0.866919	-0.512791	0.0936138	0.469557	0.357284	-0.393531	-0.308465	0.0115368	0.423362	-0.1182	0.177697	0.344306	0.135409	0.0522788	0.127421	0.45393	0.488039	-0.427194
CDC45	1.2227	0.000566115	0.00837821	-0.717641	0.505063	-0.200795	-0.33993	-0.427512	-0.564295	-1.42446	-1.34885	-0.0906814	0.0451906	1.17103	0.2931	1.91885	-0.0800062	0.602889	-0.489514	0.335971	0.769856	0.839749	-0.445701	1.54413	0.805731	1.10617	-0.245751
CDC6	1.4232	0.000137083	0.00286434	-1.01912	0.404076	-0.783634	-1.17306	-0.976364	-0.707661	-1.28116	-1.19284	-0.581208	-0.504914	0.860548	0.360065	0.754951	-0.823621	0.393851	-0.0540731	0.723451	0.697686	0.589882	-0.112677	0.562713	1.11175	2.43096	0.055844
CDC7	2.30719	2.56322e-06	0.000133287	-1.93771	0.369482	-1.65964	-2.09136	-2.5762	-1.78068	-1.18744	-2.33094	-1.14752	0.678289	1.59576	-1.09122	-0.0454933	-0.489759	1.5389	0.991008	-0.42938	0.734095	0.0220123	0.0043395	1.01515	1.73496	0.741853	0.0587069
CDCA2	0.830885	0.000653644	0.00933544	-0.59542	0.235465	-0.144378	-0.446521	-0.0447377	-0.275855	-1.27843	-1.3826	0.203475	0.188631	0.642236	-0.359827	-0.00899099	0.181866	0.608627	0.14488	-0.433264	0.00904137	0.414876	-0.253292	0.636509	0.985956	0.669035	0.137681
CDCA3	1.43516	3.36025e-06	0.000163233	-1.10809	0.327068	-0.736632	-1.02947	-0.573597	-0.848174	-1.54721	-1.91347	-0.129616	0.814364	1.42907	-0.0284822	-0.0432232	-0.245075	-0.599553	0.0673569	0.814672	0.626623	0.447265	0.49366	0.534472	0.453305	0.688396	-0.0901547
CDCA4	0.670584	0.0023269	0.0233301	-0.370317	0.300267	-0.319234	-0.205395	-0.127221	-0.339146	-0.722867	-0.508039	-0.0652422	0.551753	0.491292	-0.421317	0.522098	0.792943	0.414504	0.512911	1.20737	0.480614	-0.203655	-0.384835	0.694337	0.0479961	0.473182	-0.309682
CDCA5	1.35641	1.76052e-05	0.000600308	-0.978826	0.377587	-0.901162	-0.810331	-0.500768	-0.58859	-1.482	-1.5901	0.114603	0.0821786	1.04455	0.585065	-0.348702	-0.246578	1.20984	-0.0450244	0.63424	1.08725	0.446897	0.344233	-0.35709	0.550954	1.29358	-0.354601
CDCA7	1.31196	6.17589e-06	0.000269283	-1.01418	0.297776	-0.664637	-1.18227	-0.370386	-0.953722	-1.38734	-1.52674	-0.0479324	-0.541675	0.0184635	-0.117126	0.452134	1.02494	0.805468	0.668921	0.546808	-0.381099	0.295824	-0.376959	0.250619	0.725835	1.06622	0.37397
CDCA8	1.54362	1.33495e-07	1.29973e-05	-1.23801	0.305609	-0.988815	-1.47846	-1.01351	-1.22984	-1.38059	-1.33685	-0.411049	0.329416	0.355072	-0.173483	-0.110733	-0.375272	0.343516	-0.0100274	1.59076	0.550037	0.426767	-0.00512324	0.797852	0.3746	0.541474	0.665943
CDH5	0.693889	0.0477862	0.193445	-0.269598	0.42429	-0.142949	-0.158302	0.0658541	-0.319037	-0.61238	-0.450775	0.723451	-0.61057	-0.23856	-0.936014	0.343765	0.791457	-0.510363	0.682803	0.140344	1.08055	1.54709	1.25926	-0.044037	0.41721	2.15125	-0.00899099
CDH6	1.41222	0.00212793	0.0219114	-0.971125	0.441093	-1.06779	-1.00513	-0.442581	-0.769915	-1.0796	-1.46173	1.24062	-0.311957	-0.174893	0.77867	0.216446	-0.333354	0.271342	1.99042	0.157629	-0.685034	-1.91347	1.17295	1.43721	1.79292	0.189389	1.2286
CDK1	1.79656	0.000128298	0.00274087	-1.44662	0.349945	-0.868666	-1.53504	-0.607076	-1.62466	-1.91347	-2.13081	-0.593954	-0.102169	0.375422	-0.465266	-0.115138	-0.27438	0.437005	0.0191979	0.282014	0.468412	0.33874	0.142474	0.510997	0.433839	0.545599	3.59632
CDK16	0.720006	0.00751401	0.0545606	-0.441132	0.278873	-0.633526	-0.471726	-0.325479	-0.412115	-0.504914	-0.299034	0.300377	0.945561	-0.0140249	0.789849	0.292769	0.179984	-0.999658	0.108666	0.971953	0.853119	0.609261	1.28157	-0.0849682	-0.553962	0.146242	-0.364764
CDK2AP1	1.1036	0.000338975	0.00568603	-0.975408	0.128188	-1.43003	-1.11897	-1.74226	-1.53746	-0.0362417	0.0125145	0.200905	0.416326	0.247692	0.0638537	-0.362543	-0.413007	0.747482	0.260394	1.06766	0.39423	0.558296	-0.071115	-1.00909	0.0169521	0.00497048	-0.0719965
CDK5	0.600282	0.0454633	0.187665	-0.31558	0.284702	-0.453787	-0.408062	-0.310761	-0.441207	0.0888401	-0.368504	-0.409108	0.561008	1.43721	-0.541493	-0.123708	0.612744	-0.63623	-0.997164	0.720865	0.822697	0.934671	0.507738	-0.0162786	-0.0416916	1.29687	0.427112
CDKN2A	1.07216	0.041869	0.178126	-0.261758	0.810402	-0.200232	-0.390617	0.806178	-0.368097	-0.644823	-0.772956	-0.0815685	2.04685	-0.834033	2.13079	-0.416394	2.29785	0.0270531	0.913135	1.73187	1.30142	2.68144	0.903692	1.94729	-0.811249	-0.294373	-0.577336
CDKN3	1.55375	5.84565e-05	0.00150364	-1.30161	0.252141	-1.04988	-1.44278	-0.61406	-1.65161	-1.39169	-1.65964	-0.564639	0.40821	0.898419	-0.0534641	0.637264	0.77109	-0.682162	0.499938	0.307667	1.38275	0.871788	0.539856	-0.0293976	-0.87589	1.19262	-1.26979
CDYL	0.838914	0.00312963	0.028992	-0.481066	0.357848	-0.471094	-0.498395	-0.384053	-0.69197	-0.442844	-0.398039	-0.204746	-0.710141	0.387482	0.684477	0.399071	-0.139416	1.54281	0.0706414	0.403356	0.131528	0.579124	0.0546646	1.66773	0.888663	-0.411562	0.38188
CEBPG	1.37274	0.00403425	0.034766	-0.987613	0.385132	-0.564639	-1.33334	-1.14398	-1.14658	-0.722067	-1.01508	-0.951975	-0.908461	0.162553	-0.0905898	-0.132379	0.524296	-0.0287775	1.11244	0.101947	3.63341	0.57426	0.298303	1.10493	-0.572075	1.25063	0.0835996
CEBPZ	0.820122	0.0303929	0.143527	-0.70907	0.111052	-0.825733	-1.56814	-1.53746	-0.727612	0.340447	0.0640736	0.604779	-1.795	-0.192858	-0.31845	-1.04748	-0.106482	0.424965	0.654005	1.38129	0.914296	0.595194	-0.159902	-0.342116	0.723451	0.0580701	0.383066
CEBPZOS	0.616621	0.00187674	0.0200185	-0.290649	0.325972	-0.209507	-0.249856	-0.546931	-0.455708	-0.101068	-0.180826	0.515061	-0.45125	-0.233801	0.649885	0.53891	-0.219201	0.1738	0.282876	1.31302	0.431	0.297343	0.421439	0.376259	0.443852	0.022235	0.654121
CELSR2	0.716861	0.00111017	0.0136352	-0.545024	0.171838	-0.517933	-0.794636	-0.59156	-0.610038	-0.562465	-0.19351	0.259289	-0.214399	-0.305847	-0.0208068	0.222747	0.914296	0.983834	0.312493	0.241818	0.195999	-0.892841	0.25079	0.541772	-0.0692884	-0.161164	0.490709
CEMIP	0.716717	0.0483289	0.194849	-0.251923	0.464795	-0.345543	-0.426242	-0.124667	-0.200948	0.329846	-0.743982	-0.271032	-0.280741	-0.140935	2.19193	1.90335	0.503176	1.20737	0.729204	0.446428	0.120116	-0.216112	-0.0738533	-0.14035	0.933004	-0.77707	1.30223
CENPA	1.46495	1.84191e-06	0.000103291	-1.20411	0.260845	-0.953722	-1.27416	-0.615622	-1.35945	-1.35569	-1.666	0.237793	-0.134141	0.974529	-0.0200973	-0.190108	-0.295021	0.464691	0.0384584	0.569412	0.922889	0.208834	0.138385	-0.107252	0.82551	1.26986	-0.730216
CENPE	1.17803	0.000244419	0.00444893	-0.989659	0.188368	-0.494794	-0.789706	-0.606753	-0.554089	-1.56814	-1.92447	-0.559584	0.288087	1.31302	-0.0472594	0.517991	-0.211919	0.0265285	-0.576129	0.239334	1.1749	0.244072	0.205909	0.965782	0.0798835	0.0894234	-0.736154
CENPF	1.604	6.54399e-06	0.000280913	-1.32778	0.276217	-1.10176	-1.35945	-1.00976	-1.13364	-1.6378	-1.72428	-0.233583	0.772817	0.991996	-1.15664	-0.131716	-0.701931	0.835984	0.621326	0.411356	0.833294	0.0704831	0.199184	0.597038	1.38382	0.370111	-0.44406
CENPH	1.15263	0.000179647	0.00349518	-0.959233	0.193392	-0.374605	-0.420651	-0.936912	-1.24656	-1.3635	-1.41317	0.778967	-0.55338	0.5838	-0.632184	-0.0601699	-0.982938	0.0889088	0.0328132	0.313469	0.151269	1.23135	0.716821	0.85409	0.546174	0.191211	-0.165922
CENPK	2.84744	2.32637e-08	3.26549e-06	-2.39368	0.45376	-1.45498	-2.86834	-2.90813	-2.69221	-2.16936	-2.26904	-0.888073	-0.589318	0.928262	-1.1078	-0.152841	0.0419569	0.758804	1.37168	1.38275	0.876743	0.915497	0.588513	0.854982	0.91347	1.42575	-0.0602138
CENPL	0.992147	2.0718e-07	1.81619e-05	-0.861889	0.130258	-0.685276	-0.735878	-0.671892	-0.888073	-1.10857	-1.08164	-0.575585	0.148711	0.217721	0.0213041	0.184237	-0.3663	-0.0314615	0.390171	0.106077	0.553104	0.289442	0.461911	-0.0394707	0.462744	0.289442	-0.027915
CENPM	1.01039	0.00171021	0.0186332	-0.598374	0.412012	-0.631645	-0.585068	-0.324626	-0.562465	-0.82453	-0.661912	0.646272	0.0460697	1.40714	-0.161748	0.140515	-0.617325	-0.0367163	0.124156	-0.0441968	1.6374	0.874851	0.405775	0.987024	0.17654	1.59734	-0.590896
CENPN	0.77357	0.000518491	0.00782009	-0.478985	0.294585	-0.25816	-0.447869	-0.163461	-0.478326	-0.804518	-0.721575	-0.167033	0.42409	0.274951	-0.21856	0.834552	-0.197788	-0.126622	0.327043	0.740799	0.249593	0.315023	0.375422	-0.143171	0.052111	1.45584	0.517118
CENPQ	0.924596	0.00409116	0.0350846	-0.89501	0.0295853	-0.835525	-1.04481	-1.09787	-0.697968	-0.561779	-1.13211	-1.40532	-0.354238	0.570251	-0.814686	-0.0126553	-1.43363	1.13386	0.492366	0.775898	-0.0104535	-0.00176854	0.102749	0.33727	0.357097	0.486229	0.250407
CENPU	1.4316	5.94438e-08	7.08372e-06	-1.19365	0.237952	-0.778736	-1.43859	-0.901623	-1.17161	-1.3389	-1.53246	0.0294571	-0.587984	0.574547	-0.505693	0.659081	0.232346	-0.158035	0.221941	0.532125	0.537795	0.338327	-0.0997566	0.334016	0.676249	0.813702	0.209124
CENPW	1.08045	0.0498485	0.19915	-0.657162	0.423291	-1.06156	-1.192	-0.616947	-0.794219	0.357201	-0.635449	-1.15467	0.679732	0.835682	0.353876	1.60978	-1.50272	2.70568	-0.260378	1.87279	2.06835	1.49298	-0.148851	0.338673	-0.555405	0.132106	-1.69498
CEP55	3.42625	1.24184e-09	3.26589e-07	-3.1098	0.316444	-1.74226	-3.65484	-3.42101	-3.31756	-2.86834	-3.65484	0.0396877	0.788925	-0.127282	-0.0227274	-0.253248	0.323097	1.82135	-0.0120768	0.829063	0.599809	0.253309	-0.712309	1.80082	0.526585	0.410935	-1.20284
CEP70	0.710057	0.00266149	0.0258735	-0.465005	0.245051	-0.431858	-0.638471	-0.367172	-0.499852	-0.262641	-0.590039	-0.430926	0.0760944	0.0444529	1.02815	-0.200007	0.620657	0.273471	0.314105	0.653381	0.477511	0.848554	-0.105232	-0.143928	0.250984	-0.80494	1.01849
CEP72	0.89577	0.000140221	0.00290867	-0.69962	0.19615	-0.483699	-0.614377	-0.334512	-0.650719	-1.43859	-0.675822	0.211264	-0.098819	-0.347739	-0.511424	0.424857	-0.25926	0.104413	0.040212	0.937215	0.198573	-0.126529	0.232759	0.286904	0.877742	0.255093	0.913135
CEP76	1.13367	0.00407849	0.0350153	-0.751666	0.382009	-1.04687	-0.892315	-0.802191	-0.764622	-0.447499	-0.556499	-0.808375	-1.03789	1.14614	-0.193958	-0.549975	-1.14841	1.49862	0.0506245	0.56302	1.18924	0.58358	0.574774	1.28554	1.23516	1.2879	0.436142
CHAC2	1.20294	0.000901666	0.0117954	-0.787246	0.415693	-0.684826	-0.722867	-0.506046	-0.45559	-0.865201	-1.48895	-0.63785	-0.0604999	1.28381	0.609439	-0.146268	0.470154	-0.259363	-0.407038	1.39228	1.52626	0.160572	0.0396877	0.00388717	0.546584	2.04685	0.0825797
CHCHD1	0.607665	0.0237236	0.12089	-0.533085	0.0745806	-0.732036	-0.6864	-1.25858	-0.936014	0.17809	0.23643	-0.244959	-0.41361	0.640684	0.215513	-0.415116	0.335245	-0.840783	0.0500741	0.267603	0.584492	0.88373	0.71487	-0.378281	-0.178485	0.561189	-0.588877
CHCHD10	0.976758	0.0202483	0.108421	-0.402922	0.573835	-0.590517	-0.521402	-0.359456	-0.695365	-0.0660485	-0.184746	0.371143	-0.113149	-0.454588	2.99065	-0.338907	0.108784	0.569706	0.591745	0.677237	1.2847	2.58181	0.616202	0.454539	-0.162263	0.483251	-0.479498
CHCHD2	0.620601	0.0134229	0.0814413	-0.549354	0.0712473	-1.08807	-0.493319	-1.06838	-0.88566	0.0553284	0.183974	-0.0361805	-0.420771	0.0547392	0.137722	-0.383005	-0.562088	0.176184	0.00678454	0.38447	0.833012	1.01211	0.695455	-0.0573267	-0.195785	0.166354	-0.671722
CHCHD7	0.758395	0.0059979	0.0465193	-0.584913	0.173483	-0.672526	-0.618135	-0.762671	-0.91629	-0.400509	-0.139345	0.0716252	0.246765	-0.305249	1.24379	-0.180055	-0.0323134	0.473574	0.4705	0.915161	0.859768	0.217529	0.872176	-0.0263536	-0.452214	-0.869594	-0.729385
CHD7	0.695676	0.0027162	0.0262777	-0.46735	0.228327	-0.56083	-0.675126	-0.414621	-0.384559	-0.495691	-0.273272	-0.172104	-0.279466	0.315551	0.555871	-0.14214	-0.398118	0.500681	0.30021	0.0140456	0.271194	-0.116573	0.46613	1.08544	1.16764	-0.603528	0.688396
CHEK1	0.81994	0.000683028	0.00961112	-0.650265	0.169674	-0.420771	-0.796358	-0.472504	-0.554535	-0.472007	-1.18542	-0.545039	0.29805	1.06395	-0.358936	-0.134962	-0.27513	-0.308372	0.426662	0.403271	0.562348	0.795247	0.524538	-0.62765	0.401456	0.326693	0.16267
CHMP4C	3.27755	5.91395e-10	1.85358e-07	-2.78999	0.487559	-3.01653	-3.24586	-2.80576	-3.01653	-2.59456	-2.0607	0.150267	-0.660024	-0.817543	0.259341	0.394172	-0.167394	0.955197	0.751446	0.73215	1.91513	0.988095	0.958274	1.70506	1.01849	-0.140778	-0.240951
CHODL	1.59126	0.0132406	0.0807326	-0.490881	1.10038	-0.416059	-0.326901	-0.453787	-0.553803	-1.2312	0.0364605	-0.446419	1.44225	1.84975	0.56745	3.45059	1.13876	-0.0681225	-0.177797	-0.0202017	3.45059	1.86163	1.99528	2.99065	-0.838183	-1.35294	1.76278
CHST1	0.841804	0.0421374	0.178836	-0.243211	0.598593	-0.222829	-0.291397	-0.263459	-0.392937	-0.225146	-0.063497	1.00695	0.536789	0.136718	0.0853473	0.980202	-0.102093	0.000195885	0.197228	-0.077599	0.520747	-0.200439	1.93633	3.48082	-0.292097	-0.0527584	1.42114
CHSY1	0.743999	0.00774517	0.0557613	-0.546374	0.197625	-0.65758	-0.834033	-0.76177	-0.831239	-0.0173931	-0.176226	0.0116318	-1.02004	0.563962	-0.176183	-0.0311504	0.254991	0.482586	0.650221	1.12093	0.358924	0.22724	-1.05358	0.940747	0.323885	0.699365	-0.191532
CHTF18	0.890486	0.00258632	0.0253426	-0.606289	0.284197	-0.87711	-0.796978	-0.343752	-0.32399	-0.734306	-0.561595	0.330157	-0.345676	0.68167	0.0454671	0.111903	-0.788214	0.709057	1.2229	1.36261	0.39475	0.972817	0.49777	-0.596936	-0.137314	0.647025	-0.56083
CITED4	0.602143	0.0105664	0.0688378	-0.44049	0.161653	-0.386488	-0.44682	-0.269443	-0.114954	-0.988815	-0.43642	0.108666	0.326182	-0.167293	0.43857	0.903464	0.179421	-1.24164	-0.0831178	0.362779	0.0493001	-0.181605	0.228474	0.499692	-0.237891	0.463557	0.937887
CKAP2L	0.873845	0.000242909	0.00443203	-0.59796	0.275885	-0.253019	-0.492526	-0.285654	-0.309541	-0.997759	-1.24926	-0.0359951	0.416203	0.521697	0.0988486	0.0162662	0.0582889	-0.0464124	-0.0200703	-0.0231507	1.09462	0.238769	0.0303949	0.57793	1.07026	0.83693	-0.420419
CKAP5	0.764717	0.00567024	0.0447825	-0.58881	0.175908	-0.864258	-0.506355	-0.676798	-0.639131	-0.490184	-0.356131	-0.114184	0.13127	0.21871	-0.474803	-0.0328841	-1.25099	0.559937	-0.407626	0.680633	1.64241	0.434283	0.58063	0.343103	0.0528368	0.384336	0.066859
CKB	0.72194	0.0166341	0.0939726	-0.696734	0.0252064	-0.411133	-0.601682	-0.202398	-0.2842	-1.76727	-0.913719	0.102204	-0.382808	1.03183	-0.10388	0.0951486	-1.45775	0.311317	0.176395	0.390988	0.627499	0.0285069	0.428036	0.403054	0.0407473	-1.18605	-0.101935
CKLF	0.633594	0.0238376	0.121336	-0.321943	0.311652	-0.427122	-0.599735	-0.233583	-0.826358	0.128543	0.0265996	-0.156614	0.642236	-0.203765	-0.384482	-0.214557	-0.0768929	-0.262327	0.774618	-0.00252988	1.05755	0.809875	0.941537	0.532987	-0.656507	1.4874	0.697897
CKS1B	1.96441	4.10983e-07	3.12401e-05	-1.5375	0.426908	-1.84143	-1.40319	-1.62119	-1.97364	-1.26299	-1.12256	-0.265747	-0.545526	1.36121	-0.0161508	-0.298637	-0.807515	0.716348	0.223073	0.71048	1.09389	0.956893	0.508578	0.983834	1.14234	1.12153	-0.0540731
CKS2	2.46926	2.14563e-08	3.10709e-06	-2.25117	0.218093	-2.21093	-2.43621	-2.12195	-2.45963	-1.75285	-2.52543	0.0744424	0.347928	0.551043	-0.494674	0.410008	-0.666472	-0.0530807	0.690824	0.904487	1.27463	1.12846	0.442108	0.079129	-0.29346	0.684218	-1.5901
CLDN10	1.29885	0.0167663	0.0944922	-0.775268	0.52358	-0.630953	-0.841508	-0.371932	-0.474927	-1.35457	-0.977721	1.07619	1.72413	-0.723023	2.47864	2.716	0.111446	-0.0427317	-0.0260852	-1.90083	1.4407	1.03749	0.675573	-0.172225	0.676006	-1.4762	0.7822
CLDN3	3.07345	2.73482e-06	0.000140613	-2.56306	0.510385	-2.62191	-2.15552	-2.9562	-2.43621	-2.77232	-2.43621	-0.0333757	2.44178	-0.318756	0.0266156	0.530152	-0.687836	-1.05183	0.691818	1.92714	0.757297	2.08635	1.65126	1.00879	0.370603	-2.41349	1.17966
CLDN4	1.0942	7.04507e-06	0.000296307	-1.04862	0.0455803	-0.698832	-0.90641	-0.592788	-0.740453	-1.67464	-1.67862	-0.00652665	0.935388	0.00936194	-0.0506612	0.207897	0.162553	-0.186765	-0.634906	0.158972	-0.0898018	-0.0352196	0.0130689	0.536896	0.364971	-0.449657	-0.206287
CLDN6	0.755129	0.0425144	0.179769	-0.38036	0.374769	-0.563583	-0.362851	0.152773	-0.269374	-0.652746	-0.586378	-0.345824	-0.491842	1.54281	0.0690848	-0.190861	-0.645229	0.732714	0.863654	0.545463	-0.0893059	-0.451148	0.403441	1.51884	2.3235	-0.582184	0.79319
CLDN7	1.39737	1.71801e-06	9.827e-05	-1.2367	0.160668	-1.52963	-1.3319	-0.883294	-0.764354	-1.74785	-1.1632	-1.00437	-0.341068	-0.146395	0.0350466	-0.277314	0.662116	0.156625	-0.430362	0.294239	0.446688	0.886603	0.664966	0.515923	0.676523	0.169207	0.262267
CLEC5A	0.683522	0.0163204	0.0929346	-0.468514	0.215009	-0.48901	-0.820485	0.0733815	-0.511424	-0.627921	-0.435623	-0.0116327	0.936207	-0.921113	1.10946	0.717029	0.744233	0.320388	0.00417666	-0.363899	0.454889	0.774896	-0.311468	0.689248	-0.993253	0.512338	-0.221357
CLIC1	0.613665	0.0151688	0.0884684	-0.544956	0.0687084	-0.667101	-0.586128	-1.19398	-1.05806	0.12768	0.107855	0.574774	-0.20713	-0.780483	-0.0107225	-0.696977	0.789066	0.388271	0.087751	-0.0205742	0.119453	0.716023	0.406334	-0.0814212	-0.295976	0.610235	-0.499287
CLMN	0.944803	0.00371753	0.0326891	-0.477935	0.466868	-0.455217	-0.905594	-0.334248	-0.531466	-0.0743565	-0.566731	1.26041	-0.264908	-0.0135417	0.111825	0.157239	2.47864	1.20589	0.443478	0.732298	-0.0887521	0.192092	0.681846	0.630884	0.501735	-0.334796	-0.224458
CLPTM1L	0.68309	0.000110289	0.00243926	-0.607812	0.0752775	-0.742941	-0.767894	-0.838183	-0.766492	-0.384242	-0.14712	-0.255093	0.17708	-0.0639653	0.157322	-0.166004	-0.484799	-0.112127	-0.0624701	0.468799	0.179053	0.317545	0.313108	0.637107	-0.41361	0.290399	0.222095
CLPX	0.603784	0.0338029	0.154399	-0.31525	0.288534	-0.477143	-0.526462	-0.551393	-0.669764	0.249371	0.083893	1.04519	-0.45482	-0.717163	-0.425696	1.10326	0.239685	0.0297832	0.279961	0.91872	0.491664	0.653576	-0.115733	1.27083	-0.0749128	-0.476885	0.849083
CMC2	0.666943	0.011113	0.0712881	-0.445087	0.221856	-0.479081	-0.819075	-0.45211	-0.774525	0.0538945	-0.199627	-0.285599	-0.046769	-0.0815685	-0.0891198	0.38354	-0.839683	0.0377442	0.297282	0.608087	0.137821	0.601097	0.829882	0.153072	-0.303385	1.72672	0.420572
CMSS1	0.927382	0.00830541	0.0585573	-0.804173	0.12321	-1.37205	-0.933215	-1.00838	-0.880224	-0.26803	-0.363133	-0.0310745	-1.42446	0.756455	1.06296	0.0104321	-0.962549	0.129209	0.695197	1.07262	0.167481	0.814672	0.297918	-1.12551	0.394172	0.704039	-0.590204
CMTM6	0.90147	0.000244067	0.00444606	-0.733775	0.167695	-0.64817	-0.945666	-0.896577	-0.841177	-0.608241	-0.462816	0.879188	1.21082	-0.614669	0.299864	0.038889	0.274704	0.440038	0.0992411	-0.122551	0.299756	0.281641	0.528084	0.294239	-0.00527881	-0.564139	-0.656706
CMTM7	1.01837	8.64702e-06	0.000345246	-0.910407	0.107958	-0.48283	-1.16836	-0.772956	-0.913719	-1.07839	-1.04619	0.294696	0.785735	0.449516	0.0436044	0.124569	0.0705095	-0.0360721	0.0933479	-0.628322	0.595543	0.445518	0.287036	0.293271	0.0991267	-0.606064	-0.58468
CMTM8	1.58169	0.00033209	0.00558692	-1.01029	0.5714	-1.26299	-0.820234	-1.15757	-0.813166	-0.756813	-1.25099	-0.720942	1.92714	-0.269327	-0.483606	1.35167	1.22361	0.620657	0.592755	1.26903	1.79292	1.82981	0.651887	0.274545	0.556153	-0.674142	-0.799774
CNNM4	0.673561	0.00207093	0.0215769	-0.309879	0.363682	-0.241976	-0.555897	-0.177206	-0.346897	-0.431744	-0.105552	0.057779	0.654963	-0.131794	0.679894	-0.152198	1.34614	0.382351	1.18816	-0.0631555	0.52224	0.230726	0.698408	-0.177797	-0.129427	0.444032	0.268589
COA6	0.966411	0.00289053	0.027439	-0.723112	0.243299	-0.572868	-0.954865	-1.15088	-1.22249	0.0233664	-0.46094	0.438095	0.438466	-0.355449	-0.644823	0.0339827	-0.568481	-0.680775	0.386506	1.88675	0.965134	0.971953	0.301486	0.0916058	-0.215472	0.637264	0.206539
COL13A1	0.716078	0.0193757	0.105276	-0.407899	0.30818	-0.271686	-0.402241	-0.447144	-0.509681	-0.672262	-0.144378	-0.563583	-0.801393	-0.0769383	1.36884	0.809572	0.506531	1.70203	0.257426	-0.305372	0.557714	0.275016	1.2038	0.434458	-0.499852	-0.139306	0.201938
COL23A1	0.959497	0.0142471	0.0848224	-0.351321	0.608176	-0.0614582	-0.0690878	-0.312375	-0.140935	-0.910671	-0.613398	-0.454588	0.297699	-0.00324282	0.505139	-0.181645	1.9445	1.27316	2.46683	1.54935	0.659081	0.674029	0.10348	-0.203837	-0.122991	-0.362297	1.58616
COL4A1	1.21063	0.000449677	0.0069706	-0.755657	0.45497	-1.02836	-0.84462	-0.888073	-0.59658	-0.0196659	-1.15664	-0.368997	-0.605361	1.12463	-0.0820228	0.332512	1.34852	-0.0643794	0.294239	0.354287	0.701905	1.74802	-0.0021523	1.0038	0.670154	1.31997	-0.495613
COL4A2	0.944699	0.00028787	0.00503553	-0.772149	0.17255	-1.04228	-1.06779	-0.808375	-0.837199	-0.089245	-0.788004	-0.115167	-0.505936	0.713229	-0.545354	0.236936	0.507569	-0.855506	0.618442	0.479781	0.0822266	0.6141	-0.297852	0.117907	0.677024	0.846176	0.187222
COMMD2	0.729766	0.024921	0.125124	-0.408777	0.32099	-0.496152	-0.479348	-0.77618	-0.759518	0.284522	-0.225983	-1.01417	-0.682409	0.799123	1.50121	-0.114318	0.656016	-0.240019	0.693509	1.09777	-0.0719276	1.43021	-0.0408013	0.203937	1.0511	0.00423799	-0.137634
COMMD5	0.688381	0.00268948	0.0260964	-0.421405	0.266976	-0.333953	-0.496048	-0.630038	-0.720942	-0.182999	-0.164449	0.127265	-0.402711	-0.21269	0.290951	0.540789	0.22822	-0.262573	0.0241923	0.373324	0.936207	1.37459	0.59584	0.750455	-0.369096	0.275224	0.00163574
CORO1B	0.586465	0.00920502	0.0626445	-0.341652	0.244812	-0.415116	-0.624404	-0.436363	-0.521965	-0.00030228	-0.0517623	-0.0294269	0.686163	0.134894	0.547301	-0.112184	-0.157359	-0.751161	0.372556	0.685995	0.901689	0.714091	0.784414	0.261961	-0.190555	0.552979	-0.48436
CORO2A	1.00268	0.00625076	0.0479281	-0.662118	0.340564	-0.407626	-0.463574	-0.452882	-0.569267	-0.726419	-1.35294	0.26254	1.52875	-1.00637	0.825114	-0.501817	0.985036	-0.167132	-0.0693599	1.3576	0.511444	0.867898	1.15129	1.09946	-0.224503	-1.08519	-0.0857389
COX5A	1.10625	5.06234e-05	0.00135153	-0.848056	0.258199	-0.911074	-0.909436	-1.10717	-1.32443	-0.527622	-0.308597	0.597615	0.242093	-0.441207	0.612563	0.407878	0.464828	-0.280071	0.0452528	0.7377	0.869307	1.25808	0.0820117	-0.465266	-0.365151	0.545118	-0.179572
COX5B	0.763736	0.00176917	0.0190936	-0.597078	0.166658	-0.909436	-0.673265	-0.992641	-0.832958	-0.180506	0.00633962	0.0206405	0.343865	-0.0285439	0.660606	-0.512791	-0.0105162	-0.24228	0.361845	0.53431	0.92445	0.983834	0.577145	-0.620718	0.123373	-0.245838	-0.202855
COX6A1	0.702547	4.31651e-05	0.00119422	-0.536149	0.166398	-0.785194	-0.789968	-0.70022	-0.551037	-0.16269	-0.227785	0.061032	0.340753	0.269075	-0.237628	0.592469	-0.383577	-0.108678	0.143138	0.447602	0.427452	0.286904	0.25155	-0.288505	0.385834	0.407159	0.0677834
COX6C	0.939416	0.00112513	0.0137663	-0.747464	0.191952	-0.748353	-0.961993	-1.482	-1.27416	-0.0367163	0.0184382	-0.394693	-0.174023	-0.427674	0.834552	0.146762	0.302366	0.827379	0.303037	0.0914325	0.776917	0.636241	0.671974	0.695455	-0.0241532	-0.791197	-0.403141
COX7A2	0.88434	0.00351047	0.0312531	-0.752485	0.131856	-1.10481	-0.888073	-1.4668	-1.23657	0.023336	0.158013	-0.0539665	0.946793	-0.158113	1.0038	-0.432683	-0.90202	0.0733051	0.158409	0.136313	0.648081	0.555684	0.143553	0.794499	0.282934	-0.521672	-0.565229
CP	3.37755	1.74321e-05	0.000596182	-2.92316	0.45439	-3.31756	-3.01653	-1.76727	-2.5762	-3.54383	-3.31756	2.61841	0.413118	-3.1631	2.5142	-0.797939	-1.14658	0.440811	0.914296	0.719587	-0.212249	1.27892	1.58442	2.00537	0.689248	-1.70919	1.12093
CPSF1	0.670609	0.00423527	0.0360234	-0.547835	0.122775	-1.08519	-0.902823	-0.668101	-0.569446	-0.107876	0.0464292	0.0359736	-0.279763	-0.074041	0.509757	0.461826	0.0943733	-0.925977	0.28772	0.273001	0.597191	0.830711	0.372625	0.399445	-0.355084	0.279071	-0.542431
CPSF3	0.996483	0.000767472	0.0105212	-0.658778	0.337705	-0.981957	-1.12001	-0.77426	-0.970644	0.0139498	-0.119744	0.880111	-0.189909	1.27892	0.0830474	-0.351093	0.0782922	-0.243901	0.540318	1.16007	0.811934	0.712814	0.658906	-0.727275	0.636509	0.292769	-0.218237
CPSF6	0.620684	0.00725807	0.0533195	-0.403179	0.217505	-0.65092	-0.684234	-0.556199	-0.567273	0.0667991	-0.0272487	-0.181205	-0.0213359	0.393217	-0.409315	0.492533	-0.531991	0.31978	0.821578	0.289541	1.09837	-0.304567	-0.0924489	0.0013523	0.895995	0.00995557	0.698615
CPT2	0.71524	0.00216272	0.0221798	-0.449674	0.265566	-0.342508	-0.66618	-0.680116	-0.760104	-0.1031	-0.146038	-0.276775	0.283751	-0.0800436	-0.0556687	0.0220739	-0.090041	0.731847	-0.0630428	0.69	0.368114	0.550249	0.545717	0.919637	-0.207538	-0.400328	1.3111
CRABP2	3.10773	7.20273e-10	2.19731e-07	-2.64763	0.460097	-2.69221	-2.41349	-3.65484	-2.52543	-2.45963	-2.14018	-0.2887	-0.252883	1.39228	1.23853	-0.00860134	0.901223	-0.290376	0.866544	0.0407169	1.2673	0.582461	1.2781	0.282804	1.23746	-0.868666	-0.0166503
CREB3L4	0.647891	0.0295189	0.140748	-0.529201	0.118689	-1.10567	-0.756487	-0.531674	-0.494674	-0.274045	-0.0126553	0.246656	-0.521089	-0.0196659	0.899381	0.468799	-1.14398	-0.80987	0.413811	0.129578	0.57793	0.465314	0.457889	-0.174391	0.941098	-0.963449	0.931013
CRIP2	0.601802	0.0292319	0.139721	-0.25989	0.341912	-0.973408	0.169881	-0.248612	-0.186566	-0.218505	-0.102128	-0.0544724	0.791955	0.586667	-0.807985	-0.0368731	-0.451624	-0.174841	0.832757	1.22007	1.00049	0.474463	0.615674	0.76639	-0.38245	0.0196322	1.07074
CSE1L	1.1037	2.62263e-05	0.000805541	-0.727768	0.375937	-0.826047	-0.941266	-0.785194	-1.03844	-0.347684	-0.427973	-0.264832	-0.246946	0.677652	-0.286403	0.0186539	-0.18372	1.39329	0.624716	0.87257	0.552343	0.58316	0.782379	-0.125477	0.709453	0.554579	0.35357
CSK	0.627319	0.0313381	0.146449	-0.435987	0.191332	-0.0844761	-0.531337	-0.652209	-1.06077	-0.322825	0.0356999	1.36522	-0.0220854	-0.0382159	-0.0500001	0.563648	-0.187242	-0.994315	0.306805	0.841045	0.522616	0.94975	0.338517	-0.697411	-0.563974	0.902975	-0.17602
CSNK2A1	0.617898	0.0365607	0.162745	-0.44736	0.170537	-0.422499	-0.539379	-0.54214	-0.563448	-0.37156	-0.245136	0.252941	-0.815589	1.44502	-0.151881	-0.0347289	-1.05595	0.498197	0.282256	0.301747	0.730024	-0.219902	0.109808	0.992447	0.918421	-0.926964	0.40275
CSTF3	0.721598	0.00286349	0.0272418	-0.479545	0.242053	-0.499732	-0.477945	-0.796634	-0.769207	-0.0485034	-0.285249	-0.107122	0.347224	0.230239	0.472493	-0.142447	-0.220958	1.65126	-0.0382661	0.687837	0.784604	0.461501	0.0121322	-0.105838	0.0447165	-0.525268	0.320745
CTB-92J24.2	1.01033	0.000470593	0.00722362	-0.827189	0.183141	-0.451737	-0.611127	-0.960471	-0.789387	-1.23773	-0.912682	0.206539	0.137988	-0.533054	-0.669117	-0.0190424	0.0508023	0.927906	1.13386	0.391754	-0.750027	0.179871	-0.434178	0.903464	0.314197	1.09462	-0.00531946
CTBP2	0.660032	0.00330132	0.0301008	-0.551568	0.108464	-1.11496	-1.07416	-0.533287	-0.766192	-0.0659047	0.245097	0.26289	-0.490531	0.427213	0.0442197	-0.173188	0.0381687	0.703788	0.860168	0.45003	0.0828447	0.0196762	0.218886	-0.122067	0.104584	-0.0720605	-0.619197
CTCFL	2.55413	0.00701029	0.0520089	-1.59008	0.964051	-1.32012	-1.32146	-1.92447	-1.37744	-1.77196	-1.82501	-1.35569	3.38992	3.63341	2.65575	1.10017	-2.77232	2.97456	-0.000368771	-2.38638	2.58181	2.02615	0.811934	1.52029	3.52174	-2.25673	-0.019433
CTHRC1	2.48742	8.89552e-05	0.00207683	-2.10671	0.380709	-3.08491	-1.25932	-1.62821	-2.28616	-3.01653	-1.36512	0.0552317	1.70506	-1.12068	-0.932737	1.17103	1.6374	1.80082	0.17765	0.399609	-0.0463103	0.0987524	1.56188	-0.813344	-2.43621	0.918078	1.91513
CTPS1	1.53693	7.01606e-06	0.00029563	-1.09722	0.439716	-1.44915	-1.05419	-0.918668	-0.930932	-0.901162	-1.32919	-0.541284	1.27243	0.914296	1.08544	0.367099	0.0240745	-0.158206	-0.104237	1.9445	0.326274	0.316443	0.265578	-0.0634231	-0.132109	0.412404	1.10617
CTPS2	0.750207	0.00612649	0.0472603	-0.433956	0.316251	-0.798678	-0.60847	-0.411278	-0.637298	-0.0838188	-0.0641916	0.275224	-0.100875	-0.398775	0.201726	1.45004	-0.137584	-0.170081	0.631527	0.806781	0.805731	1.04393	1.19262	-0.564139	0.0794978	-0.14896	0.0933479
CTTNBP2NL	0.702482	0.00147763	0.0166872	-0.392808	0.309674	-0.357561	-0.619197	-0.63188	-0.634719	0.0206014	-0.134092	0.0332997	0.0532917	-0.150086	0.602516	0.582461	0.457153	0.578919	0.58775	-0.0140405	0.425719	-0.0784743	-0.273272	1.16176	1.16928	-0.0642976	-0.117198
CUTA	0.751257	0.0165197	0.0935572	-0.728844	0.0224125	-1.28116	-0.893625	-1.5901	-1.18306	0.258102	0.316791	-0.175674	-0.403592	-0.298302	0.256758	-1.51862	0.0813994	0.542466	0.392045	-0.0986104	0.28772	0.47419	0.478262	0.868832	-0.1031	0.153232	-0.578409
CWC22	0.839183	0.000323108	0.00545185	-0.670619	0.168564	-0.810331	-1.2683	-0.96793	-0.527983	0.27986	-0.729028	-0.348206	-0.304489	-0.0553851	0.615087	-0.21856	0.251762	0.130665	0.848554	0.428135	0.0713728	0.59031	-0.112389	-0.0564259	-0.201946	0.29569	0.76285
CX3CL1	0.769781	0.0157357	0.0905514	-0.507721	0.26206	-0.506355	-0.665657	0.166882	-0.346992	-0.98464	-0.709563	0.91236	0.57247	-0.408701	1.39329	-0.479081	1.00935	-0.990917	-0.169392	0.0797873	0.249874	-0.00888513	0.119547	0.0385096	-0.2942	1.66138	0.507569
CXCL16	0.883726	0.0316013	0.147258	-0.601578	0.282148	0.320174	-1.30232	-1.28301	-1.22384	0.0258464	-0.146315	0.810126	1.50712	-1.14841	-0.192445	-0.732375	1.56751	0.841973	-0.0155317	0.301084	0.365847	1.04058	-0.531849	-1.25611	0.0222143	1.04889	0.885752
CXCR4	1.80113	0.00194538	0.0206066	-1.31574	0.485388	-0.0392885	-1.77525	-1.02273	-1.49395	-1.74226	-1.821	-0.660534	0.557341	2.22686	1.19529	0.377821	-1.35294	2.72869	0.592888	-0.399369	2.23525	-0.0223849	1.21918	-1.13635	0.40479	-1.21027	1.00996
CXorf38	0.690021	0.0191084	0.104198	-0.266364	0.423657	-0.0320754	-0.334796	-0.481404	-0.671507	0.00338213	-0.0817832	1.16007	0.813349	-0.314503	1.67024	0.590644	-0.210137	-0.21813	0.270087	0.742663	0.739398	0.776917	1.51377	-0.447296	-0.262641	-0.00655878	-0.039349
CXXC5	2.81266	1.47039e-07	1.41951e-05	-2.58978	0.222883	-2.0607	-2.23005	-4.6114	-2.59456	-2.0607	-1.98126	-0.985388	0.262683	0.316068	0.816085	-0.484799	0.301025	1.03183	0.496322	0.368628	1.29172	0.171692	1.22786	0.810126	-0.208352	-1.34459	-0.504772
CYB561	0.711603	2.66781e-05	0.000814946	-0.492625	0.218978	-0.563697	-0.625895	-0.46212	-0.373706	-0.55069	-0.379641	0.704397	0.82045	-0.168362	0.00792573	-0.0979924	0.647956	0.199594	-0.191795	-0.0189297	0.23886	0.299864	0.205855	0.443921	-0.0729743	0.0695202	0.415365
CYC1	1.68964	0.00014422	0.00297007	-1.20714	0.482499	-1.13364	-1.16712	-2.16936	-1.69085	-0.696454	-0.385432	-0.0658369	-0.208798	-0.766928	1.2046	0.0485762	0.690552	-0.466061	0.105044	0.531867	1.79568	2.6051	1.18236	0.61208	0.226723	0.365691	-0.14067
DAG1	0.648567	0.00541565	0.0432606	-0.524723	0.123844	-1.0302	-0.70599	-0.851616	-0.623825	0.0152358	0.0480543	-0.361289	0.663821	-0.567695	0.620463	-0.307265	-0.108225	0.183786	0.23621	0.50199	0.749694	0.730803	0.129867	-0.254676	0.472822	-0.338048	-0.370753
DAPL1	2.63752	0.0210285	0.11133	-0.546289	2.09123	-0.65128	-1.1789	-0.0122292	-0.417828	-0.705589	-0.311908	0.698615	0.926571	-0.580174	3.08443	6.77149	-0.0732546	2.78277	5.63047	4.61668	5.13774	5.63047	1.39228	0.03111	-0.612121	-1.87244	-0.104932
DARS	0.666064	0.0161152	0.0921791	-0.584638	0.0814256	-0.957343	-0.769504	-0.964009	-1.00838	0.17698	0.0144282	0.0756613	0.128588	-0.997164	0.592755	-0.355008	0.066859	-0.787409	0.981388	0.438466	0.551899	0.891908	0.497243	-0.297051	-0.177723	0.11787	-0.425473
DBF4	1.31069	0.00105948	0.0131815	-0.950661	0.360029	-1.40964	-1.52136	-0.899841	-0.684826	0.0196017	-1.20789	-0.650513	1.91513	0.573377	-0.71416	-0.798678	-0.469059	0.91872	0.624601	1.68637	0.375644	0.299054	0.00851096	0.655644	0.272598	1.30469	-0.241473
DBI	0.640449	0.0324991	0.150248	-0.610154	0.0302948	-0.456128	-0.915343	-1.12466	-1.2151	0.0505576	-0.000247304	0.156108	0.234023	-0.775792	0.379657	-0.548464	-0.260887	0.292707	0.0391294	0.532355	0.734925	0.948674	0.717525	-0.892315	-0.211025	0.384653	-1.24656
DBN1	0.718957	0.00232491	0.0233301	-0.556743	0.162215	-1.19003	-0.583882	-0.420419	-0.473806	-0.532155	-0.14016	-0.814298	-0.47917	0.585065	0.783764	-0.483232	-0.142548	0.29569	0.47003	0.237316	0.447265	0.521464	0.464927	0.373828	0.71048	-0.354162	-0.0209856
DCAF13	0.78553	0.000104647	0.00234507	-0.653725	0.131805	-0.644662	-0.855214	-0.867241	-0.872832	-0.302318	-0.380085	0.0589254	-0.539237	-0.240169	0.605145	0.283895	-0.444809	1.02568	0.226964	0.0864754	0.209596	0.391754	0.101108	0.337365	0.165275	-0.0666084	-0.0924807
DCAF17	0.677392	0.0116498	0.0736317	-0.39551	0.281882	-0.642115	-0.671187	-0.636103	-0.305446	0.0578126	-0.17602	-0.688052	-0.159767	-0.33187	0.910323	-0.516955	-0.410577	0.823289	0.497538	0.909637	0.854539	0.530384	0.106934	0.633594	-0.333011	0.712814	0.971288
DCDC2	1.47606	0.000176606	0.00345068	-1.02477	0.451289	-1.21705	-1.00709	-0.763626	-0.992641	-0.953118	-1.2151	1.15738	-0.0917807	-0.499601	0.340607	-0.0842879	0.0722848	0.378857	1.06766	0.556761	-0.412943	0.225942	0.335432	2.07844	2.01611	-0.867951	0.947717
DCTPP1	0.601076	0.000437624	0.00681608	-0.495617	0.105459	-0.524639	-0.568818	-0.384143	-0.706593	-0.399806	-0.389704	-0.602307	-0.401458	0.124975	0.241306	0.218082	-0.299104	0.235656	0.0371659	0.395257	0.203475	0.564827	0.530259	-0.0286884	-0.0992081	0.589882	-0.0227761
DCUN1D1	0.678423	0.00399019	0.0344642	-0.407034	0.271388	-0.202398	-0.687836	-0.50091	-0.42371	-0.160859	-0.466493	-0.592951	-0.0274158	-0.353071	1.28014	0.76639	0.398558	0.674479	0.27605	0.85545	-0.0542497	0.517991	-0.0248287	0.0780611	0.755454	-0.406418	0.198573
DCXR	0.770329	0.0065702	0.049629	-0.380812	0.389517	-0.554089	-0.375839	-0.416285	-0.447959	-0.36104	-0.129659	0.144248	-0.17058	0.156016	0.808145	-0.421102	1.18236	-0.324548	0.352491	0.754951	1.10493	1.12384	0.88152	1.28281	-0.304721	0.331394	-0.669474
DDIAS	0.848513	0.00119588	0.0143858	-0.754567	0.0939469	-0.553962	-0.543816	-0.500055	-0.485125	-1.23296	-1.21148	-0.392177	0.128775	0.667461	0.119511	-0.0643574	-1.04115	-0.620468	0.183586	0.697228	0.505139	0.416717	0.109012	0.311654	0.0571336	0.983834	-0.558749
DDR1	1.01041	0.000600538	0.00874066	-0.98806	0.0223457	-1.77525	-1.22249	-1.37414	-1.09039	-0.551911	0.0858016	0.00881937	0.735865	-0.567428	-0.254155	-1.3635	0.355387	0.753055	-0.00885812	0.269689	0.0962155	0.184703	0.492118	0.0799245	-0.0334283	-0.360293	-0.0305815
DDRGK1	0.624229	0.0475716	0.192912	-0.484888	0.139341	-0.415416	-0.784456	-0.937399	-0.780483	0.0453701	-0.0369462	-0.216178	-0.97935	-0.0760696	0.565681	0.144136	-1.17161	0.300675	0.143331	0.250149	1.33801	0.185408	1.3121	0.467829	-0.630038	-0.326314	0.921685
DDX21	1.05215	2.15346e-05	0.000701867	-0.975389	0.0767594	-1.37414	-1.24506	-1.67464	-0.720165	-0.229866	-0.60847	-0.517443	-0.258753	0.448239	0.0697095	0.128942	-0.615078	0.395554	0.104075	0.624925	0.344991	0.447602	0.231918	0.072177	-0.199743	0.374449	-0.423414
DDX39A	1.32846	0.00860705	0.0598751	-0.887503	0.440952	-1.26166	-1.11409	-1.02083	-1.0105	-0.334512	-0.583434	-1.24926	0.126992	1.30816	0.730481	-1.22984	-0.739595	-0.0495222	0.604459	2.43096	3.11938	0.907314	0.527145	-0.277777	0.137293	0.633309	0.0757228
DDX55	0.653663	0.0165925	0.0937836	-0.412533	0.24113	-0.304489	-0.794219	-0.430926	-0.352452	-0.165719	-0.427394	0.455972	-0.0930109	0.89447	-0.298302	0.0620531	-0.403932	-0.130015	0.381195	1.8386	0.35604	0.076522	0.333718	-0.980202	0.27586	0.77519	0.313926
DEFB1	2.66104	0.00146973	0.0166318	-1.73942	0.921615	-1.87244	-1.86597	-0.774829	-1.84143	-2.24627	-1.8356	-0.531466	-0.202649	0.0844892	2.46683	1.21356	3.38992	-1.84143	0.122508	1.15504	1.39731	3.95468	2.09978	1.72413	-0.929525	-2.49911	3.14176
DEK	0.898458	0.00362519	0.0320625	-0.838906	0.0595526	-0.827169	-1.34317	-1.57157	-1.14475	0.0997407	-0.246512	-0.151023	-1.21027	-0.156689	0.0806808	-0.865629	0.0613253	1.12937	0.322024	0.35754	-0.0392301	0.435929	-0.581371	0.0902828	0.759342	0.07641	0.644154
DEPDC1	1.61647	2.04123e-06	0.000111464	-1.24114	0.375329	-0.846591	-1.29311	-0.793164	-1.01773	-1.72428	-1.77196	-0.681716	1.01757	0.279277	0.150991	0.42897	-0.309965	0.493982	0.222403	0.753055	0.769609	0.739044	-0.646938	1.55865	0.454397	0.816806	-0.040872
DEPDC1B	2.90246	2.314e-06	0.000122273	-2.24891	0.65355	-1.36654	-2.25673	-2.28616	-2.1837	-2.80576	-2.59456	-1.48489	-0.491356	2.3235	1.85787	-0.25966	-0.733025	1.23965	2.00005	0.164533	1.92321	0.503176	1.37459	0.329114	1.40376	0.99006	-0.683775
DEPTOR	0.844138	0.00116708	0.0141584	-0.688415	0.155723	-0.687064	-0.757043	-0.571883	-1.09559	-0.703398	-0.315518	0.36048	0.570629	-1.00382	0.0240745	1.23853	-0.0322458	0.110998	0.0376089	-0.0827766	0.203161	0.73215	0.50875	-0.340005	-0.585675	-0.043796	0.793502
DERL1	0.829492	0.000225423	0.00418982	-0.609825	0.219667	-0.560382	-0.667349	-1.04619	-0.773217	-0.335039	-0.276775	0.305849	-0.056652	-0.613398	0.829882	-0.039349	-0.0205742	0.640898	0.0457469	0.0266673	0.446024	0.71487	0.18565	0.87257	-0.304894	0.673705	-0.192329
DGAT1	1.1959	0.0015056	0.0169381	-1.02901	0.16689	-1.2712	-1.2068	-1.86597	-1.03696	-0.355756	-0.437368	-0.448348	-0.677525	-0.0213112	0.343865	-0.0620156	0.18945	-1.45498	0.0937589	0.135644	1.38847	1.66397	1.10105	0.637447	-0.472504	0.173862	0.079413
DHCR24	1.37824	0.00244734	0.0242298	-1.15492	0.22332	-2.38638	-1.63538	-1.13847	-1.41862	0.212875	-0.563583	1.12682	0.0763381	-0.769207	0.529154	-0.0924042	0.905598	0.588361	0.733339	1.2781	1.03545	0.80926	-0.517283	-0.792191	-0.653082	-1.76188	1.07675
DHFR	0.961549	0.000762259	0.0104748	-0.663539	0.29801	-0.241771	-0.804132	-0.807985	-0.806177	-0.518191	-0.802977	0.690824	-0.511517	-0.055986	-0.72352	-0.0673466	-0.116967	1.07074	0.971953	0.40821	0.626487	1.07262	1.17403	0.149546	0.447685	-0.516792	0.148188
DHRS11	0.984004	0.00419564	0.0357962	-0.673315	0.310689	-0.846879	-0.846049	-0.861184	-0.565572	-0.742567	-0.177642	-0.673265	-0.135898	-0.122091	0.0760068	-0.87457	0.314105	0.48812	-0.63623	0.215371	1.97143	0.463557	0.942661	1.59076	0.763131	0.5429	0.0450302
DHRS13	0.811371	0.00154678	0.0172804	-0.491832	0.319539	-0.361353	-0.565389	-0.0893446	-0.173925	-0.9177	-0.843278	0.0886106	1.57388	0.912605	0.394024	-0.444695	-0.109618	0.465547	0.220773	-0.168478	0.81778	0.0826642	0.557341	-0.175729	0.77137	-0.286566	0.413118
DHTKD1	1.0723	0.000350042	0.00581202	-0.868698	0.203604	-0.858632	-0.932737	-0.629671	-0.985388	-0.802636	-1.00312	-0.0135213	-0.586274	-0.704664	-0.759518	-0.824127	0.733769	0.520646	0.262267	0.0137415	0.85078	0.0225071	0.941098	0.93138	0.487588	0.419405	0.962595
DIRAS2	0.905229	0.0470611	0.191594	-0.159167	0.746063	-0.121143	-0.551724	0.541117	-0.31316	-0.128234	-0.381858	-0.0258875	2.93633	-0.282807	1.26232	0.955894	-0.192068	-0.325784	1.32133	1.60978	0.285661	-0.433052	1.81829	2.5142	0.833294	-0.388224	0.0477248
DKC1	1.07642	0.000942308	0.0121396	-0.798052	0.278368	-1.11409	-0.883626	-0.973408	-1.12256	-0.488066	-0.206567	1.75079	0.902573	-0.0147291	-0.903508	0.0696855	-0.688052	0.364211	0.450491	0.962595	0.209455	0.592631	0.573852	0.219525	-0.252944	0.810826	-0.593508
DLAT	1.04184	0.000339814	0.00569593	-0.738908	0.302936	-0.768885	-0.967461	-0.964581	-0.945666	-0.373049	-0.413805	0.318243	0.640898	-0.000368771	0.409725	-0.555286	-0.794931	0.370927	0.286749	0.664966	1.66397	0.791457	0.741002	0.684218	-0.405922	-0.14184	0.173165
DLGAP5	2.90444	6.39726e-09	1.19e-06	-2.58352	0.320918	-1.80686	-3.1631	-2.13081	-2.86834	-2.28616	-3.24586	-0.567428	0.218886	1.50121	-0.405328	0.599993	-0.0629843	0.438026	0.268995	0.605617	1.96152	0.233646	-0.346138	1.17021	0.043688	0.372922	-0.898156
DNA2	1.72862	5.51771e-06	0.00024754	-1.40121	0.327406	-1.69085	-1.57157	-1.18415	-1.13746	-1.31823	-1.50503	-0.97935	0.236637	1.32974	-0.49413	1.47043	-0.659446	0.913885	0.309681	0.0849593	0.616715	0.0490901	-0.108262	0.75228	1.31457	0.677892	-0.276194
DNAAF2	1.12114	0.000760611	0.0104584	-0.786914	0.334227	-0.824127	-1.21148	-0.988815	-0.916722	-0.10402	-0.676317	0.423362	-0.922113	0.891516	-0.612121	-0.16887	-0.547926	1.05572	0.926155	1.53568	0.715303	0.633814	0.536789	0.703054	0.223307	-0.518959	0.472933
DNAJB11	0.998782	0.000429569	0.00670949	-0.709257	0.289525	-0.769915	-1.11708	-1.13304	-0.656206	-0.0742143	-0.505083	-0.0205742	-0.797939	-0.571233	0.819174	-0.175782	0.31066	0.773711	0.553104	0.14022	0.0873273	0.800871	-0.010916	0.89447	0.82187	-0.136292	1.14372
DNAJB13	0.843302	0.0398716	0.172385	-0.397293	0.446008	-0.247013	-0.13801	0.188324	-0.0284142	-1.09787	-1.06077	-0.190456	1.83537	2.00005	0.718528	0.869307	0.621883	-0.0932877	-0.0401873	0.233072	0.02789	-0.764955	-0.729946	2.00005	0.113479	-0.71121	1.24654
DNAJC9	0.72595	0.000563471	0.00835529	-0.689765	0.0361847	-0.765388	-0.838768	-0.701931	-0.88157	-0.339601	-0.611333	-0.448625	-0.501186	0.338059	-0.368259	-0.32507	0.922091	0.318174	0.088208	0.0753835	0.246199	0.340447	0.125832	0.114807	-0.040507	0.477034	-0.783634
DNMT1	1.27425	0.000590147	0.00862783	-0.896931	0.377322	-0.828588	-1.18605	-1.06615	-1.4668	-0.535557	-0.298444	-0.861862	-0.044904	0.971288	-0.211327	-0.406687	0.0204744	0.273262	0.718528	2.17823	1.05265	0.786629	0.0694845	0.241818	0.39159	1.35303	-0.495062
DNMT3A	0.619136	0.0114043	0.0726783	-0.188921	0.430215	-0.234855	-0.218505	-0.108093	-0.203398	-0.254276	-0.114398	1.13657	0.471708	1.52875	1.19348	0.102459	-0.0461109	-0.279466	0.0323645	0.401003	-0.0107485	-0.155134	0.283345	0.845045	1.14146	0.00381083	0.234917
DNMT3B	0.715001	0.0118287	0.0744672	-0.3824	0.332601	-0.0029725	-0.308372	-0.411718	0.463771	-1.07256	-0.962549	-0.0861384	-0.437187	0.926821	1.31302	0.979707	-0.190197	0.621424	0.00612496	-0.00986186	0.880907	-0.686175	0.352197	0.573297	0.754142	0.418347	-0.0948147
DNPH1	0.664584	0.0107162	0.0695961	-0.474436	0.190148	-0.499852	-0.683511	-0.730463	-0.634032	-0.248323	-0.0504336	0.359445	-0.456512	1.52029	-0.333953	0.327699	-0.901623	0.232839	0.171743	0.110458	0.562223	1.00274	-0.188414	-0.345096	0.516195	0.1955	0.268836
DNTTIP2	0.911973	0.000340816	0.00569821	-0.768863	0.14311	-0.760104	-1.39422	-0.970644	-0.724645	-0.0263536	-0.737212	0.0810183	-0.187214	0.270087	0.00595172	0.0395666	-0.154277	0.00936194	0.439751	0.886983	-0.0121214	0.39423	-0.0156591	0.331106	-1.17306	0.549214	0.824823
DONSON	0.718127	0.0208179	0.110667	-0.498427	0.2197	-0.567878	-1.03072	-0.512639	-0.41839	0.126813	-0.587743	-1.47149	0.132388	-0.262398	-0.0956473	-0.46038	0.291794	0.0728664	-0.0859705	0.367392	1.23965	1.03942	1.00049	0.317317	-0.31754	1.07426	0.673045
DPH2	0.835891	0.000248984	0.00450692	-0.6286	0.207291	-1.10046	-0.639483	-0.406304	-0.591328	-0.523665	-0.510363	-0.417467	-0.241057	0.493982	0.58824	-0.140526	-0.634032	0.220287	0.110785	0.863654	0.00202183	0.615479	-0.0316111	0.375512	0.0557751	0.426218	1.02939
DPM1	0.845855	0.0021841	0.0223589	-0.700479	0.145376	-0.766675	-0.899841	-1.41633	-1.06838	0.107731	-0.159381	-0.598236	-0.588163	-0.13771	0.0103361	-0.363057	-0.383302	1.39902	0.33132	0.642056	0.122912	0.399132	0.357284	0.454397	0.635563	-0.0403001	0.0847711
DPM3	1.05504	0.00186366	0.0199162	-0.724868	0.330174	-1.46393	-0.649554	-1.23296	-0.911074	-0.145459	0.05377	-0.35125	0.701274	-0.265357	1.08725	-0.381348	-0.398775	0.16714	0.700789	-0.040565	0.899808	1.414	1.00556	0.50199	0.990494	0.180987	-0.929201
DPP3	0.877278	4.06169e-05	0.00114707	-0.619405	0.257874	-0.563319	-0.871951	-0.617489	-0.619016	-0.472135	-0.572517	0.31014	0.517374	0.48302	0.42409	-0.300294	-0.313749	-0.205671	0.0398737	0.403591	1.10326	0.725394	0.548263	-0.00327401	0.114706	0.594489	-0.315237
DPY19L4	0.737083	0.00375394	0.0328829	-0.439663	0.29742	-0.682409	-0.511173	-0.688753	-0.486733	-0.0679653	-0.200948	-0.824127	-0.347463	-0.307862	0.301207	-0.161463	0.750908	1.46721	0.694337	0.293513	0.596755	0.0738072	0.406869	0.382702	0.63261	7.63745e-05	0.799632
DPY30	1.00067	9.61032e-05	0.00219884	-0.724934	0.275732	-0.609837	-0.90451	-1.09718	-0.923224	-0.301686	-0.513163	1.0833	0.612744	-0.254608	0.364525	-0.450014	-0.527622	0.541653	0.210768	0.727275	0.837282	0.449301	0.658324	-0.00199247	0.482454	0.198941	-0.520624
DSCC1	1.00511	2.97538e-06	0.000148639	-0.854938	0.150169	-1.02614	-1.24164	-0.681468	-0.673051	-0.533415	-0.973917	-0.513448	-0.0737039	0.0550111	0.0555619	0.545463	-0.330387	0.522355	0.192046	0.176655	0.103992	0.456646	0.0793103	-0.0900027	0.199125	1.04455	-0.0204804
DSN1	0.898094	0.000106729	0.00237923	-0.706678	0.191415	-0.578834	-0.622537	-0.517103	-0.978856	-0.67958	-0.863159	-0.772646	-0.0186791	0.652516	-0.602653	0.496322	-0.0108855	0.482454	0.63466	0.291871	0.416997	0.33629	0.31873	-0.213113	0.615878	0.748603	-0.313699
DSP	1.24363	0.00388015	0.0337559	-1.09244	0.151192	-2.06915	-1.42751	-1.64119	-1.27843	0.0460697	-0.184441	-0.0155634	-0.773217	-0.587161	1.2662	0.496065	-1.0867	0.722003	0.543058	0.0733051	-0.0403169	0.143513	0.308922	1.69713	0.889492	-1.64912	0.431459
DTL	2.0117	3.29233e-07	2.5622e-05	-1.57677	0.434929	-1.50826	-1.70919	-1.20485	-1.89442	-1.50272	-1.64119	-0.330939	-0.155527	1.03992	-0.387705	-0.321695	-0.529081	-0.347684	0.557211	0.861726	0.370438	0.824431	0.630736	1.00646	1.29483	1.80082	0.644925
DUS1L	0.920636	0.00102171	0.012817	-0.585649	0.334987	-0.71121	-0.775792	-0.492628	-0.780887	-0.636975	-0.116402	0.957571	1.13459	-0.467689	0.0652446	-0.108262	0.830297	-0.197187	0.0540238	0.879667	0.543233	0.622405	0.309605	0.749378	-0.474264	1.10879	-0.647614
DUS4L	0.689095	0.00316908	0.0292491	-0.474741	0.214354	-0.16583	-0.455472	-0.426909	-0.626487	-0.477143	-0.696604	0.395162	1.15738	-0.364132	-0.929998	-0.434647	0.117907	0.0781463	0.00132229	0.6288	0.390171	0.346445	0.402332	0.547426	0.197607	0.874033	0.0217118
DUXAP10	2.25799	0.00132543	0.0154278	-1.81454	0.443452	-1.67065	-1.58606	-2.69221	-1.25932	-1.59718	-2.0818	-2.06915	-0.692562	0.751201	0.07597	2.01611	-2.23005	0.906903	-2.04298	2.77124	1.19824	-0.0774802	1.06395	1.00274	2.09387	0.196439	2.13079
DYDC2	0.773201	0.00734565	0.0537335	-0.462114	0.311087	-0.581796	-0.372837	-0.302318	-0.233525	-0.898558	-0.383652	1.60978	1.22192	0.527145	-0.459159	0.527658	0.0766368	-0.708328	-0.103135	0.0225071	0.29484	0.464331	1.03421	0.909928	-0.0825937	-0.502441	0.144086
DYRK2	1.28996	1.88453e-06	0.000104402	-1.0273	0.262664	-0.981508	-1.24281	-1.192	-1.63159	-0.383503	-0.732375	0.186542	0.30572	0.578919	-0.288382	0.473035	-0.118233	0.857691	0.263855	0.342452	0.389036	-0.653833	-0.129205	0.634425	1.01757	-0.153139	0.49617
E2F3	0.939395	0.00112787	0.0137924	-0.58789	0.351505	-0.536259	-0.863873	-0.536259	-0.760625	-0.661744	-0.168577	0.875318	-0.72352	0.4349	-0.114509	-0.32975	-0.612606	1.50341	0.303716	0.503176	0.171466	0.40876	0.0718004	0.997848	1.24493	0.33421	0.554937
E2F7	1.26269	0.000185525	0.00358817	-1.0352	0.227496	-0.666665	-1.12256	-0.535704	-1.01866	-1.57157	-1.29602	0.49982	0.558709	1.2847	-0.799774	-0.51442	-0.191582	0.173749	0.265259	0.575676	0.164717	-0.177851	-1.27277	0.644154	1.04248	0.483382	0.903692
E2F8	2.15257	1.73875e-07	1.57867e-05	-1.66043	0.492142	-1.19474	-1.71483	-1.16712	-1.85194	-1.45775	-2.5762	-0.53761	1.10879	0.52983	-0.177007	1.17295	0.0416346	1.70506	0.0844169	0.992447	1.30894	0.843005	-0.036648	-0.466628	0.68965	0.678927	-0.063497
EBAG9	0.891626	0.00302645	0.0283908	-0.738515	0.153112	-1.25259	-0.958414	-1.17698	-0.914318	-0.127253	-0.00153357	-0.355886	0.724694	-0.764354	0.359334	0.91164	-0.144555	-0.47758	0.493178	0.0885085	0.61699	0.720865	0.133452	0.670154	-1.19003	0.0649979	0.598382
EBNA1BP2	0.869614	0.00231446	0.0232564	-0.702176	0.167439	-1.26979	-0.96687	-1.03963	-0.989609	0.0350105	0.0178357	-0.0140405	-0.101162	0.465314	-0.0144776	-0.652412	-0.739231	0.38369	0.401326	1.50712	0.163886	0.686782	0.212559	0.250861	-0.433264	-0.0336602	0.595728
ECHDC3	0.838973	0.0411269	0.17595	-0.624041	0.214932	-1.05595	-1.06998	-0.476131	-0.629248	-0.224069	-0.28887	-0.0672458	-1.15298	-1.13545	0.0927674	0.223351	0.117503	-1.1518	0.435714	1.24588	0.943572	2.40924	0.323154	0.0269933	-0.622537	1.23853	0.512217
ECHS1	0.645317	0.0434144	0.182103	-0.5703	0.0750162	-0.920729	-0.730463	-1.21027	-1.12068	0.102749	0.457599	1.03047	-1.01508	-0.139345	0.551043	-0.758442	0.0980432	-0.677525	0.212403	0.938509	0.546808	0.721186	0.83645	0.154784	-0.319037	-0.451902	-0.5281
ECI1	0.706046	0.0431183	0.181484	-0.614363	0.0916826	-1.25611	-0.904903	-0.840783	-0.865629	0.0442197	0.137029	0.456441	-0.0244295	-0.303946	0.376803	-1.0649	-0.937886	0.0288192	0.254027	1.01683	1.88675	0.544049	0.540113	-0.990917	-0.430822	0.37054	-0.254555
ECT2	1.22909	9.52989e-07	6.04e-05	-0.99514	0.233946	-0.755027	-1.26166	-0.682671	-0.842154	-0.986554	-1.44278	-0.671722	-0.0788906	0.15745	0.196058	-0.131259	0.297282	0.770471	0.216721	0.621424	0.410721	0.195738	-0.288583	0.780075	0.97574	0.0383049	0.253596
EEF1E1	0.811322	0.00059935	0.00872892	-0.576313	0.235009	-0.675674	-0.605709	-0.578639	-0.611531	-0.376638	-0.60969	0.156333	-0.921113	0.00934043	1.0511	0.356217	-0.762948	0.671974	0.209838	0.205855	0.211004	0.470767	0.161423	0.647144	0.720609	0.477896	0.0947023
EFCAB2	0.615278	0.00620113	0.0476914	-0.423331	0.191947	-0.17826	-0.919803	-0.340775	-0.31002	-0.645842	-0.145285	0.702148	0.119684	-0.216693	0.186736	0.197871	-0.338565	-1.00756	0.446551	0.80215	-0.129578	0.43166	0.403916	0.644585	0.432588	0.620256	-0.224589
EFCAB4A	0.874798	0.00135284	0.0156539	-0.488338	0.38646	-0.0956473	-0.325632	-0.248088	-0.328976	-0.961993	-0.969693	0.959525	1.2673	0.963711	-0.0222829	0.0223542	-0.112441	-0.102345	-0.0272487	1.68335	0.448239	0.493805	0.152353	0.219045	-0.207205	0.492118	-0.0469176
EFHC2	0.677022	0.0422765	0.17916	-0.34952	0.327503	-0.332825	-0.248189	0.0567265	-0.182293	-0.899841	-0.490696	-0.211705	1.15947	0.0976857	2.68144	0.60196	-0.158346	0.151029	0.118628	0.133862	-0.0342152	0.411642	0.209708	0.66397	-0.293201	-0.839683	0.547803
EFNB2	1.27816	0.0154995	0.0895981	-0.8936	0.384563	-1.52388	-1.29791	-1.41317	-0.616355	0.0707534	-0.581038	-2.25673	0.441595	0.375644	1.82455	-0.282647	1.32246	1.79568	1.3323	1.66773	0.268287	-1.28764	-0.0660797	0.144136	1.75994	-0.0401873	-0.846049
EFR3A	0.816516	0.0456289	0.188165	-0.662638	0.153878	-0.67977	-0.980202	-1.3635	-0.950989	-0.0210943	0.0197278	-0.350954	0.66799	-2.06915	0.933004	-0.208903	1.14234	0.0662294	0.21309	1.59245	0.576331	0.516702	0.280174	0.309903	-1.31662	0.841493	-0.732036
EGFLAM	0.808007	0.0188276	0.103007	-0.276433	0.531574	-0.548863	-0.382651	-0.0418814	-0.27921	-0.0952329	-0.310761	-0.465818	-0.153381	0.871788	1.06515	1.26128	-0.230835	0.556629	0.333407	0.0521462	0.168645	1.14488	-0.729623	2.03094	0.85409	-0.0724153	1.81829
EHF	1.43098	0.000133119	0.00279941	-1.07793	0.35305	-1.12068	-1.16014	-0.290774	-0.980202	-1.65964	-1.25611	0.789849	0.789579	-0.805331	1.12463	0.900874	1.2475	1.36361	0.150923	-0.590372	0.156533	0.597385	-0.663251	-0.444355	0.519135	-0.529216	1.04132
EHHADH	1.68958	0.000317186	0.00539986	-1.28278	0.406798	-0.773217	-1.20088	-2.14018	-1.09371	-1.10389	-1.38481	0.723148	-0.234142	-0.782202	1.67565	0.248984	1.7868	1.44665	0.469167	1.13277	-0.215304	0.397823	-1.32012	0.71487	0.280928	-1.2757	1.45947
EIF2S2	0.619935	0.00644717	0.0489095	-0.369992	0.249943	-0.434647	-0.604592	-0.540663	-0.467794	0.00920063	-0.181458	-0.388097	-0.309682	0.493414	0.38521	-0.310371	0.46587	-0.00659472	0.20155	0.492669	1.69419	0.355466	0.259341	0.0526158	0.430109	0.405595	-0.2222
EIF4A3	0.743154	0.00336843	0.0305344	-0.5417	0.201454	-0.71884	-0.759784	-1.05183	-0.489759	-0.290171	0.0601883	0.100625	-0.556029	-0.296021	0.937887	-0.135818	-0.108051	0.58492	-0.0992858	0.363447	0.747705	0.645352	0.25128	1.00605	0.263855	0.351388	-0.834033
EIF4G1	0.8849	0.000459031	0.00706772	-0.819674	0.0652253	-1.2068	-1.28116	-0.895134	-1.06779	-0.294791	-0.172365	-0.496152	-0.134001	-0.515112	0.48771	-0.451737	0.421139	0.492796	0.374784	1.03602	-0.311148	0.355387	-0.0683766	0.0837425	0.427824	-0.546172	-0.113104
EIF4H	0.631915	0.00947711	0.064058	-0.603736	0.0281797	-0.888458	-0.700573	-1.35945	-1.05052	0.0641486	0.312433	0.103533	0.642056	-0.271836	-0.111193	-0.703398	-0.477719	0.345077	0.210492	0.538379	0.0830858	0.472493	0.473667	-0.081471	-0.420771	-0.457519	0.106002
EIF5B	0.730101	0.00176248	0.019049	-0.622877	0.107224	-0.800553	-1.08896	-0.634906	-0.532155	0.107035	-0.78773	0.240378	1.03368	-0.0971003	0.30459	-0.250517	-0.165422	0.45876	0.367036	0.530152	0.357018	0.296843	0.0950154	-0.791197	-0.725231	0.0149306	0.0466397
EIF6	1.39184	0.000140488	0.00290981	-1.21668	0.17516	-1.26505	-1.42446	-1.87957	-1.20197	-0.656206	-0.872832	0.154349	-1.0525	0.606987	1.24654	-0.138987	-0.62765	0.532125	0.102372	0.171743	1.72996	0.482454	0.252333	-0.844408	0.176078	0.61347	-0.602307
ELF3	2.14632	6.82823e-08	7.65833e-06	-1.91084	0.235482	-2.11099	-2.1837	-1.244	-1.821	-2.21093	-1.89442	0.651375	0.530384	-0.558372	0.209708	-0.0319319	1.19621	-0.321218	0.142243	0.805468	1.04393	0.907819	0.126162	0.504529	0.34447	-0.491227	-1.29183
ELOVL1	0.821881	0.0045272	0.03797	-0.650837	0.171044	-0.664151	-0.780887	-0.734519	-0.777634	-0.379209	-0.568624	-0.628928	0.950542	-0.841177	0.154072	-0.0152092	0.113524	-0.777634	0.112086	1.42575	0.172269	0.635348	0.0986167	0.907314	-0.475054	0.0908199	0.814364
ELOVL6	1.16022	0.00599008	0.0464744	-0.738387	0.421831	-1.21148	-1.04619	-0.68061	-0.74157	-0.0787483	-0.671722	1.60522	-0.14046	0.446294	-0.382562	1.94729	-0.866512	0.863915	0.530952	0.53372	1.82455	0.0285975	1.18726	-1.15569	0.948674	0.163599	-0.78554
ELTD1	0.996713	0.00298072	0.028077	-0.598882	0.39783	-0.511645	-0.625732	-0.47003	-0.64333	-0.662613	-0.679943	0.175476	-0.513854	-0.309682	-0.568343	0.357284	1.09561	0.241769	0.573377	0.912605	1.13543	1.9445	-0.385964	-0.162559	0.123932	1.62477	0.120931
EME1	0.735039	2.08866e-05	0.000685631	-0.635049	0.0999902	-0.555286	-0.768505	-0.257806	-0.422587	-1.01118	-0.794931	-0.114605	0.453218	0.4047	-0.200795	0.196294	-0.626934	-0.221221	0.07641	0.269404	0.136062	0.12	0.122776	0.416203	0.192465	0.389583	-0.0137181
EMG1	0.771234	0.0104091	0.0681629	-0.55644	0.214794	-0.852477	-0.437993	-0.910132	-0.90641	-0.349537	0.117907	-0.0304197	-0.142338	1.33353	-0.0292457	-1.40532	-0.719839	-0.205353	-0.0892731	0.758375	0.443365	0.544934	0.648562	0.575851	0.713456	0.508286	0.532125
ENDOG	1.34427	0.000992363	0.012607	-0.81908	0.525194	-1.05936	-0.998304	-0.877493	-1.4149	0.00260818	-0.567034	0.336362	1.54709	0.145361	1.52029	-0.0418513	-0.163172	0.821328	0.0136554	-0.109371	1.30569	2.01611	1.32133	0.624925	-0.96687	0.786629	-0.754407
ENY2	0.598284	0.00497266	0.0404548	-0.474835	0.123449	-0.696977	-0.611704	-1.02614	-0.483232	0.156016	-0.186974	-0.570723	-0.372003	-0.227949	-0.23588	0.479781	0.374378	0.217015	0.315383	-0.192181	0.700026	0.512634	0.0885688	-0.1616	0.657051	0.631257	-0.240578
EP300-AS1	1.27828	0.0121048	0.0755685	-0.269807	1.00848	-0.483232	-0.294128	-0.357255	-0.323476	-0.0806087	-0.0801394	2.716	2.27894	0.869937	0.615878	-0.059978	0.908381	-0.228274	0.0198841	2.78277	1.17879	2.28916	-0.0461455	2.88563	-0.334175	0.544934	-0.286098
EPB41L5	0.610295	0.0394357	0.171212	-0.484042	0.126253	-0.882903	-0.840783	-0.387705	-0.324955	-0.327169	-0.140735	-0.78773	-0.188278	-0.0666681	0.962219	-0.262573	-0.491961	0.416717	0.245886	0.153428	0.449803	-0.159117	0.725196	1.06395	1.44665	-0.89614	-0.591328
EPCAM	2.98483	9.18207e-10	2.59365e-07	-3.10394	-0.119116	-3.93959	-4.6114	-2.77232	-3.08491	-2.6473	-1.56814	0.0241548	-0.906037	-0.525576	-0.0814212	-1.2712	0.293346	0.395003	0.140385	0.244313	0.0564426	0.00526525	-0.000188317	-0.00350489	0.152195	-0.457751	0.0287192
EPHX4	2.68716	0.000228963	0.0042355	-1.9856	0.701561	-2.2209	-1.78068	-1.68744	-1.70007	-2.11099	-2.41349	-0.58235	3.52174	-1.19075	1.40714	2.84776	-0.861862	0.137255	0.343571	-2.6473	1.14804	1.13065	1.94729	1.32661	-0.146773	1.92714	0.916805
EPRS	0.594229	0.0188117	0.103007	-0.449528	0.144701	-0.843659	-0.793164	-0.685461	-0.625081	0.154933	0.0952672	-0.174893	1.07127	-0.144955	-1.04813	-0.0687492	-0.389133	-0.555405	0.471822	0.406334	0.605411	0.221527	0.625522	0.235656	0.350015	0.0836279	0.625301
EPT1	0.990733	3.97611e-05	0.00112823	-0.772667	0.218066	-0.677982	-0.866512	-0.375764	-0.652943	-1.03789	-1.02491	1.2046	-0.145869	-0.137669	-0.181801	-0.281457	-0.553803	0.728209	0.117726	0.53559	0.582954	0.0779113	0.302565	-0.174096	0.699776	0.318342	0.396075
ERCC6L	1.02705	0.0001399	0.00290463	-0.871147	0.155905	-0.283505	-0.871431	-0.546637	-0.544501	-1.32919	-1.65161	-0.670189	0.624716	0.404465	0.0219268	1.02621	-0.418131	0.307044	0.0553284	-0.489896	0.413741	0.532987	0.183491	0.260505	-0.111591	0.713088	-0.359223
ERO1L	0.881467	0.00667534	0.0501497	-0.655167	0.2263	-0.0538782	-1.09965	-0.308146	-1.07256	-0.214496	-1.18227	1.44872	0.829882	-0.856718	-0.180096	-0.0217857	1.44872	-0.183259	0.169434	0.934174	0.378474	-0.0373963	0.160505	-0.200189	-0.900319	0.541117	0.0895406
ERV3-2	1.6453	0.00661514	0.0498533	-0.840704	0.804594	-0.0925433	-1.39169	-0.369495	-0.858151	-1.12645	-1.2059	1.57827	2.99065	1.10105	-1.45775	1.37874	0.988095	2.86636	1.38382	0.0752029	-1.3389	-0.384311	-0.376568	-0.209804	2.77124	0.38521	1.1222
ESF1	1.02652	0.0103001	0.067586	-0.730566	0.295954	-0.680411	-1.51342	-0.875078	-0.434901	0.0858972	-0.965489	-0.135978	-1.07576	1.11906	0.604012	0.11787	-1.48673	1.3576	1.25606	1.02025	0.62005	-0.366732	0.418923	-0.203125	1.52495	-0.547926	0.512748
ESM1	1.42349	0.000721474	0.0100288	-1.11849	0.304999	-0.92647	-0.900805	-0.712602	-0.859036	-1.62119	-1.69085	0.315692	-0.680411	-0.90675	-0.853057	0.361953	1.51884	1.06622	0.209777	-0.125424	0.0857699	0.254675	1.48608	0.813349	0.969208	-1.20789	1.57196
ESPL1	1.1066	0.000296209	0.00514598	-0.759921	0.34668	-0.326991	-0.673051	-0.237628	-0.604042	-1.28418	-1.43363	-0.156011	0.714632	1.43182	-0.376458	0.00390447	-0.299034	0.690552	0.276455	1.09837	1.29358	-0.028905	0.13635	-0.00846161	0.816522	0.291794	-0.338227
ESRP1	2.06582	6.63655e-08	7.55444e-06	-1.82791	0.237909	-2.5762	-2.36839	-1.29183	-1.77525	-2.26904	-0.686762	-0.580346	-0.408482	-0.769915	0.868832	-0.249164	0.23242	0.302858	0.295457	0.414095	0.923671	0.321483	0.80651	0.671037	-0.0725313	0.577577	0.473035
ETNK1	0.741926	0.000843418	0.0112194	-0.517319	0.224607	-0.300509	-0.946143	-0.743266	-0.56448	0.0704831	-0.62	0.0808217	0.45127	-0.130617	0.979226	-0.22011	-0.800365	0.611118	0.460758	0.249931	0.164573	0.144044	0.378004	-0.308597	0.5942	0.484792	0.454666
ETV4	0.681718	0.0377828	0.166181	-0.32378	0.357939	-0.088342	-0.34238	0.102709	-0.335278	-0.78554	-0.493848	0.91347	0.439751	0.0312145	-0.0939637	-0.142377	-0.31181	-0.633852	-0.575385	-0.00944692	0.395003	-0.461338	1.99042	1.11244	1.26041	0.657432	1.15504
ETV6	0.634647	0.00122884	0.0146666	-0.504038	0.130608	-0.503842	-0.636734	-0.327305	-0.655563	-0.316105	-0.58468	0.502452	1.20737	-0.128644	-0.0330246	-0.339502	0.639635	-0.328976	0.0770737	0.00272777	0.230775	0.22822	0.214658	-0.343922	-0.270615	0.331913	0.0995943
EXOSC4	1.01193	0.000933461	0.0120904	-0.55066	0.461271	-0.621701	-0.615078	-0.669474	-0.810331	-0.387367	-0.200007	0.652516	-0.0104158	0.174335	0.646843	0.933374	-0.33743	-0.296155	-0.132333	0.234023	1.22007	1.92321	0.969867	1.20067	-0.249913	0.539705	-0.0880321
EXOSC5	0.912816	0.00763884	0.0552043	-0.565003	0.347813	-0.569267	-0.50463	-0.501256	-0.445451	-0.644185	-0.725231	-0.354601	-1.32443	0.145589	1.04248	0.0826642	-0.0996137	1.09216	0.61826	0.34929	0.834777	1.7532	0.207155	-0.440351	1.17804	0.977641	-0.497269
EYA2	1.6489	0.0159638	0.0915416	-1.46408	0.184815	-1.92447	-1.94112	-1.12256	-1.74785	-1.64912	-0.399369	1.18924	0.109189	-2.0607	1.7868	0.563181	-0.727917	0.922889	0.15575	0.340824	0.915497	0.883272	-0.087811	1.86495	-1.29311	-3.93959	2.33457
EZH2	1.91267	9.04807e-06	0.000359409	-1.60652	0.306152	-1.15088	-2.01606	-1.10233	-2.0818	-1.29928	-1.98875	-0.695125	0.0599455	1.64412	-0.899841	-0.991439	1.07262	0.619346	0.326779	1.26986	0.481699	0.188783	-0.0621888	0.216446	1.03992	1.20666	-0.579165
F11R	0.768509	0.00132634	0.0154278	-0.567074	0.201435	-0.96084	-0.950989	-0.655766	-0.662747	-0.112323	-0.0597805	0.306962	0.240636	-0.314669	0.874475	-0.327832	-0.457519	0.381807	0.193452	0.218539	0.318243	0.0508355	0.744233	1.20287	0.0128415	-0.493734	0.271817
F2RL1	0.659398	0.00100313	0.0126805	-0.51888	0.140518	-0.831239	-0.85636	-0.194192	-0.28131	-0.222564	-0.727612	-0.477438	0.584155	0.302781	-0.837518	0.635719	-0.170259	0.245546	0.528976	0.0499403	0.456191	0.223132	0.30873	0.130366	0.160181	-0.0843708	0.192162
FAIM	1.15407	0.010583	0.0688871	-0.997524	0.156551	-1.44033	-1.01709	-1.25099	-0.988815	-0.344572	-0.943344	0.784134	-0.640133	-1.32306	0.17982	0.0242423	1.12535	-0.0727607	0.508122	0.926155	0.0107616	1.02673	0.693024	-2.69221	0.437422	-0.0216806	1.5389
FAM103A1	0.739965	0.000774047	0.0105796	-0.511397	0.228569	-0.263424	-0.339785	-0.696604	-0.546931	-0.556774	-0.664863	0.943025	-0.0486165	0.109582	0.712289	0.300838	0.471053	-0.178931	-0.596396	-0.0784463	-0.0438756	0.215237	-0.345972	0.682224	0.251825	0.171598	1.09166
FAM107A	0.812664	0.00839473	0.0590081	-0.601192	0.211472	-0.675339	-0.638801	0.0716252	-0.442063	-1.07892	-0.843659	1.23853	-0.367321	-0.63422	0.523121	0.889826	-0.245298	-1.14231	0.541881	0.508578	0.509929	0.443365	0.244925	-0.238437	0.753272	-0.630393	0.988095
FAM117B	0.856512	0.000194051	0.00370607	-0.527596	0.328916	-0.273473	-0.589909	-0.295892	-0.660534	-0.660944	-0.684826	0.0482569	-0.0143224	0.647357	0.257657	0.906183	-0.0268633	0.666471	0.192465	0.446294	0.546309	-0.599074	0.396547	0.539705	0.728209	-0.51773	1.04519
FAM136A	0.95933	6.27151e-05	0.00158057	-1.00194	-0.042608	-1.16205	-0.852477	-0.943344	-1.3826	-0.59156	-1.0796	0.0574083	-0.0761707	0.185492	0.200046	-0.558194	0.101795	0.279515	0.0569852	0.416828	0.168203	0.247736	0.00881937	-0.152342	0.459546	-1.22894	-0.848455
FAM171A1	1.53165	2.23121e-05	0.000718004	-1.19686	0.33479	-1.51065	-1.18542	-1.05419	-1.34692	-1.39806	-0.685916	0.82187	-0.685034	0.126124	-0.273415	-0.339052	-0.809028	1.11505	1.13114	0.609439	0.844079	0.578919	0.750908	0.959333	0.85618	-0.922635	0.592755
FAM174B	1.26382	0.000813945	0.0109419	-0.852256	0.411564	-0.722373	-0.872832	-0.561595	-0.808676	-1.02083	-1.12723	1.89787	0.668431	0.964608	0.0376464	-0.0453857	-0.859036	-0.620718	-0.0922594	0.259725	0.00301293	0.00822795	-0.0368063	1.8386	0.242093	0.603184	1.71584
FAM181A	0.831446	0.00943729	0.0638454	-0.514417	0.317028	-0.41068	-0.202649	-0.0583285	0.186297	-1.40532	-1.19582	1.75994	-0.19612	0.76469	-0.207205	0.82234	-0.136713	0.965782	0.389992	0.918078	0.132323	-0.404565	0.64049	-0.431021	0.136406	-0.611531	0.52956
FAM213B	0.659128	0.0366782	0.163046	-0.592334	0.0667933	-0.96793	-0.822364	-0.539658	-0.937886	-0.260122	-0.0260462	-0.580007	0.221649	-0.227598	0.727275	-0.781846	0.509048	0.127421	0.616715	0.617395	0.713655	1.0038	0.133755	-1.54721	-1.0455	0.406334	0.1738
FAM21EP	0.704355	0.00419764	0.0357962	-0.364192	0.340162	-0.318582	-0.217599	-0.262573	-0.358431	-0.460542	-0.567428	0.800871	1.5307	-0.0789635	1.02427	0.769856	0.0899421	-0.277511	0.00113808	0.439426	-0.0211937	0.26213	1.13814	0.0346168	-0.080635	-0.286098	0.0959145
FAM32A	0.756645	0.00317968	0.0292958	-0.621107	0.135538	-0.732375	-0.802636	-1.09244	-1.0302	-0.0481859	-0.0208068	-0.863513	0.55061	0.619812	0.0302748	-0.244863	-0.651496	-0.282309	0.375798	1.08887	0.304109	0.128278	0.361747	0.6288	-0.299336	0.23392	0.187896
FAM60A	1.58895	7.86732e-05	0.00188486	-1.34127	0.24768	-1.8856	-1.18101	-1.99819	-1.19075	-1.21811	-0.573936	-0.528384	-0.174431	0.130458	-0.11281	-0.573387	0.086815	0.348227	0.463435	0.911169	0.574996	0.118782	0.682025	0.135437	2.25907	-1.27843	0.919912
FAM64A	1.15007	0.000371573	0.0060639	-0.959942	0.190123	-0.55338	-0.816915	-0.728401	-0.603359	-1.46393	-1.59367	-0.840783	0.904487	1.13729	-0.109308	-0.898908	-0.333198	0.085125	0.271264	0.329702	0.018864	0.419489	0.206783	0.46613	1.39902	0.500434	-0.51442
FAM71E1	0.779567	0.0150226	0.0878845	-0.314749	0.464818	-0.453892	-0.421846	-0.161304	-0.433347	-0.406524	-0.0115838	-0.457751	-0.0448391	1.70932	1.60735	1.34707	-0.0753749	0.129262	1.54709	0.567106	0.369398	0.669998	0.485583	-0.0129802	-0.517596	0.502587	-0.389133
FAM72A	1.79255	1.12064e-05	0.000425119	-1.47386	0.318685	-0.800903	-2.16936	-1.34459	-1.84577	-1.13147	-1.55108	-0.219751	0.824194	0.502781	-0.525717	-0.286519	-0.875463	0.251706	0.241595	1.33801	1.45782	0.754142	0.23392	0.709453	0.714091	1.12846	-1.14977
FAM83D	2.43473	5.45718e-09	1.0405e-06	-2.34742	0.0873115	-2.04298	-2.0818	-1.65964	-2.33094	-2.54815	-3.42101	-1.04813	-0.00267624	0.592231	-0.888073	-0.0740723	-0.0294905	0.487383	0.235254	0.310228	0.592469	0.574996	0.455001	0.100562	0.691442	0.433199	-1.03334
FAM84B	0.619636	0.00078671	0.0106824	-0.396194	0.223442	-0.656706	-0.569743	-0.750233	-0.585485	0.229342	-0.044339	-0.0088047	-0.18551	-0.189639	-0.134709	0.37511	-0.208603	0.576512	0.144996	0.571761	0.440265	0.486687	0.249807	0.709057	-0.0654736	0.493551	0.320061
FAM90A1	0.7179	0.00125634	0.0148861	-0.562018	0.155882	-0.421632	-0.488066	-0.212807	-0.405789	-0.984081	-0.859732	0.7591	0.226539	0.0277934	-0.143881	-0.4019	-0.571883	0.0120966	0.227965	0.549214	0.0195442	-0.0109714	1.32438	-0.0830434	-0.00210547	0.444932	0.116332
FANCG	0.681834	0.00432483	0.0366625	-0.486498	0.195336	-0.928241	-0.423323	-0.419737	-0.879297	-0.293847	0.0254566	-0.208297	-0.253772	0.685197	-0.557719	-0.000953902	-0.468975	1.30988	0.214608	-0.00485545	0.80411	0.587435	-0.0527864	0.142703	0.400211	0.492796	0.0357973
FANCI	1.06958	0.000141565	0.00292593	-0.849083	0.220501	-0.786677	-0.950414	-0.4019	-0.788004	-0.972764	-1.19474	0.198038	0.579499	0.967827	-0.15525	0.981388	-0.106227	-1.18542	-0.101849	0.343103	0.457599	0.596373	-0.344409	-0.109788	0.188783	1.00222	0.216135
FARSA	0.827859	0.00451326	0.0378809	-0.599157	0.228702	-0.585068	-0.642903	-0.841859	-0.811694	-0.566271	-0.147147	-0.349928	-1.07892	0.747482	0.216085	-0.68951	-0.450014	0.24966	0.179636	1.36361	0.975423	0.64049	0.104119	0.393957	0.625726	0.822697	-0.0912913
FBLN2	0.79621	0.0157505	0.0905866	-0.4486	0.34761	-0.521672	-0.380752	-0.63326	-0.589909	-0.201439	-0.364566	-0.940715	0.750663	0.709453	1.73496	-0.146865	1.34287	0.350956	0.997848	0.893087	0.386831	-0.182927	0.257312	0.147891	-0.398536	0.726725	-1.06779
FBN3	0.790174	0.0108421	0.070135	-0.405488	0.384685	-0.341249	-0.256721	-0.14012	-0.130511	-0.857735	-0.706593	0.109429	0.318806	0.466705	-0.0498481	-0.125314	0.477697	0.0290892	2.15125	0.354699	0.372226	-0.266911	-0.177642	0.568917	1.95088	-0.0368063	0.011784
FBXO34	0.790778	0.00856582	0.0597494	-0.477551	0.313227	-0.60424	-0.567034	-0.942598	-0.724364	-0.08032	0.0532499	1.31457	-0.261364	-0.661122	0.12349	-0.0781108	0.579338	0.597038	1.33713	0.65985	1.31997	0.551346	0.545599	0.127494	-0.204364	-0.651105	-0.288135
FBXO45	0.874902	0.00640155	0.0486992	-0.55736	0.317541	-0.572246	-0.853403	-0.837199	-0.641334	-0.275194	-0.164786	-0.468174	0.661898	0.201118	1.34028	0.199403	-1.11708	1.56436	0.838808	0.903464	0.171743	0.661517	-0.4019	0.112278	0.879188	-0.478209	0.01197
FBXO5	0.679639	0.0212395	0.112047	-0.372431	0.307208	-0.395097	-0.489647	-0.477438	-0.274993	-0.0202532	-0.577158	-0.612121	0.493414	0.553262	-0.518052	-0.613617	-0.264908	0.667247	0.656016	0.560337	1.40877	0.274243	0.0519918	0.830711	1.15885	1.02568	-0.756487
FBXO6	1.49828	0.00816825	0.0578068	-0.683191	0.815089	-0.348456	-0.758206	-0.760384	-1.27277	-0.287818	-0.671507	2.38987	0.735493	-0.598795	1.39114	2.78277	-0.144977	-1.08344	0.00906101	0.974529	3.22064	1.80384	0.898942	0.484421	-1.16106	1.38631	-0.0473297
FBXW9	0.826219	0.00100883	0.0127104	-0.505852	0.320367	-0.281457	-0.26803	-0.186566	-0.389896	-1.09718	-0.81198	-0.465108	-0.215678	0.849083	0.616068	-0.249544	-0.0414237	0.318866	0.161423	0.818047	0.785258	0.832052	0.0238395	1.30008	0.496886	-0.122741	0.0187661
FDPS	1.14773	5.24778e-05	0.00138737	-0.906591	0.241136	-1.07892	-1.02426	-1.50272	-1.2798	-0.111074	-0.442773	0.443103	-0.359042	-0.350064	0.959984	-0.402794	-0.0653047	0.356387	0.0243036	0.262075	0.466306	0.594489	0.581769	0.023812	1.15676	-0.46623	0.63261
FDX1L	0.677406	0.00879748	0.0607382	-0.354457	0.32295	-0.380752	-0.333085	-0.453134	-0.524781	-0.24052	-0.194468	-0.318394	-0.163222	0.632883	-0.060715	-0.223432	0.0316006	0.430807	0.0339466	2.07341	0.841973	0.384088	-0.010328	0.347091	0.716821	0.556279	-0.105618
FEN1	1.38753	2.05961e-07	1.81377e-05	-1.08568	0.30185	-1.03789	-1.16934	-0.997164	-1.10233	-1.04291	-1.16446	1.00556	-0.176437	0.637854	-0.196424	-0.328863	-0.0654736	0.897181	0.086815	0.899808	0.413643	0.754951	0.481991	-0.327396	0.220607	0.621629	-0.0958491
FGF18	0.82801	0.00936107	0.0634799	-0.58126	0.24675	-0.698187	-0.890959	-0.563974	-0.356645	-0.156977	-0.820818	-0.342909	0.724211	1.15885	0.687202	-0.1218	-0.709859	0.318953	0.324859	0.328387	0.151987	-0.896577	0.970696	1.04455	1.15302	-1.1078	0.264222
FIBP	0.800934	0.00108553	0.0134181	-0.483687	0.317247	-0.620468	-0.539795	-0.755835	-0.814298	-0.0907616	-0.0809638	0.0142986	-0.0522375	0.748773	0.830504	-0.367538	-0.217797	0.739907	0.584637	0.641348	0.874475	0.769269	0.732714	-0.485873	0.44131	0.301747	-0.479579
FJX1	1.83935	7.23462e-05	0.00176978	-1.36626	0.473092	-2.05253	-1.48895	-1.46393	-1.8856	-1.11624	-0.190291	1.12937	-0.157873	-0.637597	-0.757839	0.690552	-1.07416	0.521196	0.862842	1.67024	0.954256	2.27155	0.964608	-0.185239	0.537924	0.0815358	0.698114
FKBP4	0.636735	0.000290679	0.00506592	-0.478855	0.15788	-0.322671	-0.277106	-0.320039	-0.286289	-0.799076	-0.867951	0.196487	0.110884	0.367839	-0.173244	0.0675978	-0.245239	-0.120646	-0.286519	-0.0123265	-0.119945	0.411356	0.255913	0.827379	0.643843	0.449301	0.153394
FKBPL	0.822414	0.00010079	0.00228014	-0.508958	0.313456	-0.408701	-0.847688	-0.435623	-0.619386	-0.437295	-0.305053	-0.0132302	-0.366829	0.263104	0.695197	-0.0202017	0.531867	1.17804	-0.00083085	-0.247915	0.485707	0.658693	0.1769	0.55402	0.67426	0.518827	-0.0723095
FLAD1	0.855543	1.207e-05	0.000448316	-0.573189	0.282354	-0.704664	-0.646596	-0.477719	-0.643549	-0.486272	-0.480333	-0.258473	-0.367445	0.479571	0.49982	0.603798	-0.00478796	-0.0790466	-0.121718	0.681204	0.647956	0.818047	0.381749	0.0307005	0.5111	0.472493	0.222697
FLJ23867	0.651479	0.0325479	0.150383	-0.433335	0.218145	-1.07662	-0.828934	-0.361678	-0.264115	-0.216178	0.147515	-0.301686	-0.651651	-0.721308	0.466581	-0.593954	0.91771	1.05963	1.13543	0.726259	0.34849	0.12159	0.349796	-0.556199	1.24133	0.2544	-0.306098
FLJ41455	1.64115	0.00576853	0.0454647	-0.671515	0.969632	-0.84462	-1.14977	-0.621701	-0.363728	-0.0329801	-1.01629	1.39329	3.22064	0.126408	3.59632	-0.100538	-0.535811	2.23525	0.502221	-0.291723	0.00697061	-0.0410524	0.374539	1.50341	1.06395	-0.406126	2.86636
FLJ46875	0.665154	0.00616212	0.0474552	-0.485097	0.180057	-0.344572	-0.642676	-0.258272	-0.30465	-0.559019	-0.801393	-0.768885	0.713088	-0.125871	0.766155	0.218783	0.733575	0.0923491	0.763131	0.10954	0.780236	0.104525	0.626383	0.381807	-0.496637	-0.633687	-0.383577
FNBP1L	1.04114	0.00320816	0.0295027	-0.876789	0.164347	-1.76188	-1.40013	-1.09636	-0.978255	-0.109565	0.0854549	-0.0301509	-0.625228	0.0343248	-0.517103	-0.0365367	-0.865201	0.99006	1.27892	0.375333	0.192318	-0.00975276	0.319735	1.03421	1.17295	-0.841177	0.156843
FOLR1	3.45429	6.27256e-05	0.00158057	-2.74775	0.706537	-2.83635	-2.28616	-2.59456	-2.24627	-3.65484	-2.86834	-0.480881	-1.36951	-0.115071	3.42291	-1.0105	1.88675	0.443218	2.23525	1.10169	2.353	2.72869	0.00721841	0.977641	1.66397	-3.65484	1.11505
FOLR3	0.662267	0.0354757	0.159679	-0.278649	0.383618	-0.516347	-0.376868	-0.381099	-0.296273	-0.0895163	-0.0117931	-0.683511	-0.182873	-0.411829	2.04978	0.979226	1.32974	0.10348	0.299329	1.21162	0.665711	0.915951	0.17809	0.031079	0.152143	-0.194468	-0.305582
FOXA3	0.921503	0.0496768	0.198846	-0.225588	0.695915	-0.118325	-0.507695	-0.0832882	-0.186183	-0.478326	0.0202881	-0.273473	1.59076	1.80724	3.38992	0.253748	-0.233752	0.489176	-0.116199	-0.629671	1.20984	1.30988	0.0262956	-0.0160059	2.36929	-0.0170896	-0.0253302
FOXJ1	0.585493	0.0126337	0.0780816	-0.487815	0.0976784	-0.220625	-0.652209	-0.172996	-0.188186	-0.688504	-1.00437	0.944677	-0.020877	0.64269	0.215324	-0.14896	-0.00828926	-0.363567	0.296253	0.142135	0.176691	0.23055	-0.493109	0.599219	0.180787	-1.20923	0.378557
FOXM1	2.03106	4.25044e-08	5.55715e-06	-1.70383	0.327228	-1.54007	-1.71994	-1.71483	-1.53246	-2.14018	-1.57549	0.417763	0.662568	1.05173	-0.420301	-0.496232	-0.177904	0.599618	-0.582533	0.329786	0.307044	0.540587	0.0582386	0.789579	0.950542	1.58252	-0.377351
FOXQ1	3.16041	3.84897e-06	0.000183468	-2.74458	0.415829	-3.42101	-2.73095	-1.84577	-2.31781	-3.42101	-2.73095	1.22648	1.94729	0.772817	0.88152	1.32661	1.79816	1.64872	0.808926	1.30469	0.138351	-2.36839	0.715085	-0.828934	-2.02619	-0.340452	-0.351416
FRAT2	1.00629	0.000753151	0.010387	-0.55141	0.454885	-0.519908	-0.572868	-0.925238	-0.886778	-0.28747	-0.116199	-0.383503	0.0272322	1.08135	0.80353	1.16239	0.680977	1.19529	-0.261648	0.239943	1.13657	0.210888	-0.0894251	0.96423	1.13277	-0.549309	-0.0731383
FSBP	1.10253	0.00193363	0.0205107	-0.662513	0.440016	-0.588752	-0.682909	-0.157851	-0.540361	-0.853403	-1.1518	-0.658451	0.0219268	1.78036	-0.466628	-0.0765413	1.20067	0.426767	-0.120572	0.324185	0.368944	-0.198184	-0.0933198	0.841493	1.57827	0.363314	1.74802
FUT1	0.718354	0.00347863	0.0311511	-0.397301	0.321053	-0.635891	-0.320426	-0.324394	-0.315427	-0.708328	-0.0793422	-0.214267	0.407339	0.548404	0.478375	0.107394	0.884398	1.18308	0.734095	-0.291596	0.687991	0.23042	0.403356	-0.690938	1.06166	-0.258473	-0.134397
FUT8	0.831993	0.0117622	0.0742398	-0.395974	0.436019	-0.423027	-0.27508	-0.379741	-0.26631	-0.493924	-0.53776	1.96559	-0.130546	0.0854549	0.316143	0.883272	-0.0473677	1.17755	0.244726	-0.134769	1.11319	-0.110299	-0.765943	1.2475	1.3033	-0.612802	0.44131
FUT8-AS1	0.677161	0.0119952	0.0750687	-0.366368	0.310794	-0.457335	-0.724645	-0.48901	-0.499001	0.0187024	-0.0469176	1.3669	0.0857699	-0.435025	1.05265	0.918421	-0.362297	0.637447	0.477293	-0.261648	0.783217	0.320658	0.369605	0.684477	0.405953	-0.719149	-0.351583
FXYD3	0.907577	0.0127166	0.0784668	-0.535501	0.372077	-0.502547	-0.669474	-0.0733555	-0.0828806	-0.952497	-0.932249	0.382063	0.1143	-0.50687	1.28281	0.571895	1.00751	0.0919069	-0.0687492	-0.660024	2.69153	0.5481	0.36852	-0.0930109	-0.436867	0.799968	-0.139849
FZD10	2.71686	0.000973092	0.0123897	-2.23031	0.486558	-2.13081	-2.00514	-2.62191	-2.14018	-2.73095	-1.75285	1.3358	2.14503	0.214444	-2.26904	1.78327	0.996575	-2.86834	2.64367	0.737491	0.557509	-2.59456	2.84776	-0.178724	-0.360147	0.0781921	2.716
FZD2	0.962271	0.0182966	0.100607	-0.51393	0.448341	-0.607282	-0.845369	-0.362851	-0.700854	0.0373684	-0.604592	-0.320967	-0.712602	1.62742	0.126037	1.39462	-0.663596	0.856985	0.559937	0.493178	1.97622	0.301629	-0.134567	-0.573387	2.25025	0.427452	-0.435157
FZD5	1.133	0.00504575	0.0408397	-0.650412	0.482593	-0.639668	-0.62294	-0.487313	-0.635891	-0.665042	-0.851616	0.848137	-0.0313873	-0.358628	0.869937	-0.475269	-0.633687	1.16863	-0.358628	0.694132	0.165837	-0.976364	1.46383	1.60735	1.72128	0.0718206	1.9445
GALNT2	0.640099	0.00451068	0.0378809	-0.487563	0.152536	-0.461338	-0.651651	-0.584517	-0.821967	-0.33439	-0.071517	-0.0812496	0.461009	0.456646	0.172584	-0.396796	-0.984081	-0.298054	0.362969	0.385834	0.458677	0.215968	0.927906	-0.394755	0.085926	0.36608	0.701905
GALNT3	0.867229	0.000388871	0.00624915	-0.800083	0.067146	-1.48489	-1.08107	-0.568818	-0.603058	-1.03902	-0.0236347	-0.123708	0.483955	-0.61863	-0.626934	-0.790234	0.49442	0.56633	0.427534	0.335094	0.324608	0.0956029	-0.129235	0.229688	0.208314	0.296179	-0.0986477
GALNT4	0.811513	0.0315804	0.147191	-0.383121	0.428392	-0.650242	-0.744584	0.0806808	-0.601377	-0.0380605	-0.345143	1.4407	0.153928	-0.352452	0.508286	1.52875	-0.322825	0.274366	0.363798	0.157577	0.582013	1.26128	-0.602307	-0.010299	-0.171185	-0.562465	2.6051
GALNT6	1.30346	8.1275e-05	0.00193319	-1.08478	0.21868	-0.886778	-1.18744	-0.675674	-1.0525	-1.26979	-1.43651	1.55118	0.507738	0.145053	0.0806119	-0.111193	-1.49604	0.610644	-0.0341759	0.507856	0.954738	-0.209468	0.844739	-0.361353	0.0295186	0.33206	0.146986
GAPDH	1.05688	5.39356e-05	0.00141034	-1.04296	0.013919	-0.921113	-1.13304	-1.95573	-1.64586	-0.359456	-0.242545	0.0909184	0.175144	-0.173706	0.140787	-1.06077	0.010174	0.117045	-0.0273154	0.120296	0.163685	0.161985	0.101323	0.553262	0.375931	-0.414793	-0.111259
GAPDHP73	0.768034	0.0013969	0.0159646	-0.477381	0.290652	-0.13544	-0.35059	-0.201946	-0.264832	-0.887221	-1.02426	0.431825	0.696393	0.768242	0.335245	-0.0830434	0.594042	0.31368	-0.710652	-0.112127	0.0143232	-0.0218799	-0.0128335	0.934671	0.969867	-0.22872	0.761407
GAS2L3	1.21573	0.000777974	0.0106079	-0.840627	0.375107	0.206267	-1.2139	-0.440351	-1.0549	-0.831693	-1.70919	-0.126844	1.88675	1.67024	-0.52711	0.120967	0.355167	0.325036	0.779748	0.429718	0.580753	0.184295	-0.591097	-0.251308	0.811644	0.625522	-0.271772
GATC	0.601195	0.0136827	0.0825796	-0.363594	0.237601	-0.477719	-0.277049	-0.638004	-0.71121	-0.051693	-0.0258875	0.723891	-0.115936	0.431219	-0.573597	0.973757	-0.571233	0.447027	0.0742264	0.773161	0.191512	0.0827142	0.196523	-0.588448	0.881847	-0.0732546	0.948213
GCAT	0.694419	0.00224539	0.0227812	-0.425043	0.269375	-0.70022	-0.398536	-0.465818	-0.554221	-0.248027	-0.183437	-0.241057	-0.147653	0.218616	1.07619	-0.439739	-0.246232	0.915161	0.372997	0.0575292	0.258365	0.512495	0.61088	0.959984	0.497897	0.375512	-0.470941
GCDH	0.599775	0.00497515	0.0404548	-0.292448	0.307328	-0.157545	-0.432206	-0.314503	-0.303511	-0.237795	-0.309127	-0.11042	-0.474547	0.0686531	-0.121563	-0.113518	-0.0217857	0.934671	0.509048	1.19621	0.332881	0.47502	-0.196188	0.677892	0.942437	0.466457	0.352
GCLM	0.830103	0.00869178	0.060275	-0.650444	0.17966	-0.646596	-0.958848	-0.702513	-1.15467	-0.0100533	-0.429986	-0.179628	0.773161	-1.54007	0.382887	0.227624	0.407621	-0.753226	0.390817	0.759342	0.204022	1.05847	0.307132	-0.367227	-0.452006	1.08374	0.571895
GCNT2	0.731544	0.0139733	0.0837184	-0.58887	0.142674	-0.463461	-1.09636	-0.236705	-0.725231	0.0254917	-1.03696	-0.0802672	0.551899	0.332512	0.362604	1.0081	-0.325566	-1.16446	0.361179	0.684477	-0.0564592	0.399988	-1.04423	-0.625228	0.522469	0.445434	0.910323
GCSH	0.73151	0.0218366	0.114173	-0.464871	0.26664	-1.03198	-0.504397	-0.811694	-0.860816	0.46613	-0.0464706	-0.450431	-0.236656	-0.45125	0.346338	-0.199918	-0.768505	0.583365	1.49701	1.21715	0.137416	0.666867	0.789849	-0.613811	0.321781	0.435419	0.991619
GEN1	0.783115	0.000173672	0.00341574	-0.606938	0.176178	-0.428073	-1.34692	-0.45641	-0.408482	-0.0211247	-0.98062	0.147648	-0.167394	0.177596	-0.185828	0.315551	0.289717	0.118551	0.598217	0.547123	0.486229	0.0326903	-0.431537	-0.285012	0.751703	0.147469	0.276117
GFOD1	1.09294	0.0263156	0.12954	-0.356545	0.736399	-0.399636	-0.601124	-0.169875	-0.500613	-0.206727	-0.261294	1.06395	-0.48283	-0.462273	2.83352	0.102132	1.09946	2.83352	-0.0777987	1.55118	-0.0304692	2.08304	0.0532218	1.85787	-0.0377428	-0.0843336	-0.520065
GFPT1	0.757548	0.00398633	0.0344438	-0.662211	0.0953371	-0.949911	-1.07662	-0.933215	-0.783025	0.0239282	-0.254424	0.222095	0.243195	-0.672262	-0.269587	-1.12802	0.802724	-0.0052622	0.510877	0.263682	0.368857	0.206493	0.449803	-0.188498	-0.564639	0.542582	0.743358
GGCT	1.30081	0.000135884	0.00284449	-1.04064	0.260171	-0.963449	-1.37205	-1.76188	-1.55108	0.00059085	-0.595977	0.868832	0.822122	-0.778057	-0.275265	-0.24153	0.970333	1.50534	0.0566003	0.456191	0.546449	0.199831	0.313303	0.495898	-0.523796	-0.345019	0.0915122
GGH	1.46288	0.00375101	0.0328749	-1.20684	0.256041	-0.727275	-1.82501	-1.94711	-1.48673	-0.0132581	-1.24164	-2.41349	-1.18227	-0.457654	0.498197	-0.0999038	-0.559858	0.137649	1.31581	1.81829	0.458889	1.40999	0.149546	1.08635	1.40554	0.265706	0.263855
GGT6	1.10606	0.00656689	0.0496204	-0.664417	0.441639	-0.903997	-0.563448	-0.660723	-0.646217	-1.192	-0.0201217	-0.428439	1.24062	0.809572	1.40053	0.0764763	1.55458	0.114757	0.510072	-0.356131	0.969524	1.18726	1.93155	-0.221956	0.176846	-1.48895	-0.410084
GINS1	2.6134	8.6299e-07	5.60944e-05	-2.00611	0.60729	-2.24627	-1.98126	-1.85858	-2.35209	-1.83121	-1.76727	-0.258789	-1.46173	1.66773	-0.462585	0.0920813	-0.08274	1.13814	1.57827	1.51547	2.06409	0.449172	0.764426	-0.0246011	1.85787	0.907314	-0.0274771
GJA5	0.671783	0.0274739	0.133918	-0.176316	0.495468	-0.155207	-0.373178	-0.0384581	-0.179123	-0.233939	-0.0779898	1.99528	0.095673	-0.180343	-0.367625	1.34028	0.453025	0.662116	-0.099142	-0.193259	1.83537	0.257165	0.407063	-0.147285	0.640898	0.966741	0.261525
GJA9	0.634768	0.00199345	0.0209413	-0.419147	0.21562	-0.366626	-0.564139	-0.433264	-0.352624	-0.300001	-0.498229	-0.497108	0.473316	0.57288	0.167703	-0.29558	-0.071517	0.371501	-0.128438	0.76722	0.119767	0.229393	0.333492	1.02299	-0.415674	-0.00652665	0.80651
GJB1	1.01019	0.00209574	0.0216872	-0.587241	0.422951	-0.415744	-0.474264	-0.227949	-0.214063	-0.971783	-1.21964	0.550412	0.865897	-0.655999	0.516195	1.2631	-0.301999	-0.372003	-0.0813735	0.3909	0.599219	1.25711	1.54045	0.282876	0.21066	-0.586128	1.2879
GLB1L2	0.624349	0.035368	0.159389	-0.283799	0.34055	-0.907091	-0.346793	-0.248771	-0.280813	-0.168921	0.249593	-0.240019	1.51884	0.85618	0.272335	-0.0979486	-0.587388	-0.324218	1.42775	0.716821	0.950542	0.913135	0.581149	-0.31754	-0.496794	0.173044	0.102916
GLDC	1.87881	0.00164776	0.0181515	-1.15346	0.725351	-0.670738	-0.953118	-1.03334	-0.997759	-1.68291	-1.5829	1.62971	0.14083	-0.724364	2.84776	-0.136016	0.595351	0.858433	0.930142	1.43601	2.52344	1.16397	1.414	-1.16528	2.41774	-1.25099	-1.07512
GLDN	0.919142	0.00854527	0.0596576	-0.51199	0.407152	-0.273687	-0.350259	-0.158643	-0.307561	-1.00838	-0.973408	-0.401195	0.253382	-0.0716881	0.954738	1.62255	-0.0851587	0.588977	0.0261237	0.217529	0.226539	2.59202	0.213568	-0.345885	-0.309074	0.303794	0.728209
GLO1	0.71085	0.024502	0.123563	-0.714085	-0.00323465	-1.30816	-0.567428	-1.32443	-1.00266	-0.163654	0.0818273	-0.731168	-0.170127	-0.45744	-1.18542	-1.30522	-0.589318	0.684477	0.345077	0.252465	0.123443	0.629439	0.318681	0.823573	0.600162	0.216721	0.3929
GLRX2	0.72362	0.0110154	0.070955	-0.441277	0.282343	-0.347908	-0.583111	-0.762454	-0.803788	0.0762967	-0.226698	-0.41449	0.456804	-0.240631	0.0228649	0.300131	0.337881	-0.0332175	0.0477675	0.994249	0.733339	1.38382	1.20589	-0.805955	-0.320621	0.961843	-0.112184
GMEB2	0.609625	0.00715684	0.052788	-0.440149	0.169476	-0.840433	-0.627424	-0.629831	-0.735502	-0.00616874	0.198464	0.0419884	-0.463722	-0.0812496	0.337201	-0.36792	0.141639	-0.366626	0.819774	1.02815	0.653576	0.335886	0.651375	-0.221277	-0.208507	0.27956	0.131769
GMNN	1.17087	0.00180817	0.0194229	-0.873637	0.297233	-1.34459	-1.2757	-0.812988	-1.23215	-0.302474	-0.273921	-0.717626	-0.800903	0.320329	-0.105618	-1.00382	-0.449417	0.526356	0.47145	0.649668	0.626984	0.834051	0.00891188	0.898419	2.15829	0.818441	0.520214
GMPR	1.14166	0.041015	0.175696	-0.829198	0.312461	-1.244	-0.973408	-1.64912	-1.07839	-0.109268	0.0789974	2.08304	-0.425045	0.685995	-1.50009	0.277001	-0.226698	1.29919	-0.0629489	0.147946	0.927328	1.70717	0.353525	0.897537	-1.18744	-2.38638	2.40924
GMPS	0.681467	0.000676624	0.00956808	-0.500038	0.18143	-0.54872	-0.490311	-0.614669	-0.520471	-0.385602	-0.440454	-0.114049	-0.0612054	-0.151835	1.15676	-0.730899	0.354528	-0.0211937	0.17809	0.616715	0.18178	0.633094	0.264222	0.0861135	0.381749	0.28079	-0.151791
GNAI3	0.591192	0.0137262	0.0826461	-0.623739	-0.0325471	-0.437993	-0.821256	-1.29791	-1.04988	0.173536	-0.308931	-0.0495222	-1.43363	-0.304433	0.0448024	-0.230131	-0.0190632	-0.104985	0.513521	0.146368	0.225806	0.665943	-0.0356053	0.276164	-0.17052	0.167605	-0.213069
GNGT1	0.758477	0.0411126	0.17595	-0.225119	0.533358	-0.0738533	-0.46884	-0.0471794	-0.28747	-0.120603	-0.35277	-0.183311	2.59202	0.460332	0.208688	0.0447165	-0.544501	-0.120572	1.91513	0.821079	1.32974	0.0836679	1.50712	-0.281182	-0.0846932	0.0361115	0.749378
GNL2	1.35919	1.08227e-05	0.000413396	-1.0428	0.316396	-1.01564	-1.34885	-1.60738	-0.862158	-0.319601	-1.10314	1.0273	0.248655	0.250462	0.367036	-0.0420719	0.0424717	-0.0597064	0.486499	1.57388	-0.135105	0.426836	0.0159348	0.585768	-0.522658	-0.322025	1.11906
GNPNAT1	1.20709	0.000648193	0.00926916	-0.80847	0.398619	-1.12802	-0.823621	-1.37744	-1.11172	-0.437756	0.0277461	1.64412	-0.279262	-0.797603	-0.439188	0.382702	0.314766	-0.119551	0.663369	1.00171	1.72413	0.767845	0.573505	0.246908	-0.217683	0.953894	-0.0417579
GOLPH3	1.09838	0.000879257	0.0115817	-0.984049	0.114328	-1.13304	-1.05659	-1.59367	-1.61121	-0.307063	-0.202723	0.0694514	0.390377	-1.49395	0.36758	-0.857219	-0.100538	0.568702	0.193661	-0.0404519	0.105684	0.515923	0.744975	1.01419	-0.551911	0.246765	0.656016
GOLT1B	0.81578	0.00178433	0.0192029	-0.630005	0.185775	-0.562248	-0.927379	-1.16934	-0.726419	-0.0286884	-0.365955	-0.382651	0.742874	-0.360051	0.744975	-0.717626	-0.471234	0.594613	0.294409	0.297505	-0.0853607	0.627812	0.130641	0.159674	-0.35473	0.889826	0.861726
GORASP2	0.717605	0.0217005	0.113643	-0.66077	0.0568345	-1.0105	-0.900319	-1.31169	-1.07742	0.102884	0.23242	-0.371766	-0.828588	-0.993253	0.701274	-1.02947	-0.176881	0.00417666	0.36396	0.944327	0.400211	0.5838	0.493414	0.284273	-0.489759	0.344233	0.679401
GOT1	0.767438	0.000945801	0.0121573	-0.511932	0.255507	-0.468742	-0.805955	-0.301953	-0.335139	-0.425045	-0.734756	-0.398886	-0.00582232	-0.0178907	0.681458	-0.375839	0.0259355	-0.143397	0.0814798	0.351052	1.10402	0.592469	0.6288	0.812444	-0.0421745	1.01375	-0.219295
GPAA1	0.702714	0.0239959	0.121871	-0.431302	0.271413	-0.621111	-0.58969	-0.736154	-0.65128	-0.209906	0.220331	-0.108469	-0.471476	-0.466628	0.430807	-0.00196218	0.735493	-0.821256	0.311991	0.0224266	1.05403	1.54413	1.24493	1.17966	0.0256706	0.141862	-0.478601
GPAT2	1.2025	0.0491373	0.197267	-0.275491	0.927013	0.0105832	-0.405922	0.0922397	-0.268965	-1.08896	0.00807168	-0.435157	3.19964	-0.0065047	0.67426	-0.121755	-0.401621	3.09569	-0.262117	1.95088	0.0149306	2.93633	2.09387	2.66683	-0.600721	0.670799	-0.643155
GPD2	0.80653	0.00014921	0.00304542	-0.575647	0.230883	-0.562465	-0.788517	-0.709226	-0.623628	-0.281863	-0.488183	-0.149394	0.702761	-0.314192	0.417763	0.0698403	1.0111	0.818441	0.448744	0.261961	0.231488	0.61964	0.0308937	0.331568	-0.425822	-0.239771	-0.120888
GPI	1.02893	0.0191503	0.104323	-0.68318	0.345754	-0.617325	-0.757589	-1.50826	-1.1518	-0.185605	0.1215	-0.153012	-0.598457	-0.869104	0.669233	-0.697968	0.544483	0.44849	0.27586	0.443103	3.14176	1.16069	1.27316	-0.0519378	-0.00145882	0.582461	-0.635242
GPM6B	1.73114	0.000214281	0.00401864	-1.41536	0.315777	-1.93316	-1.38965	-1.21811	-1.26505	-1.40319	-1.28301	0.671037	0.918078	0.216181	-1.1518	1.72996	0.869686	0.504183	0.848816	0.0895905	0.84587	1.97143	-1.01508	-0.62294	0.322783	-1.63538	0.490017
GPN3	0.657313	0.013771	0.0827939	-0.443743	0.213569	-0.722067	-0.678155	-0.370696	-0.707417	0.0512763	-0.235401	-0.328748	-0.211919	1.10946	-0.414916	-0.261648	-0.85636	0.255749	0.189996	1.51377	0.268589	0.175144	-0.0229361	0.177478	0.579124	0.582811	0.661517
GPR137C	1.03402	0.0146525	0.0862711	-0.711989	0.322028	-0.71416	-0.631312	-0.387122	-0.460263	-0.812405	-1.26667	-1.39806	0.629698	1.41792	0.0433839	2.20923	0.10637	-0.419072	0.779552	1.98655	-0.0573267	0.0893227	0.592044	0.401532	0.426916	-1.04923	-0.606391
GPR158	0.967261	0.0241212	0.122344	-0.773916	0.193345	-0.306653	-1.23296	-0.0562598	-0.517879	-0.898156	-1.63159	-0.112957	0.662116	0.838808	0.544155	0.334463	-0.636103	0.621629	-0.978255	1.23265	1.01559	-2.52543	0.420268	1.30988	-0.268106	0.0645653	0.570251
GPR160	2.52894	4.55159e-05	0.001249	-1.98828	0.54066	-1.74785	-2.49911	-0.94526	-2.38638	-2.49911	-1.85194	-1.90083	0.0933051	-0.0912406	1.48975	0.251187	0.0186829	0.70873	-0.0548488	1.93155	3.09569	1.89295	1.20166	-0.327779	0.238317	1.26232	-1.15888
GPR19	0.888336	0.0017965	0.0193158	-0.544205	0.344131	-0.313612	-0.254014	-0.238622	0.0488688	-1.00513	-1.50272	0.111304	0.369487	1.57388	0.403356	-0.00784413	-0.230956	-0.186236	0.56783	-0.0971279	-0.304789	0.208047	-0.0622224	1.29269	0.51681	0.703556	0.648313
GPR27	0.673823	0.0218124	0.114073	-0.602131	0.0716917	-1.03072	-0.434178	-0.252449	-0.507378	-0.992641	-0.395417	-0.0220854	0.489052	1.25459	0.150777	0.337881	-0.683304	0.950542	0.152396	0.46243	-0.123075	0.29433	0.294239	-1.482	-0.120475	-0.875463	0.0672317
GPR39	0.836124	0.00402983	0.0347596	-0.458141	0.377984	-0.501186	-0.670469	-0.10636	-0.495613	-0.380451	-0.594765	1.3111	0.726259	-0.614377	-0.222369	-0.548176	1.35438	0.0158691	0.173645	0.398499	0.129031	0.427824	0.63466	-0.488183	0.874851	1.29919	0.575531
GPR56	1.11538	1.38316e-05	0.000496288	-0.921363	0.194013	-0.912202	-1.17698	-0.483699	-0.97587	-1.16446	-0.81497	0.480287	0.199473	-0.628322	0.702533	-0.316053	-0.364845	-0.288583	0.233748	0.400743	0.183885	0.437739	0.901223	0.567106	-0.581038	0.63466	0.541653
GPSM2	1.11449	3.54922e-05	0.00102793	-0.860733	0.25376	-0.601546	-1.14398	-0.625514	-1.03572	-0.569158	-1.18849	-0.26337	0.0744424	1.28928	-0.189036	0.0336244	0.76722	0.707824	0.233287	-0.135137	0.440516	0.213422	-0.0750649	0.559199	0.590644	0.676813	-0.863513
GPT2	1.65183	3.28391e-06	0.000161204	-1.10509	0.54674	-0.921661	-1.38481	-0.780164	-0.990197	-1.37572	-1.17799	0.589317	-0.164405	-0.304489	0.58492	-0.125658	0.0700539	1.38382	0.33629	1.35566	0.615087	-0.213945	1.68335	1.0511	-0.0934084	0.50615	1.47401
GPX1	0.808828	0.0255114	0.126864	-0.749406	0.0594226	-0.454702	-1.04923	-1.666	-1.52963	0.132688	0.0704441	-0.0611108	0.989461	-0.61057	0.0956029	-0.778057	0.0883702	-0.959453	-0.112863	0.420977	0.857691	0.862842	1.09837	0.0211854	-0.33057	0.691946	-1.32306
GPX7	0.901915	0.0111025	0.0712836	-0.683577	0.218338	-1.56419	-0.506046	-0.750027	-1.58606	0.423551	-0.118696	-0.416394	-0.289554	0.195868	1.57388	-0.290038	-0.945666	0.773998	0.443218	0.392045	0.307931	1.14372	-0.223912	-0.826358	0.317195	0.452794	0.884681
GRAMD2	1.10438	0.00508479	0.0410526	-0.579897	0.524485	-0.414025	-0.61238	-0.479843	-0.51249	-0.609837	-0.850808	2.12361	1.62742	-0.501186	0.330068	0.019798	1.84704	0.494704	0.291404	1.74623	0.817162	-0.0350529	0.876412	-0.749602	-0.565725	-0.0757448	0.145226
GREM1	1.44855	0.0422326	0.179057	-0.14575	1.3028	-0.0696553	-0.274045	-0.132535	-0.0667618	-0.279964	-0.05154	-0.00839865	0.820722	0.741002	-0.349647	4.74808	4.14132	0.445722	3.29814	2.62953	1.09166	-0.159767	-0.257132	3.14176	-0.259881	1.24379	-0.422142
GRHL1	1.06002	0.000580868	0.0085405	-0.694146	0.365875	-0.794219	-1.25755	0.0694158	-0.770875	-0.33057	-1.08107	0.315462	0.933699	-0.0637718	0.971288	-0.059851	2.11782	-0.19317	-0.137445	0.57793	0.218427	-0.0986104	0.20134	0.551753	-0.309826	0.572369	0.256578
GRHL2	0.979474	2.70294e-05	0.000823479	-0.793129	0.186345	-0.575585	-0.572246	-0.428848	-0.587032	-1.87244	-0.722626	-0.131444	-0.0178688	0.0640736	0.411881	0.415817	0.192465	0.50291	-0.00367169	-0.341249	-0.173845	0.0719075	0.112049	0.728737	0.889044	-0.1477	0.408413
GRINA	0.71126	0.0249059	0.125124	-0.352654	0.358605	-0.323331	-0.44406	-0.228549	-0.435703	-0.02621	-0.658073	1.44665	-0.00460737	-0.380752	-0.0702529	1.9445	0.186456	-0.939351	0.0243729	0.372997	1.07675	0.946341	0.484092	0.650959	-0.463354	0.527145	-0.0642601
GRPEL1	0.905857	0.00109387	0.0134882	-0.580823	0.325034	-0.681983	-0.679164	-0.789141	-0.819075	-0.22594	-0.289634	1.02673	1.01683	0.164494	-0.194062	-0.485703	0.299689	-0.378797	0.208529	0.398157	1.0827	0.833294	0.515797	0.635719	-0.68061	1.0224	-0.264629
GRTP1	0.851736	0.000615095	0.00890719	-0.641252	0.210484	-1.17499	-0.792191	-0.515112	-0.805331	-0.383005	-0.176881	0.000339171	0.0435327	0.556012	1.21634	-0.701356	0.510173	-0.368997	-0.345824	0.0480274	0.35086	0.474601	0.158541	0.906903	-0.233991	0.217904	0.534674
GSDMD	0.984292	0.00809946	0.0575514	-0.726097	0.258195	-0.770281	-0.853952	-1.04687	-0.986554	-0.46179	-0.237135	1.18065	-0.0523428	-0.6456	0.994249	0.105645	0.445024	-0.912682	0.109984	0.229209	0.61964	2.52344	0.483607	-0.00476206	-0.698832	0.29484	-0.540938
GSTK1	0.711554	0.0476297	0.193015	-0.466278	0.245276	-0.396595	-0.646395	-0.903997	-1.03334	0.0417713	0.140888	-0.00830987	1.12846	-0.673941	-0.701772	-0.487116	1.26437	-1.10314	0.244655	0.752873	0.639489	1.28281	0.560769	0.497538	-0.49545	1.44225	-0.419072
GSTP1	1.15229	0.000157078	0.00316926	-0.796667	0.355624	-1.24926	-0.999658	-0.855506	-0.933215	-0.672071	-0.0702886	-0.11929	0.915161	0.601739	1.36121	-0.26848	0.230614	-0.506769	0.349445	1.02986	1.15885	0.991619	0.215513	-0.380281	0.119722	0.348156	-0.35709
GTF2H3	0.586237	0.0308318	0.144942	-0.498651	0.0875859	-0.836627	-0.640598	-0.704919	-0.849437	0.02789	0.011784	-0.108513	-0.730463	-0.161304	-0.720699	-0.371817	-0.580174	0.471053	0.682025	1.4127	0.465638	0.244275	0.151441	-0.499601	0.273301	0.108819	0.76469
GTF2H4	0.738218	0.00360835	0.0319377	-0.469194	0.269025	-0.510511	-0.717163	-0.693933	-0.644185	0.0374299	-0.286799	0.100943	-0.71416	0.239996	-0.269248	-0.299034	1.02124	0.682427	-0.0637718	0.876074	0.148368	0.30459	0.0975168	1.00049	1.20737	0.00719296	-0.0356053
GTF2IRD1	1.14346	0.00060555	0.0088024	-0.738241	0.405223	-1.1078	-0.974547	-1.20923	-0.735023	-0.395532	-0.00731049	-0.402621	0.0268473	0.13913	1.04947	-0.0594662	-0.792547	1.05226	0.258247	0.510997	1.52495	-0.0953139	1.17804	1.40714	0.597385	0.282256	-0.193206
GTPBP4	0.765751	0.00322286	0.0295903	-0.618848	0.146903	-0.866512	-0.707151	-0.725921	-0.834033	-0.156643	-0.422831	0.517374	-1.26505	-0.0934683	-0.112033	0.38915	-0.812405	0.866187	0.188475	0.136556	0.675214	0.357284	0.297446	0.0502541	0.92397	0.217662	0.0138354
GUCY1A3	0.965981	0.0138568	0.0831043	-0.502574	0.463408	-0.239834	-0.338778	-0.360674	-0.397217	-0.92032	-0.758618	-0.00791607	1.34287	0.072177	-0.670738	1.18924	2.04978	0.789355	0.176787	-0.299814	0.23928	2.26658	0.0504159	0.222228	-0.674563	1.14902	-0.480179
GUCY1B3	1.21142	0.00125942	0.0148995	-0.769397	0.442022	-0.368181	-0.772956	-0.518052	-0.444891	-1.244	-1.2683	0.0488688	1.28381	-0.425473	-0.914963	1.46721	0.538797	0.863259	0.701689	-0.514314	1.28157	1.75079	0.378164	0.438372	0.566768	0.435714	-0.827917
GYLTL1B	0.697395	0.00298522	0.0280962	-0.452963	0.244432	-0.411212	-0.428951	-0.354327	-0.219751	-0.94526	-0.358279	0.719587	0.689021	-0.25384	-0.0890242	-0.319701	-0.545354	0.683188	-0.424521	1.05963	0.134341	0.459178	0.329786	0.42347	0.0231488	0.0246748	0.997329
H2AFY2	0.602404	0.0408408	0.175087	-0.263536	0.338868	-0.453308	-0.545526	-0.374605	-0.285881	-0.0834082	0.161512	0.0305083	-0.41649	1.28014	0.616202	-0.0481548	-0.325632	0.745944	0.54045	-0.350859	0.162341	-0.651651	0.414665	0.966199	1.70026	-0.292206	1.05016
H2AFZ	0.767887	0.00521931	0.0419451	-0.69328	0.074607	-0.913719	-0.861862	-1.42751	-1.06288	-0.0649966	0.171287	0.00403423	-0.487313	0.91872	-0.0208486	-0.989609	-0.536115	0.260293	0.0610912	0.311317	0.535437	0.359516	0.298131	0.787254	0.386924	-0.205053	-0.490066
H2BFS	1.18074	0.00465222	0.0387911	-0.810383	0.370361	-1.56043	-1.04858	-0.289213	-0.899841	-0.191926	-0.872308	0.185984	-0.0907897	2.25907	-1.07071	-0.168522	0.103127	0.539072	0.0794978	0.355283	-0.00738045	-1.16106	0.929325	1.30469	-0.0324569	1.81404	0.886603
HAGLR	0.706246	0.0202272	0.108384	-0.459625	0.246621	-0.154067	-0.321218	-0.349827	-0.259113	-0.932249	-0.741274	-0.871431	0.938979	0.0834337	0.541117	1.17196	0.313469	0.527929	-0.481876	-0.789141	0.736319	1.12992	0.150074	0.957236	-0.872832	0.365529	0.0452528
HAGLROS	0.902468	0.000247362	0.00448822	-0.524802	0.377666	-0.121346	-0.528761	-0.47758	-0.232445	-0.578409	-1.21027	0.0613989	1.0126	0.153333	0.940364	-0.150027	0.0407169	-0.0486387	-0.0905898	0.207412	0.731605	0.590148	0.922889	1.18403	-0.0677165	-0.0996137	0.654735
HAPLN3	0.605783	0.00842157	0.0591422	-0.369171	0.236612	0.0620531	-0.144821	-0.197	-0.275265	-0.642903	-1.01709	0.525851	-0.49545	-0.229983	-0.038399	-0.0173675	0.93138	0.0898151	-0.205453	-0.0773966	0.294914	0.259531	-0.137146	0.334147	0.708023	0.563181	1.28014
HAT1	0.737668	0.0182097	0.100346	-0.697305	0.040363	-0.839249	-0.807316	-1.41122	-1.07174	0.179	-0.233312	-0.865629	-1.05052	-0.991439	0.56302	-0.628088	-0.122176	0.141262	0.382351	1.03047	0.306158	1.11807	0.26841	0.273209	-0.249164	0.178196	0.291685
HAUS3	0.735249	0.0143703	0.0851786	-0.592038	0.143212	-0.434901	-1.22984	-0.863159	-0.628545	0.193537	-0.589318	-0.675674	-0.00426171	-0.54872	-0.24288	-0.765668	0.331913	0.00803995	1.25063	0.131093	0.702761	0.338571	0.299457	0.770737	-0.933921	0.884681	0.74463
HAUS8	0.782033	0.00304747	0.0285511	-0.557282	0.22475	-0.333354	-0.673467	-0.481185	-0.788214	-0.340534	-0.726941	-0.998304	-0.257806	1.32438	-0.246051	-0.330939	-0.51442	0.229251	0.135352	0.640016	0.681846	0.187828	0.511176	0.486093	0.289809	0.707824	0.749948
HDGF	1.23484	1.69994e-05	0.000585801	-1.08098	0.153862	-1.56814	-1.40964	-1.6378	-1.55335	-0.289295	-0.0276532	-0.0884595	-0.0847545	0.0716252	0.283952	-0.744256	-0.324146	0.786305	0.359899	0.637624	0.405595	0.421893	0.0767984	0.0335197	0.626129	-0.0250946	0.0251561
HELLS	0.695851	0.0020244	0.021182	-0.496976	0.198875	-0.657755	-0.814686	-0.301325	-0.637597	-0.188556	-0.381937	0.062145	0.381475	0.495898	-0.616579	-0.0816071	0.735865	0.82234	0.957236	0.343679	0.136718	0.0933479	-0.656206	0.01781	0.623346	0.20264	-0.336111
HENMT1	0.805755	0.0294617	0.140522	-0.48381	0.321945	-0.530809	-0.377128	-0.66618	-0.661295	-0.0557429	-0.611704	-2.01606	-0.160029	1.18308	0.822122	-0.191381	-0.285703	0.77184	0.564827	0.199051	-0.491121	0.616558	1.11564	1.7179	0.23643	0.0824882	0.985466
HES6	1.06421	0.00129523	0.0151896	-0.725542	0.338672	-0.6928	-0.633044	-0.598795	-0.658712	-0.912682	-0.857219	0.389992	-0.0223173	1.01621	-0.255808	-0.354929	-1.11109	0.477989	0.107655	2.12361	1.00005	-0.0198142	-0.0457344	0.40804	0.573999	0.136166	0.994719
HEY2	1.1479	0.0145165	0.0857005	-0.809183	0.338712	-0.428848	-0.620468	-0.64817	-0.627424	-1.51602	-1.01417	0.023083	2.08304	-1.04988	1.61163	1.68637	-1.23657	0.667005	1.15738	0.363798	0.164412	0.260979	0.616068	-0.0341067	1.3323	-1.60334	-0.622773
HIF1A	0.747938	0.00120886	0.0144859	-0.685675	0.062263	-0.899344	-1.32778	-1.1458	-0.973917	0.246199	-0.0134102	0.00604716	-0.310954	-0.221764	0.0964769	-0.698601	0.357097	0.068909	0.55225	0.416997	0.262809	0.227036	0.235123	0.49617	-0.262958	-0.0135628	-0.214868
HIGD1A	0.616105	0.0262803	0.12945	-0.31958	0.296524	-0.61763	-0.293042	-0.707024	-0.632828	0.164314	0.168727	0.733339	1.19068	-0.596936	0.206162	0.455867	-0.203285	0.438095	-0.28747	0.500791	0.934174	0.908742	1.0655	0.55061	0.0473755	-0.717852	-0.481404
HILPDA	0.813515	5.7448e-05	0.00148521	-0.649769	0.163745	-0.63785	-0.653585	-0.525416	-0.743982	-0.79535	-0.542431	-0.0991754	-0.197093	0.203316	-0.389896	-0.683304	0.678289	0.601739	0.22454	0.585887	0.015463	0.37954	0.0289338	0.309735	0.511444	-0.150163	0.600671
HIST1H1C	1.98872	0.00052475	0.00789886	-1.39016	0.598557	-2.31781	-1.64912	0.0131098	-1.94711	-1.13935	-1.30068	-0.375579	2.07844	2.77124	-0.852012	-0.47003	0.0856184	0.527354	0.199643	1.26232	0.0986167	0.0264822	0.589317	2.72869	-0.386077	1.78929	-0.496393
HIST1H2AC	1.37453	0.00368991	0.0324962	-1.20671	0.167824	-1.90083	-1.70007	-1.82501	-1.70436	0.0635844	-0.173576	0.634909	-0.892315	0.00127123	-0.985868	-0.312262	-0.566583	1.50831	0.016078	0.552979	-1.5901	-0.0398946	0.514378	2.15829	0.0551182	0.519135	1.11175
HIST1H2AD	0.741421	0.0109846	0.0707965	-0.371974	0.369447	-0.513695	-0.437689	-0.13801	-0.288382	-0.235439	-0.61863	-0.129352	0.815253	1.57196	-0.35001	0.239043	-0.0869104	0.177792	-0.0546648	0.168425	-0.0949316	-0.223342	0.104651	1.75079	-0.128671	1.16863	0.982486
HIST1H2AE	1.44046	0.000961505	0.0123034	-0.868976	0.571489	-0.715952	-1.11624	-0.289694	-0.750233	-1.15569	-1.18605	1.28281	-0.137104	2.49842	-0.793164	0.109942	-0.48198	0.529998	0.34216	1.07675	-0.491013	-0.276993	0.757535	2.30639	0.647357	0.568917	1.2038
HIST1H2AG	1.03995	0.000692112	0.00972101	-0.659357	0.380598	-0.492526	-0.934963	-0.34178	-0.53776	-0.674563	-0.974547	0.713899	0.355167	1.78327	-0.841177	0.611259	-0.095748	0.7591	-0.0867497	0.569706	0.0521462	-0.315237	0.36055	0.791955	-0.174481	1.40877	0.197143
HIST1H2AJ	0.799703	0.000217535	0.00406634	-0.584214	0.215488	-0.272256	-0.782202	-0.547926	-0.594363	-0.552052	-0.756487	0.346958	1.45346	0.387143	0.365063	0.156668	-0.44758	0.180276	-0.157851	-0.0497587	0.151119	-0.0763839	0.53431	0.423996	-0.342036	0.427951	0.0944811
HIST1H2AM	0.960386	0.002225	0.0226468	-0.433076	0.527311	-0.287032	-0.364132	0.018864	-0.347519	-0.914963	-0.703672	0.871282	0.919143	1.33801	0.00893125	0.521464	-0.270163	0.962595	-0.554844	-0.0704496	-0.0431185	-0.34737	0.942437	1.52626	0.4563	1.57633	0.600162
HIST1H2BC	1.02516	0.00966033	0.0648557	-0.395019	0.630145	-0.444464	-0.510189	-0.0500442	-0.449803	-0.0219889	-0.893625	0.209777	1.55273	1.92714	-0.355604	-0.0241126	0.118848	0.646086	0.0897161	1.44362	-0.283505	-0.497996	0.724421	2.34396	-0.317991	1.62	0.885231
HIST1H2BD	1.34881	0.000943166	0.0121439	-0.83786	0.510949	-1.30671	-1.37414	-0.2842	-1.07416	-0.227327	-0.760625	1.74	0.847666	1.28554	0.0169004	0.0247687	-0.103927	-0.526857	0.293513	0.565596	-0.196377	-0.95443	0.501217	2.28916	0.0784245	1.07337	1.24062
HIST1H2BE	0.895203	0.00630302	0.0482318	-0.438113	0.45709	-0.997759	-0.565229	-0.126844	-0.247833	-0.0784038	-0.612606	0.459789	-0.0503402	1.97143	-0.32975	-0.0402648	-0.160029	0.224152	0.144439	0.231434	0.157291	-0.264472	0.745944	1.54045	0.0118777	1.72996	0.941537
HIST1H2BG	1.20653	0.00329558	0.0300655	-0.755371	0.451156	-0.833602	-0.825733	-0.42863	-0.48198	-1.02836	-0.933921	-0.0960983	0.480287	2.18652	-0.391222	-0.28131	-0.376138	0.832757	0.340918	0.421576	-0.716853	-0.800903	0.549214	2.14503	0.686561	0.514027	1.72413
HIST1H2BK	1.29536	0.00869877	0.060275	-0.936628	0.358736	-2.1006	-1.25858	-0.436999	-1.4762	0.0305083	-0.377904	0.623522	0.00205556	2.43096	-0.755027	-1.07662	0.536789	1.42341	0.074506	0.370175	-0.687376	-1.41633	0.724894	1.37329	-0.393996	1.53408	0.975423
HIST1H4H	1.10998	0.0369223	0.163812	-0.352732	0.757247	-0.511173	-0.344115	0.230775	-0.457059	-0.0625026	-0.972318	1.27725	-0.229929	3.06415	-0.277182	-0.000986125	-0.486839	1.67293	-0.120063	0.589882	-0.495062	-1.24506	1.64872	3.02532	0.796281	1.4407	1.45584
HIST2H2AA3	1.45525	0.00135621	0.0156797	-0.786219	0.669035	-0.757043	-0.79535	-0.455472	-1.10046	-0.456014	-1.15298	1.02815	3.02532	2.02058	0.244213	0.395047	-0.617151	0.696089	-0.0187387	-0.132015	-0.293847	0.0904485	1.08887	1.80384	-0.261474	1.51016	0.125049
HIST2H2BE	1.5105	0.00212008	0.0218609	-0.938106	0.572398	-0.654019	-1.17608	-0.335039	-1.00312	-1.22617	-1.2342	1.26986	2.03094	1.74	-0.116448	0.252545	0.0739676	1.62477	-0.399173	-0.0680357	-1.03506	-1.6162	1.06685	2.3235	0.642486	0.615087	0.753272
HIST3H2A	0.76843	0.00147489	0.0166672	-0.622787	0.145643	-0.97935	-0.574463	-0.658073	-0.645842	-0.521844	-0.35715	-0.357455	0.565283	0.576939	0.76285	0.794164	-0.898558	0.278405	-0.337917	0.0465342	0.50916	0.465959	0.390817	-0.179027	0.0348468	0.407063	-0.728775
HIVEP2	0.697941	0.0127944	0.0787774	-0.297456	0.400485	-0.259363	-0.322982	-0.372069	-0.360846	-0.197788	-0.271686	-0.219347	0.57426	-0.47003	-0.211278	-0.188498	0.228061	1.72128	0.560337	0.414608	1.10105	-0.201697	0.521831	1.06622	1.43863	0.062194	0.0101429
HJURP	1.32802	8.66134e-06	0.000345246	-1.19483	0.133187	-0.863159	-1.10176	-0.647887	-0.865201	-1.82501	-1.86597	-0.110594	0.127916	-0.0541437	-0.890443	-0.0278259	-0.67977	0.502333	0.376803	0.183547	0.727275	0.323499	0.123781	0.80651	0.327812	0.846833	-0.452536
HK1	0.973204	0.00108328	0.0134015	-0.674617	0.298587	-0.457654	-0.952497	-0.965953	-1.28866	-0.218869	-0.164074	0.46243	0.946341	-0.299458	1.05847	-0.53744	0.769856	0.0533624	0.368944	0.819774	0.086042	0.853381	0.980202	-0.884088	-0.34069	0.483144	-0.0428755
HK2	1.032	0.00112063	0.0137185	-0.698938	0.333065	-0.293042	-0.96084	-0.520989	-0.887221	-0.18462	-1.34692	1.43021	0.184295	0.718528	-0.412218	-0.916722	1.2879	0.770737	0.137111	1.15032	-0.0836208	-0.0594212	-0.0375277	0.395554	0.865581	-0.178526	0.0768452
HLTF	1.27184	0.00734437	0.0537335	-1.07989	0.191951	-1.5829	-1.60334	-2.01606	-1.17306	0.321712	-0.425696	-2.23005	0.000993781	-0.298444	1.10169	-0.587161	-0.774525	0.629226	1.10169	1.30894	-0.0250438	1.45782	0.772149	0.279786	0.891167	-0.920729	0.363701
HMBS	0.628471	0.00165922	0.0182252	-0.401161	0.22731	-0.621988	-0.379838	-0.363567	-0.554991	-0.157718	-0.328863	0.398499	-0.0633106	0.755685	-0.143071	-0.492733	-0.371381	0.0700207	0.103353	0.653137	0.837923	0.842635	0.529998	0.336224	-0.191113	0.271963	0.0991267
HMGA1	0.933738	2.34644e-05	0.000747725	-0.867214	0.0665242	-0.881174	-1.02004	-0.627049	-0.805955	-0.942598	-0.92647	0.148769	-0.0450871	0.633814	-0.576335	-0.514834	0.0441016	0.142426	-0.0196136	0.309047	0.409464	0.183786	-0.285599	0.405664	0.125289	0.824194	-0.720699
HMGB1	0.830282	0.000543467	0.00813246	-0.730451	0.0998316	-1.01417	-0.997759	-1.32146	-1.15664	0.0220344	0.0852908	-0.0250946	-0.217797	0.246851	-0.0138217	0.000231183	0.343179	0.695629	0.146112	0.24813	0.514662	0.119173	-0.254961	-0.381412	0.744233	-0.614875	0.0470668
HMGB3	1.4715	3.75249e-06	0.000179617	-1.11914	0.35236	-0.994315	-1.22516	-1.1518	-1.26299	-0.973408	-1.10717	1.17103	-0.505539	-0.376305	0.405775	-0.206521	-0.264556	1.22464	0.344357	0.194575	0.0888655	-0.0597425	0.666867	1.37713	1.18546	0.159127	0.232593
HMGN1	0.601109	0.0240188	0.12196	-0.606209	-0.00510025	-0.792776	-0.688971	-1.44521	-1.10481	0.18183	0.21268	0.526356	-0.709226	-0.516347	-0.0417264	-0.978856	-0.136993	0.80926	0.0314095	0.169281	0.200557	0.228932	0.423635	0.469897	-0.304027	-0.491842	0.238087
HMGN3	0.725119	0.0486953	0.195946	-0.746764	-0.021645	-1.10637	-1.11813	-1.45232	-1.36654	0.211732	0.351052	-0.40733	0.702148	-0.565229	0.516375	-1.4668	-0.908461	0.617938	0.852009	0.442108	0.449915	0.436228	0.12349	0.923276	-0.621535	-1.1234	-0.317047
HMMR	1.75719	1.74262e-05	0.000596182	-1.41385	0.34334	-0.451374	-1.53746	-0.69197	-1.55619	-2.01606	-2.23005	-0.0471794	1.75994	0.3746	-0.254276	0.410091	0.626487	-0.329677	0.360065	0.314637	1.2631	0.511738	0.979226	0.147025	-0.202064	0.89447	-1.31475
HN1	1.14341	3.41683e-05	0.000993354	-0.850279	0.293128	-0.641891	-0.929201	-0.88157	-0.881174	-0.67977	-1.08807	0.891167	-0.01581	0.918421	0.0134187	0.252415	0.510534	-0.144977	-0.219507	-0.013792	0.860168	0.316068	0.50615	0.851605	-0.223154	1.08814	-0.900805
HN1L	0.611829	0.00114368	0.0139392	-0.442069	0.16976	-0.622773	-0.510702	-0.345824	-0.450164	-0.52437	-0.198579	0.665247	1.09088	0.210091	-0.147584	-0.57003	-0.0900924	0.410935	-0.0555723	0.239558	0.363063	-0.140841	0.15607	-0.0046425	0.000286018	0.0144282	0.574367
HNRNPAB	1.34164	8.44041e-06	0.000339836	-1.20164	0.140002	-1.29005	-1.24001	-1.94112	-1.48489	-0.848455	-0.405328	-0.313749	-0.503701	-0.0121691	-0.129465	-0.843278	0.47502	0.79765	0.465788	0.315462	0.796951	0.710049	0.481559	-0.595496	0.362969	0.132223	0.100224
HOMER2	1.79623	6.06851e-06	0.000265991	-1.32326	0.472975	-1.40532	-1.244	-0.89614	-1.15888	-1.69085	-1.54437	1.05698	1.42114	0.477697	1.12682	1.41967	-0.258316	0.956329	0.196523	0.227791	0.385106	-0.217251	0.297215	-0.703672	0.110741	-0.733025	1.80384
HOOK1	0.658529	0.0279576	0.135638	-0.430408	0.228121	-0.812988	-1.09787	-0.578248	-0.423323	0.331724	-0.00173968	-0.0785052	0.19274	0.537489	-0.416059	-0.389704	-0.370386	0.80651	0.957571	0.567634	0.391294	-1.11897	0.396651	0.159127	1.0289	-0.281664	1.2673
HOXB7	1.12527	0.00851525	0.0595876	-0.834632	0.290639	-0.334248	-1.1078	-0.738431	-1.0867	-0.504036	-1.23657	-1.05659	1.34165	-0.395097	1.21826	-0.909436	0.570251	-1.14398	0.589317	0.680977	0.294696	0.60827	1.19159	-1.44033	1.28014	0.386215	1.4343
HPDL	1.15289	7.71339e-05	0.00185575	-0.801834	0.351055	-0.646217	-0.715196	-0.543033	-0.800365	-1.10046	-1.00574	0.131528	0.776917	0.829455	1.38382	-0.106125	-0.892315	1.06515	-0.0169396	0.537044	0.00604716	0.446024	0.762538	-0.115595	0.485834	-0.413384	0.736882
HPRT1	0.662646	0.00108149	0.0133899	-0.566849	0.0957967	-0.662977	-0.700854	-0.633044	-0.743266	-0.239954	-0.420999	0.363555	0.147946	-0.586685	0.0386197	-0.328173	0.236863	-0.1182	0.257377	0.521196	0.216085	0.2578	0.582461	0.391941	-0.873329	0.618093	-0.192803
HSP90AA1	0.964419	0.000810051	0.0109152	-0.938231	0.0261874	-1.40013	-1.32306	-1.69498	-1.33685	0.0960545	0.0295843	-0.0516439	0.0914642	-0.391639	-0.0321728	-0.511517	0.805468	0.213043	0.406421	0.397538	0.137255	0.0723304	0.167186	0.43857	-0.257132	-1.05116	-0.0150098
HSP90B1	0.722119	0.012907	0.0792569	-0.512443	0.209677	-0.585963	-1.10932	-0.600929	-0.642115	0.0321474	-0.168478	1.03992	-0.461685	0.401624	0.164007	-0.566885	-0.264251	0.557211	0.822697	0.955197	0.19268	-0.0764171	0.141585	-0.497269	0.599618	-0.889485	1.23627
HSPA4	0.752444	0.0016581	0.0182216	-0.542294	0.210151	-0.459735	-0.982478	-0.67977	-0.740844	0.0936363	-0.484574	0.534809	-0.78414	0.00239631	0.220834	-0.334248	0.43677	0.784604	0.376079	0.397272	1.05226	0.472129	0.773418	-0.175301	-0.0910184	-0.243603	-0.059851
HSPB1	0.900977	0.0452699	0.187294	-0.700403	0.200575	-1.47395	-0.817225	-1.47846	-0.932737	0.0486046	0.451349	-0.0205105	0.963711	-0.788517	-1.01274	0.290018	-0.219347	-1.8856	0.313994	1.09895	1.20589	1.34517	1.46153	1.10564	-0.650013	-0.555405	0.556425
HSPBP1	0.635071	0.0140745	0.0841236	-0.333822	0.301249	-0.597535	-0.472135	-0.520471	-0.46198	0.0339827	0.0152063	-0.646741	-0.535811	0.93138	1.00605	0.124062	-0.216265	0.0308279	0.934671	0.417763	1.02568	0.736882	0.204947	-0.420999	0.87257	0.425832	-0.0708506
HSPE1	1.22023	2.26987e-05	0.000727377	-0.918496	0.301734	-1.25462	-1.02342	-1.52963	-1.38734	-0.216795	-0.0991754	-0.238741	-0.266008	-0.452325	0.820117	-0.118532	0.0139498	0.928262	0.27956	0.601533	0.79319	0.912605	0.522469	0.626487	0.34929	-0.0105794	0.0664677
HSPE1-MOB4	1.09914	0.000312812	0.00536115	-0.798106	0.301034	-1.04748	-0.938874	-1.26166	-1.15757	-0.0869931	-0.296058	-0.800903	-0.0783481	-0.624261	1.12992	-0.203331	0.245926	0.997848	0.28855	0.498108	0.509048	0.463771	0.53891	0.774618	-0.193791	0.0330177	1.23746
HSPH1	0.614199	0.00246059	0.02434	-0.487008	0.127191	-0.609297	-0.809533	-0.551037	-0.48901	-0.0939966	-0.369173	0.236787	0.0989927	-0.0429718	0.120967	-0.154827	-0.485238	-0.347739	0.0265534	0.470965	-0.117043	0.502101	0.364525	0.800269	1.00996	-0.0142911	-0.433947
HYOU1	0.695784	0.000422311	0.00662267	-0.47959	0.216194	-0.533602	-0.394549	-0.595323	-0.533415	-0.39694	-0.42371	-0.0894251	-0.0929644	0.326941	0.231743	-0.491961	0.0818581	-0.373706	0.498791	0.525567	0.783445	0.430396	0.653137	0.0891625	-0.336877	0.403828	0.819174
IARS2	0.789131	0.0334214	0.153212	-0.782209	0.00692206	-0.951478	-0.983555	-1.73067	-1.31169	0.182351	0.101795	-0.107695	-0.390957	-0.809533	-1.93316	-0.417644	-0.862501	0.226823	0.370027	0.556425	0.670799	0.464215	1.055	0.0732446	0.302565	-0.0928968	1.00605
ICAM3	0.73463	0.0217896	0.114032	-0.448165	0.286465	-0.829637	-0.469514	-0.600126	-0.928707	0.154559	-0.0155634	0.352409	-0.544122	-0.551724	0.00612496	-0.450164	0.598072	0.718528	0.219668	1.76675	0.500982	0.906903	-0.0477645	0.758375	-0.759233	1.30894	-0.200302
IDH2	2.1072	5.47756e-06	0.00024748	-1.62282	0.484384	-1.2798	-1.65623	-1.74785	-1.91347	-1.57913	-1.56043	1.00171	1.84704	-0.0389496	0.91347	1.42341	0.690353	-1.17306	-0.293847	0.997329	0.938979	1.7179	0.105044	0.986469	-0.630211	0.0321181	-0.767607
IER2	0.828	0.00617165	0.0474966	-0.761612	0.0663876	-1.31169	-1.33685	-0.20525	0.05221	-1.39422	-0.373867	-0.671187	0.723008	-0.716853	0.487274	-0.607076	-0.318263	0.707419	0.134283	0.431332	0.0951486	1.00605	0.164007	0.373204	-0.0227931	0.266848	-0.990197
IER5L	0.696045	0.0386639	0.168975	-0.378135	0.317911	-0.733713	-0.666881	-0.456728	-0.308069	0.109652	-0.213069	0.490356	1.38382	-0.749809	0.633454	-0.17406	-0.570723	0.761055	0.122993	0.898942	0.95321	0.259983	0.223834	2.04685	0.0329474	-0.489647	-0.736632
IFI27	2.00992	0.00580012	0.0456037	-1.69254	0.317379	-1.64912	-1.92447	-1.96496	-2.48397	-0.106525	-2.02619	1.27316	-0.556499	-1.58606	1.02082	2.40924	0.57775	0.845514	0.229688	1.74	2.21752	1.49471	1.67565	-1.44521	-3.31756	0.199403	-1.70007
IGF2	1.03186	0.0460724	0.188947	-0.399326	0.632538	-0.493848	-0.367065	-0.269157	-0.49581	-0.575093	-0.194985	-0.175872	-0.659446	-0.725508	2.17377	-0.378412	0.216324	1.14234	1.2286	1.37874	-1.54437	1.24493	0.647591	3.33097	1.90335	-0.0552141	0.392819
IGF2BP2	0.761965	1.82998e-05	0.000615734	-0.495476	0.266489	-0.626228	-0.839249	-0.217075	-0.412943	-0.457964	-0.419397	0.338673	0.808926	0.586554	0.231918	0.112694	0.229688	0.624426	0.166202	0.504285	-0.204809	-0.0881833	-0.293127	0.277807	0.617563	0.00176439	0.349445
IKBIP	0.68955	0.0320896	0.148927	-0.296755	0.392796	-0.344676	-0.6995	-0.390699	-0.402794	0.45876	-0.401621	-0.442451	-0.0110972	-0.447959	-0.0487383	-0.397622	0.567967	0.150128	1.76985	1.46153	0.0698403	0.723891	1.28381	-0.477719	0.124266	1.01914	0.93989
IL1RAP	1.39765	0.0043896	0.0370742	-0.808733	0.588914	-0.847688	-1.19075	-0.750864	-0.834468	-0.327467	-0.901162	-0.858632	2.58181	-1.21027	0.476934	1.11004	0.566947	0.866544	0.901223	1.82455	0.0161046	-0.701061	-0.558194	2.13708	0.490017	-0.00975276	1.78929
IL27RA	0.602225	0.0216644	0.113506	-0.344995	0.257229	-0.202342	-0.575585	-0.285599	-0.338992	-0.116061	-0.551393	-0.411562	1.06447	0.277734	0.110219	-0.694156	-0.179329	0.67281	0.147132	0.950205	0.100076	0.24164	-0.0246011	-0.0472175	-0.500477	1.04947	1.35925
IL32	0.756262	0.0200802	0.107804	-0.31084	0.445422	-0.178724	0.0157633	-0.114673	-0.421317	-0.450897	-0.715196	1.23265	0.598382	-0.259714	1.27243	-0.103676	-0.0158673	-0.700854	-0.0342152	0.0491188	0.775522	0.484324	0.249874	1.11089	-0.51083	2.1051	0.873616
IL4I1	0.873681	0.00197448	0.0208266	-0.573452	0.300229	-0.156977	-0.46419	-0.350492	-0.616125	-0.816507	-1.03642	0.543406	0.60959	-0.196267	0.622851	0.898942	-0.855958	-0.750864	0.195738	-0.082513	1.14965	0.629873	0.354148	0.00129198	0.0368909	0.355167	1.29172
ILDR1	0.677514	0.000152851	0.00310312	-0.601673	0.0758409	-0.169188	-0.816507	-0.410084	-0.392523	-1.02752	-0.794219	0.118301	-0.087811	-0.286869	0.386506	-0.040507	0.273653	-0.557948	-0.0784743	0.0489889	-0.143425	0.46682	0.369398	-0.117318	0.0240012	0.176021	0.662116
ILF2	0.968493	0.00146768	0.016624	-0.818195	0.150298	-1.16641	-0.621388	-1.2275	-1.16014	-0.510189	-0.223543	-0.818564	-1.25337	0.699563	0.410091	-0.134709	-0.575585	0.111825	-0.0161766	0.252796	0.681204	0.36852	0.85078	0.192216	1.22579	0.0225071	0.387878
IMMP1L	0.669194	0.0401283	0.173168	-0.322884	0.34631	-0.504914	-0.501012	-0.524893	-0.429846	-0.02501	0.0483734	-0.808676	1.03749	-0.010328	0.758804	-0.24052	-0.878822	1.49121	-0.105968	1.21258	1.51747	0.656016	0.923276	-0.282714	0.406981	-0.195928	0.0600955
IMP4	0.72852	0.00209043	0.0216872	-0.505246	0.223275	-0.706593	-0.745281	-0.483232	-0.82453	-0.248428	-0.0234095	-0.0169886	0.429226	-0.307597	0.149684	-0.302673	0.42834	-0.144248	0.164129	0.443921	0.303131	1.06036	0.82234	0.133356	-0.681468	1.10169	-0.010807
INHBB	1.64418	0.00861867	0.0599378	-0.606784	1.0374	-0.615812	-0.898908	-0.0592169	-0.643155	-0.771783	-0.651832	1.40204	2.34396	-0.473382	2.27155	1.99528	3.22064	1.2229	1.73187	2.95939	-1.37915	-0.649351	1.04777	-0.281136	0.226768	-1.04988	2.00911
INPPL1	0.758647	0.00429787	0.0364881	-0.524074	0.234572	-0.605709	-0.902418	-0.940715	-0.669474	-0.0482782	0.0221479	-0.193098	0.158541	-0.08336	1.61502	-0.165779	0.445518	0.34114	0.59301	0.843346	0.439751	0.293513	0.259145	0.595065	-0.45056	-0.538541	-0.39955
IPO4	0.664798	0.0101577	0.0669189	-0.423039	0.241759	-0.614229	-0.6178	-0.579574	-0.493008	-0.0823544	-0.15127	0.191068	-0.965953	-0.0920698	1.18308	0.256028	-0.374281	-0.0894251	0.263176	0.884398	0.846405	1.00322	0.490555	-0.189325	-0.240332	0.0177437	0.683856
IQCD	0.771298	0.0192167	0.104561	-0.435546	0.335753	-0.180908	-0.421553	-0.28087	-0.377044	-0.675126	-0.677773	2.27155	0.320013	0.0135771	-0.333415	0.00342607	-0.732734	0.511444	-0.00588793	1.50534	-0.00273919	0.0221479	0.982486	0.842305	-0.0550136	-0.503153	0.532702
IRAK1	0.643429	0.00700061	0.0519539	-0.455038	0.188391	-0.573936	-0.61057	-0.471163	-0.575585	-0.146773	-0.352202	0.878917	0.82829	-0.488712	0.356143	0.589152	0.565283	0.145802	-0.0763144	0.375644	-0.118371	0.28855	0.340607	-0.14909	-0.839683	0.925816	-0.607783
IRF2BPL	0.715391	0.00639316	0.0486773	-0.60888	0.106511	-0.883626	-0.868666	-1.21582	-0.974547	0.0657528	0.223627	0.56927	-0.100468	0.255749	0.463771	-0.133382	0.585272	0.982486	0.41111	0.364921	0.265259	-0.0418173	-0.200629	-0.18803	0.119954	-0.848918	-0.800365
IRF6	0.772887	4.96431e-05	0.00133241	-0.573958	0.19893	-0.502441	-0.774829	-0.499001	-0.501416	-1.1078	-0.0582543	0.122185	-0.13555	-0.167931	0.311916	-0.1527	0.0826218	-0.199918	0.370603	-0.0803764	0.0333588	0.285566	0.484421	0.1769	0.769085	0.5838	0.698894
ISG15	1.97236	0.00881983	0.0608191	-0.925675	1.04668	-0.850808	-0.85429	-1.19855	-1.39806	-0.148456	-1.10389	-0.0871896	-0.709018	-0.173534	2.30639	4.27995	1.49701	0.918078	0.710726	2.2447	2.26658	3.55598	1.18497	-0.782824	-2.59456	2.05648	0.0731708
ITGA6	0.738017	0.00695162	0.0517246	-0.466564	0.271453	-0.183311	-0.394755	-0.514834	-0.500477	-0.325784	-0.880224	-0.23074	-0.596396	-0.592611	1.2847	-0.373101	0.0753529	0.998404	0.206783	0.0464046	0.000195885	0.318603	0.12992	1.12682	1.20166	0.571265	0.175989
ITGB6	0.67072	0.0170853	0.0957181	-0.398515	0.272204	-0.30854	-0.624056	0.258907	-0.255758	-0.703203	-0.758442	0.607351	0.896473	-0.0344493	0.721742	0.504183	1.29483	-0.449145	-0.22594	-0.245601	0.241019	0.257426	-0.652615	0.878213	-0.497269	1.19159	-0.132535
ITGB8	0.998269	0.025978	0.128431	-0.55925	0.439019	-0.867241	-1.0525	-0.115487	-0.62294	0.220734	-0.918066	0.57111	2.95939	0.0949303	0.898419	-0.247515	1.64872	0.745666	0.95559	1.87539	-0.0675575	-0.795662	-0.294537	0.00740033	-0.421553	-0.623628	-0.281863
JADE3	1.14435	6.83034e-05	0.00168949	-0.79684	0.347511	-0.941869	-0.799076	-0.732375	-1.00756	-0.938874	-0.361289	0.719001	0.571397	-0.122885	0.985956	-0.11674	0.431332	0.924922	0.00474009	0.623247	0.991008	0.012983	1.05572	-0.404309	0.786927	-0.869104	-0.0340126
JAG2	0.88977	0.000594625	0.00867667	-0.553596	0.336174	-0.453252	-0.577869	-0.439282	-0.518191	-0.841859	-0.491121	-0.0975573	-0.258035	-0.225246	0.63424	-0.61406	1.5389	0.873616	0.503612	0.757297	0.790103	0.604459	0.0644442	-0.0589457	-0.12186	0.381995	0.605817
JTB	0.705206	0.00376791	0.0329674	-0.581405	0.1238	-1.09472	-0.851616	-1.18101	-0.972764	0.225077	0.386598	-0.150349	0.0514321	-0.125225	0.658324	-0.492628	-0.374492	0.215324	0.371413	0.462913	0.489908	0.611846	0.510997	-0.232445	-0.203793	0.246021	-0.058441
JUN	0.916166	0.00472997	0.0391682	-0.753745	0.162421	-1.11024	-1.14841	-0.0243377	0.241685	-1.38481	-1.09636	-0.609297	0.853119	0.283952	-0.597535	1.25711	0.297918	0.68167	0.89544	0.512911	-0.21231	0.357937	-0.166398	-0.975384	0.523121	-0.0653047	-0.438211
JUP	1.40982	9.50123e-06	0.000373519	-0.988866	0.420952	-1.09636	-0.907614	-0.659264	-0.881942	-1.33685	-1.05116	0.461117	1.23965	0.160615	0.958274	-0.496491	0.638723	-0.618818	0.679401	0.0113659	0.539966	0.136876	0.461389	0.804396	1.18158	1.16928	-0.592096
KB-431C1.4	1.21743	0.00724036	0.0532233	-0.934923	0.282511	-0.758862	-1.64586	-1.32306	-1.34885	0.181266	-0.71416	-0.633687	-0.333085	-1.40532	1.09166	1.38764	1.2631	1.04248	0.456514	0.331106	0.231546	1.91885	0.818047	0.669548	-1.36828	-0.627275	-0.322671
KCNH2	0.641189	0.0114871	0.0730001	-0.272661	0.368527	-0.384651	-0.146395	-0.188453	-0.222369	-0.249913	-0.444189	0.183016	1.55458	1.25808	0.490923	0.119684	-0.20066	0.460517	-0.0461109	0.474371	0.208047	1.05016	0.707824	-0.309127	-0.256397	-0.469265	0.670799
KCNS3	1.60607	0.000727039	0.0100707	-1.07052	0.535555	-0.962549	-1.22894	-0.9177	-1.16934	-1.05419	-1.09039	-0.296273	-0.695125	1.31581	1.53568	-0.345312	2.38987	0.957571	0.161286	-1.12466	0.388471	1.23045	0.991996	-1.19855	1.48608	1.41792	0.353675
KCTD1	0.868273	0.0123651	0.0768639	-0.431947	0.436326	-0.530951	-0.401047	-0.0805006	-0.417378	-0.729946	-0.431858	-0.227223	-0.0727006	-0.0103593	1.58074	-0.147849	-0.621111	1.91513	0.154415	0.648313	0.27605	0.190204	0.225996	0.963711	2.13079	-0.101454	0.0765612
KDF1	0.695102	0.00309869	0.0287969	-0.50668	0.188422	-0.796634	-0.691725	-0.599553	-0.480333	-0.581965	0.110132	-0.639668	0.699563	-0.164405	0.608784	-0.486382	-0.182569	0.0321181	0.494223	0.696393	0.353282	0.866838	0.79119	-0.0392068	0.00311531	0.423819	-0.442341
KDM2B	0.599686	0.00775206	0.0557759	-0.483155	0.116531	-0.47047	-0.795662	-0.86758	-0.90967	0.0442621	0.100191	-0.138212	-0.459159	0.490099	-0.128867	-0.319543	0.137885	0.482702	0.605145	0.860168	0.30752	-0.429251	0.225544	-0.624261	0.604012	-0.00105213	0.251762
KEAP1	0.811524	0.00596809	0.0463982	-0.506469	0.305055	-0.467958	-0.68061	-0.960019	-0.85429	-0.143981	0.0680426	-0.4019	-0.153564	-0.361289	-0.344115	-0.88157	0.433616	0.929687	0.53281	1.50121	0.826853	0.778323	-0.0560415	0.520001	0.898942	0.5942	0.0637085
KIAA0101	1.36344	2.43546e-06	0.000127806	-1.32374	0.0397029	-0.896577	-1.64119	-0.900319	-1.46393	-1.54437	-1.49604	0.0827998	-1.24281	-0.152033	-0.745281	0.709057	-0.228411	0.317317	0.415635	0.324264	0.257657	0.531867	-0.303791	0.45127	-0.323262	0.261272	0.2797
KIAA1524	0.768784	0.00731192	0.0535692	-0.523365	0.245419	-0.387594	-0.930932	-0.515832	-0.135476	-0.193993	-0.976364	-0.662747	-0.5382	0.512911	0.0755483	0.723008	-0.332825	0.540113	0.177478	0.148584	0.472599	-0.0323134	-0.112323	0.143964	1.73759	1.24263	-0.169316
KIAA1804	1.35008	0.000387824	0.00624449	-1.00763	0.342446	-1.4762	-1.28764	-1.57549	-0.948732	-0.696204	-0.0615385	1.99042	0.269328	-0.411718	0.0740182	-0.650242	0.58492	0.750663	1.43601	0.950542	-0.0178429	0.661044	-0.0292351	-1.0314	0.65858	0.250095	-0.00603752
KIF11	2.70795	8.25739e-09	1.43128e-06	-2.4311	0.276848	-1.82501	-3.08491	-1.68291	-2.90813	-2.06915	-3.01653	-0.626934	0.547626	0.974157	-0.821256	-0.143071	0.461619	0.873226	0.342307	0.599054	0.941912	0.0488287	-0.289634	0.622851	1.40053	0.473738	-0.975384
KIF14	1.95914	2.7247e-07	2.25873e-05	-1.68705	0.272088	-0.946143	-1.73562	-1.50503	-1.72428	-1.96496	-2.24627	-0.548301	0.879667	0.429511	-0.78773	-0.0182935	-0.749809	0.626984	0.514929	0.630518	1.23516	0.206844	0.0188906	0.403591	1.31302	0.532602	-0.334175
KIF15	2.27576	1.52263e-06	8.90992e-05	-2.03616	0.239599	-1.49146	-1.84577	-2.49911	-2.2209	-1.70007	-2.45963	-0.900319	0.376803	1.09895	-1.09875	0.5481	-0.714346	1.27892	0.0570669	0.231743	1.59245	0.729483	0.0426787	-0.181107	1.2673	0.633454	-1.12884
KIF18A	1.54524	1.82229e-05	0.000615734	-1.38064	0.164604	-1.08344	-1.45232	-0.963449	-1.53504	-1.52963	-1.71994	-0.848174	0.831408	0.0644442	0.010017	0.69485	-1.2151	0.29284	-0.698601	0.720353	1.27083	0.612744	0.444209	0.0172719	-0.496393	1.00274	-0.0697744
KIF18B	1.58802	3.97937e-05	0.00112823	-1.15865	0.429377	-0.778057	-1.41317	-0.392749	-1.42446	-1.26053	-1.68291	-0.363899	0.382618	1.38991	0.0300788	-0.0807083	-0.509105	0.239195	0.267514	0.727946	1.61163	0.255093	-0.361496	1.64241	1.09285	1.0833	-0.537295
KIF1A	0.73864	0.00719159	0.0529931	-0.4158	0.32284	-0.347519	-0.357455	-0.162397	-0.313354	-0.520239	-0.793835	-0.367781	1.37874	1.14488	0.329846	0.631527	-0.508039	0.985036	0.431219	0.70591	0.284458	-0.271194	0.17574	-0.486007	0.715507	-0.579165	0.594771
KIF20A	2.28635	6.96844e-08	7.7397e-06	-1.96723	0.319122	-1.51342	-2.30142	-1.79876	-2.26904	-1.97364	-1.94711	-0.616947	0.168007	1.26232	0.403192	-0.276247	0.747281	0.637854	0.966741	0.132481	1.44502	1.37612	0.323885	-0.341961	-0.136785	0.0598033	-1.04481
KIF20B	1.04299	0.000144385	0.00297081	-0.952773	0.0902199	-1.02141	-1.26667	-0.708834	-0.770281	-0.790563	-1.15888	-0.694695	0.910816	0.274877	-0.708167	0.097936	0.00727188	0.284817	0.459668	0.352	0.601739	-0.120791	-0.0206521	0.297505	0.549412	0.404366	-1.25259
KIF22	0.654526	0.000260724	0.00466774	-0.427543	0.226984	-0.586685	-0.620188	-0.441645	-0.59621	-0.322355	0.00182806	0.395943	0.355072	0.497538	-0.31722	0.0454671	-0.0925433	0.300441	0.48287	0.492796	0.82187	0.275588	0.244072	-0.217308	-0.273921	0.6391	-0.018027
KIF23	1.33084	1.04973e-05	0.000402982	-1.17236	0.158482	-0.985868	-1.40532	-0.299615	-1.29791	-1.31475	-1.73067	0.220607	0.57665	0.609439	-1.07662	0.387551	0.34447	0.348405	0.286589	0.324531	0.422922	0.518583	-1.0105	0.0643294	-0.0415653	0.724211	-0.1639
KIF2A	0.946913	6.34463e-06	0.000274934	-0.673857	0.273056	-0.873813	-0.747171	-0.517283	-0.690191	-0.526177	-0.688504	-0.331711	0.0197278	-0.123524	0.129063	0.383328	-0.193993	0.256578	0.492118	0.606268	0.828679	0.447899	0.976999	0.0590078	0.147025	-0.086944	0.758375
KIF2C	1.29036	1.99753e-05	0.000663331	-1.08544	0.20492	-0.581371	-0.948179	-0.473898	-0.829637	-1.821	-1.85858	-0.583434	0.18815	1.29052	-0.047867	-0.111539	-0.414352	0.176078	-0.450775	0.242436	0.617168	0.200557	0.0470408	0.863259	0.56745	0.544049	0.149975
KIF4A	2.11241	2.38615e-07	2.02955e-05	-1.88658	0.225831	-0.682671	-2.33094	-1.97364	-1.87957	-2.35209	-2.1006	-0.064603	0.492533	1.54935	0.172785	0.0477675	-0.424877	0.155777	0.0772652	0.941098	0.803846	0.648081	0.316527	-0.49413	-0.363728	0.814962	-1.05936
KLF5	0.920887	0.00643231	0.0488616	-0.665582	0.255304	-1.21964	-1.25337	-0.746042	-0.401142	-0.0714472	-0.301849	-0.469633	-0.145132	0.110785	0.265074	-0.592788	0.750663	1.32438	0.232282	-0.011029	1.04651	-1.20923	0.330615	0.552649	1.36121	-0.410175	0.948674
KLHDC3	0.643254	0.0472711	0.192141	-0.322379	0.320875	-0.149825	-0.29199	-0.590204	-0.442164	-0.437187	-0.0229009	-0.215244	-0.452662	2.15829	-0.336243	-0.853057	-0.0136673	1.14682	0.14153	0.216028	0.384403	0.202698	0.0832108	0.459037	1.49701	-0.135271	0.851127
KLHDC9	0.9983	0.00319	0.0293593	-0.607551	0.390749	-0.903508	-0.331562	-0.538541	-0.685916	-0.942958	-0.24282	1.25063	0.114861	-0.0662031	0.83426	-0.0153468	-0.604827	-0.0563726	0.133031	0.100866	1.51547	0.229993	1.48216	1.47231	0.872176	-0.843278	-0.167748
KLHL14	1.6045	1.43547e-06	8.50868e-05	-1.36997	0.234534	-1.32919	-1.3635	-0.646741	-1.33334	-1.75771	-1.78934	-0.199674	-0.164193	0.863259	0.628033	-0.0777987	-0.387194	0.676813	0.340824	0.671217	0.57046	0.0790367	0.231627	1.07074	0.626487	-1.26053	0.0834337
KLHL24	0.937427	0.0407263	0.174832	-0.632442	0.304985	-0.591097	-1.06077	-0.975384	-1.02204	-0.0581198	-0.087233	-1.64586	-0.942598	-0.388224	2.02058	0.503971	-0.276532	2.26658	0.680377	0.624241	0.218886	0.45393	0.267314	0.0633764	1.54413	-1.18744	0.677024
KLHL26	0.625253	0.00296929	0.0279997	-0.475597	0.149656	0.0923223	-0.69602	-0.475738	-0.538077	-1.06288	-0.173188	-0.615078	0.0655675	0.270929	-0.0626251	0.00357265	-0.0620156	-0.222264	0.465314	0.710995	0.352095	0.175953	0.427824	0.563181	-0.331415	-0.210803	0.863259
KLK5	1.15928	0.0399995	0.172808	-0.557131	0.602148	-0.734008	-0.668101	-0.639483	-0.44406	-0.487313	-0.369822	0.662336	1.51222	-0.427037	-0.474547	2.86636	2.58181	-1.24281	1.78036	0.812168	0.730803	1.48608	-0.931554	0.488903	1.07675	-2.13081	0.843346
KLK6	3.40043	5.91822e-06	0.000261913	-2.66361	0.736818	-2.41349	-2.31781	-3.1631	-2.03562	-3.24586	-2.80576	1.38847	2.77124	-1.63538	2.01319	2.5142	-0.319886	-0.671892	0.580198	0.680771	2.88563	0.945099	1.98091	0.469357	-0.410413	-1.77525	0.372839
KLK7	2.56434	4.58333e-05	0.00125589	-2.05786	0.506476	-2.0818	-2.02619	-3.01653	-2.06915	-1.44915	-1.70436	0.0390941	1.50534	-1.31475	1.80384	0.888209	1.81829	0.322176	0.80215	0.323154	1.88995	2.25025	1.38496	-0.587743	-1.30232	-1.90582	0.186823
KLK8	0.837867	0.00028829	0.00503902	-0.650242	0.187625	-0.470941	-0.753734	-0.630211	-0.738996	-0.602653	-0.704919	0.138351	0.221197	-0.457751	0.668677	1.00695	0.13105	0.0541558	0.201827	-0.112288	0.944327	0.692348	0.477034	0.253382	-0.254676	-0.642506	-0.320083
KNSTRN	1.16944	0.000164853	0.00329995	-0.872775	0.296661	-0.373941	-0.791479	-0.173188	-1.30816	-1.10314	-1.48673	0.274182	-0.239589	1.79292	-0.132846	1.06515	0.120967	0.106763	-0.55069	0.528875	0.664564	0.434989	-0.34685	0.608405	0.150178	0.456441	-0.186889
KNTC1	0.913745	0.00334866	0.0304037	-0.607227	0.306518	-0.823882	-0.88236	-0.46408	-0.782563	0.0117206	-0.702194	-0.693933	0.590644	1.12763	-1.25099	-0.0738889	0.536014	0.100528	1.19529	0.455001	0.765347	0.186297	-0.166492	-0.333297	0.905598	0.856985	0.703556
KPNA2	1.53354	1.27509e-05	0.00046676	-1.33302	0.200517	-1.0867	-1.69498	-1.69085	-1.75285	-0.607478	-1.16528	-0.710141	0.7377	0.505026	0.703556	-0.129706	0.530512	0.644322	-0.678701	0.176351	0.980202	0.525665	0.075501	0.948674	-0.246665	0.404557	-1.25858
KPNA4	0.62971	0.0010995	0.0135469	-0.434445	0.195265	-0.59333	-0.519154	-0.474031	-0.656885	-0.117318	-0.245954	-0.576662	0.0477939	-0.0158754	1.05755	-0.247971	0.255418	-0.259881	0.576512	0.54394	0.0662629	0.506366	0.223459	0.19384	0.0923491	0.546666	0.114473
KRAS	0.733406	3.70133e-05	0.00106257	-0.52726	0.206147	-0.412849	-0.768146	-0.535245	-0.606753	-0.267177	-0.573387	-0.130182	0.519712	0.0883702	0.58637	-0.214137	-0.197335	0.377057	0.0267595	0.548879	0.158381	-0.398341	0.640684	0.546449	0.265074	0.0607895	0.419819
KRT14	1.44806	0.0273346	0.133436	-0.488733	0.959325	-0.276652	-0.245601	-0.291047	-0.353579	-0.9088	-0.856718	5.32145	0.0191324	0.72274	1.00222	3.08443	0.352095	-0.358768	2.7439	-0.0642976	1.12846	-0.608241	1.58252	-0.0855126	-0.105968	0.139666	0.475386
KRT23	2.1104	0.0149979	0.0878075	-1.08984	1.02056	-0.898156	-1.35457	-0.126529	-0.963449	-1.36512	-1.83121	3.77456	3.25794	-1.31662	3.16628	3.42291	0.677489	-2.36839	1.31302	-1.0342	1.30223	-1.17395	3.09569	1.72672	-1.57549	0.195868	1.86495
KRT8	0.97814	0.0101487	0.066889	-0.855664	0.122476	-1.44521	-1.44723	-1.39169	-0.703203	0.249874	-0.396522	0.227304	0.504914	-0.10636	-0.840783	0.109808	-0.65128	-1.53246	1.15302	0.434458	1.03489	0.235878	1.19959	-0.247652	1.10564	0.0228332	-0.690191
KRT86	0.95269	0.000963821	0.0123095	-0.722287	0.230404	-0.884572	-0.581965	-0.402368	-0.205671	-1.25858	-1.00057	0.748262	0.891908	-0.285249	-0.0981784	0.0815022	0.898942	-0.935557	0.414608	0.67426	0.00822795	-0.280981	-0.745479	0.164952	0.710995	0.974984	0.46326
KRTCAP3	1.50732	0.00146982	0.0166318	-1.0268	0.480522	-2.02619	-1.01866	-1.0455	-1.14036	-0.890443	-0.0396627	2.5142	0.00266986	-0.0977058	0.82045	-0.106871	1.08055	-0.226431	0.46326	1.10105	0.720609	2.45558	0.127153	0.046961	0.53372	-1.46393	-0.282897
L1CAM	0.924537	0.0143739	0.0851786	-0.214049	0.710488	0.185252	-0.209362	0.0204321	-0.205206	-0.776837	-0.298573	0.652945	1.96152	-0.248262	0.79765	0.783764	0.580468	-0.0489476	0.462517	2.05648	-0.0762826	-0.158643	1.29919	0.0323434	0.715787	2.6051	-0.0478207
LACTB2	1.26293	0.00283936	0.0270883	-0.730221	0.532714	-0.624404	-1.31662	-0.695365	-0.955569	0.0262231	-0.815589	-0.347739	0.145123	0.122993	0.458889	0.14488	3.33097	0.0680057	0.769085	1.15391	1.75994	0.499269	0.805468	-0.271267	0.0226958	-0.0542826	-0.0845164
LAGE3	0.76383	0.0169183	0.0951037	-0.521188	0.242642	-0.843278	-0.540663	-0.485458	-0.755027	-0.658451	0.15575	0.119977	1.51377	-0.459875	-0.179219	1.17021	-0.250587	-0.471621	0.142869	0.194315	0.82631	0.490216	0.837282	0.939427	-0.35659	0.599993	-1.2342
LAMA5	0.729176	0.021619	0.113366	-0.563309	0.165867	-1.31662	-1.16446	-0.755027	-0.755561	0.191988	0.419819	0.10091	-0.216396	-0.063379	0.203082	-1.01709	-0.0170703	-0.100499	1.51547	0.921685	0.745666	0.0096505	1.11906	-0.367172	0.177967	-0.199488	-0.158527
LAMC1	1.05569	0.00162907	0.0180201	-0.550328	0.505363	-1.01866	-0.686175	-0.846879	-0.778736	0.174173	-0.145689	-0.154016	0.0327777	-0.256845	0.685995	-0.0992606	-0.215761	1.01326	0.709057	0.0215629	1.15606	0.000126685	1.70203	1.46721	0.597191	-0.162125	1.58854
LAMP3	1.93188	0.00651525	0.0493066	-0.861734	1.07015	-0.721575	-0.645842	-0.339785	-1.17499	-0.869594	-1.41862	1.84704	0.0104633	-1.03789	2.7588	3.52174	-0.853403	0.561881	1.3033	0.892426	0.872901	4.02006	0.917203	-0.215162	-0.901623	3.48082	-0.0562285
LAMTOR5-AS1	0.738758	0.00711465	0.0525955	-0.472258	0.2665	-0.316949	-0.473806	-0.377128	-0.447144	-0.950414	-0.268106	0.056806	0.94975	0.591745	0.684218	1.05622	-0.254217	-0.641334	-0.698832	0.0720667	0.342221	0.382965	1.23516	0.938509	-0.10381	-0.508125	0.160661
LAPTM4B	1.37237	0.000894928	0.0117556	-1.03638	0.335992	-1.41862	-0.965489	-1.77196	-1.31823	-0.536684	-0.207301	-0.380281	-0.6864	-0.474803	1.04327	0.416828	1.21258	1.18497	-0.0713079	0.0523908	0.677652	0.506704	0.606268	1.81404	0.752873	-1.62821	0.34929
LBR	0.838776	0.00719608	0.0530091	-0.516008	0.322768	-0.266218	-1.12551	-0.622365	-1.07512	0.153873	-0.160708	0.489582	0.670276	1.25063	-0.724888	-0.196331	-0.245348	0.638022	0.454397	0.437508	0.885752	-0.0467951	-0.43128	-0.303849	1.76675	0.480389	0.0394769
LCLAT1	1.15295	9.45584e-05	0.00217437	-0.964515	0.188431	-1.62119	-1.14752	-1.33685	-1.23773	-0.178316	-0.265486	0.680377	-0.235096	-0.00616874	0.182701	-0.0797116	-0.610307	0.137324	0.569706	0.91347	0.555684	0.382229	0.268836	-0.570723	1.11906	-0.450317	0.157836
LCN2	2.25274	0.011548	0.0731499	-1.11612	1.13662	-1.52674	-1.76727	1.27725	-1.69498	-1.48489	-1.50009	2.79614	5.63047	-0.865201	-0.573936	0.647591	3.00614	-1.28866	-0.7541	0.821328	2.48827	3.08443	2.5142	0.637264	-1.28593	1.79816	-0.470253
LDHA	0.659125	0.0173841	0.0968698	-0.684176	-0.025051	-0.731536	-1.05889	-1.36213	-1.20284	0.201286	0.0490533	0.406027	0.499269	-1.15888	-0.0543959	-0.434901	-0.181889	0.692348	-0.186833	0.387482	0.239893	0.371501	0.360329	-0.387012	-0.997164	0.00272777	0.0406826
LDHB	0.700987	0.00486498	0.0398392	-0.745832	-0.0448452	-1.00057	-0.898558	-1.53246	-1.32012	0.0945507	0.182166	0.00517394	-0.278595	0.114258	0.276685	-0.410577	-1.06015	0.421576	-0.00877536	0.0261486	-0.0410524	0.0960545	0.0016645	-0.199429	0.608087	-0.344718	0.0761282
LEMD1	1.76701	0.0275412	0.134121	-1.02574	0.741265	-0.6132	-0.889485	-0.670015	-1.24001	-1.62466	-1.11708	0.648313	2.65575	0.3266	2.18652	-0.139447	-1.16641	-1.66313	-1.53746	0.297784	-2.73095	0.0468112	3.24529	3.25794	2.58181	0.860168	2.99065
LEPREL4	0.662594	0.0168891	0.0950141	-0.356299	0.306295	-0.587584	-0.486569	-0.445362	-0.719383	0.0988486	0.00225434	-0.100383	0.0506245	0.502333	0.809572	-0.211025	-0.877493	-0.0171092	0.715507	1.11505	1.30008	0.934174	-0.00157941	-0.367708	0.220287	0.996575	-0.168182
LGR6	2.12996	0.000321665	0.00543954	-1.70976	0.420202	-0.966399	-1.67464	-2.0818	-1.44521	-1.87957	-2.21093	1.53568	0.636382	-0.321771	0.339778	0.415213	1.90335	-0.578409	1.81164	0.853381	0.155521	-1.67464	0.617772	-0.530951	1.36884	-2.16936	2.3608
LGSN	1.45556	0.0142634	0.0848345	-0.129414	1.32615	-0.169316	0.0858483	-0.141788	-0.0693599	-0.273072	-0.208798	-0.0850397	-0.148507	2.09978	0.786629	-0.14809	0.310531	-0.192625	3.02532	2.54737	2.20923	1.72672	-0.184124	3.22064	2.93633	-0.0520859	3.16628
LIMS3	3.33514	1.77745e-06	0.000100663	-2.78612	0.549013	-2.9562	-2.77232	-3.31756	-2.54815	-2.83635	-2.28616	0.100562	-0.0156973	-0.0800931	2.39954	-0.103783	-1.13935	2.46683	-0.255299	0.263176	1.51377	0.518827	2.69153	1.67024	0.312573	-2.21093	0.652326
LIMS3-LOC440895	1.70863	0.0014411	0.0163708	-1.16524	0.543392	-1.22249	-1.55335	-0.495916	-1.44723	-1.37915	-0.893283	1.52029	-0.676798	-0.670015	1.51547	-0.589148	0.331106	2.55646	0.413032	-0.016709	0.485908	0.111041	1.57827	0.898942	0.575851	-1.795	2.45558
LINC00176	1.23479	0.0240633	0.122107	-0.528943	0.705844	-0.564985	-0.255966	-0.297631	-0.358693	-0.995811	-0.700573	0.376183	-0.580505	-0.0693599	2.16538	3.59632	-0.755027	0.747705	0.483501	-0.218298	3.24529	0.439619	0.450158	1.65655	0.0936138	-0.316202	-0.0214289
LINC00511	1.23771	3.58357e-05	0.00103395	-0.870995	0.366711	-0.730216	-0.595977	-0.725231	-0.929201	-1.08429	-1.16106	1.09462	0.716169	0.564593	0.833294	1.07573	0.427951	-0.141019	-0.103927	-0.58859	1.24493	0.739673	0.332359	0.0992015	-0.618818	0.540113	-0.3489
LINC00888	1.03422	0.00345121	0.0310281	-0.68788	0.346343	-0.489389	-0.326598	-0.371381	-1.19474	-1.06838	-0.676798	0.174727	-0.638471	0.703054	0.039385	-0.0764171	-1.04352	-0.690403	0.757844	0.593876	0.258984	-0.161794	1.63209	0.690552	1.76985	0.694132	0.837588
LINC01139	1.46496	8.75551e-05	0.00205042	-1.10376	0.361206	-1.62821	-1.03572	-0.837518	-1.17698	-0.532907	-1.41122	0.813984	0.451349	-0.974547	-0.360514	-0.132696	-1.07512	0.95321	1.12093	-0.0744666	0.829882	0.638022	0.510072	1.34707	1.40714	0.172484	0.152494
LINC01215	1.20865	0.0208567	0.110727	-0.428147	0.780507	-0.339502	-0.574059	-0.238216	-0.304848	-0.396014	-0.716243	2.40924	0.727046	0.17151	1.08489	-0.151345	0.260743	-0.464652	0.283813	-0.613617	0.0415739	2.2447	3.67957	1.96152	-0.165922	-0.398886	1.41792
LINGO1	1.06078	0.0154552	0.0895486	-0.449857	0.610927	-0.4976	-0.669764	-0.572246	-0.35518	-0.269077	-0.335278	-0.309753	-0.653082	-0.119847	1.87851	3.04591	0.0626677	2.06835	0.377244	1.19068	0.490555	0.309833	0.480614	-0.619016	0.714321	-0.250934	1.10879
LIPG	1.14296	0.0180428	0.0997201	-0.301185	0.841779	-0.416889	-0.479697	0.184172	-0.398039	-0.167702	-0.528952	2.39954	-0.408139	0.329702	1.18403	0.519832	-0.184168	1.21356	-0.495062	1.57633	3.42291	1.11419	-0.142482	-0.156614	1.16863	2.09978	-0.173576
LIX1	1.36804	0.0309615	0.145283	-0.556749	0.811289	-0.30746	-0.515562	-0.350259	-0.298947	-0.883626	-0.98464	1.29483	2.15125	1.2046	0.513872	2.04685	2.90982	1.52029	2.38987	-0.565389	-1.00909	-0.149689	-1.44278	0.762201	3.24529	-1.01934	-0.871951
LL22NC03-N14H11.1	0.989523	0.0117205	0.0740176	-0.464883	0.524641	-0.288583	-0.749602	-0.234963	-0.401962	-0.00851359	-1.10567	-0.110499	-0.324218	0.269404	0.696089	1.56188	0.129578	1.96559	-0.528267	0.41432	0.243565	-0.719149	0.445935	0.969208	1.84152	-0.370008	1.90931
LLGL2	0.653582	0.000633408	0.0091147	-0.437411	0.216172	-0.413266	-0.57903	-0.407534	-0.556774	-0.409108	-0.258753	-0.0129987	0.013181	-0.383302	0.49536	-0.28887	0.97574	0.421139	0.0163071	0.353282	0.926155	0.232976	0.138201	0.38915	-0.227866	0.494704	-0.0844148
LMNB1	1.85005	0.000119534	0.00259975	-1.69555	0.154498	-1.38481	-1.96496	-1.84143	-2.13081	-0.835251	-2.01606	-0.39949	-0.982478	0.648081	0.229342	-2.41349	0.73513	1.53568	0.843005	0.231362	0.909322	0.0317024	0.237221	0.607753	1.2879	-0.884088	-0.144977
LMNB2	1.28752	5.76667e-05	0.00148918	-0.893891	0.393634	-1.12466	-1.03275	-0.848918	-0.694156	-1.06915	-0.593707	0.508578	-0.399723	0.937215	-0.061333	-0.406787	-0.309541	1.93633	0.569572	0.843723	0.989461	0.396342	-0.174893	-0.0205987	0.474371	1.02025	-0.00481897
LOC100129098	1.14598	0.00638138	0.0486317	-0.757299	0.388676	-0.25567	-0.418987	-0.181927	-0.300754	-1.61121	-1.77525	1.59576	0.553262	1.03297	0.590822	0.180987	-0.0115354	0.995924	1.91885	0.00140013	-1.23296	-1.21964	0.335654	-0.140388	0.606673	-0.195638	1.20666
LOC100287525	0.664283	0.00229719	0.0231438	-0.439169	0.225114	-0.31389	-0.461188	-0.201203	-0.445984	-0.483974	-0.728775	0.0482841	1.07074	0.312573	0.757844	1.10105	0.18372	-0.590896	-0.233583	-0.02542	-0.143029	0.00372737	0.152532	0.264878	-0.242494	0.566947	0.374953
LOC100288570	0.756752	0.000175816	0.00344111	-0.584234	0.172519	-0.696454	-0.392338	-0.378084	-0.727275	-0.852477	-0.458774	-0.0281996	-0.00633632	-0.00176854	0.270747	-0.153175	0.969867	0.328322	0.0306555	-0.155327	0.417302	0.0245802	0.5942	0.585425	-0.323594	-0.478959	0.686561
LOC100289092	0.634101	0.00408023	0.0350172	-0.453489	0.180612	-0.600126	-0.518191	-0.431625	-0.298444	-0.552734	-0.319814	-0.142848	0.128159	0.118482	0.550249	0.819489	-0.276194	0.652326	0.242436	0.33132	0.5249	-0.393996	0.262017	0.333407	-0.562871	0.995924	-0.693007
LOC100289098	0.66784	0.000660548	0.00940469	-0.476874	0.190966	-0.346331	-0.672526	-0.313296	-0.198022	-0.470253	-0.860816	0.0696855	0.460023	-0.043652	0.523759	0.161174	-0.538957	-0.0343815	0.107855	0.631913	0.451122	0.868118	0.626129	-0.143593	-0.378877	0.347823	-0.0526824
LOC100505938	0.745838	0.0325851	0.150524	-0.169802	0.576036	-0.289448	-0.237795	-0.202015	-0.227896	-0.0124701	-0.0491906	-0.0475264	2.39954	-0.197788	1.4127	0.188283	0.038837	-0.0964337	0.491128	-0.589015	0.540984	1.07494	1.70932	1.48975	0.0931473	0.796951	-0.0882369
LOC100506248	0.646941	0.00732381	0.0536392	-0.611229	0.0357126	-1.13746	-0.901162	-0.859375	-1.03072	0.0259355	0.235413	0.36608	0.558018	0.105193	-0.103299	-0.233659	0.283503	0.316791	0.549606	0.536789	0.117442	0.127397	-0.289295	-0.198845	-0.139797	-1.13068	-0.293847
LOC100506538	0.622788	0.00479657	0.0395765	-0.508454	0.114333	-0.791479	-0.70439	-0.504914	-0.557719	-0.0730451	-0.419179	-0.907091	-0.138548	-0.324758	1.18546	0.164892	0.266424	0.432075	0.224995	0.175353	0.518139	0.166396	0.48302	0.0847711	-0.190291	0.182919	-0.494425
LOC100507316	0.68798	0.00664917	0.0500602	-0.268792	0.419188	-0.365151	-0.391917	-0.380353	-0.383005	-0.177851	0.0855282	-0.101903	1.24493	0.0655221	0.974529	-0.0826647	0.662792	0.319276	0.134425	-0.0724594	1.10564	1.15738	0.206594	1.33801	0.0472769	0.0919806	-0.384311
LOC100509445	1.49633	0.00114624	0.0139478	-1.11878	0.377556	-1.20789	-1.13068	-0.124018	-0.999658	-1.90582	-1.34459	-0.634032	1.22007	1.07993	-0.720942	0.0734006	-0.990197	0.511582	2.05648	-1.06615	0.123373	0.159127	2.00911	-0.12538	0.692516	0.409376	1.24263
LOC101060264	1.108	0.0022628	0.0229185	-0.735731	0.372268	-0.409933	-0.559019	-0.643697	-0.767607	-1.20485	-0.829277	0.0432031	-0.284343	2.59202	-0.569743	-0.0424308	-0.287745	0.316356	0.359609	0.0168146	0.0249289	1.14092	0.0424979	1.31806	1.00274	0.581577	-0.298175
LOC101060363	0.637956	0.00577763	0.0454798	-0.566677	0.0712789	-0.786335	-0.829637	-1.14112	-0.993253	0.241544	0.108738	-0.132882	0.38487	-0.0514751	0.189536	-0.651958	0.158809	0.561322	0.169808	0.328184	0.2887	0.277577	0.243565	0.687837	-0.302474	-0.376568	-0.634389
LOC101060373	0.744222	0.00913873	0.0623975	-0.653953	0.0902692	-1.13467	-0.928707	-1.07576	-0.859375	-0.0313238	0.10612	0.0210058	-0.0470364	0.0371123	0.540318	-0.205206	-0.925238	0.796951	0.530512	0.612967	0.494847	0.232282	0.734609	-0.243734	-0.325566	-1.22384	0.41432
LOC101926907	1.01402	0.00295792	0.0279196	-0.609997	0.40402	-0.320297	-0.492255	-0.14708	-0.159939	-1.16836	-1.37205	0.64269	1.68637	-0.347463	0.962595	1.20519	1.69713	-0.21587	0.317243	0.492533	0.00754364	0.553419	0.521612	-0.346054	-0.0552141	0.0171509	-0.674563
LOC101928000	0.651314	0.00728753	0.0534419	-0.414838	0.236475	-0.0990674	-0.285249	-0.19082	-0.250456	-0.61863	-1.04481	-0.43128	0.508122	0.996575	0.862408	-0.152342	0.787254	0.198414	-0.241711	0.097936	0.141367	0.906495	-0.49361	0.172584	0.669803	0.285961	-0.52437
LOC101928274	0.660356	0.0272322	0.132993	-0.469791	0.190564	-0.543816	-0.533054	-0.313486	-0.465915	-0.853057	-0.109421	-0.205559	1.60978	-0.383503	-0.147389	0.480993	0.465439	0.52106	-0.0334861	1.62971	-0.708167	0.139666	0.0907016	-0.921113	-0.141359	0.278027	0.374223
LOC101928554	2.28814	0.000548146	0.00818402	-1.39772	0.890422	-0.863513	-1.51065	-0.432572	-0.972318	-2.38638	-2.2209	1.96152	1.67565	-0.419285	2.57115	2.43096	-0.564639	0.42545	1.51884	0.0391918	1.10946	0.696089	3.00614	-0.131397	-1.11109	-1.35116	2.38987
LOC101929027	0.768918	0.0369292	0.163812	-0.435105	0.333813	-0.418987	-0.315314	-0.273538	-0.341408	-0.738431	-0.522951	-0.407626	-0.00263255	0.376345	0.307752	0.867255	0.297446	-0.0843336	-0.373178	0.134001	0.28519	-0.0312126	3.42291	0.113524	0.256922	-0.0636602	0.242303
LOC102659288	2.84102	0.0059169	0.0462201	-0.849763	1.99125	-0.245897	-1.0455	-0.415744	-0.60847	-1.24793	-1.53504	-0.0858262	3.77456	2.57115	-1.54007	4.38144	3.95468	5.13774	0.779277	3.59632	4.27995	4.27995	-0.446521	0.0477248	-1.1078	-1.18542	3.42291
LOC284926	0.63791	0.0465941	0.190234	-0.318602	0.319307	-0.581965	-0.646741	-0.516674	-0.468652	0.370276	-0.067859	-0.488835	-0.0311197	-0.175015	0.123781	-0.227427	-0.687064	1.29483	0.346875	-0.140239	0.220892	0.479922	0.773161	2.29785	0.484092	0.84587	-0.00865116
LOC285043	0.758384	0.00608048	0.0470151	-0.332668	0.425716	-0.294014	-0.166684	-0.174023	-0.0767557	-0.929201	-0.355329	0.802959	0.622213	1.2038	0.66774	-0.0162518	0.00372737	0.04465	-0.0980259	1.92321	0.161286	0.450491	-0.0750235	0.387482	1.13331	-0.313027	-0.0870763
LOC285556	1.50332	0.0416349	0.17747	-0.338619	1.1647	-0.16426	-0.257335	-0.241057	0.0256365	-0.7541	-0.640598	1.59076	1.59576	3.55598	-0.743792	-0.320083	-0.569743	0.975423	1.0159	1.40999	0.0348697	-0.584341	-0.00420562	3.67957	3.08443	-0.833341	4.74808
LOC439911	1.39002	0.000515485	0.00778501	-0.955266	0.434757	-1.00838	-0.654392	-0.881942	-0.867241	-1.14658	-1.17306	-0.180096	0.76166	0.159327	0.40479	-0.231987	1.3111	0.116106	0.467013	0.287904	-0.0564804	1.63981	0.471556	2.77124	-0.16024	0.105082	-0.910671
LOC441179	1.12214	0.0312153	0.146144	-0.286993	0.835143	0.285762	-0.132917	-0.0783481	-0.209468	-0.764622	-0.822364	1.70717	3.88712	-0.2222	1.54281	0.104303	0.652056	0.215464	2.41774	-0.0463103	-0.0356053	-0.109565	-0.02621	-0.392937	1.56966	0.0124474	2.08635
LOC441666	0.952583	0.0080888	0.0574936	-0.415756	0.536827	-0.396796	-0.50687	-0.460695	-0.327547	-0.368782	-0.433843	-0.331656	0.455001	1.02124	-0.604042	-0.137274	0.0146858	1.93155	0.579892	1.28381	-0.789387	-0.0731777	0.446141	1.45346	1.36261	0.338981	1.6374
LOC613266	2.14172	0.0165017	0.0935116	-0.691729	1.44999	-0.687836	-0.673667	-0.364481	-0.497725	-1.08623	-0.840433	-0.850808	2.11782	4.38144	-0.472632	0.94975	0.540587	3.19964	0.761407	4.19157	-1.14475	-1.59367	-1.02004	2.47864	4.61668	1.52251	3.52174
LOC728554	1.51223	0.00134076	0.0155757	-1.07575	0.43648	-0.983555	-1.19776	-1.73562	-1.44033	-1.1538	0.0565378	-0.364845	-0.873813	-0.38064	0.0827142	-0.148806	0.713899	2.13079	0.042117	0.471708	0.657432	-0.065567	0.997329	1.52495	0.865897	-1.10046	2.43096
LOC728819	1.18656	0.00976063	0.0653374	-0.700394	0.486163	-0.490531	-0.648414	-0.569008	-0.578248	-1.45498	-0.461188	-0.166997	-1.57549	1.85396	2.06835	0.0574727	-0.473898	1.47401	0.236863	0.727616	0.351784	0.329352	0.104767	0.602889	2.55646	-0.279712	-0.0888135
LOC729680	1.55306	7.54777e-05	0.00183022	-1.12351	0.429545	-1.64586	-0.897711	-0.822364	-1.04748	-1.8856	-0.442063	0.345665	-0.012392	0.581149	1.86495	1.48067	-0.646066	-0.0383105	-0.678961	-0.00623099	0.89544	1.59734	0.625976	0.0319081	0.781543	0.351197	-0.301152
LOC93622	0.675	0.0492858	0.197649	-0.448908	0.226092	-0.765179	-0.0139341	-0.92032	-0.971347	-0.216635	0.193969	0.820722	1.38496	-0.0529009	-0.480179	-1.4082	-0.302132	1.02427	0.416415	-0.132917	0.867628	-0.763626	0.711605	0.804706	-0.533778	0.402136	0.858775
LPAR3	2.18665	0.000158735	0.00319396	-1.89749	0.289153	-1.71994	-1.821	-1.89442	-1.38059	-2.41349	-2.15552	0.0789118	-0.258316	0.927906	0.974984	2.68144	-1.04044	0.0465996	0.83645	-1.1538	0.757844	0.554325	0.272921	1.72996	0.462268	-2.69221	0.447602
LPCAT1	0.824123	0.00137459	0.0157805	-0.603622	0.220501	-0.154016	-1.05936	-0.582533	-0.905274	-0.350954	-0.569594	0.568349	-0.0826958	-0.355084	0.00636781	-0.285928	0.242849	-0.397622	0.426836	1.02375	0.439015	0.712034	0.445809	-0.981957	0.514027	0.364624	0.887646
LRBA	0.665292	0.00316556	0.0292402	-0.538191	0.127101	-0.869594	-0.792547	-0.70599	-0.855958	-0.0683362	0.0632808	0.385493	-0.487791	-0.100428	-0.690403	0.0830474	-0.449292	0.837588	-0.0528333	0.0264162	0.353084	-0.177114	0.599469	0.569412	0.473667	0.138522	0.524782
LRIF1	1.07906	0.00874231	0.0604668	-1.02528	0.0537795	-0.447383	-0.957933	-1.32919	-1.43651	-0.797603	-1.18306	0.0223191	0.499408	-1.27843	-0.685034	-1.35457	-0.0388651	1.74623	0.125493	0.339778	0.0270531	-1.4149	-0.00125972	0.00786788	0.105411	1.32815	1.43182
LRIG1	0.683701	0.000257155	0.00462192	-0.422646	0.261055	-0.39694	-0.45559	-0.310371	-0.4535	-0.606888	-0.312586	0.257165	0.136062	0.91236	0.0967263	0.14643	-0.243396	0.658095	0.09414	0.17219	0.165231	-0.1365	0.495761	0.095496	1.05173	-0.262398	0.537795
LRP8	1.19827	0.000245154	0.00445876	-0.851807	0.346468	-0.625895	-1.05183	-0.573387	-0.679164	-1.13068	-1.04988	0.585887	0.893087	-0.717626	0.038889	-7.98054e-05	-0.0305223	1.04393	-0.0581198	1.20166	0.918421	1.04455	1.0081	0.736667	-0.659264	-0.819489	0.357394
LRPPRC	0.599101	0.0305416	0.143962	-0.552788	0.0463132	-0.865629	-0.901623	-0.97935	-0.691444	0.0637508	0.0575698	0.503066	-1.21266	-0.306653	-0.68951	-0.661912	0.140385	0.0502541	0.411745	0.83426	0.641885	0.149128	-0.422363	0.0938001	0.962219	0.356788	-0.109421
LRRC32	0.803366	0.0019926	0.0209413	-0.347769	0.455597	-0.196901	-0.282238	-0.00585377	-0.353916	-0.900805	-0.346897	1.57196	1.09691	-0.222993	-0.0495955	-0.0323486	0.288153	-0.257884	0.629873	-0.0850397	0.844416	0.615878	1.22464	0.487158	-0.0173402	0.748262	0.447504
LRRC8B	0.980536	1.2231e-05	0.000452672	-0.711929	0.268607	-0.774829	-0.949911	-0.467456	-0.64719	-0.806962	-0.625228	0.108119	1.04455	0.668921	-0.11349	-0.085074	-0.0891198	0.0665558	0.529404	0.0171509	0.0660623	0.0590078	-0.489389	0.871788	0.636719	0.33727	0.669233
LRRC8D	1.39449	1.71199e-08	2.59407e-06	-1.37804	0.0164506	-1.06615	-1.36951	-1.93316	-1.80686	-0.625732	-1.4668	-0.312325	-0.613018	-0.0400337	0.380988	0.128498	-0.433347	0.322391	0.218137	0.278321	0.161938	0.0658541	0.050452	0.237033	0.175422	-0.298947	-0.0581542
LRRC8E	0.835502	0.0010836	0.0134015	-0.560328	0.275174	-0.411464	-0.804518	-0.590896	-0.340534	-0.351727	-0.862829	-0.305582	-0.212551	0.351919	1.25459	0.890905	0.406027	-0.765388	0.766155	0.457695	-0.0364746	0.643464	-0.107665	-0.258872	0.170574	0.948674	0.199317
LRRTM1	1.37217	0.0212299	0.112047	-0.64757	0.724601	-0.588877	-0.500331	-0.617151	-0.190602	-0.637298	-1.35116	-0.963449	0.0345614	-0.153234	0.0979077	2.02615	0.814672	2.33457	0.658324	4.07088	1.41792	0.0330514	2.49842	-0.217251	-0.0919477	-1.21705	0.250095
LSG1	0.779686	0.00963666	0.0647348	-0.440528	0.339158	-0.652746	-0.496794	-0.488477	-0.527622	-0.463461	-0.0140671	-0.17533	-0.299157	0.225123	1.46558	0.447993	-1.24001	1.0458	0.898419	0.994719	0.0943733	0.630518	-0.136785	-0.185828	1.12384	0.0530482	0.484232
LSM1	0.658207	0.00920485	0.0626445	-0.444333	0.213873	-0.722626	-0.544622	-0.716549	-0.594765	0.040212	-0.12765	0.155369	-0.491013	-0.510702	0.657191	-0.463461	0.00214617	-0.0829787	-0.0193027	1.70506	0.080329	0.500982	0.23768	0.704039	0.362701	0.472599	0.111331
LSM2	1.18819	0.00257665	0.0252586	-0.691555	0.496638	-0.79535	-0.604042	-0.897139	-1.12723	-0.575973	-0.149595	0.0960545	-0.842154	0.239162	-0.387012	-0.578409	-0.116606	0.920303	0.137081	-0.346793	1.23746	1.82135	0.476819	1.37459	2.07844	1.20519	0.630736
LSM4	0.843265	0.000338462	0.00568159	-0.604694	0.23857	-0.751773	-0.764955	-0.661744	-0.702701	-0.525889	-0.221104	-0.55118	0.937215	-0.53776	-0.246578	-0.0118667	-0.45693	0.403716	0.0651472	0.643464	0.750182	0.51681	0.603642	0.473839	0.0909184	0.469262	0.667247
LSM5	1.04753	0.000368246	0.00603111	-0.793764	0.253765	-1.11109	-0.644823	-0.971783	-1.32306	-0.146598	-0.565229	-0.112365	0.732534	0.654332	-0.533054	-0.0744165	-0.995811	0.672403	0.749948	1.3323	0.706945	0.274877	0.259207	0.18966	-0.286289	0.550143	-0.0601699
LSM8	0.824999	0.0143837	0.0851924	-0.38416	0.440838	-0.518519	-0.563697	-0.562684	-0.323262	0.0372365	-0.374037	-0.752574	-0.638004	1.60183	-0.146865	0.326779	0.559937	1.32815	0.711366	-0.12363	1.65126	-0.520624	-0.28865	0.617168	0.911169	0.808589	1.00751
LTBP1	1.17592	0.0105338	0.0686811	-0.435268	0.740653	-0.478063	-0.80987	-0.426242	-0.138548	-0.601124	-0.157762	-0.0309999	1.99528	-0.589504	-0.261711	0.380911	2.77124	1.50712	2.40924	1.7532	0.546958	1.0224	-0.103336	-0.514132	-0.231671	0.327043	0.868411
LYAR	0.992605	0.00116927	0.0141774	-0.654952	0.337653	-0.373457	-1.06561	-0.680775	-0.664414	-0.396397	-0.749059	1.04393	-0.214763	1.3576	-0.895134	-0.672781	-0.312889	0.499269	0.945099	0.483752	0.723648	0.643093	0.578344	0.270414	-0.467596	0.909928	0.510534
LYPD1	3.19951	0.000183339	0.00355793	-2.59506	0.604456	-3.24586	-2.5762	-2.54815	-3.54383	-1.89442	-1.76188	3.08443	1.09216	-1.82501	1.02939	0.36396	0.487158	3.04591	1.2847	-2.36839	2.64367	1.84704	2.17377	0.234765	-0.54966	-2.62191	-0.250699
LYPD6B	2.20661	7.71225e-05	0.00185575	-1.95899	0.247624	-2.73095	-2.52543	-1.07662	-2.0607	-2.2209	-1.13935	0.191417	1.26437	-1.00057	-0.0624294	-2.16936	-1.09559	0.683058	0.286651	0.235123	0.919912	-0.0129152	0.688576	1.13543	1.53234	-0.771115	2.13708
LYPLA1	0.969361	9.21252e-05	0.00213343	-0.865609	0.103751	-0.668101	-1.10314	-1.09559	-1.29928	-0.190348	-0.837199	-0.912202	0.0248593	-0.509681	0.502679	-0.206287	-0.621701	0.267603	0.106714	0.506531	0.541474	0.588513	0.0606974	0.510407	0.110312	0.41432	0.275784
LZTS3	0.858211	0.000695091	0.00973439	-0.80411	0.0541012	-0.421406	-0.674802	-0.59621	-0.566885	-1.43651	-1.12884	0.453459	-0.161339	-0.219751	0.979707	0.102498	-0.462816	-0.0536563	0.180659	0.166449	0.382782	0.0719306	0.0245369	0.411543	0.169848	-1.36512	0.184892
MACC1	0.952579	0.0465471	0.190178	-0.383562	0.569017	-0.169058	-0.44326	0.0744424	-0.393097	-0.631645	-0.738756	1.63209	1.90335	0.945561	-0.595323	-0.0891797	2.72869	0.499007	1.45004	1.78036	-1.15888	-1.00382	-0.476131	-0.429474	1.08959	0.593876	0.234507
MAD1L1	0.64977	0.0443421	0.184497	-0.399635	0.250135	0.578919	-1.07742	-0.799444	-0.947578	-0.0759384	-0.0763504	-0.233312	-0.84462	0.0409943	0.980766	-0.665493	-0.738431	-0.105173	0.43157	1.2046	1.25808	0.737971	0.955894	0.497007	0.320745	0.355072	-0.19351
MAD2L1	1.43782	6.76804e-06	0.000288366	-1.22073	0.217091	-0.987881	-1.17395	-0.884572	-1.43363	-1.35945	-1.48489	0.187896	-0.256216	0.634046	-0.851139	0.331499	-0.808375	0.862842	-0.509531	0.219465	0.654735	0.153481	0.0211506	0.890593	0.784998	1.17879	-0.0207787
MAF1	0.888508	0.00454019	0.0380372	-0.660556	0.227951	-1.14658	-0.884088	-0.999658	-0.931896	-0.269954	0.268836	-0.204517	0.106002	-0.272897	0.479394	-0.0892134	0.116522	-0.9088	0.274243	0.421139	0.920303	1.72996	0.947236	0.589317	-0.362297	0.352729	-0.451902
MAGEF1	1.29607	0.000150041	0.00305422	-0.950269	0.345804	-1.23296	-1.12645	-1.81585	-1.31662	-0.0273417	-0.182398	-0.101266	-0.595753	-0.341697	1.35167	0.0907362	-0.18578	1.51884	0.604966	0.493257	0.0473142	0.419405	0.515454	0.500982	1.02375	-0.291795	0.482778
MAGOH	0.801234	0.00132419	0.0154264	-0.674207	0.127027	-0.681468	-0.71173	-1.14036	-1.12169	-0.314029	-0.0759685	-0.0898755	-0.936014	0.679401	-0.64149	-0.0629489	-0.208849	0.336561	0.445434	0.279515	0.224038	0.416512	0.0308554	0.455972	0.70322	-0.370628	0.770737
MAGOHB	0.656723	0.000984408	0.0125199	-0.475363	0.18136	-0.503701	-0.26073	-0.327467	-0.515436	-0.498395	-0.746446	-0.0986477	-0.146731	1.03805	0.572192	-0.314592	0.0504885	0.299457	0.0945932	0.0179859	-0.0642247	-0.033459	0.101276	-0.476756	0.813349	0.626129	0.422653
MAL	2.91155	0.00360042	0.0318799	-1.6057	1.30585	-2.43621	-1.8356	0.0392231	-1.95573	-1.77525	-1.67065	-2.6473	-1.54007	-1.07662	4.74808	0.516375	3.63341	-0.27438	0.927328	2.84776	-0.385174	1.81404	1.29483	4.89619	2.69153	3.42291	0.0247086
MAL2	2.03863	1.31308e-06	7.88538e-05	-1.74032	0.298314	-2.49911	-1.8856	-2.43621	-1.98875	-0.701931	-0.93031	-0.0109714	0.645128	-0.941266	0.922091	-0.386708	1.64412	0.74395	0.333293	0.128359	0.434589	0.623965	-0.171526	0.921359	-0.0199551	0.641348	-0.734756
MAMLD1	0.655045	0.0369857	0.163903	-0.323452	0.331593	-0.401277	0.0273049	-0.158206	-0.0750649	-1.6162	0.282732	1.15302	0.265259	-0.167748	-0.246291	-0.509811	0.767845	0.310374	0.833012	-0.231507	-0.126219	0.507856	1.88675	0.198414	-0.228319	-0.0155317	0.908381
MANEAL	0.979889	0.012525	0.0775986	-0.496042	0.483847	0.00390447	-0.348142	-0.306977	-0.599735	-0.988435	-0.736865	0.90219	1.3669	-0.047794	1.05622	0.9954	1.14372	0.384403	-0.679943	0.128992	-0.0588034	-0.0969112	0.341892	-0.864574	-0.61238	1.28381	2.49842
MANSC1	0.947784	0.00294918	0.0278601	-0.727085	0.220699	-1.72428	-0.797603	-0.791197	-1.01564	0.0605174	-0.0943098	0.297993	1.34974	-0.22931	0.380481	-0.27416	-0.00426171	-0.48436	0.395162	-0.00193536	-0.0291694	0.389255	0.886983	-1.07892	0.416415	0.272335	1.24493
MAP4K1	0.656151	0.00200517	0.0210258	-0.441822	0.214329	-0.186183	-0.296021	-0.245751	-0.328798	-0.632184	-0.961993	0.099418	-0.307388	1.14146	0.111634	0.331656	-0.218177	-1.33152e-05	0.335432	-0.0542826	0.926821	0.371143	0.150267	0.0118115	0.804396	0.127153	-0.402057
MAP7	0.619982	0.00583717	0.0457826	-0.42649	0.193492	-0.538396	-0.682671	-0.353263	-0.273473	-0.436867	-0.274271	-0.316625	0.985956	-0.284509	0.884681	-0.135684	-0.50463	0.395047	-0.0106379	0.52089	0.609732	-0.222564	0.385298	0.874475	0.3378	0.0669553	-0.490311
MAP7D1	0.65512	0.000563384	0.00835529	-0.526238	0.128882	-0.431625	-0.609837	-0.77707	-0.706162	-0.382348	-0.250389	-0.469164	0.513274	-0.266713	-0.0343815	-0.300231	0.239396	-0.422142	0.0638537	0.939427	0.285254	0.122954	0.277147	0.185593	-0.0363365	0.449803	0.514378
MAP7D2	1.24522	0.0143648	0.0851689	-0.662293	0.582925	-0.657419	-0.267625	-0.304721	-0.330191	-1.31662	-1.09718	-0.745281	2.09978	-0.0641082	2.40924	0.455239	-0.22289	0.0172366	1.49298	-1.11172	2.16538	0.242849	2.07844	-1.09472	0.0156218	1.04393	0.544826
MAP9	0.711048	0.0379108	0.166611	-0.48393	0.227118	-0.572075	-0.676317	-0.542431	-0.470621	0.0402737	-0.682409	-0.390041	0.994719	1.00646	-0.0159417	-0.0567557	-1.5829	1.62	0.220151	-0.552734	0.61347	-0.726699	0.919637	0.59584	-0.135174	0.279786	0.844079
MAPK13	0.661497	0.0459011	0.18856	-0.362278	0.299219	-0.154277	-1.05806	-0.352539	-0.384771	-0.180767	-0.0432517	0.835682	1.65126	0.0972547	-0.138512	0.0968083	1.94729	0.526855	-1.28116	-0.477022	0.166047	0.417996	0.336362	-0.0772543	0.285042	0.639308	-0.238437
MARC1	0.769543	0.00552542	0.0439019	-0.522008	0.247535	-0.113715	-0.316554	-0.220536	-0.365251	-1.2683	-0.847688	0.80215	-0.262327	0.629032	-0.473156	0.162056	-0.426348	0.802724	0.259531	0.70322	0.0477675	0.467158	0.626623	-0.19015	0.818441	-0.985868	0.979707
MARS	0.587124	0.00872183	0.0603799	-0.309122	0.278002	-0.385679	-0.452764	-0.382744	-0.434052	-0.0591445	-0.14035	-0.275472	-0.0535627	1.38631	-0.487116	-0.0206227	-0.158302	0.341075	0.423897	0.416637	0.675388	-0.289145	0.222403	0.157407	0.979226	0.718257	0.411642
MARVELD2	1.0169	0.00235851	0.0235833	-0.699743	0.31716	-1.3635	-1.10046	-0.431168	-0.552403	-0.563852	-0.187078	-0.0644017	0.693509	-0.188994	1.71584	-0.964581	-0.442341	-0.00606958	1.1222	0.594362	0.250056	0.201478	0.937887	0.640684	-0.668101	0.218831	1.03421
MARVELD3	0.715912	0.000315241	0.00538663	-0.484962	0.23095	-0.56482	-0.910132	-0.0849123	-0.498229	-0.744256	-0.107425	-0.180055	0.192318	-0.210629	0.116734	-0.633687	0.191779	0.154933	0.642056	0.508286	0.0728664	0.0558086	0.670276	0.401456	0.543551	0.58063	0.588872
MASTL	1.07887	0.000128267	0.00274087	-1.02444	0.0544237	-0.796042	-1.41633	-0.717852	-0.729623	-1.25932	-1.2275	0.348405	0.239749	-0.126398	-1.53746	0.355167	-0.601124	-0.418987	0.190053	0.546958	0.578051	0.523919	0.179938	0.367036	0.0564426	0.539856	-0.370829
MB	0.679256	0.0133986	0.0813374	-0.38903	0.290226	0.0158999	-0.192034	-0.304567	-0.426579	-0.749377	-0.677525	0.430807	-0.154315	-0.0615069	1.8833	0.236637	0.727616	-0.18996	-0.329292	-0.577723	0.190447	-0.00256933	1.13729	0.593164	-0.219624	0.432382	0.546958
MBOAT2	0.691697	0.00375159	0.0328749	-0.506262	0.185435	-0.151097	-0.607653	-0.192672	-0.383143	-0.738996	-0.964009	1.11564	1.02427	-0.204305	-0.422029	-0.240825	0.168062	-0.135105	0.422461	0.2245	0.133264	-0.0441968	0.709208	-0.697968	0.64288	0.0215151	0.249593
MCAM	0.650753	0.00584321	0.0458009	-0.499872	0.150881	-0.581208	-0.760972	-0.302892	-0.573387	-0.307935	-0.472837	-0.508664	0.614327	0.43923	-0.719839	0.0474167	-0.0145047	-0.234928	0.814364	0.68965	0.226723	0.789579	0.571562	-0.861862	0.317868	0.312573	-0.0693945
MCCC1	0.877321	0.0246114	0.123924	-0.509773	0.367548	-1.11172	-0.687376	-0.620468	-0.700035	0.0547803	0.00618452	-0.790861	0.220098	-0.33149	1.63491	0.438811	0.409085	1.17557	1.02189	0.927906	-0.792191	1.68927	0.290473	-0.456512	1.56188	-0.838183	-0.279889
MCM10	1.2169	0.000142654	0.00294313	-0.963839	0.253058	-0.662152	-1.15467	-0.529216	-0.818228	-1.20387	-1.4149	-0.421727	-0.87589	0.961073	-0.0967609	0.923276	-0.980202	0.462024	0.123295	0.216265	0.733575	0.155869	-0.00573034	0.866838	0.959525	1.02427	0.00322777
MCM2	2.40682	3.18105e-09	6.80209e-07	-2.17835	0.228469	-2.16936	-2.14018	-3.08491	-2.09136	-2.00514	-1.57913	-0.0811263	-0.849437	0.978689	-0.173576	0.11638	0.462517	-0.52437	0.159565	0.858775	0.174285	0.808589	0.382229	-0.470726	1.34707	0.401716	0.0649243
MCM3	1.08153	0.00101444	0.012767	-0.84375	0.237782	-0.671086	-0.738431	-1.14658	-1.02273	-0.970644	-0.513033	0.433076	-0.493109	0.569074	-0.115557	-0.553962	0.18531	2.1051	0.127595	0.159913	0.180987	-0.703878	-0.365873	0.125493	1.2286	0.0377101	0.884042
MCM4	1.10242	1.01606e-09	2.83504e-07	-0.936302	0.166117	-0.861862	-0.970123	-0.691444	-0.908461	-1.1632	-1.02273	-0.275641	-0.11532	-0.0306001	0.183335	0.0692462	0.15353	0.219465	-0.0477346	0.206011	0.540669	0.285351	0.239043	0.0133185	0.626383	0.416637	0.174173
MCM5	0.880482	0.00211123	0.0218081	-0.564519	0.315963	-0.421963	-0.809028	-0.488835	-0.789141	-0.735298	-0.142848	-0.283049	-0.420892	-0.189161	0.278807	0.641486	-0.321972	0.766751	0.561322	0.158304	1.02124	0.925257	0.424761	0.124975	0.657432	1.54045	-0.830298
MCM6	0.765818	7.68881e-05	0.00185374	-0.56116	0.204659	-0.635065	-0.617489	-0.584901	-0.717626	-0.168326	-0.643549	-0.177851	0.521335	-0.0683766	0.087934	0.0432031	1.15885	0.236705	0.194853	0.200318	0.168785	0.424601	0.130987	-0.180019	0.523759	0.450158	-0.440706
MCM7	1.23516	0.00164487	0.0181372	-0.783234	0.451928	-1.12978	-1.01118	-1.08243	-1.0455	-0.301849	-0.128671	-0.707417	-0.348778	0.440811	-0.933215	-0.127035	1.09285	1.87539	0.229568	0.85618	0.518583	0.803175	0.514172	0.0892571	2.00537	1.20287	-0.280923
MCUR1	1.79853	1.19019e-05	0.000442788	-1.35244	0.446093	-1.49604	-1.67065	-1.87244	-1.81585	-0.4019	-0.857735	-0.101638	-0.619016	0.0810183	0.578547	-0.987111	1.02939	1.02815	0.104266	1.50831	1.02986	1.88675	0.367244	0.687991	-0.0833248	0.38369	0.243368
MDH2	0.671768	0.0137191	0.0826461	-0.465442	0.206326	-1.16446	-0.451148	-0.855958	-0.815366	0.200601	0.293675	0.20542	1.10232	-0.269374	-0.23679	-0.2058	-0.297051	0.345665	0.187896	0.966741	0.621326	1.11619	0.58637	-0.244629	-0.034759	-0.0133503	-0.528952
MDK	1.1979	0.0377025	0.165923	-0.889058	0.308843	-1.84577	-0.607282	-0.621535	-1.28301	-1.32012	0.343384	1.00935	0.495626	0.0287192	0.195868	-0.751161	-2.90813	-0.714651	-0.430087	1.14556	0.997329	1.64412	2.47864	1.38847	1.56751	-1.05419	-0.15148
MEA1	1.04336	0.00420682	0.0358347	-0.706537	0.336822	-0.955999	-0.870068	-1.18306	-1.11813	-0.10516	-0.00679625	-0.340452	-0.10975	2.55646	-0.331952	-0.857735	-0.46884	0.821578	0.256922	0.248194	0.369759	0.888663	0.459178	0.534674	0.880581	0.444701	0.0371659
MECOM	2.03177	4.04481e-07	3.08484e-05	-1.72944	0.302329	-1.8356	-1.76188	-0.826813	-1.73067	-2.25673	-1.96496	-0.0285046	-0.120791	0.627669	1.18726	0.0126989	-0.473016	0.904858	0.0589688	0.717997	0.415693	0.224598	-0.383143	1.07494	1.34974	-1.2059	0.47419
MED30	0.697564	0.0124788	0.0773961	-0.485892	0.211672	-1.06288	-0.435233	-0.62765	-0.519154	-0.344282	0.0738501	-0.729623	-0.0472967	-0.367708	0.647025	1.23135	-0.404747	-0.155579	0.273653	0.447265	0.19274	1.43721	0.39411	0.252251	0.023789	0.777668	-0.585354
MEIS1	1.09822	0.0405057	0.17427	-1.08861	0.00960594	-1.70007	-1.34161	-2.23005	-1.34459	0.165777	-0.0811263	0.779748	-1.00838	0.770737	-1.36828	-0.925977	-0.230883	0.38423	0.927906	0.6787	0.985036	0.0322155	0.253794	-0.129898	1.45004	-3.24586	0.80057
MELK	2.66465	8.67573e-09	1.48135e-06	-2.26197	0.402677	-1.38965	-2.9562	-1.47149	-2.80576	-2.30142	-2.6473	0.0461037	0.862408	-0.137192	-0.332163	-0.720942	0.537924	1.99042	0.203475	0.649285	1.11906	0.657902	-0.0489861	0.643464	-0.268257	0.841973	0.398351
MEOX1	1.94812	0.0103286	0.0677132	-0.966942	0.981177	-0.888949	-0.394633	-0.840433	-1.01164	-1.00976	-1.65623	0.724894	-1.29602	2.61841	3.35883	1.92714	-1.11496	-0.499852	0.346338	0.106539	0.938509	-0.152642	0.538016	3.29814	4.89619	0.702533	-0.693212
METRNL	1.12722	0.000510357	0.00772286	-1.08024	0.0469774	-0.43911	-1.39806	-2.38638	-0.912202	-0.607282	-0.738431	-0.952497	0.0307447	0.880111	-0.916722	-0.0939966	-0.0262907	0.387702	0.0598154	0.980202	0.306102	0.305408	0.0201872	0.582954	0.00260818	0.0416701	-0.85636
METTL21A	0.793154	0.00397267	0.0343596	-0.553625	0.239528	-0.570205	-0.569594	-0.529381	-0.749602	-0.0585619	-0.844408	-0.707873	0.74546	0.00529755	-0.665042	-0.218505	-0.429251	0.32397	0.454539	0.600291	0.431825	0.0481913	0.401232	1.52251	0.558458	-0.212807	0.974157
METTL2A	0.890856	0.000352798	0.00584619	-0.710172	0.180684	-0.960471	-0.800365	-1.19582	-1.10314	-0.00719861	-0.194031	-0.543033	-0.0140671	-0.121684	-0.508986	-0.539517	0.265259	0.424285	-0.04666	0.697897	0.625522	0.793502	0.464828	0.323434	0.541117	0.532987	-0.00393324
METTL7B	1.46192	0.00789569	0.0564542	-0.959714	0.502207	-0.6864	-0.228839	-0.343333	-0.332163	-1.99819	-2.16936	2.62953	1.41792	-0.0617148	-0.705439	0.0818581	-0.60424	-0.522326	0.290872	0.176232	0.15817	-0.0265286	2.93633	-0.828192	0.503764	0.338824	2.25025
MFHAS1	1.10215	0.00263717	0.0257088	-0.59229	0.509855	-0.208197	-0.837804	-0.416804	-1.17395	-0.287315	-0.629671	0.419819	-0.534637	0.571895	0.45693	-0.0444684	-0.386407	1.45004	0.770471	-0.232735	-0.56643	0.354365	1.8386	0.545272	2.03503	0.201827	1.2781
MFN1	0.736713	0.00705533	0.0522245	-0.453474	0.283239	-0.618135	-0.712309	-0.599974	-0.467689	0.0890893	-0.411829	-1.03072	-0.117126	-0.0410986	1.23516	-0.0501082	-0.302543	1.00274	0.355708	0.913135	0.993003	0.548574	0.16702	0.295901	0.814962	-0.156977	-0.0958047
MFSD10	0.723811	0.0329233	0.151627	-0.514282	0.209528	-0.673667	-0.876327	-0.758206	-0.838183	0.0449248	0.0157633	0.00532699	-0.013494	0.0114936	-0.64233	-1.16934	0.529249	-0.600301	1.09462	-0.113149	1.15676	1.3111	1.18065	0.93575	-0.604827	0.503612	-0.232658
MFSD3	1.59241	0.000188535	0.00363105	-0.929526	0.662888	-0.932737	-0.889999	-1.1632	-1.05116	-1.0314	-0.508664	0.927906	-0.608241	-0.198635	-0.335633	2.07341	0.282934	0.192046	-0.218602	1.02189	2.31348	1.62255	1.17196	1.5389	-0.219955	0.331983	0.710214
MGC70870	1.06815	1.77264e-05	0.000603541	-0.784923	0.283226	-1.24656	-0.858151	-0.657755	-0.741124	-0.842987	-0.362964	1.37329	-0.123457	0.435714	0.190447	-0.258684	0.844416	0.888209	0.7822	0.00547564	-0.174947	-0.0718615	0.0444529	0.200268	0.187576	0.241426	-0.032914
MGME1	1.19188	0.00624282	0.0479123	-1.12631	0.0655709	-0.752884	-1.49604	-1.51065	-1.51602	-0.632828	-0.849437	0.0143232	-2.33094	0.920303	-0.38118	-0.0332175	-1.96496	1.11981	0.932552	0.334093	0.59584	0.0440634	0.430807	-0.255867	1.00646	0.590148	0.026904
MGST2	0.778407	0.00423114	0.036015	-0.650848	0.127559	-0.615402	-1.12466	-0.866512	-1.28116	-0.143671	0.126328	0.456059	-0.113964	-0.219507	-0.00128204	-0.00825813	0.24441	0.614482	-0.00161738	0.0938001	1.18403	0.4349	0.769609	0.518827	-0.529216	-0.675822	-0.725508
MICALL1	0.869528	0.000946918	0.012158	-0.568312	0.301216	-0.582184	-0.903508	-0.540555	-0.78773	-0.0689173	-0.526979	0.00900742	0.0065393	0.0920813	1.2229	-0.382251	0.970696	0.846176	0.0579982	-0.0750235	0.512748	0.00388717	0.530384	0.478953	-0.122273	1.24588	-0.578248
MIR1236	0.75377	0.00300572	0.0282311	-0.580387	0.173383	-0.910132	-0.658073	-1.04291	-0.9177	-0.136292	0.182783	0.339882	-0.535557	0.547922	-0.118047	-0.793835	-0.385432	0.614675	0.0236826	-0.101008	0.174035	0.483752	0.346338	0.749121	0.687991	0.889044	-0.148433
MIR155	1.04799	0.0145315	0.085707	-0.610109	0.437884	0.225123	-0.780164	-0.491699	-0.54196	-0.703672	-1.36828	1.69419	1.02815	-0.207892	0.0232613	0.217471	-0.269587	1.03545	1.13065	0.0682037	1.17103	0.119954	-0.409586	-0.12247	-1.11708	2.79614	-0.151738
MIR3658	0.833491	7.86647e-06	0.000320029	-0.632751	0.20074	-0.463354	-0.467456	-0.476465	-0.31389	-0.832526	-1.24281	0.0726943	-0.2848	0.464465	0.171075	0.149081	-0.0509885	0.44814	0.0349176	0.422083	0.398903	0.534472	0.0538945	-0.118325	0.625079	0.493257	-0.202103
MIR4647	1.10792	0.000399489	0.00635965	-0.813975	0.293943	-0.951975	-1.0314	-0.965068	-0.923731	-0.684826	-0.326852	-0.21969	0.264266	1.86163	-0.539795	-0.61672	-0.538763	0.679894	0.00398255	-0.00734418	0.0422308	0.541772	0.387702	0.838211	0.696976	0.22149	1.08725
MIR7110	1.3582	0.0100832	0.0666696	-0.845057	0.513142	-1.11708	-0.995811	-1.14977	-1.40319	-0.0211937	-0.383302	0.438466	0.0243928	-0.664001	0.555684	-0.867951	-0.940272	0.342382	0.641486	0.362115	0.321858	1.65126	3.55598	-0.371112	0.609888	-0.0317085	2.58181
MIR943	0.677746	0.000949817	0.0121844	-0.545528	0.132219	-0.705589	-0.671722	-0.794931	-0.952497	-0.215472	0.067044	-0.012496	0.301747	0.459546	-0.0469998	-0.932249	-0.161842	-0.108547	0.46613	0.0294161	0.644925	0.141956	0.334517	0.55124	-0.0294577	0.362701	0.114912
MIS18A	1.11274	1.056e-05	0.000404034	-0.860767	0.251974	-0.796978	-0.826358	-0.914613	-1.02004	-0.872308	-0.734306	0.27586	-0.362457	0.0646884	0.248777	0.127998	-0.504239	0.604602	0.299756	0.820117	0.957571	0.509757	0.846176	0.0620873	0.105531	-0.725921	0.701274
MKI67	1.00545	3.37285e-05	0.000981817	-0.75047	0.254977	-0.353405	-0.753517	-0.355963	-0.590896	-1.17061	-1.27843	0.283122	0.582621	0.926155	-0.111942	-0.150678	0.48636	-0.0567557	-0.0890939	0.259983	0.5429	0.164456	-0.158895	0.2908	0.466581	1.12636	-0.482336
MLF2	1.20843	7.44856e-05	0.00181362	-0.937916	0.27051	-1.38734	-1.07839	-1.61121	-1.15298	-0.4152	0.0176218	-0.287659	-0.0262392	0.342514	-0.417943	-0.561779	-0.282647	-0.292795	0.112049	0.854982	0.506704	0.418806	0.776917	1.0312	0.686995	0.711366	0.755685
MMACHC	0.735369	0.00487035	0.0398547	-0.716097	0.0192716	-0.758442	-0.735023	-0.459159	0.0326299	-1.0649	-1.31169	-0.62294	-0.0066249	0.0919069	0.0138781	0.307976	-0.499732	-0.462341	0.0335936	0.364468	0.0692804	0.298635	-0.199053	0.316168	0.0655985	-0.891539	1.42907
MMP7	3.81132	2.76847e-05	0.000837865	-2.65993	1.15139	-3.65484	-2.62191	-0.193563	-3.1631	-3.1631	-3.1631	0.749378	4.38144	2.53249	2.93633	-0.764622	3.08443	-0.0333169	0.989461	-0.261867	3.19964	0.834552	-0.0220621	-2.02619	-0.00442673	2.20185	0.625079
MND1	1.34277	0.000901026	0.0117954	-0.864308	0.478464	-0.328423	-1.04291	-1.02426	-0.716243	-1.48895	-0.585068	-0.582533	-0.127118	1.34974	-0.653082	0.987533	-0.796042	1.04519	0.431984	1.12384	1.22464	0.367099	0.763388	0.858098	0.106899	2.18652	-0.630737
MNS1	2.36737	1.8315e-06	0.00010296	-1.79694	0.570423	-1.65623	-2.05253	-2.48397	-1.40964	-1.55108	-1.62821	1.11714	0.216721	2.03503	0.152444	-0.040872	-1.19284	0.829882	1.0111	0.238769	1.36522	1.18816	-0.0680924	2.45558	-0.10865	-0.0977413	0.0249023
MOAP1	0.720492	0.0374916	0.165186	-0.686637	0.0338547	-1.35294	-0.763626	-1.19691	-1.15088	0.0697095	0.27482	0.00409311	-1.30671	-0.581639	-0.706775	-0.41449	0.641885	0.571397	0.48825	1.4874	0.392045	0.289125	0.565681	-0.054313	-0.685034	-0.770563	0.621326
MOB1A	0.953196	3.5275e-05	0.00102293	-0.618159	0.335037	-0.327779	-0.940272	-0.851139	-0.850365	-0.258215	-0.481185	0.297215	0.327492	-0.194564	0.110785	-0.235639	0.721186	0.539287	0.287446	0.248531	0.352337	0.335347	0.966199	1.24133	0.434989	-0.461531	0.390171
MOGS	0.901491	0.00102982	0.0128967	-0.746435	0.155057	-1.15664	-1.15298	-0.913249	-0.890443	-0.13555	-0.229745	-0.611903	0.162103	0.0362956	-0.324955	-0.936014	-0.108171	0.126921	0.250356	0.658693	1.15302	0.447391	0.943025	0.310614	0.507856	0.177746	-0.312067
MPHOSPH10	0.669076	0.00975154	0.0653148	-0.481966	0.18711	-0.630038	-0.977721	-0.599399	-0.487907	0.164494	-0.361227	-0.234855	-0.141921	0.133525	-0.310248	-0.2942	0.537044	0.215072	1.0531	1.414	0.835984	0.350473	0.161286	-0.687064	0.19384	0.0714244	-0.303701
MPLKIP	0.913657	0.00131481	0.0153545	-0.694357	0.2193	-1.22894	-0.770875	-1.1538	-0.922635	-0.0693599	-0.0205363	-0.682909	1.08635	-0.291596	0.236863	0.0779113	-0.469633	0.474463	0.563962	1.08959	0.40267	0.484792	0.504631	0.668431	-0.534251	0.2352	-0.337679
MPP7	0.594682	0.00682588	0.0509714	-0.401876	0.192806	-0.479992	-0.680411	-0.308742	-0.38744	-0.287381	-0.267292	0.0102559	0.643464	-0.251431	-0.300231	0.419489	0.842305	0.360329	0.251484	-0.0394341	0.483607	0.320898	0.0710678	1.10169	0.161423	-0.971783	-0.0182467
MPV17L2	0.599766	0.00125844	0.0148956	-0.372897	0.226869	-0.519765	-0.263459	-0.176936	-0.426909	-0.656706	-0.193609	-0.221528	0.626383	0.0397191	0.611259	-0.430926	-0.12186	0.140945	-0.120834	0.307591	0.733769	0.207897	0.333056	0.689021	-0.267227	0.627499	0.475131
MPZL2	1.71059	1.71434e-05	0.000588949	-1.30403	0.406563	-0.826358	-1.45498	-0.489759	-1.07576	-2.19663	-1.78068	0.0686932	0.80057	-0.0392885	1.11175	0.396255	1.91513	-0.296382	0.618843	-0.788517	0.650959	0.620256	-0.331105	0.0419884	-0.33884	0.632442	1.44225
MREG	1.56526	9.73762e-06	0.000381501	-1.27448	0.290779	-1.60738	-1.4762	-0.977114	-1.45232	-0.965489	-1.16836	1.12384	1.0655	-0.458774	-0.597972	-0.808676	0.14813	0.00401028	-0.0543585	1.16397	0.344804	-0.401801	1.53568	0.46283	0.585425	0.317868	0.221984
MRGBP	0.761815	0.000925736	0.0120277	-0.553062	0.208753	-0.628712	-0.392066	-0.736865	-0.730463	-0.701061	-0.129205	-0.0391189	0.297446	1.12093	0.140605	-0.208603	-0.553101	0.127311	0.377821	0.601254	0.487588	0.17765	0.837588	-0.00466322	-0.645449	0.697897	-0.0750946
MROH1	0.627023	0.000314235	0.00537748	-0.350358	0.276666	-0.170441	-0.291459	-0.235096	-0.399984	-0.452764	-0.552403	0.377458	0.377581	-0.255037	0.412925	0.010017	0.695197	-0.480333	-0.126122	0.337365	0.187149	0.461911	0.384567	0.891908	0.431738	0.264137	0.456191
MRPL1	0.742065	0.00325507	0.0298024	-0.621597	0.120467	-1.10389	-0.880224	-0.99515	-0.842634	0.0535928	0.0387202	-0.138259	-0.92647	-0.188607	0.0176218	-0.00791607	-0.00609215	-0.00155401	0.417838	0.496065	1.06296	0.595543	0.489052	-0.418131	-0.198242	0.601533	0.132138
MRPL11	0.669471	0.0129007	0.0792396	-0.476416	0.193055	-0.614875	-0.464347	-0.813344	-0.864258	-0.112957	0.0112826	-0.00120263	-0.286869	0.733769	0.608627	-0.797603	-0.388631	0.890196	0.261744	0.344053	0.478375	0.933699	0.476353	-0.784456	0.417838	0.773711	-0.570723
MRPL12	0.684432	0.000802506	0.0108454	-0.534065	0.150366	-0.758206	-0.645449	-0.555405	-0.580007	-0.393906	-0.27142	0.225806	0.146986	0.605276	0.351197	0.20726	-0.476465	-0.0779085	-0.12394	0.196523	0.899381	0.701462	0.124746	0.222038	-0.271934	0.417996	-0.742567
MRPL13	1.8277	5.49628e-05	0.00142865	-1.29576	0.531946	-1.61121	-1.16205	-2.35209	-1.40532	-0.27252	-0.971347	0.0988042	-0.170314	-0.866512	1.03884	1.49298	-0.0330966	0.44429	-0.0461455	0.327608	1.03805	2.53249	0.853119	0.715507	-0.401458	1.47718	0.00979949
MRPL14	1.53348	1.03479e-06	6.48655e-05	-1.20708	0.326399	-1.21582	-1.30522	-1.78068	-1.48895	-0.833341	-0.618454	0.628629	-0.0534641	1.55273	-0.21231	-0.432472	-0.363728	0.745226	-0.142548	0.298131	0.442494	0.979707	0.406726	-0.00366081	0.573377	0.180203	0.623346
MRPL15	1.408	0.000111514	0.00245804	-0.967826	0.440172	-1.3319	-0.932249	-1.4762	-1.3635	-0.0698464	-0.63326	-0.355963	-0.389265	-0.497725	1.57196	-0.132566	-0.326217	0.179053	0.35627	0.77519	1.7532	1.20287	0.909322	0.158593	0.402841	0.623247	0.811934
MRPL2	0.601357	0.010576	0.0688614	-0.316767	0.28459	-0.443706	-0.287032	-0.340198	-0.451624	-0.319886	-0.0581542	-0.412733	-0.179489	1.66397	-0.273538	-0.463037	0.310845	0.507441	0.257723	0.00409311	0.543876	0.429121	0.373828	0.491128	0.961843	0.30021	0.0381687
MRPL22	0.601302	0.0425037	0.179757	-0.292256	0.309046	-0.570867	-0.358693	-0.503005	-0.469725	0.063328	0.085426	-0.0618273	0.458677	0.393056	0.742376	-0.0405978	0.785735	-0.0606382	1.22192	0.220773	1.16176	1.30816	0.995924	-0.524199	-0.328285	-0.997164	-0.330939
MRPL3	1.51488	4.64053e-06	0.000216243	-1.33655	0.178331	-1.6162	-1.35294	-2.41349	-1.71994	-0.428951	-0.487791	0.0355747	-0.181107	0.308376	0.951683	-0.675126	-0.0604999	0.771589	0.365529	0.636967	0.10616	0.429226	0.393689	-0.566885	0.48825	-0.386077	0.23594
MRPL33	0.678549	0.00106525	0.0132422	-0.548915	0.129634	-0.604042	-0.918066	-0.800903	-0.407976	-0.142652	-0.419852	0.539504	0.336057	-0.0255024	0.834777	0.454666	-0.0433022	-0.266663	-0.529821	0.317317	0.0802667	0.236255	0.144729	-0.252123	0.790884	0.0207979	-0.563697
MRPL36	1.00699	0.00138261	0.0158408	-0.684493	0.322496	-1.27708	-0.7541	-0.97587	-0.949419	-0.117462	-0.0330246	0.00331835	1.02939	-0.454491	0.459037	0.580977	-0.530248	-0.315083	0.293346	0.637264	0.668921	1.13277	0.803175	0.672403	-0.944342	1.16007	-0.0365699
MRPL37	0.620833	0.00498757	0.040524	-0.490018	0.130815	-0.756228	-0.767285	-0.760972	-0.822364	0.0377101	0.129031	0.0165031	-0.0113563	-0.215118	-0.303511	0.135409	-0.35972	-0.628545	-0.0869104	0.429511	0.511176	1.09285	0.294033	0.498479	-0.0639653	0.413281	0.370927
MRPL42	0.760152	0.00179169	0.0192731	-0.420088	0.340064	-0.524081	-0.501983	-0.561949	-0.50021	-0.118696	-0.313612	0.141103	-0.137274	1.2879	0.714091	0.218377	-0.356047	-0.23559	0.317739	0.870891	0.85409	0.420009	0.191931	-0.189185	0.854539	-0.430273	0.91872
MRPL48	0.586766	0.0345422	0.156842	-0.384237	0.20253	-0.989609	-0.203398	-0.65758	-0.503842	0.00995557	0.0390515	-0.330126	-0.0698035	0.868118	1.24062	-0.351318	-0.627921	0.344053	0.561586	0.361116	0.877742	0.829455	0.438026	-0.206336	0.267385	0.0783172	-1.04044
MRPS10	0.671576	0.0470887	0.191651	-0.424151	0.247425	-0.807985	-0.644394	-0.537041	-0.661509	0.063647	0.0423716	-0.715196	-0.0990674	2.7588	-0.0141548	-0.715952	0.00940739	0.520506	0.137551	0.328823	0.177792	0.416028	-0.340614	-0.0547827	0.440265	0.514776	0.594613
MRPS15	0.725724	0.000173462	0.00341574	-0.477031	0.248693	-0.428326	-0.598457	-0.56083	-0.618818	-0.166603	-0.48915	0.296843	0.85618	0.60959	0.404976	0.462024	-0.191284	-0.427512	-0.109058	0.742053	0.33644	0.29055	0.062145	0.439944	-0.396014	0.0785433	0.523668
MRPS16	0.899161	2.6156e-05	0.000805464	-0.743302	0.155859	-1.28866	-0.537295	-0.954865	-1.04228	-0.366389	-0.270327	0.0858972	-0.472744	0.228404	0.0826642	-0.3544	0.592888	0.102654	0.0226118	0.283952	0.490099	0.661898	0.743106	0.138297	-0.275913	0.098171	0.0661619
MRPS17	1.05803	0.000798999	0.0108108	-0.687406	0.370628	-1.28418	-0.797328	-0.727917	-0.875463	-0.12859	-0.310954	0.370819	-0.321695	0.00325869	1.55458	-0.0901818	-0.576129	0.502452	0.118987	1.00605	1.0289	1.25459	1.00274	0.136166	-0.252784	0.605145	-0.412849
MRPS18A	1.11717	2.93508e-05	0.000878987	-0.795049	0.322119	-1.06998	-0.752351	-1.00756	-0.964581	-0.674348	-0.301474	0.361034	0.224291	1.54045	0.242538	-0.1063	-0.60887	0.295262	-0.263459	0.482367	0.481132	0.978198	0.18945	0.0223542	0.851127	-0.0276316	0.491964
MRPS21	0.670753	0.00676193	0.0506757	-0.545637	0.125116	-0.933215	-0.827169	-1.04115	-0.925566	0.160572	0.292707	-0.39955	-0.455903	0.563181	0.666471	-0.353493	-0.292733	0.430396	0.512217	0.0423408	0.220287	0.493551	0.794869	-0.13801	0.525275	-0.378632	-0.228411
MRPS22	0.630973	0.0378124	0.166215	-0.396405	0.234568	-0.747171	-0.586685	-0.697111	-0.649747	0.210346	0.0919377	-0.540555	-0.249856	0.430703	1.37874	-0.504463	0.226354	-0.46408	0.649511	1.34287	0.482367	1.26903	0.49442	-0.606888	0.284121	-0.123075	-0.316105
MRPS26	0.629408	0.00326442	0.0298521	-0.552373	0.0770345	-0.565229	-0.564985	-0.461531	-0.539795	-0.751161	-0.431537	0.616841	-0.643697	0.917203	0.33431	0.0527419	-0.93638	0.00636781	0.149737	0.146112	0.255173	-0.221104	0.261272	0.0225445	0.0766843	-0.4171	0.611846
MRPS30	0.667114	0.0105653	0.0688378	-0.484712	0.182402	-1.03275	-0.585354	-0.873813	-0.546637	0.110219	0.0200616	0.156501	0.414504	-0.738996	0.321858	0.0214864	-1.0254	-0.265869	0.648562	0.318603	0.258102	1.00751	0.549854	-0.0503997	0.629698	0.779748	-0.107317
MRPS34	0.710409	0.0137724	0.0827939	-0.386186	0.324223	-0.60847	-0.346521	-0.525889	-0.678547	-0.154718	-0.0029725	1.16239	0.676813	0.11731	-0.405593	-0.114275	-0.923731	0.0728306	0.325185	0.510072	1.66773	0.655817	0.677489	-0.201697	-0.433843	0.687837	0.713229
MRPS35	0.988934	0.00066628	0.00945102	-0.730389	0.258545	-1.36951	-0.790563	-1.13746	-1.08429	-0.00899099	0.00848347	0.272079	0.118678	-0.195928	-0.0316111	-0.269248	-0.603666	-0.608635	0.209455	1.15209	0.710214	0.664214	0.890593	-0.0576087	0.40821	0.707419	0.770471
MRPS6	0.983154	0.00349992	0.0312439	-0.538879	0.444275	-1.02083	-0.727612	-0.475587	-1.1234	-0.102169	0.216324	0.0700539	0.691284	-0.225146	0.176078	1.5389	-0.337917	-0.148018	0.460873	1.18308	0.780075	1.55458	1.62255	-0.12765	-0.147433	-0.314739	0.331827
MSANTD3-TMEFF1	1.04146	0.0386815	0.168975	-0.435164	0.606291	-0.658247	-0.521089	-0.522326	-0.485873	0.0271986	-0.450647	-0.786677	0.229304	1.86896	-0.465479	0.115626	-0.244959	1.89295	2.18652	0.218039	0.525063	-1.21266	0.779277	1.20737	3.29814	-0.280981	0.370175
MSH2	1.20976	0.000145828	0.00298977	-1.00399	0.20577	-1.44278	-1.10717	-1.43651	-1.04423	-0.221764	-0.771485	0.443365	-1.25099	0.0543176	-0.546931	-0.0523938	0.0509307	-0.00145882	0.546174	0.742376	0.898419	0.671648	0.225454	-0.00321671	1.29172	0.594911	-0.372003
MT1F	1.01338	0.0239788	0.121811	-0.624118	0.389263	-0.853057	-0.875463	-0.523665	-0.469398	-0.0828549	-0.940272	1.07573	2.15829	-0.944772	-0.578639	0.0386511	1.87851	0.63424	0.774345	1.73496	0.020578	0.6391	-1.38059	0.649511	-0.0841283	0.726508	-1.11409
MTCH1	0.786667	0.00199158	0.0209409	-0.670837	0.11583	-0.924295	-0.868228	-1.30671	-1.05183	-0.0520428	0.17809	0.242916	-0.159381	-0.21303	-0.301325	-0.832526	0.492796	1.20666	0.295192	0.272144	0.207684	0.365772	0.376523	-0.313027	0.222499	-0.0136422	0.00402225
MTCH2	0.810131	0.0126645	0.0782091	-0.502503	0.307628	-0.50091	-0.746042	-1.01866	-0.723023	0.106269	-0.132651	-0.125987	0.421684	-0.391981	0.00276286	0.204022	-0.973408	0.550814	-0.864908	0.802959	1.68082	0.812168	1.28554	0.652945	-0.234629	0.670276	0.42897
MTERF3	0.874714	0.00418143	0.0357382	-0.807262	0.0674518	-1.33685	-1.10116	-0.937886	-0.812405	-0.00454364	-0.650719	-1.43651	-0.694888	-0.471841	0.335094	0.218498	0.587435	0.141416	0.227758	0.260363	1.25148	0.439828	0.5111	0.111357	-0.509366	0.581769	-0.474264
MTF2	0.830329	0.00126891	0.0149714	-0.600819	0.22951	-0.830907	-1.02752	-0.637298	-0.78554	-0.130182	-0.193469	-0.216453	-0.451737	0.637447	0.0290109	0.657745	-0.680411	0.284991	0.689469	0.709208	0.0258109	-0.0821136	-0.263068	1.00486	0.792616	-0.24288	0.777668
MTFR2	0.855602	0.000817726	0.0109862	-0.658558	0.197044	-0.170218	-0.875078	-0.255156	-0.636734	-0.767607	-1.24656	-0.497996	0.871788	0.336224	0.32331	0.206661	-0.478712	0.218616	0.0127251	0.96423	0.569412	-0.0473946	0.105853	0.572667	-0.154788	0.872176	-0.722067
MTHFD1	0.776909	0.00284473	0.0271198	-0.506705	0.270204	-0.596936	-0.542639	-0.692562	-0.900805	-0.311099	0.00381083	1.0458	-0.469633	0.0782922	-0.290993	-0.102093	0.748262	0.176946	1.24493	0.010499	0.878917	0.565283	0.396998	-0.272007	0.300838	0.638512	-0.627275
MTHFD2	1.67376	6.97349e-07	4.76994e-05	-1.43516	0.238601	-0.624261	-1.62821	-1.44033	-1.29005	-1.69498	-1.93316	0.0335197	0.441006	0.66799	0.300541	-0.538541	0.348559	0.582621	0.358986	0.29225	0.815504	-0.227526	0.928262	1.27892	-0.276125	-0.545675	-0.642676
MTIF2	0.841702	0.0136586	0.0824822	-0.654715	0.186988	-0.494046	-1.17799	-1.24656	-1.20485	0.230959	-0.0358067	0.954256	-1.25858	-0.125314	0.269133	-1.04481	0.0721995	0.623965	0.191512	1.50341	0.63607	0.307434	-0.0526237	-0.264251	0.91236	-0.211919	0.478953
MTL5	0.637846	0.000794806	0.0107605	-0.415147	0.222699	-0.433264	-0.488712	-0.380281	-0.348206	-0.475269	-0.365151	0.950205	-0.163078	0.55478	0.668921	-0.108133	-0.0296315	0.0450824	0.0852317	-0.0308996	0.517991	0.526585	-0.111371	0.566642	0.45876	0.230893	-0.598795
MTX1	0.614955	0.0186463	0.102284	-0.448086	0.166869	-1.08429	-0.770563	-0.445823	-0.497862	0.103592	0.00642753	0.00721841	0.132063	1.16764	0.447899	-0.0986477	-0.736379	-1.04619	0.340607	0.408877	0.787254	0.480878	0.512073	-0.104525	-0.150262	0.593525	-0.072132
MTX2	1.26043	0.000212302	0.0039848	-1.04652	0.213917	-1.32443	-1.28301	-1.8356	-0.969234	-0.184661	-0.682162	-0.744584	0.214384	-1.20284	0.441953	-0.15869	0.0296408	0.617168	0.302615	0.149584	0.874851	1.24654	0.660606	1.01559	-0.476885	-0.0196346	0.472376
MUC1	2.08603	2.77857e-05	0.000838702	-1.51749	0.568538	-1.62466	-1.66313	-0.607282	-1.65964	-1.67065	-1.87957	0.957893	1.76675	-0.909436	1.77372	0.878917	1.13331	1.11319	-0.803788	-0.0287775	1.67293	1.25148	0.454889	1.42907	-0.134605	-0.98062	-0.478326
MUC16	1.76679	0.00767467	0.0553932	-1.09565	0.671141	-2.80576	-2.0607	-0.957933	-0.914613	0.0874056	0.0776895	1.93633	1.14965	-1.14658	0.604779	1.84704	2.01611	-0.057438	1.75685	-2.30142	2.11014	1.06395	-0.0749128	2.81994	-0.634719	-0.111986	-0.239471
MUC20	0.864214	0.00345485	0.0310475	-0.505788	0.358426	-0.661122	-0.771485	-0.132056	-0.448796	-0.680116	-0.341154	0.64288	1.0224	0.326779	0.11382	-0.6132	0.820722	-0.965068	1.34517	0.0908683	0.873226	1.27316	0.61347	-0.374926	0.309903	0.312987	-0.0573735
MX2	0.972443	0.0336118	0.153777	-0.393831	0.578612	0.6288	-0.780483	-0.409108	-0.742567	-0.429588	-0.630038	-0.144287	-0.376959	-0.845369	0.0891625	2.15125	0.976999	0.929325	-0.300807	1.29785	0.933004	1.99042	1.29172	-0.670986	-0.957343	0.748773	2.14503
MYB	0.966818	0.000263445	0.00470174	-0.709206	0.257612	-0.584517	-0.71416	-0.319701	-0.642676	-1.03334	-0.96084	0.5942	0.468719	-0.684413	0.91466	0.181573	-0.301246	0.514662	-0.0141548	0.80651	0.50615	0.37343	-0.0910184	1.26128	0.358135	-0.628322	-0.138373
MYBL2	0.809413	0.00149288	0.0168179	-0.485033	0.32438	-0.318928	-0.423135	-0.283914	-0.464347	-0.812988	-0.606888	-0.616579	0.333293	1.19529	-0.0996873	0.304278	-0.322203	0.0641685	-0.0151263	0.874851	0.884042	0.360844	0.606459	0.228185	0.578547	1.22192	-0.408207
MYCL	1.50118	0.001991	0.0209409	-0.994415	0.506764	-0.707873	-1.18415	-0.907614	-0.890959	-1.00312	-1.27277	-0.090655	-0.14835	0.179693	2.03941	0.696089	0.244795	0.837923	-0.0617666	2.11782	0.0374299	-0.365774	0.0963424	2.97456	0.551461	-1.57157	0.570821
MYEF2	0.691624	0.0201013	0.107861	-0.413639	0.277985	-0.665657	-0.733713	-0.506487	-0.27438	0.151066	-0.452662	-0.118658	-0.321065	1.36261	-0.597802	0.278742	-0.361754	0.570821	1.02494	0.252668	0.114434	0.173701	0.074506	0.00770795	1.48416	-0.674802	1.17755
MYO10	0.656284	0.0365476	0.162718	-0.588522	0.0677624	-0.890959	-0.732036	-0.38064	-0.735878	-0.796358	0.00474009	-0.384921	0.950205	-0.127182	0.111357	-0.592611	0.573852	-0.459058	0.802724	0.148279	-1.25259	-1.44033	0.361572	0.751703	0.658324	0.375885	0.606987
MYO6	1.01147	0.000235772	0.0043329	-0.85353	0.157936	-1.45232	-1.45775	-0.546172	-0.816507	-0.155627	-0.6928	-0.305372	0.991008	-0.854793	-0.0416601	-0.524781	0.884042	-0.297935	0.486597	0.171779	0.57775	0.160138	0.374223	0.610052	0.241951	-0.0416916	0.095673
NAA38	1.28453	0.00131928	0.0153877	-0.789687	0.494841	-1.22617	-1.1723	-1.11496	-1.16205	-0.1322	0.0695616	-0.0836876	0.0677834	1.55669	1.04393	-0.178398	-0.468742	-0.247652	0.400629	0.538505	1.89295	1.96152	1.03749	-0.180213	0.91872	0.296407	-0.638471
NAA50	1.05297	7.4615e-06	0.000307602	-0.932308	0.12066	-1.0649	-0.9088	-1.19284	-1.50826	-0.365955	-0.553101	-0.0677165	-0.203546	0.00573828	0.422083	-0.155868	0.150894	0.108666	0.1739	0.442494	0.35288	0.230681	0.133487	-0.880224	0.749121	0.588361	-0.120393
NADK2	0.740302	0.00823237	0.058081	-0.585597	0.154705	-0.635242	-0.618818	-0.931554	-0.783634	-0.045335	-0.499001	0.00812824	0.409182	-0.722626	1.05226	-0.21269	-1.20088	0.847666	0.371908	-0.0372783	0.159635	0.580753	0.431738	0.994249	-0.626228	0.176846	0.24262
NARS	0.66085	0.0179565	0.0993441	-0.619439	0.0414115	-0.858151	-0.939864	-1.26299	-1.00976	0.234585	0.119547	0.550249	-0.520065	-0.476756	-0.798381	-0.828588	-0.516674	0.268782	0.49861	0.546666	0.878516	0.531194	0.0315589	0.228689	0.532702	-0.135328	-0.12859
NARS2	0.637462	0.00801673	0.0571055	-0.410107	0.227355	-0.753226	-0.346897	-0.326081	-0.50791	-0.270063	-0.256466	0.40267	-0.0735535	-0.0302702	0.160024	-0.773494	-0.382562	0.77867	0.654493	0.303131	0.937887	0.590644	0.746594	0.790884	0.479922	-0.415517	-0.531849
NCAPD2	1.02297	0.00064812	0.00926916	-0.652284	0.370689	-0.173925	-0.955999	-0.264832	-0.528267	-0.957343	-1.03334	-0.288135	1.51747	1.29785	-0.690938	-0.0248287	-0.190677	-0.0720196	0.0240948	0.00714181	0.68167	0.687202	0.816522	0.0570317	0.978689	0.351285	0.77867
NCAPG	1.9783	8.12821e-05	0.00193319	-1.32437	0.653934	-0.656885	-1.54721	-0.78382	-1.67464	-1.64586	-1.6378	-0.0411995	0.0661131	1.87851	-0.364649	0.512147	-0.269443	-0.159767	0.0689812	0.704919	3.33097	1.09561	0.800269	0.927328	-0.152799	2.03503	0.0309238
NCAPG2	1.0686	8.45135e-06	0.000339836	-0.7968	0.271804	-0.549533	-0.867951	-0.611333	-0.739595	-0.652943	-1.35945	-0.165459	0.403356	-0.325209	-0.106482	-0.321972	0.684477	0.547301	-0.120393	1.09561	0.52983	0.55061	0.440644	0.0217801	0.141367	0.865897	0.107497
NCAPH	1.46903	5.50557e-06	0.00024748	-1.23188	0.237152	-0.948179	-1.07576	-0.421727	-1.30353	-1.94711	-1.69498	-0.356746	0.17219	1.15302	-0.0347825	0.064011	-0.696454	0.0138354	0.050676	0.676813	1.06622	0.223351	0.151269	-0.139978	1.03183	0.717742	-0.298573
NCBP2	1.04835	0.00726126	0.0533195	-0.707937	0.34041	-0.515832	-0.756228	-0.878822	-1.08519	-0.251168	-0.760384	0.708427	-0.536568	-0.0185947	1.81164	0.724694	-1.62821	1.72996	0.453025	1.05893	0.132269	1.15885	-0.00527881	-0.374605	0.599993	-0.544372	0.176395
NCBP2-AS2	1.09345	0.00197991	0.0208627	-0.83064	0.26281	-0.86758	-0.883294	-1.12802	-1.32146	-0.557811	-0.225671	-0.109184	-0.645842	-0.430273	1.56188	0.832052	-1.39422	0.860548	0.360844	0.590148	0.126459	1.53408	0.221315	-0.0355214	0.697897	0.0503686	-0.0155938
NCEH1	1.73975	0.00304853	0.0285511	-1.06601	0.673738	-0.143593	-1.27843	-1.21266	-1.87244	-0.57903	-1.30992	-0.583882	1.49701	-1.81585	1.17879	-0.496048	1.85396	0.312793	2.37949	2.33457	1.53408	1.38496	0.510288	-1.29602	0.603424	1.89295	-0.510702
NCK1-AS1	0.884442	0.00186476	0.0199186	-0.683016	0.201426	-0.589909	-0.681468	-0.729623	-0.68951	-0.824868	-0.582719	-0.943754	0.293969	0.00513367	0.209596	-0.229929	-0.378877	0.0398737	0.24966	1.67565	0.433839	1.33713	0.330903	0.0787297	-0.391341	0.541772	-0.0295333
NDC1	1.30583	1.53207e-06	8.94229e-05	-1.03947	0.266355	-1.05806	-1.2059	-1.04423	-1.04813	-0.861862	-1.01866	-0.536401	-0.515956	0.433199	0.0964958	0.514027	-0.562871	0.573999	0.409464	0.486687	0.903692	0.738735	0.0469864	0.972817	0.220863	-0.189608	0.669548
NDC80	2.39666	5.45606e-06	0.00024748	-2.18003	0.21663	-1.78934	-2.6473	-1.70007	-2.83635	-1.4149	-2.69221	-1.43859	-1.05419	0.790103	-0.334652	-1.38734	0.7377	1.65906	0.355283	0.478478	1.65655	0.692143	0.114523	0.343384	0.457344	1.18816	-0.791893
NDUFA12	0.860848	0.00713721	0.0527282	-0.809558	0.0512907	-0.849437	-0.82453	-2.02619	-1.22894	-0.0561677	0.127916	-0.302607	-0.393097	-0.557948	0.911993	-1.17061	-0.377351	0.260915	0.304109	0.432669	0.37368	0.362228	0.452519	-0.820485	0.483607	0.195315	0.665711
NDUFA13	0.691005	0.0206184	0.109937	-0.51801	0.172995	-0.603666	-0.486382	-1.30353	-1.03275	-0.00173968	0.320013	-0.561779	0.449093	-0.204145	0.547123	-1.09718	-0.38744	-0.01773	0.460332	0.326129	1.03225	0.999202	0.891908	0.61699	-0.481185	0.156894	0.0374692
NDUFA8	0.626717	0.0383956	0.168132	-0.367781	0.258937	-0.213656	-0.431858	-0.951478	-0.71173	-0.037628	0.139666	0.710995	-0.0720196	-0.735023	1.0833	-0.748061	0.0990398	1.01849	0.0557292	0.128881	1.25711	1.40204	0.670799	0.0162233	-0.199674	-0.21336	-0.33149
NDUFA9	0.816269	0.000874814	0.0115365	-0.720453	0.0958162	-1.0289	-0.95443	-1.03572	-1.06429	-0.0573735	-0.182012	0.0342996	-0.0734759	0.0339827	-0.132566	-0.766928	-0.38085	-0.720942	0.146931	0.225077	0.609888	0.897932	0.56783	0.123112	0.390171	0.532702	0.0458962
NDUFAB1	0.792596	0.00275134	0.0265022	-0.728695	0.0639013	-1.34692	-0.817543	-1.27708	-1.25462	0.111634	0.212357	-0.479081	-0.269533	0.0541762	0.514662	-0.368504	-0.0455748	-0.0855126	0.361953	0.494704	0.480878	0.558143	0.6141	0.00406589	-0.735298	0.298635	-0.375393
NDUFB11	0.826926	0.0151736	0.0884738	-0.516679	0.310247	-0.820485	-0.510091	-0.742567	-1.05936	-0.212156	0.244581	-0.10021	0.472029	0.180163	0.918078	-0.158346	0.0553284	-1.34317	0.264222	1.11906	1.78327	1.22978	0.982916	-0.0919477	-0.279323	0.07499	-0.142894
NDUFB9	1.91554	8.7223e-07	5.65344e-05	-1.78745	0.128091	-1.99819	-1.65161	-3.24586	-2.11099	-0.81198	-0.906037	-0.31007	0.878516	-0.328748	1.01515	0.164573	0.0385977	0.591745	-0.284957	0.0258109	0.330222	0.506249	0.175707	0.215588	-0.0652758	0.204154	-1.1078
NDUFS3	0.810856	0.0134591	0.0815962	-0.554024	0.256832	-0.724364	-0.722626	-1.0549	-0.935557	0.0266156	0.0866867	0.149051	-0.00125972	-0.422142	0.121181	0.0613594	-1.1789	0.70322	-0.425473	0.790103	1.40554	1.29919	0.926821	0.577577	-0.752574	0.482097	0.373521
NDUFS5	0.719699	0.0194072	0.105397	-0.768553	-0.0488547	-1.37572	-0.881174	-1.2683	-1.46173	0.071573	0.304039	0.181266	-0.0854098	-0.00665062	-0.0233121	-1.18227	-0.76177	-0.60217	0.218427	1.0224	0.233127	0.394024	0.474601	-0.0651006	-0.497996	-0.666881	0.586043
NDUFS6	1.24906	6.34888e-05	0.00159166	-1.0857	0.163362	-1.06015	-1.20789	-2.21093	-1.67862	-0.343072	-0.0135213	-0.0829787	0.473182	-0.579678	0.693994	-0.400432	-0.649554	0.514776	0.147255	0.54202	0.599469	0.607351	0.527658	0.216572	-0.201045	0.149584	0.0556129
NDUFV2	0.745002	0.0376462	0.165771	-0.595827	0.149175	-1.03334	-0.87711	-0.987881	-0.919803	0.0772234	0.165946	-0.0775649	-1.2757	-0.197147	-0.264629	-1.22617	0.649885	0.212619	0.282014	0.382134	1.44362	1.34165	0.798212	0.128942	-0.262117	1.00646	-0.555405
NEDD1	0.748856	0.00209346	0.0216872	-0.531088	0.217768	-0.498534	-0.990197	-0.79535	-0.555405	-0.000903611	-0.346138	-0.0305529	0.224995	0.63261	0.757043	-0.462816	-0.59621	0.674029	0.398024	0.455972	0.29302	-0.141463	-0.15571	-0.652746	0.852697	0.443218	0.792183
NEIL3	1.46749	2.25147e-06	0.000119799	-1.12309	0.344399	-0.944342	-1.50503	-0.624261	-1.16836	-1.10233	-1.39422	-0.275332	0.515606	1.07127	-0.308686	1.26041	0.0345329	0.50875	-0.0146871	-0.0411995	1.38129	0.0212108	0.311157	0.406421	0.0791608	0.920303	-0.359827
NEK2	1.7054	7.13144e-09	1.29498e-06	-1.57845	0.12695	-1.23534	-1.67862	-1.04923	-1.65623	-2.05253	-1.79876	-0.147548	-0.121	0.0916058	-0.43891	-0.430362	-0.583882	0.636509	-0.0834708	0.376439	0.266002	0.0513021	0.227413	0.76285	0.864799	0.16246	0.396998
NELFCD	0.837349	0.00292567	0.0276723	-0.488714	0.348635	-0.709859	-0.578409	-0.712309	-0.766928	-0.129937	-0.0348417	-0.478326	-0.110369	0.245886	-0.0959708	-0.0735187	-0.315875	0.736146	0.185919	0.715085	1.60183	0.695877	0.972817	-0.153381	1.31705	-0.0847179	0.419712
NET1	1.03582	0.00679653	0.0508684	-0.835394	0.200426	-1.6378	-1.26299	-1.49395	-0.176763	-0.601682	0.160813	-0.124174	-0.913719	0.182863	-0.827917	0.786927	1.86163	0.991996	0.340991	-0.142053	0.434157	0.502679	-1.2757	0.417565	0.126279	0.811292	0.0340088
NETO2	1.33418	0.0101919	0.0670859	-0.578087	0.756095	-0.303269	-0.508265	-0.340005	-0.465266	-0.937399	-0.914318	-0.613018	-0.329597	0.894025	1.37459	0.0892974	-0.161339	2.27155	1.88995	-0.657419	0.202786	0.308493	1.86495	0.164054	1.5307	3.55598	-0.28747
NEU1	0.960842	0.000198589	0.00376759	-0.575511	0.38533	-0.477311	-0.924295	-0.726699	-0.651105	-0.331207	-0.342449	0.0285369	0.69	-0.281457	0.328444	0.161985	-0.300754	-0.0125994	-0.332681	-0.0291334	0.725196	0.541332	1.00935	1.48416	0.770737	0.830711	0.551461
NEURL1B	1.52377	0.000394297	0.00630497	-1.07624	0.447525	-1.06429	-0.708834	-1.58606	-0.981957	-1.3826	-0.733713	0.472493	1.46153	0.0825293	-0.109517	-0.24433	2.43096	0.792616	1.24876	-1.30232	1.57827	0.220098	0.443103	0.0250536	-0.517879	-0.130039	0.709057
NFE2L3	1.28212	0.00903016	0.0619149	-0.618962	0.663153	-0.574463	-0.710941	-0.474398	-0.829277	0.04465	-1.16934	2.23525	2.78277	1.33713	1.07836	-0.243656	-1.11897	0.93575	0.867628	0.419712	0.31967	-0.0198793	-0.276485	1.79816	-0.746446	1.74	-0.498534
NFKBIE	0.589882	0.0215538	0.113147	-0.4045	0.185382	-0.528952	-0.716549	-0.511424	-0.622537	-0.0146238	-0.032914	1.11319	0.342514	1.39462	-0.0871499	-0.103846	-0.757043	0.0651995	0.0780228	0.334648	0.426836	0.478848	0.0207682	-0.558372	-0.53679	0.686384	0.0682813
NGEF	0.690718	0.0119014	0.0747215	-0.349422	0.341296	-0.242027	-0.317623	-0.0742451	-0.0904996	-0.749602	-0.622537	-0.486478	-0.10135	0.0312828	0.933374	0.0257709	-0.225297	1.0289	0.428558	0.17809	0.239479	-0.362543	0.835056	1.96559	0.27395	0.498883	0.19747
NHP2	0.907373	0.00204467	0.0213519	-0.813984	0.0933888	-1.02426	-0.750864	-1.56419	-1.29183	-0.388631	0.135859	-0.788857	-0.883626	0.240062	0.242303	-0.764955	0.0268473	0.591113	0.365604	0.275726	0.674029	0.93138	0.61208	-0.338227	0.472376	-0.115005	-0.0466306
NIP7	0.694558	0.0195491	0.105866	-0.374914	0.319644	-0.398341	-0.224716	-0.436565	-0.790563	-0.247267	-0.152033	0.65858	-0.982938	-0.122605	0.102584	-0.738756	-0.397217	1.25711	0.791955	0.819174	-0.0669315	0.332282	0.264137	0.33206	0.309493	1.12763	1.42775
NIPA2	0.596932	0.0019325	0.0205107	-0.401531	0.195401	-0.505936	-0.6928	-0.537149	-0.462816	0.00569289	-0.216178	-0.0566205	0.674479	-0.246897	-0.137669	-0.103927	0.608087	0.711605	-0.00338575	0.379397	0.66774	0.369759	-0.130119	-0.222052	-0.355886	0.274366	0.697548
NIPBL	0.745953	0.00438135	0.0370373	-0.562917	0.183036	-0.638004	-1.15757	-0.898558	-0.494893	0.192938	-0.381412	0.194575	0.437271	-0.403592	0.633814	-0.111259	-0.269157	0.828679	0.579499	0.150379	0.0124834	-0.0355727	0.223935	0.965134	0.102242	-1.12001	0.740158
NME1	1.23644	0.00278557	0.0267004	-0.975868	0.260575	-1.09787	-0.799444	-1.98126	-1.18542	-0.382651	-0.408568	0.8279	-0.307935	0.657051	0.057286	-0.441645	-2.36839	1.23135	-0.0480695	0.365691	1.02427	1.05403	0.460216	0.952664	0.600838	0.423996	-0.320039
NMI	0.959787	0.0111691	0.0715424	-0.922182	0.0376051	-0.78382	-0.99515	-1.28593	-1.62119	0.144439	-0.991439	1.0312	-0.128118	-1.94112	0.351575	0.303577	1.10017	0.166396	0.0386876	0.665711	0.584155	0.718718	-0.233991	-0.64149	-1.31823	-0.350492	0.254926
NMU	1.42017	0.0146937	0.0864342	-1.11578	0.304386	-1.75285	-1.23657	-2.73095	-1.03506	0.110741	-0.0500001	-1.20923	2.16538	1.40877	1.73187	-1.48673	0.256028	-0.518519	0.730024	-0.659446	0.780505	0.63424	2.43096	0.232759	-0.506627	0.404065	-1.52388
NOL11	0.638681	0.0132276	0.0807058	-0.679137	-0.040456	-1.30068	-0.690403	-1.23215	-0.961993	0.152727	-0.0423273	-0.86621	0.457953	0.0507663	-0.0964062	-0.283237	-0.855214	-0.61238	0.179163	0.12349	0.679894	0.534954	0.246555	0.28113	0.0316006	0.112694	-0.632048
NOL7	0.64092	0.046125	0.18896	-0.576133	0.0647864	-0.723891	-0.710376	-1.11813	-0.861596	0.0695616	-0.112365	0.243299	-1.87957	-0.257604	0.531356	-1.02004	0.500047	1.00751	0.117776	0.57665	0.269451	0.85078	0.0205455	-0.0619807	0.626984	-0.110777	-0.377846
NOLC1	0.718321	0.000530745	0.00797861	-0.561066	0.157255	-0.967461	-0.709018	-0.605004	-0.491961	-0.17728	-0.415674	0.93575	-0.629831	0.52297	0.199403	0.21731	-0.402368	0.695197	0.151186	0.512338	0.217369	0.166786	-0.136209	0.26595	-0.0987456	0.248281	-0.349309
NOP10	0.62604	0.0259767	0.128431	-0.522618	0.103422	-0.799444	-0.994315	-0.646596	-0.756487	0.0475934	0.0135389	-0.177062	0.315023	0.499157	-0.282388	0.758611	-0.442451	-1.19474	0.036339	0.316854	0.450763	1.0655	0.441697	-0.110806	-0.974547	0.682803	0.269987
NOP16	0.638112	0.00021965	0.00409583	-0.484263	0.153849	-0.695674	-0.396014	-0.473276	-0.529654	-0.384053	-0.426909	-0.283691	-0.138373	0.717742	0.300675	0.0564721	0.0870818	0.599993	0.288042	0.116143	0.342744	0.568349	0.387878	-0.451737	-0.303638	-0.0953533	0.269251
NOP2	0.723389	4.95073e-05	0.00133106	-0.58868	0.134709	-0.540555	-0.572388	-0.580007	-0.407845	-0.664001	-0.767285	0.433839	-0.174096	0.708023	0.249294	-0.0851587	-0.414237	-0.546931	0.0846388	0.112236	0.291	0.57046	0.343679	0.0514717	-0.118282	0.327699	0.321712
NOP58	1.38161	5.13105e-06	0.000235268	-1.26413	0.117482	-1.76727	-1.87957	-1.65623	-1.22617	-0.1186	-0.936912	0.164007	-0.125314	-0.26337	0.064731	-0.206079	0.659613	0.619083	0.71922	0.497897	0.237858	0.17574	0.266736	-0.722373	-0.729946	0.0615796	0.460332
NOTCH3	0.829994	0.000388933	0.00624915	-0.6148	0.215194	-0.699765	-0.598632	-0.348642	-0.600929	-0.775175	-0.665657	-0.647447	-0.0959118	0.676006	0.607923	-0.305917	-0.0904996	0.305849	0.120581	0.426331	1.37713	0.477149	0.149357	0.257039	0.610644	-0.142824	-0.282309
NOV	1.42695	0.00777979	0.0559402	-0.690018	0.736934	-0.44143	-0.568117	-0.0596273	-0.831693	-0.985868	-1.25337	-0.46408	-0.102781	0.661234	0.512495	-0.234472	3.52174	-0.463267	0.967124	-1.01164	1.62477	-0.61863	0.697548	1.69419	2.33457	1.77372	0.898419
NOX4	1.17964	0.00680544	0.05091	-0.657369	0.522267	-0.544501	-0.519333	-0.465375	-0.448182	-1.22894	-0.73788	-0.282972	-0.687583	0.551899	1.64872	2.06409	0.0231107	0.758611	-1.13467	-0.156518	0.763732	2.1051	0.0612798	1.49471	1.43721	0.183686	-0.474137
NPM3	0.790617	0.00419529	0.0357962	-0.501056	0.289561	-0.755362	-0.445901	-0.544622	-0.855506	-0.143469	-0.261474	1.20877	-0.720699	1.05403	0.48287	-0.143555	-0.496491	1.17879	0.119099	0.892719	0.439828	-0.0705911	0.0503686	0.630281	0.444701	0.0587699	-0.495916
NPTX2	1.27174	0.0262556	0.12941	-0.560668	0.711071	-0.217346	-0.267112	-0.343072	-0.347812	-1.12978	-1.05889	0.182739	1.00049	-0.466963	-0.630563	-0.280923	2.15829	0.145274	0.718718	0.232759	-1.13364	0.576512	3.29814	-0.160281	3.71653	1.25808	0.761965
NR2C2AP	0.622929	0.00443847	0.0374179	-0.337571	0.285358	-0.394136	-0.433843	-0.640446	-0.491842	-0.0925129	0.0273519	-0.34238	0.47145	-0.279763	-0.0732546	-0.102415	0.280727	0.891908	0.49617	0.267909	0.275459	1.07337	-0.134675	0.695197	-0.269822	1.03677	0.279071
NR2F6	0.674236	0.000279887	0.00492601	-0.592159	0.0820767	-1.07742	-0.661744	-0.504463	-0.640446	-0.361227	-0.307656	-0.669764	-0.0442532	0.192382	-0.194321	-0.301325	-0.420999	-0.0521721	0.119684	0.600162	0.472251	0.125242	0.498197	0.263432	0.179111	0.263432	0.282168
NRARP	0.849402	0.00125369	0.0148727	-0.521322	0.328081	-0.546172	-0.729385	-0.579165	-0.593508	-0.0243026	-0.655397	-0.200847	-0.0803429	0.398262	1.30683	-0.312956	-0.251065	1.65348	0.246851	0.900579	0.236255	0.706469	-0.06102	0.140344	0.046961	0.121948	0.397538
NRAS	1.04609	2.25626e-05	0.000724028	-0.831019	0.215068	-0.772419	-1.02204	-1.22894	-0.944342	-0.300294	-0.718076	-0.400946	0.535743	0.71048	0.0247687	-0.566731	-0.190291	0.280453	0.29433	1.10564	0.0227901	0.611118	0.0517623	0.759668	0.140105	0.311157	-0.248948
NRBF2	0.618175	0.0265871	0.130623	-0.294712	0.323463	-0.480881	-0.338136	-0.526857	-0.530393	0.355966	-0.247971	-0.488477	0.759905	-0.165719	-0.31316	1.7532	-0.177389	-0.129285	0.186242	1.41967	0.436038	0.673045	0.437133	0.407339	-0.264679	0.64269	-0.00115124
NRTN	1.47317	0.00600552	0.0465468	-0.672262	0.800908	-0.906037	-0.54288	-0.278834	-0.387367	-0.892315	-1.02614	-0.769915	1.57196	-0.354083	1.69713	2.38987	0.208209	-0.127221	1.30142	3.67957	0.205484	0.362779	-0.131338	-0.665042	0.86513	0.486687	2.09387
NSMCE2	0.625118	0.023531	0.120284	-0.547351	0.0777668	-0.85429	-0.569158	-0.817915	-0.92032	-0.1527	0.0302748	-1.20197	0.103407	-0.0702023	1.23627	0.593525	-0.295727	-0.184715	0.0512491	0.179693	0.0913726	0.813349	0.429363	-0.0382399	-0.511424	0.736146	-0.687836
NSUN2	0.897999	0.000382213	0.00619931	-0.637257	0.260741	-0.53008	-0.935557	-1.24793	-1.01417	-0.0577503	-0.0380605	0.423819	0.776171	-0.444189	-0.348206	-0.120094	-0.134295	1.10779	0.371143	0.0825797	-0.248189	0.248472	0.347411	0.792183	0.133082	0.445136	0.739044
NTHL1	1.12508	0.00480069	0.0395962	-0.88477	0.240306	-0.970644	-1.07327	-1.34692	-1.02426	-0.618454	-0.27508	0.666867	0.11126	0.549041	-0.725508	-0.438337	-1.55335	0.125981	0.441074	0.509409	2.29785	0.627499	0.974984	-0.894693	-0.133341	0.976259	0.309903
NUBP2	0.625006	0.0104598	0.068338	-0.384397	0.240609	-0.835251	-0.557811	-0.440454	-0.515686	-0.206841	0.24966	-0.0291481	0.530723	0.803175	-0.548604	-0.249217	-0.640598	-0.0491495	0.594042	0.709453	1.05698	0.320745	0.669035	-0.237628	0.00155414	0.815752	0.102618
NUDCD1	0.717422	0.0122733	0.0764115	-0.357138	0.360284	-0.613398	-0.473382	-0.71121	-0.213172	0.346182	-0.477846	0.178863	-0.454906	-0.365346	-0.242999	1.23448	0.264653	0.957893	0.0861619	0.0556129	0.779552	0.989461	-0.214813	0.0117527	1.00222	1.54935	-0.0673786
NUDT1	0.705192	0.00203647	0.0212905	-0.497715	0.207477	0.0310458	-0.731168	-0.78773	-0.708167	-0.482482	-0.307787	0.359146	-0.652209	0.940747	-0.0557429	-0.166796	-0.693933	-0.00535364	0.237602	0.714632	0.76469	0.267909	0.615325	0.139469	0.404065	0.50841	-0.0583285
NUDT15	1.31348	5.77537e-05	0.00148975	-1.06715	0.246328	-1.63159	-1.15664	-1.11409	-1.31475	-0.679367	-0.506487	-0.0328622	-0.292353	0.678927	-0.534982	-0.685276	-0.626688	0.812444	0.109149	1.64412	0.531356	0.249742	0.463977	0.0164689	0.919912	0.0132804	0.674029
NUDT16L1	0.672584	0.0234464	0.119985	-0.487753	0.184831	-0.626934	-0.688265	-0.950989	-0.789706	-0.0294905	0.158868	0.369759	0.0704441	0.0895406	-0.250934	-0.57903	-1.3578	0.730227	0.548404	0.859366	1.03047	0.162553	0.808926	-0.162303	-0.130511	-0.27508	1.04327
NUDT19	1.25899	0.00336549	0.0305251	-0.739456	0.519535	-1.18415	-1.08623	-0.802636	-1.23296	0.0216297	-0.152394	-0.0886161	-0.231749	-0.48166	0.61964	0.529154	1.59734	0.657432	0.671037	0.437947	3.04591	0.920692	0.00604716	0.542714	-0.511173	1.26128	-0.663438
NUF2	3.62738	1.69589e-10	7.05489e-08	-3.45021	0.177173	-2.77232	-3.42101	-3.54383	-3.93959	-3.08491	-3.93959	-1.22617	0.295972	1.33067	-0.318037	-0.431625	-1.46899	0.79319	0.496428	0.712034	0.96423	0.216222	0.428859	0.361034	0.904487	0.566431	-0.789968
NUP155	1.01963	0.00105687	0.0131562	-0.637043	0.382583	-0.528267	-0.859947	-1.0254	-0.663251	-0.400712	-0.344676	0.117538	0.0449248	-0.14708	0.000511048	-0.372338	-0.23588	1.09088	-0.0232819	0.642486	0.0746802	0.831087	0.320247	1.79292	-0.259113	0.554464	1.68927
NUSAP1	1.84526	5.21309e-08	6.44617e-06	-1.59763	0.24763	-1.09039	-1.98875	-1.04228	-1.93316	-1.57549	-1.95573	-0.661509	0.334944	1.04889	-0.520624	-0.0504983	0.765347	-0.107357	0.525754	0.495488	0.797852	0.591581	-0.619016	0.415286	0.487034	0.548574	-0.0896626
NXN	1.21207	0.00225849	0.0228849	-0.881944	0.330123	-1.51602	-1.41122	-1.04481	-1.03902	-0.367381	0.0867882	0.444822	1.81829	0.169281	-0.0454422	-0.162303	1.30683	-0.581639	0.586897	0.686782	2.00911	0.452794	0.363063	-0.427674	-0.0218799	-0.481031	-0.835934
NXT1	0.834558	0.0035433	0.0314838	-0.539398	0.295159	-0.807515	-0.545675	-0.603058	-0.772419	-0.383399	-0.124324	0.0171509	-1.09244	1.08055	0.0983995	-0.283177	-0.413726	0.445024	0.811934	0.870494	0.708427	0.879667	0.451349	-0.17505	0.114807	1.26041	-0.051269
NXT2	0.590889	0.00375547	0.0328837	-0.342889	0.248001	-0.324955	-0.396796	-0.366732	-0.433843	-0.259363	-0.275641	-0.0209116	0.717525	0.152396	0.851605	0.278536	-0.0907082	0.179636	0.162158	0.304702	0.171657	0.473438	0.421139	-0.548863	-0.697111	0.784134	0.828679
OCIAD2	1.17258	0.000964101	0.0123095	-0.802768	0.369817	-1.35945	-1.12723	-0.934963	-1.11298	-0.0937143	-0.188278	0.80353	0.467158	0.547123	0.419646	-0.0859018	-0.737212	-0.964009	-0.148507	0.0414311	1.5389	0.327492	1.23135	0.746772	-0.126622	1.60735	0.248568
OIP5	1.5551	2.07996e-06	0.000112457	-1.31872	0.236374	-0.944772	-1.40184	-0.971347	-1.60738	-1.43363	-1.55335	-0.825733	0.079714	0.87257	-0.11917	0.463863	-0.428951	0.38861	0.0242423	1.12636	0.827379	1.19692	-0.611127	0.348227	0.121469	0.555871	-0.238264
OR7E14P	1.1828	0.00597298	0.0464205	-0.719152	0.463645	-0.506046	-0.840014	-0.35473	-0.666472	-1.30816	-0.639483	0.805904	2.26658	-0.559245	0.111304	-0.0782054	0.0981342	0.157975	-1.03572	2.08304	0.217559	1.52626	0.563181	0.981914	-0.492127	1.39114	-0.619386
OR7E37P	1.25399	0.00031857	0.00540317	-0.791907	0.46208	-0.830298	-0.939351	-0.513163	-0.771783	-0.652615	-1.04423	-0.20956	0.0757228	0.117538	-0.526857	-0.0919205	-0.259113	1.31997	0.636241	1.74249	0.233461	0.62099	1.33067	1.39731	0.680633	1.00322	-0.677525
ORC1	0.586738	0.00171942	0.0186802	-0.421323	0.165415	-0.429251	-0.279637	-0.170218	-0.345241	-0.553566	-0.750027	0.0849252	-0.275586	0.476725	-0.465375	1.07888	-0.237342	0.230494	0.0724438	-0.0160619	0.0444716	0.362887	-0.0723453	0.276117	0.721742	0.348349	0.0163071
ORC4	0.758827	0.00750128	0.0544855	-0.508436	0.250391	-1.02342	-0.631181	-0.656885	-0.675822	-0.02436	-0.0389496	-0.557055	-0.11959	-0.0912913	0.098171	1.65906	-0.556199	0.420268	0.636719	0.292308	0.63424	1.21082	0.431459	-0.276125	-0.164307	-0.192986	0.580753
ORC6	1.37554	2.89178e-06	0.000146057	-1.17801	0.197531	-1.2139	-1.51602	-0.555897	-1.28418	-1.08987	-1.4082	0.0710344	-0.4399	-0.058522	-0.0121214	-0.00603752	-0.250456	1.3111	0.862149	0.894025	0.182166	0.180066	0.136313	-0.356047	-0.0221984	0.960436	-0.291512
ORMDL2	0.647911	0.00247912	0.0244703	-0.424492	0.223419	-0.610983	-0.560252	-0.554991	-0.319457	-0.0907897	-0.410481	-0.0705911	0.152818	0.757535	-0.0551613	-0.105751	-0.767285	0.33629	-0.35277	0.465439	0.57111	0.40804	1.10017	0.373521	0.117014	0.654493	-0.0101759
OSBPL11	0.666582	0.00347637	0.031143	-0.431016	0.235566	0.0126316	-0.862829	-0.734008	-0.661912	-0.10748	-0.232498	-0.00173968	-0.288934	0.393774	0.865897	0.320174	0.0212726	-0.364132	1.05963	0.971572	0.066859	0.27586	-0.304208	-0.329292	0.515061	0.0552993	0.511968
OTUD6B	0.982837	0.00126673	0.0149703	-0.903296	0.0795407	-0.926964	-1.29602	-1.57913	-0.767894	0.0174753	-0.867241	-1.18849	-0.479843	-0.676798	0.141995	-0.317991	0.0656658	1.11244	0.451983	0.607185	0.772149	0.0939335	0.0591569	-0.537041	0.183828	0.406726	0.57775
OVOL2	0.863301	5.28595e-05	0.00139322	-0.681531	0.18177	-0.805331	-1.14658	-0.388863	-0.557391	-0.961513	-0.229509	-0.0629489	-0.388631	-0.0366891	0.838808	0.746772	-0.203586	-0.0771221	0.607923	0.251762	0.586791	0.209596	0.0305083	-0.0415227	0.46682	0.260979	-0.281136
OXLD1	0.995912	0.0011079	0.0136211	-0.644853	0.351059	-0.717163	-1.11109	-0.757043	-1.09718	-0.123185	-0.0634554	0.0397191	0.864799	0.0167076	1.06447	0.32366	-0.256129	-0.104135	-0.0153072	0.58722	1.3323	1.10712	0.477511	0.996575	-0.782563	0.48287	-0.517879
OXR1	0.903462	0.00111025	0.0136352	-0.579301	0.324161	-0.599399	-0.765943	-0.98062	-0.703398	-0.0797449	-0.346698	-0.157545	0.340529	0.0307447	0.109066	1.13459	0.521831	1.76985	0.262075	0.365063	0.24262	0.0389497	-0.418131	0.230775	0.298186	-0.572517	0.990494
OXTR	2.5818	0.0047503	0.0393081	-0.880762	1.70104	-0.750864	-1.4082	-0.980202	-0.456128	-0.272855	-1.41633	4.61668	4.07088	0.40275	-0.321218	3.09569	3.25794	0.235346	5.13774	-0.107516	-0.519635	-1.08896	2.41774	4.07088	0.862149	1.71305	-0.626934
P2RY2	0.780126	0.00346695	0.0310951	-0.451984	0.328141	-0.248189	-0.47888	-0.266147	-0.0540731	-0.832091	-0.832526	-0.241636	0.52089	0.561586	2.14503	-0.0156724	0.547803	0.035759	-0.0294269	-0.312325	-0.0220621	0.347411	0.774618	0.112885	0.261272	0.369013	0.195118
PABPC3	0.787544	0.00259136	0.0253717	-0.739385	0.0481587	-1.04352	-0.956952	-1.54721	-1.20923	0.111137	0.209455	-0.264679	-0.284459	-0.206769	0.621629	0.163685	0.136556	0.78296	0.230136	0.281391	0.475268	0.341231	0.0144993	-0.108923	-0.273757	-0.373049	-0.765179
PABPC4L	1.12339	0.0315018	0.147063	-0.500169	0.623226	-0.680775	-0.623229	-0.284395	-0.587743	-0.318103	-0.506769	0.455549	-1.02141	1.59245	-1.05936	0.739044	0.831408	1.33353	1.07494	0.446897	-0.274615	-0.934493	-0.781846	1.12384	3.45059	0.70591	2.28916
PACSIN3	0.878135	0.000356041	0.00588599	-0.675425	0.20271	-0.952497	-1.11024	-0.764013	-0.854793	-0.444891	0.0738832	0.16246	-0.177206	-0.519635	0.909637	0.087751	-0.265413	-0.0991754	-0.493109	0.761407	0.505587	0.400884	0.619513	0.185197	-0.130546	0.451599	0.844416
PAICS	0.770447	4.30868e-05	0.00119422	-0.555793	0.214655	-0.802977	-0.533602	-0.748353	-0.710941	-0.0765413	-0.462341	0.617772	0.433076	0.350473	-0.559584	-0.429846	-0.0508358	0.311157	-0.0113043	0.350473	0.316901	0.234237	0.37368	0.444032	0.0378383	0.487158	0.529249
PAIP1	1.16515	0.00012185	0.00263941	-0.960931	0.204221	-1.29928	-1.12978	-1.65161	-1.14752	-0.131476	-0.405922	-0.709018	-0.162852	-0.547456	0.663605	-0.462465	-0.654247	0.796281	0.478599	0.474601	0.24215	0.467613	0.256758	0.932168	0.74546	0.259656	0.486687
PAK1IP1	1.4664	0.000412578	0.00652369	-1.14308	0.323317	-1.0525	-1.23534	-1.46173	-1.34317	-0.817543	-0.948179	0.109097	-1.65161	0.942661	0.995924	-0.44807	-1.08987	1.28157	0.580977	1.79292	0.607923	1.20984	-0.184715	-0.164741	0.58492	0.181953	0.424285
PAK2	0.588872	0.00309543	0.02879	-0.374243	0.214629	-0.412023	-0.535811	-0.382897	-0.533602	-0.0858597	-0.295264	-0.0113563	-0.0586827	-0.373636	0.82234	0.50568	-0.767607	0.628629	0.621135	0.624117	0.162719	0.488651	0.0951758	0.00971758	0.597615	0.0742264	0.0153399
PAK6	0.826994	0.000186283	0.00359676	-0.612438	0.214556	-0.414352	-0.477022	-0.266911	-0.564639	-1.23215	-0.719554	-0.309317	0.332427	-0.35715	0.349078	0.357719	0.829882	-0.343554	-0.113583	0.692143	0.425223	0.743623	0.176601	0.0781921	-0.345972	0.205302	0.712289
PALB2	0.643719	0.00265118	0.0258124	-0.391075	0.252644	-0.470365	-0.629454	-0.701772	-0.576802	0.0303074	0.00163574	-0.185123	-0.367065	-0.129855	-0.0683362	0.00832386	0.218675	1.33801	0.678927	0.202367	0.278881	-0.0947836	0.438095	0.625522	0.0507663	0.740522	0.307378
PALM3	1.19454	0.00283976	0.0270883	-0.81043	0.384111	-0.684632	-0.78382	-0.698832	-0.535968	-1.44278	-0.716549	-1.26505	0.789849	-0.472632	0.245495	-0.23757	1.49121	-0.0987854	0.234729	2.14503	0.678501	0.512147	0.833012	0.111137	1.11619	-1.00709	1.0696
PANK1	2.00011	1.32288e-07	1.29349e-05	-1.85896	0.141151	-1.94112	-2.03562	-1.75771	-1.77196	-2.02619	-1.62119	-0.844089	0.0586861	0.631527	-0.534499	0.408877	0.582013	0.899808	0.175707	0.567267	0.540113	-1.05116	-0.0612054	0.354898	1.22192	-0.915343	0.223895
PARP1	0.826677	0.00587328	0.0459421	-0.765332	0.0613444	-0.925977	-0.843659	-1.3389	-0.956428	-0.0843336	-0.442692	-1.16934	0.0828933	0.569572	0.249874	-0.0829145	-1.36512	-0.207026	0.224598	0.0404259	0.604966	0.514555	0.443577	-0.628322	0.944677	0.203544	0.555558
PARPBP	1.11867	8.34639e-05	0.00197482	-0.896336	0.22233	-0.640598	-0.970644	-0.696454	-0.565725	-1.02614	-1.47846	0.143725	0.41721	1.06237	-0.515216	0.167559	-0.859732	1.33067	0.247615	0.465959	0.741387	0.0482841	-0.057438	-0.361853	0.535133	0.171779	0.0198319
PAX8	0.872086	3.1337e-05	0.000921583	-0.681943	0.190143	-0.583567	-0.625514	-0.206567	-0.600721	-1.04988	-1.0254	-0.230565	0.198796	0.0262956	0.245431	-0.280071	-0.179937	0.28772	0.149627	0.0103361	0.243824	-0.058441	0.680633	0.487948	1.2046	0.0368909	0.219207
PAXIP1-AS1	1.52314	0.000228991	0.0042355	-1.34319	0.179949	-1.94711	-1.48489	-2.15552	-1.79876	-0.385964	-0.286869	0.0937158	0.886983	-1.35569	0.133082	-0.33743	0.991996	-0.467958	0.233588	1.13543	0.153333	1.3323	0.702148	-0.14995	-1.09244	0.12998	0.490099
PBK	2.31521	6.77584e-05	0.00167783	-2.0244	0.290805	-2.09136	-2.1006	-2.36839	-2.02619	-1.68744	-1.87244	0.384753	0.581769	0.112383	-1.666	-1.71483	-1.70007	-0.176226	0.38324	0.132763	0.860826	2.16538	0.704919	1.80724	1.65906	1.44665	-0.328976
PCBD1	0.824091	0.00109273	0.0134853	-0.624281	0.19981	-0.92032	-0.541149	-0.988435	-0.919273	-0.400151	0.0236414	-0.483232	-0.437111	-0.0861384	-0.0139139	-0.41085	0.604012	-0.132463	0.0976417	0.528084	0.31917	1.23853	0.818875	-0.136993	0.00666614	0.621883	0.662792
PCCB	0.868941	8.73533e-05	0.00204779	-0.586133	0.282808	-0.469265	-0.816042	-0.514673	-0.65758	-0.557539	-0.501699	-0.311018	0.285107	0.102543	1.19692	0.407621	-0.0565742	-0.393173	-0.111845	0.444032	0.58316	0.766155	0.520506	0.19096	0.678118	-0.317907	0.540318
PCDH19	1.37221	0.0132487	0.0807326	-0.788145	0.584069	-0.250758	-0.640133	-0.518959	-0.727917	-1.29183	-1.29928	-0.0380605	-0.399984	0.966741	0.279961	1.05403	-0.262781	0.665247	2.97456	0.0664677	2.22686	-0.685461	3.19964	-0.00592088	0.1465	-1.56043	0.717742
PCDH7	1.15435	0.00221023	0.0225558	-0.662432	0.491921	-0.630211	-0.978255	0.185534	-0.570205	-0.823882	-1.15757	0.612967	1.4111	-0.808375	0.0926312	-0.44758	1.62255	0.30572	0.156792	0.633309	0.260155	0.773711	1.76985	-0.347173	-0.609076	1.2847	1.15947
PCDHB2	1.59791	0.0335677	0.153606	-0.673694	0.924219	-0.766492	-0.502319	-0.261474	-0.380163	-1.13847	-0.993253	1.41967	-1.0796	3.88712	-1.11298	1.98655	0.926155	3.16628	0.575129	0.133264	4.74808	0.794164	-1.192	-0.336243	-0.861596	0.211004	1.52251
PCNA	1.39688	5.4399e-05	0.0014176	-1.0487	0.348182	-1.34161	-1.17161	-1.17161	-1.5829	-0.477311	-0.547163	-0.54776	-1.00382	1.32815	0.129486	-0.156931	-0.375664	0.645667	1.0011	0.625726	0.848137	0.4309	0.276455	0.843005	1.19692	0.603008	-0.273473
PDCD10	1.08753	0.00350201	0.0312504	-0.964416	0.123113	-1.27416	-1.10233	-1.52674	-1.08243	-0.0946708	-0.706162	-1.49395	-0.670189	-0.229371	1.21082	-1.52136	0.329416	0.488039	0.278965	0.920692	0.643464	1.06086	0.316986	0.491414	0.260293	0.125088	-0.241354
PDCD2L	0.639755	0.0127343	0.0785126	-0.414819	0.224936	-0.43128	-0.0926724	-0.316202	-0.323075	-0.512342	-0.813344	-0.181605	-0.411464	0.0637904	-0.00637336	0.126568	-0.158035	0.509316	0.223973	0.0140011	2.07844	0.721742	0.578051	0.0512763	-0.0611108	0.224152	-0.173752
PDE9A	0.895241	0.000122906	0.00265542	-0.647154	0.248086	-0.466628	-0.604827	-0.250024	-0.584341	-1.15888	-0.818228	0.288748	-0.101874	-0.147189	0.606004	-0.0530201	-0.0509102	0.233127	-0.00722708	0.38247	0.0243729	-0.454906	0.73513	0.917203	0.539287	-0.11674	1.1749
PDHA1	0.86579	0.0363921	0.162342	-0.53113	0.33466	-0.866919	-0.764354	-0.820485	-0.765943	0.051333	-0.0204097	0.985466	1.79568	-1.23296	-0.209315	1.21715	0.532355	0.3652	0.526486	1.17755	1.68637	1.07888	0.305408	-1.11172	-0.669276	-0.463461	-0.629248
PDHX	0.685737	0.0133654	0.0812001	-0.49887	0.186867	-0.729385	-0.936014	-0.856718	-0.725685	0.269809	-0.015228	-0.35059	0.207993	-0.772956	0.494223	-0.131524	-0.582902	1.16928	0.141956	0.878516	0.739907	0.758804	0.0615414	0.0351176	-0.447499	-0.0422933	0.830297
PDIA4	1.08096	0.000901262	0.0117954	-0.7986	0.282363	-0.826813	-1.15088	-1.0302	-1.20387	-0.124365	-0.455472	1.21162	0.0849593	-0.509941	-0.920729	-0.478601	0.85371	0.592044	0.141995	1.00431	0.365772	0.226599	0.374731	-0.171317	0.412088	-0.271267	1.60183
PDIA6	0.863529	0.0146449	0.0862486	-0.625483	0.238045	-0.551286	-0.981508	-1.24164	-1.09965	0.0728664	0.0483192	1.51222	-0.826047	-0.41871	0.349714	-0.639483	-0.579574	0.481991	0.0965821	0.700527	0.484575	0.603798	0.377821	-0.721825	1.09946	-0.237276	1.52495
PDP1	1.23385	0.00103881	0.012988	-0.81104	0.422805	-0.289213	-0.926964	-0.866919	-0.788517	-0.909436	-1.08519	-0.510091	-0.166942	-0.751773	0.710049	0.318681	2.716	0.612225	0.476441	0.0236826	0.320174	-0.0473677	0.67281	0.757297	0.0440158	1.54413	0.0455511
PDRG1	0.789275	0.00170828	0.0186212	-0.529218	0.260057	-0.431021	-0.346138	-0.800553	-0.512911	-0.530595	-0.554089	-0.354003	-0.622365	0.687991	0.743623	-0.286345	-0.425822	-0.0118667	0.212096	0.57247	1.40481	0.000792388	0.559747	0.395376	0.960436	0.101238	0.222747
PDS5A	0.633491	0.00985762	0.0657175	-0.379634	0.253858	-0.44519	-0.74195	-0.568481	-0.393906	0.166263	-0.294537	-0.0553851	0.517855	-0.337281	-0.341408	-0.155671	0.558618	0.349364	-0.263505	0.346514	0.900257	0.125659	0.835288	0.650773	-0.820818	0.79319	0.958274
PEA15	1.19075	0.000350562	0.00581643	-0.934658	0.256094	-1.25099	-1.29928	-1.05889	-0.866919	-0.374835	-0.757043	0.586554	-0.0764171	-0.978255	0.676813	1.30683	0.574774	-0.149551	0.129682	0.405867	0.465171	0.358525	1.59076	-0.664863	-0.749809	0.0680057	0.553419
PEBP1	0.899874	0.00566654	0.0447825	-0.747705	0.152169	-0.869104	-0.793835	-1.17306	-1.2712	-0.596396	0.217369	0.658693	-0.500331	-0.941869	-0.77426	0.382965	-0.688971	0.627812	0.368027	1.16069	0.669035	0.514662	0.671795	-0.898908	0.660097	0.0350466	0.490216
PEX13	1.01954	1.55187e-05	0.000539615	-0.738755	0.28079	-0.627776	-0.717626	-1.10567	-0.867951	-0.462585	-0.65092	0.638927	-0.385085	-0.110594	0.23242	-0.545987	-0.140095	0.623719	0.146812	0.390171	0.400461	0.00811297	0.291794	1.11564	0.872901	0.501834	0.451599
PFDN2	0.918917	0.000622367	0.00898407	-0.902838	0.0160784	-1.24506	-1.0796	-1.40184	-1.11409	-0.413108	-0.163337	0.0855798	-0.681983	0.501735	-0.149911	-1.01351	-0.918066	0.338245	0.0863959	0.177478	0.39689	0.318681	0.444481	0.262267	0.38418	0.463127	-0.438337
PFDN4	0.644814	0.0027492	0.0264961	-0.529205	0.115609	-0.586274	-0.54196	-0.667957	-0.730216	-0.30854	-0.340285	-0.77618	-0.0783794	0.599618	-0.379365	0.00559077	-0.755561	0.565596	0.405148	0.763131	0.255555	0.402608	0.40876	-0.0184638	0.439751	0.255463	-0.243535
PFKP	1.11802	7.37949e-06	0.000305875	-0.937038	0.180985	-0.940272	-0.92647	-0.708167	-0.898156	-1.09559	-1.05358	1.1222	0.0222758	-0.725685	-0.446617	-0.0665142	0.271013	0.00741289	-0.185939	0.0615796	0.345077	0.328568	0.829063	0.0390515	0.0553284	0.383066	0.855883
PFN1	1.05007	0.00019733	0.00374993	-0.740224	0.309844	-0.370008	-0.746446	-1.44723	-1.24281	-0.284509	-0.350338	0.79765	-0.057438	-0.396014	0.131569	-0.453308	-0.196777	0.483501	0.058034	0.41917	0.716169	1.48416	0.731605	-0.0973935	0.573297	0.743623	0.0196534
PGP	0.702221	0.00704112	0.0521651	-0.447571	0.25465	-0.734756	-0.633687	-0.334796	-0.673265	-0.121755	-0.187166	0.157793	0.821328	0.623522	0.360761	-0.236283	-0.66775	0.495898	0.15817	0.612563	0.919143	0.255133	0.759668	-0.426579	-0.670738	1.19959	-0.287818
PHIP	0.695208	0.0127204	0.0784693	-0.479627	0.215581	-0.68061	-1.12884	-0.526177	-0.404565	0.010522	-0.14809	-0.30465	0.594362	-0.330477	0.73513	-0.22417	-1.13147	0.470411	1.47043	0.607572	0.531698	-0.106732	0.176021	0.809875	0.232094	-0.123797	0.0429981
PIGU	0.760442	0.0333265	0.153051	-0.513301	0.247141	-1.07576	-0.406968	-0.655999	-0.80494	-0.121385	-0.0147543	-1.01118	-0.54196	1.22978	-0.0217359	-0.564139	-0.775465	0.0625984	0.365063	0.106323	2.17377	0.507441	0.66774	0.220607	1.27316	0.309903	-0.0476537
PIGW	1.34872	0.000283048	0.00497017	-1.0962	0.252522	-1.19075	-0.92032	-1.51342	-1.37414	-0.284248	-1.29432	-0.718252	-0.208691	0.755454	0.281583	-1.43363	0.00938457	1.20166	-0.00585377	0.476567	1.2046	0.137416	0.415365	1.32974	0.139414	0.991996	-0.536401
PIGX	0.607341	0.0054719	0.043621	-0.358666	0.248675	-0.366021	-0.486158	-0.377351	-0.579375	-0.0324154	-0.310678	-0.286289	0.247173	-0.280668	1.36361	0.387143	-0.371817	0.922091	0.34875	0.655644	0.216843	0.663159	0.271577	-0.249544	-0.116159	0.0345002	0.172785
PIK3R3	0.891059	0.00165476	0.0182111	-0.631093	0.259966	-0.306744	-0.554676	-0.197695	-0.818564	-0.919273	-0.989609	0.843346	0.463977	0.30572	-0.986554	-0.081471	0.781177	-0.00751048	-0.290245	0.338245	0.32586	0.193488	0.39689	1.13386	-0.386326	-0.239834	1.36884
PIPOX	0.977774	0.028121	0.136001	-0.454231	0.523543	0.560769	-0.485125	-0.0247951	-0.469164	-1.44521	-0.861862	1.1749	0.682224	0.921359	0.366556	2.25907	-0.921661	0.0857377	2.353	-0.407534	1.86163	-0.20794	0.494847	-0.207461	-0.0893446	-0.616355	0.627669
PKM	0.603237	0.00650529	0.0492951	-0.398236	0.205001	-0.45559	-0.594765	-0.407976	-0.622365	-0.205453	-0.103269	0.175422	0.504058	-0.375579	-0.284911	-0.219017	-0.0751284	-0.685461	0.399896	0.424965	0.817536	0.841045	0.662116	-0.340198	0.138744	0.818047	0.478478
PKN1	0.993886	0.00643535	0.0488685	-0.719017	0.274869	-0.590039	-0.752016	-0.993253	-0.869594	-0.578248	-0.530951	-0.64817	-0.197386	-0.284631	0.343103	-1.19398	-1.18415	0.762201	0.315891	0.89447	2.08304	0.520001	0.641486	0.16702	0.532125	0.973183	0.673705
PLAG1	1.93837	0.00119147	0.0143479	-1.61252	0.325852	-2.00514	-1.73067	-1.11024	-1.63538	-1.93316	-1.26053	0.157322	0.874475	-0.200232	0.522355	-0.189161	0.788925	0.644785	2.2447	2.46683	0.902573	-3.1631	0.0962155	0.30195	1.51547	-1.05737	-0.692098
PLAGL2	0.691941	0.000378854	0.00616076	-0.463154	0.228786	-0.476885	-0.417467	-0.220005	-0.276993	-0.717388	-0.670189	-0.0767557	0.10171	1.09561	0.431	0.714321	-0.363057	0.259207	0.319523	0.440397	0.371143	-0.0269992	0.291482	-0.340987	0.581149	0.00117614	-0.138339
PLCB4	1.14642	0.0111618	0.0715357	-0.669955	0.476465	-0.543033	-0.990917	-0.486382	-0.537041	-0.511943	-0.950414	-1.12723	0.416828	1.44665	0.37413	-0.644394	-0.999658	1.92321	0.484575	1.42341	0.536789	-0.838768	1.40481	0.0431492	2.27894	-0.113628	1.01464
PLEKHF2	1.50809	1.37802e-05	0.000495739	-1.12857	0.379523	-0.771783	-1.28866	-1.52388	-1.10389	-1.11813	-0.965068	-0.226431	-0.284911	-1.03844	1.05368	1.22978	1.2781	0.598072	0.141067	0.579892	1.17557	0.178583	0.77137	0.738471	-0.562248	0.311317	0.128498
PLEKHG4B	0.841912	0.0029389	0.0277745	-0.485711	0.356201	-0.242399	-0.481783	-0.17058	-0.314669	-1.0867	-0.618135	0.992447	0.183431	1.4874	-0.616125	0.0241251	0.0895406	0.389428	0.704919	0.576512	-0.564295	0.157793	0.121083	0.129349	1.21918	-0.21856	1.02299
PLK4	0.674643	0.000298616	0.00518387	-0.498932	0.175711	-0.222336	-0.427122	-0.282238	-0.501983	-0.525717	-1.0342	0.590481	-0.270327	0.697346	-0.420892	0.313067	-0.365774	0.14922	0.0800681	0.24841	0.327812	-0.0599356	0.0164535	0.74463	0.368333	0.268287	0.124199
PLS1	1.66119	7.94406e-05	0.00190126	-1.14727	0.513919	-1.48673	-1.6162	-0.570359	-1.11496	-0.716243	-1.37915	-0.937399	0.00776508	0.326404	1.01326	-0.337588	1.74802	-0.0187702	0.210346	-0.28887	1.49121	1.40481	0.208372	2.12361	0.480878	0.844079	-0.0534334
PMVK	0.658734	0.00802622	0.0571553	-0.442046	0.216688	-0.394473	-0.411829	-0.792547	-0.947113	-0.220703	0.114388	0.0977421	-0.182434	-0.377993	0.115857	-0.0291481	0.312215	-0.56448	-0.0414237	0.0889088	0.424385	0.727616	1.43601	0.314697	1.16565	-0.0278791	0.00728799
PNO1	0.674157	2.47395e-05	0.000776462	-0.528058	0.146099	-0.486569	-0.520471	-0.539071	-0.556909	-0.406418	-0.658908	0.302252	-0.379838	-0.0504983	0.52089	0.0319978	-0.406232	-0.223982	0.0986612	0.544049	0.305078	0.465171	0.131569	0.194853	0.215283	0.44147	0.146861
PNP	1.30227	0.00117653	0.0142354	-1.07745	0.22482	-0.573226	-1.54007	-0.772646	-0.817915	-1.11172	-1.64912	-1.11109	-0.158113	0.100493	0.0831221	0.88152	-0.541813	0.38001	-1.57913	0.602889	0.477896	0.66799	1.44502	0.626129	1.34517	1.0531	-0.676058
PNPT1	1.11795	0.000853578	0.0113217	-0.862982	0.254966	-1.09965	-1.46393	-0.956952	-0.775792	-0.0190632	-0.862501	0.714321	-1.39692	-0.0342441	0.104899	-0.218388	-0.459626	0.463008	0.31602	1.69178	0.791955	0.628469	-0.040507	-0.243656	0.76639	0.525665	0.470298
POC1A	0.822626	0.000113136	0.0024866	-0.643074	0.179551	-0.508877	-0.638214	-0.29558	-0.483606	-1.12723	-0.80494	0.0511072	-0.0197423	-0.0213955	0.269626	0.104622	-0.180673	0.312067	-0.54214	0.460122	0.703556	0.917203	0.772817	0.0709892	-0.0296315	0.366653	-0.362358
POLD1	0.778082	0.00455554	0.0381378	-0.669952	0.10813	-0.779098	-0.925977	-0.323913	-0.419981	-0.682671	-0.888073	-0.420892	-0.559019	0.620657	0.00163574	0.16515	-0.0635385	0.232482	0.578919	0.329352	0.431459	1.17196	0.387551	-1.07174	0.396149	0.528248	-0.998304
POLD2	0.85079	0.0114863	0.0730001	-0.595828	0.254962	-1.26053	-0.582533	-1.06915	-0.876327	0.0588488	0.154729	1.04651	0.434695	-0.0628311	-0.061631	-0.368259	-0.503153	-0.207716	0.57793	1.47043	0.717525	1.50712	0.740799	-0.350783	-0.642506	0.367392	-0.586128
POLE	0.626367	0.00274463	0.0264743	-0.546985	0.0793818	-0.32186	-0.701931	-0.471726	-0.676058	-0.625895	-0.484442	-0.00390912	0.0640564	0.425832	-0.883294	-0.284723	0.00675829	-0.433947	0.390377	0.752011	0.416637	-0.0167749	0.042117	-0.411562	0.361572	0.866838	-0.0218799
POLE2	1.27039	2.02648e-05	0.00067197	-0.836356	0.434036	-0.831693	-0.963449	-0.422029	-0.7541	-0.899344	-1.14752	0.0226958	-0.440585	1.06296	-0.40952	1.09285	0.788622	0.28029	0.744975	1.00486	1.02375	0.176601	-0.0857389	-0.166004	0.657191	1.24944	-0.0577914
POLR1C	0.861009	0.00868341	0.0602415	-0.468569	0.39244	-0.827616	-0.65092	-0.684068	-0.599553	-0.0562598	0.00700408	-0.19175	-0.381348	1.67784	-0.0707384	-0.629454	-0.495204	1.66138	0.292308	0.535437	0.352573	0.679894	0.267603	0.433076	1.47043	-0.168048	0.845045
POLR2D	0.827473	3.29031e-06	0.000161204	-0.597435	0.230037	-0.992641	-0.742567	-0.683775	-0.653082	-0.128404	-0.384143	-0.0707076	0.163685	0.30459	0.214714	-0.0240414	0.520111	0.619513	0.000955478	0.395751	0.450875	0.48302	-0.0862754	0.493551	0.316312	0.241212	-0.342667
POLR2H	1.26142	5.85485e-05	0.00150364	-1.00328	0.258136	-1.36512	-1.33509	-1.22119	-1.54437	-0.384921	-0.169004	-0.344115	-0.743266	-0.112081	1.21258	-0.570867	0.191326	0.931013	0.50291	0.521959	-0.0513821	0.91164	0.0525337	0.611434	0.690353	0.0264491	0.299689
POLR2K	1.12433	0.00172463	0.0187011	-0.960071	0.164261	-1.14231	-0.76177	-1.72428	-1.21964	-0.515832	-0.396595	-1.48673	-1.01866	0.394384	0.905598	1.0696	-0.396676	0.932552	0.0117527	0.22299	0.514929	0.703556	0.265218	1.19348	-0.258872	-0.0460606	-0.378877
POP7	1.20379	0.000586873	0.00859645	-0.780689	0.423104	-1.192	-0.760384	-0.997759	-1.18227	-0.481876	-0.0698464	-0.318263	0.115376	0.0681699	-0.319758	-0.119212	0.39411	-0.643961	0.456804	0.929687	1.25459	1.42907	1.05893	0.353159	0.436491	1.92321	-0.248729
POR	1.4046	0.000681325	0.00959896	-0.91486	0.489738	-0.940715	-1.1632	-1.08519	-1.26166	-0.631433	-0.406968	0.770737	2.20185	-0.592951	-0.893625	-0.156386	0.418157	0.212479	0.191656	1.67293	1.32438	1.40554	1.30988	0.492225	-0.58468	-0.125658	0.189262
POU2F3	1.07642	0.00611362	0.0471929	-0.678663	0.397754	-0.595977	-0.665493	-0.558194	-0.621388	-0.933215	-0.697709	0.80154	0.976259	-0.828934	0.35357	2.62953	1.53568	0.360395	0.258802	0.175214	0.870891	0.970696	0.275526	-0.433171	-0.271194	-0.707873	-0.602861
PP7080	0.826672	0.00351051	0.0312531	-0.568767	0.257904	-1.2059	-0.602456	-0.401801	-0.821256	-0.369921	-0.011274	0.0469143	0.775522	-0.697411	0.454128	0.139227	-0.315373	-0.115984	0.585065	0.193916	0.712529	0.815253	1.10946	0.7377	-0.962901	0.807912	-0.159486
PPA1	0.914042	0.00149128	0.0168081	-0.681655	0.232387	-1.05889	-0.603207	-1.44915	-1.13147	0.184172	-0.0313873	0.043646	0.026904	-0.338379	1.59076	-0.166492	-0.314297	0.688396	0.223834	0.366556	0.478599	0.698408	0.77867	-0.142824	0.095496	-0.0331828	-0.277909
PPAT	1.00591	0.000744204	0.0102947	-0.78176	0.224152	-1.24793	-1.35569	-0.739231	-0.677525	-0.16754	-0.502648	0.987024	0.545599	-0.143981	-0.714346	-1.0525	-0.215575	0.303794	0.00916357	0.414414	0.424601	-0.0875773	0.0929812	0.929687	0.225261	0.723008	1.14488
PPCDC	0.616544	0.0136593	0.0824822	-0.462831	0.153713	-0.442965	-0.616947	-0.784809	-0.787034	-0.360603	0.215371	0.441953	0.495107	0.0615034	-0.569867	0.445136	-0.173319	-0.679367	-0.415984	-0.23856	0.726259	0.88152	0.599809	0.202524	-0.606064	0.874851	0.413905
PPCS	0.733382	0.0295337	0.140748	-0.516546	0.216836	-0.592322	-0.61406	-1.01709	-1.2342	0.227351	0.13105	0.811934	-0.00225663	-0.964581	-0.0735535	-0.194468	-0.287381	-0.357713	0.390988	1.10779	0.200268	0.599054	0.334712	0.726725	-0.5435	-0.284017	2.00537
PPIAP21	0.596507	0.000678334	0.00957128	-0.393053	0.203454	-0.334978	-0.395901	-0.494893	-0.437111	-0.257747	-0.437689	0.248194	0.634046	0.0013523	0.641146	-0.0879268	0.191615	0.721742	-0.0826327	0.222448	0.095294	0.245546	0.128543	0.955197	-0.259477	-0.193791	-0.206038
PPID	0.815965	0.00390366	0.0338831	-0.642149	0.173816	-0.665945	-0.634032	-1.06561	-0.907091	-0.188994	-0.391222	0.0544792	-1.11298	0.0528368	0.859768	0.367771	-0.705589	1.3669	-0.587032	0.110588	0.160661	0.116595	0.481388	0.854539	0.447602	0.0403959	0.273134
PPIF	1.02605	0.000241972	0.00441863	-0.756721	0.269325	-0.969234	-0.847305	-0.757839	-0.842987	-0.555405	-0.567557	1.14556	-0.00601459	-0.186615	0.0677834	-0.00936365	0.362969	0.0915122	-0.715952	1.14804	0.612967	0.619083	0.241481	-0.235537	-0.654392	0.970696	0.856985
PPIH	0.749479	0.00379534	0.0331188	-0.535219	0.21426	-0.60969	-0.531568	-0.672781	-1.14977	-0.195817	-0.051693	0.381678	0.0256365	0.0813994	-0.103846	-0.0856975	-0.816915	0.710214	0.285826	1.18726	0.0800681	0.261744	-0.352985	0.683058	0.519398	-0.475738	1.04707
PPM1G	1.07788	0.000158412	0.00319056	-0.784514	0.293371	-1.04923	-0.914613	-0.952497	-0.918066	-0.6132	-0.259477	1.15504	0.0706414	1.24944	-0.147219	-0.757301	-0.181497	0.55225	-0.0495669	0.770471	0.632118	0.180488	0.201409	-0.545675	0.922091	0.522616	0.118628
PPP1CB	0.748491	0.00209199	0.0216872	-0.670227	0.0782638	-1.12256	-0.949419	-1.09122	-0.804132	0.0697604	-0.123797	0.533858	0.708427	-0.0671483	0.297601	-0.0704133	0.788364	-0.528632	0.18897	0.376183	0.246078	0.186393	0.0582889	-0.581038	-0.167293	-0.830598	0.113181
PPP1R14B	1.01673	0.00352238	0.0313466	-0.694044	0.322686	-1.05419	-0.86621	-0.836332	-1.3389	-0.0244705	-0.0441631	1.38129	-0.135361	0.0168146	0.613908	-0.934963	-0.461685	0.425895	0.507315	0.666471	1.0312	1.32974	1.02124	-0.381348	0.161512	0.774896	-0.853952
PPP1R14C	1.54077	0.00469853	0.0390128	-0.984995	0.55578	-0.515562	-1.25462	-0.662747	-0.251546	-1.40964	-1.81585	-0.510189	2.02615	-0.378569	0.100126	0.488764	-1.22384	2.16538	-1.48895	2.04685	0.329416	0.0884818	0.806781	2.59202	-0.190419	0.966199	1.07426
PPP1R16A	1.24363	0.000330612	0.00556616	-0.979955	0.263675	-1.86597	-0.937399	-0.923224	-1.27708	-0.683775	-0.192276	0.221984	0.0907362	-0.213113	0.291537	-0.260798	-0.121423	-1.18015	0.396998	0.458677	1.14902	1.75685	0.663605	0.969867	-0.233422	0.0723635	0.15607
PPP1R35	1.07684	0.000445558	0.00692083	-0.744711	0.33213	-1.18101	-0.982938	-0.926964	-0.934963	-0.353743	-0.0886481	0.0643294	0.749694	0.000416359	-0.682671	-0.265413	0.562713	0.979707	0.269626	0.877742	0.427	0.889826	0.978689	-0.491013	-0.340099	1.39329	-0.0997566
PPP1R9A	0.599799	0.0320472	0.148791	-0.354477	0.245321	-0.81497	-0.827917	-0.283505	-0.27142	0.0735433	-0.00259454	-0.201045	1.33067	-0.202691	-0.467689	-0.559742	0.582954	1.5307	0.792943	0.225497	0.0767623	-0.274903	0.0677834	0.0593042	0.974529	-0.0950086	0.0850776
PPP4C	0.823621	0.000250254	0.00452634	-0.620385	0.203236	-0.666472	-0.793529	-1.08107	-0.706775	-0.339502	-0.134962	-0.368348	-0.126079	0.282804	0.212357	-0.592449	-0.252449	0.132868	0.356656	0.552475	0.778014	0.151987	0.787254	0.753915	-0.285784	0.425076	0.443478
PRADC1	0.631845	0.00583761	0.0457826	-0.32826	0.303585	-0.247067	-0.308597	-0.253094	-0.397622	-0.0641082	-0.699073	-0.110126	0.753272	0.215745	0.839749	-0.60205	0.646694	-0.344115	0.0428246	0.69485	0.519398	1.28554	0.607923	0.488039	-0.135229	0.0355113	-0.0806676
PRAME	2.48257	0.00197525	0.0208266	-1.60367	0.878895	-1.85194	-2.06915	-0.617957	-1.46899	-2.1006	-1.51342	-2.5762	0.705658	1.44872	3.77456	2.21752	-1.65964	-0.215575	-0.269157	1.34614	2.09978	1.07836	0.0964958	3.35883	2.84776	-1.2798	1.08887
PRC1	2.51311	2.20217e-07	1.90855e-05	-1.8819	0.631202	-1.40319	-2.21093	-1.34011	-2.23005	-1.78934	-2.31781	0.867255	0.578229	0.711605	-0.254424	0.0814798	-0.173096	0.05985	-0.013792	1.09166	1.26903	1.98655	-0.257666	2.40924	0.35835	1.59576	-0.210803
PRCC	0.831723	0.00120824	0.0144859	-0.675176	0.156547	-1.10116	-0.534499	-0.928241	-1.28593	0.00179605	-0.203015	0.183974	-0.442692	0.396998	-0.23457	0.0890076	-0.836332	-0.163793	0.197088	0.476725	0.611846	0.434766	0.889826	-0.392177	0.238816	0.156333	0.898942
PRDX6	0.698908	0.00488007	0.0399199	-0.634964	0.0639442	-1.2275	-0.774525	-1.2151	-1.02752	0.207897	0.226964	0.109582	-0.514537	-0.216556	0.110588	-0.337505	-0.629454	-0.0467951	0.666471	0.320174	0.395645	0.750663	0.590016	-0.0771474	0.0232613	-0.017587	-0.103714
PRELID1	0.707288	0.00785221	0.0562488	-0.529728	0.17756	-0.823621	-0.606888	-0.794636	-0.67728	-0.252729	-0.0232148	-0.419981	0.261961	0.24164	0.248194	-0.59156	0.227624	0.0767623	0.272452	0.1485	0.99006	1.47401	0.698894	-0.699073	-0.547163	0.523405	-0.0647605
PREX2	0.954564	0.00486106	0.0398324	-0.62333	0.331234	-0.500331	-0.537949	-0.162473	-0.391045	-1.14305	-1.00513	-0.0544444	0.85078	-0.158754	0.302081	-0.506355	1.25459	0.886983	0.0187661	0.611434	0.281583	-0.46857	-0.88157	0.92445	1.11089	-0.54776	1.67565
PRIMA1	1.5905	7.02411e-05	0.00172817	-1.40058	0.189922	-1.45775	-1.65964	-1.49604	-1.34011	-0.878361	-1.57157	0.599618	-0.364764	-0.146229	0.622213	0.184676	0.947236	1.29588	1.23448	0.285351	0.769085	0.0187355	0.186343	-0.938874	-0.774525	-1.67464	0.794164
PRKCD	1.26157	0.000184197	0.00356852	-0.901962	0.359606	-0.337816	-1.36828	-0.603528	-0.958848	-1.32306	-0.820234	0.137293	-0.00953794	-0.647614	0.27482	1.61329	-0.235096	0.343765	0.0940569	0.784604	1.7179	1.14284	0.427534	-0.0503657	0.6787	-0.352146	-0.166346
PRKCI	1.14393	0.00754661	0.0547452	-0.774533	0.369395	-0.990197	-1.13935	-0.956428	-0.898908	-0.0650296	-0.597291	0.302002	-0.301767	-0.797328	1.07074	0.32397	0.716023	2.81994	0.512147	1.28157	0.785938	0.398157	-0.125045	0.226964	0.78296	-1.39422	-0.691725
PRKX	1.92613	0.000137993	0.00287287	-1.36925	0.556883	-0.214063	-1.79876	-0.941266	-2.00514	-1.63159	-1.62466	2.353	-0.105968	-0.69602	-0.708328	2.17823	1.09462	0.390171	1.48067	0.639489	0.529683	1.39329	1.07573	-0.666881	0.670674	-0.792776	0.074556
PROM2	0.602222	0.00437385	0.0369958	-0.471293	0.130929	-0.382062	-0.454015	0.231116	-0.478063	-0.85429	-0.890443	0.182351	0.959333	-0.229068	-0.0974905	0.0474935	1.03677	-0.349467	0.0322498	-0.0557041	-0.113715	0.163419	-0.375272	-0.118233	0.286749	0.255808	0.469635
PRORSD1P	1.36427	0.000640059	0.00919307	-0.77918	0.585094	-0.688504	-0.841859	-0.622223	-0.792776	-0.796978	-0.932737	-0.161339	-0.740185	0.0504885	1.70203	-0.0631555	0.62005	1.30569	0.577346	1.65348	-0.655397	0.0085919	0.971953	0.890905	1.22978	-0.187025	2.15829
PRR11	0.971943	0.000254565	0.0045898	-0.780267	0.191676	-0.539071	-1.12802	-0.5781	-1.36512	-0.412023	-0.659264	-0.279515	1.14284	0.324422	-0.165459	-1.0314	0.246603	0.541332	0.666678	0.734925	0.536014	0.35754	0.0600955	-0.0939637	0.084243	0.340991	-0.398536
PRSS2	1.48788	0.00221785	0.0226033	-0.702671	0.785214	-0.524486	-0.504463	-0.503472	-0.367381	-1.25259	-1.06364	0.0200922	0.0361824	1.80384	0.125386	1.18308	0.975423	-0.516194	-0.0708134	1.31457	2.08635	-0.221638	2.79614	2.61841	0.846405	-0.215678	-0.21813
PRSS21	1.6931	0.00128208	0.0150817	-1.15428	0.538821	-0.523796	-0.992641	-0.735023	-1.13304	-1.63538	-1.90582	2.70568	1.07494	0.992447	0.0319672	-0.305122	0.401456	2.19193	1.09285	0.199317	-0.19483	1.36121	1.3033	-2.13081	-0.367538	0.373204	-0.108883
PRSS8	1.12613	0.00440358	0.0371785	-0.747367	0.378762	-1.2757	-1.25611	-0.396676	-0.797328	-1.16205	0.403665	-0.25434	-0.427754	1.27725	0.0494234	0.0244981	0.0898672	-0.452882	0.0245369	-0.332163	2.65575	-0.0999481	0.716169	0.894884	-0.060607	1.05016	0.905349
PSAT1	2.7423	1.91748e-07	1.72047e-05	-2.21031	0.531991	-2.28616	-1.6378	-2.1837	-2.41349	-2.48397	-2.25673	-0.8861	-0.149445	0.754332	0.982916	-0.901162	-0.0837711	2.14503	0.933699	1.31806	0.822991	-0.549805	0.227164	1.99042	1.47231	0.430028	0.00517394
PSENEN	0.829171	0.00715265	0.052788	-0.735125	0.0940459	-1.01773	-0.965953	-1.02947	-0.868228	-0.427194	-0.102169	-0.807515	-1.06288	0.0641192	-0.0937578	-1.05659	-0.441763	0.274243	0.225883	0.0647894	0.559937	0.535743	1.0458	1.2879	0.028164	0.450491	0.430176
PSMA4	0.881569	0.00307535	0.0286848	-0.734718	0.146851	-0.950414	-0.91629	-1.48489	-1.3319	0.172785	0.102398	1.37059	0.0601883	-0.488581	0.640684	-0.172432	0.444932	-0.120514	-0.0267661	0.580468	0.420367	0.817536	-0.191022	-0.532633	-0.569867	0.0678652	0.0488001
PSMA7	0.674004	0.0330673	0.152168	-0.330291	0.343713	-0.292353	-0.343162	-0.849437	-0.690605	0.160705	0.0331066	0.0487161	-0.153867	0.388471	0.0504885	-0.198073	-0.435412	-0.0100533	0.369966	1.70203	1.56436	1.06515	1.30469	-0.367445	0.163886	0.612563	-0.606064
PSMB5	0.971167	0.00595757	0.0463606	-0.62079	0.350377	-0.611127	-0.653285	-1.44278	-0.957933	-0.229596	0.16998	0.541881	-1.21964	-0.0502171	1.24876	-0.235942	-0.504397	0.351575	-0.0646306	1.17647	0.582621	0.950205	1.80082	0.415693	-0.0813328	-0.0176997	0.711862
PSMB6	0.700262	0.0262471	0.12941	-0.590371	0.109892	-0.511424	-0.768885	-1.2757	-1.21148	0.0668889	0.158381	-0.842987	0.161174	-0.127693	1.14965	-1.28764	-0.055252	0.789066	-0.193043	0.365919	0.315023	0.80154	0.624117	-0.639866	0.715085	0.209708	-0.226543
PSMD14	1.10372	0.000317547	0.00540025	-0.79245	0.311273	-1.06703	-1.2312	-1.24506	-1.2139	0.0746802	-0.072205	-0.242233	-0.159237	-0.512791	0.39675	-0.341334	-0.0746566	0.437271	0.592231	1.08374	0.740799	0.911993	0.520111	1.16239	-0.515686	0.599219	0.381807
PSMD2	1.1313	0.00153685	0.0172031	-0.980086	0.151216	-1.31475	-1.22617	-1.62466	-1.482	-0.329823	0.0968904	-0.735502	-0.653285	-0.569867	1.75685	-0.444597	0.220375	0.574774	0.403271	0.726508	-0.0625026	1.06447	0.358525	0.218462	0.100258	0.182658	-0.720942
PSME4	0.623342	0.00161468	0.0178905	-0.442909	0.180433	-0.464781	-0.832958	-0.665248	-0.568343	-0.0265537	-0.0995704	-0.0388461	-0.322586	0.26987	-0.282714	-0.332163	0.515923	0.664564	0.0989484	0.704625	0.366183	-0.30239	0.0279835	0.281203	0.809875	-0.0350529	0.461501
PSMG3	0.749107	0.0318047	0.148025	-0.594417	0.15469	-1.14475	-0.702194	-0.831239	-1.04923	0.0905361	0.0703803	0.719879	-0.985388	0.740158	0.736882	-0.660944	-1.00756	-0.063569	0.0885688	1.43182	0.997848	0.301886	0.954738	-0.294537	-0.822854	0.611259	-0.273152
PSPH	0.786691	0.0213186	0.112337	-0.297928	0.488763	-0.509227	-0.41035	-0.302607	-0.438211	-0.151673	0.0244981	-0.25854	0.384336	1.38382	-0.0535273	-0.191532	1.53234	0.205337	-0.0173174	2.65575	0.12308	0.250916	0.57247	0.361179	-0.0618273	1.11505	-0.181321
PSRC1	1.36532	0.000124283	0.00268011	-1.18028	0.185039	-0.691725	-1.57913	-0.764354	-1.1789	-1.18015	-1.68744	-0.796358	-1.1518	1.36361	-0.153425	-0.101903	-1.03275	1.13114	0.673705	0.696976	0.457416	0.370927	0.196136	0.546808	0.572369	0.0936363	0.09414
PTBP2	0.640833	0.0172937	0.0965782	-0.330635	0.310198	-0.39955	-0.627776	-0.39747	-0.23856	0.087934	-0.408388	0.172434	-0.638979	1.34395	0.0284394	-0.102819	-0.256845	0.780075	0.677892	0.0702841	0.648762	-0.233525	0.312433	0.512748	1.68637	-0.24968	0.211621
PTDSS1	1.08801	0.000838733	0.0111701	-0.914007	0.174002	-0.686762	-0.835251	-1.821	-1.52674	-0.43856	-0.175729	-1.04988	-0.04843	-0.051605	1.02986	-0.673467	0.403665	1.42114	0.269987	0.218082	0.636241	0.226209	0.40479	0.550412	0.191016	-0.409586	-0.33439
PTH2R	3.12427	0.00155774	0.0173859	-2.8025	0.321771	-2.6473	-2.24627	-3.93959	-2.30142	-2.90813	-2.77232	0.981914	1.66397	0.718257	0.304702	-3.93959	-0.319292	2.95939	1.3669	1.05572	1.61502	-2.45963	-3.93959	1.92714	2.81043	-1.71483	2.11782
PTK2	0.653368	0.0119877	0.0750421	-0.380037	0.273331	-0.508039	-0.581371	-0.484799	-0.527506	-0.16007	-0.0184381	-0.106269	0.695629	-0.529216	0.187357	-0.33287	1.15129	-0.575093	0.0703135	0.395003	0.315383	0.733575	0.537489	1.6178	-0.0276038	0.264782	-0.0242712
PTMA	0.624306	0.00735102	0.0537335	-0.660807	-0.036501	-1.01934	-0.808676	-1.25337	-1.0796	0.0818924	0.114258	0.418347	0.0919377	-0.238686	-0.260238	-0.512173	0.177172	0.555279	0.340071	0.382351	0.109066	0.0271347	-0.465818	0.0618476	-0.0100274	-0.944342	-0.315937
PTPLB	0.740537	0.0231895	0.119208	-0.534801	0.205735	-1.00976	-1.2151	-0.910671	-0.685276	0.421684	0.190316	-0.683775	0.256337	-0.393097	0.085125	-0.554221	1.66138	0.554464	0.985036	0.670519	-0.00566463	0.137365	0.0317859	-0.728193	0.381096	-0.163375	1.05698
PTRH2	0.683738	0.00301585	0.0283146	-0.579295	0.104443	-1.00312	-0.621535	-0.745281	-0.628712	-0.189808	-0.287315	0.783764	-0.127382	0.157182	0.158541	0.120677	-1.06703	0.321274	-0.026462	0.0272322	0.738735	0.583365	0.151987	0.127801	-0.435307	0.630736	-0.474031
PTS	0.784748	0.016004	0.0916974	-0.594917	0.189831	-0.942598	-0.944772	-0.752884	-0.5382	0.0782172	-0.469265	-1.12068	0.219423	-0.249374	-0.0862101	-0.30465	-1.07327	0.765347	0.0762586	0.651601	1.19262	0.512338	1.06766	1.19529	-0.513695	0.684477	0.020155
PTTG1	1.96437	8.46428e-07	5.53322e-05	-1.62527	0.339106	-0.706364	-1.93316	-1.26667	-1.98126	-1.795	-2.06915	-0.0820642	0.655644	1.32246	-0.0132302	-0.23559	0.687991	0.416203	0.507738	-0.00186219	1.31457	1.21634	0.741387	-0.0333757	-0.372069	0.507441	-1.2059
PTX3	2.92507	0.000514425	0.00777413	-1.63908	1.28599	-1.19691	-1.75285	-1.12978	-1.78934	-2.36839	-1.59718	-0.64233	3.83501	2.20185	2.3235	-1.65623	-1.2712	2.49842	2.70568	3.83501	0.190316	-0.672526	2.04685	3.38992	1.62255	0.613715	-0.444695
PUF60	1.62159	6.38637e-06	0.00027622	-1.47286	0.148729	-1.65161	-1.51862	-2.33094	-1.70919	-1.09039	-0.536401	0.206895	-0.476465	-0.0524358	0.179636	0.687991	-0.765388	-1.12068	0.0517193	0.157863	0.952664	0.846176	0.727046	1.03183	0.203436	-0.207892	-0.0427317
PUS1	1.07317	0.00211514	0.0218386	-0.86497	0.208195	-1.12169	-0.955569	-0.528632	-1.05358	-0.722373	-0.807985	0.675388	-0.508505	-0.0180893	-0.659687	0.153185	-0.760384	-0.0322458	0.442204	2.01319	0.402136	0.677024	0.158868	-1.24656	0.38354	0.74546	0.905598
PUS7	1.7232	1.53039e-05	0.000537046	-1.4632	0.26	-1.91347	-1.5829	-2.11099	-1.49146	-0.280237	-1.40013	-0.0923003	0.446551	-0.478459	-0.756813	-0.832958	0.47003	0.834777	0.313926	1.55458	0.573297	0.650773	0.213792	-0.835525	0.978198	1.03992	0.0802061
PVRL3	1.46844	0.0227706	0.117738	-0.884797	0.583642	-1.795	-1.2798	-1.19963	-0.706364	-0.331711	0.00372737	-2.31781	-1.26299	1.81164	2.66683	1.55458	-2.0818	1.97622	1.9445	-0.181927	-0.177389	-0.00616874	0.716023	1.39329	1.67565	1.3323	0.295339
PVRL4	0.628224	0.0149784	0.0877384	-0.38205	0.246174	-0.313027	-0.341408	0.00409311	-0.00046417	-0.683078	-0.958414	0.108075	0.940747	-0.0251593	0.777668	0.324798	0.929325	0.777232	-0.472369	-0.436565	0.0200922	-0.361678	-0.632828	0.845514	0.878516	-0.0931109	0.358525
PXDN	1.50886	0.00283951	0.0270883	-1.08346	0.425403	-1.71483	-1.78934	-1.28418	-1.44915	0.212357	-0.475587	1.06766	1.94007	-0.269533	-1.38965	-0.457519	0.997329	-0.942598	0.951683	1.17879	-0.797939	-0.664151	0.418581	0.432075	2.11782	0.891516	1.3323
PYCR1	0.658777	0.00100819	0.0127093	-0.401473	0.257304	-0.176183	-0.289914	-0.515956	-0.505362	-0.559742	-0.361678	0.654121	0.806178	0.402901	0.190364	-0.00729158	0.882301	-0.122845	-0.410577	0.248281	0.987024	0.156533	-0.312442	-0.0359024	0.187896	0.5249	-0.0345675
PYCRL	1.33858	0.000168774	0.00336665	-0.887086	0.451497	-1.36213	-0.993781	-0.519496	-0.906037	-0.731536	-0.809533	0.706222	0.415106	-0.329823	1.08055	1.44225	-0.273152	-0.666665	0.125194	0.592231	1.22113	1.89787	0.94975	0.0437418	-0.446521	0.563517	-0.0974572
QPRT	1.38042	0.00447353	0.0376441	-0.831138	0.549281	-1.33509	-1.00756	-0.824868	-1.666	-0.0226472	-0.130653	1.15795	1.68927	1.44225	-0.874235	-0.995811	-0.0955151	0.170574	-0.382744	1.89787	0.215552	0.386831	1.84152	1.2631	-0.902418	0.0511072	1.92321
RAB10	0.897397	0.000273065	0.0048432	-0.742389	0.155008	-0.77618	-1.12068	-1.1789	-1.19398	0.0140456	-0.198635	0.952111	0.023789	-0.326217	0.460517	-0.459058	-0.0853065	0.169472	0.329786	0.822697	0.448901	0.421242	0.274877	-0.532907	0.0235453	0.131929	-0.175249
RAB11FIP4	0.81034	0.0154118	0.0894301	-0.409853	0.400487	-0.538077	-0.534637	-0.477945	-0.407429	-0.347604	-0.153425	-0.335946	0.621629	-0.0965155	0.511444	-0.122812	-0.71121	0.340991	0.114473	0.718718	1.36121	0.035609	0.728468	2.11014	1.62	-0.563031	0.0746208
RAB17	0.629077	0.0372352	0.164531	-0.494615	0.134462	-1.05052	-1.48673	-0.488581	-0.458301	0.178382	0.338059	0.238531	-0.221485	-0.402621	-0.786335	0.148413	-0.332738	-0.305304	0.137416	0.621135	0.510072	1.74	0.279198	0.162412	-0.186366	-0.240286	0.789355
RAB25	1.34403	0.0271759	0.132803	-1.47009	-0.126062	-2.48397	-2.26904	-0.947113	-1.47149	-1.70436	0.0554425	0.227518	0.607572	-0.142894	0.207155	0.140565	1.65348	-3.24586	-1.20088	0.756727	0.268995	1.36361	-1.5829	-2.52543	-0.169875	0.77184	0.853381
RAB39B	0.920421	0.00991884	0.0659527	-0.397639	0.522782	-0.459058	-0.518682	-0.285928	-0.416146	-0.0979486	-0.608072	0.333718	2.57115	0.279446	-0.314029	0.837588	-0.014261	0.0450302	1.07573	0.923671	0.345155	-0.0771474	2.13079	0.0702522	0.399445	-0.370269	0.12824
RABGEF1	0.909465	0.00160185	0.0177742	-0.651146	0.25832	-0.628928	-0.884572	-0.257065	-0.385085	-0.723705	-1.02752	-0.46179	0.10079	0.176787	1.03749	0.0610547	0.550143	0.0979998	-0.20956	0.288927	-0.876327	1.23965	1.3669	0.715303	0.465314	-0.327832	-0.0917411
RACGAP1	2.02039	1.17131e-06	7.08982e-05	-1.62327	0.397118	-1.22119	-1.84143	-1.34885	-2.49911	-1.33509	-1.49395	-0.204474	0.38893	1.03884	-0.501012	0.132983	-1.06915	0.669548	0.867255	0.973183	1.81164	0.490356	0.411543	-0.183437	1.19529	0.69485	-0.362457
RAD21	0.986645	2.79263e-05	0.000840961	-0.843267	0.143378	-0.828192	-1.27708	-1.39806	-1.00148	-0.0413428	-0.513448	-0.377904	-0.0519114	-0.492255	0.419819	0.168425	0.819174	0.752011	0.105798	0.233878	0.312278	0.270886	-0.164613	0.178801	0.343865	-0.300936	0.0767266
RAD51	0.790568	0.000223124	0.00415384	-0.551352	0.239216	-0.27001	-0.43128	-0.317747	-0.213656	-1.02684	-1.04858	0.222865	-0.328477	0.494847	-0.138636	1.20984	-0.128088	0.21995	0.000821099	0.136222	0.449172	0.354971	-0.200486	0.128775	0.495488	0.716348	0.19384
RAD51AP1	2.90231	7.85988e-08	8.40346e-06	-2.70647	0.195835	-1.36828	-3.54383	-2.6473	-3.24586	-2.52543	-2.90813	-1.19474	-0.0734352	1.17557	-1.23884	-0.348206	-1.13746	0.0790367	0.615878	0.393056	0.396547	0.163632	0.254477	1.00005	1.30142	1.46558	0.28079
RAD54B	1.68943	8.13663e-05	0.00193319	-1.328	0.361437	-1.30992	-1.62466	-1.13467	-1.18744	-0.675674	-2.03562	-1.65623	-0.524781	0.0337175	-0.253653	-0.120572	1.24263	0.393774	0.742053	0.995924	1.24263	0.135576	0.548574	-0.463037	1.19959	0.524296	1.74249
RAD54L	0.996375	0.00012234	0.0026457	-0.84839	0.147985	-0.77219	-0.755835	-0.0947454	-0.37818	-1.60738	-1.482	-0.0230128	0.00227672	1.12384	-0.236899	0.149737	-0.177723	0.346016	-0.0107828	0.282804	0.013181	-0.0132302	-0.732375	0.143694	0.365132	0.659081	0.476023
RALA	1.31717	0.0012539	0.0148727	-1.06216	0.255011	-1.43363	-1.59718	-1.21964	-1.52136	-0.35623	-0.244918	-1.01508	1.47718	0.422461	0.420792	0.0424469	-0.57155	1.74802	0.144538	0.966199	0.987533	0.541474	0.305313	0.630518	-0.876327	-0.0168887	-1.12645
RALY	1.02463	0.00100683	0.0127093	-0.745084	0.279551	-0.434711	-1.00437	-1.26979	-0.983555	-0.572868	-0.205206	0.0823796	-0.261917	0.274182	-0.0309266	-0.862501	-0.0251593	1.24133	0.473574	0.511321	1.74	0.412772	0.573297	-0.533602	0.685736	0.480071	-0.287745
RAP1GAP	0.592724	0.000643866	0.00924195	-0.350223	0.242502	-0.374926	-0.309471	-0.183478	-0.254217	-0.488932	-0.490311	-0.37926	0.789355	0.533858	0.610052	-0.149551	-0.153668	0.57426	-0.115821	0.177915	0.280727	0.42616	0.638512	0.499157	0.240217	-0.0698035	-0.0220854
RASGEF1A	1.12487	0.00124572	0.0148096	-0.818641	0.306231	-1.08896	-1.16106	-0.569446	-0.965068	-0.748061	-0.37926	0.800269	1.18726	-0.183392	-0.0745426	1.39114	-1.22516	0.475461	0.0575081	0.389744	0.774618	0.705253	-0.0929644	1.18158	0.559937	0.0995552	-1.14658
RASSF10	2.78704	0.000996748	0.0126293	-1.88144	0.905604	-2.26904	-1.795	-1.35294	-2.01606	-2.15552	-1.70007	2.25025	1.16316	-1.0549	-2.48397	-1.89442	1.7179	3.35883	2.88563	3.22064	1.86896	2.3608	0.496428	-1.44278	1.54709	-0.87457	1.37059
RB1CC1	1.06174	0.000647775	0.00926916	-0.792622	0.269121	-0.855506	-1.2275	-1.54007	-0.590204	0.239749	-0.782202	-0.361853	-0.384559	-0.280421	1.33713	0.0800923	-0.661122	0.891167	0.820722	0.73118	0.978689	0.160086	0.183547	-0.0946708	0.4996	-0.169509	0.575851
RBBP8	1.06869	0.0175608	0.0975931	-0.625676	0.443016	-1.08623	-1.49395	-0.610307	-0.587984	0.11731	-0.0928968	1.56751	0.148769	0.585597	-1.16106	-0.400212	-0.638663	0.668677	1.21356	2.55646	0.720353	1.80724	-0.615078	0.122815	-0.185828	0.969524	-0.27142
RBCK1	0.701109	0.0155618	0.0898217	-0.479103	0.222006	-0.674802	-0.550115	-0.779098	-0.750864	-0.136749	0.0170113	0.699776	-0.485873	1.42341	0.492533	-0.256527	-0.466493	-0.14995	0.243368	0.747705	0.811644	0.421316	0.476234	0.540669	-1.0649	0.646463	-0.527278
RBM10	0.647518	0.0185701	0.101939	-0.411063	0.236455	-0.984081	-0.707024	-0.549309	-0.538541	-0.148433	0.461009	0.667005	0.365132	0.0106473	0.644785	0.00420901	-0.0396627	0.0663155	0.755685	0.805731	0.825922	0.629226	1.12315	-0.862501	-0.378797	-0.275194	-0.558372
RBM12B	0.658677	0.00290327	0.0275173	-0.558913	0.0997644	-0.775792	-0.831693	-0.932249	-0.790234	0.0808217	-0.104332	-0.587584	-0.669764	-0.188128	-0.145495	-0.184661	0.465959	0.473182	0.538505	0.106269	0.397272	-0.116771	0.335971	0.295506	0.350701	-0.274699	0.799968
RBM38	1.40054	0.000158861	0.00319396	-0.984156	0.41638	-1.18542	-0.976364	-1.05806	-0.836627	-1.55619	-0.292276	0.243565	-0.00264676	0.874475	-0.0731383	1.54413	-0.772646	0.228689	0.566431	1.18816	1.68927	0.510877	1.11004	0.843346	-0.427316	-0.482745	-0.378412
RCAN3	0.917503	0.000189374	0.00363802	-0.808644	0.108858	-0.938431	-1.03963	-0.694454	-0.630737	-0.90202	-0.646596	-0.223814	0.596889	-0.152925	0.746772	-0.676798	0.70591	0.388184	0.177361	0.327812	0.313397	0.354792	0.135092	0.452519	-0.24346	-0.0344801	-1.12551
RCC1	0.5882	0.00170335	0.0186027	-0.45069	0.137511	-0.545354	-0.652615	-0.426851	-0.504397	-0.404239	-0.170683	-0.316814	0.835056	0.335245	-0.0223481	-0.397401	0.341499	0.37181	0.187634	0.595065	0.564827	0.436038	0.0845604	0.0790859	-0.276934	-0.0693945	-0.54776
RCC2	1.50765	3.89955e-07	2.98401e-05	-1.20741	0.300236	-1.21266	-1.44915	-1.52136	-1.4082	-0.922635	-0.730463	-0.0992081	-0.0873948	0.71922	0.010174	-0.38245	-0.22542	0.9954	0.601097	0.669419	0.382063	0.502221	0.332282	0.0933895	0.399818	-0.459875	1.35303
RCN1	0.946214	0.00857145	0.0597494	-0.83495	0.111264	-1.13635	-0.969234	-1.39692	-1.56814	0.0549191	0.00602564	1.34852	0.938509	-0.701627	-0.216968	-1.23534	-0.228583	0.976999	0.25526	0.0579547	0.299457	0.484575	0.329264	-0.762671	-0.756228	0.0935597	0.897537
RCN2	1.86911	1.07908e-06	6.65481e-05	-1.73081	0.1383	-2.45963	-1.57549	-2.86834	-1.71483	-0.633526	-1.13304	-0.143397	0.209596	0.91635	-0.162559	-0.245637	-1.23215	0.545463	0.180598	0.450158	0.455112	0.643634	0.37343	-0.00690246	0.378857	-0.669764	0.520001
RECQL4	0.772083	1.46059e-05	0.000521346	-0.676703	0.0953799	-0.697709	-0.635065	-0.426004	-0.616019	-0.912202	-0.773217	-0.182244	0.175989	0.215632	0.313166	0.0575698	-0.057438	-0.388097	0.159327	0.389663	0.481559	0.543718	0.102618	0.126992	-0.136584	0.388358	-0.664151
REEP4	0.635999	0.00220859	0.0225558	-0.405339	0.23066	-0.173796	-0.87457	-0.479348	-0.660944	-0.104743	-0.138636	-0.163419	-0.0505955	0.773418	-0.077951	-0.642115	-0.185239	1.01559	0.521697	0.362228	0.181573	0.339634	0.455112	0.0811843	0.470767	0.597385	0.0112826
REXO4	0.673242	0.00122038	0.0145961	-0.54304	0.130201	-0.64149	-0.76208	-0.925977	-0.650013	-0.279637	0.000955478	0.155869	-0.183764	0.154933	0.148711	-0.345676	-0.261867	1.31705	0.0340962	0.373109	0.122815	0.425832	0.497538	-0.0159155	0.0096505	-0.0124264	-0.33673
RFC2	0.894892	2.24142e-05	0.000720278	-0.652318	0.242574	-0.688971	-0.469059	-0.749377	-0.756813	-0.444355	-0.805331	-0.367844	0.720865	0.693024	-0.398252	-0.1844	-0.0642247	-0.0984635	0.0207979	0.597615	0.0678216	0.807172	0.465959	0.0939761	0.413811	0.57288	0.54045
RFC3	0.69504	0.000313571	0.00537014	-0.480257	0.214783	-0.440706	-0.525268	-0.312067	-0.54966	-0.486569	-0.567273	-0.0533549	0.0128155	0.225806	0.0554065	1.19621	-0.0326869	0.706469	-0.0336379	0.0425272	-0.473382	0.298481	-0.169733	0.408674	0.609732	0.246555	0.396651
RFC4	1.68892	2.17291e-05	0.000705193	-1.17954	0.509378	-1.37744	-1.23773	-1.48895	-1.57913	-0.497439	-0.896577	-0.860319	0.038889	0.651749	1.02673	0.420367	0.285107	1.50121	1.02986	1.56188	-0.0867851	1.42341	-0.572724	-0.150619	1.49121	0.476567	-0.0864903
RFWD2	0.616849	0.00564942	0.0446644	-0.361202	0.255647	-0.226368	-0.492442	-0.638801	-0.67977	-0.0713916	-0.058441	0.0719306	-0.238508	-0.272007	-0.0947836	-0.161339	0.151659	1.0833	0.277197	0.192382	0.613183	0.113524	0.636967	-0.265278	1.04519	-0.0609233	0.997848
RFWD3	0.791863	0.0103038	0.067589	-0.372341	0.419522	-0.569008	-0.655177	-0.431384	-0.295892	0.0157871	-0.298373	-0.119332	-0.292733	-0.561143	-0.217648	-0.28908	0.486093	0.0917676	0.85078	0.155521	0.242436	0.3048	0.395462	0.947236	1.53408	1.39731	1.7868
RFXANK	1.18172	0.000382172	0.00619931	-0.821973	0.359748	-1.23884	-0.971347	-0.857219	-1.18849	-0.488334	-0.187608	0.377821	0.730481	-0.0933799	-0.242189	0.0128155	-0.700573	-0.491013	0.359516	1.16239	1.29687	0.760439	0.768242	0.493982	0.0685045	-0.409315	1.66138
RGCC	0.817915	0.0109384	0.0705587	-0.651276	0.166638	-0.264832	-0.752574	-0.244794	-0.617151	-0.993253	-1.03506	0.109942	0.406869	-0.572868	-0.621111	1.68927	0.673705	0.880111	0.41932	0.20726	-0.492526	1.19824	-0.13801	-0.31579	-1.08344	0.311559	-0.00631529
RGS1	1.48473	0.0032158	0.0295492	-1.2387	0.246033	-1.07174	-1.91347	-0.0439706	-0.365955	-1.73562	-2.30142	0.970333	0.838211	-0.957933	0.256922	2.61841	0.00102063	1.05622	-0.0440736	0.0823796	0.0581496	1.13814	-0.606262	0.344875	-1.666	0.85371	-1.00756
RHBDF2	0.724807	0.0107917	0.0699642	-0.485992	0.238815	-0.288011	-0.665945	-0.89571	-0.846049	-0.00273919	-0.217499	0.307378	0.67281	-0.871431	1.01559	-0.240756	0.605411	0.0528817	0.0793747	0.544826	0.571562	0.938979	0.462913	-0.0615767	-0.514673	1.11807	-0.860319
RHNO1	1.08547	0.000421142	0.00661761	-0.724682	0.36079	-0.816915	-0.559584	-0.731536	-1.20088	-0.658073	-0.381099	0.756287	0.657051	1.39114	-0.295727	-0.310823	-0.637597	-0.447144	-0.0910184	0.139038	0.226599	0.179782	0.546808	1.52875	0.417926	1.18158	0.529998
RHPN1-AS1	0.731494	0.00127383	0.0150002	-0.535373	0.196121	-0.142101	-0.320621	-0.247114	-0.366567	-1.00437	-1.13147	0.3115	0.514278	0.600291	0.310374	0.668246	0.0683411	0.0476213	-0.248088	-0.00991924	-0.116107	0.55415	0.119275	1.13814	-0.195024	-0.630211	0.00506545
RIOK1	1.01552	0.00505204	0.0408592	-0.655244	0.360274	-1.4149	-0.813344	-0.650242	-0.594523	0.031437	-0.489896	-0.717388	-1.1458	1.14556	1.42575	1.17966	-0.905274	1.15302	0.513274	0.985466	0.250356	0.797236	-0.00347815	0.438095	0.727275	-0.0297729	-0.0495955
RIPK4	0.607971	0.00127318	0.0150002	-0.36241	0.245561	-0.779841	-0.506208	-0.429986	-0.425822	-0.0579692	0.0253685	0.242668	-0.341154	-0.415984	0.886179	-0.0370165	0.528562	0.0786888	0.332147	0.374539	0.391177	0.594042	0.782663	0.376183	0.0239107	-0.0637718	0.176141
RITA1	0.65309	0.00544519	0.0434552	-0.388354	0.264737	-0.56605	-0.466359	-0.359532	-0.6456	-0.358537	0.0659565	0.18105	0.819489	0.759342	-0.227996	0.0510029	-0.638471	-0.469514	0.243629	1.27632	0.594771	0.343865	0.371584	-0.202398	0.0152358	0.792183	0.32569
RMI1	1.30679	2.59141e-06	0.000134448	-1.07787	0.228922	-0.915775	-1.37915	-1.29602	-1.59718	-0.404854	-0.874235	0.141471	0.257503	-0.322671	-0.817915	-0.259829	0.729483	-0.0345341	0.653137	0.609732	0.812883	0.494295	0.422329	0.664763	0.0620873	0.467272	-0.217251
RMI2	1.30928	1.31461e-05	0.00047623	-1.10658	0.202703	-1.12723	-0.494259	-0.521844	-1.35116	-1.84143	-1.30353	0.657432	0.391051	0.276902	-1.08519	0.506531	-0.299336	0.638166	-0.118777	0.524782	0.0807853	-0.14712	0.527456	0.430703	-0.522326	0.776917	0.605276
RNA45S5	1.78118	0.0130732	0.0799752	-0.690649	1.09053	-0.837804	-0.837199	-0.878361	-0.494425	-0.531466	-0.564639	4.19157	-0.337816	-0.709859	-0.603666	3.35883	-1.29432	-0.365251	1.95586	2.68144	3.38992	0.227351	0.195315	0.781177	2.27155	0.236936	1.46943
RNASEH1-AS1	1.07257	0.00147935	0.0166984	-0.731388	0.341186	-0.660283	-0.997164	-0.602861	-0.714346	-0.504239	-0.909436	0.449732	0.0123157	1.35167	-0.283505	-1.09039	-0.498534	0.0088767	0.27938	0.761965	0.771589	0.467357	1.09561	-0.0152092	1.43021	1.27243	-0.554535
RNASEH2A	1.3989	0.000790304	0.0107249	-1.05052	0.348381	-0.739231	-0.796634	-0.978856	-0.911745	-1.53504	-1.34161	-0.910671	-0.973408	1.45947	0.300752	-0.259418	-0.95443	0.323744	0.325111	2.02615	0.840197	0.654493	0.157513	0.798212	0.922889	1.40204	-0.538541
RND3	0.905445	0.019199	0.104539	-0.700194	0.205251	-1.75771	-0.965068	-0.829909	-0.446323	0.22454	-0.426695	-0.160517	0.757297	0.860826	-0.738146	1.04707	1.08959	0.665943	1.62	0.230365	-0.398536	-1.40532	-1.04923	0.0561263	0.104155	0.713655	-0.109245
RNF114	0.637295	0.0307658	0.14475	-0.420006	0.217288	-0.419072	-0.46198	-0.751161	-0.862829	-0.100658	0.0756613	0.466581	-0.475054	-0.460151	-0.132147	0.18897	-0.1313	0.807172	0.321712	1.82135	0.409182	0.641486	0.961843	-0.794636	-0.0639003	0.463435	-0.547926
RNF139	1.24188	0.000197059	0.0037479	-1.01508	0.226794	-1.26667	-1.14305	-1.90083	-1.21582	-0.328423	-0.235698	-0.458201	1.05893	-0.772646	0.72274	0.488039	-0.612802	1.07127	0.481132	0.0916058	0.270087	0.458338	0.448239	0.80215	-0.236952	0.519712	-0.702926
RNF157-AS1	1.53789	8.48484e-05	0.00199726	-1.34078	0.19711	-1.28764	-1.31823	-0.673941	-1.10567	-2.04298	-1.6162	1.53234	1.15129	-0.106452	-0.0424936	-0.0232819	0.169434	-1.39806	0.492796	0.209596	0.467357	0.632732	0.313864	0.69	-0.0256655	-1.47395	0.564245
RNF182	1.93344	0.0204029	0.109121	-1.1161	0.817336	-0.871431	-1.15569	-2.30142	-1.25099	-0.312586	-0.804518	-1.75285	-0.46212	2.27894	1.09389	2.13708	1.2662	4.14132	0.196699	3.45059	0.855883	2.11014	-1.77196	2.15125	1.41792	-2.24627	-1.78934
RNF43	0.798001	0.00500581	0.0406232	-0.510722	0.287279	-0.601847	-0.98062	-0.525576	-0.252548	-0.664414	-0.0393278	0.715787	0.173938	-0.143714	-0.185336	-0.354162	-0.665042	1.80724	0.231074	0.379143	1.11089	0.0177075	0.317123	0.38614	0.444032	-0.41085	0.77249
RNFT2	0.620817	0.0221188	0.115313	-0.368746	0.252071	-0.220005	-0.225023	-0.169145	-0.289964	-0.764354	-0.543987	-0.332681	-0.131566	1.59734	-0.120791	0.843346	-0.558598	0.389583	0.316527	0.839533	0.413199	-0.32857	-0.366829	-0.0744165	1.30683	0.117503	0.122729
ROMO1	1.12602	0.0187331	0.102687	-0.460214	0.665808	-0.802191	-0.443069	-0.734306	-0.674142	-0.231634	0.124062	0.0053599	0.0482199	1.67293	1.71305	-0.165422	-0.581965	-0.0791696	0.942437	0.982486	3.29814	1.60978	1.71305	-0.45413	-0.0435429	0.811644	-0.819937
RP1-39G22.7	0.91627	0.000780989	0.0106363	-0.678831	0.23744	-0.771115	-0.696204	-0.921113	-0.851616	-0.295496	-0.53744	-0.703398	0.0666563	-0.309127	0.973183	-0.523132	0.0911424	0.560878	0.586791	0.712289	-0.059978	0.216324	0.291628	1.06515	0.233973	-0.551393	1.14804
RP11-1094M14.11	1.35979	0.000103777	0.00233469	-0.926228	0.433559	-1.54721	-0.421406	-0.783634	-1.19963	-0.936014	-0.669474	-0.235473	0.733339	-0.20909	1.04455	-0.17602	-0.34737	1.59999	0.0566597	0.240062	0.472129	0.33126	0.26449	1.87279	1.36522	0.10616	-0.18176
RP11-111M22.3	1.11023	0.00603116	0.0467139	-0.818124	0.292104	-1.89442	-0.508505	-0.72615	-1.14398	-0.670015	0.0343248	-0.549533	0.392503	0.837282	1.49862	-1.26505	-0.837804	0.6323	0.442585	0.242538	1.20067	1.40376	0.880111	1.03297	-0.503701	-0.0232148	-0.710376
RP11-199F11.2	0.767957	0.0408158	0.175028	-0.357843	0.410114	-0.151622	-0.455131	0.222917	-0.533156	-0.228583	-1.00148	-0.674563	-0.119809	0.834051	2.69153	-0.166942	1.11369	0.940364	0.476234	0.0444529	-0.352539	0.348843	0.119629	-0.673941	0.886179	-0.217453	1.3121
RP11-1L12.3	1.39359	0.00262954	0.0256781	-0.956672	0.436916	-0.661509	-0.855958	-0.593954	-0.94526	-1.5829	-1.10046	-0.899344	2.28916	0.0736526	-0.140979	1.96559	-1.17061	1.06839	0.00759542	0.888663	1.17755	0.59584	1.39902	-0.0609776	0.288452	-1.23884	0.747482
RP11-255C15.4	0.606725	0.0117717	0.0742792	-0.366827	0.239898	-0.81198	-0.257604	-0.254503	-0.416059	-0.460629	-0.000188317	-0.219455	0.0104321	-0.346331	0.415498	1.16764	0.168425	0.243824	0.995924	-0.0363365	0.749378	0.87257	0.0576045	-0.350425	0.603642	0.224236	-0.718252
RP11-29H23.4	0.834322	0.0182836	0.100562	-0.4655	0.368822	-0.611333	-0.40952	0.137988	-0.298373	-1.19003	-0.421727	-0.870485	-0.900805	1.7179	0.726259	-0.0756746	-0.208297	1.12846	0.156211	-0.372069	0.0789631	0.360395	0.401068	1.3576	1.34614	-0.0401279	1.09561
RP11-379H18.1	0.843437	0.0253039	0.126464	-0.407051	0.436386	-0.405226	-0.520065	-0.853403	-0.692359	0.116249	-0.0875026	-0.162016	1.31302	0.618093	1.6374	-0.49413	1.08814	2.15829	0.39159	0.945099	0.482259	-0.389816	0.910323	0.345155	-0.521672	-0.773494	-0.56605
RP11-384L8.1	0.722721	0.0152502	0.0887846	-0.436713	0.286008	-0.735878	-0.372399	-0.206431	-0.105751	-0.41068	-0.789141	-0.231749	1.81404	0.0332162	-0.231387	1.49862	0.716348	0.230239	-0.652412	0.230843	0.840575	0.415213	0.366831	0.262335	-0.116234	0.0489889	-0.649351
RP11-48B3.4	1.47932	0.0233443	0.119731	-0.908037	0.571283	-1.06211	-1.31169	-0.890959	-1.33509	-0.0772543	-0.771115	-0.0204097	-1.68291	2.06835	1.75079	3.19964	-2.02619	1.14092	1.40053	1.36884	1.73759	0.0526687	0.163835	-0.0247126	2.17377	-1.78934	-0.372837
RP11-532F12.5	1.07349	0.00136253	0.0157051	-0.872181	0.201313	-1.0455	-1.00637	-0.461338	-0.921113	-1.3578	-0.440973	0.819174	1.45947	-0.705589	-0.11569	0.0540599	1.02427	-0.917132	0.242383	0.85371	0.169808	1.16176	0.14786	-0.787034	-0.539517	0.167186	0.186297
RP11-554J4.1	0.831089	0.00323495	0.0296537	-0.55996	0.271129	-0.585354	-0.187608	-0.532786	-0.54872	-0.412849	-1.09244	-0.20012	-0.248612	0.426836	1.91885	0.547922	-0.246291	-0.070124	0.0779943	0.0770035	0.566947	0.254283	0.409085	1.21826	-0.63326	0.137081	0.102204
RP11-672L10.6	0.926317	0.0241292	0.122357	-0.62191	0.304407	-0.735023	-0.762454	-1.03198	-0.941869	-0.587743	0.327608	-1.29183	-0.884572	0.160455	1.12535	0.213792	0.727046	1.28381	-0.272696	-0.0776442	0.189226	-0.322355	1.21634	2.58181	0.412925	-0.350783	0.159635
RP4-798A10.7	0.817519	0.0035409	0.0314746	-0.445341	0.372178	-0.226499	-0.347173	-0.304336	-0.393719	-0.676798	-0.72352	-0.205874	0.764112	1.07026	0.564593	0.20542	0.868118	1.19159	0.166882	-0.442692	-0.261648	1.14682	0.36608	-0.0493965	-0.00496879	-0.662977	1.23853
RP5-935K16.1	0.689213	0.00348241	0.0311606	-0.733041	-0.0438273	-1.39169	-0.718516	-0.830598	-1.00057	-0.467087	0.0102165	0.151441	0.0259355	-0.53393	-0.857219	-0.106552	0.0102559	0.0486046	0.574112	0.379864	0.383066	0.33421	0.0869656	-0.171592	0.0290109	0.0575698	-1.11298
RPAP3	0.810843	0.00239556	0.023841	-0.647414	0.16343	-0.69602	-0.947113	-0.638214	-0.64817	-0.167931	-0.787034	-0.470846	0.207023	0.7381	-0.339704	0.107458	-1.18306	0.232282	0.0861344	0.92397	1.12315	0.077801	0.329547	-0.000101805	0.454481	-0.354545	0.683188
RPIA	0.888421	0.000121934	0.00263941	-0.771315	0.117107	-1.04115	-0.972764	-1.16106	-1.13211	-0.223712	-0.0971003	0.152941	-0.178035	0.275138	-0.315237	-0.405328	0.201647	0.32826	0.296407	0.478599	0.491414	0.194507	0.0744424	0.693244	0.56783	-0.344676	-0.637447
RPL30	0.688477	0.00218397	0.0223589	-0.684523	0.00395435	-0.894693	-0.686762	-1.45498	-1.24926	0.0121588	0.166396	-0.183198	-0.478326	-0.404633	0.333215	-0.256759	0.0838122	0.625726	0.161985	0.0990854	0.180659	0.174035	0.0358278	0.324859	0.105937	-0.481404	-0.257553
RPL37	0.617346	0.000760397	0.0104584	-0.563021	0.0543246	-0.889999	-0.656507	-1.00437	-0.998304	0.0356999	0.135352	-0.0419724	0.225883	-0.244127	0.421058	-0.141019	-0.114605	0.460873	0.159277	0.108227	-0.00460737	0.133314	-0.0589842	0.313994	0.129303	-0.479843	0.00242159
RPL39L	1.72558	1.05162e-06	6.55617e-05	-1.30789	0.417687	-1.53504	-1.15888	-1.77525	-1.51342	-0.868228	-0.996554	-0.352539	1.03183	-0.654019	-0.0248287	0.449732	-0.162896	1.11906	-0.0735535	1.19959	-0.0241816	1.48216	0.238175	0.909322	0.918078	0.488764	0.138297
RPL7L1	0.756924	0.00739983	0.0539542	-0.695645	0.061279	-1.14305	-0.882903	-1.24926	-1.18015	0.113181	0.168312	-0.121684	-0.26073	1.02494	-0.538396	-0.994315	-0.681248	0.61347	0.437739	0.278742	0.351704	0.620789	0.22822	-0.255037	0.179984	-0.0626251	0.15891
RPL8	1.02195	8.41407e-05	0.00198673	-1.05189	-0.0299469	-1.1538	-1.0549	-1.98875	-1.68291	-0.422645	-0.00836508	0.0519581	-0.279155	-0.333594	0.361651	-0.291723	0.146147	0.213264	0.019798	0.0501752	0.209936	0.236787	0.0847179	0.283503	0.0822266	-0.655397	-0.659446
RPLP0	0.599938	0.0027772	0.0266425	-0.627311	-0.0273722	-1.05116	-0.678961	-1.20387	-1.06915	0.0934829	0.145802	-0.0256426	-0.262495	0.322481	4.88186e-05	0.04515	-0.688504	0.299756	0.0679021	0.231279	0.169326	0.111357	-0.165575	-0.259113	0.204494	-0.233199	-0.25522
RPN1	0.621685	0.0442318	0.184262	-0.283455	0.338229	-0.279712	-0.430689	-0.63623	-0.738146	0.023083	0.360962	1.21634	-0.668861	-0.369173	1.23965	-0.648414	0.510072	0.679134	0.431825	1.33713	0.00786788	0.378978	0.785735	-0.246946	-0.372164	-0.0924042	1.2229
RPN2	0.68799	0.0346133	0.156982	-0.707224	-0.0192348	-1.11298	-1.14112	-1.36654	-1.02614	0.0856184	0.317812	-0.802977	-0.901623	0.517735	-1.1723	-0.48901	-0.997759	0.401716	0.444032	0.607753	0.609439	0.463977	0.904858	-0.0520428	0.015463	0.16267	-0.0196918
RPP21	0.77767	0.0014721	0.0166494	-0.503966	0.273704	-1.04291	-0.711449	-0.665657	-0.630038	-0.177062	0.203316	-0.0676558	-0.152394	0.608784	0.701905	-0.295021	0.0500413	-0.0135628	0.567967	1.0126	0.326779	1.0011	0.392819	-0.220432	0.297215	0.71922	-0.550115
RPP40	1.32257	0.000414572	0.00655069	-1.1746	0.147968	-1.24281	-0.912682	-1.17499	-1.37205	-0.982938	-1.36213	-0.210419	-1.68744	0.435836	0.759905	-0.0756153	-1.02491	1.09777	0.051333	1.38847	0.129303	1.0689	0.134189	0.0463267	0.417387	-0.751481	0.587931
RPS18	0.701039	0.00130753	0.0152868	-0.701598	-0.000559627	-1.16528	-0.791893	-1.15888	-1.2683	0.0461395	0.128625	0.12016	-0.0282423	0.224868	0.100393	-0.705787	-0.288583	0.570076	0.110021	0.0519581	0.138784	0.272144	-0.0926373	0.225194	-0.0527147	-0.301325	-0.353263
RPUSD2	0.634588	0.000121931	0.00263941	-0.554328	0.0802607	-0.690938	-0.617957	-0.482609	-0.589318	-0.823621	-0.121524	0.357201	-0.483469	0.243299	0.255093	-0.0512112	0.0554702	0.109066	0.130498	0.306102	0.169929	0.427951	-0.531991	-0.130039	0.0866642	-0.163172	0.502781
RRM2	2.29349	7.3177e-07	4.95352e-05	-1.93648	0.357003	-0.814686	-2.54815	-1.22984	-2.9562	-1.58606	-2.48397	0.234765	0.81778	0.817162	-0.471621	-0.39747	0.0298145	-0.35518	-0.0232148	0.829455	1.18065	0.80215	0.594362	-0.631312	1.30816	1.51884	-0.542282
RRP36	0.636689	0.0196385	0.106249	-0.457485	0.179205	-0.547163	-0.3326	-0.666472	-0.631645	-0.209468	-0.357561	-0.615243	-0.0677739	2.00911	0.162341	-0.486478	-0.537149	0.814962	-0.317047	0.329185	0.0784889	0.241875	-0.0640725	0.139038	0.541881	0.164314	0.473839
RRP9	0.724288	0.000910444	0.0118871	-0.48852	0.235768	-0.309204	-0.580007	-0.723891	-0.538763	-0.508986	-0.270268	1.00879	-0.290774	0.0184382	0.130014	-0.105232	-0.235208	0.300596	0.178863	0.623018	0.727946	0.703788	0.674029	-0.307724	0.491029	0.447504	-0.592788
RTKN	0.800825	0.000294977	0.00513238	-0.60272	0.198105	-0.731168	-0.852012	-0.533156	-0.708328	-0.595323	-0.196331	0.373899	-0.261867	-0.304567	-0.250389	0.454889	0.421316	-0.410263	0.272921	0.178641	1.12636	0.760136	0.348692	0.0742264	0.484575	0.377244	-0.476131
RTKN2	0.683546	0.00702125	0.0520565	-0.341475	0.342071	-0.289835	-0.466741	-0.218177	-0.22632	-0.206287	-0.64149	-0.463152	0.433356	1.35438	0.0659565	-0.0806087	0.334016	0.413281	0.585272	0.0626677	0.161229	0.104075	-0.187129	0.294089	1.38847	1.30142	-0.2942
RUNX3	0.662749	0.024061	0.122107	-0.325642	0.337107	-0.0680357	-0.437111	-0.00719861	-0.322825	-0.288382	-0.830298	0.00979949	1.74249	0.44814	1.31705	0.0325916	1.132	0.564369	0.0584648	-0.290993	0.404557	0.0297491	0.0443779	-0.41361	-0.113782	1.0777	-0.649192
RUSC1	0.630298	0.00118312	0.0142924	-0.549588	0.0807105	-0.000708692	-0.842987	-0.538763	-0.373636	-0.974547	-0.566885	-0.710652	0.00381083	0.034657	0.564957	-0.462585	0.658906	0.239893	-0.193791	0.00800906	0.169281	0.0312828	0.157239	-0.136667	0.466457	0.4996	-0.0390302
RUVBL1	1.36976	5.30682e-06	0.000242355	-1.14569	0.22407	-1.4082	-1.0302	-1.08164	-1.28764	-0.916722	-1.14977	0.161588	-0.601847	0.461009	0.505587	0.292548	-0.835251	0.489052	-0.259177	0.762538	0.262267	0.96423	0.611118	-0.689908	1.02568	-0.107214	0.5429
RUVBL2	0.623949	0.000657732	0.00937627	-0.397197	0.226752	-0.625081	-0.307196	-0.404957	-0.572075	-0.297999	-0.175872	0.0272697	-0.428951	0.157055	0.906495	-0.0844148	0.0271637	0.322783	0.434458	0.28113	0.608627	0.771589	0.604779	-0.162798	0.219333	0.159435	-0.215918
RYR1	0.998861	0.011103	0.0712836	-0.443541	0.55532	-0.421727	-0.320785	-0.399806	-0.361853	-0.276322	-0.880756	-0.254155	0.450491	0.117442	2.78277	-0.0702529	0.00403423	1.00935	1.95088	-0.449898	0.19874	1.24944	1.09623	-0.579678	0.354215	1.05173	-0.02621
S100A1	0.619815	0.0231946	0.119208	-0.294924	0.324891	0.0584648	-0.377993	-0.085227	-0.08728	-0.626228	-0.65128	0.0887967	0.758057	-0.468975	0.976999	-0.042458	0.46682	0.314521	-0.216635	-0.254276	-0.106552	0.338435	1.10326	1.4343	0.441006	-0.702701	1.06766
S100A13	0.837986	3.20962e-06	0.000157927	-0.786279	0.0517074	-0.956428	-0.803788	-0.626934	-0.931554	-0.943754	-0.455217	0.184027	0.291059	-0.603528	0.173165	-0.0505955	-0.0473297	-0.132415	-0.491121	0.00669796	0.09414	0.212559	0.574547	0.0107019	0.44849	-0.0812994	0.238221
S100A14	1.42686	0.00208291	0.0216525	-1.09751	0.329352	-1.00382	-1.56419	-1.17061	-1.17061	-1.666	-0.00983843	-0.69197	0.0330514	-0.794931	1.66773	0.576512	1.30988	-2.0607	-0.21231	0.519712	1.25245	0.696976	1.3576	1.01621	-0.609465	0.534039	0.67483
S100A16	0.652027	0.0422094	0.179009	-0.36228	0.289747	-0.572517	-0.445451	-0.699249	-0.518682	-0.0284822	0.0907016	1.18308	1.10326	-0.826047	1.21162	-0.693592	0.915161	-0.758618	-0.513448	-0.0934683	0.357201	0.301486	1.00171	0.595351	-0.456632	0.907819	0.401068
S100A2	2.05207	0.00154925	0.0172996	-1.57029	0.481777	-2.1837	-1.97364	0.472493	-2.15552	-1.84577	-1.73562	0.847666	2.86636	0.774345	1.52251	-0.407845	3.35883	-0.469725	-0.0552861	-2.0818	0.0603675	-0.221357	0.956329	0.101947	0.302002	1.03602	-0.881942
SAC3D1	1.49525	0.000137756	0.00287218	-1.21206	0.283188	-1.35569	-1.39692	-1.18542	-1.75771	-0.786677	-0.789968	0.287126	0.755176	0.82045	0.610644	-1.06915	-0.166684	1.11619	0.0554065	1.02494	1.03884	1.00996	0.441205	-0.667575	-1.01709	1.13729	-0.84572
SACS	0.662988	0.0479695	0.193858	-0.413263	0.249725	-0.367381	-0.859732	-0.823621	-0.521252	0.526356	-0.433947	-0.178206	-0.142949	-0.716549	0.966199	1.07193	-1.30992	1.54045	0.856985	-0.0445958	0.385298	0.189816	0.0255748	0.134512	0.899808	0.845514	-0.528267
SAPCD2	0.88913	1.32249e-05	0.000478018	-0.807676	0.0814539	-0.805955	-0.532488	-0.792191	-0.687064	-1.19284	-0.835525	-0.0218145	-0.15525	0.191512	0.161094	-0.564985	-0.287818	0.954738	0.11043	0.252333	0.30648	0.169756	0.0781463	-0.0231314	0.0777621	0.553862	-0.499852
SARS2	0.667867	0.00158098	0.0176009	-0.499755	0.168111	-0.386236	-0.384311	-0.430689	-0.509227	-0.827917	-0.460151	-0.764013	-0.392859	0.918078	0.331983	-0.0997566	-0.397936	0.518139	0.418347	0.23594	0.754142	0.214148	-0.0666396	0.0614636	0.686163	0.129392	0.143192
SASS6	1.15189	0.00021622	0.00404838	-0.928546	0.223346	-0.644394	-1.90582	-0.6864	-0.758206	-0.489759	-1.0867	-0.432927	-0.103978	0.925257	0.0259068	0.851127	-1.25337	0.988095	0.952111	0.479046	0.39263	-0.257553	-0.138373	0.302366	0.339778	0.277001	0.226412
SBK1	0.874219	0.00940393	0.0636762	-0.604939	0.26928	-0.477846	-0.720942	-0.373457	-0.659073	-0.88236	-0.515956	0.51533	0.206162	1.54709	-0.00760272	-0.110033	-0.960019	1.21715	0.331038	0.0761282	0.296179	-0.869104	0.550143	0.82045	1.21082	-1.13147	0.616202
SCAND1	0.5942	0.0453107	0.187367	-0.467516	0.126684	-0.857735	-0.615243	-0.771783	-0.642506	-0.0932495	0.175422	0.365919	-0.200629	0.229568	1.18816	0.133403	-1.06779	-0.766928	0.282332	0.39183	0.716348	0.415106	1.34852	-0.530393	-0.230131	0.367244	-0.615622
SCARA3	1.04771	0.0409936	0.175643	-0.81026	0.237446	-1.46899	-1.43363	-0.692359	-1.16712	0.125789	-0.225246	0.399896	1.14682	-1.42446	0.00669796	0.0607895	1.7532	-0.445901	0.206661	0.0702105	-0.936014	3.09569	0.483955	0.259531	-0.168149	-1.74785	1.03805
SCARNA15	0.90194	0.00927417	0.0630401	-0.708133	0.193807	-0.794636	-0.769915	-1.36951	-1.24164	0.337485	-0.410577	-0.088342	0.0192367	-0.317284	0.97574	-0.699249	1.49471	0.826853	0.834552	0.302366	0.312493	1.0827	-0.0397266	-1.02836	-0.89571	0.124527	0.196407
SCD	0.648792	0.00629148	0.0481757	-0.520531	0.128261	-0.0662689	-0.490805	-0.316272	-0.57696	-0.872832	-0.800049	0.877206	0.0101029	-0.219111	1.2673	0.260394	0.275993	0.172269	-0.221528	0.350375	0.725835	-0.0093401	-0.262641	-0.396879	0.0104079	0.0104633	-0.798678
SCGB1D2	1.58583	0.0169916	0.0953564	-0.790952	0.79488	0.0210767	-0.910671	-0.0639003	-0.339502	-1.80686	-1.64586	0.967827	0.506531	-0.185006	-0.60969	2.49842	0.000955478	-0.369921	1.30816	3.95468	0.678289	0.703054	1.04058	-0.440973	0.282475	-1.45232	3.83501
SCGB2A1	3.92084	0.000133452	0.00280281	-2.42223	1.49861	-3.1631	-2.83635	-0.690403	-2.73095	-3.31756	-1.795	2.09387	3.00614	-0.759784	1.97143	3.77456	-0.192276	-0.566271	1.87279	3.52174	3.52174	0.0590665	3.88712	0.38247	-0.893625	-2.31781	4.61668
SCRIB	1.69828	9.03904e-08	9.44353e-06	-1.39081	0.30747	-2.19663	-1.52674	-1.09039	-1.54721	-1.10717	-0.876732	-0.312586	0.0579547	0.322783	0.61088	0.810126	-0.352539	-0.321695	0.607185	0.598217	0.949243	0.966741	0.581348	0.564957	-0.116967	0.352653	-0.398775
SDC1	1.21548	0.00596326	0.0463764	-0.535265	0.680218	-0.22931	-0.585208	-0.0935849	-0.418817	-0.837804	-1.04687	-0.703878	-0.301608	1.09166	0.408535	0.248655	2.86636	1.40481	0.301257	1.39902	-0.195157	-0.416059	0.338981	-0.321972	1.64872	1.90335	1.21082
SDE2	0.669895	0.00102622	0.0128657	-0.462627	0.207268	-0.550886	-0.641725	-0.651105	-0.516519	-0.119508	-0.296021	-0.0434337	0.769609	-0.0128885	0.36689	0.174335	-0.735502	0.0429648	0.123616	1.11369	0.205909	-0.0665651	-0.0315575	0.253435	0.345522	0.0688711	0.741387
SDHA	0.744517	0.0020798	0.0216397	-0.616853	0.127663	-0.710376	-0.857219	-0.876732	-1.1723	0.0375716	-0.122067	-0.303214	0.132269	-0.731536	0.233348	-0.562684	0.0091209	0.721504	0.319939	0.537924	0.272598	0.859768	0.366653	0.528701	-0.250327	-0.379838	0.28839
SDHAP1	0.696642	0.00492453	0.0402117	-0.57281	0.123831	-0.751161	-0.960019	-0.850008	-1.00909	0.00542095	0.127998	-0.327605	0.360395	-0.691204	0.874851	-0.540808	0.104383	0.572369	0.268287	0.498791	0.192162	0.705658	0.272079	0.577145	-0.447296	-0.291275	-0.146634
SEC24C	0.927244	0.000172983	0.00341574	-0.832957	0.0942869	-0.513854	-1.17061	-1.43003	-0.857735	-0.547456	-0.478063	-0.184859	-0.421846	0.0402453	-0.0289353	-0.938874	1.25808	-0.139573	0.0394769	0.409464	-0.0220146	0.357201	0.331568	0.0767623	0.403356	0.0589688	0.269565
SEH1L	0.714013	0.0314105	0.146698	-0.623274	0.0907387	-0.560252	-0.834859	-1.05595	-0.779539	-0.0741449	-0.434901	-0.314792	-1.06915	0.865581	-0.373101	-1.68291	-0.496048	1.57388	-0.108513	0.357719	0.314766	0.521697	0.38354	0.456059	0.442905	0.282585	0.297601
SEMA5B	0.681944	0.0190509	0.104046	-0.33054	0.351404	-0.0997256	-0.215575	-0.216635	-0.419072	-0.529381	-0.502851	0.311157	0.111558	0.482586	0.272803	-0.0183752	1.03992	-0.00588793	-0.134567	-0.306039	-0.358125	-0.0138944	2.20923	0.0926027	0.546309	0.018591	1.37459
SEPHS1	0.807946	0.01231	0.0766192	-0.580748	0.227198	-0.91629	-0.518519	-0.784456	-0.907991	-0.214338	-0.142894	0.183171	-1.50826	-0.0811644	-0.723023	-0.11929	-0.563031	0.797236	0.650773	0.61208	0.865897	0.041221	0.53637	0.699151	1.09561	-0.0450543	1.19348
SEPHS2	0.827185	0.00852503	0.0596172	-0.548992	0.278193	-0.353579	-0.981957	-1.15664	-0.996554	0.181639	0.0131423	-0.47888	-0.192945	-0.284395	0.997329	-0.314792	0.00338213	1.42775	0.269075	0.993003	0.153232	-0.371381	0.456191	0.296769	-0.443069	0.48636	1.45346
SERBP1	0.734337	0.000390993	0.00626904	-0.597531	0.136806	-0.842987	-0.859375	-0.933921	-0.949911	0.000416359	0.00059085	-0.0518311	0.197439	0.00276286	-0.358125	-0.323415	0.0149068	0.439828	0.446294	0.223627	0.104222	0.367183	-0.197464	0.339433	0.384753	-0.296155	0.89544
SERF1A	0.703737	0.00914426	0.0624166	-0.485562	0.218174	-0.604592	-0.856718	-0.697411	-0.561429	-0.122176	-0.0710479	-0.544122	-0.324465	0.386995	0.890593	-0.230956	-1.20387	0.622405	0.606268	-0.0638282	0.569975	0.577145	0.847666	0.690824	0.766751	0.000286018	-0.100875
SFMBT1	0.856201	0.000833131	0.0111257	-0.651097	0.205104	-0.339785	-0.631433	-0.370178	-0.62339	-0.946646	-0.99515	-0.401047	0.770737	0.207684	0.910816	0.0340346	0.217559	0.571895	-0.735502	0.389992	0.682025	0.0534508	0.672614	0.499269	0.48287	-0.906037	-0.1687
SFN	1.38888	0.00102101	0.012817	-0.948375	0.440504	-0.601124	-1.21705	-0.555286	-1.00574	-1.28764	-1.02342	0.62711	1.30223	-0.407744	1.38129	-0.487453	1.88995	0.96423	0.538122	0.114225	0.842635	0.849462	0.594613	-0.282509	-0.714651	1.38991	-1.55335
SGPL1	0.655066	0.00541181	0.0432606	-0.393575	0.261491	-0.508265	-0.58468	-0.739885	-0.543987	-0.120275	0.135644	-0.146598	-0.198943	0.381543	0.925816	-0.269954	-0.0766832	0.404366	0.067508	-0.168735	0.407964	0.0902828	1.38129	0.558143	0.586897	-0.465818	0.706781
SHARPIN	0.611979	0.0212435	0.112047	-0.408979	0.203	-0.508505	-0.661509	-0.535557	-0.378703	-0.377993	0.00839327	0.32561	-0.287228	-0.352923	0.308649	0.414004	0.475386	-1.02083	0.00545096	0.236992	0.474371	1.29785	0.936207	0.720067	-0.623229	0.696393	-0.358768
SHCBP1	1.53514	0.000825827	0.0110561	-1.26457	0.270567	-0.397128	-1.62119	-0.509366	-1.74226	-1.51065	-1.80686	0.887646	-0.00206808	-1.46173	-0.00899099	1.80724	0.206493	0.601254	0.00297363	1.26041	-0.018027	1.22464	0.111331	-0.596396	-0.932249	1.84975	-0.603207
SHFM1	0.605489	0.0234347	0.119956	-0.524739	0.0807493	-0.64507	-0.706364	-0.830907	-0.846591	-0.223848	0.104342	0.208314	0.683058	-0.184441	-0.992641	-1.02141	0.480878	1.28668	-0.00738045	0.447504	0.324983	0.320388	0.106323	-0.371381	-0.000932805	0.371501	-0.359456
SHMT2	0.83466	0.020471	0.1094	-0.545736	0.288924	-0.833341	-0.77707	-0.855214	-0.883294	0.0138781	0.0606251	1.07262	0.166298	1.2286	-0.727612	-0.631433	-0.936014	-0.485873	0.683188	1.10946	1.55669	0.160661	0.192318	-0.438211	1.06036	0.939427	-0.327697
SIRT7	0.699431	0.00227543	0.0230362	-0.387122	0.312309	-0.246712	-0.651496	-0.487116	-0.658451	-0.131259	-0.1477	-0.160281	0.436308	-0.082433	0.837282	-0.345019	0.0070725	-0.0175219	0.121181	0.654735	1.14146	0.633454	0.11747	0.892719	0.0432031	1.01211	-0.294791
SIX4	0.839319	8.82069e-05	0.00206357	-0.614328	0.224991	-1.12884	-1.03789	-0.421102	-0.683078	-0.10197	-0.313085	0.910323	0.209838	0.186456	0.167874	-0.0116097	-0.529953	0.294157	0.608964	0.319605	0.440644	-0.177578	0.0765612	-0.0541437	0.80057	-0.0257784	0.383926
SKA2	0.91613	0.00552804	0.0439019	-0.624053	0.292078	-0.798381	-0.886393	-0.91629	-1.0649	0.117014	-0.195367	0.435326	1.64412	0.91466	-0.555582	-0.501555	-0.327547	0.377581	0.109808	-0.0589094	0.906183	0.726725	0.107925	1.41542	-0.123578	0.459876	-0.857219
SKA3	0.914605	1.31474e-05	0.00047623	-0.678878	0.235728	-0.61238	-0.358279	-0.581371	-0.460835	-1.21148	-0.848918	-0.132535	0.95321	0.383422	0.121083	0.452055	-0.254961	0.580198	-0.172847	0.134283	0.461501	0.15353	-0.144608	-0.108768	0.728938	0.5629	0.0542452
SKAP1	0.919143	0.00364378	0.0321766	-0.640902	0.278241	-0.531337	-0.408482	-0.256129	-0.257065	-1.0289	-1.3635	0.955894	1.74623	-0.346054	0.209936	0.127191	0.387244	-0.44406	-0.0562285	0.259917	0.156735	0.965782	0.679498	-0.533054	-0.836627	0.211621	0.967827
SKIL	0.601881	0.0126328	0.0780816	-0.399936	0.201945	-0.591771	-0.607783	-0.349037	0.00585833	-0.197	-0.659883	-0.738146	0.57046	0.00454918	0.52106	1.52495	-0.0157455	0.47468	0.00820632	0.737971	0.739673	0.135963	-0.10466	-0.206817	-0.0671483	-0.272581	-0.0812994
SKP2	0.651194	0.0037416	0.0328125	-0.470736	0.180458	-0.356933	-0.612606	-0.491013	-0.444695	-0.08857	-0.830598	0.484421	0.19656	0.353876	0.419405	-0.302821	-0.78414	0.0290109	0.182351	0.82631	-0.248771	0.752589	-0.0027119	1.1222	0.0912678	-0.294537	0.0623217
SLBP	0.878604	0.00904792	0.0619668	-0.667485	0.211118	-1.13068	-0.884999	-1.0525	-0.993781	0.129031	-0.0719853	-0.396293	0.0726943	0.32826	-0.14896	-0.697111	0.20825	-1.00148	0.783217	0.282409	1.16239	0.615087	0.589686	1.21715	-0.793529	1.28668	-0.130546
SLC12A7	0.692921	0.00215688	0.0221423	-0.495942	0.196979	-0.31007	-0.773494	-0.297935	-0.511816	-0.578639	-0.503701	0.858098	0.132106	-0.195276	-0.383302	0.134135	0.498791	-0.772956	0.160338	0.670799	-0.0182107	0.684477	0.232094	0.742376	-0.404309	0.81778	-0.00527881
SLC16A10	0.685082	0.0103004	0.067586	-0.422495	0.262587	-0.411921	-0.495691	-0.17736	-0.240231	-0.521501	-0.688265	-0.563697	0.0680426	0.899808	0.0965373	-0.189608	-0.500768	-0.0498783	0.608627	1.95586	0.260077	0.0164535	0.291059	-0.159902	0.490216	0.265471	0.713088
SLC1A3	0.688644	0.0238155	0.12125	-0.414143	0.274501	0.130897	-0.505083	-0.286869	-0.270119	-1.04481	-0.508877	1.45004	1.2847	-0.555781	-0.352146	0.0629397	0.175707	-0.655397	1.2673	0.227848	-0.0255024	0.668431	-0.700854	0.225597	0.302615	0.103037	0.91347
SLC25A10	1.08703	0.000306655	0.00528314	-0.728404	0.358627	-0.999059	-1.04748	-0.389265	-0.618135	-0.874235	-0.442251	0.0658865	0.760136	0.215552	0.960436	-0.158754	-0.366222	0.241212	-0.03442	1.47718	0.931013	0.852697	0.0899421	0.706945	-0.461061	1.10105	-0.643549
SLC25A11	0.716221	0.0014402	0.0163708	-0.624046	0.0921751	-0.586873	-0.719383	-0.827616	-0.901623	-0.590896	-0.117886	-1.01564	0.208993	-0.273344	0.135278	-0.364367	0.0330801	0.083006	-0.374037	0.348294	0.636719	0.930142	0.447152	0.146899	0.546808	0.020578	-0.034759
SLC25A32	1.18974	0.000689221	0.00968636	-0.743911	0.445828	-1.59367	-0.742941	-1.13635	-0.672262	-0.0644017	-0.25384	-0.0638282	-0.262117	-0.0486387	0.649285	1.02124	-0.698428	0.750182	0.659613	0.70873	1.17403	1.7868	0.478478	0.591244	-0.707661	1.14146	-0.0471439
SLC25A33	1.84573	5.59282e-06	0.000249929	-1.40166	0.444071	-1.68291	-1.69085	-1.38059	-1.38965	-0.876327	-1.38965	-0.252257	1.15676	1.46721	0.324983	-0.063379	-0.643961	0.629873	0.303957	2.34396	1.28281	0.446294	0.363383	0.0319978	-0.345143	-0.191978	0.250619
SLC25A38	0.78038	0.0333576	0.153051	-0.540706	0.239673	-1.03572	-0.55118	-0.912682	-0.926964	-0.0526541	0.234959	1.17804	1.62	0.987533	-0.725231	-0.517933	-0.591328	0.139175	0.0959585	0.173273	0.436891	0.40479	1.11505	-0.243255	1.21826	-1.32306	-0.133382
SLC25A39	0.646292	0.00917766	0.0625982	-0.402552	0.243741	-0.653833	-0.352539	-0.314862	-0.635449	-0.49995	0.0413235	-0.184168	-0.480575	-0.340775	0.352573	-0.0521092	-0.619016	0.221589	-0.205298	0.315138	1.22786	0.780505	0.780075	1.15032	0.44966	0.17296	0.331106
SLC25A5	0.72937	0.0303993	0.143528	-0.718543	0.0108271	-0.696784	-0.97587	-1.55335	-1.35569	0.0904998	0.179938	-0.914613	-0.764354	0.382134	1.2781	-0.97935	0.336116	0.243629	-0.0426173	0.673705	0.41721	0.514027	0.307336	-0.376458	-0.861862	0.625726	-0.665493
SLC26A7	0.776147	0.0198651	0.107027	-0.477081	0.299066	-0.315977	-0.517103	-0.340452	-0.332025	-0.63623	-0.720699	0.408413	-0.132954	0.931013	0.715787	0.0832621	-0.485125	1.95586	-0.0628311	-0.754749	0.0920813	-0.611127	-0.273538	1.60522	1.09623	-0.12073	0.338245
SLC27A2	0.679019	0.0151681	0.0884684	-0.372547	0.306472	-0.3243	-0.617151	-0.249322	-0.378412	-0.263578	-0.402519	1.08489	-0.68061	1.42775	0.0621126	-0.467335	0.593164	1.07993	0.903692	-0.750027	-0.137146	0.521831	0.114861	0.0661974	0.0747362	0.799348	0.210153
SLC27A3	0.678425	0.0357418	0.160549	-0.293351	0.385074	-0.17728	-0.36158	-0.225806	-0.411376	-0.262573	-0.32149	-0.84572	-0.157545	-0.239471	0.93989	-0.408959	1.74	0.810826	0.651601	0.449001	0.333632	2.09978	0.357937	0.111489	0.301556	-0.40967	0.426836
SLC2A1	1.06924	0.000845786	0.0112379	-0.775589	0.29365	-0.373706	-0.592611	-0.188876	-0.528952	-1.59367	-1.37572	0.602721	1.99042	0.119024	0.280665	-0.0561426	0.647144	-0.348557	0.144485	0.812883	-0.349467	-0.274831	0.132763	0.952111	-0.0297404	-0.425134	0.500047
SLC2A6	0.637717	0.0135957	0.0822281	-0.271349	0.366367	-0.0860102	-0.32812	-0.326901	-0.452882	0.0300071	-0.46419	1.17295	1.15504	-0.0830434	0.780236	-0.569446	-0.734519	-0.00628814	-0.252379	0.401326	0.358616	0.604309	0.91347	0.584787	-0.00722708	0.937215	0.606823
SLC30A9	0.601258	0.0463265	0.189514	-0.42583	0.175428	-0.328976	-0.988435	-1.08429	-0.499287	0.289125	0.056883	0.160931	-0.421317	-0.433843	-0.88566	-0.333085	0.170047	0.907314	-0.271616	0.360192	1.33713	-0.0396867	0.60827	0.535743	-0.635891	0.65547	1.09285
SLC34A2	1.81808	0.00212112	0.0218609	-1.68438	0.133703	-1.77196	-2.45963	-2.2209	-1.96496	-0.370568	-1.31823	2.11014	0.160931	-0.553803	0.13137	-0.0316555	1.58442	0.91236	-1.21643	0.117225	0.995924	-0.0064054	0.973183	0.296927	-0.326385	-3.54383	0.535287
SLC35A3	0.789682	0.00317039	0.0292494	-0.595906	0.193776	-0.697968	-1.1538	-0.71884	-0.588877	0.119024	-0.534982	-0.11917	-0.347082	-0.751481	-0.0797449	0.476819	-0.710652	0.478848	0.532702	0.229501	0.225194	0.167391	0.481286	0.987533	-0.017201	0.182863	1.36361
SLC35F2	1.25019	4.83054e-05	0.00130951	-0.908513	0.341676	-1.18744	-0.723023	-0.639131	-0.486382	-1.24281	-1.1723	1.11619	0.376183	-0.00542045	-0.278102	-0.475054	-0.419285	1.04194	0.695455	0.644585	0.823847	0.698615	0.829455	0.808145	-0.803788	0.520646	-0.106602
SLC38A1	0.674895	0.0128962	0.0792333	-0.372538	0.302357	-0.799774	-0.747703	-0.467794	-0.328863	0.0803709	0.0285369	-0.164515	0.296179	-0.316814	0.0627287	-0.00811962	-0.397128	0.795949	0.759905	0.562485	0.830297	-0.270681	-0.298519	1.10017	1.59245	-0.147189	0.440516
SLC39A1	0.602021	0.00143017	0.0162879	-0.503894	0.098127	-0.611903	-0.779098	-0.692098	-0.714651	-0.0913573	-0.134259	-0.0557429	0.398262	0.111304	-0.126877	0.181266	-0.800553	0.317123	0.0266955	0.0927674	0.665943	0.393689	0.533277	-0.411645	-0.113628	0.325374	0.0327777
SLC39A11	0.807379	0.00275613	0.0265126	-0.521498	0.285881	-0.618281	-0.850365	-0.524486	-0.687376	-0.0257784	-0.422702	0.687991	-0.134232	-0.0870294	0.783217	0.903988	0.013181	-0.52327	-0.892315	0.294696	0.958739	0.500681	0.42834	0.882629	-0.46419	0.937554	0.284121
SLC39A4	1.6843	0.000920948	0.0119928	-1.58449	0.0998076	-1.87957	-1.44521	-1.19075	-1.22119	-1.92447	-1.84577	0.73118	0.245187	0.0134802	0.160338	-0.399068	0.255666	-2.5762	0.309425	0.5111	1.63491	1.27243	0.560337	1.64655	-1.244	-0.0694379	-1.45498
SLC39A7	1.0347	0.00371587	0.0326871	-0.616004	0.418692	-0.385085	-1.07512	-0.74195	-0.856718	-0.133308	-0.503842	-0.161	0.723891	0.395047	0.443103	-0.473276	0.852697	2.25907	-0.376868	-0.315237	0.223351	0.389428	0.0295473	0.67426	-0.0559478	0.0175942	2.07341
SLC3A2	0.627661	0.0124382	0.0771863	-0.374785	0.252876	-0.304789	-0.588163	-0.515686	-0.327923	-0.299458	-0.21269	0.0166046	0.108862	0.266348	-0.734306	-0.0350878	0.857243	-0.241099	0.191615	0.565122	0.64269	0.327608	1.55669	0.38354	-0.537149	0.880581	-0.20324
SLC44A2	0.770008	0.0257838	0.12774	-0.577309	0.192699	-1.29432	-1.41862	-0.684413	-0.539928	-0.0569649	0.530384	-1.00838	-0.410413	-0.248189	-0.426909	-0.630211	1.30894	0.709208	0.369547	1.10879	0.880581	0.650221	0.0236826	1.05016	0.169162	0.0157021	-0.478712
SLC44A4	0.706163	0.00982528	0.0656268	-0.446765	0.259398	-0.186889	-0.241173	-0.174309	-0.306098	-0.850008	-0.922113	0.757043	0.131207	-0.106552	0.145161	-0.112288	0.301486	1.34974	-0.522167	-0.445266	0.537924	0.475685	0.403591	0.654493	1.00935	-0.998304	0.56927
SLC4A11	1.28419	0.00485881	0.0398324	-1.05464	0.229547	-0.974547	-1.00312	-0.245536	-1.08164	-1.4668	-1.55619	0.828679	-0.100973	-1.20923	1.86896	-0.758206	1.35303	1.08725	-0.886393	0.328113	0.236106	-1.75285	0.287446	1.57388	-0.11765	0.241727	0.692856
SLC50A1	0.805266	6.75417e-06	0.000288312	-0.607569	0.197697	-0.499408	-0.694888	-0.646217	-0.679943	-0.457858	-0.667101	0.254855	0.0386876	-0.179681	0.497007	-0.376638	-0.0172253	0.675388	-0.109184	0.260846	0.367334	0.410293	0.7591	0.442494	-0.00719861	-0.153303	0.300377
SLC52A2	1.53093	2.74253e-07	2.26531e-05	-1.12937	0.401562	-1.12551	-1.25099	-0.71416	-0.965489	-1.29005	-1.43003	-0.0549849	0.582811	-0.178099	0.0712503	-0.189369	0.682025	-0.14896	-0.446323	0.538797	0.871788	1.04651	0.735493	1.28668	0.231176	0.824431	0.571761
SLC5A1	0.73515	0.0275335	0.134121	-0.348554	0.386595	-0.145744	-0.257806	-0.133596	-0.106602	-0.619386	-0.828192	1.42114	1.36361	-0.159434	-0.0436926	1.68335	0.457695	1.69419	-0.322025	0.00048447	0.714321	0.199245	0.117503	-0.194887	-0.240631	-0.825733	0.320388
SLC5A3	1.09423	0.000786182	0.0106816	-0.864734	0.229494	-0.96687	-1.29005	-0.760104	-0.985868	-0.655563	-0.529953	0.0899992	0.925257	0.212403	-0.552926	1.47718	-0.947113	-0.155671	0.674656	0.579499	-0.00283305	0.216931	0.498883	0.37806	1.01326	-1.17799	0.442301
SLC5A6	0.979494	4.31291e-05	0.00119422	-0.725127	0.254367	-0.797603	-0.754749	-0.483103	-0.209804	-0.993781	-1.11172	0.49737	-0.10079	0.761055	0.264266	-0.344718	0.0148439	0.0933895	0.00454918	0.749378	0.529998	0.395003	-0.0229634	-0.413542	0.987533	0.862149	-0.207656
SLC6A8	0.8826	0.00593393	0.0462786	-0.536025	0.346575	-0.307787	-0.60389	-0.417559	-0.37753	-1.10637	-0.40301	2.01319	0.734095	1.07573	0.821079	0.486229	-0.974547	0.785258	0.275726	-0.224589	0.201169	-0.590372	0.767845	0.124527	-0.152033	-0.249374	0.45127
SLC7A5	1.0376	0.00297007	0.0279997	-0.683718	0.353884	-0.695125	-0.532907	0.157291	-0.655999	-1.41862	-0.956952	0.488651	0.313765	-0.316053	0.00252554	0.398558	0.798853	-0.360603	1.62971	0.886603	0.692143	0.00307031	-0.0425883	-0.236221	-0.587161	2.09387	-0.102983
SLFN13	0.895299	0.00621162	0.0477399	-0.478975	0.416323	-0.372597	-0.566885	-0.477846	-0.632048	-0.0154487	-0.809028	0.00266986	1.12153	-0.229243	-0.445451	-0.808375	0.519135	0.221315	0.472376	0.475918	0.676006	-0.169683	-0.330126	0.886179	1.82981	0.843346	1.59576
SLIRP	0.735571	0.0252061	0.126113	-0.619959	0.115612	-1.04044	-0.681248	-1.17608	-1.11624	0.0256706	0.268589	0.306102	-1.02684	0.507441	-0.0132117	-0.312192	-0.520239	0.121948	0.560545	1.39114	1.0696	0.681846	0.671037	-0.59333	-0.318665	0.213568	-0.888949
SLMO2	0.763019	0.00136988	0.0157344	-0.576831	0.186188	-0.701627	-0.671507	-0.664863	-0.472135	0.0306555	-0.981508	-0.485458	-0.126583	-0.13974	0.0999457	-0.0961972	-0.314029	0.724211	0.112795	0.265074	0.756002	0.575676	0.495488	0.0298873	0.85078	0.880907	-0.649747
SMAD1	0.856443	0.00998637	0.0662477	-0.576791	0.279652	-1.1632	-0.72615	-0.799076	-0.965953	-0.00896148	0.202591	0.780236	-0.104442	-0.19547	-0.240019	1.46153	-0.139068	1.71305	0.0857377	-0.0806087	0.471708	0.326129	0.274652	1.3111	-0.501416	-0.731536	0.04285
SMAP1	0.644066	0.0322942	0.149573	-0.453285	0.190781	-0.538541	-0.694454	-0.723705	-0.86758	0.212794	-0.108225	-0.866919	0.623018	-0.898558	0.197607	0.444701	-0.736154	-0.304848	0.633309	1.27463	0.721186	0.570629	0.376345	1.08135	-0.277909	0.481286	-0.267177
SMARCC1	0.757839	0.000374077	0.00609173	-0.55747	0.200369	-0.613018	-0.652943	-0.539379	-0.646395	-0.583882	-0.309204	0.0682417	-0.477846	0.476234	-0.164449	-0.0642976	-0.256677	0.687465	0.178583	0.1739	0.552979	0.388184	0.715303	0.257165	1.13814	-0.0910808	-0.375946
SMARCD2	0.878405	0.00172334	0.0186977	-0.681352	0.197053	-0.667349	-0.787034	-0.972764	-1.05419	-0.371817	-0.234963	0.931724	1.47913	-0.611531	-0.572075	0.315138	0.0719075	0.525171	-0.74195	0.165587	0.897537	0.184602	0.171375	0.191931	-0.244918	0.473667	-0.0844487
SMC2	1.12335	0.000290091	0.00506276	-0.727423	0.395924	-0.305917	-1.43651	-0.651496	-0.667349	0.00490221	-1.30816	-0.477022	0.0496213	-0.150426	0.594042	-0.17728	-0.199359	0.531698	0.342583	1.2879	0.876074	0.884042	0.351704	1.20519	0.47419	1.14372	-0.4019
SMC4	1.32132	1.45982e-06	8.63067e-05	-1.02869	0.29263	-1.01508	-1.56043	-0.904903	-0.813972	-0.401534	-1.4762	-0.248189	-0.0597805	0.58492	0.784414	-0.452764	-0.0334004	0.419819	0.665943	1.0833	0.282994	0.865897	0.168133	0.200046	0.427112	0.340152	-0.346521
SMC6	0.86719	0.00057386	0.00847639	-0.648092	0.219099	-0.245075	-1.18015	-0.658247	-0.501817	-0.0439408	-1.25932	0.661517	-0.521844	-0.0326073	0.0795649	-0.256466	1.10326	0.260363	0.367183	0.404223	0.46326	0.018591	-0.147849	-0.422029	0.958739	0.519523	0.050146
SMIM13	0.640998	0.00766601	0.0553635	-0.413428	0.22757	-0.397069	-0.663596	-0.608635	-0.40301	-0.0622852	-0.345972	-0.187025	-0.937886	0.228932	1.11244	-0.177206	-0.436265	0.53637	0.0357973	0.548263	0.181227	0.731605	-0.212006	0.445221	0.929325	0.595728	0.246603
SMIM22	0.951229	0.00192996	0.0205002	-0.730198	0.221032	-0.447799	-0.0905898	-0.463722	-0.352202	-1.50826	-1.51862	1.01211	1.30008	0.619346	0.805731	0.171375	-0.240095	-0.615402	-0.0421035	0.13913	0.404065	0.180659	0.562485	0.392045	-0.276858	-0.966399	0.0903328
SMKR1	1.01304	0.0137909	0.0828611	-0.735084	0.277955	-0.744584	-0.720165	-0.459626	-0.950414	-0.65454	-0.881174	0.91164	1.56751	-0.735878	0.621135	-0.480333	-0.209804	0.895995	0.366002	0.378978	0.689469	1.79292	0.434589	-1.61121	-1.42177	1.0273	0.220734
SMN1	1.05738	6.39877e-05	0.00160179	-0.931408	0.125975	-0.862501	-1.03334	-1.0105	-0.6248	-0.901623	-1.15569	0.332427	-0.607282	-0.0787483	0.178801	0.254224	-0.715952	0.686995	0.93575	-0.647614	0.453305	0.0793103	0.25354	-0.0273925	0.438372	-0.480575	0.960436
SMPDL3B	0.662551	0.0042882	0.036433	-0.589488	0.0730626	-0.443069	-0.683775	-0.229596	-0.304721	-0.671892	-1.20387	-0.727275	0.690824	0.622573	0.575851	0.139175	-0.465915	-0.191625	0.0744006	0.148711	0.302252	0.460122	0.394592	0.135352	0.312856	-0.850008	-0.452882
SNHG17	0.616895	0.00177613	0.0191417	-0.435476	0.181419	-0.404239	-0.513854	-0.472369	-0.156386	-0.62294	-0.443069	0.290018	-0.430571	0.472129	-0.267112	-0.340863	0.688396	0.496428	0.457256	0.0135771	0.277427	0.0560119	0.409255	-0.0794511	0.369487	0.964608	-0.473898
SNORA5B	0.730539	0.000229425	0.0042401	-0.602922	0.127617	-0.633852	-0.350783	-0.527784	-0.86621	-0.636734	-0.60217	-0.0509102	0.107681	-0.00118246	0.166202	0.00526525	-0.719554	0.223459	-0.00665062	0.724694	0.558143	0.728468	0.283277	0.366831	-0.268207	0.387702	-0.463354
SNORA72	0.713095	0.0408602	0.175137	-0.315221	0.397874	-0.00811962	-0.420999	-0.137847	-0.201775	-0.343488	-0.779098	0.101857	-0.338907	0.150689	1.01757	-0.0311197	0.697346	2.36929	0.647956	0.0103098	0.3378	-0.298519	0.0376089	-0.155627	0.788622	-0.822854	1.85396
SNRNP48	0.632815	0.00931666	0.0632538	-0.426381	0.206434	-0.445266	-1.04423	-0.483469	-0.574624	0.276685	-0.287381	-0.089245	-0.564139	0.61699	0.554937	-0.424421	-0.633526	0.71922	0.968428	0.417509	0.179353	0.342652	0.392132	0.221008	0.851605	-0.340198	0.0906334
SNRPB	1.19016	0.000910778	0.0118871	-1.09833	0.0918304	-1.07416	-0.890443	-2.1006	-1.32603	-0.923731	-0.27503	-0.0842879	-1.58606	0.855883	0.203038	-0.852012	-1.04858	0.902975	0.520747	0.594489	0.699776	0.0516458	0.411029	0.319023	0.559747	-0.293757	0.215632
SNRPD1	0.959645	0.0044948	0.0377814	-0.647903	0.311742	-0.834859	-0.652412	-0.958414	-1.11109	-0.305757	-0.0248863	0.479697	-0.934493	1.76278	0.0073768	-0.802191	-0.478601	0.734095	0.284728	0.795247	0.867898	0.720353	-0.101724	0.734609	0.754332	0.761055	-0.597291
SNRPF	0.762079	0.00385711	0.0335937	-0.618717	0.143361	-0.932249	-0.701627	-0.694888	-0.748353	-0.338136	-0.297051	0.552087	-0.31139	1.10564	0.611846	-0.502319	-0.981957	0.331983	0.374953	0.646843	0.523919	0.164768	0.0285369	-0.893625	0.52956	0.232839	-0.119896
SNRPG	1.023	0.000574502	0.00848039	-0.918865	0.10414	-0.857219	-1.04228	-2.09136	-1.51862	-0.0326869	0.0289766	-0.131011	-0.0705911	0.117827	-0.208352	-0.969234	0.525754	0.471926	0.20726	0.543058	0.555435	0.326404	0.230726	0.184926	0.506938	-0.016583	-0.608241
SNTB1	0.852749	0.00199693	0.0209682	-0.545253	0.307496	-0.120646	-0.64233	-0.344502	-0.469852	-0.769504	-0.924687	-0.14876	0.542582	-0.575973	0.85078	-0.137669	1.25245	0.384336	-0.426466	-0.102504	0.395554	-0.400623	1.32661	0.835056	0.145802	0.789849	0.188906
SORD	1.11157	4.77363e-05	0.00129716	-0.710272	0.401297	-0.663438	-0.820818	-0.67958	-0.821626	-0.698832	-0.577336	0.788925	-0.707151	-0.266147	-0.284853	0.801143	0.974529	0.229439	0.234333	0.857691	0.700293	0.84587	-0.174023	0.692348	0.653381	-0.074041	1.14902
SORL1	1.06223	0.0115747	0.0732991	-0.550531	0.511699	-0.702701	-0.923224	-0.128404	-1.07071	-0.245009	-0.233144	1.68927	2.17377	0.201016	-0.00557689	-0.070124	-0.181458	-0.0924807	1.52875	-0.195408	0.507856	-0.329377	1.67293	0.107169	0.0338697	-0.86621	2.01319
SORT1	1.08085	1.48828e-05	0.000528094	-0.833794	0.247061	-0.524893	-1.10567	-0.556909	-0.722867	-0.667957	-1.42446	0.165014	-0.0969639	0.657745	0.722268	0.953894	-0.536891	0.682025	0.032286	-0.054964	0.484792	-0.413266	0.575531	0.629226	-0.198845	0.0114936	0.339634
SOWAHA	0.950193	0.0227483	0.117649	-0.513947	0.436245	-0.2848	-0.181321	-0.101903	-0.283914	-1.04171	-1.19003	-0.141657	1.30988	1.63491	0.269689	0.277272	-0.358768	1.84975	-1.11708	0.408535	0.0463267	-1.27277	1.16316	0.546063	0.631527	-0.139691	1.87279
SOX17	3.42825	1.54264e-07	1.45208e-05	-3.37811	0.0501358	-3.54383	-3.31756	-2.26904	-3.65484	-3.93959	-3.54383	-0.206521	-0.00369604	0.53637	0.322783	0.349714	-1.40964	-0.130225	1.17021	0.0115368	0.22149	0.0764763	1.25711	0.0323645	1.05622	-3.42101	0.938979
SOX9	2.21544	2.48319e-06	0.000129715	-1.73481	0.480631	-2.01606	-1.87244	-1.10314	-1.57549	-1.79876	-2.04298	1.73496	1.86896	-0.196484	-0.370914	0.00636781	1.49298	-0.0111981	0.969867	0.123616	0.464215	0.4468	1.02621	-0.983555	-0.848174	0.491029	1.47542
SPAG1	1.4742	0.000387103	0.00624166	-1.06578	0.408422	-1.48895	-1.35116	-0.811249	-1.13545	-0.227266	-1.38059	-0.299929	1.48608	-0.260378	1.42775	0.966199	1.16007	-0.206979	-1.07742	0.358867	0.780793	0.647591	0.250241	1.26232	-1.34161	1.10402	0.277147
SPAG4	0.729365	0.0467641	0.19069	-0.253843	0.475522	-0.25173	-0.437883	-0.18672	-0.265087	-0.218602	-0.163035	1.08959	1.7532	-0.532786	1.4407	-0.235017	0.354699	-0.853952	0.164265	1.5307	0.26745	0.348227	2.08304	0.574112	-0.573059	-0.195318	0.392503
SPAG5	1.03328	0.0020541	0.0214405	-0.61447	0.418809	-0.473526	-0.539928	-0.373101	-0.406524	-0.896577	-0.997164	-0.142216	0.913885	1.72996	-0.432472	0.139379	-0.585963	-0.799774	0.244213	0.657432	1.4127	0.286118	0.734095	0.523547	1.29052	0.921359	-0.191843
SPAST	0.770473	0.00707954	0.0523868	-0.493422	0.277051	-0.671507	-0.634389	-0.761218	-0.717163	0.00142925	-0.177684	-0.220625	0.37907	0.720067	0.286975	-0.571372	-0.845369	0.603184	0.5249	0.942661	1.01757	-0.0601345	0.480071	0.151826	1.50121	-0.526048	0.0488287
SPATA17	1.07705	0.00360009	0.0318799	-0.698151	0.378902	-0.622365	-0.832526	-0.339601	-0.590517	-0.760384	-1.04352	0.37368	0.649668	1.37874	-0.768885	-0.0227274	-0.813746	0.240844	0.284666	0.640684	0.302565	0.562348	1.12763	1.43863	-0.343412	-0.919803	1.93155
SPATC1L	1.26531	0.00011178	0.00246152	-0.855708	0.409605	-0.710652	-0.696604	-0.771115	-0.990917	-1.30671	-0.658247	0.718718	-0.189325	-0.740844	1.29483	0.538505	-0.0459497	0.876412	-0.183962	0.565283	-0.201439	0.61334	2.03503	0.0958267	0.46243	0.691053	0.0237616
SPC24	0.618856	0.000126976	0.0027279	-0.456594	0.162263	-0.327547	-0.546931	-0.0729446	-0.185939	-0.911074	-0.695125	-0.315937	-0.00372812	0.399818	-0.247775	-0.163003	0.215879	0.366728	0.208688	0.449915	0.296645	0.289046	0.145589	0.483501	0.189262	0.41932	-0.137743
SPC25	2.01993	0.000117272	0.00255786	-1.56714	0.45279	-1.39422	-1.74785	-1.27416	-1.68744	-1.85194	-1.44723	-1.34459	1.12315	1.43601	1.99042	1.14614	-0.701627	0.197607	0.160868	0.484092	2.47864	1.40877	0.23445	-0.216265	-0.86621	0.704625	-0.991439
SPDL1	0.997165	0.000928257	0.0120453	-0.737029	0.260136	-0.818564	-1.21266	-0.55045	-0.827917	0.083006	-1.09559	-0.582902	-0.0530477	0.0989484	-0.216556	0.369205	0.0302748	0.664214	1.31997	0.392503	0.637264	-0.175249	0.324681	-0.425912	-0.170385	0.248899	1.70026
SPHK1	0.616064	0.0146141	0.0861112	-0.513545	0.102519	-0.521844	-0.487565	-0.387277	-0.359827	-0.573597	-0.751161	-0.489281	0.452055	-0.0334861	0.142426	-0.048041	1.01559	0.264137	-1.08043	0.0716594	0.261817	0.253951	0.442786	0.229895	-0.594165	1.22579	-0.474398
SPIN4	1.25628	0.00156699	0.0174636	-0.941326	0.314957	-1.29602	-1.29432	-1.40013	-1.25259	0.178801	-0.583703	-0.515216	-0.088342	-0.198538	-0.767285	-0.696454	1.01683	0.0939761	0.563846	2.29785	1.23265	0.364801	0.0759322	-0.325479	0.11126	0.835984	1.03749
SPINT2	1.4436	9.24708e-05	0.00213926	-1.35796	0.0856323	-1.59718	-1.52388	-2.24627	-1.64912	-1.19963	0.0682813	-0.307862	-1.34161	-0.982938	0.519024	-0.322982	-0.275472	0.759905	0.245742	0.209524	0.690552	0.570251	0.900579	0.698408	0.0107407	-0.0177671	0.0140183
SPNS1	0.718128	0.00336494	0.0305251	-0.423023	0.295105	-0.0722402	-0.921661	-0.81198	-0.586378	-0.0645027	-0.0813735	-0.136209	0.500285	1.27632	0.356217	-0.0448031	-0.598236	-0.038425	0.430396	0.643093	0.450616	0.000436528	0.55124	-0.433843	0.294914	0.368628	1.10105
SPON1	1.91157	1.51208e-05	0.000532251	-1.45924	0.452332	-1.90582	-1.42177	-1.795	-2.04298	-0.31278	-1.27708	1.50831	1.29269	-0.332738	0.497997	-0.237795	-0.750233	1.01515	0.221697	-0.519154	0.521831	0.152592	1.04248	0.916805	1.42575	-0.883294	1.36522
SPP1	1.14794	0.00123299	0.0147007	-0.959685	0.188258	-0.659073	-1.50009	-0.333838	-1.25611	-0.802191	-1.2068	0.165071	0.340332	-0.87457	1.17295	1.16069	-0.0666681	0.701462	-0.133789	0.407621	0.302781	0.659081	1.01464	0.709208	-1.39169	-0.460835	-0.694156
SPRYD4	0.801683	0.000692995	0.00972426	-0.698345	0.103338	-0.466963	-0.922113	-0.285182	-0.64233	-1.16712	-0.706364	0.110548	0.0450548	0.0466618	0.367494	0.458056	-0.892841	-0.0694965	-0.755027	0.675214	0.722553	0.229439	0.449093	0.235472	0.572667	-0.449292	-0.0921911
SPSB2	0.952127	0.00260999	0.025509	-0.597619	0.354508	-0.606575	-0.551393	-0.470941	-0.657755	-0.837518	-0.461531	0.73513	0.116595	0.821578	0.28855	-0.908461	-0.472007	-0.114638	-0.0575059	0.561189	0.64288	0.444389	1.63491	1.27316	-0.758618	1.12093	0.344053
SQLE	0.606825	0.0141977	0.0846276	-0.439122	0.167703	-0.802636	-0.802191	-0.564295	-0.495336	0.531546	-0.501817	0.0436044	0.126279	-0.678961	0.71922	-0.457858	-0.381277	1.10017	0.361261	-0.11349	0.404366	0.71922	0.217847	0.184172	0.737214	0.0627714	-0.361289
SRD5A1	1.38889	2.70973e-05	0.000823642	-1.04852	0.340378	-1.3389	-1.06615	-0.917132	-1.19003	-0.798678	-0.980202	0.135224	1.07193	0.013975	-0.808375	-0.169188	-0.449043	0.695455	0.238585	0.331724	0.279515	0.128625	0.525063	1.20877	-0.450897	1.19348	1.50121
SRD5A3	1.17551	0.00105062	0.0130901	-0.699333	0.476177	-0.557719	-0.934493	-0.803311	-0.843278	-0.477022	-0.580174	-0.361953	0.869307	-0.149247	1.20166	0.920692	0.742874	-1.10233	-0.21813	-0.206727	0.736667	0.773418	2.08635	1.36884	0.0798189	0.706222	0.171375
SRFBP1	0.585844	0.00982681	0.0656268	-0.389025	0.196819	-0.349154	-0.540808	-0.515216	-0.236952	-0.00161738	-0.690403	-0.573387	-0.698187	-0.322741	-0.106403	-0.187708	0.534809	0.630067	0.774896	0.0234765	0.767536	0.302081	0.158972	0.118334	0.201647	1.05368	0.472029
SRPK1	0.870792	1.91678e-06	0.000105932	-0.767785	0.103007	-0.824868	-0.692562	-0.596936	-0.697411	-0.859375	-0.935557	0.561189	0.106626	0.0275408	-0.240951	-0.269822	-0.23856	0.728468	-0.244011	-0.21336	0.0191324	0.2002	-0.0211937	0.183828	0.0884045	0.498197	0.46243
SS18L1	0.87767	0.00136382	0.0157121	-0.531751	0.345919	-0.626487	-0.97935	-0.800365	-0.652412	0.0675978	-0.199488	-0.397752	-0.000788043	1.0531	0.281082	-0.348054	-0.250208	0.974157	0.909928	0.925816	0.704211	-0.295179	0.533537	1.05403	0.667461	-0.233245	-0.0433864
SS18L2	0.604246	0.00612343	0.0472526	-0.389826	0.214419	-0.673467	-0.347812	-0.687064	-0.690938	0.0681345	-0.00781137	0.281938	0.576816	0.513274	-0.385896	-0.154788	-0.234419	0.817536	0.146147	0.422578	0.683377	0.900257	0.545463	-0.0920698	0.284891	-0.378703	-0.495691
SSB	1.203	2.2886e-05	0.000731427	-0.943547	0.259456	-0.887533	-1.49146	-1.20284	-0.905594	-0.162209	-1.01164	0.0746208	-0.0806087	-0.221145	1.00274	-0.637298	-0.213945	0.792183	0.558018	0.678501	0.618843	0.644154	0.382134	0.269626	-0.0170418	-0.545354	0.84587
SST	2.52972	0.0167457	0.0944161	-0.96663	1.5631	-1.03642	-0.776837	-0.239771	-0.769504	-1.46899	-1.50826	-1.21582	-0.423904	-0.646938	1.4343	2.99065	1.5307	-1.45775	2.81994	4.89619	6.77149	5.32145	1.55273	0.92397	0.510288	-1.75771	1.75994
ST14	0.946843	5.38038e-05	0.0014085	-0.833586	0.113258	-1.20197	-1.28593	-0.455217	-0.844089	-1.1518	-0.0625026	0.144003	0.44814	0.0231107	0.0544792	-0.364481	0.26332	-0.146937	0.274366	0.359995	0.558018	0.518721	0.534181	-0.890959	-0.209804	0.0872475	0.158718
ST3GAL6	0.601511	0.0167953	0.0946259	-0.325927	0.275584	0.295262	-0.556623	-0.12193	-0.624552	-0.394985	-0.552734	0.244925	0.860168	0.317123	-0.325784	-0.0336602	-0.363354	0.703054	-0.397752	0.535287	0.575851	-0.0822401	0.268589	0.662992	-0.61863	0.654005	1.40877
ST6GALNAC1	2.38523	0.00433568	0.0367273	-1.39608	0.989154	-1.85858	-1.3578	-0.00157941	-1.29311	-2.23005	-1.63538	1.30142	0.0732711	-1.01118	2.49842	3.38992	-1.41862	2.92363	-1.27708	-1.73067	2.97456	1.47231	2.92363	1.95088	0.288977	-1.36654	2.83352
ST6GALNAC2	1.71533	0.00333304	0.0303057	-0.865796	0.849532	-0.472007	-1.30992	-0.857735	-0.823882	-0.580346	-1.15088	1.64872	3.55598	-1.00148	1.39902	2.09387	-0.164123	2.58181	-0.0123596	0.34447	0.752011	-0.523665	0.728209	1.29172	-1.15757	0.0165031	2.03941
STARD7	0.90822	0.00136745	0.0157143	-0.829717	0.0785029	-0.937886	-1.21027	-1.41862	-1.47395	-0.130511	0.192938	0.815504	-0.110499	-0.520821	0.259781	-0.688971	0.438095	0.725394	0.161631	0.804706	0.189389	0.199473	0.0828447	-0.564295	0.0856184	-0.497862	-0.12394
STAU1	0.690278	0.0140517	0.0840415	-0.566708	0.123571	-0.935557	-0.752884	-1.07742	-1.08043	0.242779	0.203267	-0.0115354	-0.25434	0.0596276	-0.544501	-0.74195	-0.419072	0.981388	0.484324	1.18924	0.37343	0.300308	0.638927	-0.415875	0.0834337	0.425719	-0.171999
STC2	0.856403	0.00409564	0.0351098	-0.466885	0.389518	-0.302607	-0.445701	-0.182927	-0.290915	-0.586522	-0.992641	0.0023076	1.20287	-0.240879	1.14682	-0.311468	1.3358	0.0903328	1.20166	0.476819	1.11619	-0.762671	0.30514	0.0558828	0.125981	-0.234244	0.721742
STIL	1.8205	1.76945e-09	4.21719e-07	-1.66507	0.155427	-1.18605	-1.94711	-1.08807	-2.05253	-1.81585	-1.90083	-0.103676	-0.318263	0.033393	-0.426004	-0.0477645	0.0572104	0.0755832	0.212028	0.366728	0.622405	0.287799	-0.394397	0.458574	0.0669927	0.466306	1.12992
STK38L	0.925471	0.0084633	0.0593443	-0.503772	0.421699	-0.648955	-0.753226	-0.972318	-0.695674	0.143694	-0.0961534	-0.404854	-0.165922	-0.504397	0.112991	0.930568	-0.169058	2.00911	1.51222	1.20519	1.27632	0.382702	-0.495916	0.094443	0.847219	-0.0712053	0.187762
STON2	1.11043	0.00400731	0.0345859	-0.806433	0.303993	-0.388433	-1.04687	-0.678155	-0.786335	-0.809028	-1.12978	0.0273519	-0.435913	0.869307	0.675751	1.03225	-0.0444684	1.86163	0.839533	0.54045	0.0233664	-0.0806087	-0.784809	0.727046	1.47542	-1.5829	-0.279515
STRA13	0.792338	0.00172236	0.0186977	-0.483084	0.309254	-0.34538	-0.669117	-0.56643	-0.575093	-0.582902	-0.159579	-0.00135523	0.213995	0.508286	0.276953	-0.0193338	1.00005	-0.575585	-0.00527881	0.075806	1.15032	0.860168	0.823289	0.427112	-0.338565	1.02494	-0.472744
STYK1	0.779335	0.0391881	0.170558	-0.488738	0.290598	-0.636552	-0.409315	-0.13771	-0.448296	-0.636552	-0.664001	0.235656	2.25025	-0.0925433	0.675214	-0.487565	1.55273	-0.955999	-1.18101	-0.0420719	0.327288	0.287969	-0.184076	0.586897	0.407256	1.47913	-0.20956
SUDS3	0.722935	0.0442119	0.184257	-0.383268	0.339667	-0.30734	-0.550308	-0.791893	-0.678701	-0.0470648	0.0756974	0.609732	-0.362358	0.00182806	-0.999658	0.162908	0.0420318	1.72413	0.685736	0.677892	0.712289	-0.669117	0.050146	-0.245298	1.99042	-0.329823	1.38382
SULT1C2	0.76049	0.0165037	0.0935116	-0.565831	0.194659	-0.327985	-0.459626	0.0451257	-0.367708	-1.05183	-1.23296	-0.466963	-0.704664	0.946341	0.0191979	0.53559	-0.759518	0.0500073	0.132323	-0.22678	1.37059	0.542291	0.291341	0.318342	1.52626	-0.6928	0.232976
SUMO1	0.70493	0.00312354	0.0289573	-0.546706	0.158224	-0.485335	-0.424957	-1.16446	-1.0314	-0.0745426	-0.0995455	0.149684	-0.588448	-0.459513	-0.440706	-0.262178	0.71487	0.701689	0.16666	0.100943	0.415213	-0.0148313	0.264653	0.356656	0.647144	-0.167487	0.947236
SUPT16H	0.695254	0.0247324	0.124423	-0.445483	0.249771	-0.70855	-0.598236	-0.955569	-0.567878	0.0867543	0.0705797	-0.143981	-0.500477	-0.00777842	-0.124867	-0.467689	0.560337	1.32661	0.349158	0.736146	0.033422	-0.0849982	0.799348	0.11277	1.09389	-1.06429	1.37874
SUSD2	0.594995	0.0398294	0.172333	-0.222796	0.372199	-0.070124	-0.551911	-0.296922	-0.283119	0.0214427	-0.156143	0.0249658	1.69178	-0.466741	1.5389	-0.122404	-0.20956	0.376345	0.545956	0.363228	0.738471	0.740158	0.740158	-0.548604	-0.171863	-0.293711	1.0081
SUSD4	0.679211	0.0418061	0.177892	-0.293101	0.38611	-0.197278	-0.0442861	-0.015179	-0.374835	-1.01417	-0.112863	-0.128774	0.798853	0.53104	0.593332	-0.25522	0.691053	-0.348642	0.213568	-0.984081	1.48216	0.528976	1.87539	0.036782	0.0163914	-0.353743	1.48067
SUV39H2	0.657512	0.00029005	0.00506276	-0.558656	0.098856	-0.803788	-0.77219	-0.427194	-0.698187	-0.386326	-0.264251	0.151579	-0.570359	0.215786	-0.202749	-0.105691	-0.719383	0.53891	0.0588797	0.185197	0.355072	0.3378	0.182562	0.474785	0.232593	0.349252	0.0974609
SVOPL	0.768818	0.0190816	0.104148	-0.338922	0.429896	0.0820117	-0.319457	-0.187352	-0.219455	-0.724645	-0.664637	0.790103	1.25245	-0.0319095	-0.509227	0.779748	1.2286	-0.24153	0.166563	1.25459	0.116595	-0.268207	1.57196	-0.0902614	-0.285313	-0.410413	1.55458
SYAP1	0.623947	0.0382101	0.167673	-0.401017	0.22293	-0.279323	-0.658451	-0.41085	-0.625895	-0.00210547	-0.429474	0.458056	0.537682	-0.477143	0.500177	0.902573	0.0893671	-1.11109	-0.0317327	0.480071	0.413032	1.15504	1.33801	-0.505539	-0.955999	0.710049	0.0643294
SYNCRIP	0.735151	0.0106329	0.0691333	-0.562736	0.172415	-0.650719	-0.919273	-0.852012	-0.830907	0.109507	-0.233012	0.184765	-0.351827	-0.587743	0.325185	-0.00995231	-0.897711	-0.0719741	0.485908	0.683058	0.709208	0.638363	-0.0533549	0.988095	0.763388	-0.946143	0.899381
SYNDIG1	0.924075	0.0178641	0.099014	-0.630439	0.293637	-0.15591	-0.193259	0.164007	-0.159984	-2.0818	-1.35569	-0.238069	-0.684632	0.0224266	-0.254555	1.51884	-0.100161	1.22786	0.954256	1.01757	0.623247	0.694562	0.108705	-0.810817	-0.914963	0.352337	1.18158
SYNE4	1.01696	0.00236776	0.0236324	-0.804006	0.212959	-0.630563	-0.611903	0.0164689	-0.443443	-1.66313	-1.49146	0.575531	-0.204094	-0.359223	0.590481	0.380573	0.0468794	0.335347	0.247047	-0.27438	0.74704	0.424385	1.07193	0.882301	-0.073656	-1.67065	0.687837
SYNGR2	0.622932	0.000411881	0.00651718	-0.454813	0.168119	-0.265158	-0.590744	-0.591771	-0.452214	-0.524199	-0.304789	0.683648	0.202948	-0.44143	0.379397	0.00395814	0.557341	-0.258215	-0.302607	0.198941	0.530952	0.255317	0.00642753	0.560878	-0.32804	0.261744	0.378653
SYNM	1.11162	0.0105363	0.0686811	-0.489012	0.622607	-0.323476	-0.251872	0.0736144	-0.535382	-1.01709	-0.879862	0.524198	3.11938	-0.213945	1.15738	-0.00885812	0.793502	0.970696	0.53667	-0.244577	-0.324955	1.35566	0.474114	-0.483004	-0.231566	2.25907	0.277937
SYT11	0.930291	0.00233394	0.0233803	-0.663574	0.266717	-0.416699	-0.628928	-0.352682	-0.613617	-1.02426	-0.94526	-0.763333	0.516953	0.478953	0.636241	0.428135	-0.646217	0.105153	0.702761	0.231233	-0.0947836	0.457256	1.18546	-0.78382	1.43601	-0.453615	0.831087
SYT13	0.78513	0.00342233	0.0308353	-0.627305	0.157825	-0.227949	-0.766675	-0.307724	-0.394203	-1.04044	-1.02684	0.303794	0.170047	0.623018	-0.0255506	-0.25816	0.148711	0.934174	0.461911	0.513274	-0.956428	-0.0182935	-0.540663	-0.817225	0.4705	0.851127	0.664966
SYTL1	1.11332	0.00312269	0.0289573	-0.784238	0.329083	-0.933921	-0.863513	-1.02204	-0.605709	-1.32146	0.041221	0.160615	1.63209	0.0110019	0.837923	-0.483606	-0.0602138	-0.710376	0.635157	0.177206	1.39902	1.4517	1.34028	-0.398252	-0.58859	0.537044	-0.675674
TACC3	1.94135	1.14284e-05	0.000430831	-1.40002	0.541336	-1.08164	-1.59367	-0.938431	-1.795	-1.46173	-1.52963	0.38324	0.544662	1.68637	-0.38681	-0.426851	0.467727	-0.546172	0.748773	0.755454	2.07341	0.714321	0.896473	0.754332	-0.52711	1.99528	-0.471726
TACSTD2	0.695238	0.000137834	0.00287218	-0.547875	0.147363	-0.665493	-0.789141	-0.0598808	-0.449043	-0.981508	-0.342182	0.231546	0.631527	-0.154753	0.397639	0.423725	0.635719	-0.489389	0.343264	0.172584	-0.0314371	-0.0238053	0.224353	0.331724	-0.191625	-0.0122544	-0.131011
TAF2	0.62072	0.00039998	0.00635965	-0.491455	0.129265	-0.430197	-0.540938	-0.402621	-0.411133	-0.425696	-0.738146	-0.508125	0.246851	-0.387194	0.692516	0.521335	0.628033	0.279198	0.118132	0.12305	-0.0486672	0.359061	-0.0674157	-0.216396	-0.239471	0.371031	0.196294
TAF4B	0.681177	0.00966844	0.0648709	-0.403337	0.27784	-0.463722	-0.154207	-0.305201	-0.355886	-0.337216	-0.803788	0.948213	-0.145622	1.12315	0.82551	0.257377	-0.674142	1.06237	0.240844	0.248655	0.283193	0.29899	-0.835934	0.15358	0.700789	0.475918	-0.517443
TAGLN2	0.609881	0.00660992	0.0498314	-0.458655	0.151226	-0.291211	-0.372338	-0.909436	-0.712884	-0.0986816	-0.367381	-0.302474	1.01211	-0.544501	0.0229438	-0.138051	0.794869	-0.523796	-0.0106934	0.0593042	0.461826	0.760729	0.567967	0.234107	-0.40952	0.322481	0.112316
TARBP1	0.632475	0.0346417	0.157075	-0.284952	0.347523	-0.440835	-0.519496	-0.277182	-0.472744	0.0533326	-0.0527864	-0.342834	0.813984	-0.392937	-0.393996	1.05755	0.907314	-0.807985	0.897932	1.75685	0.219333	0.233973	0.204653	-0.0562598	0.514278	-0.16864	1.11714
TATDN1	1.39433	2.59148e-05	0.000800176	-1.16559	0.228736	-1.54437	-0.989609	-1.8856	-1.49604	-0.800903	-0.277049	-0.595188	0.0614636	-0.675822	0.861369	0.19701	0.0225787	0.8279	0.0326602	-0.0120768	0.289404	1.17103	0.396447	1.09895	-0.219249	0.692143	-0.488835
TBC1D24	0.719744	0.00796001	0.0568296	-0.499019	0.220725	-0.343412	-0.440835	-0.637447	-0.661744	-0.571077	-0.339601	0.640016	0.978198	0.0516458	-0.452882	-0.569867	-0.294064	0.506938	1.02815	0.590016	0.254327	-0.931554	0.271885	-0.145459	0.230494	0.0440158	1.32974
TBC1D31	1.00801	4.16523e-05	0.00116661	-0.760826	0.247184	-0.30239	-0.931554	-0.480333	-0.608241	-1.00709	-1.23534	0.0409026	-0.102057	-0.270268	0.684973	1.01757	-0.0855126	0.933004	-0.140429	0.214444	0.225261	0.299954	-0.362543	0.779277	0.205027	0.729784	-0.214444
TBC1D7	0.78269	0.000184034	0.00356839	-0.524161	0.25853	-0.350954	-0.616019	-0.324703	-0.614514	-0.45056	-0.788214	-0.34178	0.42322	1.0081	0.36633	0.0602189	-0.146268	0.603642	-0.171999	0.266736	0.717742	0.0278751	0.336925	0.606673	0.250149	-0.526329	0.655234
TBCC	0.985582	0.000751624	0.0103722	-0.833897	0.151686	-1.32146	-0.806578	-1.03844	-0.893625	-0.587388	-0.355886	-0.392446	-0.88566	1.93633	0.274023	-0.162746	-0.557391	0.350544	0.191173	0.0756613	0.0796779	0.135688	0.383926	0.461389	0.505292	-0.0643574	0.0958702
TBCCD1	1.00863	0.0028667	0.027261	-0.813737	0.194888	-1.0342	-0.786677	-0.863873	-0.84572	-0.594363	-0.757589	-1.31475	0.0843662	0.106763	2.2447	-0.016583	0.00398255	0.406237	0.56745	0.52983	-0.822854	0.381543	-0.0381143	0.62825	0.562223	-0.421102	0.216265
TCEB1	0.676252	0.00810975	0.057561	-0.513227	0.163025	-0.535557	-0.393906	-0.961993	-0.848455	-0.0894251	-0.250024	-0.400623	-0.784809	0.0987524	1.01914	-0.179748	-0.476756	0.153481	0.15745	0.467158	0.76166	0.680977	0.704397	0.818875	0.123616	-0.631645	0.0964769
TCF19	0.697323	0.00306852	0.0286446	-0.476855	0.220468	-0.00202725	-0.322523	-0.305304	-0.249607	-1.05737	-0.924295	0.514662	0.14759	0.157407	-0.239146	0.0287192	0.711605	0.887374	-0.155207	0.0700539	-0.150163	0.289957	-0.550886	-0.333762	0.478375	1.15947	0.511444
TCTEX1D2	0.933308	0.00446891	0.0376237	-0.601009	0.332299	-1.15298	-0.812713	-0.627275	-0.984081	0.00842016	-0.0374297	0.0657107	1.58442	-0.248323	1.30008	0.676006	-0.71416	0.651887	0.831408	0.654005	-0.246578	-0.290038	0.263263	0.47468	0.727946	0.565817	-0.97935
TDG	0.902367	0.0137945	0.0828612	-0.600202	0.302164	-0.735298	-1.1518	-1.01564	-0.873813	0.30093	-0.12559	0.577346	0.0266673	1.15947	0.0237616	-0.538763	-1.14977	1.2038	0.834777	1.47401	0.488039	-0.718516	-0.0994561	-0.366732	1.50341	-0.0330741	0.44966
TEAD4	0.644422	0.00378667	0.0330906	-0.45496	0.189462	-0.693007	-0.727275	-0.436678	-0.261474	0.0198559	-0.631181	1.02568	0.441205	0.766155	-0.100302	-0.215383	0.147025	-0.518321	0.14928	0.432259	-0.0149648	0.476934	0.2245	-0.327467	-0.0425551	0.965134	-0.377781
TEKT2	0.717393	0.0380124	0.166966	-0.352645	0.364748	-0.673051	-0.477311	-0.364367	-0.355329	-0.419397	0.173584	1.82455	0.163779	1.26536	-0.262715	0.0587699	-0.511309	-0.482105	0.411881	1.26536	-0.0694379	0.691946	0.28772	1.28157	-0.100658	-1.11409	1.12535
TES	0.894025	2.63292e-05	0.000807116	-0.704603	0.189422	-0.509681	-0.657419	-0.371041	-0.726699	-1.16014	-0.802636	0.511858	0.101399	-0.461685	-0.0146871	-0.385679	0.269987	0.0808217	0.204546	0.21871	0.0405262	-0.0418513	-0.00267624	1.04651	0.729784	0.612225	0.120967
TET1	1.15155	0.047715	0.193259	-0.639897	0.511653	-0.860319	-0.756813	-0.595496	-0.454588	-0.892841	-0.279323	-0.577723	0.420367	3.00614	-0.209203	1.24944	-0.651832	1.3033	0.582811	0.155669	0.0549501	-1.97364	0.525851	1.89295	2.92363	-1.62119	1.10493
TFAP2A	0.652819	0.0463224	0.189514	-0.384168	0.268652	-0.0942651	-0.435025	0.101065	-0.271267	-0.884572	-0.720942	0.153983	-0.0520086	0.3929	1.12315	-0.253019	1.25063	-0.600929	-0.0992081	-0.804132	0.6391	-0.796358	-0.0860102	1.97143	0.459037	0.556012	0.443852
TFAP2C	0.70112	0.0446658	0.18554	-0.421999	0.279121	-0.493471	-0.703672	-0.242545	-0.203179	-0.0774355	-0.811694	0.869937	1.38764	-0.405593	0.858098	1.15209	1.20166	0.111949	0.328322	0.489736	-0.381858	-0.291459	0.412925	-0.747703	-1.60334	0.0180219	1.0655
TFPT	0.660851	0.00350914	0.0312531	-0.402077	0.258774	-0.233991	-0.661295	-0.656507	-0.647614	-0.172318	-0.040738	-0.273006	-0.286141	0.12125	0.928787	0.750908	-0.122238	0.300308	0.252723	0.120201	0.722003	1.2038	0.758375	-0.324394	0.116332	0.0766843	-0.205206
THAP10	0.660096	0.00851624	0.0595876	-0.40269	0.257406	-0.776504	-0.166603	-0.27513	-0.551724	-0.340198	-0.305979	0.232839	0.796281	0.242214	-0.466963	0.66799	0.282804	0.0543588	0.692348	0.364284	0.308649	0.30093	-0.305249	-0.653585	-0.0507653	1.7179	-0.065544
THEM6	1.32761	0.000178765	0.0034835	-0.873182	0.454424	-0.707024	-0.659687	-0.832958	-1.1632	-1.00756	-0.868666	-0.168735	1.23516	-0.49995	0.803175	0.211004	1.34707	-0.934963	0.220287	0.869937	1.59999	1.46721	0.808589	0.0565075	-0.144734	0.509929	-0.109698
THEMIS2	0.901532	0.0321509	0.149121	-0.709947	0.191585	0.516195	-1.06288	-0.813972	-0.870068	-0.659446	-1.36951	-1.24281	0.858098	0.00158752	0.992447	0.361034	-1.06429	-0.490432	-0.219455	0.725196	0.392132	1.51016	2.04978	0.0200616	-0.0375797	0.460413	-1.25099
TIGD1	1.31964	0.000188018	0.0036272	-1.04341	0.276225	-1.67464	-1.10857	-0.999059	-1.12802	-0.389704	-0.960471	0.0134187	-0.0513821	1.40999	0.441807	-0.0987221	-0.891539	0.974529	1.22113	-1.22249	0.392819	0.191374	0.587544	0.626383	-0.272696	0.135576	0.961843
TIMELESS	0.802835	0.000615824	0.00891211	-0.671123	0.131712	-0.558749	-0.891822	-0.338136	-0.70599	-0.795662	-0.736379	-0.44807	-0.0479014	1.03545	-0.584901	0.263104	-0.516194	0.487812	0.163419	0.526486	0.505801	-0.103187	-0.11281	-0.263916	0.930142	0.397147	-0.124989
TIMM23	0.597622	0.00152699	0.0171317	-0.4419	0.155722	-0.561014	-0.571077	-0.72352	-0.664637	-0.111625	-0.0195275	0.26595	-0.232354	0.134031	-0.60887	0.152941	-0.00493837	0.0641192	-0.0768929	0.361357	0.374869	0.581348	0.305849	0.956893	0.118894	0.383155	-0.2848
TIMM8B	0.823742	0.000665866	0.009451	-0.611196	0.212546	-0.605004	-0.685685	-0.815589	-0.828588	-0.20794	-0.52437	0.460122	0.412772	0.729784	0.651217	-0.254786	-0.952497	-0.166346	0.223459	0.369547	0.743623	0.561322	0.697346	0.633094	-0.337134	0.0116655	-0.38245
TIMMDC1	0.598267	0.0410213	0.175696	-0.636365	-0.0380983	-0.726419	-0.925566	-1.38734	-1.00195	0.133862	0.0892159	-0.346992	-0.805955	-0.920729	0.878516	-0.97587	0.301084	0.124199	-0.0140671	0.504367	0.137029	0.720067	0.394024	-0.853403	0.017564	-0.262958	0.493551
TJP3	0.884349	0.0104749	0.0683976	-0.440062	0.444287	-0.368997	-0.574174	-0.31413	-0.595188	-0.564295	-0.223589	0.791955	-0.0705246	-0.548464	0.46587	0.30648	-0.43856	-0.488066	0.0228332	0.954738	2.39954	0.639308	0.958739	0.791457	-0.591771	0.57793	1.33713
TK1	1.59057	2.52134e-05	0.000783809	-1.07764	0.512924	-1.05183	-1.32919	-0.76208	-1.01227	-1.04748	-1.26299	-0.320911	0.477697	0.668677	1.08959	0.171287	-0.0304197	-0.119212	-0.0987854	0.887374	1.16316	1.64655	-0.111986	1.19692	0.378474	1.95586	-0.7475
TLCD1	1.55151	0.000256678	0.00461697	-1.07324	0.478265	-1.20923	-0.908461	-0.747171	-0.820818	-1.29602	-1.45775	-0.402711	1.24654	0.247118	1.15129	0.181953	-0.382897	-0.378632	-0.926964	0.402841	2.72869	0.85233	0.700527	1.39114	0.0113995	0.875318	-0.0457012
TM4SF18	0.739688	0.0078063	0.0560335	-0.307696	0.431992	-0.169828	-0.215244	0.0389111	-0.0269992	-0.794636	-0.678379	-0.0445009	0.0226118	-0.00729158	-0.275532	0.00378553	1.23448	-0.119672	0.912605	0.322109	0.248194	1.24263	1.71584	0.0534508	0.270804	1.13876	0.193605
TM7SF2	1.12721	0.00892018	0.0614	-0.655238	0.471973	-0.864908	-1.20197	-1.11172	-0.734008	-0.0403835	0.0215629	-0.498534	-0.212807	1.06622	2.15829	-0.888949	-0.240417	0.63466	0.14922	0.43923	2.18652	0.645871	1.0289	1.50712	0.58316	-0.978255	-0.0286603
TMA7	0.846258	0.00403048	0.0347596	-0.88975	-0.0434915	-1.44723	-1.11172	-1.59718	-1.36828	0.070408	0.11551	-0.0937578	0.414665	0.204494	0.0959145	-0.632184	-0.304275	0.339122	0.188283	0.283381	0.322837	0.402451	0.366002	-0.375664	-0.457335	-0.0348995	-1.4149
TMC4	1.54184	0.000595925	0.0086901	-1.47562	0.0662181	-2.59456	-2.19663	-1.37915	-1.04687	-1.30992	-0.326598	0.235123	-1.39806	-1.20197	1.17557	0.0853473	0.794164	-0.969693	0.156999	0.038889	0.338435	1.2286	0.628033	-0.0125649	-0.0467951	-1.21266	1.22007
TMCO6	0.593958	0.0442852	0.184327	-0.39394	0.200018	-0.525073	-0.699073	-0.704161	-0.496152	0.00113808	0.0596811	-0.800049	-0.641143	0.0817655	0.764112	-0.353579	-0.12859	0.889044	0.940747	0.195674	0.701462	0.79119	1.2152	-0.587032	0.69485	-0.760972	0.197607
TMEM125	1.10761	0.000250605	0.00452909	-0.838806	0.268805	-1.30522	-1.13364	-0.626078	-0.81198	-1.06211	-0.0938135	-0.0053669	1.06237	-0.516955	0.822991	0.159519	0.312909	-0.794931	0.337644	1.0081	0.266657	0.411181	-0.0188395	0.745666	-0.340775	-0.350954	1.20166
TMEM129	0.598819	0.0199133	0.107204	-0.495769	0.10305	-0.773757	-0.657755	-0.598457	-0.723705	-0.159338	-0.0616023	0.598568	0.348692	-0.0533883	-0.0810474	-0.817915	0.487588	0.437947	0.50841	-0.31413	1.32572	0.149584	0.281391	-0.227896	-0.991439	0.375422	-0.378703
TMEM139	2.29446	1.24259e-07	1.23792e-05	-2.22268	0.071782	-1.98126	-2.13081	-2.31781	-2.1006	-2.62191	-2.1837	0.525405	1.00274	-1.29928	-1.01934	-0.707151	0.772817	-1.38965	0.4563	0.437648	0.0142643	0.390724	0.367839	0.346182	0.424285	0.876074	-0.0503402
TMEM147	0.858429	0.0241715	0.122463	-0.554693	0.303736	-1.01709	-0.825458	-0.90641	-0.877919	0.0830858	0.215632	-0.42863	-1.20923	0.0604074	0.493414	-0.200078	-0.307196	0.483955	0.595993	-0.0458979	2.55646	1.22007	1.02939	0.186242	-0.175015	0.70322	-0.103336
TMEM185B	0.607311	4.49544e-05	0.00123773	-0.482496	0.124815	-0.539517	-0.317835	-0.474547	-0.337359	-0.483469	-0.742248	-0.101185	-0.252944	0.0624716	0.304039	0.0330177	-0.158606	0.543876	0.227848	0.29477	0.0519918	0.127457	0.0227695	0.000166728	0.746594	-0.168236	0.263016
TMEM251	0.750917	0.0162703	0.0927875	-0.367128	0.38379	-0.0440076	-0.416285	-0.780887	-0.876732	-0.00384504	-0.0810089	-0.23435	-1.04619	-0.0911504	-0.507695	0.0104633	0.559747	1.40053	0.227791	1.29588	1.07426	0.564245	0.609888	1.29785	-0.157155	0.40804	0.728468
TMEM33	0.606264	0.00275671	0.0265126	-0.375552	0.230711	-0.290038	-0.716853	-0.627921	-0.512639	0.0865166	-0.192381	0.179782	0.0904485	0.355966	-0.374346	-0.179489	0.312727	0.0716594	-0.186488	0.284458	1.07262	-0.125477	0.249742	0.579499	-0.186833	0.685736	0.861369
TMEM38A	0.828052	0.0143417	0.0850541	-0.518879	0.309174	-0.465108	-0.363643	-0.403696	-0.452662	-0.782563	-0.6456	-0.563448	-0.453252	0.85078	1.11369	-0.485125	0.0849252	0.478599	0.391682	2.48827	0.281723	0.137595	0.561881	-0.772646	-0.105751	0.665711	0.272144
TMEM41A	0.640608	0.000837571	0.0111676	-0.470109	0.170499	-0.847305	-0.579678	-0.531991	-0.460629	-0.247702	-0.15335	0.26138	-0.200891	-0.528509	0.856657	-0.0845751	0.374539	0.561586	0.408413	0.67483	-0.0365699	0.270631	0.0324755	0.0782922	0.462644	-0.02799	-0.374926
TMEM45B	1.06676	0.010624	0.0690951	-0.40307	0.66369	-0.169098	-0.467689	0.107925	-0.303214	-1.13545	-0.450897	1.21258	0.509757	-0.202232	-0.299929	-0.374281	1.66397	0.147073	0.482702	-0.220895	1.78929	1.68637	2.36929	-0.42819	-0.167987	0.68167	1.76985
TMEM61	0.707196	0.0106787	0.0693919	-0.465955	0.241241	-0.35972	-0.499852	-0.186527	-0.43427	-0.719149	-0.59621	-0.00588793	0.426218	0.0919377	-0.577158	0.86513	0.804396	0.110654	0.122238	0.371031	-0.0162518	0.246237	1.12384	-0.563031	-0.730216	-0.041375	1.63209
TMEM65	1.07484	0.000854407	0.0113261	-0.73495	0.339886	-0.607653	-1.01934	-0.76147	-0.663805	-0.497108	-0.860319	-0.687064	1.18924	-0.306252	0.709453	-0.170385	0.40267	0.57288	0.197926	0.236787	0.285762	0.557849	-0.168785	1.88995	-0.00336086	1.32974	-0.598236
TMEM68	0.973548	6.48998e-06	0.000279237	-0.714031	0.259517	-0.939864	-0.84572	-0.967461	-0.837518	-0.191075	-0.502547	0.166563	-0.16947	0.0386876	0.025284	-0.240062	-0.462341	0.676249	0.458574	0.640898	0.464331	0.120452	0.637854	0.00311531	0.649285	0.538658	0.60419
TMEM69	0.802953	0.000953762	0.0122252	-0.624776	0.178178	-0.9088	-0.681983	-0.798678	-0.995811	-0.0986104	-0.26477	-0.573748	-0.0428452	0.200318	0.411489	-0.513339	0.0176437	0.589507	0.381372	0.76469	0.0553284	0.582954	0.114794	0.45003	-0.198073	-0.523132	1.13386
TMEM79	0.666666	0.0103246	0.0677064	-0.388014	0.278653	-0.216795	-0.483606	-0.378703	-0.477846	-0.501012	-0.270119	0.212794	0.120412	0.690824	0.772817	1.70026	1.0224	-0.00655878	-0.10748	-0.738996	-0.151023	-0.00210547	-0.481876	0.087751	0.539856	0.23531	0.564054
TMPO	0.660642	0.000893639	0.0117508	-0.470791	0.189851	-0.595015	-0.586522	-0.482745	-0.545201	-0.385085	-0.230176	-0.312824	-0.163654	0.503764	-0.257335	-0.343412	-0.115421	0.50568	0.325036	0.486093	0.340152	-0.0496204	0.209524	-0.194237	1.13729	0.330859	0.635719
TMPO-AS1	0.607176	0.0066764	0.0501497	-0.369944	0.237233	-0.219017	-0.512639	-0.273473	-0.073656	-0.397936	-0.742941	-0.340378	0.92445	1.48975	0.266348	0.564827	-0.189909	-0.294064	0.0857699	0.565681	0.0649979	-0.261364	0.428245	-0.153892	0.276685	0.262968	0.105609
TMPRSS3	1.06877	0.0197017	0.106441	-0.78629	0.282484	-1.08107	-1.03642	-0.721308	-0.918668	-0.873813	-0.0864606	1.11244	1.48975	-1.35945	-0.705148	0.486946	0.120764	-1.08243	0.658906	1.03421	1.08374	0.326182	0.577577	1.11369	-0.045828	-1.98875	1.69713
TMPRSS4	1.65787	0.00437107	0.036986	-0.939006	0.718864	-0.642506	-0.614669	-0.0403001	-0.418051	-1.86597	-2.05253	0.524782	1.25063	-0.130929	2.38987	0.0628048	-0.289634	-1.10176	-0.361678	-0.0914869	2.3608	0.221197	1.97143	3.59632	0.280028	0.658693	0.160758
TMTC1	1.76118	0.000277446	0.00489811	-1.29339	0.467786	-1.12645	-1.19003	-1.03789	-1.45498	-1.49604	-1.45498	-0.22872	1.47043	-0.054579	1.68637	-0.0587512	1.26903	1.06296	1.72996	1.76985	1.03368	-1.04687	0.14386	-0.0554016	0.556425	-1.84143	0.0477675
TMTC4	0.62103	0.0196633	0.106335	-0.387536	0.233494	-0.603359	-0.459058	-0.410175	-0.477719	-0.240095	-0.13481	-0.927711	-0.1909	0.994249	1.46153	-0.0591805	0.724694	0.399445	0.121469	0.41721	0.134806	-0.0399407	0.429121	0.463771	0.777668	-0.765388	-0.204933
TNFAIP2	0.599589	0.0346142	0.156982	-0.432418	0.167172	0.00976545	-0.512053	-0.208654	-0.385679	-0.808375	-0.68951	0.886603	1.40481	-0.0189597	0.049377	-0.262958	1.28281	0.313303	-0.847688	0.690353	0.296843	-0.0777177	-0.887533	0.0276751	0.0513639	-0.358431	0.124902
TNFAIP6	0.83734	0.0258991	0.128151	-0.346664	0.490676	0.00623329	-0.561307	-0.166245	-0.234855	-0.45693	-0.666881	-0.619825	0.688396	-0.225806	1.89787	1.2781	2.04685	0.492366	-0.598236	0.447899	0.683856	0.921685	-0.235017	0.108914	-0.429588	1.66397	-0.270615
TNFAIP8L1	1.12448	7.58728e-06	0.000312225	-0.956048	0.168428	-0.819937	-0.878822	-0.884088	-0.891822	-1.71994	-0.541675	0.224202	-0.311583	-0.0833248	-0.0331492	-0.411376	0.773161	-0.515562	0.0697987	0.349796	0.679498	0.230893	-0.0100533	0.637624	0.831408	0.4705	-0.206979
TNFRSF12A	0.9881	0.0126083	0.0779884	-0.59637	0.39173	-1.19855	-0.906037	-0.408701	-0.176525	0.0779943	-0.966399	0.934174	2.21752	1.31705	-0.58235	-0.581639	-0.0639003	0.0828933	0.173165	1.03677	0.315891	-0.579678	1.00222	-0.472504	-0.639297	1.58854	0.518827
TNIP2	0.635988	0.00332664	0.0302638	-0.524949	0.111039	-0.584341	-0.688753	-0.814686	-0.688753	-0.200486	-0.172676	-0.0915459	0.0718679	0.260233	0.517454	-0.671507	0.275138	-0.44807	0.0946401	0.25079	0.562039	0.227518	0.190204	0.750663	-0.617957	0.801828	-0.396676
TNNI3	0.815667	0.00224026	0.0227506	-0.563683	0.251984	-0.629248	-0.0755801	-0.587984	-0.655766	-0.577563	-0.855958	0.980202	0.0742688	0.06324	0.911169	1.08219	-0.481876	0.368857	0.0699092	-0.499001	0.924922	0.765347	0.0834337	-0.34685	0.749694	-0.267335	-0.446419
TNNT1	2.13236	0.000259988	0.00466185	-1.67606	0.456303	-1.43859	-1.24926	-1.78934	-1.03198	-2.43621	-2.11099	0.946793	-0.0481548	-0.523796	2.43096	1.23045	0.423551	0.469897	1.04707	-2.83635	0.902975	1.44362	1.02299	-0.296739	1.80082	0.014363	-0.727612
TOMM5	0.854111	0.00111375	0.0136709	-0.706115	0.147996	-1.30232	-0.862501	-0.973917	-1.00437	-0.0489861	-0.0445958	0.423996	0.270288	0.0269201	-0.488581	-0.344928	-0.415416	0.670276	0.0348468	0.364211	0.829063	1.23265	0.0304816	-0.0157455	-0.489647	0.273054	-0.0335362
TOP1	0.76645	0.0123462	0.076784	-0.705894	0.0605558	-1.20387	-1.36213	-0.924295	-0.840783	0.110819	-0.0150998	0.0521462	-0.498704	0.831744	-1.3389	-0.867241	-0.237891	0.618843	0.583365	0.485352	0.311768	-0.50842	0.463127	-0.111591	0.719001	0.00160591	0.464691
TOP1MT	0.589947	0.000204213	0.00385193	-0.412605	0.177342	-0.459984	-0.507251	-0.480179	-0.567428	-0.198392	-0.262398	0.812168	-0.279515	-0.134605	0.647746	0.17574	0.0312145	0.37397	0.166354	0.38418	0.131569	0.416415	0.190827	-0.088387	0.304278	-0.119389	-0.175095
TOP2A	2.02895	2.98966e-07	2.39172e-05	-1.74011	0.288834	-1.00148	-2.04298	-1.08623	-2.21093	-1.73067	-2.36839	-0.689908	0.353439	1.39609	-0.0388651	-0.413007	-0.775175	0.417763	0.427951	0.42545	1.26128	0.443478	-0.00303296	0.614675	0.997329	0.53891	-0.335039
TOPBP1	1.00815	0.000280534	0.0049336	-0.865533	0.142617	-1.14398	-1.482	-0.871951	-1.01934	0.0114553	-0.687376	-0.620468	-0.460067	0.0936138	-0.328798	-0.160642	0.649511	0.630884	0.4996	0.885231	0.04285	0.568127	0.0182554	-0.824868	0.647746	0.486597	0.154299
TPD52	1.09957	0.00126943	0.0149714	-0.891238	0.208333	-1.38059	-0.962901	-1.15298	-0.934493	-0.316344	-0.600126	-0.15145	-0.887533	-0.537041	1.23265	0.695197	-0.295976	0.206895	0.407964	0.312573	0.660097	1.0289	0.541881	0.686782	1.00556	-1.33509	-0.238069
TPD52L2	0.994051	0.000596794	0.00869722	-0.657676	0.336375	-0.449539	-1.0105	-1.32603	-1.07662	-0.0418513	-0.0415227	0.170106	-0.466741	0.414095	-0.119847	-0.167394	-0.163222	-0.147036	0.231817	1.09946	1.54281	0.531356	1.01326	0.256163	0.454759	0.676523	0.0558828
TPI1	1.0524	1.23598e-05	0.000454651	-0.779457	0.272941	-0.740844	-0.977114	-0.893625	-1.10717	-0.448455	-0.509531	0.814962	0.996575	-0.122067	0.265883	-0.775175	-0.137847	-0.0200022	-0.200078	0.671037	0.282669	0.528875	0.385583	0.476819	0.480071	0.17053	0.549214
TPM4	0.956918	0.00019453	0.00370903	-0.64756	0.309357	-0.569446	-0.715544	-0.891539	-0.741274	-0.393097	-0.574463	-0.128404	1.19621	-0.3892	0.380162	-0.429986	0.697686	0.880581	0.231918	0.489582	0.125697	0.0397524	0.696686	0.690353	0.0983513	-0.590744	0.961073
TPRKB	0.964043	0.00136027	0.0157016	-0.48423	0.479813	-1.02004	-0.322825	-0.549098	-0.718252	-0.296218	0.00105097	-0.0220391	0.277577	1.6178	0.187828	0.00202183	-0.267177	-0.288085	0.955894	1.32133	1.32661	1.05173	0.644925	0.677489	0.57665	-0.0639901	-0.321553
TPX2	2.03099	5.25269e-06	0.000240363	-1.75508	0.27591	-1.42446	-1.89442	-0.667101	-1.83121	-2.09136	-2.62191	-0.627275	-0.304071	1.57827	-0.0788225	0.150738	-0.852477	0.320837	0.107394	0.512217	2.09387	0.386924	0.220892	-0.00672979	0.550249	1.04248	-0.679943
TRAIP	0.600541	0.00112007	0.0137185	-0.486759	0.113782	-0.472264	-0.563319	-0.46857	-0.400866	-0.599553	-0.415984	-0.0443129	0.146861	0.486687	-0.46993	0.1814	-0.437505	0.203267	0.0117206	0.18794	0.385752	0.330702	0.463863	-0.180473	0.402451	0.790884	-0.638801
TRAPPC3	0.809333	0.00274152	0.0264579	-0.547562	0.261772	-0.514132	-0.765388	-0.90967	-0.709226	-0.268106	-0.118849	0.185462	1.10779	-0.0938574	0.487588	0.24779	-0.131158	-0.843659	-0.26522	1.08135	0.184648	0.28519	0.209302	1.09285	-0.121312	-0.30465	1.06622
TRIAP1	0.940353	0.00330346	0.0301008	-0.637262	0.303091	-0.561779	-0.840433	-1.00195	-0.861862	-0.331007	-0.226543	-0.312192	-0.314792	0.592755	-0.641725	1.33353	-1.05116	0.650959	0.173074	1.60735	0.717237	0.243629	-0.0438482	0.01957	0.701003	0.235546	0.938509
TRIM24	0.929758	0.00200406	0.0210238	-0.690191	0.239567	-0.902823	-0.536115	-0.674563	-1.02141	-0.80561	-0.200629	0.69485	1.32974	0.0669927	-0.850365	-0.388942	1.52251	0.30638	0.64049	0.922437	0.0817248	-0.27384	0.337644	-0.233868	-0.438127	0.191988	-0.0765413
TRIM28	1.00763	0.0237971	0.12121	-0.618363	0.389268	-1.41122	-0.899344	-0.982938	-1.05595	0.135963	0.503308	-1.11024	-0.963449	-0.0239483	1.82135	-0.393594	-0.0696553	-0.0743565	1.46558	0.62711	1.74802	0.763732	1.45947	-0.206122	1.46383	0.281583	-0.561014
TRIM47	0.741775	0.0132229	0.0806989	-0.233233	0.508543	-0.265869	-0.188607	-0.0308996	-0.230956	-0.249801	-0.433264	1.19159	1.39114	-0.466894	1.39731	-0.178761	0.805904	0.0106473	0.24164	0.00685302	1.05847	1.19529	0.297699	0.469262	-0.506987	1.39902	-0.175498
TRIM59	1.37676	0.00919875	0.0626445	-1.14904	0.227718	-2.03562	-1.05737	-1.47395	-1.04171	-0.295402	-0.990197	-0.905274	0.209302	-0.227996	1.08219	-0.771783	0.420367	0.61334	1.6178	0.271105	0.88152	1.81829	0.52106	0.98891	-3.1631	0.816522	-0.528761
TRIP13	2.97126	1.33474e-08	2.12076e-06	-2.72581	0.245452	-2.52543	-2.69221	-2.83635	-2.77232	-2.69221	-2.83635	-0.89571	0.324531	-0.0264897	-0.77731	0.240123	-1.74226	0.56783	0.527799	1.38631	0.818441	1.11004	0.473035	0.929325	-0.087679	1.50121	-0.421963
TRIT1	0.643415	0.0154879	0.089576	-0.529585	0.113831	-0.98464	-0.807515	-0.558749	-0.749059	0.0263353	-0.10388	-0.108328	0.0885688	0.0258109	0.417926	-0.195568	-0.87589	0.0654868	0.626487	0.808145	0.00983207	0.371908	0.111662	0.61826	-0.188666	-1.09718	1.14284
TRMT10C	0.885239	0.00190583	0.0202816	-0.84096	0.0442787	-1.18306	-0.988815	-1.2712	-0.702513	-0.237416	-0.662747	-0.774829	-1.4082	0.178032	0.382063	0.434695	-0.394282	-0.236107	0.238317	0.788925	0.149357	0.659231	0.409182	-0.731776	0.403271	0.246199	0.364381
TRMT12	1.39495	1.23188e-05	0.000453871	-1.07651	0.318439	-0.982938	-1.00909	-1.39422	-1.40013	-0.883294	-0.789387	-0.15605	0.393957	-0.334248	1.56436	1.04947	-0.537949	0.575676	-0.193363	0.0716972	0.287036	0.991996	0.23928	0.773711	-0.66618	0.728737	0.306886
TRMT61B	0.767083	0.00904705	0.0619668	-0.455758	0.311326	-1.11897	-0.402919	-0.920729	-0.593954	0.278881	0.0231488	-0.249961	0.620657	-0.492127	0.733575	-0.759233	0.369966	-0.116997	0.792616	1.16928	0.382134	1.01849	0.461619	-0.0496496	1.28381	-0.010299	-0.172676
TRUB2	0.694987	0.00220311	0.0225233	-0.499303	0.195684	-0.832526	-0.758862	-0.592449	-0.951975	0.0111142	0.128881	0.815752	-0.261987	-0.0791422	-0.131197	-0.590372	-0.251483	0.589882	-0.0154796	0.834552	0.370027	0.83693	0.264103	0.351473	0.128159	0.00372737	0.266002
TSPAN12	1.52329	0.00212026	0.0218609	-1.09456	0.42873	-0.996554	-1.75771	-0.447799	-0.953118	-1.24506	-1.16712	-0.0587154	1.27725	-0.661509	-0.0844148	-0.0653047	1.46721	0.894025	0.0024647	0.66774	-0.187455	-0.0170896	0.644322	3.77456	0.0440634	0.0709892	-0.908461
TSPAN14	0.598414	0.000939207	0.0121182	-0.324065	0.274349	-0.0420357	-0.397069	-0.26244	-0.329597	-0.589504	-0.323743	0.510288	0.0202582	0.177434	0.811292	-0.157284	0.932552	0.254283	0.0226379	0.125896	0.243052	-0.128309	0.0104321	0.486597	0.265578	-0.139382	0.954256
TSPAN15	1.32211	8.32228e-05	0.00197116	-0.953784	0.368328	-1.12001	-0.951478	-0.645842	-0.880756	-0.840433	-1.28418	-0.587743	0.212028	-0.229509	1.65126	0.881847	1.26041	-0.197335	0.0952672	0.613908	0.375333	0.967827	0.395859	0.73215	-0.77731	0.890593	-0.391341
[truncated: 129 more rows]

## Sheet: down_HGSOC_vs_normal
#log2FC <= -0.585 #p-value cut-off <= 0.05 #q-value cut-off <= 1.00 #Condition pair: down_HGSOC_vs_normal
[truncated: 1,622 more rows]
