# Supplementary material for: The Expression and Role Analysis of Methylation-Regulated Differentially Expressed Gene UBE2C in Pan-Cancer, Especially for HGSOC
Source: Cancers (Basel). 2022 Jun 25;14(13):3121. doi: 10.3390/cancers14133121 (PMC9264902; doi:10.3390/cancers14133121)
Supplement: Supplementary file 1 [file cancers-14-03121-s001.zip › Table S5. The DEGs in the GSE27651 dataset.xlsx]

## Sheet: up_HGSOC_vs_normal
#log2FC >= 0.585 #p-value cut-off <= 0.05 #q-value cut-off <= 1.00 #Condition pair: up_HGSOC_vs_normal
Group.1	log2FC	p_value	q_value	HGSOC	normal	GSM371112	GSM371113	GSM371141	GSM371142	GSM371143	GSM371144	GSM371145	GSM371146	GSM371642	GSM371643	GSM371645	GSM371647	GSM371648	GSM371649	GSM371651	GSM371653	GSM371654	GSM371655	GSM371656	GSM372253	GSM372255	GSM372258	GSM372259	GSM372260	GSM372261	GSM372262	GSM372263	GSM372264
AACS	1.06504	0.00173513	0.0110461	8.17842	7.11339	8.96827	8.79442	8.0322	8.81604	8.7105	7.8825	8.01309	7.34288	6.73203	7.32988	7.93816	9.09921	9.09201	8.62762	6.66645	8.53674	7.96849	8.41886	8.4238	7.67901	8.85885	6.51459	6.91761	6.43883	7.19119	7.94923	7.66887	7.99425
AADACP1	1.15186	0.0180345	0.0558741	5.11503	3.96317	4.72752	3.91015	7.74909	4.10223	5.67892	4.28488	5.2071	4.10251	4.55957	3.84745	5.53457	6.24768	6.47303	6.34608	4.49794	5.71592	4.52443	4.14935	5.43016	7.23063	3.50211	3.71834	4.38152	3.84298	3.53988	4.16203	4.13426	4.70933
AAMP	1.18959	4.65168e-07	2.15446e-05	8.70111	7.51152	8.61549	9.13602	8.34881	8.58309	8.73348	8.00416	8.6977	8.22599	8.51595	7.9864	8.8373	8.79658	9.30128	9.3298	8.93106	8.85979	8.92636	8.65212	8.95883	8.76298	9.05161	7.40935	7.55405	6.95999	7.04068	7.90702	8.19806	8.16973
AASDHPPT	0.803347	0.00791704	0.0321687	8.84341	8.04006	9.08164	9.80916	8.29712	8.80248	8.80604	8.04802	8.93908	8.16351	8.35433	7.97038	9.24557	9.71167	9.63304	9.18841	8.4126	8.8505	8.71672	8.25284	8.46123	9.02185	9.04977	7.90088	7.95729	6.94713	7.42951	9.34517	8.66038	9.739
ABCA17P	1.08975	0.0265932	0.0732633	5.97512	4.88538	6.621	7.7881	7.32954	5.89822	4.11681	6.40098	5.32253	6.22585	5.22346	4.4921	3.90538	6.14483	7.15426	7.18054	4.34064	5.73656	5.02611	5.80092	5.69862	7.30404	6.62279	4.64506	4.80808	4.03878	4.45287	5.5878	5.77968	7.1195
ABCB10	1.33209	0.000409123	0.00381915	7.94463	6.61254	8.06867	8.06513	7.56956	7.81117	6.87627	8.36131	8.60074	6.24191	6.73534	6.90187	8.23414	8.34421	8.6377	8.61311	7.10952	8.25444	7.54933	8.60433	8.1705	9.26501	8.34259	6.28479	6.11314	6.10135	6.1979	7.80533	7.1727	8.42494
ABCC4	1.175	0.00338716	0.0178608	7.47793	6.30293	7.51287	9.82958	8.59083	7.27038	6.61527	6.84494	7.59247	7.39827	7.44283	6.21076	7.33895	7.5689	8.04595	7.85308	5.78912	7.85664	6.83505	6.50035	7.32228	7.08679	8.20954	5.8652	6.0306	6.03161	6.13818	6.80687	6.94512	8.79967
ABCD3	1.34814	4.65927e-05	0.000740307	9.4029	8.05476	9.98189	9.16726	8.60567	8.9447	8.18595	8.56705	9.31708	9.31945	9.5815	9.10984	9.43996	9.99768	9.84332	9.63712	9.55238	10.5503	8.65598	9.55959	9.54482	9.78294	9.81251	7.49158	7.64912	7.31407	7.52389	9.21041	9.13947	9.70683
ABCE1	1.07022	3.33376e-05	0.000569156	9.12844	8.05821	9.12461	8.59267	8.86926	9.0811	9.15079	8.66992	10.0421	8.84514	8.83067	8.78712	9.05429	9.49607	9.84902	9.31587	9.17028	9.58416	8.42158	10.0298	8.83017	9.11505	9.35167	7.52751	7.86379	7.86379	7.58487	9.02633	8.48298	8.61428
ABCF3	1.16188	1.5707e-05	0.000316352	7.57937	6.41749	7.33867	8.14428	7.7093	8.03621	6.61438	6.77123	7.1367	6.55128	7.75003	7.63924	8.20983	7.95982	7.91741	7.38475	7.7687	8.10792	7.93933	7.32834	7.27741	8.08723	7.40303	6.14871	6.15389	5.89048	6.18759	6.97327	7.15102	7.67103
ABCG1	0.822687	0.0288065	0.0774857	7.03151	6.20883	6.68293	7.04394	6.53721	6.50607	7.75062	6.50141	6.92153	6.40127	6.42625	6.19868	8.08571	7.24529	6.3283	9.10536	6.47321	7.38255	5.86879	7.21135	6.34431	7.28375	8.73916	7.33718	6.58388	5.53534	5.93785	5.55055	6.30815	7.65566
ABHD11	0.82332	0.0010836	0.00785578	8.05088	7.22756	8.06104	7.13123	7.79804	7.87774	8.22134	9.40646	8.48617	7.76161	8.28543	8.04651	7.60338	8.38841	7.74829	9.0091	7.85731	8.35199	7.37373	7.58827	7.95289	8.51944	7.85573	7.05823	7.37373	7.75421	7.64939	6.7401	6.78968	7.79519
ABHD12	1.28822	0.000139497	0.00170314	7.96447	6.67625	7.66773	8.12518	7.86637	8.12147	6.48259	6.76578	8.13633	7.44373	7.51491	8.88258	8.59083	8.86324	8.0009	8.7252	7.15897	8.0699	7.9251	8.12075	6.92607	8.61464	8.94917	6.84777	6.24476	6.54207	6.14591	6.86418	7.41283	8.26698
ABHD14A	0.651315	0.0231866	0.0665633	7.84796	7.19665	8.32689	8.5094	7.87426	8.14008	7.71635	7.55318	8.46824	8.11726	8.28083	7.10716	7.78092	7.14358	8.24567	9.25699	6.81038	8.08679	7.10177	6.96719	7.05202	7.65286	8.41987	6.85773	7.05708	6.98392	6.70307	7.44038	8.13771	8.04351
ABHD14A-ACY1	1.15889	0.0011429	0.008159	8.16777	7.00888	8.87342	8.74681	8.98349	8.17175	8.50565	7.85731	8.92587	6.81357	8.47629	7.40901	7.71544	8.49082	9.63712	9.18392	7.32834	8.57461	7.0948	7.33139	7.22525	8.06024	8.87342	6.86584	6.95392	7.0074	6.51345	7.20949	7.50318	7.41242
ABHD16A	1.46061	2.27665e-05	0.000421439	9.53916	8.07855	9.78173	9.14575	9.14157	10.4953	9.92964	9.10026	9.97864	8.96036	9.34831	9.53482	10.0263	8.69334	9.57038	9.65174	9.62996	10.5515	10.12	8.94618	8.74478	9.55502	9.71233	7.73577	7.73095	6.99619	7.34249	9.01607	9.64983	9.24359
AC004941.5	0.874653	0.00554737	0.0251692	8.50757	7.63291	8.90503	7.87774	8.46513	8.62352	9.37679	8.13066	8.32229	8.23175	7.84987	7.74166	9.69648	8.56939	8.7602	8.70879	8.76497	7.47137	9.21962	7.43559	8.85357	8.43223	9.16756	7.63386	7.36802	6.81743	6.70177	8.58808	8.68832	8.56227
AC018755.16	0.714499	0.00166959	0.0107244	6.93047	6.21597	7.58935	7.21312	6.94661	6.76103	6.73511	6.26225	7.35659	6.34977	6.53879	6.55134	6.9959	6.90905	7.81553	7.48917	6.08304	7.37607	6.54527	6.85003	6.42625	7.21119	7.25028	6.20532	6.07117	6.00121	5.67747	6.59611	6.74453	7.21458
AC091133.1	0.59389	0.0190761	0.0580322	7.54224	6.94835	7.41242	7.69574	7.88398	7.36846	8.56581	7.57381	7.92753	6.3357	8.25997	7.18827	6.79041	7.73625	7.06086	7.66819	7.84432	7.03744	8.12893	6.89728	7.22892	7.47814	7.65207	6.5757	7.08769	6.42156	6.51513	7.54238	7.54764	8.1948
ACAD9	0.734882	0.00519889	0.0240499	9.37504	8.64016	10.1096	9.07766	9.42867	8.65537	9.15929	9.70552	9.48132	9.16082	10.1818	9.94825	8.75048	10.3673	9.79423	9.39965	8.39589	8.8373	9.56599	8.59412	9.35346	10.2666	8.78426	8.48268	8.50565	8.35743	8.342	8.96718	9.18603	9.23342
ACAP2	1.00293	0.00160546	0.0104295	8.71457	7.71164	8.56132	8.52227	8.24256	9.23164	7.80334	8.19245	8.25779	7.79696	9.66408	7.53655	9.45251	9.18392	9.43765	8.75862	8.2898	8.52496	9.08648	8.49714	8.71771	9.75266	8.50817	7.93555	7.51491	7.03023	7.00032	8.53501	8.25385	9.70205
ACBD3	0.990227	5.63727e-05	0.000862747	9.49197	8.50174	9.20138	9.48903	9.05028	9.56857	9.80835	9.90356	9.7835	8.55737	9.5061	8.83446	9.58047	10.0271	9.47495	9.26696	9.51432	9.73617	9.54797	9.1959	10.2035	10.1362	9.4262	8.4075	8.23381	7.75804	8.11225	9.36747	9.13138	9.011
ACBD5	0.85866	0.00178641	0.0112629	8.08342	7.22476	8.12589	7.67015	7.79363	8.49443	7.69249	8.06903	8.53321	7.16626	7.34651	8.23646	7.79189	8.31539	9.09284	8.30396	8.40438	8.37889	7.17031	7.66459	7.65591	8.5167	8.96614	7.44928	6.89622	6.42964	6.68777	8.02833	7.85731	8.44618
ACER3	0.632413	0.00517947	0.0240086	6.96977	6.33735	6.76359	7.08637	6.66474	6.91519	6.27522	6.70759	7.22292	6.6401	6.75538	6.94951	8.17245	7.06325	7.11217	7.34497	6.3195	6.99953	6.76859	7.43655	6.11314	7.0462	7.31571	6.5322	5.96067	5.96193	6.0074	7.00176	6.56015	7.66216
ACLY	0.811699	0.000545618	0.00472332	9.00361	8.19191	9.1355	8.51791	9.06255	9.50538	8.8396	8.527	8.57092	9.07799	9.17618	8.51133	9.63073	8.64151	8.71842	8.87279	9.94908	8.43926	9.59743	9.3081	9.56374	8.8771	9.29685	8.20691	7.94021	7.56745	8.04199	8.68101	8.71388	8.25997
ACN9	1.91632	7.21714e-08	5.20909e-06	8.08296	6.16664	8.18934	8.25885	8.04633	8.38702	6.60007	7.76142	8.18806	7.66459	6.86114	7.86283	8.37998	7.7045	8.9844	8.66902	8.54576	8.78845	7.59097	8.63167	7.4545	8.10792	8.88348	5.62271	6.28317	5.70574	5.828	6.76556	6.79466	8.26473
ACO2	0.67006	0.00978795	0.0371575	8.34822	7.67816	8.54396	8.64992	8.30552	8.34318	8.09808	7.31044	8.74717	7.45814	8.07998	7.92018	8.19544	8.18913	8.83246	8.29892	8.77523	9.11458	8.64557	8.49391	7.4857	9.08894	9.25699	7.6767	7.4377	6.88397	7.50057	8.17213	8.39786	7.82733
ACOT13	0.720858	0.0146923	0.0488686	8.18191	7.46105	9.21041	6.73503	8.90644	8.35783	8.58561	7.47327	7.21242	7.57406	8.33773	7.62495	8.18634	8.36342	8.20439	8.88721	8.96164	9.09921	8.22428	8.34762	8.02833	7.40945	8.73458	7.30369	7.5122	7.18576	7.01025	7.90324	7.85114	7.5377
ACOT7	1.46046	0.00102464	0.00755519	7.59929	6.13884	8.53755	8.19666	7.49127	7.66339	6.36444	6.74139	8.76137	7.81713	7.03053	6.36969	9.42355	7.57727	8.24217	8.04454	6.44272	7.05112	6.26384	9.38489	6.10461	8.1651	7.94989	5.89329	6.18682	5.57411	5.72105	6.85609	6.60167	7.56138
ACP1	1.15893	1.65373e-06	5.59723e-05	10.3273	9.16835	9.87087	10.3182	9.89823	10.7273	10.843	9.92152	10.6138	10.3063	10.4855	9.82891	10.6609	11.1172	10.4614	10.4229	9.58783	10.4873	10.566	10.4945	10.3022	9.59972	10.581	8.87096	9.23342	8.58236	8.83067	9.73676	9.75593	10.1055
ACP6	0.752151	0.00710539	0.0297695	7.63109	6.87894	6.88638	8.50865	7.91008	7.60931	7.69024	8.27613	7.06795	7.08301	7.80556	6.76297	7.49551	7.27544	8.42322	8.837	7.09413	7.91188	7.51978	7.67612	7.15549	8.0322	7.79744	6.51433	6.34608	6.58675	6.39814	7.70979	7.71855	7.06548
ACSL3	0.684379	0.000990436	0.00735514	9.3349	8.65052	9.33586	9.03929	9.51696	9.20138	9.48501	9.26501	9.41849	8.4881	8.98701	9.23017	9.5363	9.31024	9.11547	9.1588	9.95406	9.5363	8.99914	9.71627	8.99107	9.81813	9.9328	8.53279	8.1348	8.1153	8.39771	9.59168	9.13083	9.33194
ACTL6A	1.76309	1.18485e-07	7.50953e-06	10.2276	8.46452	9.82891	9.89689	10.1497	10.3911	9.10372	9.39202	9.66346	9.82312	10.8347	10.0228	10.8677	10.6164	10.6802	9.85558	10.5432	9.88019	10.8323	9.96347	9.91922	10.8104	11.109	7.70538	8.80477	7.94923	8.14745	8.86324	9.31708	10.8233
ACTL9	0.634613	0.000422969	0.00391486	5.04531	4.4107	4.73641	5.56499	5.2513	4.66187	4.72594	4.42994	5.45106	4.6075	5.12471	4.9052	4.99051	5.1327	5.55268	5.34281	4.76211	5.6868	4.78431	4.85188	4.69166	5.54679	5.27264	4.19608	4.6535	4.33469	4.21443	4.53494	4.53053	4.92298
ACTN1	1.3159	1.14776e-06	4.20173e-05	9.88267	8.56677	9.97529	9.94331	9.55281	10.5164	9.65005	10.0306	10.2123	8.91603	9.58839	10.1143	9.69761	9.56599	9.90819	9.91722	9.51626	10.4128	9.0347	10.1214	10.1033	10.0438	10.1592	7.67963	8.37782	8.26582	8.35872	9.46722	9.25143	10.4389
ACTN4	1.10948	0.0194078	0.0587058	8.99355	7.88407	9.86089	8.77871	10.1055	10.9695	7.59292	8.43815	9.07551	7.1977	8.23142	8.62762	9.58783	8.41509	9.28318	9.65394	8.37841	10.2864	7.80207	9.62584	7.41587	9.09383	9.21289	6.53092	7.37251	7.28494	7.87694	9.02108	9.21805	10.2249
ACTR1A	0.616331	0.0108557	0.0398939	7.39348	6.77715	7.99316	7.39362	8.00252	7.9542	6.63597	6.39228	7.18157	7.73224	7.1233	6.72439	8.39589	7.70161	7.28596	7.75404	7.23818	7.62671	7.08265	7.45725	6.30028	7.6767	7.78873	6.69348	6.6753	6.43519	6.70834	7.07088	7.07968	7.21527
ACTR1B	0.924761	0.00194655	0.0119981	9.26577	8.34101	9.18469	9.71579	9.6712	9.91299	9.01961	9.29046	9.42557	8.35783	9.20767	8.80026	9.4991	9.43469	10.0357	10.0098	7.92904	10.0519	8.81243	8.51898	8.55299	9.94491	9.15036	7.86045	8.37468	7.69687	7.88343	8.81469	9.41592	9.32091
ACTR2	1.39009	4.06844e-06	0.000112559	9.28343	7.89333	9.0091	8.7261	8.81646	9.64397	9.93202	9.26376	9.25143	8.15673	9.6899	9.48903	9.72555	9.46923	8.87008	9.27662	9.30177	9.66471	9.3008	9.14192	9.83468	8.60074	9.72069	8.28718	7.29478	7.15961	7.01724	9.0085	8.59267	9.35007
ACTR3	0.904075	0.000228482	0.00247874	11.1151	10.211	11.0254	10.9548	10.7427	11.4597	11.1322	11.2744	10.3851	9.82537	11.2889	11.1425	10.8595	11.1073	11.5527	11.0857	11.0407	11.2972	11.3192	11.4139	10.6992	11.5387	11.439	10.4726	10.1214	9.40534	9.7435	11.0254	10.4978	11.948
ACTR3B	1.25697	0.000874654	0.00669749	8.41857	7.1616	8.19666	8.77252	8.75048	8.78336	7.76967	8.69513	8.32689	8.01664	7.19447	7.14939	9.56285	9.71869	9.37772	9.14491	7.19724	9.25986	8.22734	7.44411	7.70117	9.19853	8.28276	6.81805	7.23087	6.47437	6.57174	7.89599	7.97858	8.43815
ACTR3C	1.19886	0.0015198	0.0100355	6.21374	5.01489	6.13339	5.48631	6.67017	6.14879	5.44	7.35151	6.52331	5.57729	5.78495	5.04965	5.84483	6.35068	6.55645	7.70979	5.91216	8.36616	5.34179	5.60983	5.84045	6.35695	6.31146	4.04254	4.60559	5.31917	4.74014	5.56499	5.81689	6.33644
ACTR6	1.05128	0.000529128	0.00461689	8.28275	7.23147	8.56814	8.4422	7.16035	8.42494	8.32747	7.96979	8.66312	8.88764	8.09348	7.05586	8.1819	9.46776	8.87342	7.96377	7.30993	7.80691	8.48852	8.12127	8.41886	8.33809	8.89175	7.04452	7.14111	6.56702	6.59811	8.11962	7.91845	8.76546
ACVR1B	0.74915	0.0092784	0.035751	7.83014	7.08099	7.67191	8.10792	8.29925	8.42239	7.92096	7.1341	7.49495	7.99576	6.97534	6.97742	9.07404	8.67026	7.36234	7.88707	7.20783	8.00925	8.69299	6.58922	7.85573	7.52156	8.21452	6.87667	6.77993	6.71832	6.79245	7.54574	7.77284	8.17826
ACVR2B	0.813561	6.6567e-05	0.000967964	7.61132	6.79776	7.63731	7.65541	7.6695	7.63514	7.74829	7.81326	7.47573	7.8961	7.44833	7.25902	7.77752	7.16691	7.8749	7.81646	7.51914	7.43137	8.61311	6.72155	7.02866	7.52751	7.92222	6.47126	6.80582	6.40413	6.62515	7.10791	7.37229	7.81159
ACYP1	0.904848	0.0141902	0.0477458	7.94938	7.04453	9.10372	8.42979	7.94923	7.59431	6.65353	6.83348	7.78473	8.30222	6.98333	8.35156	7.96713	9.25492	7.77231	7.92086	7.63946	8.07628	7.70992	7.59405	6.57625	9.22078	8.36514	6.66023	6.86801	6.0613	6.61955	8.41767	7.64043	8.80339
ADA	1.14165	0.00239323	0.0139869	6.65439	5.51274	7.79592	6.35439	7.75726	6.95668	5.94985	5.76695	7.4559	6.40165	6.55398	5.35906	7.20614	7.46045	6.51885	7.21179	5.97816	6.8745	6.37098	6.80521	5.41181	6.06529	8.55628	5.37054	5.32253	5.3823	5.14379	6.07575	5.78152	5.58553
ADAM10	0.945269	0.00129328	0.00891549	9.83449	8.88922	9.38115	9.91415	9.21558	9.91354	9.99145	9.5363	10.6284	9.11815	9.58562	10.4506	10.9323	10.3003	9.69221	8.97266	10.083	9.68794	9.50467	9.55062	9.84511	9.66977	9.94409	8.71632	8.1819	8.01978	8.53321	10.3308	9.55335	10.4411
ADAM17	1.20137	1.63737e-05	0.000325483	8.13593	6.93456	8.01059	7.76271	7.97993	8.41095	8.08983	8.24406	8.55801	7.86283	8.58999	8.01099	8.24037	8.94093	7.58854	8.02804	7.07444	8.39014	8.04454	8.0622	7.70393	7.88794	8.84826	6.2618	6.55667	6.49207	6.4865	8.09457	7.71574	8.66116
ADAM32	0.799229	0.0113673	0.0412503	6.01551	5.21628	6.55466	6.46312	7.2822	5.70273	6.15	5.74636	6.19592	5.32502	6.30404	5.13748	6.45665	6.817	7.03184	4.45005	5.49869	6.35724	5.84579	5.49117	5.82489	5.04851	6.35939	5.64821	5.51148	5.81536	5.22595	4.37397	4.72272	6.29842
ADAM8	1.24569	0.0014296	0.00961473	7.1524	5.9067	6.57669	7.40925	7.23572	7.8749	8.33289	6.94014	7.10621	5.61586	7.3541	7.69905	6.11362	7.58355	6.64619	6.87589	6.44844	8.20257	5.8041	9.26952	6.58307	7.69933	7.15437	5.66183	5.40267	6.16553	5.39685	6.57893	6.2344	6.82729
ADAMTS1	1.6922	0.00393059	0.0197306	10.2896	8.59736	11.6313	7.80802	8.72108	10.244	9.29594	9.74422	12.0219	10.2773	10.5227	11.3849	10.4647	10.1673	11.052	9.87154	11.9068	9.89072	11.5681	8.30361	8.77871	11.0132	11.7559	8.0322	6.92113	7.91136	8.95679	10.8572	8.90552	9.94649
ADAMTS12	0.60046	0.018922	0.057671	6.71347	6.11301	6.71832	6.55086	6.58207	8.19131	6.41679	6.81165	7.99373	6.27152	6.54758	7.74368	6.45791	6.70864	7.12546	6.14563	6.31335	6.53617	6.34046	6.53432	6.06622	6.3329	6.96535	6.07186	6.10997	5.67959	5.86446	6.39061	6.56155	6.34237
ADAR	0.716587	0.000750923	0.00596566	11.8859	11.1694	11.7132	11.9232	11.9818	12.4033	11.9818	11.449	12.304	11.2937	12.0667	11.8628	11.6211	11.8379	11.8961	11.7683	11.5332	11.8961	11.6187	11.9931	11.5361	12.7931	12.1176	10.8661	11.0902	10.4873	10.6513	11.8888	12.0325	11.8997
ADCK5	0.923115	8.96848e-05	0.0012207	6.33868	5.41557	6.47037	6.79528	6.17594	5.98559	5.97488	5.84863	7.38943	5.50896	6.03491	6.42574	6.51487	6.48341	6.74921	6.78186	6.28132	6.56627	5.69685	6.20752	5.82158	6.96883	6.68494	5.126	5.22755	5.14354	5.24004	5.66137	6.09489	6.08459
ADIPOR2	0.668359	0.0107486	0.0396019	10.7517	10.0833	9.763	11.0254	11.1281	11.3365	10.875	11.1352	10.2488	10.8765	11.2663	10.3763	12.01	10.5826	10.2283	10.4348	11.1756	9.78956	10.9695	10.7311	10.5432	11.1192	10.0759	9.68236	10.035	9.57038	9.67361	10.6981	10.8404	10.8458
ADNP	0.619201	0.0244308	0.0690606	10.0019	9.38271	10.12	10.0244	10.3174	10.3952	9.49173	8.9422	10.0474	10.4139	9.63712	9.10536	10.2721	10.6549	10.4845	9.90133	9.54417	10.1625	10.7805	9.31769	9.80081	10.4805	9.40884	8.55737	9.6445	8.71594	8.96614	10.0091	10.4032	10.7394
ADPRHL2	1.40867	1.29405e-07	7.9743e-06	10.3551	8.94647	10.2704	10.6898	10.038	10.469	10.6659	10.1306	10.4185	10.1207	10.1707	9.90864	10.2399	11.3827	10.3746	10.4813	10.2222	10.4665	9.39927	9.96044	10.9898	11.279	10.1715	9.08489	8.85212	8.4815	8.51454	9.22405	9.52174	9.96347
ADRA2C	0.91704	0.0106236	0.0392424	6.86131	5.94427	6.97577	7.39032	7.28961	6.19848	7.18783	6.14201	6.83	5.8643	5.34766	6.28083	7.67249	7.77231	7.26834	6.58974	5.40635	7.14647	6.59961	5.89675	6.86652	8.31139	7.75062	6.22246	5.82005	5.85373	5.71382	5.97064	6.08493	8.16144
ADRM1	1.30754	0.00307485	0.0166634	8.3836	7.07606	8.65633	8.14319	9.21671	9.20039	6.48423	8.11421	8.96347	8.496	7.82812	6.60797	8.89587	9.48828	9.83535	9.43061	7.2187	8.4126	6.96762	9.39437	7.0387	8.89953	9.0343	6.57038	6.68947	7.12009	6.78629	7.55016	7.73998	8.11261
ADSS	1.16029	0.000296596	0.00301337	8.42654	7.26625	8.15911	8.97597	8.05779	8.66312	8.63347	6.98609	8.93276	6.84701	7.91741	8.05971	8.59333	8.80477	8.59542	8.40874	8.83613	9.19268	8.86745	8.02679	8.8517	8.43885	8.92815	7.15022	7.40681	6.21199	6.69536	8.065	8.06814	8.60741
ADSSL1	0.797441	0.0141349	0.0476439	7.21151	6.41407	7.83456	6.62473	7.29385	7.60113	6.61495	6.63572	6.83405	6.57255	7.5888	7.90728	7.13891	8.89907	7.8077	7.86201	7.61771	7.35433	6.49163	5.62705	7.37319	6.76955	7.25469	7.34904	6.27259	5.77209	5.56292	6.63209	6.89568	6.94971
AEBP2	1.40315	8.65678e-06	0.000202109	10.2122	8.80906	9.38545	10.4726	10.2729	10.9258	10.5252	10.3411	9.25492	10.0618	10.5534	9.58329	11.1281	10.1261	10.248	10.5952	9.54901	9.55766	10.6189	9.46525	10.7224	10.7656	9.70395	8.52955	8.58236	8.12421	8.37018	9.52937	9.71869	10.812
AFG3L2	1.32636	1.09158e-05	0.000239456	10.7219	9.3955	10.6337	10.5477	10.7532	10.3388	10.5214	9.54612	11.2726	10.6062	11.0356	11.3068	10.1585	10.9175	10.3685	11.1027	10.7138	10.243	10.6048	10.9423	10.4922	12.0184	11.0236	8.8771	9.13716	8.86363	8.77756	10.5265	10.191	10.7336
AGAP1	0.969813	0.000515252	0.00452551	7.48427	6.51445	7.4806	7.60521	7.48107	7.27882	7.11284	7.20398	8.12421	7.15001	6.712	6.49854	8.49362	7.91136	7.99812	7.39661	6.97695	8.50865	7.06604	6.89964	7.07838	7.91573	7.59109	5.97515	6.33973	6.30959	6.10582	7.17111	7.18531	8.17037
AGAP3	0.685537	0.00605275	0.0266911	8.65306	7.96752	8.18457	9.50772	8.92019	7.93226	9.29748	9.19796	9.0128	8.27761	8.44973	8.76137	8.8723	9.12972	9.09383	7.66319	7.87299	9.76711	8.29167	8.24284	8.38841	8.7735	8.45054	7.79012	8.05	7.70393	7.71078	8.18979	8.36053	8.27952
AGBL5	0.931173	0.00138656	0.00941898	7.10184	6.17066	7.00176	7.22829	7.91364	7.66141	6.70244	6.51836	7.16222	7.35747	7.11627	6.02715	7.57535	7.67249	6.66149	7.73721	6.16524	6.7742	7.83908	6.23253	6.41974	7.91136	7.7738	5.81551	6.28407	5.53858	5.99091	6.65548	6.73944	6.78893
AGK	0.955864	1.58519e-05	0.000318291	7.99025	7.03439	7.85535	8.20221	7.64601	8.36018	8.16733	8.28945	8.32297	7.39	7.00624	8.35944	8.47441	8.71347	8.13972	7.86826	7.44471	8.0056	8.00991	8.15208	7.74021	7.56831	7.94584	6.87163	6.89711	6.45672	7.01324	7.46282	7.50481	8.12383
AGL	1.09314	0.000309256	0.00311297	10.5543	9.46114	10.5377	10.8824	11.0605	10.1554	10.408	9.89976	10.0998	11.2776	10.8902	9.1895	10.2675	10.5583	10.6189	10.3543	10.9109	10.4821	10.7283	10.0228	11.1522	10.7736	10.2195	9.72744	8.48268	8.73787	9.30332	10.6274	9.88811	11.7051
AGMAT	0.694635	0.00916356	0.0354219	6.58525	5.89061	6.90645	6.21782	7.4907	6.96521	6.67982	6.36248	5.85944	6.33178	5.94039	5.89633	7.53571	7.41242	6.51388	7.31902	6.04869	7.18748	6.25678	6.79915	6.85053	6.35939	5.85076	6.2412	5.92172	6.25582	6.42339	5.26248	5.23905	6.09117
AGO2	1.11313	5.2682e-05	0.000816778	8.35906	7.24594	7.57953	8.28832	8.32865	7.57671	8.06726	8.38087	9.38489	7.69933	8.69075	8.6391	8.12518	8.4815	8.39014	8.02228	9.54195	8.04454	8.57535	8.29892	7.83122	9.10624	8.46344	7.20515	6.94157	6.74086	6.78377	7.76449	8.03977	8.38317
AGPAT5	1.05745	0.00492357	0.0231697	9.32249	8.26504	10.7712	10.3114	8.115	9.29945	9.37311	9.01394	9.66408	8.65502	7.18692	9.48621	9.59472	8.68582	9.60787	8.98952	8.89348	9.24452	9.96044	9.51432	9.28219	8.99559	9.33934	7.79839	7.67841	8.01557	8.2618	9.07196	8.76415	11.1108
AHCTF1	0.916364	0.0118368	0.0422901	7.86776	6.9514	7.65622	7.79804	7.85795	8.03659	7.54137	6.06322	8.84757	6.80663	6.78893	7.03858	8.96388	8.48431	7.64786	7.87836	7.35466	7.96909	7.9924	8.19334	8.04031	8.35565	8.76415	6.596	6.35915	6.04354	6.71933	8.10546	7.88488	9.01162
AHCY	2.13422	1.70756e-07	9.99206e-06	10.7757	8.64152	10.6671	11.4349	11.2646	10.8233	10.2111	10.0998	11.3381	11.6941	10.8052	10.3162	11.6688	10.6214	11.0759	11.0681	9.96131	9.88882	10.2231	10.4219	9.61863	10.7532	12.4128	7.74353	8.88681	8.08829	8.08262	9.48828	9.55959	10.6981
AHSA1	1.05095	0.000363903	0.00352505	9.76861	8.71766	9.99924	10.5943	9.57608	9.72138	10.0822	8.41919	10.4636	9.85708	9.25438	9.38713	10.7845	10.8535	9.75553	9.95056	9.18704	9.4274	9.58273	9.48288	9.0736	9.38489	10.2306	8.39666	8.83395	8.10505	8.28276	9.23342	9.45415	9.84177
AIF1L	3.17099	2.16814e-09	3.20045e-07	9.18993	6.01894	9.15547	9.84401	9.29945	8.83613	10.4162	8.83246	9.6016	8.76383	8.56087	10.7298	9.18794	9.24706	10.3841	8.24095	8.58476	7.15961	9.99045	7.6977	9.18841	9.72499	8.50565	5.39497	5.48051	6.21289	5.86342	6.73664	6.42523	10.2271
AIM1L	0.616101	0.00142877	0.00961197	5.90833	5.29223	5.86976	5.68031	6.01692	6.14083	5.02144	5.61496	6.66409	5.72637	5.49674	5.72081	6.25266	6.00629	6.23562	6.70286	5.49768	6.00303	5.58021	6.0253	5.56072	6.5111	6.07934	5.03539	5.31917	5.2551	5.31846	5.37869	5.44655	5.57621
AIMP2	1.05115	9.33348e-07	3.60208e-05	9.52219	8.47103	9.53076	9.21757	9.67034	10.3267	9.63545	8.97183	9.35059	9.44294	9.95694	8.76224	9.70892	10.1768	10.015	9.75037	9.19432	9.48501	8.95073	9.27662	9.30972	9.41655	9.93573	8.45433	8.4807	8.48026	8.34318	8.67979	8.38794	9.40291
AK022793	0.617279	0.00242275	0.0140943	5.86744	5.25017	6.02935	5.31198	6.14509	6.50141	5.33397	5.93607	5.92589	5.45399	5.46916	5.59628	7.16321	6.02511	5.94007	5.6353	6.03882	5.8819	5.84856	5.15988	5.50629	5.89729	6.27531	5.49979	5.32579	5.14562	5.26624	5.11635	5.1472	6.00883
AK2	0.994798	0.00033333	0.00330298	8.8268	7.832	8.90552	9.7435	8.15401	8.63694	8.88681	10.0298	9.15547	8.485	9.68615	8.64103	8.91113	9.24166	9.36935	8.45169	8.46892	8.55662	8.09384	8.09525	7.81794	9.39484	8.73505	7.66761	7.70646	7.57535	7.52592	8.08138	8.4353	8.72908
AKAP1	0.622231	0.00820849	0.0329589	7.47148	6.84925	7.53593	7.19555	7.23928	7.4041	7.45478	7.77688	7.66708	6.92695	7.59642	6.4317	8.08231	7.47429	7.58294	7.46869	7.23689	8.16089	7.59679	7.25416	6.76556	7.69434	8.12283	6.10843	6.5122	6.53145	6.50293	7.73655	7.70393	7.70422
AKAP9	0.592405	0.0116177	0.0417946	8.1434	7.55099	7.78447	8.29017	7.70202	8.40806	7.82861	8.56858	8.47406	7.41366	7.79567	8.11357	8.07405	8.53609	8.39336	8.27404	7.44577	8.9045	8.61636	8.03659	7.99696	8.19858	7.7224	7.44213	6.81088	6.76578	7.47005	8.59113	8.22599	8.57719
AKIRIN2	1.0896	0.000879579	0.00672685	8.40487	7.31526	8.87773	7.95289	8.49977	8.84342	8.59083	8.35011	8.21298	7.08625	8.48026	7.05459	9.29231	9.33997	7.82799	8.52526	8.9447	8.53714	8.15103	7.16545	8.46264	8.77948	9.21617	6.94308	7.14165	6.75826	6.77575	7.97267	8.30016	8.71613
AKR1A1	0.676634	0.00204555	0.0124474	11.3535	10.6769	11.3704	11.8888	11.1663	11.4933	11.716	11.3216	11.6122	10.7602	11.9786	11.0467	11.2144	10.7665	11.5436	11.2559	11.6537	11.6941	11.0203	10.7348	11.488	11.5781	11.1258	10.8624	10.5377	9.95607	9.86089	11.4234	11.421	11.3487
AKT1	1.26334	0.000156586	0.0018592	9.54957	8.28623	9.48029	9.66977	9.68845	9.1692	10.1554	9.59321	9.19796	8.37182	8.57812	10.6637	9.45284	10.0508	9.61637	9.43533	9.35491	11.0702	8.70631	9.07461	9.80352	9.99045	9.45342	8.69594	7.83436	7.54456	7.46439	8.93106	9.24706	9.51376
AL590762.11	0.708328	0.0059495	0.0264371	6.8687	6.16037	6.87432	7.25205	6.70467	7.14358	6.02458	5.92462	6.74034	6.83083	7.003	6.88793	7.41992	7.47977	7.22829	7.97139	6.17156	6.81334	6.27285	6.20925	6.43341	7.18761	7.11468	5.48991	6.12651	5.89519	5.86668	6.88409	6.69983	7.42331
AL832909	0.595437	0.00337083	0.0178035	7.52236	6.92692	6.98298	8.18806	7.3455	7.59928	7.74195	7.84628	7.5346	7.47415	7.20807	8.43634	7.77688	8.06513	7.61914	6.90706	6.97883	7.70422	7.63829	7.45849	7.90429	6.70795	7.13278	7.15308	6.86059	6.53858	6.87061	6.97742	7.16125	7.2416
AL833181	1.00853	0.00636424	0.027657	6.21312	5.2046	6.59413	5.83568	6.43698	5.77556	6.00311	5.43503	4.93067	5.76315	5.88754	7.94232	6.09636	5.69554	4.78705	6.37506	5.73679	7.01724	6.88762	5.40858	6.22269	6.69005	7.65395	4.76773	4.70947	5.70525	4.89427	5.64391	5.50695	7.51359
ALAS1	1.2509	4.06936e-05	0.000664576	8.92296	7.67207	9.26153	9.27875	9.14716	9.67195	8.26778	8.94336	9.47227	8.27223	9.46525	8.78273	9.46296	8.88701	8.8177	9.54849	8.2596	9.8311	8.66006	8.40367	7.99836	8.79658	9.57114	7.65244	7.34999	7.54428	7.26856	7.94668	8.27045	7.50549
ALDH16A1	0.622406	0.015894	0.0516114	6.79795	6.17555	8.0322	7.30851	7.61636	6.88657	6.26769	6.25153	6.44981	6.18355	6.09821	6.13093	6.85581	6.33875	6.89075	6.86059	6.41697	7.52691	6.45217	6.82982	7.55065	6.36769	7.34313	5.78207	5.854	5.89185	6.06758	6.58614	6.87163	6.89633
ALDH18A1	1.14147	2.47803e-07	1.33093e-05	9.94149	8.80002	9.64659	10.2666	9.79718	10.0814	10.5007	10.2922	9.99145	10.112	9.92104	9.39735	10.1497	10.3773	9.74743	9.46865	9.46776	10.4253	10.1104	9.33997	9.87154	9.80835	9.63073	8.42069	8.88869	8.67675	8.29382	9.10169	9.41849	10.3092
ALDH3A1	0.607789	0.0181342	0.0560685	5.69712	5.08933	5.72556	7.56745	5.72712	5.66461	5.14646	5.01675	5.93634	5.01774	5.27297	5.16669	5.81917	5.58606	5.91354	6.30629	5.19597	5.85199	5.11299	5.52181	5.41469	5.88173	6.50357	4.97391	4.90328	4.87752	4.92355	5.44365	5.41407	5.98714
ALDH3B2	1.90699	0.000735979	0.00587346	7.0495	5.14251	6.40341	7.40176	8.81916	6.69219	6.43043	9.12578	8.741	5.5233	6.92478	5.68732	6.23669	6.92461	7.90225	8.00794	6.72977	8.64881	5.16088	5.34453	6.37946	7.02609	9.1916	4.57935	4.9965	5.35544	5.10084	5.38717	5.43578	5.78723
ALDH5A1	0.848979	0.0455937	0.107004	8.30042	7.45144	9.40251	7.7682	8.34977	7.75198	9.13784	6.94627	8.48579	7.37211	8.56581	6.4835	9.66346	8.88378	8.70203	8.5307	8.08433	8.00794	8.12823	6.22518	8.9045	8.60581	9.36634	6.71597	7.04434	6.89172	6.87894	8.40729	8.7704	9.24322
ALDH7A1	0.729165	0.0287936	0.07746	8.48092	7.75175	8.82197	8.78157	9.3056	8.34669	7.85211	7.10971	8.41834	7.93692	8.7257	8.24481	7.92872	8.02667	8.15814	10.2565	8.17957	8.17089	8.44394	7.3541	8.66424	9.44045	9.6016	7.54574	7.76805	7.22156	6.97766	8.48617	8.51133	8.81193
ALDOA	0.918928	0.000192144	0.00217637	12.3773	11.4584	12.6115	12.7865	12.4749	12.0709	12.7865	12.9977	12.0325	11.9409	12.9339	12.9271	11.8961	12.7552	12.4816	12.5987	11.3664	12.4957	11.4704	12.0184	12.3087	12.675	12.3589	11.4831	11.3365	11.0236	10.745	11.9756	12.1863	12.3127
ALG10	1.06919	0.000485736	0.0043345	7.02699	5.9578	6.88447	6.70131	7.08769	7.47874	6.10991	6.20016	6.77331	7.27131	6.54983	5.77716	8.06104	7.55175	7.11523	6.91614	6.74832	6.50061	8.10247	6.88843	7.6839	7.57391	6.99953	5.44131	5.7313	5.51952	5.65743	6.9674	6.42985	7.61863
ALG3	1.17794	3.69716e-06	0.000104692	8.70623	7.5283	8.60117	9.60672	9.26041	9.12018	8.14745	7.88284	7.74195	8.18402	9.06065	8.5677	9.14924	9.26106	9.28099	8.65598	8.46344	8.95832	8.96777	8.67476	8.51719	8.79344	8.28877	7.17687	7.45566	7.6915	7.32293	7.64637	7.87646	8.3531
ALG6	0.938249	0.000807087	0.00630723	8.30046	7.36221	8.27761	8.24134	7.82198	8.30324	7.89853	7.98564	8.63985	7.56604	8.23497	7.11577	7.08069	8.05605	8.25284	8.4021	9.16034	8.49945	8.75614	8.24236	9.38284	8.92966	9.00406	7.60705	7.20986	7.18576	6.92965	7.98773	7.25323	8.75862
ALG8	0.65161	0.000605038	0.00510257	9.59562	8.94401	9.32809	10.0263	8.89311	9.93122	9.24297	9.50245	9.65027	9.8042	9.86024	9.39326	9.29848	9.47598	10.2349	9.88882	9.8685	9.3305	8.99219	9.57172	9.34866	9.30385	10.3763	8.61491	8.81273	8.86116	8.94618	8.98349	9.44562	9.78173
ALKBH2	1.3325	8.22687e-05	0.0011401	8.49152	7.15902	9.38848	9.36989	7.95187	8.44355	9.17122	7.64684	7.7469	9.32049	8.14167	7.4108	8.01235	9.26585	9.04383	7.5057	7.48969	8.21924	8.75829	9.05861	8.44745	8.37398	8.85301	6.52148	7.14819	6.95424	6.86618	7.56493	7.89912	9.19376
ALKBH6	0.702106	0.0316999	0.0832426	7.44245	6.74035	8.06422	7.25459	8.52526	7.31103	6.28558	6.24521	7.34744	6.39114	6.8512	6.77846	7.99918	8.20738	8.23972	8.36418	7.245	7.73414	6.6461	8.1851	7.26071	7.47137	7.29408	6.17927	6.16299	6.42794	6.47135	7.59122	7.60931	8.03289
ALYREF	1.41979	9.32892e-06	0.000214419	7.22637	5.80657	7.80133	6.65082	7.48941	7.26271	7.07385	6.91004	7.0718	7.45113	6.29003	6.71057	7.48941	7.30603	7.53236	6.71086	8.42782	7.24541	7.96482	7.35046	7.29276	7.31103	8.174	5.65567	5.81084	5.53959	5.44816	6.16424	6.22095	5.46344
ANAPC11	1.40774	1.66741e-06	5.6352e-05	10.7553	9.3476	10.9605	10.1864	10.4361	10.5566	10.7473	11.3381	11.3931	10.6597	11.0048	10.5738	10.8902	10.944	11.0552	10.5583	11.4907	10.6309	10.5922	10.9021	9.5775	10.8204	11.2889	9.12018	9.38545	8.73414	8.45959	10.0968	10.2894	10.0107
ANAPC15	1.51723	6.41971e-05	0.000941558	8.49972	6.9825	9.14431	9.25143	8.77776	7.80226	8.02353	8.17925	9.06211	9.19432	8.21418	7.46747	7.47518	9.07516	9.66069	8.79144	7.89816	8.29782	7.40752	8.45856	6.9886	9.50772	9.74976	6.71498	7.11468	6.71478	6.5071	7.34766	7.4958	8.56669
ANAPC5	0.740368	0.00466859	0.0222861	9.64503	8.90466	9.97864	9.72218	9.31587	10.1715	9.23476	9.37572	9.10272	10.2522	9.48621	9.33449	9.64926	10.6358	10.2025	9.3056	8.65882	9.69907	9.72974	9.14776	9.9457	9.45953	9.5815	8.13454	8.62572	8.43494	8.51756	9.86327	9.85192	10.201
ANAPC7	0.756172	0.00120993	0.00846843	8.6437	7.88753	8.97183	8.09196	8.15979	9.25986	8.96736	8.40438	7.97104	9.26899	8.8282	7.72789	8.2689	9.41592	8.97364	8.6607	7.84137	8.3915	8.67111	8.69075	9.09465	8.84234	9.09383	7.5181	7.54652	7.93226	7.69792	8.3553	8.27509	8.56548
ANKRD13A	1.0193	0.00666965	0.0285664	8.74598	7.72669	8.71476	9.61934	8.66953	9.84263	9.11547	8.73377	8.0364	8.20983	9.20627	9.18109	8.34407	10.0634	8.43294	7.99859	7.78283	9.13501	8.31139	8.87342	6.56889	9.5207	8.85394	7.57581	7.29765	7.19418	6.81805	8.78021	8.69421	9.19735
ANKRD16	0.627824	0.00492619	0.0231773	6.95222	6.3244	6.95974	6.62515	7.41401	6.99081	6.60054	6.2437	7.06142	6.53014	6.54962	6.21975	7.33477	6.71674	7.26414	7.74431	6.84692	7.42422	6.58138	6.81635	6.74108	7.74909	7.99121	6.44014	6.10785	6.70988	6.19122	6.27313	6.22416	6.54379
ANKRD17	0.598725	0.00655157	0.0282032	9.05759	8.45886	8.74639	8.37841	8.66361	8.86214	9.6112	9.73104	9.24753	9.08389	8.53609	8.99301	9.32809	8.68749	9.24011	8.76224	9.0563	9.16661	8.94917	8.8723	9.0663	9.91517	9.71413	8.09066	7.94154	8.18674	8.13938	9.23017	9.16468	8.6557
ANKRD27	1.10045	0.00238599	0.0139656	8.84503	7.74457	9.18048	9.60305	9.41281	7.91573	7.67249	7.84886	8.56087	8.33305	9.02546	9.31496	8.65633	8.6377	9.19679	8.74226	8.60789	9.96283	8.31059	9.19922	7.40275	9.0616	10.3862	7.09163	7.96742	6.87382	7.47113	8.37062	8.69281	9.55866
ANKRD28	1.04603	7.58109e-05	0.0010727	8.32832	7.28229	9.01569	8.24015	7.64335	7.70303	8.37182	8.42113	8.74413	7.5165	7.83222	7.9998	8.4235	7.87966	9.01713	8.42069	8.07804	8.57022	8.70056	8.22238	7.94021	8.84342	9.08999	6.78143	6.80108	6.82803	7.12059	8.08905	8.07356	8.54938
ANKRD30BP2	0.585385	0.00199341	0.0122113	6.82032	6.23494	6.60554	6.68777	6.59679	6.50109	6.9933	7.43874	7.07322	6.71578	7.52971	7.32582	6.84377	6.42092	7.1762	6.76966	7.08659	6.90841	6.94135	6.30028	6.46559	6.82488	6.83348	5.75955	6.59236	5.94784	6.08686	6.33627	6.68675	6.00822
ANKRD32	0.813169	0.00767882	0.0314915	6.20542	5.39225	6.96643	6.80571	5.31672	6.43828	5.90534	6.20594	6.70962	6.35068	5.49979	5.60865	6.1867	6.58195	6.55543	6.72053	5.88921	5.33235	6.06148	5.54239	5.75592	5.58236	6.82259	5.18412	5.27791	4.47603	5.14813	6.59129	5.67603	7.68115
ANKRD39	0.909993	7.61193e-06	0.000182954	7.1398	6.22981	7.1856	7.39769	7.65128	7.14138	7.38597	7.20585	7.41953	7.06727	6.6253	6.77309	7.39255	7.6977	7.38678	7.32396	6.32447	7.65395	6.76596	6.65839	6.72323	7.23335	7.16173	6.12242	6.25904	6.13472	5.77058	6.43519	6.65688	6.90053
ANKRD46	0.866058	0.00201398	0.0122945	8.8594	7.99334	7.97419	8.98768	8.32909	8.4029	8.71771	8.24965	8.98388	8.24406	9.14333	8.47846	9.42929	9.61412	9.46722	9.28997	8.53976	8.84121	8.95995	7.91492	9.02185	9.19082	9.42673	7.64306	8.33472	7.24678	7.27284	8.56313	8.89953	9.7
ANKRD6	1.14422	0.0165412	0.0528507	8.1307	6.98647	9.28533	9.32283	7.24284	8.38033	8.95995	7.73625	8.71771	5.98857	9.80081	6.97512	8.11261	8.44544	9.47134	8.80248	6.60035	7.98262	6.71991	6.14196	8.26473	8.174	8.52878	6.34055	6.86114	6.84755	6.71975	7.2185	7.93135	9.22132
ANKRD65	1.36144	0.00498906	0.0234009	7.16808	5.80664	8.63167	7.26051	7.31821	6.66073	7.76093	8.03316	6.53642	6.77711	7.32028	6.66881	6.59178	7.67314	6.60462	5.30943	6.02994	9.74658	7.10952	5.04682	8.86363	6.58614	6.96818	5.72121	5.79428	6.25033	6.21832	4.86175	5.99395	8.20015
ANKS1A	0.812815	0.000341367	0.00336415	8.98903	8.17621	9.20475	8.74717	8.77399	9.81461	8.96614	8.5677	8.83665	9.35866	8.59304	8.44931	9.43533	8.22534	9.30449	9.40783	9.90684	8.81303	9.10076	8.79387	9.14333	8.78384	8.56939	7.79084	8.04064	7.87161	7.86418	8.48225	9.00776	8.96258
ANLN	2.04363	4.57453e-06	0.000123671	8.36871	6.32508	8.40242	8.51426	8.2489	9.11207	7.42163	9.52228	8.87453	7.65409	7.36634	7.5468	9.39965	9.04654	8.12518	7.69024	9.31088	9.40359	7.66832	8.80381	6.72404	7.66806	9.36935	6.45582	5.47288	6.28273	5.85944	7.83436	6.04524	8.23853
ANO10	0.88792	0.000434484	0.00399237	7.44577	6.55785	7.34766	7.31533	8.03858	7.40348	6.56461	7.21504	7.47401	7.10461	7.37577	6.97125	7.32486	7.299	8.07728	8.46045	7.00531	8.27343	7.04927	8.25089	6.65696	7.36924	7.86598	6.20336	6.32985	6.15133	6.5828	6.98787	7.09187	7.36391
ANP32A	1.08898	0.000238298	0.00255495	9.70915	8.62017	9.06408	10.3174	9.20767	9.8835	10.314	9.29231	10.4299	10.2139	8.69379	9.55127	9.37504	10.2575	9.26266	9.29114	9.53421	9.15079	10.5487	9.2705	10.1741	9.85927	9.90609	8.36583	8.90596	7.96106	7.73528	8.94675	9.80615	10.0034
ANP32B	0.599818	0.0093454	0.0358944	12.1481	11.5482	11.9232	11.7759	11.6779	11.9097	12.3732	12.5987	11.432	12.1631	12.2829	12.5311	12.2906	12.9623	12.8075	11.9851	11.7945	12.0057	11.8151	11.6211	12.0325	12.92	11.8997	11.0902	11.4907	11.2359	10.8503	12.1718	12.4505	12.4554
ANXA11	1.17159	6.1688e-05	0.000916742	10.5239	9.3523	10.6379	11.2144	10.2666	10.6683	10.1631	10.4369	11.7608	9.9285	11.0714	11.7263	10.2619	10.5524	10.567	10.1631	10.0312	10.7926	9.97781	10.2111	9.97108	10.9094	10.0194	8.74413	9.00696	9.10707	8.99962	9.91722	10.3388	10.1943
AP000525.9	1.28602	0.0150451	0.0497015	8.66959	7.38357	9.34774	7.41513	7.9046	9.03161	7.59679	8.52878	6.54167	8.8742	8.85106	7.44904	10.4219	11.1522	6.78258	9.18994	9.02761	8.9083	10.1194	7.9864	9.90684	9.58488	9.1866	7.74353	7.16245	7.95851	7.87909	7.0488	6.50903	6.92379
AP1M2	1.04802	0.000461578	0.00417072	8.61854	7.57052	9.56453	9.44237	8.73549	9.21041	7.53307	7.69964	7.44038	8.10449	7.8354	8.92221	8.41185	8.97314	8.97819	9.06255	9.02633	8.98548	8.72304	8.59724	8.20856	8.25089	9.677	7.48224	7.39059	7.9644	7.5748	7.19017	7.82091	8.22565
AP2M1	0.636323	0.0349418	0.08921	9.80426	9.16794	9.75266	11.1243	9.87042	9.72744	9.66408	8.91666	9.18521	8.78157	10.338	10.1214	10.3162	10.2883	10.7195	9.48091	9.44406	9.85708	10.1083	9.11207	9.3081	10.7767	9.09201	9.40972	9.30772	8.11068	8.5006	9.82462	9.8543	9.70892
AP2S1	0.668497	0.00929056	0.0357618	10.4027	9.7342	10.7154	10.6076	9.97935	10.5622	9.89555	9.86024	10.0091	10.8934	10.9009	10.1625	10.6424	10.004	10.9127	10.8311	9.75095	11.4831	10.6032	10.0841	9.52937	10.2522	10.7502	10.5721	9.31945	9.16884	8.88075	10.3712	10.0928	10.4299
AP3D1	0.913809	0.00436922	0.0212517	10.006	9.09216	10.4483	10.6214	10.6358	10.2111	9.57038	10.0548	10.394	9.42039	9.75679	9.68325	10.3174	10.5898	10.8161	9.49352	9.67504	9.93202	8.19299	10.0787	9.55902	10.2152	10.4185	8.12169	8.73638	8.52075	8.64377	10.2025	10.3278	10.0468
AP3M2	1.11049	0.00234304	0.013767	7.85854	6.74805	7.5757	7.97604	9.11952	7.83822	6.98446	6.72709	8.27343	7.5605	9.44876	7.11071	8.57275	7.94794	8.00282	8.83125	6.7722	6.67029	7.86787	7.77212	6.74797	8.5584	7.97419	6.48284	6.94996	6.34987	6.15637	7.15833	7.39093	8.55573
AP5S1	0.753645	0.0146953	0.0488705	7.38602	6.63238	8.19334	6.62785	7.76303	7.94268	6.51736	6.73715	7.66141	7.79951	7.64151	6.04551	8.02353	7.59013	7.38792	7.52156	7.04833	7.07744	6.58812	7.06526	6.94261	8.44292	8.285	6.06758	6.25419	6.44844	6.00978	7.36577	7.64852	7.59038
APEH	0.993986	0.00121728	0.00850205	8.14518	7.1512	8.53572	9.04726	7.92281	8.63651	8.23034	8.66234	8.43885	7.36085	7.84038	7.99622	8.33115	7.70337	8.92314	9.52602	7.69249	8.66361	7.47844	8.065	6.7331	7.88597	8.41095	6.806	7.32456	6.68688	6.95273	7.55639	7.58063	7.10952
APEX2	0.72376	1.58853e-05	0.00031854	7.71552	6.99176	8.37744	7.84709	7.54137	7.57109	7.70222	7.89572	7.61989	7.36634	7.62812	7.86598	7.21119	7.9046	8.14877	7.62722	7.47573	7.39136	7.47814	7.55116	7.85906	8.39509	7.82759	6.71431	6.99006	7.01245	6.82585	7.1233	7.28462	7.45634
API5	0.762109	0.00396957	0.0198839	8.30191	7.5398	8.11038	8.39802	7.9148	8.27645	8.49443	8.70915	8.61112	7.26876	8.33341	7.39	8.58561	8.75581	9.01211	8.58999	7.52971	8.30552	8.04407	7.96818	8.60471	8.94045	8.97142	7.18249	7.25011	6.86372	7.12133	8.5006	8.32052	7.82782
APLNR	1.19746	0.00295629	0.0161828	5.90475	4.70729	5.53099	5.22891	5.43828	8.07526	5.16203	5.01849	6.82649	5.49904	4.75732	5.53911	6.58704	5.75632	6.6227	6.01095	5.07706	5.86076	5.35378	8.2189	5.29393	5.50376	6.12242	4.76017	4.72797	5.23254	4.74893	4.38317	4.39094	6.42092
APOA1BP	0.962231	9.09686e-07	3.56135e-05	11.2038	10.2416	11.3124	11.6508	11.0803	10.9143	10.9745	11.2419	11.1614	11.5681	11.5387	10.6898	11.0319	11.3172	11.6105	11.5714	10.6062	11.6366	11.0499	11.3042	11.0995	10.8064	11.488	9.97004	10.4592	9.71579	10.1707	10.5464	10.5873	10.8295
APOE	1.26263	0.0367992	0.0924298	8.73236	7.46973	9.0347	7.68182	9.16144	10.3763	9.78173	6.75306	9.50538	9.06488	10.1792	6.75906	10.4337	8.02903	8.20115	8.56395	7.87743	9.98628	7.72933	10.8952	5.82998	8.67626	9.88558	9.09697	6.60471	6.83293	6.10817	8.04271	8.13292	7.70646
APOF	0.745995	0.00146043	0.00976751	4.44641	3.70041	4.85261	4.42592	4.50796	4.42289	4.0079	4.42008	4.81691	4.10068	4.05365	4.1842	4.93565	4.71568	4.26357	4.21284	3.80166	4.66003	3.85212	4.23185	3.79664	5.07569	4.46713	3.48083	3.5125	3.68153	3.55604	3.99795	3.97364	6.01535
APOLD1	0.632033	0.0178512	0.0555166	10.4107	9.77864	9.18841	10.3244	10.3411	11.3505	10.6992	10.7805	9.86463	11.2389	10.7545	10.3862	11.0836	10.015	10.1902	10.0796	9.90819	9.65174	11.2105	10.4146	10.7362	10.5721	9.77073	9.54849	9.84119	8.94675	9.5016	10.3525	10.4813	10.4738
APP	0.847922	0.000142076	0.00173001	11.4294	10.5814	10.9009	11.6158	11.0048	11.3341	11.4067	11.7083	11.1982	11.6724	11.421	11.1998	11.7811	11.4044	11.1391	11.4783	11.7213	11.6078	11.7945	10.8795	11.9786	11.3524	11.0836	10.338	10.2545	9.97004	9.95056	11.5009	11.4747	11.7633
APPL1	0.62485	0.04139	0.100095	9.01683	8.39198	9.1454	9.52602	8.6557	8.96036	8.94139	8.78662	9.82398	7.72211	9.39876	8.55387	9.05388	8.27438	9.81982	9.63774	8.27532	9.58273	9.03796	8.17089	8.03952	9.92104	9.78294	8.35682	8.12244	7.63176	7.78144	9.29435	9.16508	9.25986
APRT	0.638065	0.0170002	0.0538091	8.74121	8.10314	8.74478	9.42103	9.1187	8.14606	9.07156	8.13212	8.19404	7.92135	9.52397	8.18493	7.81532	8.77305	9.77948	9.26844	8.30765	8.99655	8.14428	9.48179	9.0706	9.20355	8.34369	8.01899	8.43926	7.75548	7.45298	8.3549	8.59724	8.66361
ARAP3	0.90053	0.000213053	0.0023466	6.78434	5.88381	7.12694	6.99107	6.9486	6.8922	6.80878	6.1693	7.5815	7.1621	6.71541	5.9373	7.79084	6.82803	6.03935	7.17389	5.83004	6.72849	7.05487	6.84192	6.53373	6.14211	6.62356	5.99047	5.81924	5.80762	5.89978	5.70356	6.08219	7.33549
ARF1	0.979375	1.34915e-05	0.000283458	10.7239	9.74451	10.0688	10.6609	10.3152	10.6274	10.9623	11.2559	10.6952	10.8442	10.7618	10.7555	10.6909	10.6435	10.7029	10.4411	11.1614	10.7699	10.9472	10.229	11.3172	10.9423	10.5849	9.55545	9.72744	9.0663	9.02811	10.4495	10.6402	10.5477
ARF3	0.698133	0.00384237	0.0194069	9.88432	9.18619	9.74818	10.3535	10.8612	10.4435	10.014	10.244	9.54018	10.2598	9.40072	9.05429	10.6472	9.87314	10.0025	10.1853	9.00311	9.97781	9.88416	9.04038	9.89976	9.32283	10.1979	9.11952	9.07461	8.9359	8.76071	9.47431	9.75208	9.5016
ARF4	0.646399	0.0039824	0.0199381	11.7673	11.1209	11.8206	11.6688	11.8481	12.1795	11.8151	12.2875	12.0947	10.9274	11.8028	11.7811	12.559	11.5186	12.0484	11.9967	11.247	12.3902	11.4349	11.4531	11.5901	11.5436	11.6394	10.6952	11.2206	10.5839	10.5034	11.9931	11.7291	11.2336
ARF5	0.878386	0.000486586	0.0043387	8.37473	7.49634	7.90088	8.98349	8.89089	8.27509	8.10968	8.0302	7.92161	7.66083	7.81237	8.92636	7.50241	8.58745	8.13259	9.13838	8.47629	9.27986	8.62036	8.54938	8.33508	8.53155	8.71888	7.47874	7.71734	6.74152	7.16125	7.81595	8.06326	7.86045
ARF6	1.00538	0.000392977	0.00372398	10.02	9.01467	9.95694	10.4	9.69494	9.75329	10.7322	9.73458	10.3299	9.47781	9.45831	10.7473	10.0649	10.7427	10.1543	8.58447	10.0236	10.2488	9.71038	9.49607	9.63474	10.8489	10.3818	9.48621	8.7332	8.4422	8.24567	9.57469	9.60605	10.2651
ARFGEF1	0.888522	0.0017191	0.0109716	9.37604	8.48751	9.15647	9.67288	8.75673	9.61637	9.28427	8.39273	9.73189	8.115	9.79103	9.16034	8.93276	9.33449	9.47598	10.0312	10.1362	9.33449	9.70273	8.31139	9.68464	9.95056	9.95782	8.4021	7.96782	8.1048	8.03316	9.2705	9.14669	9.74284
ARFGEF2	0.644159	2.57478e-05	0.000464231	8.30044	7.65628	8.00116	7.89459	8.04271	8.18257	8.09965	8.50516	8.49191	8.05971	7.84709	8.25351	8.77675	8.60313	8.40543	8.72708	8.21819	8.53572	8.06307	8.137	8.48225	8.7105	8.1651	7.61029	7.36892	7.74399	7.60705	7.96818	7.63924	8.40729
ARG2	0.636517	0.030671	0.081118	6.13479	5.49827	6.29419	5.68942	6.13763	6.2913	5.51639	5.53267	5.59694	6.11791	5.52217	5.54254	7.78651	5.79143	6.07313	8.11261	5.86381	6.22141	5.98191	5.57204	6.92478	5.95111	5.93532	5.27901	5.2598	5.66652	5.66268	5.54418	5.57742	6.51011
ARHGAP1	0.847775	0.00149159	0.00990066	9.70733	8.85955	9.13203	9.86625	9.25143	10.1387	9.5177	10.0658	10.1452	8.47114	9.84511	9.62648	9.80674	9.98	10.1774	9.67915	9.70205	10.5952	8.86116	9.78032	9.86916	9.83535	10.046	8.6332	8.56581	8.33066	8.13345	9.63712	9.85708	9.16884
ARHGAP11A	1.64617	1.52214e-05	0.000310121	5.49211	3.84594	5.8808	5.79333	5.97643	5.46049	4.60859	5.92711	5.67256	5.30595	4.6999	4.75099	7.18576	6.08736	5.6861	4.31322	4.20081	5.28014	4.98551	6.03693	4.52555	5.78403	6.43143	4.2087	4.0008	3.97247	3.7457	4.2154	2.93258	6.23345
ARHGAP11B	2.7451	3.19306e-09	4.34864e-07	6.94595	4.20085	7.51705	6.65882	8.00207	7.54238	6.75728	7.36607	6.79915	6.83805	5.74059	6.00247	6.46707	6.50174	6.14938	7.71437	6.03856	8.5965	6.42953	6.39556	6.73337	7.23742	8.61074	4.29721	3.75664	4.86826	3.85212	4.46972	3.96116	6.71274
ARHGAP12	1.00651	0.00321006	0.0172045	7.62591	6.6194	7.71201	7.62837	7.53742	8.32485	6.57031	6.70069	8.22944	6.65634	7.64912	6.38604	8.00925	7.46707	8.15838	8.72395	7.43985	8.37317	7.40204	7.91044	6.73412	7.38971	8.5256	6.46671	5.85583	5.90268	6.37935	7.86201	7.2498	8.24186
ARHGAP26	0.665731	0.0115375	0.041637	6.24165	5.57592	6.38077	6.85451	6.83191	6.18346	7.04394	5.77232	6.44962	5.57322	5.70433	6.20416	5.92717	5.63096	5.81924	6.05644	5.72556	5.77209	5.46173	5.89329	7.17843	6.43068	6.79954	5.68753	5.43538	5.38257	5.33512	6.08765	5.52724	7.62291
ARHGAP29	1.17914	0.0148681	0.049266	8.45266	7.27352	9.57819	8.32909	6.52539	8.85803	8.63065	7.26323	8.51595	6.88048	8.19043	8.60313	9.3008	9.29435	9.96742	7.68034	8.66745	8.8017	8.00532	8.84008	6.65565	9.35866	7.83798	6.1871	6.87359	6.54188	6.65868	8.6027	8.77717	10.1741
ARHGEF19	2.15984	1.52303e-08	1.61328e-06	8.01616	5.85632	7.85259	7.96935	8.66633	8.01124	6.71634	8.06154	8.30361	9.07714	7.79276	7.5921	9.26431	8.75862	7.36007	7.81374	7.91306	7.98507	7.94092	7.32567	7.48224	8.61835	7.23248	5.42039	5.351	5.75177	5.54294	6.15033	6.92153	8.61801
ARID1A	0.710747	0.00133016	0.00912021	8.16856	7.45781	8.22101	8.43223	7.88541	8.50096	7.70482	8.83323	8.08829	8.66234	8.37957	8.25779	8.06801	8.52178	7.85449	8.00048	8.16117	7.90563	8.47372	6.92907	7.68034	8.80477	8.08138	7.32172	7.48287	6.71249	7.31662	7.80999	8.10318	8.2618
ARL1	0.69342	0.0111571	0.040733	10.276	9.58256	10.0928	10.4845	9.40178	10.5252	10.8204	10.7427	10.2139	9.5207	10.0098	9.49352	10.8013	10.8934	10.3267	10.2781	9.35808	10.1902	10.4206	10.1562	11.4548	10.2164	9.90133	9.4191	9.62821	8.91071	8.7704	10.4402	10.3267	10.7691
ARL13B	1.79025	0.000240258	0.00256995	8.51397	6.72372	8.49391	8.74478	8.74226	8.70014	9.03161	7.89111	8.13091	7.65936	8.03289	7.34904	10.884	8.4126	9.4298	9.94155	6.28545	8.30828	8.4422	8.06455	8.52599	7.87579	7.95657	6.07967	6.21361	5.96475	6.94928	7.97788	7.15711	10.4045
ARL4C	1.8469	0.000103406	0.00136364	9.20194	7.35504	9.8505	7.03982	8.73683	9.14826	9.96347	8.62309	10.7462	7.74458	8.21993	7.98028	9.58101	9.8422	9.17751	8.07728	10.8248	9.55998	10.3921	8.87885	8.55768	9.85345	9.55004	7.18463	6.75446	7.13223	7.23151	7.51605	8.31139	10.0948
ARL5A	0.706208	0.00122315	0.00852704	9.0563	8.35009	9.10707	9.61226	8.58295	8.79865	9.12018	9.13138	9.57469	8.30996	8.44618	9.25699	8.99357	9.05902	9.50986	8.94917	9.0152	9.37311	9.08951	8.51426	9.30245	8.97688	9.349	8.47746	7.95049	7.74658	7.71688	9.32954	8.87958	9.16622
ARL5B	0.98575	0.00301752	0.0164187	9.28664	8.30089	9.37572	8.68938	8.93183	10.083	8.98684	9.2705	9.79505	9.45284	8.48133	8.0569	10.3594	9.44969	8.94917	8.59988	10.0742	9.25914	10.2545	8.32689	9.27468	9.15824	9.77138	7.74302	7.47633	7.35499	9.05861	9.31308	8.85931	9.70552
ARL6IP1	1.10852	5.06958e-06	0.000132411	12.5065	11.398	12.4711	12.3621	12.1484	12.3732	12.4304	12.7475	12.2051	12.6823	11.9756	11.9292	13.2807	12.1795	12.9417	12.6183	12.9417	12.97	12.2131	12.0637	11.9703	12.903	12.731	11.1298	11.4165	10.9371	10.7712	11.9891	12.1443	13.0055
ARL6IP4	0.666914	0.00152758	0.0100607	10.3178	9.65092	10.718	10.8013	10.0215	10.458	10.8442	10.6076	9.55831	11.1258	10.0492	9.70491	9.82207	11.1369	10.2619	10.201	9.86985	9.83866	10.246	10.2195	10.2721	10.5785	10.4553	9.63545	9.62996	9.30772	9.48288	9.64599	10.2035	10.2018
ARMC1	0.831553	0.00364581	0.0187326	9.21299	8.38144	9.22772	9.27403	8.99559	9.58329	9.0568	8.05338	9.87314	9.16258	9.79579	8.50745	8.25599	9.65572	9.30772	9.68236	9.40972	9.15547	9.64267	8.15247	8.57719	9.43407	9.98771	8.31059	8.16627	7.62955	7.95485	9.05078	9.17659	9.895
ARMC2-AS1	1.15451	1.06253e-06	3.95296e-05	12.4454	11.2909	12.8948	12.5311	12.3589	12.304	12.3351	12.92	12.4749	11.5612	11.7876	12.8321	12.2225	12.718	12.6855	12.8122	12.3266	13.0402	12.2087	12.5229	11.5387	12.8791	12.9417	11.2646	11.3295	10.9677	11.2283	11.4293	11.5259	11.9034
ARMC6	0.791326	0.00113913	0.00813715	6.72486	5.93353	6.77189	7.38571	7.37577	6.60757	5.80762	6.29035	6.90332	6.37151	6.3805	5.66856	7.13512	7.32857	7.20961	6.66061	6.27201	7.15984	6.19015	7.11756	6.25153	7.05112	7.10042	5.47237	5.83882	5.78462	5.78152	6.26375	6.4601	6.9075
ARMC7	0.602174	0.011532	0.0416303	6.64579	6.04361	6.74475	6.69564	7.17931	6.84018	5.76992	6.25793	7.0716	6.89015	6.53694	6.16714	7.28663	6.74333	6.49864	6.21939	6.32823	6.49926	6.06177	6.73238	5.89388	8.05169	7.2204	5.72213	5.86289	5.93625	5.78571	6.43453	6.52016	6.51816
ARMCX6	0.846718	0.00434588	0.0211938	10.2602	9.4135	10.3626	10.944	10.2377	10.8295	9.81388	9.73525	10.2922	10.0849	11.0883	10.1436	9.82462	10.7699	10.8535	10.3152	9.1187	10.7138	9.72499	10.2152	10.0016	10.6765	9.14776	8.92966	9.10169	9.16424	8.49391	10.1443	10.6472	10.8311
ARNTL2	0.757322	0.00348349	0.0181844	6.5393	5.78198	5.91943	6.12542	7.0869	7.00417	7.14796	6.75221	7.07063	5.86745	6.37946	6.79852	6.49515	6.86356	6.07352	6.13785	6.18943	6.90728	6.01744	8.14954	5.89562	6.73685	6.46411	5.93073	6.02564	5.39807	5.82541	5.91383	5.5982	5.78215
ARPC3	0.937272	0.000196581	0.00221347	10.2902	9.35297	10.6435	10.1657	10.2853	10.7893	10.9727	10.2993	9.34166	10.3851	10.2894	9.76825	9.76917	11.0426	10.7037	10.6152	9.66538	10.038	10.0252	10.8612	10.6504	9.47227	10.7336	9.76825	9.34774	9.31708	8.547	9.66346	9.47431	9.8685
ARRDC1	0.678078	0.000858905	0.00661453	6.56329	5.88521	6.52341	7.09034	6.8036	6.3435	6.6474	6.71957	6.73192	5.81377	5.89329	6.89067	6.70939	6.39641	6.4455	6.70131	6.27872	7.21469	5.87721	6.86961	6.37446	6.79173	7.36664	5.90747	5.57578	5.7829	6.14314	5.9167	5.98524	5.90914
ARRDC2	0.929719	0.00386617	0.0195099	7.32567	6.39596	6.87262	7.22525	8.40049	7.03184	7.35091	8.30937	7.98872	6.05184	7.80063	7.41587	6.46411	7.93358	7.39615	7.9251	6.02867	7.72078	6.16974	7.6044	7.56555	7.2555	7.41973	7.3528	5.95553	5.82656	5.85115	6.73221	6.65748	7.23395
ASAP2	1.63707	1.50933e-06	5.23236e-05	10.6983	9.06124	10.4873	9.9895	9.55831	10.099	11.852	11.2776	11.439	10.5952	11.1281	11.6313	10.5464	11.1206	9.65027	10.7532	10.3585	11.2389	11.0714	10.4472	10.4546	10.3363	10.5934	9.03742	8.94917	8.81193	8.1983	10.1096	9.26106	10.7348
ASB7	0.658897	0.00318985	0.0171243	7.043	6.3841	6.58229	7.18772	8.04407	6.74814	7.43452	6.49523	7.38916	6.50526	6.77011	6.6522	7.31558	7.54211	7.20366	6.44818	7.87811	6.90883	6.39421	7.15854	6.99231	6.9265	7.11059	6.04767	6.22119	6.07411	6.116	6.81615	7.02948	7.2586
ASB9	0.725713	0.00386458	0.0195062	5.07386	4.34814	6.08155	5.11906	5.19557	5.41398	5.35706	4.83393	5.10416	4.33394	4.24296	4.17166	5.36885	5.18862	4.96477	5.36447	4.47404	4.99063	4.76598	6.02615	5.01313	4.94818	4.98266	3.98493	3.88077	4.03796	4.10068	5.13781	4.94671	5.68348
ASCC3	0.699021	0.0135448	0.0463654	7.08375	6.38473	7.23289	6.97198	6.73781	7.03998	7.34099	6.68701	7.30302	5.94261	6.86459	6.10482	7.57581	7.84206	6.81038	7.04316	7.00417	7.98415	7.75421	6.88801	6.04891	7.89572	7.97063	6.08824	6.15186	5.74519	6.30426	7.37549	6.64334	6.79967
ASL	1.34032	8.11575e-05	0.0011288	7.80186	6.46154	8.2701	7.29733	8.67519	8.47406	6.91692	7.20732	8.29712	6.54748	8.23646	7.59038	7.18185	8.84514	7.99789	8.97887	7.30627	8.64992	6.99158	7.40807	7.40514	8.52955	7.82611	6.44825	6.2055	6.44359	6.26456	6.52983	6.87749	7.00812
ASNA1	0.761602	0.0182366	0.0562512	7.87935	7.11775	7.90485	8.37957	8.37124	8.97542	6.27364	6.54926	7.53956	7.71201	7.34744	6.9725	8.01535	8.99811	8.65537	7.73766	8.23815	8.42158	7.64254	8.40838	7.29948	7.87966	8.42466	6.96046	7.33867	6.46939	6.5709	7.55175	7.81532	7.59928
ASNS	1.10949	0.00356021	0.0184418	8.24043	7.13094	8.06588	7.56615	6.97418	8.42979	7.5234	7.81345	7.9948	7.40807	7.88656	9.52667	7.7003	8.56736	9.74875	8.03858	8.73894	8.87671	8.47078	9.40024	7.08276	7.35009	9.35986	6.41277	7.13624	6.45506	6.89033	7.91669	7.97457	8.76625
ASPM	1.89365	5.06489e-06	0.000132411	7.73228	5.83863	8.09558	7.05112	7.48841	8.15418	6.15818	7.7837	7.68273	7.9483	6.69267	6.99383	8.21195	7.87675	9.05218	7.69905	7.65335	7.90702	7.98326	7.96935	6.5896	8.34944	8.46582	5.53931	4.93895	5.72927	5.64842	7.88884	5.28698	8.30361
ASPSCR1	1.08859	0.000195325	0.00220515	6.62572	5.53713	7.06628	6.70737	7.10159	6.90126	5.93234	5.81557	6.92883	6.43755	5.98252	5.92717	6.91408	7.28897	7.09705	6.60479	6.17462	6.93378	6.05946	6.89446	5.73734	6.83027	7.94923	5.14288	5.22755	4.97451	5.3436	6.20216	6.33209	6.48136
ASRGL1	1.81015	0.000216508	0.00237588	9.37505	7.5649	9.51988	10.0468	8.9665	7.76303	11.1686	9.54735	9.20309	8.56979	8.35394	10.1801	8.96258	10.6023	9.69434	8.74413	8.81243	10.0373	8.97481	7.11442	11.2595	9.86985	9.49295	8.06024	7.68652	8.56939	7.98987	6.65985	6.42354	9.36747
ASS1	2.23672	1.41541e-06	4.98991e-05	12.3753	10.1386	12.5927	12.799	12.9791	12.01	12.565	11.7505	12.9623	11.7111	13.0402	13.1967	12.4093	12.4554	13.1554	12.6922	12.3732	12.799	11.2057	9.67195	11.5482	12.5366	13.5083	9.0786	9.54658	9.94908	10.0438	10.9094	11.3042	12.2957
ASUN	1.44691	8.51587e-06	0.00020025	10.9763	9.52942	10.2853	11.1298	11.2663	11.5212	11.6779	10.9191	10.3073	10.7083	11.3216	9.93828	11.7945	11.9549	11.4025	11.0663	10.2006	9.95212	10.9258	10.9472	11.1865	10.9143	10.7555	9.86197	9.06065	8.77154	8.96827	10.6113	9.90279	11.3042
ATAD1	0.608292	0.0148287	0.0491653	9.25097	8.64268	9.19735	9.56656	9.02633	8.8687	9.46571	9.07614	8.82568	9.52108	8.51426	10.1686	9.47972	9.09558	8.20185	8.64103	10.0342	9.11596	9.97935	8.79865	9.00185	9.80249	9.73617	8.61311	8.83862	7.83609	8.20804	9.26696	9.09326	9.40409
ATAD2	2.13197	2.12785e-07	1.17882e-05	8.6583	6.52633	8.53527	8.18402	7.97419	8.28293	7.86665	8.90552	9.45778	7.86263	8.52811	9.22466	8.73505	9.06896	9.66701	8.02353	8.66633	8.0569	8.48882	10.4546	7.73721	8.94882	8.94775	5.89347	5.48265	5.94544	7.36552	7.48467	6.98626	8.86591
ATAD2B	0.689045	0.00599495	0.0265638	6.153	5.46395	6.12959	6.17759	6.24476	6.09033	5.95186	6.05359	5.9708	5.4666	5.63861	5.82398	6.16038	6.5992	5.96566	6.15109	5.106	6.81143	6.7243	5.96459	6.04744	6.62545	6.61972	5.05509	4.79472	4.94897	5.29024	6.55974	6.13494	7.04292
ATAD3A	0.860004	6.46024e-06	0.000161189	7.72869	6.86869	7.77499	7.96742	7.79189	7.68737	7.04995	7.89429	7.55835	7.8804	7.8439	7.78836	7.61838	8.10419	7.51287	7.59871	7.54787	8.52178	7.21943	7.75331	7.32508	8.48464	7.64268	6.51579	6.88447	6.69234	7.22213	6.91997	6.97742	7.46534
ATF2	0.922664	0.00280715	0.0156348	8.74737	7.82471	8.39014	8.83161	8.40367	8.97481	7.87092	8.32763	9.24503	7.82584	8.88348	8.76546	8.42322	8.86783	9.90864	9.48224	8.55168	8.57719	8.36131	8.37124	8.67929	9.05861	8.92221	7.12672	7.48422	6.92754	7.34124	9.06717	9.00134	9.72011
ATG101	1.88366	3.38882e-07	1.68924e-05	9.25953	7.37586	9.15695	9.83069	10.5241	9.47227	9.37115	8.36453	9.79797	9.73525	8.34558	7.68115	9.84332	9.35346	9.80081	9.15605	9.02677	8.85471	9.59613	8.55908	9.77799	9.69434	9.58273	7.18078	7.28858	7.00597	7.06435	7.63176	8.08375	8.18457
ATG3	1.09748	0.000709988	0.00574824	9.99175	8.89426	10.5326	9.66894	10.1741	10.3195	9.54612	10.0373	10.4115	9.29332	10.1864	9.94236	9.41016	11.0787	10.752	10.1979	8.55268	10.7171	9.36747	10.3626	9.4984	10.322	9.17242	8.84826	8.75703	7.99286	8.137	9.91415	9.71627	10.2749
ATG4B	0.976157	5.69214e-05	0.000869401	9.03636	8.0602	9.03273	8.96081	9.18603	9.52602	9.15388	8.59304	9.27403	8.76183	8.79038	8.30361	8.1348	9.39927	9.677	9.55502	8.99005	9.74422	8.63651	8.08829	9.40072	9.30022	9.31708	8.00207	7.80703	7.81431	7.73766	8.30937	8.69075	8.97428
ATG4D	1.00242	0.00138136	0.00939243	7.22847	6.22604	7.37852	7.58464	7.61679	7.85278	5.80632	6.63992	6.94488	6.73385	6.28525	7.15001	7.2935	8.73733	7.65448	7.20694	7.36391	7.41807	7.05016	7.52475	6.13967	7.51422	7.85535	6.02154	5.87729	5.58255	5.9038	6.87314	7.09793	7.2749
ATG5	0.667659	0.0346844	0.0887328	8.02451	7.35685	8.11924	7.45055	7.87024	8.49106	7.64281	8.0714	8.52392	7.48133	7.80678	6.77785	8.8751	9.16661	7.6843	8.13166	7.61587	8.54814	9.23224	8.03858	6.38801	8.07474	8.70717	6.72507	7.35603	6.89189	7.02006	8.05936	8.0887	7.84163
ATG9A	0.969254	0.000124647	0.00157617	7.86193	6.89268	8.48579	8.17319	8.68705	7.55813	7.2749	7.84739	7.98295	6.81088	7.24913	7.32582	8.15136	8.18493	7.6821	8.07515	7.95657	8.29337	7.49237	7.80556	7.77598	8.115	8.19806	6.61438	6.54947	6.38638	6.4876	7.45257	7.86568	7.83685
ATHL1	0.789948	0.00248478	0.0143747	6.83079	6.04084	6.15125	7.86498	7.06476	6.64489	6.0766	6.81989	7.22373	6.79656	6.48058	6.40805	6.80506	7.34485	6.28407	6.16531	6.97806	7.16163	6.82825	6.18277	8.38033	6.35834	6.99462	6.03491	5.7488	6.31242	5.85332	6.17724	6.11834	7.26271
ATIC	1.09814	2.10163e-06	6.78214e-05	10.6608	9.5627	10.5076	10.8952	10.7129	10.6358	10.9287	10.4411	10.4813	10.1168	10.4172	10.9287	10.718	10.8699	11.2206	10.5999	10.9224	10.9695	10.0357	11.4119	10.6411	10.1467	10.6859	9.21617	9.42355	9.18048	8.98597	10.2875	10.2826	10.2513
ATL2	1.31606	2.93976e-05	0.000516207	8.92914	7.61309	8.68582	9.45123	8.51867	9.06589	9.06542	7.90563	9.57819	8.45959	9.01063	8.75088	9.31308	9.66408	8.93228	8.72343	9.1075	9.03742	9.16034	8.67195	8.63651	8.89258	9.52174	6.74493	7.41513	6.90367	6.87213	8.62762	9.11505	8.28832
ATOX1	0.595855	0.0235792	0.0672874	8.55035	7.9545	8.78517	8.65022	9.35866	8.96258	8.55942	8.16695	8.55471	8.29974	8.4126	8.71515	8.41509	8.22599	9.00776	10.1741	8.17856	7.78242	7.98564	8.66953	7.74399	8.21523	9.26844	8.19903	8.30965	7.05112	7.76403	8.05908	8.34407	7.97574
ATP13A3	1.06681	0.00240857	0.0140547	9.8613	8.79449	9.6016	10.5398	9.9895	9.70633	9.5363	9.46722	8.83293	8.74132	10.5265	8.96537	11.368	10.5963	9.98628	9.06488	9.33175	10.2473	10.5934	9.53006	9.55642	10.3565	9.41231	8.91826	8.018	7.9652	8.72652	9.92222	9.21671	10.9986
ATP1B3	1.0044	0.0026453	0.0149961	9.86644	8.86203	9.54612	10.3543	9.91207	9.97327	9.56941	9.40924	10.2558	8.98298	10.8795	10.1707	9.93717	9.98114	10.3862	9.91415	8.69114	10.9045	8.89003	9.86152	9.21709	10.745	9.11638	9.02463	8.27311	7.85906	8.30828	10.1207	9.5864	10.3638
ATP2B4	0.62295	0.0238055	0.0677173	9.33807	8.71512	9.65027	8.96827	9.05861	9.69648	9.34576	8.9083	9.25063	9.0942	9.48828	8.54911	9.31378	8.86363	9.41016	10.0822	9.96283	9.62708	10.1792	7.30764	9.97327	9.1135	9.96909	8.74257	8.99914	8.31972	8.48268	9.09606	8.65054	9.62521
ATP5B	1.07753	1.99338e-05	0.000378719	12.1596	11.0821	12.3815	12.8567	12.517	12.7552	11.7945	11.6257	12.4304	12.2829	11.7263	11.3056	12.5083	12.5432	11.7132	12.1674	11.6158	11.5993	12.9271	11.9232	12.0912	12.1888	12.7362	11.2092	11.172	10.432	10.6486	11.5163	11.5144	11.8225
ATP5C1	1.04787	6.87007e-05	0.000991717	11.726	10.6781	11.9577	12.0057	11.3788	12.3902	11.6045	10.5094	12.0057	10.6128	11.4645	11.4437	11.4704	11.8066	12.2424	11.9891	12.0364	11.6826	11.9258	11.602	11.4531	12.1319	12.6349	10.6424	10.7283	10.1574	10.1269	11.3216	11.092	11.6232
ATP5E	1.12786	9.38213e-08	6.2584e-06	11.6635	10.5357	11.432	11.5415	11.4976	11.5993	11.7683	11.6747	11.6451	12.152	11.9034	11.6826	11.6158	11.7083	11.5916	11.745	11.7327	11.6122	11.7759	11.0018	11.5714	11.745	12.0709	10.566	10.4953	9.84596	9.84332	11.2576	11.2057	11.5304
ATP5F1	1.01278	2.9743e-06	8.89568e-05	11.7157	10.703	11.7759	12.0325	11.4764	11.4573	11.4621	11.5027	11.6257	11.4747	11.935	11.4511	11.7759	11.4831	12.1674	11.5304	11.88	12.1123	11.9068	11.488	11.7051	12.2051	11.4293	10.812	10.7029	9.86152	9.99258	11.5027	11.3461	11.8696
ATP5G1	1.16202	6.17839e-05	0.000916742	10.7937	9.63167	11.4831	10.9651	10.8721	10.8866	10.5189	10.5377	10.884	10.2985	11.6419	9.81461	10.8052	10.7171	11.0342	10.9586	10.7792	11.1595	10.4	10.8404	9.28099	11.3423	11.6366	8.87008	9.82958	9.3298	9.2815	10.1324	10.3467	10.6048
ATP5G2	0.953536	0.00216526	0.0129893	11.5255	10.572	11.3056	11.9161	12.1397	11.6884	11.3704	11.4907	11.5304	12.1319	11.3808	10.1673	11.9161	11.9193	11.8151	11.3849	9.88266	11.4272	12.2424	11.1939	11.1539	11.5737	11.9034	10.3784	10.5898	9.77002	9.66776	11.4025	11.6232	12.0269
ATP5G3	1.08499	1.54578e-05	0.000313263	12.0064	10.9214	11.9851	11.8409	11.5284	11.5144	12.1286	12.3589	12.3732	11.7588	12.6115	12.5035	10.9387	12.0364	12.1888	11.9193	12.3589	11.8888	11.6956	11.7111	12.4816	12.2332	12.1443	10.9311	10.8174	10.2222	10.1749	11.7051	11.6779	11.9409
ATP5I	1.39903	1.76169e-05	0.000345098	11.6016	10.2026	12.0603	10.5882	11.6688	10.4647	11.4831	12.0982	11.3087	12.3453	11.8888	11.8399	11.8825	11.092	11.9292	11.7236	11.4954	11.0499	10.5594	11.6078	11.0597	12.8869	12.2361	9.62648	10.2164	10.1251	9.54195	10.6504	11.0552	11.9666
ATP5J	0.744749	0.000399976	0.00376167	11.9659	11.2212	12.0947	12.2549	11.5873	11.5759	11.9577	11.9097	11.9161	11.8577	12.1085	12.0947	11.5853	11.7362	12.1795	12.4673	11.8888	12.4749	11.5916	11.1243	12.1631	12.4816	12.5229	11.0187	11.3951	10.6391	10.6284	11.7738	11.8719	11.6779
ATP5J2-PTCD1	0.865795	0.000636879	0.00530269	6.99421	6.12841	7.65424	6.89095	7.11664	7.35785	6.59219	6.47178	7.10665	6.17827	6.10149	6.63006	6.74668	7.66661	7.19071	7.32322	6.43149	7.67439	6.84246	7.49027	6.35068	7.43437	7.44892	5.61167	5.92838	6.07575	5.7023	6.51853	6.93387	7.1727
ATP5L	0.754814	5.77656e-05	0.000878775	11.9882	11.2334	11.8628	12.0403	11.4371	11.7633	11.8288	12.0269	12.2264	11.9327	12.1244	12.0009	11.9703	11.9327	12.4033	11.8628	12.1351	12.1718	11.5304	11.7387	11.9381	12.4607	12.2131	11.1911	11.4119	10.4546	10.6683	11.6779	11.9967	12.1397
ATP5O	0.804996	0.000372056	0.00358508	11.5158	10.7108	11.6257	11.8719	11.1043	11.4907	11.1835	11.5901	11.4907	11.4474	11.7945	11.5554	11.0407	11.449	11.7683	12.0912	11.3951	11.4597	11.372	10.7488	11.1816	12.34	11.8452	10.3988	10.6274	10.1354	10.0357	11.3626	11.7051	11.5027
ATP5SL	0.788233	0.00365865	0.0187901	8.07551	7.28728	8.65848	8.63504	8.32663	8.18595	6.92586	6.83071	8.39121	8.00207	8.31613	7.51359	8.61112	8.13903	8.43122	7.85475	7.11976	8.19694	8.13816	8.13224	7.34005	8.54477	8.81646	7.00856	7.10316	6.96617	6.95273	7.77312	7.91992	8.55103
ATP6AP1	0.965596	0.00310876	0.0168192	9.92162	8.95602	9.72138	10.1194	10.2231	10.2271	10.8661	10.6309	10.4128	7.76142	9.54132	10.0938	10.1961	9.92596	9.6958	10.6992	10.3525	9.79637	9.1135	10.2781	9.40534	9.91207	9.64267	9.44111	8.51243	8.28786	8.17645	9.23224	10.086	9.66069
ATP6AP2	0.83796	0.000685002	0.00560145	10.7399	9.90191	10.2093	10.4411	10.3371	10.1072	10.5773	11.0098	10.8028	10.2657	11.372	10.9759	11.1816	10.9021	10.6742	11.4098	11.0254	10.5241	10.5738	10.0271	11.1557	10.3685	11.1647	10.2204	9.7339	9.04474	9.19376	10.7473	10.4714	11.172
ATP6V0B	1.59834	1.40362e-07	8.45125e-06	10.9552	9.35681	10.6309	10.8204	11.3257	10.8721	10.2836	11.3849	11.2914	10.9298	11.4165	10.035	10.6048	10.7062	11.2419	11.2249	11.8225	10.9861	10.4748	10.477	11.7263	11.6609	10.8134	9.49039	8.68245	9.09867	8.8687	9.91657	10.0841	10.2843
ATP6V0E2	1.80961	1.54712e-06	5.33908e-05	9.40499	7.59538	8.96574	8.34081	9.8212	8.93544	9.43293	9.91857	10.2188	9.8311	7.7881	9.64801	10.0609	9.72616	10.4967	9.54658	7.48768	9.86541	9.16198	9.35411	9.58965	9.85858	9.2927	7.72414	7.39335	7.5915	7.18816	7.88794	7.78718	9.56857
ATP8B1	0.719559	0.0119493	0.0426121	10.3374	9.61785	10.812	9.77584	10.3961	9.99677	10.4337	10.3626	10.3952	9.79031	10.0681	10.7154	10.1194	10.8784	9.56656	10.6424	9.43819	11.0319	10.1543	9.42296	10.4274	10.7488	11.0407	8.97093	9.06355	9.19922	9.08489	10.6253	10.7632	11.2057
ATPAF1	0.806788	0.00981368	0.0372058	8.28409	7.4773	7.863	8.16999	8.24324	8.38226	8.1678	8.36726	8.81604	7.65854	8.31736	7.36085	7.84607	8.13684	9.13891	8.36977	8.00252	8.87342	8.08138	6.71343	9.53076	9.65945	8.31862	6.92424	7.83709	6.86067	6.94036	8.22342	8.07804	8.23249
ATPIF1	0.6494	0.00110176	0.00795647	11.8053	11.1559	11.9434	11.8577	11.8	11.4249	11.5304	12.5482	11.9409	11.7559	12.0947	12.1421	11.4802	12.3732	11.9097	12.2829	11.6078	11.9327	10.8852	11.1108	11.2543	11.9577	11.7362	11.1557	11.2105	10.8417	10.8635	11.2726	11.5916	12.1484
ATR	0.846237	0.000815761	0.00635164	8.75653	7.9103	8.69848	8.82776	8.9447	8.81193	8.72031	7.54933	8.72259	7.85906	9.09697	8.99062	7.88096	9.3327	9.59044	8.79779	8.66674	8.7261	8.35905	8.49977	8.90367	9.14716	9.0668	7.55469	7.64884	7.55078	7.69024	8.78517	8.23206	9.45083
ATRAID	0.639058	0.00106709	0.00777551	12.2704	11.6313	11.6508	12.0637	12.3859	12.4915	12.7475	12.3653	12.4711	12.4402	12.426	12.0269	12.3351	12.6349	11.7738	12.565	11.5853	12.088	12.3171	12.1484	12.5127	12.0269	12.4749	11.2419	11.5759	11.1614	11.1108	12.2718	12.426	12.4171
ATRIP	0.612502	2.28563e-05	0.000422134	7.66597	7.05346	7.74166	7.8105	7.65436	7.45136	7.68149	7.76223	8.26698	7.3487	7.65307	7.71664	7.58918	7.62955	7.88003	7.77098	7.53281	8.03412	7.24336	7.52592	7.20215	7.93968	7.95049	6.91209	7.00572	7.18415	7.09675	6.9783	7.14378	7.26599
ATXN7L3B	0.777088	0.0131164	0.0454082	10.2419	9.46486	10.4647	10.4146	9.59044	10.5487	10.5455	9.98628	9.86541	11.0759	9.97004	9.87934	10.5189	10.2377	9.96537	9.71579	10.5034	10.1641	11.5436	8.34944	10.8765	10.0707	10.5214	9.22466	9.63474	8.67912	8.63936	9.90761	10.7037	10.515
AUP1	0.850501	0.000308008	0.00310584	9.04212	8.19162	8.7721	9.09465	9.24359	8.9941	8.88869	8.98871	9.17419	9.12461	8.74031	9.79877	8.83774	9.00366	8.69263	9.76354	9.44471	9.59113	8.65962	8.79257	8.1632	8.61028	9.81741	7.67191	7.80865	7.86598	8.02094	8.80959	8.97266	8.73048
AURKA	1.11486	0.000468252	0.00421298	8.95622	7.84136	9.32702	8.33809	9.45284	9.23476	8.58309	8.85841	8.16009	9.45632	8.44116	8.76988	9.47676	9.37043	9.43061	9.04424	8.97026	8.21435	9.11505	9.40884	8.45814	9.38284	8.95517	8.35134	8.54541	8.8687	8.43494	6.50644	6.34135	8.58847
AURKAIP1	1.81321	4.79568e-06	0.000128045	9.15098	7.33777	9.69761	9.13838	9.13413	9.70273	8.12721	8.99655	9.52553	8.81273	8.9665	8.50096	9.71869	9.82207	9.13501	9.67626	8.43634	10.3363	7.61559	9.2412	8.16733	10.0634	9.4274	6.94627	6.99752	6.5306	6.58877	8.32408	8.63936	9.07954
AVEN	1.01715	0.0126553	0.0443395	8.49231	7.47516	8.30086	10.038	8.98871	9.16884	8.68147	8.57661	9.39388	7.64254	7.63707	8.28061	8.47207	9.41785	9.18426	9.09465	6.13093	9.43934	7.18772	8.66388	7.93883	8.59988	8.22699	6.50366	7.74786	6.87245	7.02503	8.34634	8.35565	7.76582
AVL9	0.744707	0.00242086	0.0140904	7.85919	7.11449	7.35555	8.25746	7.8394	7.66773	8.24965	8.66706	7.44772	7.68929	7.35176	7.34722	8.53674	8.0949	7.02322	7.94989	7.97244	8.89994	7.75901	6.88478	7.93994	7.5486	8.20318	6.75728	6.86459	6.84613	7.01575	7.51261	7.69055	8.21674
AX747750	0.616833	0.0130128	0.0452	4.56837	3.95154	5.06801	5.05838	5.18303	4.58926	4.81182	3.9303	5.58245	3.77459	3.78512	4.14131	4.6771	4.89663	4.55957	4.89203	4.01555	4.79546	3.94514	5.26302	3.62193	4.77791	4.53968	3.74391	4.04979	3.54398	3.58899	4.38088	4.4017	4.59594
AZIN1	1.43737	5.24548e-06	0.000135765	11.0774	9.64001	10.7238	10.7154	10.5524	10.9298	10.4389	10.0688	11.6724	10.4445	11.1897	10.7283	11.5586	11.2937	11.716	11.6232	11.6211	10.9237	11.2144	10.3575	11.5527	11.3274	11.8855	9.0563	9.42296	8.73202	9.51169	10.5826	10.5345	11.1647
B3GALNT1	0.85183	0.0223715	0.0647841	7.57109	6.71926	7.60977	8.16627	7.88597	7.47429	5.97195	6.97493	8.02716	6.52795	7.23742	5.79934	8.49293	7.70538	8.22803	7.94956	7.82733	8.37555	8.73137	6.72175	7.71023	7.95485	6.54398	6.30315	6.324	6.78285	5.99742	7.47075	7.43737	8.64793
B3GALT6	1.4511	5.96933e-05	0.000902102	8.82488	7.37378	9.32368	8.96537	7.95485	9.30449	7.81678	9.24359	9.54267	8.17175	8.43398	8.309	10.0968	9.64267	8.94336	8.1063	9.29848	9.61934	7.46685	8.84914	8.29925	9.0478	8.45814	6.94996	7.23818	6.59342	6.95551	8.34115	8.16447	9.25314
B3GAT3	1.02327	0.000433809	0.00399017	7.15939	6.13611	7.4073	7.45502	6.85609	7.2603	6.18243	6.95111	7.64448	6.61471	6.67006	6.6656	7.08841	8.13938	8.24284	7.44928	6.51388	7.01387	6.42226	7.26627	6.36777	8.0345	7.80646	5.79526	6.05327	5.656	5.84796	6.611	6.8532	7.4545
B3GNT5	0.843864	0.0067416	0.0287347	7.19174	6.34788	6.13152	7.04197	7.42119	7.53539	6.60329	7.36664	6.63761	7.37388	6.76556	7.05136	8.33376	6.52399	6.95359	6.77785	7.47005	7.61405	8.1153	8.24037	6.16651	7.36113	6.17424	6.0376	5.88613	6.5214	6.65388	6.57336	6.41489	8.55908
B4GALT5	1.5377	5.93522e-07	2.57055e-05	10.3087	8.77105	9.84902	9.61412	10.9423	11.3487	10.6189	9.74658	9.89406	10.1006	9.62521	9.97424	10.7119	10.9455	10.0805	11.2016	9.88416	9.88944	10.798	10.2619	9.32333	10.5019	10.5952	8.42979	9.10321	8.53714	8.38431	9.13602	9.03581	10.8852
B4GALT7	0.830488	0.0172145	0.0541921	7.80169	6.9712	7.73796	7.55786	8.77115	8.42612	6.3919	7.83742	8.54355	7.15984	7.75311	6.97018	8.27853	8.02303	8.0486	8.46197	6.61191	7.97679	6.66606	7.38666	7.33307	9.09326	8.27952	6.59567	6.67733	6.23471	6.39093	7.88129	8.04727	8.32865
BABAM1	1.51974	1.09896e-05	0.000240763	9.13657	7.61683	9.27716	9.15741	9.81461	8.78384	7.50772	8.17645	8.63003	9.92402	8.9844	8.56629	10.0796	9.32747	9.24069	9.82398	9.08951	9.47227	8.71594	9.43469	8.70239	9.27108	10.1324	7.32834	7.55052	7.04948	6.94431	8.19444	8.63388	8.89258
BACE2	1.74639	0.000285564	0.00293123	9.57592	7.82953	9.61354	10.7946	9.77684	8.9241	10.5354	10.7074	10.6927	8.84865	8.8008	9.80081	8.3655	8.80519	10.6177	10.694	7.02503	10.0057	8.2552	9.68543	9.64267	8.42239	11.0132	7.20807	7.72358	8.41919	7.5638	8.29673	7.76582	9.64331
BAD	0.667194	0.0367702	0.0923999	7.07363	6.40643	6.89622	7.54484	6.84448	7.04521	6.28328	6.60078	7.39537	6.56861	6.69926	6.22995	8.97542	6.92907	8.10012	7.73064	6.24303	7.22115	5.97056	7.2694	6.49498	7.95879	7.58435	5.89368	6.09284	6.20968	6.15544	6.89719	7.18975	7.03425
BAG4	0.922487	0.0185808	0.0569573	8.49978	7.57729	8.11702	8.93149	9.87647	10.4263	7.88129	7.19309	8.38143	6.83842	8.18979	8.30865	9.34211	10.0874	8.44116	7.88511	8.08544	8.47389	8.57275	7.9303	7.96282	9.03014	8.23853	7.16173	7.57953	6.74484	7.20143	8.29925	8.47696	8.8014
BAG5	1.36086	1.30783e-05	0.000276043	8.65314	7.29228	8.40641	9.05388	8.26698	8.55662	9.0085	8.00589	8.43447	7.81609	8.12208	8.54764	8.7735	8.95995	9.43576	8.71632	8.38431	9.30972	7.72711	8.47746	9.04474	9.28578	8.89089	6.73212	7.07863	6.56961	6.60105	8.41886	8.35342	9.14491
BAG6	1.02676	0.000482643	0.00431531	10.109	9.08228	10.6368	9.22132	10.4624	10.9224	9.75679	9.72138	9.42508	10.1516	9.67958	9.94075	10.5524	8.97653	9.89216	10.0483	10.8013	11.5901	10.4411	10.314	9.87548	10.1768	10.2497	8.7667	8.53501	9.12235	8.97597	9.09201	10.0016	9.56285
BANF1	1.42359	0.000112954	0.0014524	11.2743	9.85072	11.2889	11.1897	10.9532	11.6313	10.8824	10.3649	11.9034	11.2166	10.9677	10.469	11.9097	11.3766	12.2009	11.4025	10.5252	11.4531	10.4263	11.3124	10.3195	12.2264	11.8321	8.70447	9.76917	9.28476	9.13029	10.8711	11.3445	12.1827
BANP	0.625123	0.0104477	0.0387931	8.93065	8.30553	8.49106	9.28578	8.98124	9.61803	8.6973	8.40729	8.9451	7.82699	8.57621	8.47114	8.53856	9.30851	9.49102	9.40072	8.41919	9.35231	8.90413	9.67561	8.69513	9.57172	8.65537	7.77752	8.62223	7.75062	7.95289	8.66312	9.0668	9.16198
BAP1	0.631976	0.00348978	0.0182006	7.46916	6.83719	8.33115	7.863	7.87613	7.73478	7.19427	7.08362	7.66405	7.11764	7.34235	7.23524	7.66491	7.37184	8.01739	7.95455	6.79835	7.789	7.18702	6.92952	6.60932	7.67612	7.72886	6.53739	6.65795	6.48513	6.69486	7.08362	7.56417	7.15248
BARD1	1.6525	3.9563e-07	1.89373e-05	8.09607	6.44356	8.25444	7.83709	7.77444	8.24779	7.53902	8.07106	8.25922	7.70521	6.9408	8.79702	8.46712	7.44807	8.30182	7.24256	7.89318	8.25714	8.0356	8.94093	7.39222	9.11754	8.28309	6.61508	6.24355	6.12708	6.06671	6.778	6.83096	9.3081
BAZ1A	1.17629	9.55382e-05	0.00128583	7.79086	6.61457	7.64884	7.97038	7.90167	7.99758	7.92018	7.59969	6.97766	7.18491	7.58227	7.77284	7.6868	8.87885	8.53572	7.61559	7.32805	8.65212	6.87949	8.03072	6.71966	7.71664	8.61191	6.51062	5.85092	6.48572	6.33198	7.68353	6.82464	8.18735
BC017398	2.91754	0.000397986	0.00375656	7.78966	4.87212	9.77331	6.16758	7.18235	8.17418	5.45772	8.70382	4.74014	8.06345	8.29974	5.32413	10.075	10.0168	4.76853	8.90681	7.14919	9.557	9.0488	6.30884	8.80838	9.8274	8.65094	4.03036	3.82707	5.25138	4.14669	6.9302	5.04701	6.36847
BC038755	0.709027	0.0091146	0.0353102	4.68861	3.97958	4.80271	3.87892	5.00627	4.52777	4.17064	4.47581	4.61962	4.47645	4.65758	4.46786	5.82145	4.99951	4.59802	4.55081	4.23003	5.05827	4.39364	4.33222	3.72616	5.39611	4.42752	4.06278	3.98257	3.68057	4.0008	4.29438	3.85638	6.53199
BC040311	0.58555	0.0256896	0.0715318	3.32882	2.74327	3.20273	3.07382	3.80122	3.0045	3.41992	3.70265	4.28617	2.94409	4.08298	4.13633	2.53325	2.39567	3.23258	3.144	2.95974	2.94945	2.48077	3.1471	3.93126	4.22487	2.60297	2.73622	2.81354	2.45845	2.84688	2.40179	3.20273	3.97789
BC040412	0.722268	0.00158624	0.0103281	5.54292	4.82066	5.65202	5.79495	5.48284	5.92394	4.25086	5.28358	5.74238	5.05254	5.27946	5.13504	5.67353	6.0147	5.70719	5.70619	5.25661	5.88933	5.77996	5.35573	5.22673	5.62481	6.18217	4.45078	4.38088	4.38501	4.60487	5.47946	5.62295	5.92981
BCAP31	1.31661	2.49377e-05	0.000454409	11.7289	10.4123	12.121	12.4171	11.8696	11.4531	12.5366	11.372	12.0295	10.2001	11.0552	11.3664	11.7973	11.5873	11.7907	13.0055	11.9891	11.6587	11.0132	12.2087	11.3849	12.1351	11.5586	10.6326	10.3477	9.65813	9.9052	10.7792	11.1507	11.4854
BCAS2	0.986806	0.000338068	0.00333837	10.663	9.67624	10.7873	10.6253	10.515	11.4165	9.89755	9.77073	10.9337	10.3603	10.6348	9.95782	11.7839	10.8263	10.9311	10.4855	10.7632	10.9258	10.6214	11.1369	10.3514	10.6368	10.1184	9.2486	9.6712	8.88681	9.16787	10.7029	10.3801	11.1073
BCAT2	0.748664	0.017969	0.0557465	7.64277	6.8941	8.18706	8.04377	7.30473	8.23938	6.80521	6.73238	7.70684	7.03913	7.64209	7.30334	7.76383	8.02624	8.86431	8.08756	6.42625	8.98298	7.5234	6.67933	7.13861	7.4339	7.93933	6.40117	6.64499	6.38801	6.62894	7.46747	7.83404	8.2712
BCCIP	1.11197	7.31719e-05	0.00104088	8.52335	7.41138	8.54151	8.47255	9.00736	8.30765	8.38667	7.42119	8.65537	9.1916	9.15695	7.74786	9.68325	8.54857	8.89258	8.56035	8.39478	8.27376	8.41834	8.21266	7.42049	8.89994	8.70538	6.95403	7.35785	6.95204	7.13891	8.23361	7.83182	8.61491
BCL10	0.739686	0.000628306	0.00524085	9.10867	8.36898	8.92966	9.5207	8.35011	8.99559	8.96777	9.14192	8.81855	8.26607	9.38346	9.16756	8.97481	9.16424	9.34576	8.79702	10.1063	9.59168	9.0091	9.36354	9.33449	9.27403	8.71476	7.97334	8.15538	7.93883	8.18426	9.09465	8.86745	9.17357
BCL2L1	1.62175	4.92569e-06	0.000130289	8.10022	6.47847	8.91979	9.31496	8.17925	8.13667	7.544	6.96151	7.92192	6.87506	7.9771	7.89996	8.48298	8.14428	8.32553	8.27281	7.41046	8.44745	7.80865	8.25779	7.17931	8.72826	8.56278	6.1636	6.26384	5.93505	5.76461	7.15961	7.58408	8.85425
BCL2L2	1.02253	0.00180646	0.011343	10.0487	9.02617	9.95174	10.1919	9.44169	10.566	9.47716	9.15079	10.0365	9.9328	10.6411	10.7502	10.5634	10.515	10.1673	11.1779	9.32724	9.8547	9.47676	8.88869	10.1979	10.294	9.86089	8.4126	8.69561	8.21386	8.3729	10.2001	10.2619	10.6076
BCL7C	0.882603	5.80289e-05	0.000881607	8.09354	7.21094	7.84762	8.64656	8.025	7.73133	7.60562	7.63801	8.47696	7.75762	8.02939	7.88597	7.75119	7.76189	8.91414	8.84342	7.8744	8.62137	7.64884	8.36616	7.83348	8.63096	8.33028	6.80782	7.43805	7.47098	6.96411	7.00004	7.58464	7.83774
BCL9	0.635332	0.000562404	0.00482663	5.06187	4.42654	4.50471	5.04603	4.88393	5.53183	5.15912	5.18957	4.5857	4.75732	4.93426	4.71554	5.18336	4.89452	5.63673	5.08444	5.19469	4.86381	5.70816	4.6515	5.35043	5.29056	5.14418	3.74391	4.50044	4.52868	4.27353	4.39171	5.12097	5.05082
BCOR	0.796254	0.00249291	0.0144035	7.14174	6.34549	6.99133	7.28762	6.71094	6.86932	6.75997	7.43573	7.24135	6.58746	6.95935	6.46692	7.9816	7.91769	6.87894	7.58227	7.03396	7.34065	7.40807	6.16666	6.94777	7.00531	8.08795	5.54877	6.26686	5.65644	6.42044	6.84177	7.33867	7.45748
BCRP3	0.762112	6.97801e-05	0.00100413	5.47989	4.71778	5.36639	6.27548	5.68732	5.72791	5.33344	5.63282	4.95673	5.76838	5.37461	5.56184	5.8545	4.90496	5.70281	5.40226	5.95234	5.13978	5.47237	5.49489	5.68551	5.35283	5.40523	4.55999	4.76488	4.90918	4.90896	4.47645	4.68721	4.50523
BDP1	0.812667	0.010971	0.0402526	8.03603	7.22337	8.64881	8.46092	7.0716	7.84534	7.22302	7.30946	8.46669	7.58227	7.60851	7.30139	8.27473	8.09808	7.9502	8.54355	7.93906	7.60085	7.64422	8.08103	7.87208	8.53952	8.69642	6.88129	6.74696	6.45904	7.17639	8.35743	7.7191	10.035
BEND3	2.23126	5.1046e-07	2.28558e-05	8.22685	5.99559	8.96882	7.78772	8.26054	8.77628	7.75421	7.11442	8.59113	8.32689	8.34734	6.76763	9.3056	8.98494	8.08103	7.92475	7.72647	8.09306	9.80835	7.5888	6.54641	8.59195	9.08441	5.3174	5.60412	5.81689	5.54679	6.82161	6.86673	8.55995
BFAR	0.666538	0.0433397	0.10339	7.53117	6.86463	7.93516	8.11099	7.63439	8.07594	6.806	7.0725	7.24755	7.05872	6.43282	6.21361	9.09606	7.78092	8.18839	7.5426	6.92934	7.82198	6.64628	8.17767	6.82854	8.22534	7.7045	6.38315	6.78309	6.19782	6.44683	7.50863	7.86826	8.15642
BHLHE41	1.52387	0.00297429	0.0162531	9.32095	7.79708	6.78846	8.64769	9.28753	10.4813	10.2399	10.2164	8.56496	6.51557	10.875	9.09606	9.82312	10.3423	10.1969	10.138	9.15487	8.89857	8.42113	8.68386	9.01761	10.0107	9.54658	7.28907	8.11726	7.39518	6.99599	7.71448	9.2705	10.1143
BID	1.0884	0.0023003	0.0135681	7.45075	6.36235	6.75096	7.35925	7.69369	7.32239	7.23383	7.39335	8.67626	6.74086	7.15047	7.35579	7.28961	8.06169	8.58075	6.573	7.17348	8.6244	6.65026	8.57682	6.02193	8.69977	6.5781	6.42455	5.94703	6.03456	5.98013	7.02393	6.76388	7.40979
BIK	1.87933	1.10458e-06	4.07958e-05	6.80803	4.9287	6.68484	8.05552	7.327	7.06026	7.1247	6.85609	7.12643	5.57598	6.59884	6.76087	5.69596	6.31181	7.07823	6.21983	6.37545	8.35565	5.99633	8.17733	6.22177	6.11684	6.68355	4.58122	4.91742	5.4433	4.97908	4.85223	4.79896	7.37339
BIRC2	0.623474	0.00506253	0.0236679	11.6765	11.0531	11.5096	11.7083	11.3745	12.1593	11.4531	12.0637	11.9851	11.2543	11.6956	10.8161	11.7505	12.0009	11.9851	11.6956	11.2166	11.7505	11.2249	11.6956	11.1964	12.2906	11.7534	10.9237	10.5634	10.431	10.7406	12.0839	11.5759	12.304
BIRC5	1.41107	3.73743e-06	0.000105571	7.0796	5.66853	7.85872	6.72906	7.33919	6.75997	6.46266	6.96591	7.14623	7.5558	7.04241	6.23259	7.40204	7.95729	7.51623	6.55323	7.18531	6.72461	6.5574	8.07039	5.95366	7.41046	7.99082	5.62925	5.6163	5.96209	5.74156	5.58628	5.47568	6.33718
BLCAP	1.19856	0.000330656	0.00328645	11.0314	9.8328	10.9387	11.5387	11.2368	11.2206	10.8477	10.2704	10.9677	10.5748	9.89823	10.7037	11.6508	11.3042	11.3154	11.4044	9.94975	11.5239	10.478	11.1595	11.0082	12.1123	10.7119	9.74604	9.41711	9.25372	8.69075	10.7736	11.1156	11.8741
BLOC1S2	0.620228	0.0114527	0.0414158	9.69477	9.07454	9.63774	10.2651	9.85927	9.8055	9.63712	10.0537	9.43819	9.10169	9.8042	9.73772	10.566	10.5693	9.32138	9.56915	9.52228	9.10836	9.33449	9.37981	9.44294	9.94908	9.41655	9.48368	9.11617	8.16733	8.02769	10.0079	9.6445	9.76543
BLOC1S4	0.87479	0.000401983	0.0037725	8.59908	7.72429	8.0584	7.92374	8.43585	7.88431	8.79607	9.40972	8.31106	8.76771	8.39509	8.1166	8.76864	8.05169	8.87453	9.13029	9.28372	8.24256	8.04814	8.87137	8.90116	9.349	9.08236	7.02256	8.05806	7.51783	7.4318	8.15538	8.16009	8.47771
BLZF1	0.685368	0.00727839	0.0303388	6.93315	6.24779	6.42025	6.61191	6.76835	7.00196	6.268	6.78871	7.47483	6.17578	6.44862	6.41474	6.92424	6.96691	7.6738	7.61191	6.27556	7.50452	6.58996	7.48614	6.96217	7.31132	7.40608	5.81013	5.70015	5.72746	6.14971	7.25416	6.84511	7.44361
BMPR1B	0.971505	0.0304011	0.0805718	8.05422	7.08272	8.05303	8.17436	7.92753	8.77826	8.25997	7.70684	7.57887	9.45415	7.11217	5.46969	8.24601	7.81794	8.06487	8.62895	8.71388	8.10419	8.00282	6.02935	7.58681	9.96742	8.64656	6.01185	7.03211	7.04241	6.67216	7.03454	8.70325	8.86926
BMPR2	0.817533	0.00239119	0.0139869	7.85862	7.04109	7.63466	8.21993	7.89853	8.51179	7.72546	7.66431	8.32975	6.68282	6.77354	7.61405	8.4866	7.92838	8.29598	8.00432	7.65069	8.1249	7.70241	7.19	7.99576	8.04651	7.9294	6.63303	6.71706	6.39242	6.61355	8.14137	7.74909	8.47984
BMS1	1.34454	2.23183e-09	3.27336e-07	9.30599	7.96145	9.74185	9.28753	8.93955	9.44471	9.62648	9.16508	8.96574	9.76061	9.18794	9.38489	9.76825	9.32138	8.89213	9.40291	9.35986	8.63205	9.71295	9.25819	9.50392	9.3327	8.80415	7.78682	8.0699	7.53902	7.55292	8.44745	8.37258	9.23897
BOLA1	1.16837	0.00103002	0.00758267	7.78074	6.61237	7.78473	7.32322	8.19694	8.32408	6.9151	7.10437	8.27996	7.47844	7.61587	6.53473	7.58799	7.1671	9.21805	9.06211	7.68769	7.84859	7.43354	7.65794	7.25054	8.47294	8.32523	5.59735	6.6531	6.03507	5.93866	7.63858	7.81144	7.90702
BOLA3	0.988872	0.00334685	0.0177095	10.096	9.10714	10.8555	10.5622	10.6274	10.2651	10.0057	9.44169	10.2082	10.0508	10.2397	9.94649	11.2057	10.0178	9.87714	9.8042	10.2131	9.47913	9.87087	10.3174	7.57609	10.2497	11.5096	8.68187	9.36634	8.83774	8.8761	9.48501	9.39578	9.78886
BOP1	1.64723	3.70904e-05	0.000618623	7.02327	5.37603	7.68452	7.38666	7.29976	6.85451	6.92527	5.77065	7.9771	5.82621	6.17384	5.70412	7.30404	7.82167	8.6607	7.63478	6.53373	7.33086	6.22446	7.54594	5.98191	7.15549	7.92344	5.26176	5.24193	4.97196	4.90934	6.02715	5.84406	6.79223
BORA	1.59462	3.71228e-05	0.000618623	6.65298	5.05836	6.64948	6.78405	7.3421	6.9692	5.04147	5.80548	6.75938	6.79417	6.43698	5.39125	7.55786	6.90292	7.10257	6.592	6.60712	7.8199	5.66973	7.66319	5.90882	7.39584	7.38203	4.83066	4.5254	4.9449	4.70893	6.17156	5.1687	5.79006
BPGM	1.24065	0.00207721	0.0125966	7.41159	6.17095	7.62685	7.03982	7.53307	7.19633	6.30192	9.47134	7.05653	7.34521	6.41895	9.64599	7.30139	7.93004	6.19848	6.9837	7.64764	7.74166	7.17182	8.31613	6.50134	6.90645	7.74132	5.71794	6.05889	5.95935	5.55105	6.84655	6.89189	6.97909
BPHL	0.75502	0.00475523	0.0226007	7.16361	6.40859	8.285	7.19828	7.03184	7.75062	6.94248	6.22246	6.49423	6.70815	7.81038	6.62679	6.30324	7.31407	6.41697	7.76271	7.94057	7.39467	7.42673	6.46509	7.65128	7.26474	7.29478	6.35536	6.08611	6.4866	5.93261	6.58909	7.00176	7.2943
BPNT1	1.00196	0.000382302	0.00364918	7.43642	6.43446	7.33382	7.60085	7.4332	7.90906	7.20055	7.52184	7.21263	6.49508	6.07934	7.18748	6.95718	7.34722	7.59871	8.56426	7.75497	7.40116	7.04325	7.33656	7.58355	8.72031	7.9455	6.17005	6.31629	5.99117	6.09117	6.98548	7.05257	7.37466
BRAP	0.656403	0.00624959	0.0272953	7.37757	6.72117	7.90355	7.75062	7.38415	7.59233	7.39875	6.80561	6.86842	7.33788	7.06489	6.74814	7.55237	8.31862	7.49977	7.01875	6.42321	7.2936	7.64576	7.64075	7.09524	7.47429	7.89382	6.44981	6.22446	6.29585	6.21469	7.59767	7.54456	7.59613
BRAT1	0.646216	0.00247163	0.0143167	6.93523	6.28902	6.83273	6.98548	7.09294	7.18805	6.36631	6.23492	6.7742	6.76713	6.74381	6.21332	7.17776	7.24324	7.58526	7.38212	6.52539	7.81345	6.46865	7.01295	6.49903	6.90053	7.62307	5.77403	6.40366	6.27323	6.08553	6.51319	6.68446	7.14481
BRCC3	1.23715	0.000360953	0.00350684	8.50851	7.27136	8.93444	8.55801	7.42607	7.56481	10.0228	9.23164	8.54446	7.31821	8.09748	8.78226	8.30515	8.78469	8.62525	9.19853	8.26738	8.10088	8.13079	9.20309	8.38105	8.99005	8.45212	7.75762	6.60179	6.35563	6.57875	8.4655	7.86889	8.26806
BRD4	0.930966	0.000530145	0.00462084	8.65925	7.72829	8.44027	8.42816	8.41785	8.79745	7.76582	8.34881	8.6419	8.84826	8.7488	8.46959	9.18133	9.67034	8.41543	8.57193	8.43223	8.98262	8.23506	8.16377	8.51225	8.98597	9.44338	6.98927	7.59233	7.17031	7.14909	8.51554	8.95317	9.00234
BRIP1	1.79892	8.74512e-07	3.46774e-05	7.30908	5.51016	7.77475	6.78309	7.57133	7.28528	6.76741	7.25239	7.42422	7.71604	6.11298	7.20451	7.9329	6.44631	7.63707	6.4419	7.45243	6.21242	7.99725	8.95936	6.52249	7.24516	8.06767	5.51952	5.44988	5.26574	5.39525	5.99304	5.43752	7.99286
BRIX1	1.40606	2.33093e-07	1.26379e-05	9.63207	8.22601	8.83067	9.26585	9.44969	9.36301	10.1961	9.81154	9.27769	9.92312	10.2883	9.27468	9.23897	9.54346	10.4738	9.05119	10.304	9.1355	9.78956	9.90819	10.1045	9.65174	9.32138	7.62162	8.63715	7.96782	7.95255	8.92019	8.25671	9.70273
BRK1	0.732201	0.000491007	0.00435774	11.1835	10.4513	10.3085	11.4597	10.8661	11.3042	11.1998	11.5809	11.2508	11.2016	11.3381	11.1487	11.3788	11.1539	11.5186	11.6562	11.3423	11.3322	11.1441	11.3257	10.1648	11.359	11.3911	10.5106	10.4299	10.0223	9.78886	10.8104	11.1456	10.6113
BSCL2	0.898886	0.0118907	0.0424363	8.23314	7.33426	8.40771	8.65713	8.52496	8.76256	7.32456	8.30052	9.04563	7.38079	7.77444	7.86089	7.44695	8.88592	9.5864	9.25649	7.76362	8.8761	7.10685	6.81205	7.44079	8.63651	8.98952	6.29862	6.86093	7.55144	7.20682	7.88943	8.1983	8.28877
BSPRY	0.701868	3.87155e-05	0.000640036	6.94738	6.24551	7.11325	6.49008	6.85878	6.75526	7.02609	6.74679	7.08499	6.49987	7.06743	7.32789	6.36977	7.02416	7.42727	7.38113	7.20904	7.25879	6.49802	6.97947	6.66881	7.4172	7.01973	6.24572	6.06788	6.35194	6.05102	6.49176	6.26473	6.61845
BST2	1.14632	0.0123084	0.0434568	10.9159	9.76959	9.40646	12.7789	11.4722	11.2524	10.7013	10.6549	11.9097	9.90938	11.6232	10.515	9.08441	11.5239	9.99768	11.4511	11.2126	9.99768	10.2657	9.61746	12.1443	11.0588	12.3308	9.96044	10.3326	9.37374	8.16303	10.0618	10.7259	11.2419
BTBD3	1.65761	0.000396929	0.00374813	9.61113	7.95353	9.91354	9.36077	9.27986	10.2522	7.87743	8.10285	9.20706	10.3575	9.30508	7.08143	10.0902	11.0438	8.77914	9.93045	9.97327	9.89976	10.3673	8.89953	10.4483	10.4624	10.5943	6.97146	7.88526	7.77475	7.55116	8.70239	8.83613	10.2188
BTG3	2.58654	1.04711e-06	3.9147e-05	9.94108	7.35454	10.112	9.82891	9.07105	10.3053	8.91205	10.446	11.1921	9.00134	9.11908	9.02717	9.59168	10.1425	10.9677	10.4172	11.2776	10.6597	7.52536	8.95073	9.23224	11.4831	11.0033	6.63657	7.08276	6.87411	7.2086	8.55209	7.77312	10.4377
BUB1	0.694982	0.000259788	0.00272159	6.25245	5.55746	6.45159	5.96643	6.3283	6.31983	5.92838	6.13785	6.05204	6.09308	5.92887	5.89902	6.47321	6.93426	6.41534	5.99117	5.99421	6.40117	6.33444	6.22246	6.02564	6.45615	6.94248	5.65161	5.79591	6.14649	5.98447	4.95101	4.8153	6.25793
BUB1B	3.62851	5.34286e-13	3.59543e-10	10.0377	6.40923	10.591	10.4855	10.0938	10.6164	9.44876	9.51432	9.98189	10.8852	9.31308	9.34678	10.9371	10.7238	9.78708	9.29332	10.191	10.0091	10.1673	10.1337	9.17461	8.93631	11.0098	6.95668	5.646	7.34521	5.28828	6.91815	6.30104	10.1902
BUD31	1.30697	7.90225e-05	0.00110726	8.46373	7.15676	8.88973	8.19983	8.60893	8.48543	8.00621	8.25885	8.46045	8.3923	6.90053	8.45282	8.32485	9.10026	9.3056	9.18085	7.46636	9.01961	7.85358	9.38975	7.89707	8.69421	9.17707	6.56143	7.0893	6.57049	6.69564	7.93135	8.09233	8.13771
BYSL	1.46631	0.000409691	0.00382133	7.5659	6.09959	8.43447	6.67443	7.68567	8.0694	6.66686	6.34872	7.20877	10.8688	7.16426	6.63209	7.36061	7.43559	8.14247	7.31132	7.73689	7.51836	7.85308	8.09558	7.34035	7.48969	7.62699	5.93382	6.17005	6.28065	5.84123	6.13293	6.23887	6.78535
BZW2	1.38776	3.61568e-05	0.000607362	11.1208	9.73307	11.2688	11.8599	11.1507	11.5853	11.3505	10.0365	9.71413	11.8288	10.8204	10.3289	11.4854	12.2829	11.7945	10.4	10.6549	11.9756	11.449	10.7107	10.8092	10.1874	11.3137	9.90133	9.9473	9.95406	9.79579	9.48224	9.31769	11.6508
C10orf10	1.08267	0.010019	0.0377217	8.1175	7.03482	7.96106	8.47947	7.60036	9.33862	6.92445	9.71481	9.20259	6.87924	7.59561	8.98494	8.14773	8.3215	9.10984	7.11233	8.19371	8.6419	6.86139	9.06834	6.41489	7.97174	8.19086	5.73602	7.00507	6.67077	8.05072	7.41683	7.32954	7.86956
C10orf2	0.862018	0.00432897	0.0211368	8.19832	7.3363	8.78845	8.65915	7.96151	7.9839	8.71265	6.98626	8.06279	9.40072	8.40146	7.44014	8.71265	8.50163	7.97139	7.49801	8.21963	7.46771	8.68386	8.15696	7.76731	8.34046	8.30552	8.22632	8.32033	6.32487	6.3893	7.4023	7.35466	8.34081
C10orf35	1.49752	3.5196e-05	0.000594745	8.60467	7.10715	8.65054	8.70585	9.10076	8.27078	7.92192	7.40204	8.86254	9.33194	8.86214	7.41193	10.836	8.57344	8.90116	9.0478	7.92695	8.19858	8.71091	8.37808	8.15979	9.13029	8.32663	7.06435	7.21179	6.39712	6.63443	7.49519	7.84003	8.59267
C11orf24	1.09197	0.00538643	0.0246532	7.65856	6.56659	7.61587	7.9294	7.69731	8.32191	7.0315	7.15637	8.43815	7.14623	7.28194	7.07204	8.03178	8.96736	8.74681	7.40583	6.57194	9.24706	5.8152	8.2768	6.46112	7.67585	7.70566	5.78952	6.35154	6.06758	6.17353	7.54706	7.47032	7.89227
C11orf31	1.21112	3.84073e-06	0.00010795	10.874	9.66289	10.7997	10.3724	10.1554	11.1627	10.8535	10.9861	11.1156	11.4234	11.0111	10.0667	11.3192	11.421	11.1369	11.2937	10.5487	10.8404	10.1874	10.7833	11.2559	10.7712	11.1939	9.08853	9.60915	9.34049	9.04938	10.2721	10.6177	10.5302
C11orf48	1.05361	0.000272224	0.00282153	9.35499	8.30138	10.3575	8.87399	9.62996	9.52397	9.4191	8.99357	9.03988	9.92007	9.4549	8.23272	9.74604	10.2628	10.0884	9.19518	8.57856	9.6958	8.38143	9.45251	8.46373	9.72555	9.96283	8.04216	8.16418	8.34634	8.04377	8.65915	8.55268	8.8112
C11orf71	0.798672	0.00693684	0.029294	7.18442	6.38575	7.50452	6.79835	7.2555	7.15372	6.68039	7.16007	7.46564	6.2741	7.54891	6.15905	7.48133	7.2936	8.43732	8.66992	7.23063	7.2791	6.08147	6.493	6.44474	7.87525	7.51179	6.09095	6.08564	6.39466	6.24355	6.68777	6.8119	7.25879
C11orf73	0.724902	0.0386154	0.0955363	8.2596	7.5347	8.60709	8.78606	8.1348	9.02979	7.20215	7.85664	8.70961	7.00597	9.32476	6.864	8.37159	8.32689	9.22346	8.90733	7.97267	8.79292	7.24902	8.4377	7.09973	8.59145	8.65022	6.54651	7.82461	6.88251	7.16356	8.4422	8.34881	8.56736
C11orf83	2.61929	7.8694e-07	3.20948e-05	10.2053	7.58598	11.3643	9.58416	9.86768	9.51096	9.8505	10.3662	10.7767	10.4483	10.4945	9.18277	10.4435	11.4119	11.742	10.1096	7.67585	10.8218	8.61756	9.79423	9.09326	11.2937	11.2187	7.5888	7.80278	7.06166	6.64499	8.00991	8.40771	10.8477
C11orf84	1.17567	0.00108649	0.00786921	8.27514	7.09948	7.43249	7.90873	8.84607	8.78888	7.60338	7.86787	7.9046	9.2815	7.69369	7.54008	10.6189	9.1916	8.83197	8.36696	7.91897	7.9816	7.1779	8.55299	7.35579	8.49675	8.67074	6.81536	6.82825	7.28555	6.84574	7.39335	7.42861	8.02165
C12orf10	1.49265	0.00577394	0.025873	8.21295	6.7203	8.57421	8.77523	10.1297	8.66006	7.50713	7.36194	7.697	8.89509	7.1	6.00658	8.67362	8.44798	8.63065	8.19598	6.66512	11.5527	7.88969	7.01121	7.15508	7.95811	9.29945	6.00815	6.8542	6.06711	6.11161	7.32383	7.95689	8.49841
C12orf43	0.626969	0.0255791	0.0713285	7.03868	6.41171	7.6044	7.49237	7.01822	7.78393	6.35183	6.50366	6.6303	7.02079	6.52368	5.81205	7.63678	8.22216	7.34521	6.99133	6.13681	6.86812	7.13209	7.22957	6.72345	6.65739	7.56939	5.86944	6.36786	5.87971	6.10461	6.86801	7.38062	7.59734
C12orf5	1.10651	0.00335653	0.0177443	7.31074	6.20423	5.91519	7.05068	7.46978	8.82623	6.49802	7.32582	6.82902	7.98819	7.05789	6.51934	9.24901	7.43611	7.64728	7.68618	6.63992	6.8215	7.88096	8.60552	7.18531	6.99158	7.00927	6.78846	5.53733	5.99091	6.23528	6.79245	5.88097	6.20347
C12orf56	1.90372	0.000205408	0.00229149	6.25516	4.35144	7.37046	7.46707	5.50376	7.17282	4.35285	6.18226	4.84724	4.97489	5.21201	4.5201	6.50574	7.5316	7.63501	7.32088	5.81528	7.48004	5.79669	5.25212	7.14576	5.30951	7.04742	4.26535	4.56023	4.91809	4.18226	3.96017	4.22254	7.17007
C12orf60	0.615001	0.00989066	0.0373676	5.10935	4.49435	5.05776	5.039	5.86822	5.57836	4.44987	4.76736	4.7816	4.72272	4.70214	4.18476	5.42362	5.09045	5.41521	5.33803	4.47906	4.35144	5.13848	5.61025	5.0314	5.67696	5.84099	4.12277	4.21171	4.21664	4.54081	4.75718	5.11697	5.85794
C12orf65	0.824254	0.000383692	0.00365786	8.35407	7.52982	8.24706	8.59835	7.84534	8.44798	8.93671	8.53793	7.42497	8.38431	8.11038	8.22499	7.99609	9.14871	8.51179	7.96782	7.96909	8.15696	8.40771	7.91798	8.62854	8.99758	8.57193	7.22312	7.67787	7.05336	6.88339	8.09262	8.24855	8.75737
C12orf73	0.772557	0.00572264	0.0257036	8.3917	7.61914	8.66818	7.95226	8.15492	8.63096	8.72652	7.77444	8.00532	9.5233	8.1048	7.55813	8.73842	9.84669	8.06652	8.25055	8.05523	7.10772	8.93444	8.51179	8.48852	8.22382	8.82697	7.86019	8.00116	7.78144	7.79623	7.42673	6.84911	8.46792
C12orf75	1.30971	0.000858537	0.00661453	9.18373	7.87402	8.42188	8.91414	9.16468	10.3626	8.93444	9.62439	8.76839	10.1269	8.57237	7.77558	8.96574	9.54132	9.21907	9.3298	8.7257	8.86094	10.0057	10.7926	8.50705	9.42929	9.26646	6.34313	7.21943	8.91373	7.26006	9.19518	8.31263	8.7332
C14orf119	0.942315	0.0288865	0.0776642	9.54294	8.60063	9.49102	9.55127	9.19922	11.4025	8.69848	7.67222	9.2356	9.17958	10.0796	8.67979	10.9677	10.1083	10.2993	11.9518	8.97653	9.46132	8.14008	9.72069	9.48179	8.93276	9.54267	8.05238	8.79482	7.97589	8.26225	9.15647	9.36195	9.17242
C14orf142	0.960924	0.00727054	0.0303116	6.62445	5.66353	7.24311	6.78309	6.17936	6.28923	5.83708	5.03715	7.03602	5.25122	6.05503	6.44248	7.8031	7.30302	8.09348	6.80108	6.9793	6.79255	5.7313	6.24378	6.52738	7.44411	7.28629	5.26929	5.58036	5.26122	4.9699	6.50947	6.39093	6.57875
C14orf2	1.20437	8.4396e-07	3.36408e-05	11.6934	10.4891	12.0295	11.9703	11.5415	11.5936	11.3461	11.7714	11.0759	12.1351	11.5259	11.8825	11.4293	12.1863	11.9381	11.5124	11.9851	11.3626	11.5332	11.0356	11.8379	12.1827	12.0403	10.3411	10.5455	9.97424	9.64702	11.2016	11.2249	11.34
C14orf79	0.674209	0.000998695	0.00740205	7.40951	6.7353	7.85942	7.58995	7.52623	7.39114	7.15362	6.99741	7.41807	7.42571	7.11233	7.18692	6.85473	7.98946	7.82261	7.59431	7.25262	7.34025	6.79106	6.61065	7.58566	8.38069	7.34722	6.38063	6.69754	6.42832	6.70913	6.98224	7.21393	7.77908
C15orf37	0.729394	0.000871778	0.00668619	5.97264	5.24325	5.38603	5.78545	6.41944	6.22783	5.57509	6.12994	6.16982	5.71888	5.60055	6.02817	7.42108	6.2107	5.73663	5.83864	6.0198	5.77603	5.48495	6.6732	5.8556	5.96236	5.66107	5.12032	4.89223	5.03703	5.10057	5.64433	5.66499	5.71679
C15orf48	2.2072	0.00360162	0.0185932	8.20231	5.99511	7.63058	7.80419	9.33862	9.15388	8.5508	6.37345	8.25746	6.2434	8.32111	11.372	7.70992	7.33809	7.66431	8.6027	8.51156	11.1281	5.5799	11.8997	6.74391	7.85404	8.95591	6.40449	5.7409	7.38747	5.03032	6.36777	5.03969	5.41725
C15orf61	0.996583	0.000980235	0.00730785	9.0456	8.04902	8.88701	9.72912	9.12418	9.45778	8.64793	8.99811	10.4535	9.08999	8.31407	8.29308	9.0141	9.69907	9.35411	8.54541	9.18521	9.87765	8.0699	9.13083	8.25779	8.94274	9.36301	7.27544	8.30438	7.6044	7.53022	8.69421	8.88545	8.56858
C16orf59	1.37417	3.05356e-07	1.56298e-05	7.18399	5.80982	7.64588	7.44634	7.22525	7.4522	6.76883	6.57311	6.72657	7.71688	6.6568	6.13392	8.06024	7.87579	6.94606	6.96217	6.53154	7.20275	7.20451	7.84324	6.92883	7.51705	7.52209	5.69187	5.67552	5.86837	5.66807	5.93551	6.0196	7.10772
C16orf87	0.639843	0.0257701	0.071634	6.17193	5.53209	6.39533	5.85278	5.50649	6.05465	5.86246	5.1814	5.50887	5.39295	6.27201	5.83113	7.79054	7.02893	6.34284	6.34654	7.08794	5.41149	5.90098	6.03574	6.47643	6.5709	5.93102	5.31785	5.15912	5.4198	5.5009	6.3225	5.47237	7.00112
C16orf91	1.10476	0.00063814	0.0053074	8.59387	7.48911	8.37398	9.26197	8.2928	8.26146	8.80884	8.57344	8.20362	8.84287	8.02597	6.69668	9.23404	9.17618	8.35905	8.60151	8.16902	8.4235	7.73746	9.30508	8.68062	9.88665	9.43533	6.86059	7.53571	7.26109	7.10515	8.04001	8.13212	8.71515
C17orf58	0.791662	0.0187819	0.0573814	7.27085	6.47918	8.51023	6.20508	7.2498	7.32527	6.72786	7.7045	8.80381	6.56256	6.76515	6.68891	7.4318	7.49909	7.92594	7.41483	7.81734	7.30674	6.99809	5.79151	6.25391	7.48929	8.00282	6.13258	6.451	5.75869	6.08042	7.24147	7.21095	7.4841
C17orf62	0.724184	0.03751	0.0937214	8.49002	7.76584	8.68965	8.05523	9.1355	9.39735	7.77847	9.32091	9.04938	8.06885	8.14806	6.49371	8.40406	9.03581	9.41118	8.19737	8.68786	8.70325	7.68998	9.02848	7.21898	8.86214	9.39437	7.65967	7.39559	7.28007	7.08078	8.60391	8.57501	8.00991
C17orf89	1.06869	0.00260652	0.014861	7.86046	6.79176	8.17689	7.23986	7.85001	8.05303	7.21993	7.27723	8.87885	8.31082	8.37468	6.39084	8.59412	8.08603	8.59764	8.05426	7.55469	7.54288	6.99383	8.23034	6.51633	8.5404	8.69263	6.10229	6.69724	6.13243	6.13054	7.62783	8.06024	7.75477
C18orf25	0.845285	0.0160826	0.0520372	7.63687	6.79159	7.16691	7.23383	6.96796	7.33222	7.69731	7.21962	10.0236	6.63303	8.70447	7.04808	7.47401	8.1182	7.31117	7.36513	7.90591	7.54843	7.49495	6.72786	7.00153	8.35783	8.54396	6.46283	6.67982	6.19107	6.36702	7.54843	7.50034	8.13514
C19orf24	0.72251	0.0324701	0.0846338	7.42451	6.702	7.5824	8.48464	7.94421	7.11047	7.38165	7.73705	8.19012	6.55812	6.88721	6.18251	7.66366	8.0345	8.91519	6.52838	6.70407	7.86498	6.11771	7.94021	6.71737	7.73872	8.02833	6.44568	6.54207	6.18878	6.23879	7.35387	7.44283	7.0278
C19orf48	1.21338	1.37397e-07	8.36075e-06	9.04109	7.8277	8.79607	9.96131	9.30626	8.59615	8.54982	8.70751	9.54078	9.28533	8.91742	9.17751	8.99452	8.91414	9.71233	8.5126	9.16661	9.26376	8.66858	9.20987	8.52325	8.62683	9.43031	7.42438	7.75965	7.96979	8.00499	7.74636	8.06104	9.04291
C19orf52	1.31765	0.000136625	0.00167613	8.47567	7.15803	8.91794	8.67026	8.9241	9.3305	6.94157	7.36061	8.24928	8.56814	7.92161	8.30996	8.03506	9.61226	9.07516	7.76142	8.74031	8.7488	7.70868	9.06355	7.95622	8.63464	9.26041	6.67175	6.88614	6.78186	6.59647	8.01704	7.99491	8.67435
C19orf53	0.881146	0.000547427	0.00473591	10.9563	10.0752	11.4139	10.7747	11.8262	10.9605	10.5076	11.0552	9.96613	11.4645	11.583	10.246	11.0001	11.8452	11.1939	10.6789	11.2057	11.4234	10.5721	11.0883	10.1969	10.5129	11.2951	9.89823	10.5203	9.98838	9.86266	9.85786	10.3237	10.229
C19orf54	0.781469	0.00969399	0.0369049	7.36623	6.58476	7.39641	7.78873	9.43175	6.87051	6.75357	6.45207	7.67103	7.65409	6.69785	6.87977	8.2701	7.72911	7.69905	6.623	6.71811	7.48917	6.92979	7.3942	6.70029	7.5468	7.61322	6.51864	6.45812	6.3169	6.2008	7.19916	6.81494	7.74839
C19orf57	0.610637	0.000170344	0.00198143	6.62889	6.01826	6.88022	6.89388	6.68523	6.79942	6.03307	6.55898	6.63219	6.33385	6.58112	6.37771	6.69091	7.19724	6.79656	6.70975	6.46368	6.9692	6.5322	6.48714	6.17454	6.62904	6.79988	5.6353	5.7788	5.76274	5.8802	6.45122	6.60127	6.60984
C1orf106	3.65461	5.67592e-13	3.71043e-10	9.66974	6.01513	9.20534	10.1554	9.29231	9.13838	9.25864	8.93183	10.3423	7.80483	9.70658	9.86197	9.55004	9.33194	9.33194	9.49547	9.2257	11.0342	10.7259	10.4821	9.82257	10.458	9.67504	5.5402	5.85853	6.90392	5.61265	6.09302	6.08243	9.90356
C1orf109	1.38164	1.06668e-05	0.000235636	10.0588	8.67716	9.70633	10.2875	10.7119	9.557	9.92152	10.0474	10.1289	9.87647	10.2683	9.49781	9.04938	11.0681	10.0902	10.1006	10.6113	10.2522	9.70085	9.04383	10.875	10.431	9.51169	8.4422	8.95883	8.17941	7.64601	9.46776	9.36878	10.5566
C1orf116	1.10768	0.0204188	0.0606943	6.50225	5.39456	5.4943	7.86005	5.89773	5.18544	6.35316	6.80383	8.29202	5.57935	6.27403	9.27769	6.1458	6.08922	6.2008	5.46596	5.90397	8.23052	5.81098	7.99789	5.48335	6.92883	6.29621	5.23243	5.0701	5.6616	5.792	5.04764	5.5636	5.47829
C1orf122	1.01448	0.00742455	0.0307798	10.9868	9.97234	10.5477	10.1961	12.5311	11.4511	10.4873	11.4139	11.4976	10.7618	10.8711	10.683	10.9861	12.1123	11.2249	11.5681	11.249	11.2144	9.64983	10.9487	11.6419	11.3788	10.2807	9.13947	9.98508	9.21435	9.50467	11.0681	10.9224	9.01472
C1orf174	1.15623	0.000171896	0.00199442	8.52502	7.36879	9.28997	8.95769	8.21819	8.75829	7.11361	8.03099	8.97721	7.98872	8.37317	8.32485	8.85803	8.37062	9.0527	8.17925	8.21523	9.19796	7.87426	8.26054	8.63205	9.0091	8.63041	6.90628	7.47844	6.712	6.47828	8.32838	8.30937	9.23762
C1orf192	1.2167	0.013747	0.0467981	6.24449	5.02779	5.72856	4.82335	5.54649	8.18874	7.51978	5.43349	6.00071	7.03774	4.84222	5.47818	7.38971	7.44611	6.87202	5.73278	7.98987	4.75482	5.56712	4.43479	7.96347	6.00664	5.79657	4.87686	5.2174	5.29289	4.48527	4.78833	5.50598	6.82564
C1orf216	0.674429	0.0138138	0.0469419	7.42217	6.74774	7.86733	6.7202	7.88563	7.36826	7.02025	7.92018	7.73158	7.08078	7.56234	7.05902	8.22216	8.07039	7.87525	7.09332	6.74814	7.32088	6.67905	6.61527	8.01199	8.24808	7.20626	6.97742	6.63614	5.86837	5.99954	7.49211	7.51287	6.98143
C1orf27	0.848827	0.00154038	0.010113	7.6186	6.76977	7.06692	6.93497	7.70051	8.16117	6.93905	6.99065	7.458	7.5042	6.98059	7.09863	7.85664	7.97887	8.15208	8.59083	7.70646	7.93432	7.15075	7.57406	7.85699	8.2091	7.8732	6.64104	6.12063	6.32673	6.31481	8.03355	7.18185	7.89111
C1orf43	1.19431	1.58132e-07	9.34897e-06	10.8911	9.69681	10.3495	11.1138	10.8204	10.7348	10.7665	11.279	10.9532	10.9787	11.1352	10.6128	10.6402	10.8028	11.3341	11.1108	11.3643	10.9175	10.7618	10.5785	10.8952	11.0454	10.9861	9.55959	9.68845	8.965	9.08999	10.2993	10.5785	10.4239
C1orf52	0.745237	0.00279004	0.0156092	8.65677	7.91153	8.48852	8.70153	7.95622	8.89509	8.01819	9.01313	8.2602	8.61675	8.01336	8.45054	9.27202	9.15741	8.9083	8.31443	9.21088	8.80655	8.24928	8.70675	8.59228	8.94965	8.2618	7.56091	7.62162	7.22228	7.5234	9.00642	8.53456	9.60605
C1orf54	0.79443	0.000565957	0.00485348	8.94814	8.15371	8.72214	8.86591	8.83395	9.64599	9.04938	9.574	8.61369	9.99399	9.31088	8.88681	8.98212	8.81646	9.04093	8.59542	9.06255	8.29534	9.50938	8.71515	8.5508	8.24481	9.13838	8.95126	8.41731	8.01124	7.86472	7.7707	7.90702	8.41095
C1QBP	0.912868	0.000173991	0.00200954	10.358	9.44513	10.9034	10.0194	10.2271	10.2781	9.52937	10.3733	11.1138	10.7488	10.6368	10.0468	11.5144	10.3182	10.3022	10.5139	9.97935	10.4435	10.8555	10.2721	10.0658	10.0161	10.5313	9.20138	9.81325	9.30128	9.31241	9.50048	9.54195	9.1866
C20orf24	1.91201	1.19248e-08	1.32562e-06	11.8005	9.88851	11.3341	11.852	12.0775	12.2549	11.2951	11.2663	11.8262	11.745	10.8064	11.4186	12.5035	12.2875	11.9577	12.0547	11.4548	12.7362	10.944	12.5311	11.1663	12.6243	12.2009	10.0357	9.70491	9.71869	9.30245	10.4535	10.1158	11.2744
C20orf27	1.0197	0.00866943	0.0341876	7.68255	6.66284	8.47473	8.98124	7.84799	7.52099	7.66431	6.07997	7.76678	8.49977	7.63829	5.63126	7.90774	8.53572	8.58476	7.41401	6.69056	7.70795	7.70273	7.30615	6.12926	8.65288	8.17245	6.36487	6.91209	6.29011	6.23354	6.83579	7.34065	8.10646
C21orf119	0.727416	0.0113576	0.0412332	6.94265	6.21523	6.17882	6.12953	6.70092	6.88158	6.71983	6.632	7.05307	6.32494	7.05487	6.37941	7.28843	6.88975	7.98191	8.95591	7.61618	7.1292	6.25438	6.81593	6.6522	7.51836	7.07744	6.14408	6.07764	5.85728	6.35892	6.23629	6.61718	6.50357
C21orf33	0.7528	0.0104434	0.0387896	9.92362	9.17082	10.5738	10.2061	9.30245	9.8526	10.5129	9.87714	10.5943	9.30177	9.96207	9.57114	9.61462	10.1207	9.93871	10.5858	8.97937	10.7723	9.29046	8.6495	10.038	10.5922	10.5708	9.31166	8.96388	8.47696	8.43294	9.78224	10.0572	9.41281
C21orf59	1.11862	0.00016973	0.00197629	8.46421	7.34559	8.77115	8.15911	8.45249	8.09654	8.69594	8.25671	8.33305	8.29598	8.35662	7.76475	8.47037	8.53321	8.9045	9.43335	8.8392	9.14575	7.86733	7.13194	8.90503	8.76726	8.86431	6.7188	7.20732	6.65343	6.76976	8.34841	8.37582	8.16813
C21orf91	0.872062	0.00220085	0.0131271	9.9832	9.11114	10.4329	10.1279	9.52228	9.29748	10.1707	9.91922	10.6424	9.37914	9.31812	9.50048	9.91207	10.0107	9.81054	9.58047	10.8612	9.92514	9.93573	8.53609	9.92152	11.1054	11.03	9.19533	8.68938	8.89857	9.33322	9.33125	9.21907	10.6909
C2CD3	0.70605	0.00860509	0.0340101	7.64059	6.93454	7.86535	7.28066	7.20193	7.8825	7.35499	7.65622	8.20878	7.82444	7.31378	8.1182	6.57212	7.43249	7.65591	7.50269	7.65286	8.11994	7.18249	7.19633	6.90126	8.9332	7.86168	6.58521	6.56327	6.33907	6.55645	7.68582	7.87743	8.37515
C2orf15	0.923456	0.00179783	0.0113038	5.74931	4.82586	6.06578	6.58838	6.34194	6.45248	5.58913	5.39142	5.88102	5.1171	4.67067	4.96932	5.57476	6.40925	6.35865	6.10253	4.83942	5.84949	5.13416	5.03664	5.48527	5.92966	6.318	4.43479	4.60414	4.32354	4.4153	5.74656	5.43081	6.37984
C2orf47	1.45522	3.55817e-07	1.73955e-05	10.1989	8.74364	10.5464	10.3104	10.1443	10.5634	9.83407	9.47676	10.4678	9.2705	9.83407	10.1256	10.7571	11.0001	10.246	10.3495	9.97254	10.4329	9.97579	9.91797	10.3525	10.1443	10.3793	7.81922	8.85841	8.09558	8.43146	9.6224	9.63474	10.2738
C2orf69	1.40094	1.51752e-05	0.000309454	9.68284	8.2819	10.0161	9.48091	9.77331	9.54555	8.75235	9.7835	10.3092	8.32368	9.0942	9.51036	9.96742	10.2025	9.82891	10.1168	10.1928	9.93914	8.49255	9.85192	9.53134	9.99145	10.2611	7.61124	7.97788	7.73336	7.88656	9.20138	9.28099	10.0572
C2orf88	1.34703	0.017545	0.0549376	7.65544	6.3084	9.82537	7.09332	8.93444	6.79691	8.92019	7.32251	7.19702	6.56355	6.5296	8.81062	7.25195	9.2678	6.2804	6.14201	8.57768	8.87279	6.33564	5.88444	10.488	7.08911	7.9771	6.41021	6.19749	6.91815	6.46235	5.92242	5.93981	6.25912
C3orf33	0.873305	0.00227866	0.0134683	4.96692	4.09361	3.83975	4.81352	5.59175	5.1445	4.80542	4.35964	4.19878	5.34255	5.81395	3.70872	5.27094	5.42372	5.8022	5.64021	4.48145	4.43335	5.0777	4.30024	5.55105	5.63488	4.87377	3.9519	4.00759	3.76815	4.01555	4.55389	4.26462	5.16414
C3orf67	1.36639	0.00048732	0.00434016	6.36442	4.99803	6.59831	6.00153	8.18979	6.55323	5.6032	6.54758	5.61716	6.21535	6.14971	5.27028	7.20115	6.66293	6.15041	6.89866	6.16214	6.60528	5.29289	5.3901	5.00419	6.91882	8.06198	4.78478	4.71461	4.54814	4.70323	5.37439	5.86306	6.92257
C5orf15	0.691027	0.0175928	0.0550311	10.2487	9.55772	10.246	10.3575	10.1604	10.7632	10.2959	9.2555	10.5175	9.83332	10.6358	10.431	10.4535	10.0342	9.42557	10.8583	10.4738	8.70153	10.2152	10.0707	10.3388	10.9455	10.2894	9.15741	9.38787	8.72708	9.03694	10.7589	10.2781	11.1699
C5orf22	1.39319	2.17302e-08	2.06301e-06	8.63358	7.2404	8.10318	8.00156	8.97217	8.66168	8.47255	8.86073	8.10366	8.1983	8.99452	8.3915	8.95423	8.5677	8.86254	8.81062	9.91354	8.7721	8.25652	8.28429	8.69977	9.14062	8.46045	7.25303	7.16381	7.05273	7.20019	7.27386	7.49876	8.45658
C5orf24	0.960786	0.00114343	0.00816022	8.99575	8.03497	9.09812	9.39876	8.68965	8.60709	8.6343	7.70868	9.35915	8.02262	9.35491	9.437	9.18392	9.5864	8.8771	9.62821	9.11596	8.51023	8.93994	8.22184	8.59145	9.48288	9.47972	8.004	7.81734	7.15508	7.58022	8.92115	8.73202	9.97864
C5orf28	1.57291	4.09188e-05	0.000666824	7.34104	5.76814	6.75582	7.09177	7.50795	7.88072	6.26962	7.76033	7.281	5.36764	7.15308	6.13293	7.97038	7.95316	7.79744	8.28236	7.04938	8.34081	6.78165	7.30404	7.47954	7.81237	7.5468	5.20875	5.67898	5.16541	5.2513	6.74233	6.56205	7.98415
C5orf30	1.21374	0.00110201	0.00795647	8.59957	7.38584	9.10836	9.81672	7.14981	7.8976	8.45282	7.81713	8.58561	8.4126	9.04383	9.56791	7.37319	8.86968	8.23272	8.84461	8.66594	7.6821	9.09729	7.59122	8.45282	9.37504	9.26696	7.88096	7.52377	6.45904	6.73367	7.97993	7.73766	9.88665
C5orf34	2.46511	4.88801e-07	2.21066e-05	6.89126	4.42616	7.11764	6.70554	7.02831	7.49495	5.2969	7.00974	6.79417	5.37418	5.97655	5.4684	7.66531	8.10057	7.38255	6.59679	6.50126	8.27996	6.95518	8.07874	5.69292	7.31851	6.79255	3.73416	3.93829	4.556	4.32613	5.75273	4.24962	7.9771
C5orf51	0.891706	0.00101207	0.00748419	8.58877	7.69706	8.19444	8.83446	8.20804	8.91924	8.84199	8.26845	8.5508	7.58408	9.0568	8.13091	9.21907	8.58091	8.3549	8.80918	8.42816	8.73842	9.01761	8.025	8.97481	8.97481	8.15312	7.72911	7.31276	6.713	6.9783	8.65141	8.79779	9.08764
C5orf66-AS1	0.797564	0.00191128	0.0118317	5.34552	4.54796	4.43204	4.57011	5.35747	5.38371	4.87114	5.36012	5.65992	4.83168	4.48118	6.42637	5.54932	5.76056	5.51037	5.4368	5.53943	4.87174	5.66885	4.83724	5.59551	5.09574	6.49961	4.64223	4.23343	4.5058	4.2169	4.7536	4.93579	5.86257
C6orf132	1.25533	0.000389812	0.00370386	7.19183	5.9365	7.89599	6.50174	7.93727	7.04316	6.72578	6.08603	7.65951	8.72142	7.33718	8.36849	6.76966	6.60127	7.058	6.48627	6.56929	8.33857	7.60679	6.11285	6.40173	7.54238	6.94951	5.51731	5.80196	5.83577	5.54932	6.42904	6.48562	7.50739
C6orf136	1.10745	0.000245447	0.00261566	7.55814	6.4507	8.13345	6.81593	7.86703	7.81212	6.86283	6.89728	7.65888	6.67101	7.11829	7.58294	7.38232	8.43668	7.6128	7.33895	7.96685	8.59412	7.01267	7.82861	6.96796	8.54104	7.76564	5.72451	6.20416	6.1216	6.06503	7.32262	7.26627	7.4118
C6orf165	0.916285	0.0401449	0.0980843	6.93646	6.02017	8.10285	5.48735	6.34261	5.86837	8.07914	7.73008	7.74132	6.47155	6.31533	6.53163	7.37339	8.14098	5.79806	7.33549	8.06487	5.06801	6.40397	5.08639	8.76224	7.27544	7.47782	5.68802	6.20486	6.47321	6.16807	6.02238	5.5645	7.14521
C6orf226	1.16469	0.0025311	0.0145726	7.55639	6.39169	8.27613	5.49641	8.61384	8.32264	6.35892	7.24755	7.70538	8.37582	7.44439	6.23783	8.31229	7.23769	8.25821	8.32941	8.0959	7.52672	7.54521	7.9307	6.38533	7.46121	8.0069	5.86047	6.47665	6.0093	5.7761	6.91519	7.31244	7.07204
C6orf47	1.06307	0.0020349	0.0123958	9.35102	8.28795	9.83332	8.80553	10.1425	9.32091	9.98362	8.92176	8.84914	9.19796	9.67561	10.0438	9.83535	8.08499	8.63167	8.99301	8.61985	11.0883	9.39672	9.96613	8.65054	10.0002	8.98597	8.28124	8.40856	7.59122	7.41807	8.80838	9.22021	8.69561
C6orf62	0.676419	0.00912139	0.0353305	9.83445	9.15803	10.2729	8.93419	9.78402	9.68615	10.7645	9.35986	9.74422	9.02889	10.3988	9.61178	10.0025	10.3254	9.75266	9.72678	10.4197	10.2954	9.60492	9.23973	9.99768	10.0978	9.57542	9.02633	8.99357	8.24706	8.54151	10.1585	9.98114	9.73458
C7orf50	0.765611	0.00409696	0.020333	6.62383	5.85822	6.58638	6.56405	6.93214	6.79371	6.31682	5.92564	6.66387	6.00108	6.26533	5.75673	7.09675	6.86251	7.31745	7.56861	6.14452	7.89429	6.02826	6.41755	5.85716	6.9581	7.11596	5.57517	5.67305	5.51371	5.57588	6.39942	6.4121	6.65739
C7orf55	1.82764	2.45713e-05	0.000449753	8.83334	7.00571	9.52108	7.96884	8.63936	8.76988	7.97483	9.37981	10.046	7.94268	7.62671	8.96303	9.12972	9.349	10.3195	9.77423	8.51595	9.24166	8.70447	8.15611	7.44928	8.80803	9.38673	6.29647	6.95339	6.08087	6.21179	8.12721	8.36453	8.66674
C7orf57	1.79424	0.00338898	0.0178663	4.8876	3.09336	4.39285	2.62156	4.05634	5.04591	5.43854	5.7319	6.55037	5.0193	3.09734	4.26951	6.04266	7.31712	5.92225	4.70922	6.51099	2.43763	2.20412	5.17414	5.12311	5.61184	4.22284	2.23058	2.72839	3.63031	4.03878	2.59849	3.3336	6.02763
C7orf73	1.43505	1.25101e-06	4.48037e-05	8.55206	7.11701	8.31407	8.11726	8.30576	8.8517	7.44471	9.43469	9.06589	8.60232	7.50682	8.22973	9.24069	9.0347	8.58941	8.84042	8.90552	9.15165	8.32368	8.13593	8.23076	8.55387	8.61311	6.87121	7.05215	6.48293	6.71811	7.95851	7.61914	8.65255
C8orf33	0.58931	0.0442005	0.104839	8.34842	7.75911	8.25821	7.77231	7.36061	7.74132	7.95255	7.83469	9.13413	7.60851	8.69421	7.94173	8.78606	8.41027	9.46997	9.91207	8.68832	8.38794	8.02417	8.24186	7.94696	8.92496	8.93276	7.26257	8.04271	7.21547	7.52726	8.16999	8.33666	7.64169
C8orf4	5.34985	7.58613e-07	3.11617e-05	8.69908	3.34922	7.36073	7.8394	9.99145	9.349	9.2383	6.96015	7.87948	4.70646	11.1138	5.84308	9.61595	10.2815	8.11702	10.2195	11.8997	9.33862	11.2836	10.8347	9.29848	6.07152	8.19166	2.29756	3.49298	6.69916	3.29688	1.33485	2.97392	5.94557
C8orf59	1.06074	0.00382228	0.0193311	9.05899	7.99825	9.02889	8.93276	9.0027	8.7437	7.8962	7.86019	9.14871	9.63986	9.96537	8.08983	8.73137	9.64059	10.1574	9.99677	9.47093	9.49224	8.71807	7.87092	8.52496	8.88869	10.038	7.2086	8.10184	7.10515	7.41193	9.10624	9.05573	9.45953
C8orf76	1.53458	3.27436e-06	9.56799e-05	9.06734	7.53276	8.42466	8.22162	8.75344	8.91414	8.33472	9.16361	9.8547	8.98871	10.1072	8.64881	8.95995	8.76625	10.1231	9.60605	9.28819	8.56858	8.86169	10.4239	8.77578	9.05429	9.19268	7.15735	7.61943	7.03328	7.10177	8.31139	7.97334	8.44931
C8orf82	2.04214	2.44455e-06	7.67798e-05	8.1786	6.13646	8.39965	7.91897	8.30361	8.06828	7.78577	7.99149	9.28887	7.06692	8.03072	7.53094	7.89429	8.58447	10.1641	8.22864	7.87353	8.69263	7.45888	7.12517	7.00659	8.94917	8.97977	5.46145	5.64396	5.66417	5.50905	7.31625	7.22386	8.58673
C9orf114	0.675764	0.000449904	0.00409296	7.24222	6.56645	6.86932	6.87988	7.50922	7.67817	6.98848	6.9537	6.98346	6.76493	6.65437	7.06604	7.87966	7.44634	7.66806	7.30971	7.92753	7.70578	6.9793	6.86222	7.25717	7.20614	7.3089	6.10747	6.55585	6.63848	6.28912	6.736	7.0718	7.43036
C9orf142	0.74026	0.00726277	0.0302896	6.11047	5.37021	6.58812	5.47568	6.25116	6.20861	5.62443	5.83056	6.36744	5.46035	5.46897	5.71725	6.60366	6.621	6.43374	6.62555	5.23553	6.68484	4.92035	6.55732	5.4927	6.66229	7.05307	4.92298	5.33264	4.89124	5.21779	5.98035	5.87628	6.54776
C9orf16	1.1907	2.23483e-05	0.000415525	7.81185	6.62114	7.4108	7.68353	8.31059	7.18783	7.57727	8.14877	7.79152	7.18635	7.3889	7.73947	8.04837	8.76071	8.6123	8.54446	8.20073	8.47804	6.92243	7.9046	6.90443	8.00954	8.09841	6.44312	6.58793	6.6474	6.26633	6.80561	6.97647	6.95159
C9orf41	0.847391	0.0312874	0.0823865	7.05318	6.20579	7.73207	7.43573	6.88397	5.79806	7.17081	8.21045	7.50002	5.15413	7.14281	6.18113	7.44979	6.66573	7.98609	7.43521	6.65196	7.93479	5.76476	7.65004	5.38448	7.70992	7.71574	5.95887	5.75255	5.74119	5.71794	7.26404	6.80014	7.61224
C9orf89	0.642044	0.0133944	0.0460708	7.44043	6.79839	7.1674	7.03473	7.72211	6.99772	7.59984	7.72886	8.13425	6.4428	7.14248	7.81144	7.44928	7.9379	8.35156	7.6752	7.33251	7.19744	6.50048	7.87811	6.46283	8.21108	7.60821	6.14064	6.72531	6.67654	6.4837	7.08649	7.67765	7.30334
CA2	0.957853	0.0230207	0.0662449	6.09936	5.1415	6.32616	4.79788	5.62123	6.68049	5.47273	4.55321	4.97862	5.50456	5.63673	5.99466	6.36537	5.69604	6.02391	7.01166	8.1204	7.73934	5.45073	6.94928	4.97517	7.56775	5.68419	5.51044	4.82361	4.98064	4.68991	5.14895	5.69548	7.03576
CA8	0.703488	0.00195689	0.0120327	5.40358	4.70009	5.33598	6.6401	4.97931	6.28306	5.63772	6.14532	5.28038	5.03299	4.81793	4.80915	5.65701	4.83287	4.9708	5.93925	5.15778	5.409	5.69012	5.07273	5.46232	4.96212	5.37635	4.89265	4.55542	4.78133	4.6052	4.62396	4.74197	5.38641
CACNA1A	0.772208	0.00239532	0.0139951	5.94522	5.17301	5.75092	5.49681	7.48969	6.98298	5.43052	5.81098	5.7546	5.41615	5.82436	5.17035	6.07556	6.55974	6.22362	5.61518	6.07606	6.37143	5.78341	5.53841	5.41655	5.53352	5.85608	5.06848	5.20253	5.33335	5.03179	5.20283	5.19909	6.6179
CAD	0.686509	0.00156854	0.0102509	7.56208	6.87557	7.48159	7.65424	7.55446	8.56227	7.65472	6.71466	7.53687	7.70538	7.31429	7.00472	7.50645	8.17286	7.38325	7.71604	6.64707	7.92281	7.77416	8.07537	7.06754	7.31712	7.93618	6.42648	6.7456	7.01166	6.67359	7.11654	7.27954	7.66366
CALM1	0.680378	0.00034705	0.00340923	10.8339	10.1535	10.4019	10.9914	10.3013	10.8523	10.8417	11.0342	10.7893	10.5922	10.7462	11.4067	11.2092	11.2524	10.5534	10.7792	10.944	10.7238	10.8914	10.4805	11.052	10.812	10.8721	9.9895	10.3931	9.41655	9.53554	10.7283	10.8583	10.8189
CALR	0.719932	0.00190692	0.0118104	7.94244	7.22251	7.88431	7.57832	8.58703	8.51514	8.02402	7.05823	7.4859	7.85942	8.1632	7.45027	8.00453	9.08329	7.87743	7.76512	7.49824	8.36726	7.33867	7.82759	7.60024	8.31809	8.08193	6.86222	6.85718	7.11325	7.02948	7.80015	7.67279	8.3655
CAMSAP3	0.697569	0.00192584	0.0118897	5.8812	5.18363	5.86907	6.18226	6.24551	6.27897	5.2626	5.33654	6.03161	5.25734	5.23122	5.52208	6.41929	6.05155	6.43898	6.0461	5.3848	5.98767	5.31653	5.80786	5.29463	6.39942	6.76801	4.98616	5.02598	4.92179	5.07748	5.46325	5.62714	6.25438
CAMTA1	0.815043	0.000278446	0.00286975	9.60067	8.78563	9.55959	9.70205	9.29896	9.77073	8.64602	10.0098	9.58701	10.0244	9.08707	9.7397	10.3874	9.87087	10.381	9.98433	9.28099	9.82207	8.87453	8.75933	9.33322	9.68096	9.49547	8.6822	8.91519	8.86431	8.59764	8.67271	8.98172	9.91922
CAND1	1.06427	0.000373169	0.00358895	8.73917	7.67491	9.00603	8.5965	8.63205	9.3056	8.22906	8.79442	8.92075	8.68869	7.80737	8.19012	9.74818	8.97688	8.81433	8.81193	7.78703	8.29925	9.35231	8.50705	8.82474	8.66953	9.09921	7.08059	7.2586	6.92965	7.10864	9.0128	8.65915	9.20081
CAP1	0.659719	0.00244835	0.014207	11.4248	10.7651	11.0605	11.0902	12.2999	11.6988	10.9021	11.5873	11.449	10.8458	11.3986	11.1816	11.1779	12.2264	11.6805	11.2126	11.6914	11.5781	10.5839	11.6045	12.0219	11.6394	10.8595	10.8984	10.4219	10.4592	10.4239	11.3087	11.0787	11.5569
CAPG	1.8065	0.000269723	0.00280385	8.93318	7.12668	8.88458	9.3056	8.65288	10.2693	8.53155	7.82699	9.62521	7.00721	9.47045	10.1387	7.74458	8.57441	8.00453	9.00134	9.32724	10.8688	8.52262	10.2139	6.69754	9.97781	9.26106	7.23357	6.89439	7.1381	6.16524	7.60521	7.72358	8.62352
CAPN14	0.889473	0.00121173	0.00847581	4.48618	3.59671	5.05509	4.69018	4.12613	4.67281	4.45119	3.69536	5.15227	3.77459	4.20396	3.51668	4.76588	4.96718	4.3172	4.39475	4.49874	5.01595	4.1858	5.68998	3.71907	4.76598	4.8634	3.14056	3.10661	3.17542	3.51668	4.38088	4.2601	4.17381
CAPN5	0.96773	0.00111077	0.0079995	6.35351	5.38578	6.11771	5.94742	6.59456	6.68347	5.43118	5.90806	6.93312	5.37617	5.92	5.86165	7.93358	6.60845	7.27249	7.29159	6.13144	6.78811	5.96389	5.64695	6.26015	6.51618	6.62658	4.96222	5.27221	5.29314	5.18115	5.63652	5.96948	5.96459
CAPZA1	0.973916	2.51467e-06	7.82346e-05	11.0455	10.0716	10.7416	11.357	10.7792	11.2576	10.944	11.5714	10.9355	11.2595	11.1192	11.1522	10.982	11.1138	11.1258	10.8677	11.2595	11.4119	10.5227	11.2559	10.5873	10.944	10.7792	10.0893	9.81532	9.53803	9.43407	10.9586	10.5943	11.0342
CARD10	0.603221	0.0435125	0.103661	6.42841	5.82519	7.49773	5.75713	7.49432	6.62746	5.72404	5.81138	7.18827	6.13918	5.85317	5.41061	7.27437	6.31807	6.40616	7.05892	5.9703	6.61569	5.93207	6.86741	5.7916	6.80263	6.66339	5.22815	5.46877	5.48134	5.33761	6.53023	6.90506	6.22119
CARD11	0.849597	0.0100303	0.037747	6.38635	5.53676	6.43434	6.71156	7.39945	6.84511	6.36631	5.39732	6.75787	5.35755	6.95544	6.62785	6.24046	7.36061	5.65507	8.01164	5.26971	5.87804	4.99962	6.68504	6.30884	6.02661	6.28281	5.37662	5.3394	5.45762	5.23579	5.98035	5.83078	6.92855
CARD9	1.67239	0.000123072	0.00156178	6.77827	5.10588	6.53182	7.44471	7.10063	7.35633	8.03355	6.97316	6.93687	4.92469	7.25154	6.48276	6.48276	8.18426	7.78926	6.01062	5.42183	8.47078	5.0899	6.70458	6.06695	6.66512	7.04141	5.38551	4.86722	5.26059	4.71931	5.22948	5.17318	6.15851
CARM1	0.769841	0.0149598	0.0494982	6.26442	5.49458	6.94056	7.06455	6.86961	6.61418	5.35777	5.42017	6.39029	5.54325	5.15824	5.50417	6.55636	7.32723	6.78776	6.09188	5.94938	6.59786	5.40635	6.61832	5.43157	6.38978	6.90267	5.16713	4.85711	5.18295	5.17521	6.20887	6.37623	6.89537
CARS	0.859888	0.000736485	0.00587544	9.67062	8.81073	9.24452	9.83226	9.20627	10.0609	9.65572	8.83017	9.88492	9.79343	9.70491	9.19268	9.724	10.6224	10.2979	10.191	9.13784	10.1749	8.75581	9.68389	9.31378	9.67822	10.4624	8.58633	8.47696	8.58309	8.36281	9.46671	9.38848	9.3056
CASC5	1.26532	2.53233e-06	7.86155e-05	6.44236	5.17704	6.12242	5.92928	6.43856	7.1341	5.61184	6.02001	6.6666	6.3623	5.78723	6.43305	7.54186	7.09973	6.22158	5.77996	6.18759	6.66606	6.33059	6.66626	5.97393	6.93451	7.29121	5.44683	5.26149	5.29935	5.15215	5.07342	4.829	6.53332
CASP3	1.18492	0.000107028	0.00139852	8.48138	7.29645	8.65882	7.80349	8.58091	8.89402	8.19565	7.84324	9.30449	8.55509	8.22306	8.30765	8.74293	8.6973	8.29184	9.42163	8.02303	8.84556	8.08103	7.70735	8.309	9.61637	9.05356	7.58787	6.85053	6.56645	6.79835	8.2928	7.68273	7.43422
CASP8AP2	0.726356	0.00813025	0.03275	6.85339	6.12703	6.79313	6.31005	6.21916	7.13436	6.24401	6.74291	7.12414	6.03856	6.78096	6.09991	7.64728	7.39537	6.47045	6.75201	5.92062	7.6839	7.30171	6.32839	6.90594	7.72211	7.91168	5.89846	5.60566	6.02325	6.24917	6.78504	6.20059	7.24782
CBFB	0.744828	0.0108195	0.0398183	9.41119	8.66636	8.21266	8.97481	9.54078	9.46367	8.79257	9.49352	8.58236	8.70631	9.8212	8.81955	9.82891	9.74133	10.304	9.30851	9.38115	10.241	8.97912	10.0388	9.56656	10.673	8.91924	8.25821	8.63936	8.35011	8.02432	9.24706	9.47913	9.6572
CBLC	0.781481	0.00581814	0.0260252	6.32343	5.54195	6.66645	6.9361	7.12313	6.13938	5.57411	5.8365	6.40331	5.2769	6.2358	5.8366	6.3623	6.51853	6.50317	6.14384	5.85932	7.88096	5.54807	6.43603	5.54546	6.8582	6.91043	5.08184	5.34791	5.28917	5.36202	6.00629	6.16449	6.52098
CBLL1	0.681242	0.00219785	0.0131126	8.51695	7.8357	8.30796	8.76889	8.17286	8.29308	8.72462	9.18521	8.2618	8.32553	8.15103	9.46997	7.7682	8.54396	8.55268	8.09031	8.8517	8.55942	9.13716	8.21779	8.81564	8.38898	8.44745	7.85015	7.79839	7.12824	7.24728	8.39401	8.59615	8.33857
CBS	2.80333	9.71557e-10	1.64661e-07	9.6081	6.80477	9.01211	9.28372	8.87279	9.76427	9.76477	10.3267	8.01462	8.3549	9.84596	10.5785	10.1673	11.0702	11.0392	9.83702	9.44685	9.28318	9.12235	9.25256	9.61044	9.19473	9.20929	6.88614	6.37752	7.24284	6.47224	6.85256	6.99731	10.3267
CBWD1	0.648196	0.000929737	0.0070044	9.87449	9.22629	10.1072	9.70965	9.54797	9.85708	9.21671	9.94331	9.39202	9.64926	10.431	10.0529	10.1524	10.3712	10.4427	10.0263	9.67034	9.77273	9.99586	9.08951	9.55335	10.5622	9.62164	9.08707	9.38425	8.87552	8.9332	9.59546	9.48224	10.0734
CBX3	1.50797	4.02744e-08	3.33869e-06	11.1472	9.63923	10.9651	11.1557	11.03	11.2432	11.0681	11.5075	10.8952	11.5554	11.2726	10.9021	11.7683	11.5657	10.8677	11.0048	12.1927	11.3216	10.8994	10.3662	10.7336	10.6295	11.2688	9.66701	9.61412	9.17707	8.79567	10.3603	10.2213	11.0254
CCAR1	0.953241	0.000152873	0.00182707	10.2741	9.32089	10.3032	9.8547	10.1399	10.3254	10.045	10.0161	10.112	10.2639	10.2815	9.74818	11.3009	10.6326	10.4361	10.5227	10.0681	10.1631	10.0634	9.95212	10.2399	10.4665	10.3801	8.88592	8.40326	8.86169	8.98919	10.5721	10.2131	10.7154
CCAR2	0.857854	0.00611735	0.0268578	6.94077	6.08291	7.06243	6.6283	7.46308	6.73028	6.31876	6.37084	6.00038	6.9692	8.0733	5.97565	7.99576	6.64588	6.94336	7.64552	7.49106	6.97605	6.97327	6.20304	6.22405	8.40085	6.40366	6.03222	6.28995	5.46269	5.56769	6.60112	6.54379	7.20215
CCDC102A	0.644662	0.0243754	0.0689297	5.94451	5.29985	5.3877	7.02322	6.14045	6.5306	5.75226	5.06394	5.59477	4.92748	5.74924	5.53218	7.26507	6.42655	5.66244	5.83233	5.31827	5.87879	5.78395	5.92578	5.92486	6.32349	5.85774	4.62704	5.12772	4.9227	4.99063	5.83452	6.29647	6.87807
CCDC113	1.99184	1.47349e-05	0.000303725	7.33001	5.33816	6.51376	6.01509	7.92258	7.4023	8.06024	7.38079	5.40246	6.58614	8.02679	6.589	7.61587	8.15475	7.78419	7.88398	8.02402	6.21589	7.99576	6.24476	8.16999	8.21585	6.85235	4.33498	5.53611	5.15866	4.83343	5.26754	6.89826	8.20362
CCDC114	1.00516	0.00227105	0.0134372	5.26739	4.26222	5.32072	5.08856	4.81406	5.42624	5.07949	4.40301	5.87073	5.19469	4.66724	5.10967	6.11394	5.21314	6.00197	6.22308	5.60977	4.5241	4.16996	4.60633	5.12644	4.8955	5.57953	3.81176	3.83607	4.5327	3.56432	4.22284	5.60566	6.84435
CCDC12	1.19275	8.05144e-06	0.000191295	9.17013	7.97737	9.88114	9.44969	9.22729	9.33194	9.41785	8.90413	9.22729	9.33501	8.62137	8.79567	9.19233	8.76124	9.78294	9.70323	8.48116	9.77684	9.18323	8.74327	8.44618	8.96917	9.8547	7.91641	8.10419	7.19211	7.46648	8.3655	8.81955	8.65713
CCDC137	0.983373	0.000275828	0.00285305	6.65903	5.67566	7.44532	6.11957	6.85273	6.82982	6.10046	6.75947	6.95159	7.12824	6.51608	5.80253	6.98701	6.88549	6.88571	6.96387	6.66377	6.5685	5.7726	6.9047	5.45399	6.71872	7.78393	5.19692	5.5703	5.54687	5.351	6.25546	6.13339	6.4046
CCDC167	1.13072	0.000280145	0.00288596	7.7058	6.57509	9.53275	7.60338	7.7837	7.64075	7.61029	6.71746	7.4522	7.85358	7.57133	6.83863	8.63552	7.541	7.40009	7.16381	7.92258	7.51951	9.01647	7.161	7.84762	7.73689	7.94646	6.71266	6.96945	6.03882	6.2949	6.62515	6.80953	7.03268
CCDC22	0.819564	0.00369465	0.0189198	6.43876	5.61919	7.31902	7.09425	6.43957	6.3107	5.83822	5.66051	6.93214	5.72353	6.40127	5.55701	6.8856	6.77993	7.07322	7.06455	5.62849	6.5849	5.94374	6.21852	5.46207	6.74125	7.42885	5.59392	5.52256	5.24996	5.16	5.96862	6.22008	6.56529
CCDC23	1.11076	0.000571498	0.00489	8.6147	7.50394	8.97364	8.68062	9.31195	9.26844	8.14665	8.14707	8.50973	8.57022	8.55595	7.18415	8.50516	9.1588	8.64769	8.9941	9.78802	8.3234	8.54446	7.38792	8.47294	9.21185	8.41403	6.97418	7.72764	6.66061	6.79616	8.25922	8.60581	8.72652
CCDC34	1.6976	0.000296536	0.00301337	7.97601	6.27841	8.54477	8.62525	7.91936	9.43934	7.5888	7.66319	7.53621	8.1518	7.52911	5.31688	9.23516	8.55768	9.97529	8.342	7.18853	6.74701	6.79656	7.83482	7.65622	8.61428	8.43183	5.48589	6.07207	6.4897	5.82512	6.84701	6.95066	7.77813
CCDC43	0.711084	0.017456	0.0547183	9.44425	8.73317	10.338	8.98172	9.88944	9.76627	8.97977	8.42938	8.88348	9.79266	10.0567	8.51972	10.0034	9.41655	8.71957	9.37709	10.3565	8.70447	9.85558	8.74681	9.56968	9.67915	10.2131	8.66674	8.59796	7.89352	8.08544	9.6112	9.54417	9.49469
CCDC47	1.11335	2.50973e-06	7.82325e-05	10.9033	9.78994	10.7107	10.7394	10.246	10.297	11.1258	11.6187	11.2126	10.7736	11.1686	11.2866	11.1243	10.5227	10.8661	10.7273	11.3827	10.5477	11.0974	10.8677	10.8535	11.0289	11.2227	10.0474	9.66286	8.97481	9.25864	10.3335	10.4624	10.4522
CCDC58	1.07712	0.000733227	0.00585558	6.56368	5.48656	7.0869	6.78096	7.70814	6.52719	6.35154	5.60039	6.44785	6.08243	6.38733	6.03957	6.95089	7.48133	6.83371	6.66743	4.91832	6.63859	6.12063	7.30615	5.54968	7.07716	6.78651	4.76132	5.83697	5.58418	4.93647	5.94304	5.8574	7.05823
CCDC59	0.989387	4.16949e-05	0.000676582	8.79191	7.80253	9.55642	8.51719	8.70153	9.12522	8.79184	8.38431	8.73137	9.41281	8.70153	8.32111	9.10624	9.49173	9.15388	8.15774	8.018	8.37215	8.77871	8.05875	9.13716	8.57461	9.00696	7.50889	7.47667	7.52016	7.74338	8.38917	8.17689	9.32283
CCDC6	1.48176	0.0018819	0.0116963	10.7757	9.29399	12.1176	10.804	10.4908	9.41849	10.4146	10.1362	11.7534	9.04726	11.8997	10.4185	10.9403	10.488	11.2951	10.8503	11.3808	10.7555	9.99845	8.9986	13.7903	9.87714	11.0065	9.03988	9.09558	8.92636	9.10624	9.86541	9.73048	11.1849
CCDC64B	0.597088	0.000373055	0.00358895	5.99777	5.40068	6.16083	6.4481	6.02994	6.01238	5.55928	5.81158	6.19038	5.83308	5.84856	5.51052	5.94023	5.93538	5.98378	6.22192	5.59263	6.68634	5.46567	6.3107	5.79591	6.64396	6.00531	5.0391	5.44274	5.45652	5.4666	5.34008	5.65903	5.96439
CCDC77	1.10015	0.00269212	0.0152126	7.05849	5.95834	6.88697	7.4108	7.04948	8.50025	6.5757	6.46692	6.15176	7.57051	6.44748	5.45732	7.82298	6.83256	7.22723	7.23656	8.30515	6.17759	8.89857	6.48413	6.89993	7.17753	6.61438	6.04118	5.52625	5.76838	5.47941	6.49987	6.43494	7.09303
CCDC85B	0.817093	0.0166541	0.0530779	6.66378	5.84668	6.88883	7.70521	6.87807	6.49987	6.80042	6.14623	7.29078	5.68807	6.25994	5.54375	6.63572	6.76286	8.40146	7.49423	5.45175	6.82375	5.51087	6.85925	5.75498	7.04593	7.35925	5.4981	5.70123	5.53787	5.41217	6.2754	6.65534	6.80188
CCDC88C	0.934918	8.21317e-05	0.00113889	6.11791	5.18299	6.13908	6.52597	6.16203	6.05883	7.30262	5.33803	5.52433	5.39743	5.57248	5.96579	6.87465	6.8542	5.60891	6.33577	5.97134	6.27201	5.86576	5.84079	6.3327	5.99389	6.37715	5.39295	5.14617	5.17775	5.07139	5.10737	5.20231	6.28022
CCDC91	0.703873	0.0191819	0.0582767	8.42379	7.71992	7.51333	8.04727	8.65915	9.53693	8.21064	7.82065	7.47113	7.9755	8.70879	7.33919	8.98388	8.58703	8.15611	9.16198	8.37998	8.24808	8.78559	9.0413	8.7602	9.10424	8.42432	7.9029	7.17262	6.66222	7.30273	8.78426	8.49476	8.40806
CCL20	2.33038	0.000363267	0.00352396	6.85692	4.52654	5.43429	9.66471	7.57535	9.48436	6.65729	5.63037	7.48743	5.06891	6.84377	4.4921	6.78108	5.78967	7.75351	6.71365	6.48583	7.70051	4.83966	7.95689	6.56529	6.20357	9.16884	4.55259	3.90916	5.95725	4.23321	4.29036	4.21664	6.55507
CCL28	1.11336	0.00100533	0.00744159	6.67682	5.56346	6.0249	6.68315	7.54186	7.64637	6.09765	7.53956	5.84062	5.62705	6.00412	6.20705	7.0482	6.54893	6.26779	7.78023	6.2027	8.24671	6.07411	5.8384	6.6332	7.65967	6.46206	5.50686	5.44969	5.63749	5.54656	5.78438	5.45575	6.91568
CCM2	1.20005	0.00103382	0.00759842	9.11186	7.91181	9.09092	9.04168	9.34576	10.2513	8.67147	10.0329	9.36678	8.06066	8.8233	9.18572	9.67195	9.68845	9.05388	9.55186	9.17707	9.895	7.70913	9.3327	7.27437	8.96388	8.9451	7.9918	7.24705	7.33976	7.06026	8.68423	9.14776	9.32702
CCNA1	2.18915	0.00502132	0.0235281	8.86792	6.67877	11.1816	8.69848	9.80352	9.45123	8.47696	8.96081	9.95512	6.95299	9.28476	5.84406	6.10804	6.8922	11.401	9.88019	11.748	11.2627	7.0869	5.7144	9.5246	9.78461	8.71119	6.6347	6.46884	6.88897	7.65854	6.31388	6.1077	8.3709
CCNA2	1.93287	1.18487e-08	1.32562e-06	8.13334	6.20047	8.24284	6.985	8.07437	8.03689	8.27873	8.20318	8.19513	9.08853	7.59013	8.09233	8.40176	8.19245	8.00991	7.54311	8.20804	7.63971	8.21779	9.06065	7.49188	8.97766	9.07461	6.67257	5.94952	6.69091	5.99518	6.30815	5.5865	7.32882
CCNB1	3.1025	2.36383e-11	7.3087e-09	9.1467	6.04421	9.80021	9.55902	8.55908	9.38024	8.33434	8.11068	8.51133	9.42867	9.49102	7.82444	9.83702	9.18323	9.20706	9.77488	9.27769	8.03621	9.6622	9.66776	8.31539	9.29945	10.2913	6.41042	5.63196	6.16266	5.23356	6.66462	6.16203	9.67626
CCNB2	2.46688	9.14904e-11	2.2074e-08	8.01304	5.54616	8.21749	7.59896	8.34558	8.52357	8.04789	7.38008	8.87821	8.24284	7.09927	7.5815	8.57421	9.15107	8.15696	7.26219	8.36418	7.94154	7.40707	8.09748	7.36166	8.05591	8.81389	5.94527	5.23227	6.02963	5.19267	5.66764	5.2095	7.18531
CCND1	2.25025	0.000236486	0.00254626	9.29392	7.04367	7.23493	10.1436	8.88638	8.34699	10.4978	9.7435	9.75402	9.40972	9.61803	9.22021	12.6243	10.1399	9.73458	7.9303	8.62085	9.49607	7.91703	8.63205	9.03273	9.86768	6.73161	6.79942	7.3669	7.70303	6.00848	6.03006	8.35413	10.884
CCNE1	1.50568	0.00117372	0.00829362	8.78058	7.2749	8.92314	8.65848	10.0047	10.6309	6.93275	8.06024	8.52054	8.00477	9.22964	7.7876	9.39735	9.91415	8.6968	8.9844	8.9844	8.97977	7.98485	9.25372	7.05778	9.18085	9.92007	7.2693	7.37211	8.94965	7.52994	6.3822	6.14623	8.06588
CCNE2	2.13735	1.76369e-07	1.0216e-05	7.01366	4.87631	6.82585	5.85062	6.12497	6.22518	5.78364	6.70222	7.10316	6.84218	6.61832	8.18112	8.00621	6.65795	7.98415	6.89547	6.62457	6.8312	6.79371	7.98464	6.64049	8.40838	7.88597	5.3394	4.57409	5.17056	4.70847	5.08743	4.3779	7.3306
CCT2	1.44174	5.17017e-08	4.09622e-06	11.5653	10.1236	11.7051	11.3849	11.7738	11.7588	11.5657	11.6078	11.602	12.2678	11.3704	10.9986	11.6724	11.7907	11.9034	11.2359	11.368	10.8809	12.3549	11.4954	11.3087	11.0048	11.6854	9.57682	10.1842	9.53693	9.66408	10.9224	10.8572	11.7023
CCT3	1.44506	1.55357e-08	1.63054e-06	11.831	10.386	11.766	12.2498	11.7839	12.0403	11.7263	11.2283	11.8174	11.9097	11.9728	10.9455	12.0775	11.6158	12.2678	12.2957	11.3365	11.9577	12.2051	11.5212	11.8117	12.088	12.0325	10.0312	10.4019	9.895	9.81982	10.9605	11.2073	11.6331
CCT4	0.633543	0.00332924	0.0176507	11.1972	10.5637	11.1522	11.7236	10.7926	11.2714	11.2126	11.03	11.5415	11.0995	11.432	10.9403	11.8599	11.3986	10.5064	11.247	11.4249	10.8635	11.6257	11.1322	10.8523	10.4945	11.5569	9.98572	10.8233	9.97685	10.0388	11.1281	11.4293	11.1816
CCT5	0.876621	6.1632e-05	0.000916742	8.85771	7.98109	8.513	9.16468	8.75862	8.8751	9.11252	9.06211	8.98919	8.53036	8.547	8.20714	8.35743	8.63694	8.78226	9.2927	10.1893	8.77948	9.20987	8.7276	9.26844	8.37515	8.86591	8.37623	8.10684	7.94863	8.18493	7.66748	7.60242	8.62478
CCT6A	1.09614	5.24196e-06	0.000135765	10.9786	9.88248	11.1487	11.0787	10.9898	10.8595	11.1663	10.9986	11.1686	11.1243	11.5586	10.5034	11.8262	11.4802	10.1749	10.9759	10.8824	10.9707	10.9143	10.2565	10.6326	10.4185	11.401	9.66838	10.1143	9.35292	9.2979	10.4522	10.4092	11.0001
CCT6B	0.927472	4.94917e-05	0.00077768	7.33365	6.40618	7.17875	7.3304	7.55469	7.70521	7.2171	7.72211	6.95922	6.95359	6.92153	6.9628	7.9644	7.73414	6.80475	7.90842	7.85535	7.45829	7.32517	6.55104	7.57547	6.47988	7.87712	6.35746	6.33973	5.97515	6.15637	6.82525	6.78309	7.30086
CCT7	1.14913	1.26906e-06	4.52276e-05	12.0624	10.9133	11.9786	12.2361	11.5239	11.9786	12.1244	11.9891	12.2549	12.3859	12.0738	12.3902	12.4171	12.3171	11.6609	11.9728	12.5229	11.8659	12.6922	11.5482	11.583	11.5901	12.2746	10.9972	10.3724	10.3371	10.4472	11.5259	11.8	11.9931
CCT8	1.11354	1.05965e-05	0.000235021	11.407	10.2935	11.2816	11.6476	10.8795	11.092	11.3609	11.6451	11.6779	11.3235	11.4621	11.1911	11.3295	11.602	11.5284	11.88	11.7185	11.778	11.0819	10.7792	11.3322	11.3766	11.7738	9.7593	10.2522	9.32747	9.76917	11.2036	11.449	11.2126
CCZ1	0.957906	0.000333008	0.00330265	10.4245	9.46658	10.1127	10.2729	10.2903	11.0438	10.246	9.92514	10.2222	10.4263	10.4647	9.82074	11.157	11.0773	10.7699	10.6023	10.2306	11.4249	10.046	9.63379	9.91517	10.2826	10.8052	9.28099	9.32422	8.7475	8.80339	10.4128	10.2306	10.5693
CD24	3.34664	7.46856e-07	3.09888e-05	12.2748	8.92821	12.8417	8.68028	11.9409	11.6394	12.4996	12.718	13.1111	12.2498	11.6805	13.1235	12.8948	13.0255	11.935	11.8262	13.0996	13.5285	13.6073	11.157	11.6313	12.2471	12.6243	9.19376	9.53192	11.1686	9.94908	6.68252	7.04334	11.9851
CD2AP	1.23665	4.85384e-06	0.000128835	9.93928	8.70263	10.4933	8.94139	9.47546	10.0365	9.40409	9.77799	9.84263	9.74818	9.83226	9.98362	10.4821	10.4933	9.25864	9.5815	10.1443	10.099	9.9159	10.2575	10.581	10.0168	10.1562	8.57856	7.62472	8.64602	8.64151	9.77423	8.95073	10.1425
CD320	0.871886	0.0010935	0.00790502	8.54978	7.67789	8.66168	9.22493	8.77985	9.15824	7.58487	8.03199	8.12589	8.93228	8.24015	7.90258	9.14005	8.27045	9.73351	8.70751	8.39986	7.63678	8.67362	8.87096	7.82477	8.45498	8.7079	7.06712	7.93226	7.3878	7.55384	8.01664	8.10968	9.03222
CD46	0.768645	0.0114306	0.0413949	9.95344	9.18479	9.38908	10.0034	9.20534	10.0707	9.57321	10.1347	10.2954	8.27473	9.89606	10.1425	10.5583	10.0319	9.61746	10.314	10.4	9.81388	9.57172	10.112	10.8503	10.1399	9.91299	8.73169	8.50516	8.51944	8.7036	10.6391	10.0098	10.6683
CD47	1.48833	3.0406e-10	6.26748e-08	11.4598	9.97142	11.7945	10.9727	11.7588	11.4976	11.7083	11.3664	11.4722	11.2508	11.5361	11.8549	11.5163	11.2368	11.1686	11.2663	11.7236	11.5873	11.4474	10.6981	12.1351	11.2806	11.3849	9.91415	9.74875	9.71167	9.47598	10.5952	10.3828	11.4573
CD69	1.27623	0.0204233	0.0606943	6.75259	5.47636	7.02503	6.64969	7.42587	8.32052	7.60036	6.67368	6.63075	3.26086	6.30028	6.4772	7.83259	6.44519	5.10535	6.52976	8.28167	6.19153	4.95514	8.67863	6.48341	7.02634	8.41367	5.80399	4.76	6.50389	5.39866	6.0522	4.33943	6.24944
CD82	1.50815	6.50398e-05	0.000951478	7.37837	5.87022	7.03602	8.27078	6.70939	6.99527	7.59374	7.67708	8.25351	5.62381	7.17931	7.65409	7.67585	7.80533	7.1687	7.50002	6.40847	8.02228	6.04843	7.32185	8.25131	8.56132	8.08905	5.8885	5.35591	5.54558	5.57248	6.67175	6.1871	6.47847
CD9	1.309	0.0011914	0.00838227	11.0004	9.69135	9.07014	11.8354	11.1539	11.628	11.9292	11.778	10.6368	9.83468	11.7534	11.7185	11.1425	9.81054	10.6164	11.3154	11.6805	10.7427	11.0605	9.574	12.0269	11.1964	11.0438	9.41592	9.95332	8.57256	9.17958	10.4139	10.6128	10.4602
CD97	1.24382	0.00129797	0.00894508	6.71793	5.47412	6.65267	6.83405	7.16763	7.60758	6.38232	5.1607	7.09018	5.64605	6.2196	5.91595	6.63919	7.61483	7.04378	7.45611	6.07457	6.58064	5.50056	7.51121	6.47037	7.00927	8.74132	5.6608	5.00031	4.87483	4.88198	6.23447	6.19231	6.47588
CD99P1	0.760949	0.020048	0.0600291	6.79247	6.03152	6.52098	7.28246	7.32723	6.28669	6.58793	6.68432	8.39173	5.98292	6.57669	8.42979	6.2151	6.75947	7.60891	6.02654	6.04656	7.39755	5.75592	6.5998	5.7092	7.38717	6.89262	5.92518	5.89115	5.97655	5.78246	6.65149	5.96229	6.96472
CDC123	0.614608	0.00624915	0.0272953	10.3376	9.72297	10.1476	10.6564	10.35	11.0187	10.718	9.40409	9.82641	10.1953	10.1269	10.0133	10.0734	10.244	11.1332	10.1758	10.5189	10.4445	10.7362	10.015	10.9503	10.3543	10.8661	10.4553	9.91657	9.76427	9.5246	9.40359	9.2735	9.45831
CDC20	3.72326	1.55917e-11	5.24613e-09	9.89191	6.16865	9.76825	9.62092	10.9298	10.1853	8.20762	10.0618	9.62092	10.1801	10.4361	8.42113	10.0688	11.6232	10.5076	9.32238	10.1532	10.4229	9.21709	9.82312	9.1135	10.4092	10.3073	5.71985	5.46156	7.64043	5.58456	6.42794	6.17759	9.22196
CDC25A	1.78159	2.57475e-07	1.36261e-05	6.76336	4.98177	7.77255	7.34849	7.21684	6.54102	6.51981	6.1133	6.65548	6.78734	5.6965	6.37469	7.86598	6.77244	6.76955	6.94627	5.95553	6.54902	6.71274	7.78001	5.38184	6.94733	7.3583	4.58236	4.9729	5.44747	4.86623	4.75865	5.26302	6.72887
CDC25B	0.83892	0.0235935	0.0673092	9.37827	8.53935	10.1812	10.112	10.1812	9.21246	9.5623	8.36849	10.2497	9.86625	8.37841	8.15626	10.0085	9.14333	8.85979	9.43865	8.69001	8.88638	9.03581	9.81461	7.91641	11.4621	9.44406	8.73787	8.10366	8.35459	7.74082	9.14431	9.15487	9.35411
CDC34	0.785846	0.00527324	0.0242885	7.29229	6.50644	7.54744	7.8299	8.21266	7.45383	6.67473	6.92334	7.08323	7.59262	6.81851	6.23382	7.86418	7.64133	8.36453	7.24485	6.94907	7.23036	6.1871	7.66832	6.56968	7.69275	7.46072	5.95479	6.5571	6.15327	5.98229	7.01356	7.37763	7.18734
CDC37	0.752026	0.00394463	0.0197924	7.78801	7.03598	7.29691	8.91794	8.13047	8.66706	7.461	6.90317	7.10187	7.63219	6.94606	7.60085	8.06279	8.39336	8.37938	7.24876	8.00453	8.04001	7.58854	8.2926	7.43406	7.45243	8.13425	7.29617	6.82873	6.39441	6.82825	7.2293	7.63902	7.64786
CDC42EP4	1.14635	0.000441476	0.00403898	8.61894	7.47259	9.05861	7.19853	9.55766	9.11754	8.02804	8.55942	9.0706	8.5006	9.57947	7.84475	8.46002	8.14285	8.92459	8.92269	8.83862	8.65421	8.30182	8.2689	8.29782	8.8017	9.80674	6.71454	7.29733	7.07578	7.37319	7.67493	8.69977	7.68149
CDC42EP5	0.649512	0.0212726	0.0624556	7.48449	6.83498	8.00358	7.21952	8.38177	7.27645	7.48159	7.3545	8.41121	6.90558	6.95159	7.44543	8.93149	6.99609	7.14214	6.5154	7.19267	8.01819	6.98264	7.18617	7.78242	6.82197	7.90534	6.18995	6.77711	6.57023	6.49854	7.17974	7.79432	7.75311
CDC42SE2	1.22762	0.000295791	0.00300921	9.18372	7.9561	9.27595	9.58839	9.54195	9.5061	8.82474	8.40326	9.81741	7.62894	9.47283	9.4549	9.27468	9.17122	8.97688	10.1443	8.86363	9.00965	8.22134	8.93671	8.59304	9.84669	9.64983	7.87385	7.74231	7.02766	7.05653	8.94426	9.09201	9.83952
CDC45	0.953933	0.000127954	0.00160241	6.50837	5.55443	6.79331	6.0608	6.60831	6.1858	5.9857	5.95725	6.29779	6.60035	6.08483	5.93847	6.74752	6.65472	7.25028	6.03101	7.05347	6.90267	6.76378	7.45284	5.72312	7.17202	7.05265	5.82398	5.50927	5.85483	5.56901	5.29424	5.27527	5.86735
CDC5L	1.10273	0.000420353	0.0038983	8.79903	7.6963	9.40409	7.93516	8.41664	9.09606	8.09306	8.51972	8.35905	10.5583	8.19086	8.32553	8.92314	8.89813	8.65288	8.41434	9.10536	8.67626	9.98362	8.55737	9.25492	8.58396	8.44181	7.54614	7.33788	7.09312	7.28732	8.5038	8.40955	9.18841
CDC6	1.51345	1.11615e-05	0.000243215	6.0915	4.57805	6.82327	5.17094	6.09976	6.35883	5.35808	5.21768	5.79982	5.8718	5.87886	5.0192	7.21924	6.59219	6.40165	5.80466	5.93794	5.52802	6.22969	7.99121	5.79103	6.27259	6.81066	4.6616	4.27467	4.47948	4.76866	4.64712	4.63678	5.83589
CDC7	2.73777	3.22894e-08	2.80905e-06	8.85397	6.1162	8.89089	8.22471	8.64473	9.16144	7.75497	9.12934	8.59304	10.1443	7.70202	8.06279	8.83293	8.04529	8.39965	8.44151	9.42039	7.45148	10.0409	9.46671	8.39729	10.8535	9.43293	6.3536	5.34351	5.84079	5.94071	7.19071	6.02786	9.69648
CDC73	0.596592	0.00402265	0.0200606	8.2926	7.69601	8.18527	8.11038	7.74338	8.19299	7.74368	7.86226	8.15103	7.88707	8.20407	7.35692	8.5256	8.23718	9.27595	9.15338	8.30552	8.49106	8.29563	8.55268	8.43345	8.71004	8.52096	7.18635	7.59431	7.71604	7.89178	8.02373	7.76383	8.49868
CDCA3	1.17214	0.000674592	0.00553817	8.91679	7.74465	8.7105	8.25821	9.2495	9.68794	9.01873	9.14644	7.98907	9.8562	8.45169	8.49714	9.95512	9.26696	9.12287	8.77717	8.92352	7.99836	8.95643	9.32091	8.67804	8.75142	9.14669	8.71515	8.25284	8.65178	8.21452	6.4499	6.18373	8.40641
CDCA4	1.37434	3.22963e-07	1.62883e-05	8.55954	7.1852	9.01063	9.15271	8.45542	7.94386	8.07762	9.04977	8.40543	8.91152	7.97267	9.03161	8.14556	9.54482	8.57584	7.63268	8.56087	8.53155	8.16573	8.69594	7.91467	8.9447	8.76889	6.88488	6.93619	7.64868	6.97789	7.29733	7.36621	8.81736
CDCA5	2.96953	6.45059e-11	1.67715e-08	8.62193	5.6524	9.2356	8.19858	8.52096	8.85553	7.91832	8.1518	8.9422	9.34623	8.87189	7.54764	9.07766	9.16468	9.32283	8.43261	7.53802	8.59683	8.30016	9.81388	7.10246	9.46671	9.34336	5.87483	5.3883	5.97001	5.1467	5.77354	5.76101	7.93448
CDCA7	1.80396	5.5615e-07	2.45177e-05	7.0693	5.26534	7.18827	6.78309	6.39242	6.7421	6.77354	5.85498	6.82952	6.41224	6.62128	7.90842	7.51049	8.07594	7.58382	6.43473	6.75975	6.46129	7.19364	8.69334	6.96387	7.86598	6.68578	5.36428	5.21323	5.80506	5.019	5.14115	5.0493	7.79012
CDCA8	1.6395	1.11654e-06	4.11375e-05	8.55647	6.91697	8.28638	8.02691	10.944	8.55209	8.04595	8.4126	8.47629	8.51133	7.98262	8.06867	8.6027	9.48368	8.53036	8.03166	8.64834	8.91826	8.6977	7.9455	8.43732	8.98871	8.54508	7.19598	6.92607	6.58125	6.74108	7.04742	7.01001	8.10614
CDH1	1.35989	0.0012075	0.00845997	10.9959	9.63603	10.0805	11.0065	10.804	10.8784	10.8809	10.738	10.7362	9.56791	11.5284	10.5419	11.8741	10.7656	11.0714	11.5009	10.8688	11.0819	11.0588	10.9803	11.7132	12.01	10.1928	7.86089	8.52811	9.6074	9.01379	11.6078	11.1982	12.0295
CDH5	1.59667	0.00109068	0.00788707	5.95695	4.36028	6.01596	5.64072	5.40986	7.74568	5.06999	4.54552	6.94181	4.56989	4.0079	5.69548	7.58063	5.9186	6.6568	7.31943	4.74014	5.76501	5.12963	7.78473	4.96057	6.26303	6.68675	4.18846	4.28109	4.50173	4.31351	4.26535	4.61156	6.60479
CDK1	2.53947	3.58254e-07	1.74273e-05	9.59273	7.05326	9.42355	9.18048	9.26106	9.43293	8.84757	9.32476	9.45887	9.61595	8.69513	8.86764	10.4172	9.55335	10.1143	9.10948	9.36678	8.77491	9.45123	10.1072	12.8659	9.6128	9.96434	7.94115	7.02948	8.14998	7.22474	6.34478	5.62944	9.59472
CDK16	1.08267	0.00107087	0.00778911	7.5833	6.50062	8.76988	7.44187	7.30433	6.86222	7.11421	7.51049	8.07874	7.19255	7.58513	6.93516	8.73202	8.17319	7.20004	9.2555	6.99029	8.51101	6.64588	6.90317	6.74493	7.96713	7.89853	6.54697	6.70154	6.39837	6.57231	6.36081	6.42372	7.01621
CDK17	0.672263	0.00503245	0.0235658	8.74525	8.07299	8.84399	8.85149	8.52428	9.08894	8.86474	8.59145	8.99599	8.91645	9.57819	7.66141	8.45092	8.92815	8.52375	8.18913	8.39931	7.90982	9.21865	8.89041	9.16468	8.41334	9.07954	8.34762	8.24671	7.15331	7.53251	8.57381	8.58396	9.31088
CDK2AP1	1.39664	1.00805e-07	6.57096e-06	12.636	11.2394	12.4461	12.435	12.3732	13.0162	12.583	13.0255	12.4673	12.8869	12.565	12.565	12.5311	13.4153	12.6823	11.8399	12.1593	13.1111	12.6538	12.1244	12.742	13.2299	12.4554	10.9156	11.3849	10.7129	10.5064	11.8923	12.0244	12.6855
CDK2AP2	0.838664	0.00916151	0.0354199	7.07835	6.23969	7.32088	7.54347	7.21993	7.2508	6.39641	6.30565	7.53144	6.28843	6.38733	6.14824	7.58476	7.07314	8.50745	7.74243	6.1641	7.66806	5.67333	7.54158	6.59332	8.01099	7.70202	5.9291	5.67552	6.41322	6.45345	6.40831	6.55853	7.07005
CDK5RAP1	1.03784	0.00195154	0.0120238	8.76482	7.72698	10.0634	8.55595	8.8751	9.12185	8.0733	7.84655	8.41367	9.18521	9.25372	7.78183	8.84914	9.07714	8.3067	9.0696	7.50987	8.77115	8.58561	9.34517	8.00207	8.7257	10.4445	7.24782	7.59097	7.27038	7.36776	8.29861	8.58633	8.96882
CDK8	1.09114	0.00140802	0.00952273	8.13846	7.04732	8.05	9.24221	8.11134	8.03252	7.52241	7.99009	8.53793	7.3455	8.70496	8.23972	8.69848	8.66361	8.25055	8.14285	7.51238	9.25192	8.35628	7.4738	6.48949	8.05238	8.52357	6.69953	6.81753	6.2686	6.23253	8.49841	7.76731	7.85417
CDKN2A	1.67999	0.00506887	0.0236743	7.56049	5.88049	7.84038	9.16361	8.7252	8.85394	5.56018	7.47874	7.8483	5.50742	7.92222	8.97026	8.29337	8.30128	5.60508	7.56775	7.8299	9.85786	5.35755	6.10785	5.26449	8.95073	7.9551	6.26384	5.37754	6.13327	5.82034	5.83606	5.85192	7.36949
CDKN2AIP	0.774111	0.0241849	0.0685604	7.45625	6.68214	7.35387	7.14949	7.35864	7.53516	6.46244	6.42953	8.97977	6.62545	7.06044	7.38325	8.27252	7.72958	7.68273	8.40838	6.26429	8.07537	6.91052	6.87359	7.36814	8.4353	7.91364	6.44764	6.57137	5.76758	6.02593	7.58038	7.69992	7.76536
CDKN2B	0.963515	0.0331481	0.0858996	5.97188	5.00837	5.8804	6.50024	6.77112	6.82781	4.61329	5.45762	7.09283	4.43661	6.41363	7.06405	6.27142	6.31727	4.82673	5.49842	5.46432	8.39273	4.56445	5.39265	4.21407	7.04452	6.14807	4.27772	4.51	5.17521	4.93176	5.59722	5.5583	6.18918
CDKN3	1.91141	1.06918e-06	3.97123e-05	7.26398	5.35257	8.25853	6.96719	7.59767	7.41513	6.38811	6.80506	7.19661	7.23903	6.50669	7.35091	7.35387	7.04593	8.96736	7.4907	6.47419	7.44411	5.99542	8.13377	5.73996	7.78528	8.14606	5.60805	5.10384	5.52063	5.14738	5.69141	5.04412	7.50599
CDR2L	1.26751	0.00634433	0.0275914	8.14429	6.87679	8.49795	6.87254	9.83766	7.44439	7.60113	9.31112	9.64983	8.27163	9.0663	9.19233	7.8483	7.50139	7.17902	7.77712	8.03897	8.88973	6.86682	7.85114	6.64396	9.24901	9.07909	6.46606	6.3027	6.33819	6.52719	7.50511	8.12147	6.50505
CDS1	1.32535	0.000824024	0.00639515	8.27127	6.94592	7.61507	8.20954	7.50964	8.07914	8.69561	10.3003	8.50298	7.37496	6.46592	7.52536	9.02761	7.8732	8.1877	8.88208	9.21246	8.43634	7.5042	8.63885	8.14556	8.9844	8.30254	6.11124	6.45506	6.46386	6.76471	7.68618	8.19444	8.49443
CDYL	0.755097	0.00148855	0.00988909	8.3569	7.60181	8.92459	8.14285	8.71888	8.89041	7.83045	7.41018	9.02889	8.53818	8.61491	7.97969	7.98057	8.40406	8.45814	7.91467	9.36354	8.20073	9.06542	7.60381	8.26778	8.42917	8.12766	7.51605	8.05734	7.20807	7.34814	7.63649	7.84475	7.95729
CEBPG	1.8535	1.03605e-05	0.000231492	8.19674	6.34324	8.62525	7.84177	9.09921	8.73638	6.70044	6.76556	7.75497	7.98773	7.32239	8.24134	8.51944	7.42527	8.23142	7.70078	8.50516	9.62821	7.76338	8.77447	7.62442	8.06198	10.2575	6.61163	6.03951	5.91751	6.02808	6.75787	6.70483	8.76111
CEBPZ	1.48323	0.00033332	0.00330298	9.50612	8.02289	10.0429	10.0841	9.60605	9.49411	9.83535	7.17639	9.8311	9.55959	9.08164	9.06211	9.77684	10.6424	9.95512	8.91205	8.99166	9.52108	9.79266	9.27468	9.50538	8.82375	10.3063	8.02939	6.22679	7.22409	7.98507	9.51432	9.15765	9.85927
CECR5	0.806025	0.0483476	0.111489	8.86956	8.06353	9.6343	9.5	9.55186	8.99005	7.8483	7.44611	8.60471	8.55768	9.2368	6.88241	8.90037	8.81955	9.50672	8.84514	8.45249	9.35113	9.14619	8.91456	7.22474	10.7273	9.95056	8.25853	7.70367	7.19418	7.26683	8.83613	9.12185	9.03929
CELF1	0.59178	0.00149561	0.00991872	9.52201	8.93023	9.50538	9.574	9.02185	9.7	9.53803	9.69871	9.6572	9.40593	9.64801	8.59412	9.87231	9.99325	9.60421	9.8547	9.3496	9.49716	9.40972	8.79779	9.6112	9.91415	9.88738	8.86745	8.67863	8.61869	8.56979	9.27003	9.57682	9.3496
CELSR1	0.763941	0.00772226	0.0316074	7.5705	6.80655	7.81826	6.74945	7.5634	7.57857	7.79432	7.24228	7.80462	7.70202	6.96535	7.0962	6.83842	6.98274	7.40771	6.84218	8.96388	8.65333	7.72958	6.85497	7.07602	8.88907	7.90873	6.68363	6.57283	7.04452	6.6841	6.81357	7.04068	8.08983
CELSR2	1.43041	1.13354e-07	7.30573e-06	8.55073	7.12032	8.39692	8.9045	8.65962	8.16248	8.66361	8.20407	9.01211	8.09384	8.62393	9.21671	8.05	8.30865	8.63388	8.07998	8.69263	9.61226	8.37555	7.78144	8.66473	9.2135	8.33066	7.31418	6.7231	6.8029	6.66132	7.37775	7.84265	8.43494
CENPA	2.92469	5.88988e-11	1.54897e-08	8.32156	5.39687	8.31503	7.51135	9.11086	9.10624	8.03689	7.50511	8.10057	8.8223	7.93102	7.82799	9.22254	8.83569	8.05806	7.94614	7.60134	8.2667	8.85803	9.4298	6.87098	8.32586	9.39026	5.83634	5.10272	5.99325	4.9977	5.46456	4.98665	8.00156
CENPE	1.41167	7.61014e-08	5.37407e-06	7.14185	5.73018	7.1977	6.18694	7.56367	7.59122	6.49631	7.0759	6.93236	7.58739	6.7331	6.75975	7.43985	7.28259	7.57727	7.31995	7.3967	7.32088	6.92087	6.98186	6.42699	7.3669	8.19544	5.95259	5.70423	5.86281	5.77132	5.79799	5.29213	6.76701
CENPF	2.52099	1.21237e-07	7.59976e-06	9.79045	7.26945	10.1408	8.84914	9.79343	10.2565	9.1708	10.2418	9.30683	10.6765	7.76846	8.73282	10.6152	9.73048	9.88665	9.50048	9.88811	9.91797	10.7427	9.93914	8.77826	10.3131	10.6981	7.90184	7.69024	8.2516	7.67612	6.45438	5.64255	10.4427
CENPK	3.20399	1.19352e-08	1.32562e-06	8.26108	5.05709	9.15388	8.5422	7.12894	8.66388	6.38604	7.11897	7.49876	8.54242	6.40497	7.6741	8.92966	9.17891	8.89022	8.71924	8.46092	7.40328	8.40665	9.4549	7.67817	9.19735	8.76943	5.48958	3.7869	5.79428	4.35058	5.71085	5.21035	9.54078
CENPL	1.5278	1.29652e-07	7.9743e-06	6.5804	5.0526	6.59686	6.44844	6.55534	7.51333	5.65332	6.14101	6.4434	6.50349	6.01122	5.7546	6.35093	6.59257	7.61107	7.18107	6.19848	6.46244	6.47088	6.92153	6.13144	6.82248	7.31625	4.97131	5.24218	4.86302	4.67432	5.32767	5.23709	7.08865
CENPM	3.01575	1.95e-08	1.9231e-06	8.09029	5.07454	8.92729	7.31851	8.74831	8.20983	7.9046	7.47559	8.22261	8.76625	6.9692	6.55812	9.10536	7.38008	8.63552	7.85391	8.485	7.64043	7.68273	9.88944	5.93369	8.98919	9.44969	5.63575	4.56445	5.37168	4.33178	5.34644	5.19717	7.84102
CENPQ	1.31985	7.52002e-06	0.000181687	7.77617	6.45632	8.94426	7.14732	7.61224	8.31466	6.71274	7.46898	7.25154	7.81891	7.00832	6.68108	8.23381	8.56087	7.66288	7.89429	7.98295	8.09774	7.92753	8.05426	7.9254	7.72911	7.99652	6.44667	6.19015	5.94223	6.26879	7.1247	6.76537	8.05035
CENPU	1.14652	0.00110733	0.0079823	8.35552	7.20899	7.80188	7.31044	8.22238	8.60865	8.06279	7.64335	8.88907	9.07909	7.62755	8.33809	8.48026	8.75673	7.85966	7.88912	8.03386	7.83967	8.29362	9.51169	8.15401	9.77732	8.75703	7.79519	7.58408	8.13066	7.8309	6.0606	5.85251	8.88505
CEP131	1.09786	0.000301009	0.00305143	7.05663	5.95877	7.55499	6.73935	7.47782	7.05943	7.16426	6.14831	7.58179	6.80162	6.9547	6.50382	7.39968	7.62442	7.36802	7.52365	6.17217	6.74046	6.61972	6.83458	5.87519	8.12283	7.59374	5.40202	5.53402	5.57678	5.53943	6.75201	6.94839	7.38537
CEP170B	0.621907	0.0264051	0.0728504	8.85489	8.23298	8.40406	8.90552	8.64327	8.30965	9.00642	8.29455	9.57542	7.87455	8.77399	9.95512	8.64074	9.68025	9.00736	8.47804	8.47406	9.87087	8.06726	8.93363	8.76346	10.0079	8.45658	7.84358	7.92096	7.99453	7.84956	8.84008	8.94917	8.68483
CEP350	0.635418	0.00195479	0.0120326	8.3339	7.69848	8.35872	8.54355	8.22238	8.08949	8.15312	7.97267	8.30733	8.26509	8.06622	8.51179	7.91936	8.39509	8.60709	8.3655	7.60316	8.75306	8.44544	7.73625	8.67764	8.83067	8.45249	7.7687	7.15961	7.18137	7.35046	8.53408	8.19666	9.0696
CEP55	3.89314	1.50336e-13	1.63795e-10	9.13286	5.23972	9.20823	8.967	9.63986	9.06308	9.1329	9.557	8.11261	8.94575	9.0696	9.28634	9.51914	9.70828	9.24557	7.96713	10.3603	8.94775	9.66618	9.41118	7.81414	9.13501	9.64876	6.58652	4.11109	5.66279	4.53845	5.67038	4.86909	8.51719
CEP68	0.59956	0.0291673	0.0782262	7.66318	7.06362	7.97483	8.10318	7.30564	7.69249	7.99373	6.84755	7.99544	7.14872	7.79054	7.22292	7.23248	8.0714	7.63018	7.85966	6.7549	7.88284	7.6314	7.42278	7.00954	7.78318	8.4238	6.1435	7.12245	6.5069	6.52442	8.02667	8.05779	8.81273
CEP70	0.73193	0.000149901	0.00180259	7.56486	6.83293	8.11294	7.30284	7.36802	7.18591	7.22213	7.48193	7.13602	7.56555	8.23381	7.71688	7.18272	8.14773	7.53086	7.16952	7.35091	8.12169	7.69055	6.72977	7.98223	7.7881	7.79567	6.80133	6.6594	6.86801	6.87749	6.94099	6.85036	7.61107
CEP76	1.37768	9.2474e-05	0.00125344	7.11128	5.73359	7.10638	6.06565	7.17081	7.39093	5.91519	5.75119	7.09943	7.45898	6.5324	5.73881	7.81734	7.59984	7.03268	7.53539	7.47252	7.67138	7.55446	8.17856	6.81753	7.42673	8.10895	5.29045	5.4936	5.27972	5.54869	6.34802	6.44108	7.003
CEP78	0.689132	0.00659455	0.0283315	7.2335	6.54437	7.33809	6.99731	6.87262	6.83554	6.70222	7.73796	7.50241	6.66936	7.20559	6.16316	8.08033	8.13091	7.33444	7.02416	7.09332	7.27418	7.07769	8.16839	6.07521	7.55175	7.55144	6.23709	6.25167	6.69426	6.63606	6.89148	6.55564	7.75092
CERS4	0.597767	0.0214139	0.0627577	6.14808	5.55031	5.99917	6.25776	6.52773	6.64133	5.22464	5.45468	6.22958	5.8223	5.71191	5.70161	7.63268	6.94758	6.31165	6.76606	6.01179	5.64083	6.11033	5.55005	5.6742	6.11459	6.59189	5.0913	5.26494	5.28026	5.35433	6.09786	6.21319	6.33543
CERS6	0.719057	0.013739	0.0467895	8.33054	7.61149	8.24256	8.11786	6.8542	8.42113	7.83798	8.89402	8.85653	7.70992	8.55509	8.27797	8.63347	7.87024	8.7475	8.30086	8.70879	7.86703	8.27099	8.47771	8.03489	8.80415	8.43846	7.20904	6.86336	6.82311	7.30659	8.88869	8.57812	9.35059
CFL1	1.54364	4.9296e-09	6.12985e-07	11.1758	9.63215	10.9532	10.9586	11.0392	11.3423	11.0001	11.4992	11.1647	11.3154	11.2816	11.18	11.5332	11.052	11.468	11.1557	10.9298	11.3873	10.3891	11.5873	10.9045	11.5993	11.0605	9.84992	9.07799	8.97887	8.95466	10.5129	10.4185	11.0663
CGREF1	0.711285	0.0327424	0.0851193	5.91232	5.20104	6.15489	7.34792	6.07001	5.86984	5.94938	5.02298	6.08122	5.20841	5.68875	4.87878	5.63589	5.70711	6.98617	7.28586	4.6512	6.70434	4.85743	6.02009	5.28799	6.31471	5.84544	4.84639	4.98585	4.76306	4.95829	5.74799	5.90466	6.50272
CHAC2	0.751014	0.00807689	0.0325935	7.13576	6.38474	7.31233	6.74973	7.28435	7.55175	6.59189	7.03515	6.56196	7.48757	7.06712	6.92549	7.61224	7.81713	7.35104	6.87359	7.24007	6.69711	7.10638	8.5094	6.74611	6.04086	7.95121	7.18393	7.16816	5.96459	6.51364	6.04999	5.42815	6.47419
CHAF1B	0.634301	0.000159293	0.00188547	6.91851	6.28421	6.98358	6.53103	6.83653	6.81944	7.29506	7.02893	6.90088	6.65464	6.47028	7.09197	6.82395	7.15001	7.08059	7.23779	6.98264	7.00549	6.26898	7.46845	6.79193	7.23769	6.95285	5.8173	5.91761	6.57129	6.17636	6.67665	6.54607	6.59456
CHCHD1	1.1078	0.000105977	0.00139113	9.91531	8.80751	10.3326	10.0312	9.6622	9.79423	9.75759	9.56857	10.6023	10.4369	9.84902	10.1943	11.3986	9.44338	9.34049	10.3693	9.59873	9.31024	9.66701	10.1707	9.31892	10.0618	10.1055	8.60865	9.09654	7.97244	8.25218	9.37447	9.54078	9.12344
CHCHD10	1.52318	0.000809252	0.00631719	8.51661	6.99343	10.2903	8.97266	8.50025	8.16144	8.11759	7.69434	8.66361	7.17902	10.9224	8.1632	7.89382	8.4641	9.0811	8.37159	8.20983	9.1454	7.16656	7.77499	7.08114	10.5094	8.65421	6.87532	6.77331	7.12091	6.6514	7.28494	7.25469	8.34841
CHCHD2	0.651791	0.000227843	0.00247298	12.1601	11.5083	12.2647	12.0775	12.1286	12.3764	11.9967	12.5035	12.0244	12.5927	12.3453	12.0637	12.8567	12.3815	11.6988	12.3127	12.3235	12.2792	11.9891	12.3266	11.6078	11.6158	12.3621	11.2688	11.5387	11.4186	11.3461	11.5853	11.8923	11.3951
CHCHD3	1.57069	3.74463e-08	3.1583e-06	10.0528	8.48208	10.1741	10.3851	9.66838	10.0928	9.97173	10.8204	9.61354	10.1884	9.68325	10.5882	10.321	10.5406	9.94908	9.65572	9.81885	9.94649	10.0223	10.1543	9.58488	10.6472	10.0063	8.61428	8.2667	7.80999	7.64884	9.20929	9.34336	9.32809
CHCHD7	1.2895	1.42476e-05	0.00029617	9.03862	7.74912	9.41231	9.44612	8.61589	9.1912	9.04291	9.03014	9.11086	8.38981	9.50328	8.90503	8.67717	9.56088	9.51169	9.84332	8.79038	9.20823	8.75933	7.76536	7.72886	9.2805	9.56791	7.60338	7.88003	7.29385	7.09244	8.17957	8.44544	9.50856
CHD2	0.657206	0.0110248	0.0404175	7.25235	6.59514	6.79371	7.2936	6.77044	6.93166	7.32819	7.36209	7.36552	6.20289	6.92174	7.16007	7.83609	7.85942	7.34582	7.38547	7.585	7.7837	6.778	6.96565	6.6583	8.25488	7.24076	6.30461	6.16101	5.90036	6.16388	7.62377	7.4172	7.7286
CHD4	0.69433	0.00102154	0.00753963	9.9752	9.28087	9.82398	9.89406	9.77732	10.2213	10.458	10.4665	9.19233	10.6424	9.98114	9.59472	10.4286	10.6348	9.49381	9.90761	9.98273	9.49102	10.4565	9.03929	9.89884	10.0125	10.1487	9.17751	9.04291	9.16317	9.14826	9.34336	9.80999	9.90819
CHD7	1.62579	2.0757e-05	0.000392029	8.08838	6.46259	8.07081	7.5426	7.24411	9.0347	7.31712	7.20663	7.75198	8.20856	8.29241	6.82395	7.60275	7.92281	7.88223	9.17242	9.0568	8.30697	9.43996	6.70098	8.37062	8.53884	8.47114	6.06565	6.04133	6.21381	6.52758	6.78186	7.14528	8.98597
CHD8	1.04153	6.16919e-05	0.000916742	8.17719	7.13566	8.15247	7.89853	7.86201	9.01211	7.89649	8.89706	7.82209	7.86598	8.4175	8.14998	8.58236	8.55037	7.46373	9.17618	8.07437	8.15247	8.01271	7.39	8.18874	8.3915	7.9924	6.59035	6.74326	6.71048	6.93387	7.85308	7.98295	7.94923
CHERP	0.62415	0.000767477	0.00606559	9.28911	8.66496	8.9332	8.85763	9.11294	9.46296	8.77717	9.64397	8.59959	9.94331	9.50718	9.02979	9.8835	10.0373	9.07614	9.02546	9.31945	9.30177	9.14237	9.01019	9.38975	9.30128	9.48368	8.51426	8.7276	9.06004	8.58633	8.37808	8.72343	9.52174
CHI3L1	1.2761	0.0142727	0.0479319	8.4604	7.18431	9.44817	7.98889	8.22565	8.19903	9.24557	9.25699	8.94426	7.98753	6.48155	6.46629	8.34434	9.47839	10.2377	9.52108	7.02052	9.30508	6.87432	7.06007	9.16258	9.80761	8.6977	6.70647	6.22342	6.73161	6.42147	9.10795	7.91492	8.37555
CHKA	0.970163	0.00262807	0.0149244	7.08105	6.11089	7.28066	7.9995	6.85235	7.43805	6.47925	6.167	6.76405	6.5854	6.8842	6.70769	8.01364	8.23381	7.45878	7.12078	5.69113	8.59959	6.68853	6.68947	6.51354	7.54594	6.82346	6.28748	6.03919	5.7477	5.48107	6.36395	6.74592	7.24625
CHML	1.62231	0.000302266	0.00306147	7.04962	5.42731	7.60891	6.34093	7.46385	6.97766	6.1002	4.6084	8.01935	6.55627	6.72721	5.44816	7.1195	6.79852	7.84739	6.81243	6.82914	7.5234	7.93555	7.26654	6.99904	8.69871	6.99383	4.93827	4.63051	5.02047	5.49153	6.56762	5.91545	8.41664
CHMP1A	0.862538	0.00423981	0.0208259	8.5437	7.68117	7.92753	8.53501	9.31378	8.82375	8.17616	8.01819	7.61224	7.60166	8.94093	7.43655	7.94446	8.57768	9.23476	9.11547	8.38317	9.12185	8.18168	9.26431	8.65882	9.66144	8.3553	7.67439	7.4857	7.08468	7.11373	8.26806	8.46045	9.07676
CHMP4B	0.833621	0.0126836	0.0444003	8.36096	7.52734	7.62722	8.80415	8.36849	8.66234	8.00488	7.33414	8.39965	7.21924	7.60798	8.3215	8.34489	8.49911	8.31637	8.43223	8.44181	9.04977	8.05995	8.76183	7.79567	8.84042	10.5118	7.19144	7.62603	6.55606	6.97439	8.14707	8.66902	8.53755
CHMP4C	1.37016	0.00153518	0.0100875	9.45597	8.08581	9.01647	9.74743	9.11505	7.91288	9.28819	8.92989	10.4472	8.84682	9.25492	9.11702	9.08853	9.49224	10.7013	10.0957	10.34	10.725	9.96836	8.76804	9.28935	7.90671	10.6253	8.43009	8.80764	9.10169	8.92766	6.40667	6.8411	9.35491
CHMP5	0.76204	0.00182126	0.0114072	11.1414	10.3794	10.944	11.2166	10.5129	11.0111	11.1911	11.1595	10.812	10.2588	11.2419	11.6045	11.1441	10.6138	10.6337	10.9371	12.0269	11.9786	11.1073	11.5027	11.3911	11.7023	11.4747	10.6435	10.3565	9.60986	9.74818	10.9898	10.9287	10.6472
CHORDC1	0.728242	0.00202493	0.0123449	8.21521	7.48697	8.54286	8.93756	7.87385	7.9329	8.32838	8.22216	7.81767	7.61989	8.56939	7.544	9.0347	8.66594	8.8742	8.18634	7.89214	7.94696	7.4806	8.60581	7.65307	7.89649	8.07437	7.63935	7.11098	7.17241	7.59824	8.03099	7.36983	9.03531
CHPF2	0.923031	0.00457348	0.0219564	7.59435	6.67132	7.09502	7.53094	7.81826	8.22906	7.04434	7.74929	8.56939	6.62785	6.41074	7.65854	8.25055	8.65502	8.31443	7.69331	6.5152	8.80339	6.80582	8.23718	7.04008	7.02107	7.41883	6.1908	6.5286	6.45698	6.36387	7.21381	7.27386	7.58739
CHPT1	1.0819	0.0169647	0.0537534	8.13725	7.05535	8.47696	10.5977	7.93757	7.97679	8.27473	9.13449	8.11726	6.29862	7.81553	7.47252	8.18493	9.63231	8.29362	7.32666	6.71498	7.99544	6.44014	8.80026	7.92096	8.03006	9.09606	6.76043	6.93619	6.38766	6.09075	7.77966	8.37744	8.48187
CHRAC1	1.96461	4.5793e-09	5.85331e-07	9.7497	7.78509	9.59168	9.25063	9.67822	9.25492	9.52108	10.1231	10.2377	9.8685	9.93202	10.6326	9.1355	9.71108	10.0079	9.71481	10.0161	9.45123	9.31088	9.90761	9.437	10.8404	9.34576	7.06995	7.66288	7.60381	6.89929	8.73169	8.74293	9.5246
CHST14	0.6915	0.0493357	0.11311	8.10538	7.41388	7.72546	8.08723	8.79038	9.05977	8.09558	7.39976	9.21041	8.15227	7.11553	7.98415	9.53192	9.31544	7.68093	7.26962	6.83607	7.7045	7.80104	7.89572	8.33341	7.42951	7.8611	6.92318	7.56249	6.80081	6.64318	7.90225	8.65141	9.03868
CHSY1	1.24047	0.000160372	0.00189433	10.2282	8.98773	10.229	9.79031	11.2249	10.7129	10.0271	9.09033	10.6164	10.7723	9.97327	10.3514	11.2036	11.0995	9.71038	8.68965	10.6009	9.04525	10.2418	10.9109	9.97173	10.0548	10.1317	9.0141	8.84062	8.57158	8.58897	9.49668	9.4144	10.5721
CHTF18	0.839631	0.00623002	0.0272444	6.04515	5.20552	7.03774	6.31491	6.13958	6.55341	5.62705	5.10071	5.84413	5.69914	5.41868	5.01335	6.35456	7.17563	5.74008	6.25448	5.1186	6.68994	5.3096	6.33081	5.12695	6.56745	6.3782	4.70291	5.05697	5.19469	5.11436	5.57767	5.5865	7.19828
CIAO1	0.965026	1.90254e-07	1.07748e-05	7.87602	6.911	7.7701	8.01557	7.92192	8.29747	8.13849	7.5042	7.93226	7.89277	7.47782	7.34701	7.8804	8.16973	8.09937	7.99425	7.42951	8.11319	7.90873	7.89318	7.54764	8.01587	8.03072	6.69156	6.85096	6.63209	6.4506	7.36924	7.47153	7.89227
CIAPIN1	0.87263	0.00400074	0.0199788	8.42818	7.55555	7.34722	9.30245	8.68295	8.86968	8.16873	7.35068	7.62546	7.52156	8.56278	7.77444	9.76244	8.50642	9.19518	8.49362	8.73137	8.60232	8.17507	8.98212	8.132	9.14237	8.01309	7.12197	7.51754	7.10073	7.31625	8.08639	8.19043	8.47804
CIB1	1.00496	0.00280824	0.015637	8.59551	7.59055	7.76616	8.57421	9.25372	8.68965	9.3081	9.05356	8.91519	7.29469	8.81584	7.994	8.77115	9.41711	9.58562	8.39121	9.56453	8.95369	7.21799	9.16787	8.22499	7.53342	9.08489	7.80926	7.57422	7.12658	7.17228	7.89382	7.96713	7.52365
CIPC	0.969961	0.00973238	0.037008	9.11583	8.14586	9.3496	9.902	8.60942	8.8104	9.59743	7.96742	9.95332	8.00499	8.70297	9.32138	10.0559	10.0769	8.21993	8.6495	9.36154	8.83017	9.19376	7.24924	9.5815	9.86541	9.26431	8.07537	7.9755	7.05136	7.55639	8.9451	9.27147	9.98114
CIR1	0.661929	0.00303655	0.0165066	6.76862	6.10669	6.61718	6.83915	6.51836	6.4773	7.12718	6.2238	7.25054	5.74411	7.15001	6.52442	6.7848	7.53128	7.24311	6.71167	6.58803	6.90982	6.21011	6.797	7.01799	6.79591	6.82443	6.05057	5.645	5.59523	5.73616	7.15127	6.46193	7.02353
CISD1	0.956206	0.0180899	0.0560076	7.67167	6.71547	8.04308	8.80803	7.92973	7.57715	6.91733	7.08794	9.03742	6.61595	7.12546	6.33401	7.77813	7.89883	8.62609	8.25821	6.92344	7.85503	6.91733	7.5932	5.93981	8.54307	8.70325	5.82132	6.68432	5.99576	6.12422	7.79264	7.87455	8.26437
CISD2	0.650146	0.00726394	0.0302896	7.75844	7.10829	6.83567	8.03289	7.74723	7.66609	7.93906	7.25262	7.29408	8.04454	7.25902	7.77752	7.75564	8.7453	7.50269	7.95622	8.52991	7.63466	7.49432	7.38255	8.00589	8.21386	8.29202	7.96067	6.97512	6.32339	6.50341	7.61679	7.27038	7.32383
CKAP4	0.730469	0.0132402	0.0457194	10.8307	10.1003	11.1441	10.314	10.6609	11.4272	10.5313	11.0082	10.8174	11.0467	10.4197	10.4011	11.0787	11.6747	10.7819	10.0412	10.0893	10.1864	11.432	10.5214	12.1176	10.6536	10.683	9.54132	9.93045	9.14716	9.57469	11.2688	11.1391	11.2455
CKAP5	1.36708	2.23415e-05	0.000415525	8.67014	7.30306	8.6419	8.55662	8.61154	9.28997	8.20468	8.38631	8.90413	8.44667	7.98529	7.12953	9.6445	9.2151	9.2252	9.09149	8.61154	8.69513	8.36645	8.78888	8.22833	8.99811	10.0116	6.91519	7.23112	7.31599	6.76537	7.63413	7.95657	7.71008
CKB	1.08027	0.0102785	0.0383454	8.22974	7.14947	8.81855	8.98871	8.46691	8.60552	7.99503	7.69275	6.39563	9.49039	7.98028	6.53258	7.93757	8.39825	8.57237	8.6973	8.55551	9.23266	8.13556	7.31943	8.14707	8.68632	8.73842	7.2586	7.78556	8.61589	7.89944	5.16773	6.16959	7.66748
CKLF	1.24483	0.000862953	0.00663792	9.27152	8.02669	8.24738	8.88592	9.54942	10.046	8.60232	9.04938	9.21435	8.40117	8.2712	8.88505	9.4191	8.36849	10.7052	9.71869	9.14088	9.41592	7.97419	10.5477	9.43335	10.8968	9.66408	8.04454	7.56186	8.02262	7.41401	8.60117	8.51595	9.53693
CKS1B	2.47823	3.14779e-12	1.41219e-09	10.7185	8.24028	10.8028	10.5963	10.5189	11.3461	10.1842	9.84828	10.5203	11.2073	10.3828	9.82462	11.1998	11.0167	11.1865	10.469	10.7224	10.8968	11.3487	11.1686	10.2954	10.7682	11.1322	8.43926	8.16941	8.12383	7.24967	8.6557	8.80381	10.3712
CKS2	3.34779	3.06581e-11	9.20885e-09	11.026	7.6782	11.6587	10.9695	11.1686	11.157	10.7416	10.9323	11.2646	11.2455	10.2749	10.1224	12.435	11.4573	11.9258	10.8555	10.4299	11.1911	10.4162	11.3009	8.67362	11.3137	11.778	7.90512	7.20451	8.5672	7.21179	7.97751	7.20309	11.2595
CLDN10	1.98061	0.00185167	0.011544	7.20234	5.22173	7.21504	5.72664	7.81568	6.74453	7.60058	8.60552	6.39029	5.4322	9.56968	6.56999	7.21993	5.03159	7.57535	7.8483	6.2399	11.0407	7.06823	4.88067	7.28007	7.24755	8.94139	5.34047	5.26523	5.54869	5.07625	5.01014	5.08961	6.40767
CLDN12	1.12995	0.000218057	0.00238742	9.54062	8.41066	8.99357	9.47093	9.60039	9.6343	8.64992	11.0535	9.21757	9.5395	9.51036	9.08805	9.84992	9.93914	8.72908	9.53342	9.33006	10.1893	10.1928	9.61226	9.49547	9.34774	9.6712	7.67941	8.29362	7.6853	7.87909	9.56791	9.35866	9.24503
CLDN16	0.683449	0.0452562	0.106552	7.4591	6.77565	7.74919	6.73257	6.69594	7.51203	8.82776	6.73996	7.1369	6.83554	7.43641	7.58464	7.45243	6.99752	8.02003	6.50375	9.54797	7.29087	7.37787	6.2766	7.74829	8.85301	7.47098	7.39379	7.01544	6.63303	6.63788	6.4983	6.47546	7.30993
CLDN3	3.47378	6.18592e-09	7.48856e-07	9.99291	6.51913	9.69836	9.26106	10.6402	10.9237	9.67915	11.276	11.065	9.20767	9.52553	8.89089	9.78294	10.8378	9.71734	11.1507	10.183	11.4371	9.48828	6.63532	10.1387	10.5882	9.763	6.89939	6.41342	7.00876	6.93766	5.82092	6.03464	9.95406
CLDN4	0.672469	0.00796499	0.0322947	8.16267	7.4902	7.68503	8.28469	7.92794	8.3655	8.69977	9.30245	8.32368	8.43122	8.0056	8.41711	7.54299	8.21266	7.24625	8.30733	8.72259	8.97093	8.49977	7.71479	8.15435	7.58918	7.91188	7.9592	7.82516	7.86889	7.54148	6.78031	6.96617	7.26299
CLDN6	0.914041	0.0150154	0.0496225	6.41128	5.49724	6.81494	6.4317	6.31867	8.05238	5.55099	5.351	5.97515	6.77264	5.66752	5.3122	8.65502	6.6146	5.8869	6.3896	6.36566	5.95571	7.49864	5.40424	5.8269	7.22707	5.9587	5.10875	5.52695	5.44393	5.33313	5.70639	5.8643	7.01799
CLDN7	1.27445	5.54123e-07	2.45177e-05	8.58139	7.30694	8.57932	9.03694	8.69848	8.24449	8.2326	8.37062	9.08489	8.47984	8.42266	9.1067	8.45763	8.31407	7.59628	8.98262	9.07954	8.63985	9.0811	8.59959	8.83483	8.60972	8.88869	6.90305	7.2148	7.9195	7.53979	6.97657	7.28792	7.45004
CLDN8	0.645876	0.0401278	0.0980693	5.32742	4.68154	5.53267	5.75162	4.7406	5.10384	4.56542	4.81182	5.64794	5.11987	5.08656	5.78895	5.31764	4.85438	5.33069	5.12879	5.24419	5.18709	4.67215	5.24491	4.67972	8.03952	5.11547	4.2589	4.55026	4.50173	4.61543	5.09266	5.07027	6.23937
CLDN9	0.686632	0.0122861	0.0433938	6.53082	5.84419	5.99962	7.05178	6.91408	6.41886	6.34762	7.04762	6.59267	6.33732	5.38551	5.71159	7.67042	7.50366	6.39641	6.75906	5.65246	6.2142	5.85324	6.71755	6.34811	6.85497	6.39792	6.03856	5.47156	5.50948	5.5525	6.24603	6.24701	7.5034
CLEC18A	1.18287	0.0495259	0.113395	6.22808	5.04522	5.20336	5.04645	9.00555	9.4144	5.25473	5.72353	4.9951	6.51174	6.07584	5.28917	7.66708	5.29289	6.70154	9.66701	5.37635	5.06405	6.49125	4.96815	5.57238	6.16379	5.2179	5.61529	4.90961	4.78644	4.7024	5.10954	5.14802	6.31556
CLEC5A	0.757419	0.00483448	0.0228783	5.27923	4.52181	5.13327	5.94993	5.55147	6.39068	4.76569	5.39452	5.59653	4.56425	5.53721	5.126	4.5782	4.7381	5.56802	5.12936	5.09959	5.50315	3.99499	5.5859	4.60089	6.05057	5.79982	4.05634	4.0049	5.05509	4.32922	4.68352	5.00181	5.48495
CLGN	1.74389	0.0161366	0.0520887	8.63232	6.88843	9.53749	7.34943	7.63719	6.78871	7.98717	7.44213	10.6062	6.20963	10.4757	5.21589	8.56313	6.99462	9.13029	10.7712	10.0567	10.4045	6.92215	10.7195	7.31085	10.2639	10.5583	6.88593	6.05848	6.7501	7.40068	7.16496	7.07042	8.9665
CLIC1	0.942166	0.000689429	0.00562646	11.9406	10.9985	12.2332	11.2836	12.101	12.6855	12.2875	11.935	11.948	11.0111	11.8452	12.4171	11.948	11.1156	12.5127	12.0667	11.8399	13.1554	11.5936	12.903	11.3873	11.5853	11.5332	11.0714	11.1425	10.5455	10.3638	11.449	11.4186	11.3056
CLIP2	1.19803	7.1989e-08	5.20909e-06	7.655	6.45697	7.68003	7.45779	7.91136	7.64234	7.32954	7.96849	7.50366	7.96884	7.90015	7.33029	7.77284	8.27281	7.51914	7.77966	7.88398	7.71934	7.27249	7.73883	6.80393	7.63768	7.87675	6.12605	6.58218	5.95215	5.99641	6.97178	7.11325	7.44014
CLNS1A	0.803456	0.00185563	0.0115623	9.94521	9.14175	9.66977	10.5773	9.40783	10.4967	10.0298	10.1707	9.5395	10.0483	10.2377	9.28578	9.98114	10.1436	10.791	10.3828	9.52717	9.68096	9.28691	9.28219	9.32476	10.3969	10.3841	8.73505	9.33094	8.58897	8.40367	9.65945	10.1324	10.1497
CLPP	0.823593	0.00890845	0.0347864	7.46898	6.64539	7.89853	8.44116	7.5888	8.05072	6.72821	6.60453	7.74966	6.32038	6.73744	6.89324	7.75263	7.26393	8.75088	7.4641	6.77785	7.0362	7.29873	8.37623	6.88478	7.76142	8.25779	6.2686	6.66216	5.87361	6.35939	7.28961	7.41894	7.68034
CLPTM1L	1.58845	2.97884e-08	2.66234e-06	10.3237	8.73528	9.72069	10.0874	10.567	10.6391	10.112	10.5345	10.4139	10.2394	10.3467	9.55186	10.5547	10.8064	10.4546	10.6032	10.8795	10.1961	9.52553	10.3881	10.2836	10.843	10.4377	8.41834	8.7036	8.06377	8.02597	9.49607	9.70395	9.93717
CLPX	0.722236	0.00519215	0.0240306	8.55773	7.83549	8.24062	9.27265	8.30965	8.50973	9.31435	7.75965	9.45415	7.69024	8.23718	8.59042	8.43095	9.61178	7.93198	8.03035	9.11815	8.77985	8.26116	7.86168	9.01313	8.70538	8.80207	7.95289	7.67585	7.36024	7.58739	8.39085	8.04574	8.34489
CLSTN1	0.731143	0.0108527	0.0398893	10.9962	10.2651	10.7336	11.0218	10.7348	10.9707	10.9954	11.2866	11.7111	10.2922	10.1387	11.9666	11.4783	11.2614	10.9045	10.6742	10.3053	11.5052	10.5367	10.2257	11.1487	11.3257	10.9487	9.62996	10.2231	9.20534	9.98	11.0356	11.5163	11.7505
CLTC	1.06271	0.000197494	0.00222047	10.875	9.81226	10.7259	10.0618	10.5477	11.1243	10.7946	11.7876	11.4704	10.8323	11.1124	10.2611	11.2432	10.478	11.1699	11.03	11.6419	10.7946	10.5386	10.7893	10.8104	10.4045	11.2972	9.64659	9.56155	8.85394	9.10424	10.9337	10.7736	10.3335
CLU	1.87187	0.0121818	0.043159	11.2501	9.37822	10.4624	12.8321	10.1026	12.2225	11.8997	11.8767	12.2999	7.39741	11.1756	12.2792	11.0467	10.4103	12.9339	13.0813	11.9703	12.1757	9.84401	7.58995	12.7552	12.3549	9.10889	7.65179	9.43934	9.20309	7.87353	10.9274	11.1742	11.6826
CMC1	0.977279	0.00147403	0.00982976	8.47812	7.50084	9.03066	8.83862	8.25488	8.47629	8.06078	9.16641	8.4353	8.63737	8.41027	7.89078	8.19983	8.29631	10.0204	9.42103	7.72414	7.76383	8.0911	8.74031	7.23408	8.81736	9.18704	7.12166	7.73346	6.94606	7.10811	8.1015	7.99425	7.82182
CMPK1	0.903342	0.00490817	0.0231068	9.8794	8.97606	9.06779	10.4472	9.20138	9.55959	10.2628	9.89123	9.87765	8.52845	10.4	10.1953	9.58904	9.46132	10.2522	9.52768	10.3003	10.7792	8.69469	10.1509	11.1027	10.099	9.84177	9.0228	8.89402	8.4021	7.87579	9.8212	9.84045	10.1168
CMPK2	1.40908	0.0165223	0.0528364	9.40706	7.99798	9.57321	9.67431	11.1012	10.7691	10.7819	8.40992	10.7481	6.99609	9.06779	10.1072	7.85573	10.0047	8.03178	8.86642	7.50269	9.83027	7.33139	11.3849	8.84042	11.2016	10.2325	8.69001	8.30052	6.91225	6.96506	8.65178	8.46824	8.64434
CMSS1	1.58087	1.85271e-05	0.000360152	9.36375	7.78288	10.083	9.62648	9.58783	9.26153	9.20876	7.88994	8.27834	10.1261	10.2797	8.49868	9.724	10.2306	10.1707	9.20575	8.12421	9.06717	9.895	9.9473	8.83246	8.99504	9.03637	7.02184	8.04199	7.36307	7.48614	8.35565	8.4286	9.9335
CMTM6	2.0877	4.76571e-07	2.18955e-05	10.6065	8.51882	10.5085	9.54018	10.0928	11.3295	11.6914	12.0484	11.3137	9.43175	10.9156	11.0702	10.6391	9.90055	10.6814	11.401	10.8994	10.9759	10.5999	9.26899	9.59921	10.3724	10.8612	8.81604	8.06554	8.01029	7.84762	9.04339	9.33006	10.2025
CMTM7	2.3557	3.58753e-07	1.74273e-05	9.73447	7.37877	9.72974	7.23141	9.70085	10.0071	10.1399	11.2057	10.5455	10.5796	10.0306	9.54346	9.27819	8.7488	10.1113	10.2979	9.99045	10.3662	9.8547	8.66168	8.55698	8.99357	10.6564	8.1048	6.95935	7.45878	7.06766	7.31995	7.36209	9.9285
CMTM8	1.81939	4.86315e-06	0.000128919	8.03271	6.21332	8.20148	8.21585	7.58756	7.94303	6.83744	9.22466	8.86968	7.18306	6.99263	8.57275	8.74327	8.65744	8.88973	8.47629	7.65004	8.80444	7.76536	6.82882	6.59236	7.54574	9.08001	5.85324	5.98878	6.24868	6.12497	6.71334	6.35093	8.05806
CNBP	0.655495	0.00276597	0.0155111	11.1483	10.4928	11.0319	11.5163	10.9839	10.9986	11.5027	10.6524	11.5569	10.515	11.3009	11.355	11.4621	11.6122	11.3931	10.843	10.7029	11.052	11.3911	10.5076	11.4044	11.0857	10.8952	10.3162	10.7805	9.71481	9.73048	11.0236	11.3911	11.4992
CNDP2	0.890844	0.0044398	0.0214808	9.30698	8.41613	9.19853	9.06779	9.24792	9.57264	10.8489	8.74934	10.9954	8.62223	8.42031	9.37043	8.59764	8.98952	8.66512	9.13784	8.9986	9.38346	9.06834	9.2151	9.78621	9.65662	10.4369	8.97183	8.08138	8.70675	7.97267	8.25191	8.51225	8.72462
CNIH4	0.693729	0.000484244	0.00432624	9.13585	8.44212	9.2927	8.91826	9.21805	9.26266	8.77069	9.60338	8.89175	8.91826	8.77252	8.53321	9.72218	8.58999	9.74133	9.80021	9.07614	9.26266	8.71924	9.22886	8.85009	9.48368	9.63304	8.19201	8.36807	8.30796	8.16839	8.84514	8.77115	8.69977
CNNM4	1.23089	3.03931e-05	0.000528817	6.9331	5.70221	6.47768	7.83891	6.7549	7.23112	6.31242	6.9047	7.66431	5.99899	6.67883	7.3583	6.9481	6.97428	7.01072	7.28345	5.83914	7.83571	6.11548	6.89324	6.40999	7.21583	7.08988	5.38312	5.17401	5.6659	5.51393	6.11382	6.36248	7.69231
CNOT6	0.716199	0.0194143	0.0587177	8.82654	8.11034	9.18323	9.40251	7.90906	8.25019	8.26825	9.0736	9.63474	8.61869	9.0424	8.79387	8.52845	8.67519	8.74478	9.26197	8.16813	7.93727	8.4357	7.8402	9.10076	10.7154	9.10272	8.11038	8.00887	7.50987	7.61405	8.68749	8.73137	9.49668
CNOT8	0.716536	0.00118308	0.00833917	8.63614	7.91961	8.16168	9.08559	8.42816	8.46582	8.75784	8.23104	8.62393	8.58091	8.74327	9.04474	8.05552	8.37124	8.88458	8.80207	8.67271	7.77785	8.7437	7.92822	8.59083	9.62033	9.35411	8.19544	7.93274	7.57446	7.39769	8.12652	8.29081	9.07105
CNPPD1	1.00693	3.18887e-05	0.000548169	8.28802	7.2811	7.78836	8.69937	8.27045	8.07405	8.18368	8.00658	8.28908	7.69792	8.10895	8.44292	7.99725	8.19404	8.84287	8.85763	8.19245	9.15446	7.96067	8.15103	8.10025	9.0424	8.40806	7.08865	7.31501	6.77764	6.59059	7.65448	8.2602	7.87407
CNPY2	1.12613	0.000538196	0.00466967	9.89499	8.76885	9.59546	10.0978	10.8311	10.5302	9.99924	9.5722	10.3724	10.1995	8.9422	8.29167	11.096	10.1524	9.30972	10.3182	9.56968	9.75759	10.234	9.73104	10.0309	9.26899	10.0634	8.20185	8.74132	8.24449	8.05099	9.58416	9.79031	9.72616
COA3	0.704506	0.0263586	0.072766	9.05913	8.35463	9.74743	8.06104	9.63774	9.64659	8.25089	8.00323	8.70585	9.29165	9.4856	7.88884	9.86463	8.13454	9.07909	9.7835	9.44338	8.56548	9.11638	9.80249	9.07461	9.51376	9.75402	7.5932	8.63552	7.95539	7.85475	8.77756	9.31136	8.4502
COA4	1.61599	0.000209991	0.00232555	10.3426	8.72659	10.8147	10.0228	9.92152	10.5447	10.1592	10.1631	11.1816	10.3244	10.9109	9.23628	9.03988	10.694	11.9786	10.8295	10.2588	10.8795	8.73549	10.5873	8.75703	10.8458	11.1441	7.30484	8.90413	8.38631	8.01739	9.81251	9.93433	10.5076
COA5	0.916236	1.96173e-05	0.000373413	9.49671	8.58047	9.56656	9.2368	9.33006	9.82312	9.53421	9.57682	9.40593	9.49295	9.61082	9.26153	9.51432	9.64599	9.59168	9.85345	8.83017	9.24322	9.68389	8.75614	9.59168	9.902	9.53554	8.5035	8.71888	7.95811	7.76762	9.24359	9.29114	9.94075
COA6	1.77682	3.23203e-07	1.62883e-05	9.21042	7.4336	10.4678	8.99698	9.22308	9.19999	9.26952	9.17811	9.20575	8.46465	8.2066	8.38143	9.27945	10.6671	9.41387	9.02239	8.90681	9.06308	8.75088	9.59972	9.20767	9.5837	9.81672	7.50618	7.35555	6.68634	6.78668	8.38143	7.88541	8.72395
COASY	0.703853	0.00892581	0.034836	8.44671	7.74286	9.40924	8.00358	9.2368	8.69937	8.71004	8.02755	7.83967	7.14851	9.06896	7.95785	8.57237	7.80165	8.21333	8.84399	9.18048	7.79226	8.50415	8.95466	7.74723	8.77252	9.20445	7.87092	7.46747	7.87299	7.57764	7.64009	8.02804	8.13903
COG5	0.810124	0.00214321	0.0128951	7.47126	6.66113	7.34161	7.23667	7.20937	7.98907	6.49969	7.75934	7.30462	6.90187	6.56042	7.51108	7.30722	8.31972	7.50218	7.76678	7.57009	8.53114	7.23769	8.29563	7.25809	6.98143	7.60758	6.20172	6.52815	6.29976	6.14798	7.49824	7.29096	7.67641
COG7	0.770989	0.0102468	0.0382663	6.73894	5.96795	6.79752	6.84018	6.84846	6.86198	6.0959	6.07403	6.6388	5.86297	5.8652	5.74198	7.76935	6.72721	7.30982	7.59122	6.54506	7.66561	6.06487	6.51487	7.02948	7.11036	7.10539	5.28757	5.71645	5.51017	5.50266	6.72612	7.06476	7.19647
COL18A1	0.793255	0.0143394	0.0480993	8.32196	7.5287	8.93908	8.97142	7.91431	9.11294	7.82477	7.98685	9.31812	7.24811	7.85015	7.51887	8.01704	8.30937	7.88738	8.7036	7.7213	9.19233	8.11277	8.4422	7.33336	9.0568	8.25416	6.32287	7.41894	7.40771	7.3528	8.59042	8.07948	9.36813
COL23A1	0.983425	0.0175766	0.0549991	6.63544	5.65201	7.48252	6.19375	5.7096	5.91169	5.59274	5.77013	7.64473	5.7788	5.91001	7.2445	6.53567	7.5468	5.90992	6.14515	5.94938	8.36018	5.88254	5.6706	7.06476	8.20484	6.79331	5.76758	5.50126	5.77619	5.73706	5.59507	5.53493	8.67804
COL4A1	1.76453	0.000113534	0.00145853	9.15626	7.39173	9.77488	8.17941	8.74478	10.694	8.50841	7.78703	9.64267	9.72974	8.36616	10.0183	11.5482	9.0811	9.02239	8.21266	9.48368	8.20954	9.32476	10.2473	8.1204	8.15282	9.43865	6.91281	7.17294	7.02831	7.44411	8.50233	7.28988	9.15079
COL7A1	0.646781	0.0101667	0.0380338	6.33619	5.68941	6.29964	6.00506	7.30262	7.09715	6.0473	5.95396	6.83632	5.6262	6.25003	6.20815	6.59488	6.51579	6.49085	5.90268	5.65365	5.90591	5.94645	7.81297	5.63433	6.81393	6.11435	5.43991	5.52413	5.73716	5.43031	6.02978	5.97515	6.38386
COL9A1	0.982552	0.0165437	0.0528511	5.50837	4.52582	5.07045	4.89992	5.41389	6.92869	4.07941	4.5692	4.48217	6.05437	4.85467	4.42767	6.76763	7.70117	4.80064	5.34117	6.17175	5.61292	6.20381	4.5728	4.72302	5.78199	5.94662	4.24746	4.53815	4.63091	4.58996	4.54552	4.60288	6.7801
COMMD2	1.02891	0.000303819	0.0030749	9.24803	8.21911	9.27819	9.0085	9.38284	9.86768	8.10701	8.4186	9.0668	9.60915	10.1452	9.36077	10.1543	10.0312	8.81273	8.83395	9.11754	9.11294	9.62164	8.91113	8.71842	9.6112	8.58349	7.98443	8.25779	7.67191	7.73036	9.10984	8.56035	9.70323
COMMD5	1.07817	2.08417e-05	0.0003928	8.19095	7.11278	8.15103	7.9924	7.45113	7.99316	7.98485	7.75185	8.85009	7.95049	8.47078	8.12852	8.2345	8.21496	9.12344	8.71842	8.54151	7.90324	7.49188	8.08351	7.83045	8.4881	9.114	7.01676	7.1674	6.60845	6.61595	7.49027	7.77785	7.73252
COMMD7	1.5493	1.33521e-08	1.44102e-06	9.94509	8.39579	10.6752	9.49224	10.3289	10.1842	9.57877	9.47093	10.3793	10.0215	10.0948	9.72307	10.2513	9.66701	10.014	10.2639	9.02491	10.1168	9.40783	10.3585	9.62092	10.4738	9.93433	8.19772	8.34318	7.97008	7.86185	8.90116	9.10076	9.70965
COMP	1.91477	0.0188988	0.0576386	6.39066	4.47588	6.34431	5.39525	7.48193	9.59669	4.6177	4.73753	8.47771	4.6075	5.61347	6.0681	5.72566	10.0696	7.31044	5.17132	4.49376	11.1614	5.05286	4.71693	4.60176	5.19934	7.53655	4.32354	4.34408	4.33677	4.43335	4.84605	4.57151	6.6146
COPA	0.978056	0.00178901	0.0112676	7.68167	6.70362	7.29159	7.98833	7.60338	8.24965	7.78144	6.88801	7.75564	6.36529	7.47252	7.09502	7.95156	7.70795	8.53755	8.32297	7.10246	8.62266	7.66216	7.00519	8.22499	7.79804	7.70814	6.3968	6.41739	5.82376	5.98406	7.61527	7.98443	7.86226
COPB2	1.49452	5.86166e-06	0.000149017	9.38589	7.89136	8.93363	8.87744	9.6112	9.37572	9.06126	9.31378	9.58273	7.8215	9.8311	9.06255	9.47716	10.029	10.2853	9.97864	8.97887	10.2628	9.04938	8.89706	10.0814	9.0347	9.58562	7.47075	7.78732	7.24336	7.31162	8.9083	8.62683	9.35866
COPE	0.658164	0.0142068	0.0477664	7.81148	7.15331	7.10685	7.7475	8.84042	7.76128	6.82882	7.63924	8.16377	7.34472	7.41046	7.15075	7.73336	8.19694	8.27952	8.26806	7.82643	9.20706	6.84796	8.26327	7.62837	7.49387	8.527	7.04141	7.23248	7.42163	7.42796	6.77587	7.02052	7.58681
COPG1	0.905147	0.000114152	0.00146482	6.96475	6.0596	6.50864	7.21017	7.67395	6.99798	7.01575	6.36346	6.6111	6.42818	6.71578	6.60909	7.22268	7.60036	7.64105	7.12454	6.20422	7.48828	7.08898	6.62372	7.17253	7.05369	7.06102	5.69659	5.9038	5.51649	5.81052	6.7518	6.6784	6.80923
COPS3	0.828273	0.00627401	0.0273688	7.99703	7.16876	8.4815	7.96554	8.24449	8.66633	7.26168	6.89148	8.04696	8.21523	7.22067	6.79455	8.69642	8.4807	8.37159	8.93994	7.7734	8.0322	8.25558	7.91044	7.7876	8.17579	7.89143	7.10638	7.29108	6.03542	6.38856	8.22973	7.96138	7.83122
COPS5	1.33175	7.31986e-05	0.00104088	11.3557	10.024	11.1897	11.4249	10.9371	11.8117	10.6776	10.1741	12.0269	11.0407	11.8961	10.5943	11.745	11.8354	11.7811	11.8888	11.3626	11.745	11.1865	10.3022	10.9191	11.3873	11.948	9.90565	9.97529	8.8751	9.27986	11.2524	10.8555	11.9518
COPS7A	1.00856	0.000304338	0.003077	8.62552	7.61696	8.30222	9.12883	9.04168	9.17357	8.33341	8.15696	8.35098	7.54706	8.03774	7.99905	9.20987	8.87958	8.53456	9.21246	9.16884	8.56468	8.48187	8.92729	8.79967	9.53421	8.45932	7.32666	7.52937	6.89067	7.17539	8.1983	8.58139	7.91769
COQ10B	0.825213	0.000246055	0.00262092	7.90776	7.08254	7.67343	7.63328	7.93994	7.85015	7.63571	8.19086	7.73095	7.33761	8.5422	8.22382	7.94021	8.74717	8.1806	7.95578	8.44076	8.44618	6.71258	7.99286	7.54933	7.63924	8.09196	6.49207	6.95909	7.2791	7.16626	7.34045	7.2583	7.51605
CORO1B	0.74325	0.000179569	0.00206045	8.13558	7.39233	8.54001	8.22565	8.09092	8.46513	7.7356	8.20983	8.2701	7.92475	7.99725	7.6605	8.3355	8.23076	9.0027	8.4815	7.92613	8.87744	7.5628	7.80586	7.35747	8.09262	8.39478	7.39255	7.56922	7.57727	7.25633	7.24357	7.31501	7.79536
CORO1C	1.18689	0.00143853	0.00965775	9.06391	7.87702	9.51096	7.90591	8.59615	10.5276	9.14005	10.1207	8.33773	9.15107	9.79343	7.67598	9.94075	9.86463	9.08441	9.26646	8.57461	9.50538	8.004	10.001	8.69214	8.18426	8.91979	8.52511	7.44125	7.89572	7.03744	8.63167	7.73095	8.60893
CORO2A	1.22233	0.000905433	0.00687792	6.90134	5.67901	6.36366	4.96259	7.37229	7.59097	6.58891	7.33277	7.42388	5.64943	6.83535	7.00225	8.08472	7.77675	7.04975	7.83873	7.00649	7.71517	6.18868	5.64661	6.2626	7.50392	7.10841	5.65011	5.87303	6.20834	5.60412	5.68367	5.05482	6.52556
COX14	0.798305	0.00241119	0.0140591	9.99309	9.19479	11.1332	10.2721	10.3921	10.5386	10.3638	10.1136	9.74133	9.94649	9.61178	8.98298	10.6274	9.80835	10.3851	10.2349	9.48091	9.79797	9.92104	9.42929	9.68157	9.79103	10.3575	8.96119	9.30449	8.61074	8.46712	9.72616	10.099	9.2368
COX17	0.736378	0.00120288	0.00843453	7.63839	6.90201	7.82221	7.53368	8.08905	7.68957	6.97806	7.68652	7.95578	7.29121	7.92374	7.53128	7.90534	7.86089	8.60627	8.38431	6.50366	7.59262	7.20524	7.8309	6.77391	7.68704	7.7003	6.66004	6.74371	6.79942	6.85915	6.9486	7.40116	7.49304
COX2	0.585242	0.0020915	0.0126563	13.8088	13.2235	13.9305	13.8045	13.9154	14.0714	13.9154	14.0463	13.7224	13.3045	13.4153	14.0463	14.0714	13.6351	13.2446	13.7725	14.4021	13.442	13.8793	14.03	14.0463	13.8793	13.8631	12.9417	12.8869	12.7789	12.7721	14.0463	13.9154	13.3556
COX5A	1.29855	1.05272e-08	1.21037e-06	11.3312	10.0327	11.1686	11.6331	11.5681	10.9727	11.5759	11.4371	12.1593	11.109	11.6476	11.5482	11.1391	11.628	11.3788	10.8347	11.0033	11.1258	10.8189	11.6419	11.2036	11.5052	11.7111	10.2488	9.97173	10.0579	9.74658	10.1516	10.0194	10.477
COX5B	1.33261	1.85532e-09	2.84897e-07	12.2398	10.9072	12.3764	12.1443	12.1244	12.3351	12.0809	12.5366	12.2906	12.23	12.4996	12.3087	12.1286	12.2678	12.6624	12.2087	11.5554	12.5127	12.2647	11.432	11.9818	12.5266	12.554	10.6609	10.9898	10.5286	10.4553	11.3154	11.4933	12.2549
COX6B1	1.23177	0.000103132	0.00136082	12.0397	10.8079	12.3732	12.34	12.8726	12.9115	10.738	10.9707	11.8577	11.5497	12.0135	11.8481	11.5936	11.3951	12.4554	12.5266	11.766	12.4505	11.7738	11.8481	11.4783	12.3266	13.5516	10.5849	10.8732	10.3828	10.4495	11.1699	11.3873	12.2332
COX6C	0.951421	9.28928e-06	0.000213822	12.8481	11.8967	12.7045	12.6411	12.5083	12.4402	12.675	12.9791	12.9115	12.712	13.0898	13.3045	12.675	12.559	13.0402	12.9339	13.3183	12.9977	12.97	12.1176	13.0055	13.0477	13.1331	12.2361	11.8628	11.065	11.2036	12.517	12.4957	12.8948
COX6CP1	0.761922	0.00081543	0.00635164	6.96875	6.20683	6.81615	7.18955	6.58793	6.71274	6.63543	6.89341	7.14378	6.36004	7.49636	6.90292	6.69552	6.5952	8.025	7.36677	7.26771	7.18033	7.01432	5.98218	6.60366	7.26082	7.75452	6.13222	6.25313	5.78239	5.84796	6.56683	6.65847	6.82825
COX7A2	0.918316	0.000690943	0.00563392	12.5468	11.6285	12.92	11.0467	11.9703	12.4673	12.3978	13.2299	12.6538	12.6349	13.1235	11.8997	12.8726	12.3764	12.2051	12.4869	13.2205	12.712	12.799	12.0009	12.4171	12.9623	13.2299	11.3365	11.748	11.1298	10.9576	12.2131	12.3859	12.4033
COX7A2P2	0.976631	0.000264301	0.00276129	11.5273	10.5506	11.9137	10.9759	10.9403	11.3056	11.6562	12.3266	11.6172	11.5415	12.2498	10.4953	11.9518	10.9745	11.1012	11.2576	12.304	11.7714	11.8354	10.8218	11.1441	11.9327	12.4461	10.3594	10.7618	10.1532	10.2749	10.7545	11.0001	11.0372
COX7B	1.40497	1.46143e-07	8.72435e-06	11.5251	10.1201	11.8696	11.6187	11.583	11.1073	11.4293	11.6884	11.5781	11.8225	12.1863	12.3351	11.5554	10.5999	11.6587	11.468	11.4371	11.2614	11.3087	10.9061	11.157	11.8923	11.6476	9.86089	10.1697	9.54195	9.4298	10.9237	10.7946	11.4412
COX8A	0.613601	0.00936984	0.0359581	11.9562	11.3426	12.152	12.3453	11.6313	11.6941	11.7839	11.9292	12.23	11.5096	11.7213	12.0809	13.4153	11.745	12.6301	12.0009	11.8659	11.3524	11.8399	11.9703	11.2016	12.731	12.1863	11.6587	11.5144	11.2298	11.2776	10.9727	11.4025	11.0203
CP	3.61521	7.62043e-06	0.000182954	9.98955	6.37434	10.6472	6.79724	10.6023	10.5583	11.5612	10.1509	8.79967	6.24174	11.6187	9.11596	8.66858	10.2139	10.8378	11.3704	11.8066	12.1888	10.4348	7.56745	11.0167	10.2249	8.76452	6.4959	6.18037	8.02691	6.85966	5.11596	5.56726	10.5826
CPNE1	0.823236	0.0123705	0.0435845	9.91547	9.09223	9.64059	9.5157	10.4011	10.3488	10.3299	9.50392	9.61462	10.34	10.2993	9.36561	10.8233	10.5203	8.07206	10.3229	9.52937	9.44969	10.2188	8.36977	9.98114	9.90684	11.0974	9.04315	8.45169	8.91233	8.69848	9.62033	9.8274	10.4892
CPNE2	0.925645	0.0184621	0.0567607	8.17806	7.25242	7.98987	7.30204	9.46631	7.94331	7.84686	7.48324	8.00014	6.26533	8.52599	8.84969	9.24011	7.76114	8.16009	8.72908	8.54633	10.0298	6.98626	8.6332	8.07804	8.26509	8.64514	6.67619	7.61527	6.53004	6.6131	8.3101	7.7698	7.17031
CPOX	0.915315	0.00640828	0.0277797	7.98067	7.06536	8.16683	8.52054	8.90164	8.23752	6.52201	6.58626	7.40162	8.0412	7.71448	7.41116	8.35596	8.54613	8.24406	8.33376	6.68514	8.41834	7.85114	8.90733	7.75198	8.485	7.74483	6.40749	6.93047	6.52341	6.70939	7.99758	7.82381	8.74782
CPPED1	0.736376	0.0130662	0.0453425	6.91435	6.17797	7.07578	6.75028	6.8644	7.3311	6.16794	6.92625	7.52016	5.91562	6.58985	5.712	7.37577	7.11126	7.68957	7.18591	7.26716	6.45079	5.86969	8.13972	6.07618	7.45194	7.37098	6.195	5.81456	5.81564	5.73493	6.92201	6.58568	7.27329
CPSF1	0.847713	2.61529e-05	0.00046941	9.12087	8.27316	8.96258	8.94618	9.17811	8.87189	9.204	8.64473	9.97327	9.1075	9.28691	9.0488	9.07516	8.65962	9.91299	9.14991	9.39097	9.07404	8.58447	8.96164	8.52657	9.65899	9.47546	7.92281	8.11357	8.63065	8.46344	8.19544	8.31305	8.96537
CPSF3	1.45135	1.01349e-06	3.83282e-05	9.04501	7.59366	9.05161	8.66953	9.20259	9.56374	9.40359	8.58941	9.2561	9.94825	8.82776	8.86363	8.16873	9.85786	8.67315	9.37374	8.13514	8.95073	9.37447	9.04339	8.71594	8.55628	9.61534	7.13178	7.02006	7.4841	7.14965	8.48882	8.28754	9.14924
CPSF6	1.57857	2.4497e-06	7.67798e-05	8.64214	7.06356	9.50467	8.27532	8.86533	8.81165	7.78242	8.29747	9.26585	8.47321	8.06693	7.58995	8.9523	9.05028	8.75737	8.49191	7.76994	8.76224	8.53818	8.39121	8.36583	9.22405	9.42231	6.55507	6.82553	6.35154	6.59353	7.99576	8.05995	9.46865
CPSF7	0.756628	0.00322205	0.0172486	9.24884	8.49221	8.89509	9.00068	8.82021	9.36561	9.0736	9.03796	9.5837	9.09812	9.64059	9.19735	9.38626	9.92152	9.64876	9.14333	8.57421	9.10321	8.9422	8.93544	8.6343	10.1516	9.15211	8.10134	8.26251	7.76189	7.90355	9.48288	9.44111	10.1686
CPT2	1.09826	0.000156536	0.0018592	8.42093	7.32267	8.14877	8.58561	8.01899	8.58703	8.30552	8.41628	8.3553	8.05267	8.10184	8.34944	7.31501	9.05119	8.52178	8.93149	8.98768	8.56426	8.01819	7.62812	9.46232	9.5061	8.46632	7.54574	7.06308	6.64986	6.60984	7.99812	8.0694	7.88656
CPTP	0.880311	0.000171631	0.00199321	7.45714	6.57683	7.29224	7.68957	7.33881	7.4641	7.41018	7.12032	7.46661	6.74475	7.26242	7.1626	7.81447	7.95689	7.34143	7.19243	7.02743	8.90503	7.04362	7.88626	6.98434	8.13454	7.27235	6.77564	6.59611	6.0554	6.35456	6.70077	6.97848	7.54666
CRABP2	4.24922	6.70624e-15	1.45222e-11	11.4028	7.15357	11.0702	10.2018	10.9586	11.1686	10.7845	11.3423	12.3978	12.1827	11.7633	11.7738	11.3893	10.5007	12.1319	12.0637	11.4067	11.3487	11.6688	9.8311	10.7589	12.4554	11.8206	6.91788	7.11244	7.09958	6.71975	7.28194	7.78987	11.842
CRCP	0.626409	0.000433996	0.00399017	7.29506	6.66865	7.31995	7.08865	7.24811	7.161	7.24194	6.95798	7.5256	6.69417	7.25348	7.45694	6.9239	8.19201	7.5824	7.47814	7.10864	7.65335	7.01875	6.89866	7.30993	7.4409	7.49423	6.54776	6.68777	6.41775	6.14879	6.97695	7.23289	7.44261
CREB3L4	1.39774	6.56573e-05	0.000958672	8.17748	6.77974	8.04762	8.1293	8.3553	8.15418	8.13771	7.20707	8.16351	8.00323	8.67271	6.45672	7.91337	8.31454	8.96917	8.58059	7.64075	9.10424	8.7475	6.79201	8.7497	8.44618	8.8212	5.92928	6.56187	6.46148	6.50984	7.50838	7.7076	8.49795
CRIP2	1.36863	0.000439308	0.0040286	7.80303	6.4344	8.309	8.73596	7.54158	7.77859	7.04141	7.4729	8.75982	7.37787	6.42593	6.58778	7.53742	8.20691	9.14157	7.79276	7.40583	9.50718	6.81585	7.02132	7.78651	8.18735	8.22428	5.47918	6.85378	5.69561	6.56999	7.05215	6.95571	8.00887
CRK	0.670306	0.00706724	0.0296803	8.94524	8.27493	9.33156	9.00696	8.58011	8.73282	8.14585	8.90503	9.44562	8.2712	9.03066	9.61693	9.81325	9.64702	8.57856	9.00776	8.68869	8.96164	8.78021	8.50025	8.58633	8.53501	10.0501	8.06513	8.16553	7.92048	7.68115	8.93908	8.87821	8.57967
CRLF3	0.924855	0.00156808	0.0102507	8.99767	8.07281	9.40884	8.77628	9.27595	9.71627	8.49514	9.28318	9.23516	9.24792	8.80297	9.45251	8.2736	9.18277	8.58199	8.93671	8.27761	8.06767	9.4556	9.53749	7.7738	9.16661	9.81982	9.16468	7.52536	7.68998	7.21357	8.63504	8.20825	9.18085
CRNKL1	0.733976	0.0434185	0.103481	9.24607	8.51209	9.48179	9.43175	8.70297	9.83766	8.50136	7.37635	9.23762	9.43819	9.19473	7.5436	9.71804	9.10689	9.30245	9.89689	8.97093	8.54857	10.9532	9.06779	9.33094	9.69168	9.90864	8.01336	8.66116	7.48324	8.35983	9.18841	9.36656	10.1715
CRTAC1	1.61996	0.023531	0.0672194	7.49314	5.87317	7.42049	9.1708	6.80447	8.9359	7.34792	6.03866	9.07105	10.2204	5.90849	5.8961	10.34	5.60337	8.60117	7.66561	5.7709	5.25291	7.8749	4.77298	6.5739	7.88656	7.48435	5.98705	5.72321	7.15213	5.89799	5.42088	5.05776	10.2082
CRTC2	0.649099	0.0455076	0.106937	8.47773	7.82863	8.59615	8.48298	9.26585	9.50856	7.6843	7.8858	8.60865	8.45897	8.34611	7.14455	8.57884	8.48464	9.04424	8.5404	7.30302	9.33997	7.74021	8.63552	7.65271	9.69907	8.84042	7.2166	7.08885	7.72145	7.50618	8.43634	9.00234	8.66902
CSE1L	0.889311	1.91974e-05	0.000368796	10.8592	9.96991	11.247	10.2985	10.9274	10.9034	10.4045	10.5648	10.6623	11.2298	10.294	10.3773	10.8784	11.5259	11.3257	11.4645	10.5839	10.3901	11.0773	11.4907	10.7571	10.7107	10.9455	9.98628	10.0884	10.2363	10.2025	9.75593	9.55004	10.8442
CSNK1D	0.772466	0.00424731	0.0208537	9.25118	8.47871	9.79637	9.40178	9.30385	9.54901	9.00234	8.93509	9.91299	8.16009	9.04474	8.98952	9.54132	9.43533	9.41349	9.29656	9.57819	9.15929	9.05388	9.23628	8.42529	9.40464	9.8526	8.09031	8.15881	7.50318	7.90015	9.35716	9.86266	9.03325
CSNK2A1	1.11454	4.50847e-05	0.000721355	8.62539	7.51084	8.58897	8.70496	8.20362	9.13501	8.46712	7.4156	9.05161	9.7435	8.51636	7.54428	8.9451	8.79064	8.71091	8.55268	8.9083	8.73988	8.81604	7.494	8.55471	9.12344	9.20138	7.31745	7.54764	7.23572	7.66641	7.58119	7.71664	8.55037
CSNK2B	1.07221	7.02409e-05	0.00100759	10.3572	9.28497	10.7571	9.6445	10.4337	10.9061	10.5345	9.59921	9.50856	10.3543	10.3504	10.322	10.7427	9.38115	10.7171	10.3022	10.5566	11.3986	10.6564	10.6424	10.2139	10.6776	10.1354	8.99005	9.45342	8.71632	8.73096	9.62301	10.1961	10.0236
CSRP2	1.35214	0.00459291	0.0220121	9.13377	7.78163	8.20318	8.94575	9.47348	11.0001	8.45897	9.33322	9.42673	10.2283	7.00974	9.45696	10.3931	9.60271	8.73096	9.8685	9.54346	7.74057	10.9337	8.24808	9.06308	7.97301	8.2091	7.27357	7.18853	7.28462	7.14281	9.30385	8.49642	9.10026
CST4	0.859564	1.55804e-06	5.34768e-05	7.97747	7.11791	7.78382	8.08072	8.01507	8.25746	7.83571	8.06693	7.5824	7.62442	7.78959	8.0374	8.39825	7.88852	8.24062	8.67764	8.17229	8.01664	7.88343	7.71023	7.81767	8.22101	7.91389	7.34966	6.8675	6.98626	6.58531	7.44155	7.47717	7.4907
CSTB	0.806192	0.0495506	0.113411	10.181	9.37482	10.6659	9.17028	10.3603	10.4821	9.94908	10.0921	10.8968	8.59145	10.446	9.60605	10.038	10.8295	10.8503	11.7876	9.44876	12.3549	8.6123	10.5977	9.21185	9.56857	11.0254	9.70395	8.94274	9.07309	8.68245	9.61044	10.2363	9.39735
CSTF2	1.10659	4.15834e-07	1.96576e-05	7.3521	6.24552	7.76731	7.36318	7.42861	7.78556	7.10539	7.01917	7.23524	7.6668	7.62699	6.8589	7.6128	7.77941	7.86226	7.67901	6.66773	7.43004	6.62797	7.31775	6.73376	7.24194	7.29276	6.12708	6.18435	6.04751	5.92375	6.62555	6.56485	7.64368
CSTF3	0.667308	0.00326531	0.0174017	8.78617	8.11887	9.01607	8.66116	7.96685	8.53884	8.54613	8.64377	9.46631	8.6968	8.84287	8.42466	8.9083	8.99914	10.0529	8.64151	8.41587	7.94331	8.7079	8.40641	8.79923	9.54346	9.50538	7.96616	8.13771	8.05806	7.97225	8.36053	8.21849	8.56896
CTB-31O20.2	1.05468	0.0241818	0.0685599	7.69542	6.64073	8.66312	8.29692	8.24671	6.78968	6.08197	7.0488	7.91101	5.71888	7.79084	6.97101	8.66953	8.04199	9.32585	6.97493	7.83027	7.62245	6.58088	7.14647	7.15854	9.35662	8.48917	6.1782	6.23859	5.42697	5.98477	8.06198	7.95389	8.58349
CTB-92J24.2	1.09608	0.0111032	0.0406099	6.68228	5.5862	6.15	5.35974	6.95111	8.0959	6.55398	6.73376	5.18092	5.53858	5.83743	6.54954	9.0051	7.42861	6.70951	6.27379	7.07109	5.42871	6.64453	7.94892	6.63554	6.17249	6.30461	5.89577	5.70222	5.21082	5.33246	5.58641	5.78952	8.43634
CTBP1	0.625601	0.00452896	0.0217923	10.184	9.55844	9.96283	10.0025	10.0725	9.55766	10.2843	10.2894	9.75828	10.4678	10.0868	10.1289	10.5227	9.79948	10.4253	10.1399	10.1238	11.1172	9.55127	9.58329	10.0107	11.0995	10.3543	9.34736	9.48468	9.21041	9.00366	9.98838	10.3162	10.7107
CTBP2	1.35818	1.56834e-06	5.36378e-05	10.6459	9.28772	10.7427	10.7171	11.0203	10.183	10.7406	10.1641	10.7656	11.1391	10.4411	10.2565	11.3257	10.7782	10.6309	10.3514	10.3841	11.1849	10.5943	9.98433	9.76825	11.3087	10.1874	8.69513	8.91687	9.37504	8.85009	9.57608	10.3131	11.5415
CTC-338M12.4	0.904622	0.00532207	0.0244502	7.21398	6.30935	6.8966	6.86163	6.49049	7.37018	6.23471	6.79641	7.77499	6.43807	7.4036	8.0887	7.57215	6.53125	7.38165	8.27252	6.96387	7.25469	6.52795	6.63209	7.69645	8.77628	6.75681	5.94415	6.09177	5.70547	5.92324	7.34701	6.84448	7.9864
CTCF	0.65665	0.0318649	0.0835897	9.09371	8.43706	8.66633	8.62266	9.34678	9.44237	8.49142	8.22134	8.93012	8.49868	8.89813	8.20499	9.78802	9.2815	9.49781	9.61637	8.54104	9.96836	8.84514	9.31378	8.78021	10.038	8.89003	7.29733	8.54613	8.03316	7.91044	9.17461	9.66069	10.1785
CTD-2124B8.2	0.798922	0.00758225	0.0312384	6.49742	5.6985	6.47546	6.57356	7.02918	6.19268	6.59189	5.51526	6.59075	5.50289	5.64821	6.09689	5.93181	6.50903	6.23613	6.4818	6.53321	7.08825	6.39488	6.78823	6.49569	7.47456	6.77391	5.1708	5.47972	4.97606	5.341	6.58863	6.63479	8.01899
CTD-2553C6.1	0.603554	0.000474625	0.00426194	6.09582	5.49227	6.2689	6.17044	6.0423	5.91921	5.65475	6.24961	5.76647	6.1154	6.09177	5.76939	6.67077	6.05248	6.12012	6.22008	5.81369	6.65839	5.65592	5.86359	5.61932	6.21623	6.20904	5.28116	5.26302	5.44462	5.45985	5.75427	5.75067	6.96015
CTDP1	0.686089	0.00637526	0.0276838	6.87745	6.19136	6.97577	6.71645	7.09449	7.55469	6.42648	6.46266	7.92649	6.35242	6.24386	5.84584	6.6753	7.31545	7.08431	7.00483	6.60217	7.39875	6.4158	6.77687	6.17969	7.5322	7.69905	5.7482	5.87755	6.12135	6.12793	6.65343	6.61972	7.02038
CTDSPL2	0.607577	0.00390096	0.0196335	7.34778	6.74021	7.17058	8.22973	6.84331	7.59711	7.35724	6.89244	7.81414	7.12517	6.85659	7.39255	7.55618	7.96138	7.3802	6.76397	7.04593	6.96125	7.26771	6.99006	7.71078	7.64576	7.68235	6.90367	6.74167	5.96842	6.324	7.28036	7.22312	7.40681
CTHRC1	2.9151	4.56855e-05	0.000728434	10.5813	7.66617	10.2249	8.66992	11.1206	13.1235	10.6177	11.5853	12.426	9.31136	9.73525	12.0667	9.9328	10.5934	11.488	12.3087	9.82462	9.91517	7.52475	11.6779	12.1051	8.33508	9.95512	6.25428	8.99166	8.68749	7.0152	6.69136	8.35702	10.246
CTNNBIP1	1.17235	0.000473901	0.00425711	9.0196	7.84725	8.87137	9.32809	9.12522	8.68423	9.55127	8.96204	9.77732	8.30865	8.66218	9.60672	8.11786	9.99845	9.22886	9.56285	8.61112	9.10948	8.15359	7.95354	8.03593	10.1083	9.0141	7.6668	7.66899	7.18794	7.07415	8.57884	8.90681	9.66011
CTNNBL1	0.833489	0.00250778	0.0144675	8.49667	7.66319	8.57884	8.61905	9.05218	9.22132	7.88756	7.44543	8.15774	9.57877	7.38255	7.90121	9.03014	8.82474	8.10088	8.84429	7.76161	8.4021	9.08001	9.04977	8.32553	8.42188	8.38937	7.44904	7.55929	7.4508	7.17639	8.04595	8.29765	8.87189
CTPS1	2.14382	1.78765e-08	1.79613e-06	8.40348	6.25966	7.98833	7.84137	9.59613	8.86285	7.28605	8.91666	8.965	8.62266	8.72708	7.75726	8.10718	9.72218	8.94274	7.92719	7.68235	8.41948	7.7598	8.32523	8.66388	8.97217	8.21027	5.58704	6.02458	6.21063	6.19539	7.01931	6.52098	7.58063
CTPS2	0.783312	0.000759302	0.00601348	8.22897	7.44566	7.75092	8.26971	8.71388	7.60679	8.42239	7.9839	9.03161	7.7738	8.20439	8.27532	8.06053	8.56629	8.02769	9.01713	7.65591	8.38874	8.51756	7.62783	7.74483	8.01462	8.53674	6.97018	7.48757	7.23087	6.91271	7.98625	8.08639	8.84682
CTSA	1.01792	0.00165833	0.010664	9.98766	8.96975	9.86541	9.2678	10.7819	11.1756	9.4144	10.1055	10.1758	9.30903	9.57682	9.3305	10.7792	9.89555	9.48774	11.0787	9.60672	9.99924	8.96347	10.4915	9.67034	10.7119	10.8711	9.23762	8.55865	8.59582	8.33066	9.26106	9.83468	9.17028
CTSD	1.1765	0.0215015	0.062966	7.97151	6.79501	8.31703	9.37175	8.57344	8.39299	7.48941	6.56938	8.08351	6.36487	6.70476	6.40122	8.2151	8.90078	7.46345	9.63986	7.89352	8.42529	6.15992	9.64757	7.32538	9.61803	8.60627	7.89599	5.80908	5.84882	5.86617	7.64133	7.70868	7.20974
CTTNBP2NL	1.20199	2.94461e-06	8.82997e-05	7.90241	6.70043	7.94092	8.11702	8.15312	8.02048	7.63768	7.35659	8.31173	7.36234	7.82861	7.74302	7.86703	7.62472	7.94614	7.27723	8.32795	8.49675	8.61154	7.35983	7.25215	8.09233	8.17436	6.80953	6.38831	6.00164	6.18543	7.51678	7.30086	8.35156
CUEDC1	0.929882	0.00170393	0.010896	8.28476	7.35488	7.72933	8.4175	9.00965	8.21551	8.86254	9.74818	8.95883	7.05524	8.58513	7.80865	7.87092	8.11197	7.57239	7.86733	8.07356	8.98871	7.81582	7.71448	8.22734	9.14284	8.24284	7.29296	7.08412	7.03184	6.90292	7.78053	8.03689	8.24601
CUL1	0.880269	0.00210774	0.0127243	7.64599	6.76572	7.47354	7.7191	8.10757	7.62442	7.1977	7.65794	8.26971	6.5773	6.12587	7.89883	8.38033	8.46344	8.23564	7.65232	7.12439	8.24928	7.13139	7.96782	7.5486	7.59405	7.79696	6.43494	6.68504	6.08704	6.40245	7.51333	7.47153	7.4156
CUL2	0.81968	0.000173191	0.00200435	7.62682	6.80714	7.52971	7.89944	7.67641	8.52526	7.44283	7.24653	7.71855	7.05687	7.24032	7.39679	7.53485	7.91859	8.07804	7.36412	7.5824	7.24284	7.3197	8.23815	6.93034	7.88773	8.13972	6.82525	6.51237	6.3504	6.45325	7.36776	7.33382	7.82091
CUL3	1.09948	3.41911e-06	9.85484e-05	9.9946	8.89512	10.099	10.248	9.74818	10.0306	9.739	10.1324	10.0688	9.33586	9.44294	9.70205	10.4139	9.83407	10.1715	9.9895	10.1306	10.4757	9.84752	9.92402	10.0373	9.97254	10.1919	8.66594	8.62036	8.1204	8.30937	9.902	9.75266	10.3457
CUL4A	0.937063	0.00205407	0.0124802	9.03931	8.10225	8.86642	10.0405	8.52357	8.32865	8.21963	7.98833	8.74831	9.11638	9.33934	8.1518	9.47348	9.50245	9.67773	8.91324	9.11252	10.0204	9.22772	8.69263	9.01019	9.93573	9.24753	8.00252	8.03858	7.29276	7.43268	9.04038	8.80655	8.72826
CUTA	1.06252	5.75969e-05	0.000876792	12.4612	11.3987	12.8869	11.9666	12.2087	13.0813	12.1559	12.0547	12.4033	12.3589	12.2361	12.4033	12.8321	11.6724	12.8791	12.8251	13.0162	12.5311	12.3235	12.6301	11.9891	12.8251	12.3549	10.7238	11.3487	10.6048	10.8711	12.3978	12.4461	12.5127
CUTC	0.84466	0.00127418	0.0088263	7.26346	6.4188	7.61191	7.23313	7.30516	7.32723	6.89785	7.85391	7.80943	6.91593	7.59122	6.51011	7.60758	7.56203	6.88511	7.87426	7.10449	7.23087	6.59611	6.53473	6.18847	8.1983	7.38438	6.26952	6.12415	5.98136	5.92093	7.30433	6.91249	7.57381
CWC22	1.29998	8.9565e-08	6.0272e-06	8.31524	7.01526	8.33508	8.27311	8.09654	8.10247	7.80226	7.92695	8.52811	8.34001	8.65195	8.45689	8.49945	8.44883	8.52845	7.80556	8.18026	8.66022	8.18368	8.20878	8.92314	7.98872	8.25746	6.72155	6.322	6.48432	7.09838	8.16248	7.30284	8.73733
CX3CL1	0.935382	0.00161602	0.0104743	7.06527	6.12988	6.69953	6.25643	7.32359	6.51959	7.24347	7.00597	6.83579	6.30815	7.71664	7.38943	8.75531	6.72906	6.76835	6.89033	6.7518	7.59178	6.56297	8.60512	6.85473	7.04859	7.05215	5.89675	6.05864	6.82525	6.01814	5.97988	6.00063	6.52706
CXADR	0.682146	0.0348336	0.0889899	10.6341	9.95193	10.9839	10.9707	9.99924	10.3457	10.1306	10.6203	11.0048	10.6214	10.5007	10.4678	10.8914	10.3763	10.9094	10.5738	11.7132	10.9503	10.4402	8.35783	10.7845	11.2726	11.0819	9.28372	9.17958	9.17419	10.2044	11.2508	10.6189	10.9532
CXCL13	1.31424	0.0431835	0.103214	5.66878	4.35454	8.18402	4.17846	5.01737	7.92838	8.10575	4.67104	4.09949	4.51433	5.98154	4.47104	4.07735	6.66132	5.04877	4.09949	6.50597	4.63508	4.04056	8.07206	4.33788	6.70876	7.79642	4.89569	4.44807	4.95353	4.02717	3.39006	4.41274	5.57811
CXCL16	1.08682	0.00728214	0.0303489	8.90422	7.8174	8.22833	10.1096	9.84752	9.02108	9.14669	9.7397	10.1562	7.25195	8.34611	9.99145	7.97206	8.66202	8.34944	8.02094	7.45622	9.37374	8.49751	9.80761	9.29945	9.7086	8.76298	8.8723	7.01093	7.22474	7.33172	8.30828	8.15642	8.14358
CXCL17	1.35174	0.038511	0.0953811	7.17307	5.82133	7.15805	6.37545	6.67696	6.41444	6.90225	6.31453	8.69817	6.21063	8.77948	8.58119	5.74248	7.34849	7.11307	5.70169	6.17724	11.8028	6.15506	5.74394	6.26393	7.21381	10.3555	5.78038	5.96032	6.20705	5.89709	5.49527	5.58787	6.07835
CXCR4	2.61532	9.59368e-06	0.000218088	10.1254	7.51007	10.3649	9.3916	9.40718	11.7387	9.18841	10.4592	11.0132	11.8452	10.8583	8.24358	10.7723	9.35113	11.5332	10.944	8.36909	9.23164	9.86024	8.174	10.314	9.67361	11.4272	9.6112	6.81674	7.58566	7.05027	7.29121	6.70531	10.5977
CXorf40B	0.670506	0.0498523	0.113914	8.56988	7.89938	9.40783	9.13716	8.87773	8.8771	9.62164	8.62085	8.71515	6.29049	7.83846	7.98191	8.15673	8.58513	8.94882	9.56374	9.29685	8.38431	7.71106	9.55998	8.6977	8.39273	8.16839	7.7298	8.27873	7.28138	7.46185	8.16117	8.48334	7.70367
CXXC5	1.67286	2.54106e-07	1.34894e-05	11.6058	9.93293	11.8923	11.2576	11.9193	11.1352	11.0236	11.9232	11.7839	11.9068	11.8399	11.9068	11.355	11.2816	11.2663	12.2678	12.152	10.8902	11.5554	10.6435	11.5586	11.7683	12.1888	10.4546	10.3733	10.5952	10.5873	8.87821	8.70915	11.8117
CYC1	2.21035	7.69161e-07	3.14819e-05	10.1408	7.93045	10.028	10.9034	10.477	9.56088	9.61044	9.34394	11.583	8.63651	10.3003	10.1207	9.18006	9.99677	11.4802	10.9986	10.1207	9.71481	9.77879	9.83766	9.6224	11.4722	11.2595	7.84475	8.08351	7.21516	7.31244	8.45249	8.67435	9.07196
CYCS	1.56854	2.45785e-08	2.25846e-06	10.6828	9.1143	10.4045	11.3192	10.3318	10.7336	10.4	10.9371	10.0133	9.97254	11.122	10.7747	11.2105	11.2646	10.3921	10.6952	10.6752	11.1756	9.96909	10.2836	10.3724	11.0356	11.4234	8.88113	9.09982	8.54355	8.98212	9.90448	9.27468	10.5164
CYHR1	1.08061	0.00203165	0.0123825	7.61988	6.53927	7.66418	7.81922	7.28858	7.07994	7.79713	7.14796	9.22308	6.53858	7.77966	7.281	7.87774	7.63058	9.19268	8.23853	7.55618	7.41787	6.51261	7.13501	6.39837	8.19806	8.18634	5.76579	6.31682	6.27522	6.18615	7.22373	7.46793	7.6741
CYP20A1	0.692058	0.0382032	0.0948938	6.62078	5.92872	6.52838	6.0253	7.45878	7.33809	5.42841	5.76046	6.83906	5.75514	5.79573	6.54714	7.59262	7.01779	7.32582	7.71479	6.18165	7.66531	5.50516	6.51557	6.30104	6.43741	7.32172	5.73284	5.57935	5.23045	5.575	6.94606	6.50864	6.60179
CYP27C1	0.58852	0.0208345	0.0615247	4.91768	4.32916	5.80641	5.27619	4.51879	4.7647	5.2488	4.36151	5.19875	4.12672	4.17235	4.36205	4.86766	5.55111	5.79511	4.60487	4.15663	4.87894	5.29073	5.43104	4.5723	4.9737	4.67902	3.91576	4.11681	4.03707	3.89061	5.20326	4.81145	5.55157
DACH1	1.94726	0.00683595	0.0290017	6.95759	5.01033	7.03922	4.61172	6.6824	8.3915	7.79464	5.93802	7.07005	8.92684	5.19097	4.56578	8.81165	6.99133	4.67832	8.89907	5.81642	7.9755	8.30796	4.09234	5.91996	9.17357	8.00991	4.00264	4.38838	5.11826	4.57088	5.21266	6.76917	8.17988
DAD1	0.647165	0.0326991	0.0850592	11.5914	10.9443	11.3487	11.8225	11.0974	12.5707	11.2073	10.4738	11.2806	11.249	12.3549	11.0001	12.5482	11.6451	11.2264	13.3556	11.7051	11.4139	11.2368	11.3087	12.1674	11.3704	11.5239	10.6237	11.0342	10.1648	10.515	11.583	11.745	11.1054
DAG1	1.65141	1.92952e-06	6.34074e-05	10.8096	9.15819	11.4933	10.8784	10.4855	11.0065	10.2788	11.6914	11.4349	9.99325	11.2283	10.8688	11.2016	11.0289	10.6711	10.5934	10.4813	10.6076	10.9237	9.87765	9.87087	11.0167	11.4661	8.25131	8.87342	8.3416	8.80884	10.3746	10.2993	10.7129
DANCR	1.11596	0.000768458	0.00606823	9.46547	8.34951	9.23935	10.2598	9.1895	8.85149	9.03988	9.66408	9.80674	9.93665	9.30903	9.19404	9.41655	9.16902	11.1663	9.43031	9.83027	9.13138	9.32809	8.72259	8.21993	9.95512	10.694	7.89277	8.77756	8.10932	7.79642	8.08472	9.43628	8.68632
DAP3	1.08019	1.67946e-05	0.000332119	9.24332	8.16313	9.06126	9.52937	8.83483	9.39965	9.02061	9.1588	9.18133	9.22196	9.33501	9.77879	9.15036	9.48621	9.90938	9.65104	8.71515	9.43293	8.87885	9.10026	8.88592	9.55959	9.17461	7.70273	8.23752	7.37439	7.4108	8.92587	9.32747	8.88721
DAPL1	2.01429	0.027436	0.0750252	9.33472	7.32042	10.9898	10.2306	9.40251	7.64807	7.55318	7.9924	10.5139	7.1998	10.2397	7.28494	6.87848	12.0947	12.7362	9.40178	7.24135	12.0484	7.28345	6.20102	6.79288	11.0819	12.1757	7.1998	7.58214	8.10999	7.59844	6.66398	6.7682	12.3732
DARS	0.852204	0.000178795	0.00205363	10.2089	9.35667	10.3514	10.4813	10.218	10.1585	10.2651	10.4253	10.0016	9.14669	10.7096	10.3626	9.48224	10.218	10.5265	10.7462	9.8505	10.5612	9.90819	10.0579	9.59472	10.2394	10.2853	9.0568	9.29139	9.13203	8.86828	10.0098	9.78173	11.0048
DBF4	1.80662	2.41563e-06	7.61288e-05	7.99764	6.19101	8.36763	8.24358	8.23592	7.91101	6.85235	8.71265	7.84739	7.76362	6.81308	6.98584	8.26806	9.12418	8.59921	7.54186	7.81237	8.80207	7.63902	9.09654	7.25294	7.78886	8.09348	5.44339	5.4886	5.85438	6.24279	7.62019	6.49674	8.1963
DBI	1.16496	0.000157443	0.00186647	10.7723	9.60732	11.0633	11.276	11.0836	10.7394	10.9323	11.0392	10.3961	9.79637	10.8279	10.6295	10.4614	11.1352	11.2016	11.2227	9.81672	11.5361	10.6549	11.0289	9.5363	11.1686	11.3257	10.1741	9.44969	8.78712	8.59724	10.3318	10.304	10.1184
DBN1	1.27032	0.000156727	0.00185991	8.49531	7.225	9.2561	7.89078	9.5864	9.26557	7.20707	7.38844	8.48769	8.80444	9.18181	7.8685	8.6557	8.03524	9.08045	8.58941	8.29167	8.29563	8.75142	7.34966	8.08905	9.7086	8.40101	6.67741	7.1294	7.35068	6.96125	7.35633	7.8749	8.71226
DBNDD1	0.707772	0.00582394	0.0260439	6.11109	5.40332	5.69801	6.20164	6.29746	6.03021	5.49192	5.17598	5.63689	5.82183	5.80039	5.33235	5.8822	7.08344	6.77993	6.88549	5.90786	6.45142	5.92737	6.54311	5.68618	6.94544	5.8598	5.04073	5.37297	5.44646	5.02244	5.67211	5.8652	7.00507
DBNDD2	0.934114	0.017641	0.055143	9.38244	8.44832	9.6421	9.79797	10.7682	10.075	9.72912	9.02587	8.10184	9.44969	8.64992	8.40132	8.96119	8.86642	9.56599	10.5503	7.52607	9.1075	8.86591	10.5849	8.22864	10.8984	10.4813	8.16553	8.83246	8.45212	8.3355	8.50025	8.40406	9.13602
DBNL	0.965722	0.00102391	0.00755221	8.32368	7.35796	7.88738	8.55908	8.50671	9.02936	8.56176	8.9045	8.61985	7.85417	8.38702	7.175	9.33809	8.78226	8.40049	8.97819	7.9918	8.91742	7.14473	7.88773	7.68802	8.39364	8.29382	7.79152	7.10365	6.70876	6.71365	7.64523	8.18493	7.8199
DCAF12	0.65809	0.0198092	0.0595265	10.2346	9.57652	10.6087	10.5214	10.248	10.2315	9.33194	10.4103	9.53192	10.2222	10.6967	10.1919	10.2853	10.0071	9.71945	9.41188	10.5094	11.2576	9.8055	9.45778	10.5064	11.3931	10.7029	9.7397	9.26431	8.87759	8.70915	10.2922	10.5762	10.1104
DCAF12L1	1.60574	0.00649243	0.0280226	6.59219	4.98645	6.06395	8.25671	6.31491	7.30391	6.61737	6.11086	5.13791	5.11868	6.48332	7.31484	5.65202	8.20407	5.45857	5.53342	6.79874	4.54403	9.6531	6.16225	8.54938	4.75065	6.38315	5.23589	4.74785	5.32664	4.70933	4.65436	5.24465	8.61636
DCAF13	2.09291	1.54139e-10	3.51787e-08	10.0427	7.94976	9.68236	10.075	9.48224	9.66144	10.0133	9.19549	10.059	9.88114	10.718	9.37832	9.97781	10.1758	11.0737	10.137	10.5398	10.4239	10.1902	9.67822	10.0492	10.1415	10.3162	7.72647	7.77966	7.35951	7.38062	8.78559	8.66674	10.0893
DCAF17	0.635686	0.00412867	0.0204291	6.17686	5.54118	5.88796	5.98428	5.97643	5.87812	5.67174	5.55526	6.48919	5.56093	6.01823	5.54254	6.6824	6.95838	6.35695	6.06637	5.94445	6.54126	5.77573	6.53182	6.33661	6.58746	6.93047	5.53193	5.1837	4.95772	5.45447	6.22087	5.89837	6.61438
DCBLD1	0.721472	0.0285402	0.0770513	6.72257	6.0011	7.32239	5.98118	6.67496	6.87359	5.74583	6.40236	7.17464	5.70758	6.78968	6.55161	6.77133	7.88343	7.06727	5.78372	5.76118	7.63829	7.51727	7.04017	5.76527	6.99029	7.10365	6.18723	5.20693	5.07859	5.86047	7.21312	6.46028	7.35091
DCDC2	2.59158	1.56062e-05	0.000314882	7.32186	4.73028	6.70014	7.08254	6.15731	8.91794	7.9998	6.41974	6.4635	5.74565	7.16275	6.58684	8.14915	8.13315	8.35596	7.68998	9.22612	4.90549	9.00011	5.53693	7.66021	7.61838	6.24551	4.7298	4.88582	4.60559	4.1647	5.34424	4.6515	9.32368
DCK	1.19277	0.00150807	0.00998109	8.54021	7.34743	8.35156	8.35565	8.20115	8.48283	7.66531	8.21924	9.24322	8.41027	6.9481	7.83709	9.52858	8.06903	9.39735	8.77252	8.93955	8.66706	8.1678	10.1884	7.59734	9.3496	9.37832	7.95405	7.23836	6.34682	6.48413	8.31503	7.7462	8.11456
DCUN1D1	1.44104	9.42486e-06	0.000215641	8.06413	6.62309	8.25385	8.01819	8.00794	7.83122	7.11468	7.51079	7.28007	7.20143	9.09201	8.26146	8.82941	8.98083	8.19806	7.85795	7.70393	8.26971	8.56629	7.44856	7.84534	8.91113	7.72018	6.62779	6.08331	5.99025	6.17005	7.51623	7.35091	8.50781
DCUN1D5	0.919346	0.000421822	0.00390582	8.29348	7.37413	8.17089	8.53755	7.86045	8.63985	8.39509	7.87353	8.26582	8.39336	8.04938	7.19828	8.89907	8.79184	9.53421	8.29813	7.44904	8.59333	7.51162	8.20856	7.88685	8.95423	8.72908	7.26168	7.45113	6.98982	7.10791	7.93516	7.49909	8.21639
DDAH1	0.736624	0.0142839	0.0479541	8.76487	8.02824	8.19565	9.00455	7.88794	8.64074	8.32408	8.59724	8.64235	9.32954	7.66641	9.15929	8.51426	8.513	8.28309	9.34831	9.06834	8.63737	8.97266	9.07309	9.62164	9.84511	8.16377	6.81944	7.50889	7.72886	8.16198	8.71957	9.23072	9.33862
DDB1	1.17462	3.11304e-05	0.000539185	10.9118	9.73722	11.1027	11.279	10.5034	10.982	11.3274	10.0893	10.791	10.5826	10.5999	10.3952	10.9787	11.4621	11.5873	11.5163	10.0079	11.0773	10.6023	10.4726	10.7171	11.5332	11.1595	9.80249	9.63774	8.94045	8.95369	10.3085	10.7805	11.2937
DDIAS	1.15971	5.67763e-06	0.000144498	6.92452	5.76481	7.1127	7.13876	6.86879	7.26627	6.04588	6.68097	6.96591	6.85784	6.819	5.79915	7.56442	7.49211	7.6853	6.70244	6.73141	7.36869	6.51174	7.54288	6.13085	6.86356	7.23587	5.93596	5.69824	5.30882	5.90106	5.92403	5.82075	6.95489
DDOST	0.800171	0.000902872	0.00686531	11.2456	10.4454	11.2336	11.4661	11.3274	11.9434	10.591	10.9337	11.1352	11.8628	11.5332	10.6113	11.5993	11.3873	11.5554	11.1391	11.2187	11.6508	10.8503	10.7322	10.4329	11.3951	11.1192	10.1425	10.3773	9.84752	9.78402	11.247	11.2744	11.6854
DDR1	1.67252	1.03179e-06	3.88917e-05	11.867	10.1945	11.8151	10.5447	11.8399	12.1286	12.101	12.6183	11.4412	11.247	11.7683	12.2361	12.4996	12.0517	11.5497	12.2051	11.9137	12.3653	11.9728	11.2227	11.9549	12.3127	11.5124	8.98919	10.0421	9.56791	9.90938	11.0218	11.6366	11.7738
DDRGK1	1.28979	0.000927437	0.00699168	9.83463	8.54485	10.237	10.3977	10.0125	10.4535	9.32049	8.4422	11.0274	9.48179	9.74422	8.14428	10.4128	9.37374	9.47283	10.9898	9.95137	10.2334	8.72954	8.85979	10.1006	10.8902	10.7224	8.36187	8.3373	7.8685	8.02003	9.30022	9.38115	9.36444
DDT	1.48021	0.00928633	0.035754	7.83374	6.35353	9.14333	7.52592	8.2608	7.46648	6.39084	6.42985	8.46197	6.96312	9.69836	5.86846	8.3766	7.58318	8.59195	8.46373	6.76087	8.84287	6.48242	8.32083	5.39125	10.3237	9.15929	5.5722	5.81621	6.01243	5.8301	7.43437	7.4559	7.8365
DDX11	0.716295	0.000409387	0.00382006	7.1647	6.44841	6.75604	6.95339	7.07927	8.00954	6.53813	6.83027	7.01356	7.42049	6.97225	6.70988	7.36209	7.40873	7.02006	7.45524	6.60414	6.96796	7.28828	7.37741	6.85342	7.85699	7.45326	6.36023	6.40165	6.08654	6.13558	6.75128	6.95518	7.69308
DDX21	1.71721	1.32758e-08	1.44102e-06	11.1752	9.45799	11.0663	11.2726	10.8914	10.9576	10.6637	10.7712	11.6884	11.5586	11.0633	10.4592	12.4505	11.6508	11.7534	10.9972	10.7682	11.1073	10.7589	11.5009	10.4953	11.3042	11.468	8.97481	9.20987	8.85931	9.76146	10.1733	9.76917	11.2073
DDX23	0.731453	0.00670117	0.0286507	8.04291	7.31146	8.20983	7.9644	8.50136	8.58476	7.8613	8.38516	8.40874	8.83246	7.08966	6.73385	8.65744	8.22184	8.47372	7.82861	7.24284	7.55962	8.40509	7.55003	7.97457	7.93757	8.46513	6.81469	7.40044	6.70704	6.86264	7.94386	8.14008	8.05605
DDX27	1.2917	1.25129e-06	4.48037e-05	10.0041	8.71239	10.2815	9.95332	9.94075	10.1399	9.7397	9.21757	9.69073	10.7298	9.73048	8.81344	10.2773	10.6859	10.469	10.4702	9.55959	10.1979	9.93717	10.3555	9.72218	10.0884	9.7548	8.64235	8.46166	8.31883	8.26251	9.15968	9.42929	10.3346
DDX39A	1.81197	1.26615e-05	0.000268734	10.0094	8.19741	10.1251	9.28887	10.7311	10.4427	8.60185	9.63379	8.9385	10.6872	10.0474	8.9523	10.2111	11.3524	10.5952	9.66894	9.41349	11.2776	9.61934	10.0161	9.57264	9.25699	12.0184	7.87774	7.95187	8.36849	8.14247	8.53527	8.30865	9.75553
DDX41	0.919036	0.00170652	0.0109095	9.09263	8.17359	9.13602	9.7339	10.4253	9.10536	8.11909	8.45374	9.2815	8.79702	8.80519	9.11138	8.18913	8.52392	9.32333	9.77195	8.50671	9.21435	9.02868	8.40242	9.60271	10.1354	9.14113	7.91669	8.61675	7.54754	7.78262	8.15979	9.01815	9.22964
DDX49	1.54534	1.92755e-06	6.34074e-05	8.5428	6.99745	8.99811	8.45856	9.62365	7.78242	7.25495	8.63885	8.23052	8.61835	8.04271	7.96202	8.73733	9.42355	8.88348	8.30576	8.15282	9.71945	7.78001	8.70297	8.47294	8.84008	8.59267	6.86074	6.80429	6.54537	6.57486	7.59097	7.60851	8.72031
DDX55	0.867861	0.001985	0.0121728	6.66707	5.79921	7.22906	6.75565	6.02273	7.20215	6.35685	6.04797	6.25736	6.73036	5.81939	5.92775	6.83283	8.11068	6.97977	6.9408	5.5168	6.74167	6.55351	7.08739	6.34998	6.82027	7.19211	5.52273	5.57238	5.46187	5.53318	6.4867	6.21842	7.20055
DDX58	0.627754	0.0373144	0.0933575	7.57058	6.94283	7.68034	8.20115	8.24601	7.85475	7.8825	7.03023	7.98121	6.30681	7.84628	7.98121	6.67996	7.08523	6.88182	6.65158	7.15075	8.81736	6.70356	8.16117	7.30627	8.28543	8.55595	7.21799	6.99445	6.66321	6.39488	7.29976	7.08668	7.26323
DEFB1	3.01236	0.000401598	0.00377044	8.64153	5.62916	9.86197	6.76917	9.23628	8.1249	7.13624	7.49801	12.2792	7.59405	9.65394	10.8647	6.03702	8.74478	11.1206	9.85927	9.04474	11.0759	6.65067	5.28975	10.4624	6.19994	8.99062	5.35264	5.40478	6.31099	5.18769	5.5878	5.93108	7.61953
DEGS1	0.912979	0.04805	0.111094	9.6952	8.78223	9.01472	11.8088	9.07714	9.95869	9.00736	11.0065	9.7435	7.16496	9.90609	10.567	9.60104	10.5762	10.0228	10.7336	8.03621	8.99559	8.02804	10.4103	8.96614	10.568	9.80249	8.80959	8.86968	8.26607	8.1948	9.4191	9.13413	10.2993
DEK	1.17985	7.0395e-05	0.00100917	12.4893	11.3094	12.9271	11.7387	11.8354	12.6411	12.34	11.1982	12.2746	12.4915	12.4033	12.6922	12.97	12.6538	12.3695	11.4437	12.6986	12.6823	13.2807	12.8726	13.4046	13.0255	12.0135	11.4098	10.7348	10.7571	11.03	12.1863	11.7387	12.8075
DENR	1.23188	1.8361e-05	0.000357532	10.2865	9.05464	10.7037	10.1543	9.67773	10.5129	10.3092	10.2903	9.96131	10.3457	10.1136	9.30128	10.3746	11.2806	10.2532	9.94649	9.84045	9.48288	10.6358	10.3784	10.791	10.6076	10.6752	8.58158	8.85653	8.70447	8.18332	9.98693	10.015	10.6671
DEPDC1-AS1	0.815668	0.00185734	0.0115667	3.66656	2.85089	3.7972	2.82189	3.91071	4.03602	3.6204	4.04718	3.80545	3.49862	3.44631	3.09964	3.58783	3.13891	5.35412	3.7869	2.80767	3.73526	2.97983	4.03796	3.11746	4.45432	3.69724	2.71319	2.92544	3.15866	3.04751	2.74489	2.51565	3.88339
DEPDC1B	2.91315	3.64714e-08	3.11304e-06	7.65895	4.7458	8.96081	7.49636	7.42673	8.00432	5.79143	6.25153	7.13194	8.87943	8.25885	6.4008	8.20047	7.36983	8.31703	8.73505	7.28732	6.48078	8.00465	8.13938	6.28372	7.33251	8.76726	5.2264	4.43335	5.02158	4.34192	4.78705	4.66453	8.97671
DEPTOR	1.635	0.000126657	0.00158964	9.00529	7.37028	8.67675	9.41655	9.31435	8.19334	9.52717	9.36444	9.2169	6.87788	9.36195	9.06896	9.10795	8.65054	8.90078	10.9034	8.20856	10.4139	7.90394	8.7252	10.1884	7.72278	9.30626	7.10939	7.40979	7.4516	6.67556	7.42951	8.14585	9.0663
DERA	0.645545	0.00912927	0.0353371	9.43506	8.78951	8.42878	9.35808	9.94975	10.0098	9.7075	10.6164	8.62713	9.46776	9.56729	10.2072	9.22132	9.01647	9.41987	8.76091	9.2735	8.85653	9.6343	10.0667	9.2979	9.70273	9.11138	9.16787	8.63885	8.28083	8.44325	9.11207	9.0942	9.27003
DERL1	1.09821	1.6347e-05	0.000325234	9.36101	8.2628	9.31994	9.11596	8.7721	9.0568	9.5	9.32422	9.87042	8.67026	10.205	9.33156	9.38346	8.96164	9.85786	9.33156	10.1261	9.01994	9.26266	10.3318	9.12461	8.6377	9.69434	8.32052	8.56356	7.65967	7.84628	8.50745	8.67929	9.04424
DESI2	0.640897	0.000427284	0.00394523	8.20713	7.56624	7.97008	8.05971	8.11038	8.93631	7.67222	7.64385	8.49977	8.48967	7.97969	7.63058	8.31357	8.58941	8.57768	8.14745	8.23414	8.78755	8.20439	7.76582	8.29081	8.16377	8.32229	7.27741	7.73379	7.57422	7.16079	7.95289	7.69832	8.1678
DGAT1	2.11229	1.40091e-06	4.94643e-05	8.37985	6.26755	8.46251	8.66473	8.91876	8.14954	7.58774	6.84592	10.2453	7.65692	8.32052	8.09423	8.50642	7.76512	9.17958	9.25492	8.64721	9.10536	7.49268	7.64797	8.01739	8.91071	9.32585	5.83425	6.00664	5.48735	5.83627	7.23132	7.20949	7.55726
DGKQ	0.655422	0.0098401	0.0372566	7.22499	6.56957	7.10563	7.0282	7.32567	7.00078	6.46359	6.81968	7.04808	6.78165	7.18734	7.25195	7.38943	7.30909	7.26996	7.33172	7.19661	7.91798	6.32339	8.12169	6.84667	8.58513	7.46308	6.17486	6.33711	6.11651	6.08805	7.22634	7.47456	7.18249
DGKZ	0.868092	0.0104905	0.038904	7.11902	6.25093	7.30404	7.56992	7.21179	7.78092	6.81441	6.51209	7.74658	6.26759	6.92229	5.79236	7.75351	7.66248	7.50632	7.63386	6.4772	7.83513	6.05339	7.24019	5.82005	7.9751	8.01851	5.63832	5.74583	5.97825	5.82183	7.05943	7.26191	6.72076
DHFR	1.28994	8.08298e-05	0.00112561	8.51338	7.22343	8.83665	8.76625	6.91062	8.46824	8.91555	8.0009	9.34394	8.58745	7.89599	8.52293	8.75235	8.79779	8.70404	9.52553	8.46854	7.50481	8.76383	7.49237	8.30828	8.05496	8.82075	7.69308	7.07415	6.98114	6.76741	7.4508	7.37403	9.8526
DHPS	0.795455	0.0044499	0.0215115	8.37322	7.57777	8.11772	8.88113	8.51133	9.50718	7.28194	7.49045	7.9294	8.96917	8.16813	8.10057	8.09965	8.97819	8.77491	7.98609	8.741	8.6377	8.27906	8.55698	7.39968	8.21226	9.18392	7.28961	7.60705	6.99361	7.0725	8.04901	8.45481	8.40438
DHRS11	1.33849	6.17202e-05	0.000916742	7.04966	5.71117	7.83222	7.05634	7.06526	7.53742	5.92556	6.55237	7.16173	6.41929	6.66606	6.81653	7.51162	6.73126	6.64288	7.68235	7.57514	6.1584	7.0725	7.03396	6.45488	8.57535	8.31025	5.3612	5.49688	5.43455	5.53421	5.99695	6.44325	6.31125
DHRS13	1.00354	0.000741464	0.00591105	8.34558	7.34204	9.16622	7.79207	8.26251	7.69674	7.9948	9.62913	7.53883	9.08001	8.42782	7.98907	8.92729	7.85731	7.40204	8.64557	8.14392	8.31229	8.80444	7.47888	8.60313	8.80959	8.88973	7.281	7.28933	8.35199	7.37763	6.94308	6.80923	8.15136
DHRS7B	0.987796	0.0432991	0.103358	7.5704	6.58261	7.47717	7.08143	7.52672	8.02867	7.04752	6.3895	7.7239	6.38604	7.29478	6.37184	6.82414	7.4559	7.27922	9.23124	7.19555	7.95289	7.48674	7.49773	7.69964	6.95684	11.9193	6.42017	6.53041	6.18088	6.2055	7.44928	6.70939	7.72211
DHTKD1	1.2536	3.18519e-05	0.000547948	8.25932	7.00573	8.37258	7.71178	8.01684	8.6419	8.1048	7.49551	7.59824	7.20682	7.26146	8.79745	7.50496	7.9254	8.42979	9.13602	8.89813	8.57535	8.3531	8.60893	8.8282	9.29046	8.90367	6.84574	6.62862	7.49801	6.98701	7.13139	6.9436	8.04377
DHX16	0.820152	0.0050019	0.0234467	8.47948	7.65932	9.17707	7.54843	8.81469	9.43031	7.5921	7.56186	8.11197	8.2255	8.20303	7.93358	8.4871	9.22346	8.46092	8.58777	9.03222	9.18133	8.69075	8.99811	8.26054	8.78469	8.14954	7.03913	7.45662	6.79106	7.56745	8.48579	8.61589	8.09348
DHX30	0.651856	0.0439731	0.104444	7.33102	6.67916	7.94473	7.69645	7.90355	7.8685	6.84246	6.87314	7.83846	7.06086	6.4865	6.39309	8.17898	7.15885	7.81713	8.06513	6.27606	7.87455	7.05223	7.28586	5.87565	7.53717	7.98028	5.91996	6.36023	6.04687	6.33982	7.41992	7.98819	7.27284
DHX33	0.731575	0.00380332	0.0193163	8.77193	8.04035	9.44612	8.19772	9.03796	8.74934	8.01776	9.34517	9.08805	8.99005	8.6295	8.46045	9.5207	8.91071	8.24671	8.54613	8.31173	8.72259	9.04339	8.94965	8.08103	9.16726	8.24217	7.48107	7.8365	7.41435	7.6839	9.09921	8.72708	9.27819
DHX36	0.666303	0.0192615	0.0584797	8.38863	7.72232	8.56736	8.24671	8.33229	8.25922	7.73158	6.94291	8.45721	8.32795	9.60421	7.74723	8.63388	9.11702	9.00965	8.08949	8.73988	8.5105	8.90037	7.75762	8.06078	8.58476	8.09897	7.23875	7.09748	7.1998	7.53934	8.62854	8.63003	8.83017
DHX9	1.3576	7.30729e-06	0.000177667	10.789	9.43142	10.4922	10.725	10.0016	10.7532	10.8968	10.5034	10.6032	11.2092	10.8661	10.8635	10.6062	12.1757	10.8523	10.5118	10.7819	10.4933	11.4412	9.9159	11.2836	10.7873	10.8347	9.2633	9.43031	8.42158	8.7252	10.2241	10.5241	10.7602
DIABLO	0.84189	0.00176212	0.011162	10.6176	9.77573	11.5304	10.8052	10.5721	11.4412	10.4546	10.8279	9.56791	11.1998	9.98693	9.81325	10.6459	11.7559	10.6579	10.4337	9.98838	10.2639	10.6295	10.6689	10.8887	10.3439	10.4738	9.14826	9.68325	9.50772	9.43231	10.3003	10.5826	10.6379
DIAPH1	0.774666	0.00047631	0.00427204	8.18788	7.41322	8.19903	8.79779	8.51554	7.9755	7.89277	7.86568	7.84799	7.64852	8.44181	9.33501	8.70447	8.24217	7.86991	8.98388	7.7587	7.51605	7.80586	8.04727	7.8749	8.23052	8.13849	7.76762	7.15047	7.44979	7.08769	7.55427	7.46945	8.44151
DIAPH3	0.890652	0.0270786	0.0742808	6.5869	5.69625	6.84266	7.34313	6.38466	6.56745	5.64594	5.99751	6.38466	6.51588	5.9104	5.92663	6.76938	7.08122	7.49106	5.96821	5.77037	7.48381	6.65301	7.39899	5.56499	7.39283	7.32927	5.25315	4.66934	4.97019	5.72232	8.59228	4.97019	6.4897
DIMT1	0.679984	0.00473701	0.0225328	8.67355	7.99357	9.1067	9.33501	8.39692	8.41065	8.35702	8.1048	8.38756	8.26931	8.63611	9.69367	8.65848	8.93363	9.19922	8.99107	8.08603	8.85009	8.76726	8.21849	8.60338	7.86665	8.49795	7.80802	7.75038	7.43161	7.65591	8.79257	8.52293	9.44817
DIP2A	0.677244	0.0156453	0.0510408	8.7663	8.08905	9.0663	8.47114	8.30765	8.73202	8.34524	8.98124	8.61869	8.71957	9.1366	9.47495	8.59582	9.31496	8.24481	8.66038	8.14606	9.16468	8.81955	7.75003	8.93932	8.93955	8.8723	7.67708	7.55237	7.22723	7.39615	9.28476	9.39672	9.55766
DIP2B	0.977872	0.00543627	0.0248309	8.1242	7.14633	8.04199	7.36802	8.79442	9.34336	7.42587	8.31106	8.6123	8.44292	6.95204	6.63919	9.20767	9.14237	8.18806	7.82888	7.48275	8.44245	8.37957	7.42782	7.64601	7.39537	8.84865	7.27304	6.81781	6.52228	6.58592	7.67641	8.00252	8.81165
DIRAS2	2.06245	0.00185486	0.0115606	5.79269	3.73024	5.18237	4.05088	5.87681	6.34622	4.21171	6.98927	6.18258	3.55984	5.13013	4.08912	7.7679	6.76976	7.03966	7.83967	6.61281	6.03404	4.8804	3.63031	4.09422	8.9241	5.18286	3.58664	3.14841	4.45347	3.35589	4.0704	3.76661	7.04443
DIRC2	0.839922	0.00295647	0.0161828	7.78319	6.94326	7.71797	6.85036	8.54477	7.6853	7.22525	7.75062	7.93652	7.09958	8.19903	7.47354	8.95936	8.24567	8.19945	8.42239	7.05974	8.18561	7.02404	7.75285	7.79623	8.15435	7.47977	7.51623	6.55452	6.09014	6.39441	7.74929	7.35499	7.46771
DKC1	1.41986	2.89003e-07	1.49264e-05	10.0795	8.65963	10.3229	10.5922	10.1785	9.89005	11.0187	10.5367	10.0978	10.0057	9.32333	9.36989	9.86768	10.6898	10.3724	10.3952	10.014	9.70395	9.72744	10.8661	9.2678	9.52553	9.79579	8.31139	8.78112	8.32795	8.41121	8.93064	9.19549	10.1874
DKFZp451A211	0.840201	0.000367271	0.00355313	6.66389	5.82369	6.45284	5.96282	6.31734	6.56974	6.18154	7.55991	6.47776	6.6332	6.52872	7.34814	6.67216	7.65871	6.3062	6.31213	6.58355	7.08739	6.87042	5.90162	7.31804	7.21547	6.10506	5.67485	5.83253	5.73018	5.72891	5.92023	6.0554	6.54275
DLD	1.14739	0.000452762	0.00411079	9.58292	8.43553	9.75037	10.1055	9.17242	9.88882	8.96036	9.71108	9.75266	8.23938	8.38105	10.2131	8.99504	10.4967	9.10216	9.82958	9.16622	10.2505	9.82891	9.89823	9.71355	10.0805	10.0468	8.10818	8.40085	7.51754	7.75677	9.68157	9.14826	9.2412
DLEU1	0.895208	0.000934666	0.00703459	6.71804	5.82283	6.56167	7.90075	6.46368	6.4837	6.06645	6.56839	6.55958	6.83256	5.87013	5.99617	6.95381	7.06847	7.82668	6.29239	6.43817	6.89547	6.70647	7.57727	6.5294	7.09177	6.91519	5.59501	5.3347	5.57524	5.4756	6.604	6.35242	6.19868
DLGAP5	3.69033	9.71038e-13	5.28985e-10	8.80544	5.11511	9.52553	8.43294	9.14384	9.1329	7.82198	8.46264	8.88505	9.70323	7.94135	8.46792	9.30772	8.60074	9.03014	7.88488	9.2132	9.32648	8.47207	8.86702	7.4806	9.08951	10.2241	5.67363	4.38664	5.91787	4.56881	5.89058	4.25315	8.70585
DNA2	2.46192	2.13439e-08	2.0433e-06	7.8781	5.41618	8.43732	7.49687	7.63801	7.55726	6.88488	7.87966	8.2552	9.15605	7.61405	7.02107	9.78461	7.61405	7.08222	7.36513	8.4357	7.46495	8.95679	8.42239	7.24311	8.29974	6.61832	5.24974	5.21035	5.46819	5.27856	6.16506	5.12518	8.09092
DNAAF2	1.46208	2.46055e-05	0.000450019	7.28416	5.82208	6.60845	8.04574	6.99527	7.49611	7.15549	6.0268	6.68767	7.50057	6.41895	6.50885	7.05872	8.52845	8.08775	7.51369	7.43861	7.68869	7.13089	6.4158	7.42607	7.85503	7.80786	5.38603	5.44863	5.3737	5.36694	6.95551	6.40165	7.856
DNAH14	1.0503	0.000666426	0.00548697	5.05385	4.00355	5.21305	5.16151	5.32185	5.65825	3.94595	5.5009	4.30888	4.84576	4.67236	3.96225	5.67898	5.91679	5.36791	5.90341	4.27063	5.84226	4.31792	4.54008	4.34779	6.24303	5.21188	3.91327	3.93639	3.96804	4.22871	4.00346	3.97144	4.95329
DNAJA1	0.782612	0.000370451	0.00357482	11.5668	10.7841	11.6805	12.2264	11.4119	11.7559	11.583	11.432	11.745	10.8248	11.852	11.9891	11.7185	10.8968	11.1557	11.5759	11.8767	12.1593	11.3172	11.3102	11.1849	11.8741	11.935	10.3356	10.8699	10.2522	10.4602	11.4165	11.3704	10.9639
DNAJB1	1.51109	3.86731e-05	0.000639798	9.51366	8.00257	9.42436	9.88019	10.884	9.68325	7.97121	8.80553	8.89509	8.93012	9.09654	8.79821	10.1853	11.1816	9.17618	9.12185	9.66471	9.6899	9.09867	9.86089	9.38673	9.14192	10.7362	7.4508	7.86012	7.7837	7.95785	8.39825	8.56468	9.68794
DNAJB11	1.23718	1.17871e-05	0.000253467	9.69745	8.46027	9.61863	9.37648	10.2788	9.71167	9.50672	8.7667	8.95073	8.99758	10.3724	9.76427	10.6579	9.38024	9.62301	9.14431	10.1812	9.40409	10.2363	9.17461	10.5583	10.3022	9.24706	8.40473	8.32632	8.01739	8.53856	8.93671	8.53793	10.0908
DNAJB2	1.02092	0.00152547	0.0100567	8.9675	7.94658	8.69421	9.00234	9.57682	8.36312	8.18332	8.72178	9.60787	8.02525	10.1194	9.41062	8.71435	8.23515	8.63041	9.83027	10.0868	9.47781	8.41471	9.4503	8.48334	9.09982	8.68483	8.14167	7.69674	7.43832	7.00876	8.29127	9.10272	8.47255
DNAJC10	1.29111	1.75376e-05	0.000343839	8.84855	7.55743	8.49868	8.42938	8.65007	9.02323	8.4871	8.10505	8.88113	8.34762	9.26266	7.84432	9.38713	8.39085	9.31496	8.69977	8.88208	9.15968	8.72908	8.84165	9.53342	9.22346	9.36444	7.32216	6.99383	6.75921	7.23383	8.94575	8.08983	9.61226
DNAJC2	0.708389	0.00179468	0.0112952	8.28835	7.57996	8.72178	8.6557	8.51898	7.76994	8.49911	8.58236	7.92575	8.09616	7.69549	8.7332	7.79432	9.43407	8.49293	7.86756	7.73336	8.68869	7.80133	8.837	8.06554	7.92018	8.21523	7.58214	7.23789	7.98485	7.75784	7.95729	6.95974	8.29497
DNAJC21	1.17937	5.99969e-05	0.000904301	7.0832	5.90384	6.83924	6.80447	7.44332	7.29582	6.73577	6.9265	7.2722	5.92887	6.92952	6.37454	7.14455	6.89413	8.31263	7.30516	7.71649	7.31571	6.2913	7.45748	6.42056	8.08072	6.86011	5.63943	5.37935	5.59477	5.77037	6.72439	6.31471	7.48133
DNAJC5	1.28992	7.48418e-06	0.000181013	8.93182	7.64189	8.90733	9.34107	9.21962	9.09033	8.70585	8.26971	9.58006	8.55551	8.67026	8.93444	9.03273	9.22196	9.27108	9.14192	8.15359	9.1135	8.29401	9.03796	7.75531	9.2979	9.87314	7.89143	7.45725	6.94336	6.91593	8.25746	8.38594	9.03273
DNAJC9	1.74327	1.16607e-07	7.43165e-06	9.1147	7.37143	9.47972	8.84008	9.16622	8.95769	8.57856	8.41471	9.09654	9.66471	8.85601	9.92007	10.8028	8.82623	9.28691	8.91742	9.1588	8.44973	9.20259	9.36032	8.16009	9.56656	9.10321	7.08468	7.47518	7.04316	6.76426	7.94164	7.91964	8.71435
DNLZ	1.11626	0.000304949	0.00308182	7.78759	6.67133	8.21298	7.26006	8.00855	7.19243	8.8291	7.35375	7.45725	7.13648	9.15647	7.35466	7.91188	7.98609	7.9303	8.35565	7.66083	8.13127	6.69475	7.59613	7.67476	7.63858	8.38594	6.11173	7.50085	6.12298	5.97311	7.54414	6.77516	7.39899
DNM1L	1.37194	5.89525e-06	0.000149704	9.1717	7.79976	9.03161	8.7497	9.37236	9.49668	8.28429	9.05429	8.63885	9.41188	9.18572	8.3273	9.9335	8.78559	9.52602	9.35059	9.03694	8.04696	9.49716	8.96736	9.63161	9.66838	10.3874	7.72211	7.46143	7.29051	7.42361	8.56468	8.33623	9.39326
DNM3	0.735116	0.0204093	0.0606764	5.87343	5.13831	5.8589	7.81553	5.14747	5.94945	5.21564	6.17798	5.7977	5.45772	4.75865	5.30659	6.15242	5.70145	7.02726	7.14455	5.39436	6.23869	5.11208	5.5851	5.83469	5.7023	5.42381	4.9205	4.82118	5.26745	4.94346	5.73365	5.14362	6.41301
DNMT1	1.45358	0.000348184	0.00341614	7.29378	5.8402	7.3487	6.82729	7.62862	8.93509	6.27708	6.33436	7.15874	7.30404	6.16767	6.2754	7.856	8.89953	7.94115	6.86313	6.57346	7.5256	6.74056	8.5677	5.96112	7.43713	8.11726	5.83047	5.74352	5.56948	5.18769	6.39093	6.31913	7.72358
DNMT3B	2.25423	5.61912e-06	0.000143189	8.59259	6.33836	9.5177	6.43741	9.40464	9.05902	7.42137	7.23087	8.36312	9.6421	9.26431	7.48814	10.8147	8.6194	7.41435	9.08164	9.01761	8.24134	9.31241	9.08999	7.7239	8.44883	9.35491	6.23333	5.99948	6.36668	6.25858	6.47891	6.69318	8.08927
DNPH1	1.47051	5.08957e-05	0.000793793	8.66934	7.19884	10.0357	9.19922	9.19473	8.3167	9.06255	7.65114	8.77154	10.2826	8.21779	7.43915	7.89538	8.38317	9.22132	7.98403	8.04485	8.62854	9.06589	8.33066	8.7881	8.5105	9.1692	7.16936	7.07204	6.49631	6.5742	7.79432	8.08679	8.53279
DNTTIP1	1.15794	0.000111956	0.00144552	8.54673	7.38879	8.44422	8.02741	8.91794	9.18323	7.81144	7.8732	8.61074	8.7453	7.69674	7.62671	9.19082	8.67929	8.75982	9.27556	7.52389	8.71515	8.50671	9.80615	8.15941	8.83525	9.2633	7.36296	7.57781	6.97919	6.8589	7.74881	7.80509	8.37582
DOCK7	0.69273	0.00175973	0.0111561	8.32696	7.63423	8.25558	9.00555	7.72018	8.37182	8.60581	8.04407	8.78606	7.76189	8.30965	8.20549	7.04773	8.37998	8.76726	8.07683	8.78336	8.76839	8.60313	7.75713	8.35743	8.39825	8.47406	7.70202	7.53022	7.3346	7.18635	7.9995	8.05267	8.71347
DOCK9	0.925347	0.00363144	0.0186839	8.4066	7.48126	7.58464	9.19082	7.68737	7.44296	8.20691	7.76564	8.56581	7.00004	9.16827	8.74132	9.12834	8.71807	7.95389	9.20929	7.99425	9.57264	7.9751	8.45374	8.32586	9.09761	8.75904	6.97304	7.10123	7.09197	7.45566	7.95121	8.31443	8.40367
DOHH	0.740488	0.0017215	0.0109827	6.58739	5.8469	6.89378	7.21684	6.90074	6.79053	6.50436	5.95675	6.80733	5.88708	6.33661	6.44785	6.94056	6.64453	7.195	6.65043	5.85862	6.77737	5.68065	6.59299	5.99899	6.94225	7.15102	5.72547	5.58818	5.34522	5.43511	6.29319	6.69426	6.74832
DONSON	1.28144	0.000866892	0.00665811	7.26527	5.98383	7.63622	6.04035	6.97806	7.49027	5.54741	7.0789	7.58632	6.46283	6.97742	6.91408	7.52983	7.32486	8.03593	7.99789	6.95381	7.57953	6.43026	8.09951	6.94512	9.43061	7.98443	5.66616	5.35412	5.67372	5.87886	6.94146	6.38864	6.81236
DPAGT1	1.07598	0.00115228	0.00819781	8.71444	7.63847	8.49977	8.93955	7.79839	8.97688	8.33115	8.54541	8.98871	8.527	8.25714	7.82699	9.04525	8.35011	9.04977	9.00406	8.99758	9.94975	7.25879	8.63131	9.07954	9.36154	9.19637	6.67969	7.27697	7.20732	7.07878	8.86591	8.72214	9.10272
DPH2	1.23619	2.15969e-06	6.90136e-05	7.91373	6.67754	7.93652	8.22499	8.77826	7.77416	7.50218	7.44954	7.90906	8.285	7.97858	6.89001	7.43545	8.44245	8.44076	7.24311	7.80483	8.42466	7.65794	7.91337	8.46712	8.39692	7.41193	6.24994	6.66293	6.51451	6.40117	7.09187	7.14481	7.73528
DPH3	1.04731	0.00934002	0.0358918	8.04555	6.99824	8.13066	7.8077	8.31637	9.22078	7.20732	7.77712	8.58158	8.3523	6.97452	6.43545	10.0508	8.20362	8.72797	8.88505	7.48941	8.43972	7.56592	8.59042	6.21076	7.91288	8.77447	6.51076	6.99788	6.25086	6.92201	7.82167	7.48626	7.34722
DPM1	0.870376	1.56065e-05	0.000314882	11.2717	10.4013	11.2726	10.8392	11.0167	11.3664	10.836	10.6224	11.2317	11.368	11.1206	11.1206	11.8288	11.8741	11.5781	11.2595	11.6956	10.9677	11.7362	11.1921	11.432	11.4098	10.843	10.3801	10.5594	9.80249	10.0529	11.0483	10.5648	11.3664
DPM3	1.91827	1.79659e-05	0.000350734	9.75996	7.84169	9.44294	9.23266	9.93202	9.437	8.90596	9.68325	10.798	9.04038	10.0501	9.03014	9.41062	8.71004	11.2937	10.5882	9.45191	11.2688	10.0978	9.14924	8.25853	11.0392	10.0215	6.84552	8.27343	7.003	7.36113	8.56395	9.00311	9.87714
DPP3	1.57291	6.10066e-10	1.1078e-07	9.43282	7.8599	9.59613	8.81193	9.5445	9.55998	9.27504	9.66069	9.37572	9.71233	9.62769	8.89175	9.50538	9.29165	10.237	9.57877	9.08236	9.99677	8.9645	9.72974	8.81736	9.27595	10.0868	7.79054	7.63466	8.1182	7.76114	7.96377	7.89111	8.89994
DPY19L4	1.27321	2.26078e-05	0.000419518	8.75534	7.48213	8.1678	8.73237	8.22944	8.2898	7.63946	8.23142	9.18572	8.08072	8.80477	9.03742	8.97721	8.60865	8.63096	9.22964	8.68938	8.88721	9.14192	8.31357	9.2927	9.06308	9.58839	6.78031	7.34472	6.87667	7.28494	8.35596	8.25019	9.79579
DPY30	1.20582	2.39112e-08	2.21493e-06	10.1954	8.98954	10.1136	9.80674	9.72307	10.3756	10.7138	10.8477	9.72678	10.2947	10.4329	9.49607	10.4592	10.6981	10.2188	10.5386	10.2231	10.1585	10.322	9.95782	9.88738	9.71481	10.5252	9.16034	9.01994	9.18232	8.85841	8.91324	8.80297	10.0634
DR1	1.29268	1.05635e-06	3.93636e-05	8.17229	6.87961	8.41403	8.60893	7.62442	8.07267	7.74431	7.78959	8.59376	7.94989	8.0322	7.82553	8.4029	9.16508	8.48298	7.7707	8.20468	8.43261	7.56091	8.21496	8.13127	8.38033	8.06377	6.72796	6.69198	6.08895	6.31242	7.78116	7.6752	8.32485
DRAP1	0.742871	0.022044	0.0640547	6.92887	6.186	7.08353	7.20904	7.19447	7.20248	6.46044	6.04043	7.02743	6.19693	6.53766	6.09068	7.39222	7.19744	8.25558	7.86889	5.74748	7.26271	5.71396	7.54062	6.0612	7.91431	7.38393	6.10361	5.65559	5.47624	6.40381	6.75887	6.71786	7.05369
DROSHA	0.743587	0.00104065	0.00762657	10.7994	10.0558	10.836	10.12	10.9009	10.8952	11.2389	11.1206	10.6177	10.7555	11.5212	10.1574	11.0392	10.2993	11.2073	11.4119	11.1816	10.5583	10.3514	10.6609	10.6711	10.9061	10.2399	9.39437	9.94409	9.75679	9.63986	10.7618	10.8378	10.8952
DSCC1	1.18666	5.6199e-06	0.000143189	7.45807	6.27141	7.28375	6.89244	7.12381	7.23689	6.99731	7.02948	7.78183	7.40068	7.13967	7.22202	7.96782	7.73224	8.17063	7.19702	6.86074	7.38747	7.50481	9.08805	7.18033	7.60521	7.64268	6.27201	5.78777	6.18987	6.16581	6.68059	6.5324	7.63268
DSN1	1.07442	2.07666e-05	0.000392029	6.51002	5.4356	6.39728	6.04266	6.59059	6.82093	5.42499	6.13938	6.57918	6.31867	5.84399	6.0062	7.15474	6.6684	6.5463	6.84246	5.96425	7.03515	6.50966	7.02006	5.96112	7.45326	6.85497	5.17436	5.42763	5.55822	5.16692	5.72387	5.5626	7.0462
DSP	1.44316	2.70785e-05	0.000482208	12.1773	10.7342	12.2906	11.2914	12.2471	12.5768	12.3549	11.766	12.3589	11.8028	12.9563	11.7023	12.5987	11.7714	11.5632	12.2225	13.3455	12.1795	13.0055	10.3988	12.8171	12.4461	11.5873	9.87087	10.4792	10.566	10.6992	11.6211	11.1686	12.6183
DTD1	1.22595	0.00142396	0.0095909	9.52898	8.30303	10.8161	9.86916	9.88266	10.015	9.64926	8.20499	8.8396	10.2213	9.76427	8.10852	9.76627	9.88738	9.54346	9.75679	9.15741	9.35752	10.3371	10.3773	7.48674	8.8392	10.2721	8.10932	8.49004	7.65936	7.60085	8.71004	9.2486	9.4856
DTL	2.8223	9.09078e-10	1.55222e-07	7.34767	4.52537	7.9924	6.86074	6.96969	7.42361	6.2928	6.36296	7.61306	7.461	6.06183	6.1186	8.03897	7.69792	7.75497	7.67279	7.5316	6.44406	8.02466	9.20039	7.05634	7.9998	7.44577	4.50289	4.0517	4.92654	4.01365	4.93537	4.72204	7.62472
DTX3L	0.664322	0.0383597	0.0951507	11.2995	10.6352	11.5993	11.5586	11.5993	11.5781	12.0667	11.3235	11.5075	10.0116	12.2647	12.1827	10.229	11.8997	11.5714	10.8765	10.1399	11.6394	9.77948	11.5809	10.6952	11.8719	11.2336	10.5241	10.5738	10.1969	9.9328	11.4764	11.1073	11.3808
DTYMK	0.864886	3.49319e-05	0.000592587	7.6064	6.74151	7.82553	7.46282	7.69516	7.7837	7.05614	7.67073	7.73356	7.89804	6.82585	6.71665	7.00531	7.77312	8.27438	7.67708	7.58595	7.72647	7.38325	8.10646	7.63328	7.83709	8.23908	6.36004	6.82952	6.95192	6.66451	6.71991	6.92318	7.43113
DUS1L	1.5237	9.2304e-07	3.57952e-05	8.95102	7.42733	9.14776	8.35011	9.83619	8.72997	9.14237	9.46232	9.32809	8.1153	8.66473	9.19999	9.0563	9.38346	9.11138	8.70297	9.31195	9.27504	8.06455	9.91415	7.7789	8.9523	9.15338	6.96178	7.11627	7.43611	7.15047	7.70303	8.1963	8.24134
DUS4L	0.767605	0.00121619	0.00849922	6.39355	5.62595	6.04407	6.26744	6.57289	6.69077	6.15365	6.67485	6.37906	5.49408	5.48765	6.06198	5.93019	7.04719	6.48928	6.99731	6.46652	6.60831	6.08587	7.39709	5.97134	6.67197	6.9565	5.67412	5.82512	5.1471	5.09222	5.97064	6.04648	6.21011
DUSP10	0.792679	0.00829991	0.0332055	6.11946	5.32678	5.99315	5.19238	6.01191	5.84553	6.19985	6.49508	6.59647	5.80119	5.53592	7.70684	6.54331	5.75154	5.67837	5.35396	6.5781	6.51062	5.72637	7.17306	6.05465	6.03812	6.92746	6.18243	5.07918	5.34885	5.35991	5.08234	4.90796	4.91418
DUSP11	0.837071	6.26382e-05	0.000925217	9.84242	9.00535	9.51036	10.1902	9.77273	9.94491	10.6549	9.79343	9.72138	9.31241	9.77331	9.62913	10.1516	10.191	9.4556	9.78032	9.93717	10.0938	9.98273	9.35292	9.99258	8.97887	10.0805	8.73988	9.13784	8.57661	8.59333	9.34831	9.63613	10.2334
DUSP12	0.665918	0.0185298	0.056877	9.03605	8.37013	8.45814	9.02546	8.49945	9.74057	8.63694	7.73478	9.52717	9.19333	8.78538	8.57932	9.38115	9.15271	9.80478	9.94236	8.13739	8.26372	9.18603	9.58701	9.25752	9.19432	9.48091	8.22382	8.47406	7.72066	7.60381	9.19333	9.0051	9.22466
DUSP14	1.18099	0.00539084	0.0246685	8.76038	7.57939	9.25256	7.52073	9.26175	9.49295	8.04938	8.3729	9.37043	8.51225	7.95798	7.99725	9.78032	9.32422	9.05724	9.11138	8.75142	7.92344	8.28786	10.6504	7.11654	9.05325	9.18994	6.15959	7.47202	7.13336	6.82161	9.0152	8.87453	8.69421
DUSP16	0.733562	0.00382936	0.0193568	7.55773	6.82417	6.94455	8.13127	8.01271	8.48026	7.97679	7.73336	6.95999	7.4907	7.40925	7.30971	8.39617	7.97174	7.30484	7.64697	6.90859	7.38232	7.12059	6.69668	7.75564	7.69674	6.80923	6.27418	6.67768	6.57712	6.57774	7.21285	7.62546	8.132
DUSP2	1.1191	0.0155329	0.0507923	7.84115	6.72205	8.76298	9.29748	8.22037	9.52768	8.35049	7.43036	8.61428	7.46439	6.75211	6.65034	7.69092	9.28753	8.32264	6.85342	6.02325	8.39931	6.32834	8.22101	6.99599	7.69516	7.90472	6.08922	5.62944	7.90811	8.12893	6.44062	6.13598	7.71256
DUSP28	0.802077	0.00450648	0.0217161	7.78647	6.98439	7.8924	8.60117	7.94878	7.86045	7.38079	7.96935	8.55698	7.51238	6.82395	6.8521	6.9436	8.43261	8.77069	8.97766	7.72161	7.52073	7.05892	7.38527	7.40752	7.72145	7.78959	6.65718	7.09542	6.51128	6.79331	7.29841	7.55078	8.17436
DUSP5	0.705944	0.0260632	0.0721594	6.81678	6.11084	6.28959	6.53642	6.58891	6.57875	6.64851	6.19907	7.53883	5.94924	6.5228	7.8483	7.96067	6.38839	6.32593	8.47078	7.06062	6.75866	6.35581	8.00621	6.27769	6.91952	6.42288	5.91393	5.73558	6.00004	7.25717	6.0681	5.6902	6.32157
DUT	0.821114	0.00161926	0.0104843	10.4657	9.64461	10.9191	10.9839	10.2545	10.4892	10.8295	10.5873	10.9503	11.1686	9.87548	10.4329	10.8295	10.6486	10.3969	9.92152	10.1354	9.65394	9.59972	10.2558	10.2299	10.6326	10.4908	9.00068	9.5016	9.0568	9.07551	10.5302	10.7029	10.9605
DYDC2	0.860561	0.00174789	0.0110934	5.78986	4.9293	5.75905	5.17479	5.65475	5.77891	6.1656	6.0253	6.13193	5.47148	4.98325	5.29558	5.92104	7.17464	6.22054	7.01295	5.78471	5.13748	5.41002	4.84639	5.33512	5.866	6.39309	4.52212	5.10021	4.83982	4.97196	4.62944	5.51223	5.83425
DYNC1H1	0.706051	0.00269427	0.0152172	7.92446	7.21841	7.85449	7.6868	7.38194	8.04001	7.8976	7.99503	7.55237	7.13039	8.20714	8.3523	8.19694	8.5006	8.45119	8.132	7.31745	8.28786	7.59871	7.34065	7.93727	8.3553	7.72581	6.95757	6.90267	6.67779	6.64295	7.87092	8.25853	8.39617
DYNC1I2	0.818299	0.00205476	0.0124802	9.81447	8.99617	9.19268	9.83866	9.76427	10.3346	9.29046	8.86285	10.3969	8.87056	10.1648	9.51318	10.0908	9.9335	9.7593	10.4978	10.5345	10.1657	9.96434	9.63474	9.64926	9.54132	9.82958	8.72652	8.99811	8.04377	8.48116	9.88416	9.84332	10.0884
DYNC1LI1	0.818668	0.00232476	0.0136896	7.78647	6.9678	8.04802	7.64764	7.55835	8.19598	7.42845	7.90498	7.97419	6.7566	7.4414	7.17931	8.10684	8.22632	8.64151	8.73458	7.49188	8.17436	8.21674	7.17389	6.72175	7.7738	8.39437	7.10333	6.76724	6.23913	6.6323	7.65286	7.41193	7.51135
DYNLL1	0.587103	0.000490313	0.00435664	12.07	11.4829	12.0269	11.8288	11.7714	12.5432	12.0219	11.8599	11.7291	12.3549	12.0603	11.7534	12.34	12.4957	12.3351	12.4033	11.7559	12.0947	11.9034	11.8599	12.1397	12.152	12.0364	11.0438	11.6562	11.0167	11.0836	12.0057	12.0912	12.0738
DYRK2	1.73593	1.3952e-09	2.24804e-07	8.41868	6.68275	8.98124	7.71448	8.40573	9.15647	8.28236	8.08375	8.9523	8.66818	7.79804	7.89493	8.68532	8.42566	8.81243	8.07628	8.36849	8.24186	9.03742	7.97457	8.29337	8.40008	8.72826	6.61813	6.44031	6.39405	6.05359	7.41787	7.17253	8.22973
DYX1C1	0.636854	0.0110873	0.0405926	6.07511	5.43826	5.76777	6.0198	5.72765	6.27447	5.67866	5.3624	6.05465	6.0196	5.70299	5.36683	7.00788	6.35138	6.12542	6.02032	7.40009	5.38222	6.03189	5.21007	6.54739	6.60867	6.33198	5.45409	5.29733	5.15388	5.13838	6.0743	5.51156	6.66032
E2F3	0.654817	0.00348918	0.0182006	9.62444	8.96963	10.0874	8.78336	9.64535	9.73256	10.4602	8.85783	9.10585	9.89307	9.42355	9.0736	9.66069	10.0183	9.37447	8.96574	10.2712	9.95782	10.3901	9.45887	9.86541	9.69494	9.46671	9.03066	8.95643	9.38586	9.07176	8.40806	8.965	9.55062
E2F5	1.32807	0.00375426	0.0191366	7.57876	6.25069	7.6576	8.23515	6.73007	8.24928	7.15474	5.62982	7.57797	7.0974	7.26082	5.60902	8.28945	7.56808	8.50163	8.50705	9.2805	7.78784	8.65744	5.38888	8.01425	7.48757	8.44459	5.70022	6.38022	5.61507	5.93295	7.00549	6.87016	7.60356
E2F7	1.46864	1.44801e-06	5.08916e-05	7.03447	5.56582	7.44309	6.24893	6.64707	7.2187	7.10269	6.76938	6.53352	7.9918	5.952	6.4652	7.50085	7.94092	7.24833	5.96715	7.20838	6.44248	7.7298	7.34925	7.61655	7.08431	7.05778	5.91595	5.51807	5.73225	5.29346	5.32263	5.61258	7.24007
E2F8	2.9788	5.48621e-11	1.45959e-08	8.47748	5.49868	9.77073	7.89804	8.51481	8.18457	7.64385	8.81433	7.68478	8.49795	7.91669	7.97457	9.07714	8.94386	8.70879	7.80349	7.79642	9.29896	8.58199	8.90503	8.01557	8.95936	9.64659	5.86628	5.11392	5.83066	4.69498	6.60066	4.88557	7.86703
E4F1	0.668237	0.0055324	0.025126	7.14778	6.47954	7.13824	7.04664	7.03268	7.36924	6.49207	7.1385	7.33307	6.77331	7.01143	6.20216	7.52805	7.44928	7.35983	7.6915	6.49477	7.54744	6.38847	7.08114	6.66474	7.84574	8.12244	5.71351	6.3326	6.31471	6.60471	6.84159	7.07013	7.54038
EBAG9	1.09488	8.99269e-05	0.00122254	10.3213	9.22638	9.66011	9.54482	10.1113	9.33156	10.2657	10.9287	10.9127	9.73104	10.7119	10.4402	10.4908	9.96742	10.7107	10.2883	10.9472	10.0841	9.36235	10.5693	10.8442	10.5952	10.8914	8.79945	9.24322	8.63985	8.8742	9.80478	9.99677	10.6789
EBNA1BP2	1.40615	3.27751e-07	1.6445e-05	11.8267	10.4206	11.6105	12.304	12.0184	11.6211	11.7236	11.9931	11.7907	12.3087	12.0982	11.2614	11.2663	12.6183	12.2131	11.4764	12.2009	11.5482	11.2866	11.4933	12.4093	11.8888	11.279	9.65027	10.3182	10.1443	9.9473	11.2914	11.172	11.778
EBP	1.43248	0.000112215	0.0014471	8.45956	7.02708	9.6074	8.64602	8.08433	7.75477	8.13972	8.94093	8.67804	7.91992	9.63304	8.48852	9.28887	8.8112	8.99062	8.6068	7.2865	7.78732	7.84607	7.48729	7.33718	9.10076	9.47348	6.47568	6.95132	6.59831	6.36906	8.02755	7.74057	8.20148
ECD	0.674952	0.00459098	0.0220075	8.15893	7.48398	8.47037	7.692	8.29631	8.13938	7.49687	8.09867	8.52657	8.50781	8.42266	8.55995	9.38176	7.34235	8.49977	8.65141	7.7286	8.1829	7.54038	8.3101	7.91608	8.03355	7.94723	7.42076	7.92222	6.67101	7.07339	8.065	7.75149	7.75172
ECHDC3	1.64723	0.00045736	0.00414432	7.9938	6.34658	8.23076	9.53342	7.81628	8.41298	7.66386	6.25221	8.34669	5.65574	7.96377	7.71517	6.48513	8.91924	8.59457	8.04668	7.66491	8.77628	6.66206	9.32476	7.99316	8.7252	8.72652	5.69421	5.79799	6.0827	5.941	7.33198	7.23159	8.35433
ECHS1	0.858866	0.00375622	0.0191366	11.0965	10.2377	11.3664	12.4915	10.5076	10.7545	11.6747	10.237	11.4067	11.0681	11.4573	11.0048	9.96537	11.6476	11.6537	11.6419	11.0803	11.1557	10.8204	10.0978	10.5534	11.8599	11.0857	9.88811	10.3535	9.91517	9.61934	10.5785	11.0714	10.5934
ECI1	1.58074	7.08172e-05	0.00101251	9.95225	8.37151	10.5693	10.7029	9.72678	10.1641	9.97254	9.71038	9.91354	9.51432	10.0244	8.86285	9.99325	10.7861	9.80249	10.1143	8.3694	9.85192	8.88801	10.1408	9.10216	11.3235	11.3524	7.38844	8.24808	7.83774	7.86552	9.32138	9.56791	10.0643
ECT2	2.97973	7.80816e-11	1.9632e-08	9.07087	6.09113	9.15968	8.38546	8.91205	9.08999	7.23248	8.52526	8.45932	8.81303	9.19549	8.84287	9.98	10.3114	9.23628	8.22499	9.31378	8.98952	9.87548	9.29046	8.3549	9.87395	10.0357	6.07944	5.55983	6.16083	5.89509	6.85473	5.99687	9.45696
EDEM3	0.746261	0.00842327	0.0335231	6.87757	6.13131	6.86673	6.63075	6.3542	7.11976	5.85722	6.80403	7.24811	6.02593	6.46404	6.2412	7.14313	6.98524	7.69119	7.12221	6.67675	7.37496	6.74152	6.09033	7.3669	7.45849	7.42673	5.94945	5.27094	5.5806	5.91943	7.36329	6.70413	7.61707
EEA1	0.849133	0.0088649	0.0347013	8.1884	7.33927	7.94723	7.96347	7.57391	8.61675	7.71023	8.46166	8.71226	7.54614	8.24217	7.68273	9.54658	8.71476	8.56426	8.92075	6.91142	7.89572	7.40554	7.3626	8.85301	7.95049	8.47984	7.11675	6.62336	6.51736	7.5322	8.54477	7.70117	9.08329
EED	1.08861	0.00116706	0.00826187	9.54934	8.46073	9.44685	9.76917	8.67195	10.1657	9.61412	9.61746	9.97781	8.39273	10.3477	8.90877	9.89976	9.73676	10.2628	9.18603	9.07714	9.83952	8.97364	9.41231	8.97688	9.59113	10.0948	7.9816	8.01425	7.43888	7.69434	9.81325	9.82207	10.1224
EEF1D	0.63509	0.00176956	0.0111894	12.2288	11.5937	11.8321	12.5366	11.8599	11.9258	12.4957	12.088	12.7664	12.2471	12.5707	12.23	11.8923	12.2999	12.3453	12.0839	12.8122	11.9518	12.1286	11.962	11.852	12.3695	12.517	11.4621	11.8577	10.7845	10.8765	12.121	12.4607	12.2678
EEF1E1	1.63433	3.12315e-05	0.000539393	8.23669	6.60236	8.86474	7.39741	7.99425	9.32283	7.57559	6.40117	8.28236	7.81345	8.78888	6.72422	8.16999	8.53204	9.19082	8.54307	8.60033	8.61549	8.8212	8.89089	7.61742	8.02432	8.51343	5.94061	6.4196	5.92828	6.25399	7.66598	7.40568	8.52325
EEF2K	0.68021	0.0161302	0.052082	8.9986	8.31839	9.41522	10.243	8.76183	8.64377	9.5061	8.89663	8.63694	8.04485	8.64656	8.9359	8.98349	9.37572	9.40178	8.7704	8.21452	10.2759	8.0733	8.3766	9.0696	9.14113	8.97597	8.34434	8.06169	7.94514	7.59871	8.89213	9.06834	9.58006
EFCAB2	1.05329	0.000749156	0.00595369	6.64255	5.58926	6.24726	5.6965	6.42288	7.8583	6.41489	6.2028	6.48888	5.75809	6.31666	5.72577	7.5468	7.41749	7.17253	7.10621	6.54641	6.20657	6.41877	7.31662	5.97707	7.71604	6.3522	5.64884	4.95263	5.41113	5.5168	5.73493	6.27122	7.22737
EFCAB3	0.85392	4.82223e-05	0.000760914	4.50231	3.64839	4.41098	4.65365	4.38958	4.99368	4.20043	4.49936	3.8248	4.31434	4.66621	4.46946	4.28131	4.49537	5.14002	4.30416	4.76748	3.99968	4.66039	3.85212	4.49613	4.96828	4.43818	3.84343	4.04586	3.82197	3.66638	2.78248	3.73023	5.22529
EFHD2	0.831789	0.0482153	0.111319	7.47238	6.64059	7.45419	9.34736	7.57322	8.01462	7.05549	6.99107	7.51322	6.35695	7.01986	6.61226	8.19245	8.38702	8.39666	8.48187	6.61085	8.62609	5.41041	8.4235	5.92394	7.1259	7.40009	7.09943	5.97745	6.19675	5.9541	7.20707	7.40873	7.47531
EFNA1	1.30905	0.00657386	0.0282619	10.0583	8.74925	8.66545	10.1697	10.3685	8.72142	9.32954	10.6445	11.0167	9.70633	11.4831	9.84752	9.28997	10.1884	10.9274	11.1054	9.1916	11.6988	8.57237	10.0716	8.39121	11.157	10.326	7.02304	8.15774	8.47114	8.86035	9.84332	10.1399	10.4103
EFNA4	1.77295	0.000540403	0.00468527	8.02287	6.24992	8.03858	8.18874	8.56669	8.88348	5.45254	6.94419	7.54754	9.26844	8.27532	6.57972	8.54396	7.46072	9.07258	8.76804	7.54038	9.9457	8.40729	7.4172	6.14698	8.53036	8.4815	5.24639	5.86591	5.97763	5.71458	7.03184	7.66319	8.44325
EFNB2	2.03129	0.000557815	0.00480166	9.78763	7.75634	11.3274	8.07172	7.52592	8.90503	6.78834	9.79423	10.9109	9.90864	10.7439	10.5265	10.0412	10.8458	10.8635	8.78845	9.63073	10.3318	10.9727	9.21289	8.55662	11.1897	9.44817	6.84218	7.47264	6.9265	7.98507	8.99357	8.31809	10.944
EFR3A	1.02768	0.00425483	0.0208728	11.1612	10.1335	10.6789	11.4992	10.4162	10.5175	11.1243	11.8321	11.766	9.03014	11.6045	12.1968	10.4229	12.5768	11.0483	11.0552	11.4349	11.5163	9.97864	12.0269	10.6087	11.2595	11.5612	10.0397	9.96537	9.64702	9.76477	10.6224	10.7618	11.3911
EFTUD1	0.83219	0.000593113	0.00503354	9.41658	8.58439	9.19233	9.51432	9.59669	9.64983	9.86985	9.76061	9.55642	9.24221	9.60672	9.8212	10.1608	9.49411	8.61268	8.88458	8.54396	9.28691	8.85841	9.92514	9.10889	9.8547	9.43175	8.42494	7.7583	8.20257	8.46669	9.36154	9.29231	9.19268
EFTUD2	0.897612	0.00300348	0.0163696	8.21708	7.31947	8.8392	8.07039	8.69001	9.0616	7.5815	7.01752	8.12169	8.4286	8.22818	6.91301	8.99811	8.132	8.61464	8.18493	8.61675	7.67476	8.52811	8.22238	7.75804	7.96782	9.25914	7.12894	7.20204	6.49154	6.9136	7.83908	8.3416	7.86733
EHF	2.79113	1.871e-06	6.22191e-05	8.68408	5.89295	9.37981	9.81154	6.77069	7.281	9.12344	8.90116	10.1033	6.06503	9.77423	9.72011	8.13454	7.65591	8.67626	7.62406	7.3455	10.3977	8.70203	8.1015	9.34394	9.88175	9.2979	5.66461	5.62904	6.63597	5.87426	5.55268	6.00115	8.95832
EHHADH	1.76362	0.000108144	0.00140924	8.43443	6.67081	8.55698	8.87453	8.46092	8.24037	9.19376	7.95438	6.48423	7.27249	10.0263	9.97935	7.78473	9.59414	8.43223	7.14358	9.0027	7.60778	8.87096	7.06823	9.55432	8.7437	7.9379	7.24032	6.37586	5.88513	6.58531	7.09648	6.84177	8.77399
EI24	0.636345	0.0120754	0.042917	10.2999	9.66359	10.3371	10.6549	10.3073	9.65394	10.3367	10.406	10.5989	10.5762	10.2473	10.2993	9.65394	10.3299	10.7861	10.4286	8.72142	10.7439	9.76146	9.8685	10.6023	11.2524	10.5634	9.23224	9.78708	9.16726	9.17618	10.1818	10.4369	10.469
EID2	1.04193	0.0148096	0.0491576	7.71817	6.67625	9.01313	7.7003	8.35944	9.13449	6.33355	5.813	7.73452	6.43519	7.98415	6.33436	8.89089	7.20338	8.13127	8.20954	7.06702	8.10167	7.36737	7.94614	6.84796	7.91213	8.51867	6.13327	6.22141	6.02458	6.38811	7.59541	7.69469	8.7616
EIF2AK1	1.26317	1.87759e-06	6.22523e-05	9.83395	8.57078	9.39326	10.2152	10.2093	10.0236	10.0429	9.63545	8.99005	9.64702	9.5157	9.18426	10.5034	10.4411	10.1509	9.99768	9.77195	10.2204	9.29435	9.16144	9.67195	10.2611	10.0079	8.28877	8.37998	8.0345	8.12208	9.19473	9.40464	10.0079
EIF2AK2	1.07623	0.00132824	0.00911396	8.65179	7.57556	8.48187	9.13947	9.1067	9.32368	8.89258	7.43488	9.52768	7.72145	8.1518	8.3549	8.26437	9.28372	8.28167	8.37182	7.65566	8.741	8.61801	9.16468	8.26806	9.06126	9.46525	7.11172	7.3634	6.60286	6.90925	8.9385	8.52766	9.02889
EIF2AK3	0.666365	0.0114677	0.0414566	8.01187	7.3455	7.5181	8.2667	8.07931	8.49082	7.23714	7.60316	7.89829	7.33976	8.07914	6.86093	8.67476	8.29202	8.82197	8.22471	7.37943	9.06779	8.32297	7.66366	7.42119	8.09897	8.14877	6.90225	6.96535	7.28345	7.39528	7.99918	7.52751	8.77154
EIF2S2	1.17694	6.05485e-06	0.000153416	9.96836	8.79143	9.74057	9.56285	9.63379	10.3662	9.15338	9.57321	10.244	10.0567	10.3195	9.7339	10.4678	10.3346	10.3911	10.2025	9.79266	9.70633	9.39097	10.3801	9.5207	9.97424	11.2776	8.61756	8.66512	8.33508	8.66902	9.47283	8.98895	9.48132
EIF3A	0.638032	0.00108543	0.00786401	10.1524	9.51433	10.3244	10.5873	10.2453	9.72371	10.4967	9.31994	9.97424	10.6048	10.2826	9.53693	10.2985	10.5189	10.4748	9.86463	10.2035	9.81982	10.4805	9.73617	10.1792	10.1487	10.3092	9.5395	9.27595	8.8742	9.32368	10.2222	9.8505	10.2222
EIF3B	0.622922	0.0399532	0.0978499	8.93948	8.31656	8.57501	9.86463	9.39388	9.63834	9.36878	7.83106	8.4871	8.60433	8.69848	7.44321	9.80081	9.88492	9.58783	9.22078	7.99544	9.75266	8.25922	8.82697	8.27078	8.84865	9.29748	8.1775	8.11068	8.03621	8.17436	8.61675	8.78384	9.01815
EIF3C	0.692608	0.012743	0.0445296	11.419	10.7264	11.5482	12.1674	10.8013	11.355	11.468	10.9586	11.18	11.4764	11.4933	10.9311	11.1369	10.7602	11.8628	12.4711	11.1322	12.101	10.6952	11.4783	10.8661	11.1939	11.6664	10.0667	10.8914	9.78956	10.4506	11.5497	11.6105	12.4749
EIF3H	0.747075	0.00117159	0.00828501	11.5803	10.8332	11.3626	11.8923	11.0187	11.3808	11.3986	11.7291	11.9381	11.6664	12.2424	11.628	11.1403	11.2688	12.2647	11.4621	11.9577	11.2368	11.6045	11.5968	10.8378	11.6105	11.7213	10.3073	11.052	10.099	10.2386	11.5052	11.7973	11.8088
EIF3J	1.09324	3.44172e-05	0.000585041	8.85029	7.75705	8.6495	9.35167	8.72069	9.13246	9.05325	8.06828	9.36962	8.58941	8.82568	8.69263	9.57947	9.59826	9.06211	8.21333	8.34407	8.55737	7.96554	9.18392	9.19518	8.65817	9.22729	7.53251	7.73721	7.01811	7.39997	8.72997	8.12454	8.66858
EIF3K	0.832926	0.0292371	0.0783309	10.4997	9.66678	11.4621	11.2543	10.9311	11.8066	9.16661	9.04726	10.7348	10.2628	11.3609	10.083	10.1297	10.0194	10.9576	10.6138	10.029	10.8572	9.83535	10.5164	8.533	11.368	11.3068	9.08999	9.8274	9.0478	9.12185	10.1801	10.7336	10.718
EIF4A3	0.995954	3.16783e-05	0.000545783	11.3415	10.3456	11.8088	10.5826	11.2508	11.6914	11.3849	10.6597	11.9292	10.9861	11.766	11.0995	11.2206	11.432	11.6232	11.2368	12.0325	11.2016	11.4044	11.5632	10.5019	11.5586	12.0484	10.5085	10.2399	10.0002	10.6076	10.0429	10.6742	10.5313
EIF4E2	1.15572	7.34043e-07	3.07532e-05	8.90531	7.74959	9.24359	8.87342	9.09092	9.20627	8.52526	8.40117	8.99062	8.85009	8.88782	8.08193	9.35986	8.64557	9.27504	9.05789	9.37832	9.31435	8.97093	8.58941	8.99504	8.68582	9.17546	7.94723	7.80802	7.11627	7.10621	8.35011	8.16973	8.31809
EIF4EBP1	1.01309	0.0205044	0.0607853	7.21863	6.20553	6.77354	6.91105	8.76365	9.82398	6.06537	6.06177	6.63747	6.41739	6.2424	6.65534	7.93933	8.62683	8.17089	6.62046	6.82705	7.94268	6.59786	8.37938	5.99724	6.98486	7.39661	5.89037	5.919	6.65928	6.05685	6.55351	6.15418	6.97465
EIF4G1	1.62863	5.75082e-08	4.47547e-06	8.86604	7.23741	8.5584	9.06488	9.12972	9.14333	8.55995	8.53114	8.79923	7.96106	9.13083	8.80297	9.6531	9.63774	9.2113	8.84287	8.42239	9.15647	8.79184	8.4871	8.37782	9.63231	8.23564	6.96125	6.78143	6.90982	6.68446	7.9266	8.16089	8.92269
EIF4H	0.823364	6.31487e-05	0.000930355	11.6195	10.7962	11.6664	11.7683	11.5163	11.8	11.6826	12.2647	11.4802	11.5332	11.5968	11.2057	11.3643	12.088	11.7973	11.948	11.4293	11.8399	11.2646	11.1865	11.6187	11.7876	11.2283	10.3488	11.0001	10.1045	10.2954	11.34	11.6884	11.5632
EIF6	1.99321	3.26649e-10	6.61393e-08	11.3599	9.36671	11.0714	11.745	11.4645	11.5387	11.357	10.4873	11.3029	11.88	12.0403	10.8765	11.7714	11.1982	11.3124	11.285	10.6128	11.3609	11.3042	11.6688	10.6927	11.6587	12.2875	9.21246	9.2927	8.99084	8.75614	9.78956	10.1585	11.0018
ELAVL1	0.903514	0.000221046	0.00241409	8.32434	7.42083	8.06307	8.35394	8.37696	8.57022	8.43294	7.72824	7.96782	9.0786	7.76994	8.08544	8.76804	8.15538	8.82623	7.88626	8.56705	7.13079	8.78226	8.41367	8.45374	8.3729	8.57584	7.06934	7.48941	6.778	7.07628	7.85015	8.2618	8.77628
ELK3	0.906755	0.00117493	0.00829962	9.05487	8.14812	8.70675	8.59492	8.46924	9.51852	9.55004	9.26041	9.64331	8.68906	9.40646	9.09284	8.36169	9.7075	8.68705	9.11207	8.12366	9.26431	9.15741	10.3423	9.24221	8.48225	8.88592	8.02525	8.07833	7.40132	7.5056	9.1579	8.72031	8.90925
ELOF1	0.712814	0.0157876	0.0513755	10.2301	9.51728	10.7013	11.0098	10.7723	10.8013	9.39578	9.02936	9.63304	10.752	9.45415	9.94975	10.2188	11.1998	10.8263	9.32702	10.5796	10.2035	10.4435	10.2738	9.84332	9.80352	10.478	9.88738	9.6343	8.68582	8.63611	9.93717	10.3229	10.3662
ELOVL1	1.36045	1.70425e-05	0.000335859	8.23037	6.86992	7.99286	9.14284	8.7909	8.27281	7.62575	8.77717	8.50565	6.75096	8.29813	7.98717	7.71106	9.61595	8.71303	7.90591	8.43732	8.71906	7.29385	7.94357	8.37938	8.17767	7.90355	6.99485	6.66521	6.52249	6.34742	7.43217	7.25739	8.12348
ELOVL6	1.95544	2.5983e-05	0.000467269	7.87055	5.91511	8.01636	7.47354	8.59228	8.88854	8.68906	7.56711	8.17856	7.6868	6.79065	6.592	8.07172	8.27532	7.44283	9.20706	5.79103	7.81582	7.4332	7.49595	6.39242	9.04168	9.40125	5.32941	5.58992	5.67886	5.51872	6.95285	6.42092	8.309
ELTD1	1.07719	0.00166212	0.0106854	6.72777	5.65058	6.70069	6.5308	6.05327	8.31173	5.94329	5.55908	7.28292	6.08476	6.12325	7.19744	7.08323	7.99812	7.0936	6.34752	6.05573	6.55958	6.11263	7.94646	6.03189	6.82742	7.33307	6.47776	5.25553	5.19253	5.45355	5.73972	5.78438	6.83435
EMC2	0.85064	0.0031542	0.0169996	10.4379	9.58724	10.1306	10.2222	10.0063	9.89123	10.9298	10.804	10.6671	9.18232	11.2227	11.2714	9.76146	9.96283	11.4854	10.2598	11.0944	10.2093	9.79637	10.3335	10.5164	10.6802	11.0356	9.57819	9.21805	8.77756	9.39927	10.4855	10.0649	10.1707
EMC6	1.07029	0.000254091	0.00268403	9.20984	8.13954	9.83702	8.436	9.16573	9.40884	8.04651	9.53076	9.60915	9.59141	9.52768	9.55831	10.5858	9.01162	9.12883	9.12578	9.17289	8.84726	9.35602	9.61354	8.63096	9.01472	9.02061	7.65033	7.79788	7.54484	7.91136	8.88505	9.0478	8.39692
EMC7	0.865521	0.00218843	0.0130786	9.90764	9.04212	9.66776	10.5515	9.99258	10.3784	10.0312	9.97108	10.3356	9.50538	9.69719	10.2683	10.745	10.1574	9.82462	10.0716	8.66332	9.79948	8.68483	9.92007	10.004	9.86197	9.80478	9.09092	8.79387	7.98191	8.41095	9.8543	10.1207	10.0319
EMC8	0.804375	0.0110183	0.0404069	8.60991	7.80554	7.97645	8.61491	9.2561	8.66512	7.95756	7.79909	7.82957	8.10118	8.53204	7.73064	8.38392	9.07196	9.72912	9.0663	8.25284	8.93994	8.08433	9.51318	8.93509	9.82809	8.19131	6.92607	7.98191	7.20572	7.3369	8.65094	8.73169	8.95936
EMG1	1.53922	1.1573e-05	0.000250274	9.86886	8.32963	8.61905	9.35752	10.1697	10.9127	9.5775	9.29896	9.21088	10.8417	9.89689	8.84757	11.1557	10.297	10.0874	10.1337	9.91657	9.38975	9.86768	10.1354	9.85927	10.5839	9.76003	7.84698	8.07206	8.08571	7.80188	8.77154	9.39965	9.1959
ENAH	1.07321	0.000127934	0.00160241	9.04076	7.96755	8.56548	8.93363	8.90877	9.97254	8.63281	9.35292	8.41027	9.48903	8.93908	8.24015	9.52286	9.20226	8.90367	9.43819	9.1355	8.79184	9.69836	7.94268	9.18133	10.1657	8.31932	7.61889	8.02063	7.9592	7.83404	7.58827	8.78426	9.15036
ENDOG	1.63412	9.91355e-06	0.00022347	7.32755	5.69342	7.53189	7.03425	8.18674	7.01724	7.04664	7.63018	7.63514	6.5322	7.86045	6.63796	7.17202	6.58325	8.46373	8.35199	7.23714	7.73544	5.84745	7.56249	6.21814	7.88398	8.18874	5.40405	5.46576	5.40211	5.05009	6.62555	6.21297	6.84895
ENO1	1.51919	2.02455e-09	3.06185e-07	11.0258	9.50664	10.982	11.3137	10.4411	10.9287	11.421	11.4234	10.7439	11.1982	11.0018	11.5936	10.9503	11.1441	10.9707	10.8529	11.1043	10.7322	11.1027	10.5252	11.4098	10.9175	10.9034	9.6531	9.46035	8.81243	8.73505	10.241	10.138	10.9076
ENO2	1.08208	0.00474645	0.0225675	7.61169	6.52962	7.43065	7.52265	9.15388	7.92401	7.36949	8.70203	7.32043	8.09066	6.74987	7.85308	8.47321	6.76322	7.06727	8.10184	5.66789	5.96605	7.97815	6.77	7.93259	8.4377	8.06867	6.21549	6.37248	6.25234	6.12325	7.25154	6.9626	8.11391
ENPP4	0.852404	0.00513473	0.0238557	8.33503	7.48262	9.09284	7.61989	8.70538	8.59195	7.4318	8.18026	7.98773	8.01199	8.48363	7.39985	8.73169	8.48617	7.50549	8.24134	9.43765	8.40176	9.24792	8.05496	8.65915	8.16447	8.0056	8.00794	6.84494	6.38431	7.39968	8.7276	7.53128	8.92909
ENSA	0.969437	1.16193e-05	0.00025095	9.20183	8.23239	8.96917	9.20081	8.92815	9.53554	9.2412	9.09201	9.53006	9.05724	9.50245	8.68965	9.44969	8.5105	9.78032	9.31241	8.79745	9.43335	9.52228	8.61074	9.28427	9.51169	9.63834	8.51944	8.39729	7.50795	7.63268	8.55942	8.77756	8.84287
ENY2	1.13597	1.00747e-05	0.000226211	9.57867	8.4427	9.21246	8.98634	9.18232	9.15107	9.25372	9.8311	9.70491	9.21757	10.075	9.71734	10.0658	9.49781	10.2894	9.57542	9.8562	9.08045	9.50202	10.5398	9.38346	9.43335	9.91415	8.49868	8.29337	7.44577	8.21386	9.28935	8.91519	9.26106
EP300-AS1	1.6858	2.42034e-07	1.30299e-05	8.10308	6.41728	8.22632	7.87966	7.41261	7.78144	7.97361	8.19582	7.84628	8.63504	7.94135	7.7003	8.21551	9.30417	8.83774	7.58827	7.96554	8.88113	7.55318	7.75231	6.99485	8.78021	8.49476	6.16776	6.15564	6.02537	5.84399	7.27249	7.0384	8.30765
EPB41L1	1.07115	0.00177475	0.0112079	6.87227	5.80111	6.29239	7.28292	7.33251	6.65388	6.26613	5.99649	7.73655	6.05953	6.58985	8.06422	6.98885	7.09312	6.6341	7.80926	6.09462	8.18368	6.64815	5.87786	5.76777	7.3944	6.89711	5.4839	5.40106	5.5649	5.36954	6.23528	6.75201	7.52646
EPCAM	3.30816	1.24823e-12	6.34657e-10	13.1254	9.81729	12.799	12.7721	12.6855	13.2446	13.376	12.4673	13.1768	12.8498	13.1111	13.8631	13.4965	13.6643	12.0517	13.0162	13.4675	12.9339	13.5184	13.1331	13.8045	12.7865	13.1967	9.27945	8.2618	11.372	9.91517	9.42673	10.6486	13.3455
EPHB4	0.963893	0.00623359	0.0272548	7.16454	6.20064	7.10989	6.64173	7.74271	7.94614	6.42081	6.13502	6.59724	6.8312	6.36862	6.81593	7.45566	7.90088	7.43573	7.91136	5.65318	8.5677	7.71711	7.7298	6.38356	7.92374	6.62632	5.67001	6.10997	5.64951	5.75761	6.92043	7.09634	7.70552
EPHX4	3.32649	4.36234e-07	2.04111e-05	7.08679	3.7603	7.41842	5.31312	7.59262	7.02213	5.83469	9.1912	8.77826	4.7988	7.20877	5.49658	7.37889	4.8389	8.11421	8.98042	7.23151	6.82982	6.21949	8.70915	6.92135	6.76064	7.86889	3.86446	3.66962	4.51994	3.50792	3.83975	3.16013	7.40149
EPPK1	1.01984	0.0370323	0.0928648	9.79926	8.77943	10.1524	10.3446	8.46632	8.5419	10.2781	9.55831	10.0529	9.94236	11.2166	9.92514	8.5006	9.79637	10.8028	8.59042	10.8866	9.54195	11.1663	6.67337	8.95965	11.122	10.0183	8.20073	9.08951	8.29974	8.39965	8.91205	9.77488	11.0467
EPRS	1.29257	1.85597e-05	0.00036027	9.55675	8.26419	9.4082	9.44111	9.0424	9.76003	9.10707	9.99499	9.70395	9.10119	8.14857	8.71091	9.43765	9.77684	10.3467	10.1792	9.3327	9.64801	9.52667	9.47781	9.69168	10.4565	10.16	7.82759	8.0694	7.57609	7.94115	9.07105	9.09982	9.79637
EPS15P1	0.908159	0.000876212	0.00670717	4.06632	3.15816	4.53428	3.7733	4.4733	3.35589	4.18949	3.8942	4.32895	3.72797	3.81126	3.59705	4.23562	4.90611	4.69551	3.61471	3.46949	5.29863	3.35795	3.85334	3.60384	3.84745	3.89946	3.79469	3.53162	3.0045	2.90218	2.37101	3.34493	4.99114
EPT1	1.95527	4.96916e-08	3.98928e-06	8.39313	6.43786	8.63281	8.01462	8.29308	8.58349	9.32747	7.84607	8.36131	7.76093	8.28167	7.2934	9.59546	8.96036	7.37787	8.84642	7.84859	8.40367	8.76183	8.60185	8.30294	7.66216	9.3916	6.08236	5.963	6.38299	6.11272	7.11098	6.97512	8.50136
ERBB3	1.30882	0.000254698	0.00268796	8.21141	6.90259	7.26271	7.8025	9.22405	7.93906	8.6295	8.59796	9.43469	8.05426	8.14285	8.53114	8.41587	8.71388	7.30982	7.52994	7.7762	8.50136	8.7261	7.08649	8.00477	8.15136	9.00603	6.05974	6.00701	6.68363	6.6882	7.42527	8.55168	7.8105
ERCC3	0.72918	0.00332386	0.0176327	8.29312	7.56394	7.95121	8.28927	8.32264	8.71435	8.0584	7.77176	8.61835	7.49158	8.06307	8.10818	8.38105	8.56548	8.85931	8.89706	7.76223	8.40543	8.49417	8.42031	7.65692	8.52325	8.37515	6.87333	6.82982	7.01601	7.51299	8.52543	8.62609	8.71957
ERGIC1	0.599508	0.000708698	0.00573983	7.43426	6.83475	7.35864	7.48869	7.82134	7.64448	7.1369	7.51678	7.90151	6.93047	7.45849	7.34966	7.46385	7.31511	7.68869	7.82134	7.18975	7.6467	6.80333	6.80901	7.41872	7.40275	7.80396	6.431	6.9184	6.58307	6.45175	7.46143	7.16286	7.58355
ERGIC2	1.19291	4.17388e-06	0.000114782	9.40584	8.21293	8.61636	8.8751	9.3008	9.76711	9.86541	10.2131	9.01019	9.08894	10.2759	9.23476	10.138	9.76244	9.06779	9.22405	9.19922	8.84234	9.33501	9.18133	9.81741	9.71627	9.16573	8.02402	7.78447	7.94303	7.98057	8.96963	8.57584	9.23124
ERGIC3	1.31626	0.00486051	0.0229485	8.63373	7.31747	8.32523	10.3131	9.10169	9.79948	6.99752	6.77711	8.83613	8.64557	8.97819	7.08165	8.6194	8.50025	8.78021	9.49173	8.57344	8.86783	8.79524	7.41807	8.00014	8.91324	10.5007	6.84422	7.3255	6.18444	6.48594	8.22428	8.84042	8.62609
ERH	0.880486	1.74638e-05	0.000342924	11.834	10.9535	11.8399	11.9068	11.7633	11.7263	12.4505	11.2524	11.8767	12.3764	11.748	11.7683	12.0403	11.5284	11.3873	11.7738	11.9931	11.7236	11.9232	11.5901	11.4854	11.9097	12.0839	11.0426	11.0132	10.2675	10.2675	11.4854	11.6451	12.2009
ERI3	1.17162	0.00128964	0.00890645	7.2867	6.11508	7.24995	7.83404	8.54613	7.88641	6.05194	6.26579	7.70482	6.75074	6.56336	5.9052	7.46978	7.85337	8.32111	7.7351	6.36753	7.75387	6.51088	7.27645	7.16545	8.25599	7.46898	5.4728	6.10106	5.54807	5.71308	6.90883	6.94661	7.37046
ERO1L	1.00505	0.000689536	0.00562646	8.83685	7.8318	8.91876	9.95212	9.39437	8.7475	9.80249	9.28533	8.42158	7.91832	8.70631	9.84401	8.28309	9.63986	8.45568	8.30438	8.43398	9.031	7.80438	9.36634	8.54307	8.30765	8.63814	8.28832	7.35983	8.19945	7.37134	8.13454	7.63731	8.6123
ERP44	0.745455	0.00435727	0.0212341	8.549	7.80354	8.23592	8.07206	8.51179	8.64473	8.89348	8.59835	8.23678	7.56393	9.00736	8.81193	8.9941	8.66706	9.48828	9.29384	8.32663	9.0942	7.5165	8.10449	8.71388	8.5965	8.27713	7.63649	7.37339	7.25957	7.29582	8.8742	8.38177	8.42896
ERV3-2	1.22461	0.0055986	0.0253661	7.44969	6.22508	8.16447	7.49454	8.3215	6.87051	8.19444	9.20627	6.21975	7.78873	5.93073	7.65936	8.32014	6.95192	5.57997	6.62128	6.78433	7.83609	9.07014	7.45829	7.72103	7.34904	5.82474	6.79277	6.16013	6.61256	5.99742	5.9334	5.85419	8.52599
ESCO1	1.293	4.76649e-05	0.000753679	8.14213	6.84913	7.64912	7.51513	8.72954	8.65384	7.5628	7.26219	7.0196	8.71119	8.07288	8.02109	8.68906	8.89213	7.64422	8.01664	8.44355	8.78021	7.94421	8.2463	7.64461	8.80248	8.1632	6.61256	6.278	6.11573	6.50457	8.0056	7.57832	8.66286
ESCO2	0.819806	1.08606e-05	0.000238703	5.21719	4.39738	5.56534	5.09375	4.6274	5.15597	4.95958	4.93406	4.73226	5.24889	5.02215	5.00823	5.36543	4.85057	5.86319	4.89894	5.42908	5.15853	5.77127	5.92093	5.24982	5.18183	5.28962	4.60069	4.40725	4.67432	4.3725	4.08372	4.2458	5.45126
ESF1	1.34892	0.000508689	0.00448336	8.09486	6.74594	8.55995	7.70684	7.48489	8.22428	7.56186	6.71068	8.54884	8.53321	8.34524	6.26082	8.51898	8.79292	7.94092	8.15611	7.51274	8.24015	9.00642	7.14515	7.99544	9.1874	8.37317	6.28468	5.69399	6.30661	6.89929	8.01059	7.28051	9.28099
ESM1	1.83958	7.19697e-05	0.00102596	6.06089	4.22131	7.02678	6.22177	4.43976	6.52302	5.94261	5.3332	5.14553	4.81793	4.87184	7.30211	6.98927	5.89255	6.07411	7.85182	6.58778	4.7733	6.47467	4.87319	6.74046	5.93188	6.60528	4.96786	4.37659	4.29278	4.7958	3.25661	3.63822	6.92068
ESR1	1.05369	0.00874275	0.0343938	8.47739	7.42369	8.58847	9.48179	8.55801	8.94069	7.9307	8.51225	8.91152	7.06118	9.18006	7.51079	8.10118	9.10424	8.92075	8.38981	9.46525	8.89136	7.46143	6.52614	7.72789	8.3424	9.16468	6.79392	7.28676	6.81593	6.83	7.69603	9.11952	9.73189
ESRG	1.22408	0.0411499	0.0996152	5.20046	3.97639	4.94499	7.03922	8.00499	6.10979	3.96069	6.53051	5.5907	4.39639	7.04117	4.32644	3.71834	3.68153	7.94173	4.90085	4.07631	6.80923	5.34152	3.64337	4.29534	3.78732	4.37848	4.1209	3.84298	4.00114	3.95569	4.10915	3.82845	3.89129
ESRP1	2.577	8.89494e-12	3.33633e-09	10.4943	7.91729	10.2505	10.137	10.1045	9.97529	9.96044	10.205	10.9787	9.33934	10.8612	10.9423	10.7096	10.2394	10.8887	10.6909	10.6647	10.9839	10.3388	10.6337	10.5139	10.8392	10.9803	7.57109	6.99133	8.62642	8.01182	7.25579	9.04726	10.6368
ESRP2	1.1118	0.000991787	0.00736085	8.02101	6.9092	7.85404	7.95851	8.20878	7.50296	7.22302	7.21312	7.57703	6.79681	8.04171	7.17859	9.81532	8.26327	8.19983	8.61491	7.67236	8.70056	7.69992	8.42654	8.51179	9.07799	7.52389	6.14045	6.45679	7.0718	6.68446	7.38485	7.71688	8.40117
ESYT2	1.22266	0.000165059	0.00193569	9.84692	8.62427	9.89976	10.2959	9.63834	9.84596	9.43576	10.683	10.1616	8.45542	10.1969	10.6845	9.30128	10.9045	9.88882	10.0928	9.14192	10.3952	8.89813	10.2453	8.74681	10.3712	9.38787	8.49082	8.17988	8.26971	8.23853	9.35231	9.21435	9.96131
ETFB	0.693278	0.0421011	0.101272	9.00568	8.3124	10.1443	9.03273	9.31769	8.44973	8.65255	8.22101	9.44169	7.48275	9.70658	9.07909	8.60033	8.88701	10.3363	10.0884	8.35074	9.60039	8.58941	8.77985	8.5404	8.88378	8.85212	8.67074	7.3626	7.5921	7.65735	8.96164	9.62996	9.08805
ETNK1	1.47785	1.58589e-05	0.000318291	8.61286	7.13501	7.91897	8.8291	8.9254	9.16508	8.12108	8.38775	8.18874	8.08262	8.76943	7.40554	10.0047	8.44633	8.81955	8.88426	7.81609	8.35662	8.85212	8.72826	8.78112	9.16827	8.4502	7.23219	6.45651	6.31491	6.58614	8.49977	7.72054	9.38176
ETV3	0.990167	0.000219176	0.0023971	8.49588	7.50572	8.09196	9.33809	8.4881	8.60789	7.90088	8.08571	8.61589	8.24722	8.47548	8.49293	8.63281	8.52139	9.64599	8.21496	7.44724	8.78384	8.37998	7.87675	8.07267	9.01313	8.51225	7.15075	7.30111	6.95299	7.48489	7.9631	8.18145	9.46426
ETV4	0.766941	0.0347873	0.0889012	7.08784	6.3209	6.84079	6.13278	8.16418	7.03956	7.10998	6.7722	7.00779	6.68214	6.41755	6.15033	7.91364	6.44307	6.94181	9.7593	7.42885	7.18661	7.59013	7.37519	7.35068	6.43225	7.40488	6.55862	6.43905	6.76763	6.68558	5.70075	5.77376	5.78875
ETV5	0.604299	0.0427123	0.102382	7.65944	7.05514	7.692	8.46854	7.43939	7.71768	7.51462	7.61863	7.60851	7.14455	7.40253	7.03945	9.18704	7.53086	8.20148	8.37957	6.65795	6.90506	7.84432	7.49375	7.37652	7.80047	7.32666	6.40098	7.02025	6.39136	6.29335	7.80462	8.42031	8.15814
ETV6	1.37631	1.56466e-06	5.35919e-05	7.45449	6.07818	6.90687	7.34045	8.38317	8.07762	7.7932	8.33142	7.48841	6.88048	6.91083	7.69848	7.46898	7.32772	7.40707	7.55349	6.46497	7.82888	6.80618	7.58487	7.06308	7.80703	7.5138	5.71053	5.69492	5.9761	5.50927	6.89124	6.68701	7.3618
EVPL	0.700184	0.00217694	0.013032	6.88818	6.18799	7.05849	6.45079	6.82027	6.74668	6.6666	6.713	8.09867	6.03943	7.14248	7.17999	7.84475	6.63796	6.80843	6.75427	6.52148	7.16381	6.24885	6.97596	6.2949	7.23524	7.40962	6.26686	5.9087	5.93811	6.02646	6.44312	6.54471	6.72821
EXOC5	0.868178	0.000527047	0.00460228	6.7843	5.91612	7.25717	7.02948	6.39338	7.32216	6.39589	5.97905	6.82139	6.26744	6.06629	6.51959	7.67073	6.87966	6.78461	6.98719	6.4762	7.04833	6.28372	6.44519	6.50357	7.30603	7.5056	5.74257	5.34853	5.55843	5.74218	6.72096	6.38406	7.31194
EXOC6	0.637198	0.000622147	0.00520084	6.77325	6.13605	7.00417	7.0067	6.7122	6.67238	6.66196	6.49395	6.70759	6.54607	6.47988	6.86961	6.74152	7.09793	6.48242	7.06743	7.42673	6.434	6.84643	6.64209	5.95617	6.81874	7.33704	6.16651	5.88199	5.65484	5.84282	6.91568	6.35447	7.00649
EXOSC1	0.895457	0.0013869	0.00941898	7.13144	6.23598	7.33718	7.52971	7.68957	7.77712	6.43778	6.69822	7.15961	7.80334	6.54471	5.98422	7.7475	7.56592	7.20732	7.07365	6.73275	7.52536	6.83793	7.04995	6.19868	7.13014	7.64169	5.8131	6.05359	5.60558	5.72163	7.05189	7.17007	7.21924
EXOSC4	1.36898	5.82515e-07	2.5435e-05	8.75678	7.38779	8.57719	8.97026	9.1104	8.57117	8.70538	8.309	9.44471	8.61074	8.95643	8.12766	8.43494	8.527	9.81251	9.26899	9.19376	8.47885	8.24481	8.77305	8.1983	9.00603	9.39097	7.07628	7.38212	7.09049	6.97178	7.78347	8.02262	7.93692
EXOSC7	0.826957	0.00219285	0.0130896	8.25485	7.4279	8.22499	8.89348	8.44116	8.82972	8.547	7.60259	8.23895	7.90485	7.31851	8.14877	8.27797	8.09196	8.88681	9.61746	7.73273	8.45249	8.54857	8.05463	7.49661	7.66339	8.85471	7.25902	7.33222	7.01072	6.91976	7.85795	8.1877	7.77941
EXPH5	0.959186	0.00327271	0.017426	6.87503	5.91584	6.8916	7.44309	6.44559	6.18382	7.20033	7.78473	7.3541	6.65657	6.19623	7.24678	6.94025	7.34099	7.19333	5.82879	6.32501	7.89538	6.10098	6.17005	6.04536	6.8573	7.36296	5.01347	5.1767	5.56712	6.7425	6.96762	6.02763	7.78732
EXT1	1.32225	0.000529288	0.00461689	8.14927	6.82702	7.38634	7.63707	8.27906	8.62174	7.39661	7.50466	8.71388	7.33501	8.75048	7.19287	9.12064	8.73137	8.90211	9.89123	7.28858	7.83436	7.54288	8.39802	7.44954	8.24449	8.05523	6.09367	6.44844	6.35342	6.29301	7.92753	7.84607	9.00776
EYA2	2.42904	0.000708247	0.00573983	8.55766	6.12862	9.98433	6.56052	10.2505	8.08829	9.87647	8.35049	8.76497	5.57775	10.4435	7.95742	8.22833	8.60709	8.35817	8.1293	10.2894	9.29332	6.9171	4.66488	10.5839	9.39326	9.59743	5.58628	5.34912	6.33703	5.49043	6.28264	7.7262	8.35199
EZH2	2.17695	4.5388e-08	3.68254e-06	8.29794	6.12099	8.65502	7.15522	8.82733	8.35459	7.35198	7.75726	7.95879	9.55432	7.17215	8.94093	8.30552	9.0027	8.57884	7.68957	8.13633	7.87743	8.85471	9.19549	7.3869	9.23935	8.46465	6.49455	5.65825	6.55143	5.60865	6.62394	5.78912	8.09558
F11R	1.20109	1.63285e-06	5.53477e-05	9.99693	8.79585	9.45342	9.65662	9.87857	10.1953	10.0595	10.0319	9.70828	9.53869	10.5977	9.61534	10.0306	9.68325	10.1842	10.5048	10.7665	10.0319	9.95137	9.31812	10.0627	10.4139	10.001	7.96001	8.43294	8.66116	8.65502	9.34166	9.72429	10.2488
F2RL1	1.38344	0.000163744	0.00192225	8.496	7.11256	8.81165	8.92966	7.5377	8.46712	7.67439	9.02185	9.58965	8.5584	7.06308	7.96067	9.49547	8.67717	8.04031	8.77796	8.23564	8.17213	8.14319	8.10684	8.04574	8.22216	9.35059	6.27492	6.30229	7.0702	7.31943	8.04938	7.65912	10.0306
F8A1	0.993624	0.0061014	0.0268152	9.79646	8.80283	10.2204	9.30449	10.836	9.98508	10.0884	10.4472	9.72616	7.7239	9.24221	10.1297	9.79797	9.99499	9.88114	10.9503	10.1337	9.73256	9.0563	11.2508	9.06542	9.64757	9.01961	8.68532	8.33115	8.39558	8.08905	9.39437	9.92152	9.28819
FAAH	0.718379	0.0319811	0.083808	7.28053	6.56215	6.84846	9.24166	7.4508	7.59561	7.08234	6.20954	8.19737	6.47847	7.05789	6.65494	7.10952	7.175	7.60543	8.07106	6.76859	7.96657	6.62515	5.92742	6.90697	7.93516	7.48275	6.11382	6.46244	6.20093	6.29753	6.73141	7.56676	7.78092
FABP6	1.29968	0.0201312	0.0601699	5.9199	4.62023	7.43217	7.06655	6.58812	7.36776	5.06342	4.78384	6.89826	8.12627	7.90873	4.47709	5.16177	7.59405	4.44491	4.85323	5.14299	4.23064	5.48782	4.96118	4.47861	4.52368	6.59704	4.37078	4.55613	4.80173	4.55759	4.3357	5.09942	7.04975
FADD	0.717507	0.0127444	0.0445296	7.95244	7.23494	7.66531	8.33472	7.16368	7.9294	8.44931	7.62755	7.81087	7.24256	8.45323	7.70367	10.2349	7.75934	8.03114	8.20468	8.14167	8.0584	7.36371	7.95255	7.78926	7.82349	7.73826	7.29248	7.31005	6.63675	6.59909	7.86703	7.70422	7.47606
FADS2	1.19894	0.0308121	0.0813972	7.04159	5.84265	6.39061	5.89338	7.80586	8.17063	5.78827	6.63093	6.35536	7.28138	7.93864	5.25398	8.75088	8.97364	7.04691	6.98548	4.93799	7.31995	6.493	5.79495	5.65011	9.21435	8.64793	5.42273	5.1202	5.21483	5.43062	7.75421	6.1133	7.59067
FAHD1	1.03255	0.00148842	0.00988909	8.37802	7.34547	8.4235	8.54982	8.19043	8.49476	8.83017	7.81374	9.01162	7.95289	8.88782	6.95624	8.40326	8.4353	8.63814	8.60709	7.35818	7.80483	7.44386	8.46264	9.244	9.39735	9.18006	6.68142	7.63489	6.56613	6.80188	8.44883	7.93968	8.23076
FAIM	1.51208	8.74151e-05	0.00119478	8.08644	6.57436	8.47629	8.14556	8.14008	8.04529	8.29017	7.83045	8.02402	6.53579	8.45092	9.1588	7.9998	8.78112	8.4502	8.66512	5.58906	7.91213	8.27834	7.70011	9.20929	8.06554	7.75421	5.92152	6.55104	6.21939	6.25727	7.46045	7.03645	8.39931
FAM104B	0.767263	0.0292124	0.0783147	6.88107	6.11381	8.20867	6.73935	6.70407	7.14165	6.75128	6.37586	7.43685	6.63191	6.73557	5.67959	7.00624	7.7239	7.64493	7.63413	5.90904	6.50484	5.51469	6.34158	5.95795	7.46685	8.16418	5.18003	6.01232	5.84737	5.65665	7.08038	6.9061	7.11047
FAM107A	1.44791	0.00975177	0.0370431	7.51964	6.07173	7.21335	8.1963	5.87659	6.29511	8.18874	6.38645	8.436	5.82936	7.51513	6.69594	6.16316	7.98872	9.57819	7.28416	6.45308	10.0025	7.93618	5.54325	8.18026	9.73525	7.74636	5.84069	6.03557	7.22015	6.08765	5.12227	6.12408	8.18806
FAM111A	0.801706	0.00858854	0.0339928	8.0106	7.20889	8.29631	8.29534	7.15331	8.06279	8.45169	8.00954	8.51179	7.39852	7.28036	7.89143	7.8634	8.55268	8.14098	7.63541	6.79609	7.48224	7.18043	8.85506	8.92176	8.23016	8.50671	7.51108	6.43998	6.49802	6.66175	8.18145	7.96106	8.71714
FAM111B	0.926144	4.96903e-05	0.000778175	5.33542	4.40927	5.50198	4.90796	4.91809	4.90478	4.86086	5.1943	5.65484	4.893	4.87878	5.5543	5.76707	5.37226	5.7377	5.17565	5.0012	4.81456	5.02933	5.15333	5.69877	6.278	5.72673	4.10433	4.48425	4.68707	4.30129	4.33222	4.54647	6.35563
FAM117B	1.88214	1.71103e-08	1.73993e-06	8.54588	6.66373	8.69263	8.62809	9.0527	9.04977	7.77966	7.8804	7.97334	8.52526	7.8483	7.92135	8.75142	8.88869	8.46792	8.72108	8.70836	9.37679	8.8884	7.12718	9.04628	8.56669	9.28372	6.66273	6.3993	6.34762	6.21125	7.08575	7.27574	8.83125
FAM127B	1.052	0.00367745	0.0188486	8.40178	7.34978	7.72711	8.57719	8.49004	8.89994	8.52738	7.90873	8.56669	8.05072	8.23564	7.62671	8.4126	8.08905	9.31136	9.59826	8.65421	8.67863	7.50713	9.95273	6.71094	8.83161	7.74881	6.34093	7.57081	6.91733	6.68303	8.14266	8.44394	8.73377
FAM129B	0.80707	0.00149143	0.00990066	7.12698	6.31991	7.34814	7.23875	7.39362	6.8776	7.06325	6.96506	7.3502	5.80033	6.76679	7.68704	7.2086	7.10728	7.83709	7.6868	7.03568	8.01364	6.36324	7.19937	6.33982	7.20461	7.49375	5.8022	6.00778	6.24155	6.09385	6.64863	7.12546	6.81291
FAM131A	0.78813	0.000206629	0.00229745	7.074	6.28587	6.8831	6.64431	7.27645	7.17657	6.61256	6.97806	6.69552	6.61972	7.77416	7.22877	7.56027	7.67841	7.23335	6.92855	7.16442	6.90925	6.71167	6.95684	6.55606	8.018	6.68863	5.92748	6.0899	6.0872	6.12167	6.81308	6.6759	7.33336
FAM132A	0.59135	0.00293948	0.0161206	6.64833	6.05698	6.41106	6.43068	6.46765	6.25493	7.65307	6.268	6.28593	6.64334	7.16725	6.66409	6.78108	6.74403	6.49384	6.46797	6.65437	7.37211	6.73664	5.72173	7.04362	6.7722	6.54685	6.68049	6.13669	5.83066	5.83627	6.01232	5.84544	6.68282
FAM133B	1.05736	0.000111196	0.00143901	9.17982	8.12246	9.06211	9.26153	8.37998	9.21558	8.68423	9.74133	9.31892	8.91742	9.42557	9.43533	10.0742	9.42867	9.22078	9.02811	8.33943	9.67626	9.14491	9.11638	8.513	9.22132	9.08805	7.97244	7.51025	7.50097	7.51914	9.27468	8.95728	9.66286
FAM134A	1.19001	1.33051e-06	4.7197e-05	9.61279	8.42278	9.49411	9.90279	10.0841	9.36354	9.55831	9.66011	9.84596	8.89003	9.26501	9.0696	9.72499	9.54195	10.0098	10.2683	9.33375	10.0071	9.19549	9.46571	9.40359	10.1893	9.40534	8.12652	8.52293	7.85085	7.80533	8.8687	9.36235	9.80249
FAM136A	1.58139	6.06222e-07	2.61212e-05	10.7246	9.14318	10.7532	10.1768	10.4286	10.8994	10.7602	10.8077	11.1742	11.0218	11.247	10.8721	11.583	11.1027	10.0725	10.9695	10.7555	11.4907	10.7691	9.36077	9.65662	10.2283	10.9586	8.68365	8.89752	8.99166	8.58281	9.98273	9.72069	10.8523
FAM161A	0.697385	0.0224345	0.0649421	6.84891	6.15152	7.0067	6.0934	6.49145	7.26474	6.31388	6.33355	6.38665	7.94021	6.14452	6.57231	7.60316	7.29121	6.27718	7.36085	6.50389	5.65867	7.24857	6.49145	6.67278	7.2228	7.4636	5.51355	6.08207	5.93039	5.76516	6.6303	6.98765	8.33434
FAM162A	0.835512	0.003241	0.0173196	11.3681	10.5326	11.9666	11.778	11.4661	11.3009	10.7805	11.6779	11.2866	11.3951	12.1795	12.0603	10.5345	11.4165	11.842	11.6747	10.7074	11.3951	11.3102	9.69648	10.9639	11.6257	11.3172	10.2721	10.6214	9.94155	9.85558	11.0454	11.4597	11.7236
FAM171A1	2.76584	3.32499e-08	2.88166e-06	10.015	7.24913	9.60492	10.1953	10.3022	11.4621	10.0016	8.2928	10.6609	9.62521	9.06488	8.60471	10.8612	10.1387	10.3673	10.566	9.89005	10.9076	10.2894	8.05908	9.83027	10.1608	10.3318	6.58704	7.18452	7.12091	6.71258	7.4636	8.42612	11.1124
FAM173A	1.20125	0.000987339	0.00733937	8.09635	6.8951	8.93801	8.57193	7.74092	8.40874	8.37808	8.05806	8.3549	7.67279	7.32508	6.39589	8.44422	9.03222	8.32586	8.8233	6.87828	8.39197	6.45257	8.46824	7.63902	9.25752	8.48298	6.47869	6.84352	6.38856	6.5342	7.58632	7.53934	8.07914
FAM173B	1.13919	4.74085e-05	0.000750661	7.4389	6.2997	7.18661	7.38821	7.47544	7.10021	7.04719	7.76362	7.87836	7.38767	6.80643	6.4358	7.39496	7.26474	8.26582	8.26327	7.82799	7.23572	6.96617	7.08966	7.4641	7.77284	7.58787	5.60063	6.03481	5.72036	5.99132	7.41018	7.04092	8.05303
FAM174B	1.21673	0.000240492	0.00257124	8.32305	7.10632	7.81922	7.79839	8.77154	7.90534	9.20039	8.25019	8.8282	8.64344	8.19269	7.41483	8.56426	8.0412	8.09423	7.73273	9.33539	10.1648	8.10449	8.50136	9.12883	7.32834	7.73721	6.76659	7.14613	7.65372	6.81615	7.16691	7.08841	7.55003
FAM181A	0.737199	0.0197806	0.0594718	7.55697	6.81978	6.96617	7.12749	8.00589	8.15043	8.73683	6.99485	7.0074	7.95088	7.03023	7.28375	8.88801	7.82611	8.30222	7.65655	6.92344	7.43113	7.31694	6.18333	7.72078	8.19666	7.08059	7.79432	6.88	7.05487	7.16381	5.70205	6.3236	7.4738
FAM195A	1.74514	0.000167374	0.00195496	9.06156	7.31642	9.73772	10.8028	9.05429	9.33322	8.6968	8.51023	8.73377	8.25634	7.92401	7.5322	8.66818	10.0957	9.74818	10.0002	7.61889	9.97108	7.53902	9.70552	8.13425	10.567	9.40359	6.91976	7.35951	6.87042	6.74849	7.7239	8.27645	9.32138
FAM201A	0.669757	0.0232309	0.066659	5.29006	4.6203	5.06666	5.56802	6.25167	4.24138	5.45447	5.84089	4.89569	4.6084	4.96574	4.90228	5.61802	4.24987	6.71498	5.32554	4.4748	4.76736	4.97666	6.28048	5.37617	6.36134	4.82756	4.70664	4.51879	4.54787	4.50828	4.61031	4.8299	5.61327
FAM207A	0.588162	0.0181218	0.0560602	6.00032	5.41216	6.34775	6.58367	6.07973	6.11791	6.06503	5.31442	6.821	5.21865	5.35926	5.44267	5.91715	6.37975	6.48201	6.72239	5.34171	6.88816	5.18357	6.12063	5.41338	5.93544	6.63636	5.45679	5.31117	5.18632	5.07866	5.65134	5.78867	5.63638
FAM208B	1.3842	6.38571e-08	4.83792e-06	8.12361	6.73941	7.94211	7.92258	7.65936	8.6968	8.08949	7.42201	8.23381	8.20762	8.06279	8.3234	8.62137	8.2091	8.4235	7.75198	7.31804	8.48967	7.56922	8.04633	8.24256	8.46991	8.4377	6.32707	6.48201	6.44592	6.52098	7.71078	6.94971	8.58011
FAM20C	1.01354	0.0115569	0.0416805	7.42983	6.41629	6.29804	7.20169	7.84709	7.19744	6.05864	7.21017	8.11759	5.97532	8.27404	6.89568	8.60789	8.45622	8.26405	7.95879	5.60902	8.89706	6.76166	7.60488	6.94571	7.87836	7.74302	6.78186	5.89037	5.91875	5.91273	7.24032	6.75368	7.65395
FAM210A	0.986731	0.00197016	0.0120948	6.95963	5.97289	6.87137	6.96361	7.03138	6.62772	6.493	5.58698	7.38325	6.9313	6.56912	6.15449	7.5716	7.39255	6.91733	7.24007	6.88369	6.59647	6.41382	8.39825	6.11149	7.80571	7.72325	5.7892	5.64189	5.44295	5.37846	7.13162	6.45325	7.44532
FAM213B	0.965912	0.000378855	0.00362201	7.87843	6.91252	8.31972	8.73988	8.12383	6.85357	7.46869	7.67555	8.00823	7.35591	8.20499	7.94446	7.53342	8.2608	7.57514	7.81954	6.79431	8.98124	7.08841	7.7738	7.80364	8.39802	8.49293	6.67917	6.88793	6.86662	6.42025	7.2508	7.37032	8.10932
FAM216A	0.982011	0.0277944	0.0757065	9.05202	8.07001	9.55766	9.89216	8.70447	8.76298	10.3278	8.87773	7.94584	9.15079	8.46264	7.21179	8.4807	10.8218	10.2883	9.4984	7.3306	7.63514	9.57682	8.31305	9.66144	8.70203	9.26585	7.94989	8.26634	7.30334	7.41366	8.82568	8.66116	10.6765
FAM217B	0.863572	0.00177956	0.0112228	8.6228	7.75923	8.44245	8.91876	8.72214	8.21819	7.37763	8.14745	9.10536	9.33375	8.26146	8.23432	8.77756	9.02761	9.14237	9.16082	8.06279	8.60074	9.02435	8.43122	8.57158	8.34762	8.05373	7.47276	7.42214	7.23903	7.25028	8.57535	8.59582	9.7397
FAM21EP	0.900916	0.000799653	0.00626363	6.5358	5.63488	6.52192	5.90692	6.31814	6.63514	6.44725	7.43305	6.6841	5.88129	6.8562	6.0899	7.05358	6.86047	7.70422	7.82553	6.51633	6.39579	5.74002	5.97774	6.03339	6.85398	5.96449	5.45964	5.58818	5.76476	5.43712	5.83786	5.72173	6.08805
FAM230C	0.812774	0.00338651	0.0178608	4.44266	3.62989	5.29547	4.28218	5.51382	4.02075	3.8662	4.44469	4.19003	4.7512	4.13877	4.07631	5.34117	4.3559	4.33911	4.47794	3.54751	4.83724	3.7733	4.17972	3.68662	4.7468	4.09949	3.16806	3.55544	4.21025	3.88077	3.36467	3.60013	5.77433
FAM24B	0.679507	0.00672964	0.0287051	6.63886	5.95936	6.41277	6.96084	7.18927	6.7049	6.75259	5.94374	5.89394	6.5295	6.2344	5.33921	7.21357	7.12658	6.89568	7.5628	6.60528	6.95204	6.01364	6.33483	6.24476	7.29733	6.76388	5.87604	5.71489	5.67776	5.69471	6.5587	6.23403	7.08344
FAM32A	1.26686	8.10243e-06	0.000192107	10.3828	9.11595	10.0998	9.83766	10.5708	10.568	9.6622	10.6368	10.2666	10.8134	10.4821	9.74185	11.5284	11.3235	9.97327	10.3921	10.4624	10.5265	10.0025	10.3152	10.322	10.1697	10.2959	8.93544	9.00234	8.43815	8.31466	9.96537	10.0397	10.431
FAM35A	0.807949	0.0135161	0.0463087	10.5785	9.77055	10.7207	11.1332	10.725	10.0421	10.6309	10.8824	11.359	10.3267	10.9898	10.4128	9.71038	11.109	10.1562	9.38489	10.2883	11.4722	9.87857	10.2651	9.22838	11.9232	10.9311	9.2805	9.60986	9.06255	9.34576	10.745	10.5796	11.157
FAM3A	0.933966	0.00896427	0.034949	8.22386	7.2899	8.20362	8.13224	9.02677	8.1293	8.39014	9.03929	8.40473	6.56938	7.2722	7.87871	7.77872	8.7155	8.57621	9.4856	7.84038	8.49868	6.74921	9.428	7.28478	9.06488	8.1819	6.70098	7.07947	6.97225	6.89799	7.82261	8.26607	8.27473
FAM3C	1.08885	0.0181285	0.0560602	9.21269	8.12384	8.23938	8.87552	8.63281	9.47283	8.82941	9.6074	9.78224	6.41262	7.53539	10.6348	9.26153	10.1143	9.18521	9.74185	9.63474	10.0228	8.99698	10.5826	8.36726	8.76546	9.86327	7.91936	7.52016	7.08191	7.76338	9.64702	8.8112	10.1207
FAM43A	1.01021	0.0468398	0.109034	7.5272	6.51699	6.78787	7.1187	8.58777	9.3008	7.05882	6.90687	6.70266	7.29408	9.39735	6.12167	9.39202	7.05189	9.09867	7.62442	5.91751	6.58229	6.00563	6.10866	7.32954	7.84038	8.93631	5.99389	6.04005	6.03436	6.13805	7.86045	7.03515	8.43447
FAM46B	0.608246	0.0144744	0.0483819	6.8439	6.23565	6.63053	7.9046	6.55812	6.18296	6.26923	6.59944	8.05035	7.22089	6.80708	7.13907	6.83685	7.34045	6.13509	6.2511	6.7153	6.71178	6.32639	7.16984	6.32616	7.32723	6.41224	6.01409	5.95242	6.63747	6.3998	6.07457	6.33553	7.651
FAM49B	0.76855	0.000682494	0.00558693	8.00518	7.23663	7.45027	7.67191	7.43036	7.93004	7.7392	8.06801	8.90078	7.67612	8.25089	8.38631	7.62812	8.4235	7.88656	7.71544	8.95728	7.62636	8.33028	8.56227	7.4172	7.98564	8.38317	7.686	6.80878	6.98787	6.96991	7.61416	7.3531	7.69434
FAM50A	0.952421	0.0337813	0.0871381	8.99953	8.04711	9.69494	8.7721	10.2283	9.65899	9.2555	10.1853	9.43533	6.7302	8.59632	8.80655	9.02185	9.19999	9.11754	10.1524	8.95369	9.81251	7.44187	10.243	7.0488	8.59615	9.14431	7.99036	7.70614	7.01875	7.43713	9.01569	9.11458	7.89405
FAM53C	0.860258	0.00116994	0.00827713	10.1211	9.26083	10.5276	10.2836	10.3423	10.1317	10.3988	9.12287	10.321	10.408	10.4967	10.3724	10.2306	10.3477	10.0178	10.1953	9.34463	9.29384	9.98572	9.32333	9.57469	10.469	10.4337	8.91205	9.09921	8.82623	8.55942	9.88738	10.2807	11.0426
FAM58A	1.78426	0.000308141	0.00310584	9.30806	7.5238	10.201	9.49607	10.4821	9.45284	9.91797	8.96777	9.87548	7.50838	8.52262	8.65633	9.55281	9.74604	10.0978	11.1699	8.48026	9.87231	7.13648	10.7502	7.72945	8.97977	9.13784	7.24194	7.46196	6.94758	6.6226	8.09348	8.77523	9.04383
FAM60A	1.45367	3.68192e-08	3.12009e-06	11.2273	9.77366	10.8661	10.9878	11.3445	11.5737	10.8677	11.3445	10.843	11.5993	11.1647	11.3788	11.8659	11.583	10.3931	11.3381	11.2317	10.7712	12.2906	10.3603	11.6537	10.8914	11.3609	9.61178	9.8311	9.6531	9.62996	9.64397	10.2721	11.2914
FAM64A	2.12778	1.19018e-07	7.52249e-06	7.62141	5.49363	8.91519	6.66798	7.70117	7.54038	6.09793	8.3549	7.44455	8.44355	7.08603	6.77525	9.05325	7.9641	8.07762	7.45136	7.3129	7.57312	8.59988	7.88794	6.60712	7.46707	7.31018	5.54448	5.17598	5.80818	5.38925	5.68742	5.35648	7.33962
FAM71E1	0.683569	0.0316356	0.0831025	7.00897	6.3254	6.66367	7.10791	8.95005	6.1066	5.97574	6.53326	7.93864	7.53655	7.41401	6.34168	7.34451	7.00056	7.41401	7.07716	6.58877	7.77499	6.11139	6.87838	6.05739	6.525	6.86356	5.99201	6.15862	6.56828	6.48865	6.34304	6.40181	7.99349
FAM72A	2.48846	1.15394e-08	1.31354e-06	9.26306	6.7746	8.95126	8.81811	9.49469	9.31496	8.93801	9.98508	8.72708	9.81813	9.07551	7.80509	9.5157	10.3308	9.81885	8.96119	9.1866	8.74831	9.38787	10.1362	7.62894	9.82958	10.2883	7.53423	5.68551	6.80991	6.20172	7.49045	6.92576	9.02717
FAM73A	0.809445	0.0174222	0.0546279	7.45492	6.64547	6.82961	7.79	7.32486	7.06866	5.96684	7.64075	8.00207	6.54027	7.10588	6.35931	6.94431	7.51049	7.83873	7.75452	8.13292	7.65825	6.92034	8.0569	7.28988	8.58633	7.73133	5.76509	6.29207	6.11427	6.592	7.67314	7.43626	8.95591
FAM83D	3.861	1.7161e-14	2.61763e-11	9.75964	5.89864	9.98572	9.83069	10.1801	10.1608	8.56132	9.33997	9.49469	10.2306	8.72708	9.49102	10.7555	9.6421	10.5227	9.81672	9.58965	9.84992	10.0948	10.0057	8.37159	10.2749	10.0091	5.9399	5.64467	6.96065	5.48721	6.28244	5.07696	9.77732
FAM83H	1.11844	0.000136714	0.00167629	9.04724	7.9288	8.4655	8.82661	9.2633	7.7911	9.42557	9.29594	10.201	8.04633	9.62996	9.739	8.38177	8.91261	9.22838	8.57158	9.41592	9.65254	8.61074	8.86642	8.52139	9.78526	9.69168	7.62495	7.86201	8.03524	7.87966	7.99036	8.1806	8.71672
FAM84B	1.51327	3.06542e-05	0.000532146	9.68828	8.17501	8.64629	9.55004	8.79387	9.87647	9.34336	9.33586	10.3662	9.2151	9.35602	9.08648	10.4953	10.3073	10.4019	9.87548	10.1818	9.62301	9.36154	10.5203	9.30903	9.4503	10.458	7.38666	7.90534	7.26771	7.58022	9.89606	9.0141	9.58839
FAM89B	0.710871	0.0102951	0.0383881	7.8014	7.09053	7.42465	8.48334	7.69905	7.97887	7.37098	7.49977	8.1204	7.49687	8.08193	6.79906	7.70051	7.39174	9.46776	7.84219	7.26168	8.91687	7.22829	7.91703	6.76297	8.39931	7.82553	7.00649	7.22489	7.08254	6.92502	6.93687	7.36737	7.96202
FAM90A1	1.14748	0.00052721	0.00460228	7.20891	6.06143	6.31309	7.46258	8.13425	8.57193	7.7762	6.70664	6.83756	6.92087	6.96945	6.38386	8.29712	7.6843	5.91129	8.57768	6.52249	6.99238	7.1977	7.0349	6.99462	6.98739	7.14819	5.94485	6.0191	5.75067	5.84434	6.11075	6.6989	7.1716
FAM91A1	1.42167	8.01097e-07	3.26141e-05	10.0468	8.62515	8.92352	9.9052	9.41522	9.53803	9.87154	10.6789	10.5367	9.25438	10.7571	10.1641	10.0244	9.93717	10.5898	10.2985	9.86541	10.0365	9.75553	10.6952	9.81813	10.3326	10.1337	8.97977	8.28832	7.97679	8.13127	9.2151	9.15968	10.4986
FAM96A	0.842498	0.00379693	0.019301	10.9322	10.0897	10.446	11.6105	10.6524	11.3087	11.2989	10.0716	11.9703	10.3733	10.3254	10.7665	11.5052	11.3124	10.7747	10.8052	11.6609	10.9472	9.64757	11.3423	11.0111	10.9237	11.4976	10.4427	9.9052	9.43128	9.31852	10.9009	10.5398	10.2575
FAM96B	0.660453	0.0230656	0.066324	10.12	9.45953	8.99301	9.96613	10.4045	10.1289	9.41231	9.55902	9.33375	10.2729	10.8765	9.22729	10.8583	10.0938	11.1756	10.5034	9.6899	10.1724	10.0342	10.812	10.1452	11.0836	9.66286	8.65022	9.93828	9.27504	8.86533	9.78032	10.248	10.234
FAM98A	0.875802	0.0015907	0.0103484	8.87738	8.00157	8.37159	9.32333	8.68386	9.01063	9.44294	9.28271	9.08764	7.92719	8.78606	9.0595	8.63003	9.37236	9.46035	8.84556	8.15247	9.80761	8.67764	8.92434	8.6916	7.90702	8.78888	7.60198	7.70992	7.36141	7.35387	8.95126	9.031	9.06896
FANCE	1.49482	3.02651e-05	0.000526991	8.23655	6.74173	9.05491	6.61027	8.38105	8.6194	7.84724	8.29017	8.19999	9.31708	8.2463	9.26557	8.36599	8.04485	8.02555	7.48224	8.62174	7.09049	8.26698	8.46238	8.04529	9.13838	7.55469	6.22518	6.74643	6.36702	5.90146	7.54347	7.6668	8.2736
FANCG	1.42634	9.49215e-06	0.000216531	8.43262	7.00628	8.97093	8.55268	8.90503	8.13345	8.06652	7.84358	7.93727	9.08236	7.81734	7.96347	8.23955	7.95389	8.99914	7.77663	8.41834	8.42566	8.44422	8.66234	8.06605	10.0405	9.01063	6.29693	6.79601	6.88369	6.3604	7.51951	8.18112	8.20804
FANCI	1.17201	4.79228e-07	2.19734e-05	7.33907	6.16706	7.00624	7.11145	7.36007	7.30302	7.38285	7.18491	7.63413	7.70117	6.80561	6.77993	7.91859	7.66561	7.31194	6.94291	6.89189	7.06269	7.30909	8.6295	7.19093	7.31571	7.83513	6.35226	5.98767	6.23759	6.04569	6.38267	5.99649	7.11611
FANCL	0.758002	0.0105752	0.0391144	10.1374	9.37939	10.0263	9.59168	10.2249	10.3555	9.75266	9.3008	10.1893	10.7946	9.84992	10.7259	10.3457	10.4748	9.14491	9.53006	9.97864	9.62996	10.3535	10.2894	10.0244	10.446	10.5189	8.52024	8.88907	8.80707	9.03273	10.5503	10.477	11.4747
FARP1	0.965196	0.000384804	0.00366472	7.98916	7.02396	7.23986	8.17245	7.78001	7.69964	7.54274	7.22067	8.2608	7.80926	7.93816	8.2516	8.80519	7.95539	7.56367	8.13903	8.23076	9.1588	7.88563	7.44634	7.54347	9.0152	7.86787	6.76233	6.80209	6.7462	6.3236	7.67476	7.83482	8.23497
FARSA	1.45751	5.15307e-06	0.00013398	8.61149	7.15397	8.3709	9.17174	8.83293	9.29332	8.17213	7.11071	8.04308	8.78226	8.61464	7.91755	8.47114	9.72678	8.97977	8.12421	8.29892	9.52858	8.56814	9.15929	8.07655	8.5672	9.14575	7.22849	7.22906	6.49114	6.70603	7.45359	7.81553	8.49714
FASN	0.712855	0.00039964	0.00376167	6.64756	5.9347	6.864	6.24917	6.71832	6.70177	6.61044	6.26342	6.74987	6.29023	6.39289	6.26205	6.92318	6.91815	7.14872	6.55152	6.20172	6.93312	6.41224	6.39617	6.18113	7.08679	7.93259	5.95329	5.83385	5.75092	5.70356	6.25474	6.11186	6.45875
FASTK	1.09803	4.49997e-05	0.000720499	9.81177	8.71374	9.54132	10.1715	9.62769	9.94649	9.33094	10.7062	10.0298	8.95643	9.83702	10.4908	9.84045	10.3162	9.95694	10.0063	9.32049	10.5214	8.89089	9.60787	9.77488	10.0047	9.76354	8.43223	8.52096	8.34434	8.08795	9.27108	9.62584	9.21709
FASTKD1	1.13396	0.00418025	0.0206195	9.67296	8.53899	10.4427	10.5354	7.85966	9.54195	9.29332	8.7332	10.9423	8.77252	11.2105	9.59743	8.94336	10.3495	9.62092	8.81243	9.38908	9.84752	9.49668	8.76943	9.47781	10.7861	10.469	8.60433	7.66216	8.04633	8.39825	9.70552	8.81736	9.91415
FASTKD2	0.726419	0.000347238	0.00340923	7.62175	6.89533	7.77128	7.96202	7.52265	7.8324	7.53865	7.57953	7.99036	6.91004	7.00721	7.45748	7.53055	7.66531	7.95756	7.56745	7.21312	7.80047	7.50851	7.46978	7.91832	7.87613	7.8524	6.55122	6.91134	6.08181	6.52773	7.74604	7.55384	7.74723
FASTKD3	0.768693	0.00701926	0.0295493	8.20285	7.43415	8.29081	8.36093	8.47647	8.77966	7.88707	7.68003	8.09092	7.51513	7.34914	7.2242	8.1983	8.87744	8.60232	8.64514	8.16364	8.42113	7.57301	8.89348	7.76223	8.76415	8.01336	6.78712	7.18157	6.84949	6.85842	8.62393	8.30438	8.89402
FASTKD5	1.20547	0.000451701	0.00410278	7.99238	6.78691	8.63651	8.06966	8.11702	8.59113	7.60316	6.19143	8.79658	8.07253	7.92649	6.41382	8.63737	7.97457	8.36849	8.18145	7.87125	7.86869	7.70117	6.92135	8.29813	9.07676	8.45689	6.56999	6.61137	6.17359	6.45497	7.44233	7.4692	8.05779
FAU	0.758491	0.000444013	0.0040555	13.362	12.6035	13.4335	13.6643	13.3556	13.3556	13.4834	13.0706	13.1859	13.3379	13.7903	13.1768	13.2941	13.3045	13.8631	13.6922	12.6243	13.5964	13.0326	13.6073	12.4214	13.7075	13.4153	12.3764	12.8948	11.9232	11.9381	13.1235	13.3651	13.5516
FBL	1.00111	0.011815	0.0422387	11.8896	10.8885	12.3653	12.7552	13.1235	13.3901	11.0499	10.2386	12.1286	11.8719	12.0839	10.6309	12.2177	11.8577	12.5707	11.092	10.515	12.304	12.1593	11.9292	10.4	12.0709	12.1927	10.4714	11.2016	10.2611	10.2488	11.1964	11.9518	12.6243
FBLN2	1.7924	0.0015789	0.010298	6.9097	5.1173	6.17098	5.20595	7.46636	8.45959	4.59955	6.84388	8.84969	6.43382	7.93933	7.72564	8.89953	7.47042	5.88363	6.69219	6.35285	7.94232	5.52122	7.10365	4.49124	7.13501	7.11145	4.89081	4.55259	4.63573	4.46695	6.0453	6.1124	7.71517
FBN3	1.70415	0.00112109	0.00804344	6.02255	4.3184	6.4115	6.36906	5.93558	7.21516	4.9458	4.82384	5.86668	6.50542	4.91238	5.31748	7.17111	6.32879	5.1619	5.21344	5.08224	4.90249	8.23142	4.37444	5.24843	6.9692	6.52148	4.00007	4.18032	4.26561	4.25022	4.54382	4.67034	8.98822
FBXO22	0.723256	0.00338275	0.01785	6.85471	6.13146	6.52016	7.33919	7.06219	6.94498	6.97848	6.40449	7.23036	6.09367	6.45774	6.96796	7.4944	7.51491	6.93627	6.86652	6.03557	6.6568	5.89434	7.00004	7.14753	7.25181	7.16035	5.56639	5.87551	5.64264	5.79376	7.13602	6.77442	6.84592
FBXO34	1.61828	2.94635e-05	0.000516596	10.4992	8.88089	10.8204	11.3154	10.5849	10.4286	10.6814	9.86916	10.0397	9.41349	10.1231	10.6881	10.243	10.9209	10.0696	10.394	10.1979	12.0809	9.66144	9.47839	9.61934	10.9576	11.6105	8.8008	8.68423	8.26778	8.07172	9.49547	9.96537	11.7839
FBXO45	1.46711	9.43745e-05	0.00127242	7.95717	6.49006	8.14773	7.54137	7.89352	7.87525	7.14196	8.0829	7.2749	7.63571	9.11138	6.45893	9.29685	8.67147	8.36807	7.18317	7.54115	8.21226	8.31407	7.02667	7.61963	9.45831	7.69119	6.40073	6.19231	5.89149	6.05129	7.07927	7.32527	8.51133
FBXO46	0.825966	0.000716922	0.0057717	8.32712	7.50116	9.07309	8.26009	8.57719	7.89048	8.44408	7.65506	7.6843	7.96818	9.03014	8.20468	8.62713	8.76771	8.50277	7.31162	8.004	9.14237	9.11702	8.00855	8.02203	8.09616	7.98773	7.43611	7.22089	7.29604	7.47053	7.65936	7.92401	8.8223
FBXO5	1.08545	0.000680334	0.00557612	7.61385	6.52841	7.40149	7.5042	7.83045	8.2066	6.43797	7.62699	7.4602	7.60198	6.64851	6.91896	8.41886	8.05426	7.96164	7.37635	7.54238	7.68353	7.87525	8.66332	6.2931	7.01875	8.83161	6.2434	6.37605	5.99564	6.3002	7.34065	6.91451	8.14838
FBXO6	1.76419	0.000458021	0.00414702	7.29725	5.53306	7.97751	7.61472	8.71119	7.08603	8.6557	6.6284	8.49751	5.19395	7.32431	6.07451	7.61483	7.72688	7.94668	7.56711	6.51579	6.91614	4.93787	8.01309	6.34453	7.41366	9.23224	5.66549	5.77788	4.99304	4.83504	6.3293	5.59762	6.54685
FBXW5	0.721397	0.00431387	0.021081	7.89199	7.1706	8.11867	7.98753	8.44618	7.82477	8.43146	8.42293	7.94092	6.78461	7.65372	7.52889	7.90394	7.74966	8.18674	8.29652	7.53621	8.32229	6.9129	7.76846	7.39641	8.02303	8.94675	6.69916	6.9734	7.0417	6.66367	7.70838	7.93727	7.44125
FCF1	0.722764	0.00919703	0.0355197	8.51929	7.79653	8.52599	9.49781	8.17063	8.79184	8.40729	7.15415	8.95369	7.83027	8.44325	8.31539	8.90211	8.60391	8.71924	8.46166	8.5094	8.94274	8.26054	8.35817	7.97063	8.73787	8.93149	7.57764	7.77444	6.73412	7.07994	8.72395	8.88907	8.93631
FCHO1	0.739313	0.00672542	0.0287044	6.64556	5.90624	6.85388	7.22723	7.19633	6.92478	6.20296	6.0001	6.76556	5.90747	6.46745	5.92182	7.09149	7.20757	7.35363	7.5526	5.98992	7.01833	6.04237	5.91654	6.16714	5.96143	7.79909	5.81465	5.83177	5.57446	5.71159	6.37248	6.13251	6.63452
FDFT1	0.893196	0.00759177	0.0312578	9.85298	8.95978	10.8595	10.3969	9.34831	9.44876	9.763	9.0942	9.9895	9.1708	8.8761	10.2044	8.79779	9.4191	11.7213	9.95694	9.52397	9.80249	10.8699	9.40924	10.0501	9.8212	9.99145	8.21924	8.79184	8.57856	8.50973	9.93122	9.72809	10.2505
FDPS	1.63214	4.95236e-08	3.98928e-06	10.7485	9.11633	10.8677	10.1785	10.7618	10.8248	10.9109	10.4019	10.4092	10.2505	11.2144	10.5762	10.3423	10.5464	11.748	11.1595	10.8555	10.7767	11.4645	9.96207	10.7826	11.247	10.9898	8.89402	9.07196	8.49841	8.4655	10.0501	9.71804	10.1961
FDPSP5	0.690596	0.000247992	0.00263787	6.9102	6.2196	6.88022	6.3505	6.60572	6.73944	7.37687	6.71408	6.45937	6.58459	7.20663	7.09838	6.53145	6.74022	7.29976	6.96411	7.05316	6.74432	7.70684	6.42313	7.60113	7.09502	7.25215	6.19346	6.21939	5.97515	6.16732	6.52458	6.23771	6.59724
FDX1	0.843785	0.00595227	0.0264442	8.54203	7.69825	8.72708	9.15547	8.42494	8.6973	7.7139	8.44325	9.03014	7.75531	8.02432	8.70203	9.47227	9.36813	9.45083	8.96204	8.03489	8.88258	7.31378	8.40604	7.29629	8.76383	8.78157	7.20707	7.69092	7.10365	7.2007	8.50565	8.4815	8.51867
FDXACB1	0.666232	0.00189721	0.0117669	5.98383	5.31759	6.07782	5.87704	5.70905	6.21491	5.55646	5.49052	6.52658	5.93388	5.80157	5.44495	5.5776	6.77833	6.61931	6.56446	5.42742	6.31316	5.2838	5.5854	5.58028	6.39214	6.46855	5.36469	5.27654	5.1915	5.09532	5.38641	5.59109	6.42092
FEM1C	0.847705	0.00567875	0.0255717	7.96284	7.11513	8.56376	8.14137	9.10321	7.75901	7.31851	6.89378	8.31932	7.21381	7.84068	8.14617	7.04209	7.61107	7.69516	8.58847	7.90258	7.856	7.11145	8.01059	7.58706	8.84165	9.11702	6.70266	7.26599	6.46707	6.6812	7.85085	7.72305	8.51972
FEN1	2.50147	9.43663e-12	3.48242e-09	10.0834	7.58197	10.3724	9.92514	9.65506	10.1467	10.2853	9.65572	9.93492	10.4757	10.046	9.77799	10.5594	11.0098	10.7555	10.1452	9.16424	9.44562	9.88882	10.1487	9.47676	10.9665	9.83866	7.74132	7.31571	7.21934	6.7256	8.22734	8.26251	10.1616
FGF18	1.78884	4.07466e-05	0.000664966	7.63636	5.84752	7.28007	7.6108	8.48917	7.82221	6.59567	7.74243	9.15388	8.42322	7.61507	6.06425	7.79152	7.50772	8.71807	8.71476	8.30052	6.87333	8.28167	5.28192	7.19	7.87871	7.09748	5.51445	5.5633	5.69596	5.85995	6.6461	5.80535	7.56745
FGF3	0.59758	0.0231075	0.0663778	5.19777	4.60019	5.26784	5.61932	5.41776	5.20105	4.76172	4.43313	5.3293	5.7916	4.82503	4.38646	7.27606	5.22774	5.13031	5.63815	4.77267	5.24965	4.90178	5.42049	4.88699	4.98721	5.06741	4.14935	4.68072	4.29461	4.51052	4.94151	5.02442	4.75925
FH	1.46025	4.8073e-06	0.000128045	9.71545	8.2552	9.98838	9.80021	9.60338	9.67773	9.16258	9.10372	10.5622	8.68651	9.77584	9.94006	9.39273	10.0968	9.69761	9.93914	8.84969	9.85927	9.4298	9.8505	9.70273	10.718	10.1151	7.6821	7.91798	7.49893	7.71317	9.54195	9.17707	9.78802
FIBP	1.45655	2.07446e-06	6.71339e-05	8.932	7.47544	9.32049	9.88175	9.13203	8.90681	8.57158	8.27195	8.80207	9.03988	8.95832	8.13739	8.76071	8.89454	9.99499	9.21088	7.94021	9.50856	8.69114	8.72069	7.99009	9.677	9.39388	7.31804	7.61707	6.94169	6.99981	7.88656	8.08949	8.69893
FIGNL1	0.804456	0.00226716	0.0134246	7.6834	6.87894	8.04975	7.87646	7.7224	8.30294	6.9348	7.79623	7.84475	7.10177	6.98167	7.18249	8.44292	7.9918	7.46685	7.59502	7.11172	8.44133	7.64834	7.64009	6.73853	7.7607	7.69308	6.50894	6.78405	6.2699	6.5828	7.63902	7.48896	8.71119
FKBP10	0.659937	0.025042	0.0702953	7.43506	6.77512	7.16595	7.75701	8.40008	7.95005	7.04846	6.61931	7.68869	6.89907	6.89643	6.9266	9.01873	8.18112	7.46495	7.53307	6.38665	7.85966	7.40925	6.48303	7.37577	6.72175	7.98946	6.12867	6.83458	6.78433	6.55341	7.32058	7.02918	7.79623
FKBP1A	0.849124	0.008729	0.0343622	8.2571	7.40798	7.9918	8.54151	8.26473	8.83446	7.42714	6.90706	8.30151	8.38594	8.38874	6.95359	8.85979	8.6027	9.0736	8.84757	8.34278	9.23476	7.13979	7.85308	7.68295	8.94618	8.7704	6.63675	7.09595	7.29702	6.97806	8.34916	8.09092	8.30611
FKBP2	0.839484	0.00576778	0.0258512	7.77222	6.93273	8.05936	8.2034	7.61914	7.95156	7.22398	7.17902	8.13127	8.19903	7.25717	7.04915	9.33156	7.36552	8.12687	8.79607	6.94431	7.78301	6.96114	7.45004	7.05502	8.26054	8.21551	6.28832	6.71737	6.51261	6.60434	7.62986	7.8439	7.82611
FKBP3	1.01226	0.000230793	0.00249787	9.5451	8.53285	9.94006	9.39097	8.85301	9.78461	9.22405	8.69977	9.12731	9.66701	10.2639	9.14113	9.57877	10.6445	9.83766	10.0559	9.42436	9.10707	8.88075	9.09092	9.43061	9.78224	10.1467	7.83348	8.46302	8.07172	8.20762	9.2495	9.37175	9.92104
FKBP4	1.80752	9.25838e-08	6.19391e-06	9.45988	7.65236	8.10247	10.3237	9.85558	9.82891	9.54735	9.57608	9.12118	9.79103	8.94775	9.02239	10.5432	9.07404	9.48029	9.79637	10.3488	8.27163	9.87647	9.53421	9.33659	9.98508	8.86214	7.55697	7.697	7.66609	7.58294	7.56775	7.84341	8.89213
FKBPL	1.11689	4.19094e-07	1.97709e-05	7.36296	6.24607	8.02819	6.88498	7.68182	7.89019	7.08885	6.83906	7.08865	7.13891	7.58487	7.36737	7.62519	6.78943	7.4806	7.32748	7.42201	7.55078	7.44233	7.47544	6.91134	7.35363	7.68652	6.36811	5.86093	5.80734	5.821	6.69234	6.92669	7.32748
FLJ23867	1.45524	0.000440701	0.00403814	7.55745	6.10221	8.05577	7.96001	8.11421	7.76362	6.78893	6.41886	7.75452	5.78395	7.47053	7.83822	6.99503	8.21195	8.12558	7.8685	5.98378	9.04654	8.25997	7.26474	6.56279	7.65207	7.64368	5.05139	5.51148	6.25391	5.90155	6.62722	7.26771	8.70056
FLJ37453	0.622717	0.0233319	0.0668378	6.85036	6.22765	6.71431	6.65196	7.09312	6.78433	5.67998	6.8831	6.9129	6.42267	6.35285	6.36444	7.60036	6.94146	7.76303	6.82982	7.25303	7.88685	6.64415	6.16307	6.17149	7.76967	6.7664	5.79635	6.15312	5.70336	5.66571	6.98955	7.05778	7.05902
FLJ41455	2.81098	1.04593e-05	0.000233244	6.61824	3.80726	6.64255	5.1509	6.84119	5.01086	6.80333	8.23249	4.84884	5.66692	9.17461	4.79203	7.18676	5.53891	6.66032	7.08018	6.60958	7.89048	6.39918	5.01871	8.09348	8.24358	6.24726	3.01888	2.77328	3.49727	4.09726	5.39265	4.06424	7.4692
FLJ42351	1.01749	6.24473e-05	0.000924797	6.10595	5.08846	6.1982	6.1849	6.75368	6.80582	5.54622	5.58114	6.50885	5.77037	6.06645	5.31688	6.58042	6.13863	7.20986	6.39178	5.76492	5.85608	5.53172	5.75291	5.41098	6.84956	6.26879	5.3151	5.0729	4.90508	4.83716	5.41002	4.99051	5.84273
FLOT1	0.748085	0.00328089	0.0174655	10.2231	9.47506	10.1269	9.08045	10.4197	10.8583	10.566	10.2325	9.61693	9.66011	10.2959	10.2299	10.7273	10.446	10.4146	10.718	10.6424	11.2432	10.4103	10.3085	10.1943	9.99399	9.77488	9.42929	9.61693	9.80478	9.86463	8.92766	9.20706	8.94917
FMNL2	0.743529	0.0103876	0.0386263	9.19902	8.45549	9.51626	8.44325	8.72797	9.56527	8.95073	9.86089	9.22405	8.7105	10.3203	8.59959	9.40924	8.56705	9.4549	9.46035	9.98	9.36747	9.08559	8.57421	8.34278	9.2678	8.92587	8.62713	8.00488	7.99725	7.48941	8.98124	9.63304	10.0244
FMR1	0.607417	0.0456877	0.107188	9.88235	9.27494	10.4748	9.85786	10.2894	9.0488	10.9503	10.2025	10.2781	8.53527	9.55127	9.79031	8.94882	10.7645	9.09812	9.92964	10.7283	9.53554	9.10948	9.80081	9.35231	10.798	10.1864	8.66116	9.0811	8.76771	9.32238	9.95869	9.85858	10.1812
FNBP1L	1.5109	4.41049e-06	0.000120133	10.6929	9.18198	11.1779	10.5634	10.0365	10.7645	10.5839	10.1006	10.3114	10.9109	10.3237	9.86541	11.0759	10.5989	10.6659	10.5693	11.3029	11.285	11.3788	9.86197	10.7502	10.8263	10.3467	7.84698	8.8282	9.15605	9.16573	9.86152	10.2334	11.9434
FNDC3B	0.651831	0.0368349	0.0924814	9.02221	8.37038	8.41222	8.84399	9.11458	9.72218	8.46582	8.85553	9.15446	7.60521	9.62584	9.10076	10.326	9.89123	8.47157	7.71338	8.82286	8.98494	8.7155	9.15338	8.71515	9.21907	9.62769	7.70303	8.04351	7.90946	8.27645	9.1329	9.15695	9.9473
FNTA	0.892606	0.0060264	0.0266391	10.112	9.21938	9.80835	10.6402	10.2173	10.4748	9.67561	8.76804	10.6076	8.80764	11.4802	9.72429	10.8572	10.5922	10.3952	10.6099	9.4556	9.5177	10.2488	9.60421	10.2883	10.0373	10.2164	8.95423	9.33563	8.37356	8.42654	10.2271	9.99924	10.4369
FOLR1	3.61119	6.68181e-06	0.000165813	10.3508	6.73957	11.122	12.0269	8.63003	9.98693	9.76003	8.26054	11.8151	9.81154	12.3498	11.2989	7.50772	10.477	11.8549	9.11458	10.4115	11.1647	10.8028	6.04222	10.5748	11.2836	11.4831	7.06578	7.04581	7.03798	7.79909	5.3038	6.18496	11.9381
FOLR3	1.1228	0.00651682	0.0281012	5.99216	4.86936	6.18072	6.9392	6.09879	5.82896	4.66953	5.08639	7.78023	4.81866	6.46995	6.65388	5.03116	6.95403	6.96453	5.45751	5.0806	6.26096	5.21535	5.76378	4.57756	7.82412	6.40667	4.60339	4.73337	4.61809	4.76712	5.28727	5.20693	5.76492
FOPNL	0.721095	0.0156658	0.0510879	9.56198	8.84088	9.90055	9.79266	9.20929	9.44294	9.32422	9.48288	9.29494	8.94882	9.22346	8.3694	10.4263	10.0228	10.046	9.40409	9.60872	10.0948	8.44355	9.37374	9.67504	10.2418	9.4503	8.30642	8.81646	8.08433	8.09031	9.95512	9.79266	10.5873
FOXA3	0.669032	0.00432816	0.0211368	6.02429	5.35526	6.43341	6.71765	6.72757	5.96067	5.07636	5.75092	6.02421	5.76897	6.78943	5.17292	5.90122	5.94255	6.11497	6.13135	5.39436	6.2626	6.21705	5.93711	5.50549	6.17149	6.5069	5.11149	4.94775	4.98585	5.05559	6.04354	5.98732	6.02726
FOXJ1	1.89961	1.92889e-05	0.000369623	7.23482	5.3352	6.26704	7.35885	5.92711	7.07134	9.09654	6.89826	7.45566	7.63466	7.59431	6.66954	8.43683	7.93516	8.05203	6.55237	8.17925	6.50061	6.93536	4.89689	7.56522	6.94951	7.33704	5.16088	5.02754	5.42273	5.41274	4.94357	6.04375	7.8524
FOXK2	0.877491	1.46905e-05	0.000303526	7.23512	6.35762	7.49158	6.821	7.38597	7.60416	6.82433	7.2143	7.49519	7.10393	7.51333	6.97806	7.50618	7.29873	7.1449	7.03268	7.35925	7.3531	6.70779	7.26323	6.47502	7.9254	7.89515	6.09523	6.12225	6.34788	6.13723	6.57194	6.87121	6.77924
FOXM1	1.99478	5.94327e-07	2.57055e-05	7.01995	5.02517	6.55502	7.01281	8.44931	7.87385	6.72352	6.72121	6.35146	7.03	5.99766	6.20974	8.42816	6.86682	7.0061	6.65446	7.21157	6.37345	7.22156	8.52227	6.23362	7.89382	7.09491	5.21493	4.80472	5.10359	4.79472	4.91703	5.31605	6.00761
FOXN2	0.89918	0.00233182	0.0137187	8.52746	7.62828	8.41095	9.26696	8.35049	8.44459	8.76804	7.10419	8.47984	8.45763	7.77941	8.98192	8.59145	9.15605	8.14838	8.08407	7.93417	8.75673	9.25986	9.53134	8.40473	7.95316	8.74257	8.49714	6.97374	6.73612	7.27402	8.11134	8.17733	8.99758
FOXQ1	3.5589	5.24327e-08	4.13676e-06	10.5185	6.95957	10.7893	11.7291	10.8624	10.5214	10.8147	11.2249	10.7298	10.6623	10.5129	11.5259	8.06422	10.8013	11.6664	10.2488	9.31812	12.5432	7.92973	9.29848	9.73256	12.6349	9.52768	6.5405	6.76791	7.95156	6.85285	6.70542	6.9392	10.2683
FOXRED1	1.44324	5.91578e-05	0.000895192	8.47566	7.03241	9.16508	8.36386	8.25351	8.53408	8.40029	7.72647	8.6343	7.86756	7.94268	7.89853	8.82505	9.0141	9.84669	9.10424	6.93006	8.21963	7.71358	8.26116	8.36131	9.76061	8.81193	6.38198	7.1315	6.91519	6.21541	8.19131	7.35907	8.82972
FPGS	0.608747	0.00505791	0.023656	7.79334	7.1846	8.14167	7.76189	7.81374	7.66098	7.91964	7.92613	7.59551	7.61707	7.81394	7.79189	7.61863	8.91373	8.44027	7.75092	7.93448	8.1048	7.75689	7.68093	7.47573	7.15331	7.27835	8.19565	6.78615	6.58967	6.67724	7.43641	7.42245	7.30302
FRAT1	0.821373	0.00442951	0.0214452	6.93007	6.10869	6.53788	6.61756	7.82349	6.94014	6.26658	6.55966	7.25521	6.97439	7.62783	6.92825	6.83579	7.08191	6.7722	7.80646	6.30028	7.44309	6.56529	6.46419	5.79226	7.70589	7.66864	5.97353	5.64288	5.59062	5.47009	6.90925	7.06578	6.49443
FRAT2	1.67033	9.15389e-07	3.56192e-05	8.22233	6.552	8.63333	8.93183	8.23016	7.82733	7.44261	7.60798	8.15979	8.6822	8.49124	8.22906	8.46959	8.07474	7.93845	7.61003	8.29241	9.06589	8.70961	7.08114	7.61224	8.97428	9.04038	6.43928	6.0062	5.98447	5.94907	7.42163	7.51135	7.78703
FSD1L	0.98867	0.00731596	0.0304455	5.94948	4.96081	6.41929	5.80317	6.36862	5.97495	5.45652	5.32119	5.84721	5.02519	5.26892	5.14824	6.01933	5.69738	6.75728	7.83482	6.28764	5.61202	6.64086	5.50181	4.61309	7.42527	4.95218	4.75492	4.58342	4.4661	4.93551	5.93154	5.09335	6.91349
FTH1P5	0.598547	0.00192939	0.011902	13.9437	13.3452	13.4965	13.5083	13.7075	13.9154	13.9982	14.5292	14.5292	13.5366	14.1353	14.2471	13.763	14.03	14.0888	14.1087	14.0714	14.2197	13.1554	14.1353	13.9154	13.9982	13.9305	13.9734	13.5083	12.8869	12.5311	13.5516	13.6196	13.7416
FTSJ2	0.812304	0.00141109	0.00953762	8.56472	7.75242	8.13425	9.24706	8.97183	9.05724	8.77948	7.44411	7.95226	8.79344	8.51898	8.11068	9.2927	9.32238	8.59113	8.60033	8.01271	9.0228	8.0714	8.47078	8.46991	8.342	8.79184	8.35944	7.99453	6.99383	7.03268	7.98326	8.15076	8.42654
FUNDC1	0.691381	0.011163	0.0407462	9.95548	9.2641	10.9371	9.80249	9.79172	9.26431	9.9328	9.77002	10.3701	9.6572	10.3122	9.8311	10.5839	10.1045	10.0634	11.0426	9.11458	10.0047	9.30626	8.82421	9.56155	10.1158	10.2788	9.15388	9.36235	8.51343	8.63065	9.86089	10.0634	10.3514
FUOM	0.899103	0.00269019	0.0152063	7.18635	6.28724	8.01164	8.3416	7.25239	7.24541	8.3549	6.28981	6.34514	7.44213	7.12517	6.93766	6.65534	7.00941	7.35603	7.44532	7.4944	7.34451	6.90579	7.05708	5.57066	7.62046	7.29207	6.80403	6.14434	5.88641	5.59209	6.51199	6.78461	7.00273
FUS	0.904244	0.00266092	0.0150586	8.89967	7.99543	8.75344	9.12344	8.31156	9.2979	9.61803	7.93004	8.6332	9.32585	8.65022	9.31088	8.53321	9.21907	8.75581	8.80026	8.3067	8.59835	9.95512	7.59871	10.1072	8.88801	8.99811	8.24738	7.89515	7.13891	7.32322	8.48334	8.88458	9.07766
FUT8	1.90243	0.000135942	0.00167044	8.17282	6.27039	10.0373	7.95879	8.86783	9.33809	9.41281	7.22015	7.75119	7.17058	8.12823	6.81441	7.14713	8.08193	8.87993	7.0936	8.31773	8.88505	8.58349	7.10491	7.27768	6.54285	9.92787	5.60405	6.13818	5.82291	6.03542	7.12032	6.90144	9.26041
FXR1	0.625659	0.0105227	0.0389579	9.7257	9.10004	10.0759	9.60986	9.78802	9.70491	9.03014	9.54555	9.18841	9.55545	10.7138	9.35986	10.3237	10.0902	9.79877	9.53482	9.83535	8.85704	10.2749	8.34337	9.58329	10.0779	10.2513	8.9665	8.91373	9.08764	9.0668	9.39097	9.17461	10.4229
FYTTD1	0.787042	0.0230075	0.0662154	9.43049	8.64345	9.31587	9.7593	9.68236	9.35319	8.14629	9.76244	8.69033	8.7475	11.0342	8.2935	11.0132	9.83619	10.045	9.27769	8.28236	9.44169	8.89752	9.31587	9.29046	10.2061	8.94426	8.57501	8.92815	7.71797	8.56426	9.09761	8.97766	10.1354
FZD10	3.85624	1.02859e-05	0.000230276	8.84789	4.99164	7.75038	8.25351	8.69893	11.368	9.12461	10.1317	8.68028	8.42529	5.68065	9.40359	8.71672	9.40359	9.73525	11.9232	7.91168	3.87462	8.07526	8.1048	10.3229	8.65333	9.08951	5.03051	5.19395	5.35956	4.63288	3.39541	6.33756	11.3257
FZD2	1.39017	0.0172656	0.0543082	7.26739	5.87721	8.25218	6.60434	9.7593	9.52089	6.10167	5.77698	6.61569	8.44076	6.57585	5.91129	9.6074	7.44309	6.22455	6.58184	6.08087	6.08155	8.55471	6.98765	6.12534	5.81098	9.38848	5.47785	5.60606	5.75206	5.8223	6.51579	6.08922	7.43713
FZD5	1.70513	0.000382105	0.00364909	7.98987	6.28475	8.86254	6.36762	8.12558	8.22342	8.49224	7.2416	7.69055	7.05178	8.10575	6.59158	10.1893	8.13972	8.01271	9.24011	8.82075	7.13252	9.30332	7.00377	9.81672	6.88683	7.48841	5.96335	6.29137	6.11406	6.07911	6.60695	6.65363	6.99029
FZD6	0.65872	0.027878	0.0758712	8.97881	8.32009	7.98485	9.38231	8.32111	8.80477	9.04168	9.16034	9.55062	8.05806	9.2383	8.46892	9.00134	9.25699	9.67034	9.25314	9.02239	8.66818	9.01961	9.20081	9.81885	8.79216	7.42388	7.60732	7.93727	8.15359	8.58349	9.12461	8.51426	10.3952
G2E3	0.606257	0.00782416	0.0319046	7.44231	6.83606	7.4377	7.84574	6.94225	7.04927	6.96138	7.29459	7.18617	7.20961	7.76161	7.31712	8.22101	8.56313	8.02867	6.89341	6.82564	7.75934	7.46978	6.74897	7.06823	7.45779	7.7213	6.4428	6.53321	6.6732	6.90706	7.37817	7.08191	7.96818
G3BP1	0.949269	0.000363481	0.00352396	9.11189	8.16262	8.82776	9.65506	9.16317	9.20475	9.18392	8.88075	9.45251	8.57057	9.40718	9.35602	9.17357	9.10585	9.52228	9.55238	8.2489	8.42293	8.63844	8.48579	8.50817	9.75828	9.59236	7.95539	7.93906	7.47874	7.55175	8.98919	9.0616	9.75095
GAB2	1.05395	0.0274403	0.0750279	10.0877	9.03377	10.4229	10.2102	9.13602	10.4658	10.4506	9.32261	10.9094	8.33472	11.2249	11.4249	9.51169	9.6343	11.2595	8.91519	10.2505	10.3763	10.2683	7.81499	8.77796	11.766	10.1641	9.87765	9.00068	7.96377	8.03689	9.12834	10.1953	11.2889
GADD45GIP1	0.792907	0.00915231	0.0353964	7.21042	6.41751	7.40707	7.19972	7.54816	7.81414	6.1891	6.20559	7.13581	6.92669	6.9302	5.9901	7.8077	8.12627	7.62346	7.51108	6.58684	8.0345	6.56355	7.767	6.69426	7.17974	8.17319	5.84315	6.46028	5.93526	5.98136	7.08523	7.1998	7.21504
GAK	0.895148	0.00156702	0.0102468	10.0422	9.14707	10.1238	9.0228	10.0002	9.62648	9.98433	10.0508	9.39484	10.1387	9.61412	10.2913	10.5503	9.51318	10.2666	9.83766	10.2773	11.2126	8.9473	10.6113	9.72069	10.9803	10.3514	8.77154	8.59083	8.86533	8.90164	9.62521	10.1279	10.4128
GALM	0.952681	0.0191015	0.0580865	8.8709	7.91822	9.28271	9.50245	8.42612	9.59972	10.1436	6.8128	8.12283	8.45249	9.05573	9.21805	9.34166	10.16	8.87885	9.07516	7.7139	9.66346	8.89402	8.08262	7.7298	7.84297	9.94006	8.61835	7.68034	7.36371	6.72155	8.21161	8.91373	9.22078
GALNT2	1.32931	0.000149378	0.00179787	8.59058	7.26127	8.35944	8.86169	8.95517	9.60492	8.11566	8.22382	8.25714	8.52293	7.96818	7.08362	9.89689	8.5094	8.09654	9.28318	7.57446	9.28997	8.61985	8.30937	8.40688	9.28427	8.80604	7.03774	7.25809	6.50505	6.46855	7.86598	8.43223	8.96347
GALNT3	2.43623	4.36769e-08	3.56903e-06	10.0275	7.59129	9.62648	9.76003	9.61044	9.68845	9.68845	10.2532	10.297	8.42113	8.9254	10.2399	10.2164	10.2759	9.85345	9.53749	10.1792	11.2206	9.98838	10.7427	9.66471	10.9209	10.5693	6.21217	6.98459	7.54521	7.64728	7.78473	9.37374	10.9258
GALNT4	1.02276	0.0109428	0.0401753	8.11582	7.09305	8.24015	8.05936	7.64957	7.72278	9.11458	7.47053	8.68869	7.10811	8.01739	7.23789	9.98362	8.37744	8.42612	7.33307	7.14427	9.27403	7.34814	6.76781	9.89555	7.1606	8.85106	7.08625	6.81038	7.52297	6.39533	7.47544	7.26795	8.67717
GALNT6	1.65789	1.92309e-06	6.34074e-05	7.35874	5.70085	7.37251	6.44248	8.55865	7.77598	8.21027	7.52775	7.57953	7.21204	7.1952	5.59903	7.34112	7.88597	7.9816	8.21027	6.7635	6.81989	7.1657	7.05974	7.40027	6.52311	8.06279	5.70769	5.38925	6.1072	5.44138	5.80553	5.75406	7.20497
GALNT7	0.965946	0.01849	0.0568082	8.35499	7.38905	7.55835	8.62223	8.78112	9.18392	8.10895	8.48388	8.36169	7.48841	5.76604	7.31454	10.0133	8.35628	8.49476	8.73137	8.12766	10.1006	8.66818	7.66806	8.34318	8.32014	9.1454	6.97964	6.85398	6.82139	7.12347	8.3729	8.1829	8.17175
GAPDH	0.924977	1.7522e-07	1.01752e-05	13.6091	12.6841	13.442	13.8273	13.9305	13.8631	13.6351	13.7903	13.0326	13.5184	13.4543	13.8956	14.03	13.5285	13.7075	13.5854	13.8045	13.0162	13.6783	13.5619	13.9305	13.5366	13.4543	13.1768	12.6349	12.5229	12.3235	12.7045	12.742	13.1768
GAPDHP73	0.761762	0.023947	0.0680208	8.1723	7.41054	7.82611	8.98212	7.94331	7.9592	8.6419	9.02546	6.93426	8.99357	8.59195	8.73505	8.26931	7.51823	8.13315	7.76422	9.39876	7.01698	9.20445	7.44261	8.79779	7.59561	8.07833	7.93516	7.68081	7.93906	7.47679	6.72896	6.70244	6.9382
GAR1	0.592774	0.0194963	0.0589034	9.62156	9.02878	9.78708	9.02185	9.763	10.0047	10.4726	8.33969	9.44969	10.5419	9.47431	9.28911	9.86625	9.72555	9.59321	10.0236	9.20987	10.0107	9.71233	8.49004	9.74604	10.0397	9.86541	8.68365	9.24606	8.54477	8.57237	9.53803	9.58783	9.24753
GARS	0.888534	0.00160275	0.0104149	10.1136	9.22505	9.91922	9.84332	10.0567	10.5048	9.63613	10.5313	10.0893	9.91517	10.3326	10.4069	10.446	10.1532	10.0405	10.0034	10.3685	11.4764	9.46671	10.1532	8.89311	9.51852	11.1043	9.08045	8.93106	8.58059	8.72954	10.0673	9.96131	9.63986
GAS2L3	1.9043	1.15723e-05	0.000250274	7.38089	5.47659	8.30151	6.6514	7.17763	7.75497	6.318	8.15247	7.79054	8.53884	5.95037	6.49207	8.02867	7.89853	8.25218	6.41482	6.18243	7.19418	7.04904	8.30865	6.09061	7.30433	8.37356	6.34689	5.09805	5.58861	5.16421	5.77449	4.88728	8.15475
GATA3	0.663581	0.00176622	0.0111818	6.42345	5.75987	6.11322	6.56745	6.12167	6.37545	6.67654	6.19274	6.23805	5.93467	6.48432	6.67337	5.7319	6.36878	5.93565	6.00664	6.75914	6.6369	6.33779	8.00048	6.41074	6.83842	6.37685	6.11149	5.84175	5.63488	5.63263	5.71333	5.62512	6.53508
GATC	1.16929	0.000123242	0.00156245	10.7548	9.58551	10.8635	11.0426	10.2349	10.9651	11.1054	10.9695	10.1045	11.359	10.3585	10.0107	11.1332	11.2989	10.7571	10.7362	10.4922	10.3411	11.5657	10.725	11.766	9.34463	10.7926	9.45415	9.76477	8.88505	8.70239	10.1928	10.5139	10.6391
GBA	0.595399	0.0250917	0.0703898	6.96146	6.36606	6.83669	6.69496	7.2204	7.49467	6.16982	6.42238	7.45898	6.2652	6.37226	6.75997	7.24105	6.95852	7.42607	7.75701	6.38014	7.86418	6.32115	7.09838	6.6568	7.67015	7.26507	6.5951	5.70547	5.65682	5.92043	7.03945	7.2791	6.81825
GCAT	0.717773	9.725e-05	0.00130168	7.86562	7.14785	8.6968	7.62472	8.07833	7.66832	7.56166	7.5824	7.83323	7.789	8.15359	7.47429	7.98121	7.55903	8.52262	8.1063	8.02203	8.43294	7.70709	7.53251	7.31222	7.90873	7.67343	6.70458	7.24357	7.14909	7.08575	7.31545	7.38866	7.82326
GCH1	1.23853	0.00615076	0.0269752	8.9365	7.69797	9.99145	8.54075	9.91797	9.46132	9.24792	6.57346	8.99166	8.7332	9.74976	7.95389	9.55385	8.59333	8.43447	9.6112	8.20549	9.78402	8.04064	9.55004	6.91396	9.64535	10.3131	8.34098	7.7045	7.13473	6.45916	8.74831	7.80015	8.79607
GCNT2	1.41274	0.000477707	0.00428148	7.2381	5.82536	7.44856	6.83326	7.52911	8.47665	6.92979	7.36826	7.69308	7.41018	7.04292	6.35138	6.66273	8.63114	5.72891	5.85014	5.91519	8.31972	7.45725	7.94211	7.93845	6.8213	6.79509	5.73914	5.05308	6.05705	5.28116	7.06692	5.75481	8.09306
GCSH	1.15072	0.00152564	0.0100567	10.5612	9.41045	10.0567	11.0454	10.1006	10.6549	10.1317	10.0595	9.78294	9.87042	10.6872	9.76354	10.0357	11.5781	11.5144	11.0819	10.1289	9.76825	10.7545	10.7062	11.1507	11.3056	9.99677	8.40688	9.75095	8.69033	8.85885	10.7873	9.96836	12.1718
GDF15	0.725842	0.0210197	0.0619276	5.85082	5.12498	5.48237	5.50887	7.16245	5.26385	5.18253	5.50134	6.38978	5.37287	5.13905	5.23108	6.2804	6.51167	5.31688	6.84643	5.93188	7.52241	5.08444	6.80901	5.22881	5.33921	6.13085	5.16749	5.16088	5.41352	5.19218	4.96408	4.85171	5.48183
GDI2	0.628646	0.00238314	0.013956	11.1728	10.5442	11.0803	11.5873	10.673	11.7327	11.3322	10.2651	11.3274	10.6524	10.9727	11.5569	11.122	10.6992	11.3172	10.8852	11.4573	11.0372	11.5781	11.3381	11.7907	11.1816	11.4704	10.7062	10.5447	10.1127	9.92402	10.8442	11.1332	10.745
GEMIN4	0.692815	0.00752487	0.0310774	7.8875	7.19469	8.28083	7.44261	7.27835	7.42555	7.17563	7.95104	8.45959	7.72711	7.98609	8.19201	7.91703	7.87234	8.19772	7.70795	7.40275	7.7076	7.68182	7.88223	7.85391	7.99652	9.71355	6.64499	7.21962	6.82781	6.67788	7.93816	7.85966	7.67279
GEMIN6	1.268	1.78167e-07	1.02941e-05	8.0734	6.8054	8.6123	7.69964	8.23361	8.30611	8.09748	7.45359	7.84914	8.56736	8.44355	7.41219	8.09306	8.26372	8.49945	8.2525	8.15509	7.92475	8.20115	8.15359	7.86756	7.34943	8.53408	6.37332	6.54496	6.48136	6.56187	7.43737	7.43354	7.64552
GEN1	1.68879	3.39762e-06	9.84019e-05	6.0505	4.36171	6.38022	6.06703	6.35598	6.54947	5.72081	5.26593	6.47007	5.69352	5.13366	5.62055	5.7986	7.18157	5.55166	5.59056	5.13439	6.68653	6.22863	6.18818	5.56292	5.72992	7.07307	4.25115	3.33225	4.15427	4.34031	5.79838	4.29392	7.12784
GFER	0.66592	0.005357	0.024542	6.61875	5.95283	7.16199	6.92068	6.85108	6.58164	6.44272	6.17996	6.79835	5.9715	6.23695	5.85734	6.97418	6.76201	6.85166	7.08353	5.81369	6.87432	5.86725	7.15805	5.89073	7.45611	7.19585	5.85813	5.8464	5.50927	5.63112	6.41342	6.45867	6.68303
GFM1	1.47068	2.52883e-07	1.34557e-05	8.87092	7.40024	8.99504	9.0736	8.55595	8.73549	8.3915	8.05779	8.59796	8.68295	9.76711	8.26291	8.78712	9.57608	9.12731	8.67402	8.64344	8.71476	9.17028	8.71388	8.72142	9.80615	8.53755	7.28246	7.28494	6.76701	6.96299	8.03199	8.07206	9.56791
GFM2	0.587178	0.0212823	0.0624682	7.29178	6.7046	7.86379	7.69369	6.76616	7.61953	6.64281	7.31132	7.15854	7.10728	7.05823	6.46986	7.74102	7.76338	6.87484	8.11895	7.41459	6.59998	7.00624	6.56745	7.16846	7.20366	7.76422	6.51618	6.72932	5.87998	6.68385	7.3455	7.07277	8.50516
GFPT1	1.59248	9.13575e-07	3.56192e-05	9.36746	7.77498	8.79038	9.55385	8.94386	9.36195	9.44969	9.56599	9.51036	8.21496	9.76003	9.79579	10.1207	9.45887	8.78336	9.64151	9.21907	10.4748	8.59304	9.52553	9.50048	8.74132	9.51696	7.26507	7.52073	7.14576	7.25416	8.85601	8.60816	9.56155
GGCT	1.3012	1.09964e-05	0.000240763	11.7111	10.4099	11.1911	12.4505	11.3154	11.5163	12.1968	12.4033	11.9666	10.8824	11.3788	12.3589	12.6411	11.852	10.5432	11.6187	11.9097	12.5927	11.2614	11.2595	11.6724	11.6724	11.9327	10.6859	10.1238	10.2883	10.0968	11.0407	10.2241	11.0289
GGCX	0.73259	0.0010041	0.00743485	7.9748	7.24221	7.95316	7.71544	7.95689	8.77523	7.41953	7.89782	7.68692	7.89853	8.28429	7.50739	8.49082	8.78157	7.54594	8.67232	8.46302	8.115	7.90563	7.68769	6.95381	7.53828	8.4235	7.38008	7.14399	7.50452	7.02155	7.23903	7.1641	7.77284
GGH	1.87766	0.000183066	0.00209532	8.86051	6.98285	8.88638	9.73617	9.01713	9.36154	6.29511	7.17488	9.63986	8.04789	8.90969	8.14222	6.773	10.1337	9.66144	8.60942	9.5775	9.27468	10.0337	8.99655	8.82869	8.96081	9.02761	7.28828	6.08861	6.39114	6.46812	8.37957	7.28138	9.84332
GGPS1	1.18969	0.000118826	0.00151801	9.20342	8.01373	8.89706	9.0027	8.99758	9.47598	8.81916	11.0153	9.29896	9.20081	8.87378	8.8751	8.70496	8.77523	9.19796	9.59472	9.26041	10.5524	8.60391	8.78559	9.46865	8.72708	9.31195	7.75497	8.06104	7.38527	7.33656	8.71632	8.8282	9.03581
GGT6	1.62381	0.000988846	0.00734629	7.27141	5.6476	7.07994	7.6773	8.28309	6.72096	6.0297	7.37943	9.14284	6.86273	7.47169	7.93933	9.00185	6.4696	5.77869	9.00366	6.09481	8.20468	6.57893	5.14783	6.37301	7.70868	7.75263	5.39125	5.43723	5.22075	5.23494	5.91281	6.68863	7.26973
GID8	0.797762	0.00244069	0.0141801	9.81798	9.02021	9.8526	9.95512	9.82809	9.89884	9.72138	8.95559	10.3122	10.3874	9.5395	9.09092	10.1113	9.90448	10.2565	10.0116	9.65813	9.41231	10.1812	9.26376	9.11547	10.5503	9.69298	8.24567	9.24792	8.34916	8.50671	9.47598	10.2959	10.2959
GINS1	2.73607	3.39943e-09	4.57524e-07	9.40876	6.67269	9.67431	9.12731	8.81433	9.77331	8.73988	7.6044	8.84121	10.3793	8.53246	8.89348	10.2532	10.2035	9.22021	9.50938	8.79144	8.45814	10.3229	10.0168	8.88988	10.0902	10.5648	6.46765	6.45033	7.41542	6.44375	6.73399	6.525	10.2922
GINS2	0.903298	0.00178912	0.0112676	6.9367	6.03341	6.97873	6.32779	6.99158	6.493	6.49694	6.58272	6.45438	7.10563	6.31742	6.71156	6.97909	7.15352	7.89978	6.42904	6.45506	6.27581	6.97789	8.62713	6.90267	8.33115	6.64431	5.76387	6.02041	6.4097	6.10948	5.90122	5.99576	7.47226
GIPC1	0.88596	0.0058608	0.0261649	9.98022	9.09426	9.49607	10.3318	11.0426	10.191	9.10473	10.1625	9.31024	9.88416	9.72371	9.97864	10.5398	10.884	9.40783	9.56656	9.62913	11.1206	9.26646	10.7029	9.65899	9.40359	11.2559	9.22254	9.1135	9.69434	9.60221	8.44292	8.49004	8.90367
GJA4	1.17583	0.030006	0.0797558	7.65597	6.48014	8.83293	10.9287	6.4652	9.14924	6.45384	6.5077	7.58294	6.55732	7.23572	8.13972	9.95694	8.12721	7.14399	9.49607	6.13417	6.84192	6.27345	7.53934	7.42422	6.84777	7.27088	6.50984	6.66162	6.93669	6.46129	5.98154	6.32985	7.52209
GJA5	1.17841	0.019018	0.0578941	5.83252	4.65411	4.93133	6.55985	4.84306	6.07001	7.80556	5.15458	7.04443	4.36774	4.49246	5.54438	7.48814	4.45155	7.00531	6.45175	4.66934	4.54063	5.60606	7.19381	5.48793	5.43052	8.09066	4.52739	4.2257	4.79189	4.37302	4.82536	5.18129	5.08627
GJA9	1.33125	3.61816e-05	0.000607362	7.05915	5.7279	6.91519	6.87484	8.55471	7.21242	5.96925	6.89622	6.53556	6.87	6.74945	6.42749	6.72053	8.42494	7.80678	7.41633	7.74302	7.1405	6.1186	6.56485	7.66068	7.14713	6.89866	5.49768	5.68509	5.4808	5.53204	6.29821	5.87361	6.65421
GJA9-MYCBP	1.04749	0.000251157	0.00265672	8.70903	7.66154	8.54814	8.70836	10.0658	8.48225	8.44883	8.69469	7.88164	8.80884	8.73596	8.4355	8.06345	9.69221	8.64793	8.82286	9.2495	8.92352	8.342	7.92344	9.68096	9.1454	8.17286	7.705	8.44394	7.27857	7.11217	7.61483	7.81473	8.12454
GJB1	1.5145	0.000829129	0.00642298	7.15804	5.64354	7.23851	6.28874	7.57514	7.11468	7.11396	7.17442	7.10539	5.66244	7.65069	5.78262	6.59899	7.57832	8.58075	9.87231	6.7153	7.95455	6.73832	5.59545	7.98529	6.43698	8.3234	5.62435	5.66571	5.4293	5.82649	5.5213	5.7941	6.39061
GLB1	0.8472	0.040148	0.0980843	9.85394	9.00674	9.31024	10.035	9.68325	11.2937	9.15211	10.099	10.9323	8.61464	8.84121	9.43576	9.80835	9.68719	11.0218	11.6257	9.2252	10.321	9.2356	9.64267	8.84865	10.1585	11.0274	9.3427	8.71672	8.00323	7.90394	9.90055	10.1733	8.78755
GLB1L2	1.04279	0.000888132	0.00677348	7.4684	6.42561	7.59734	8.25037	7.0067	6.50317	6.69822	7.7707	8.03926	7.39195	7.36371	6.65456	7.85632	7.55384	9.2495	7.74117	7.10021	7.36024	6.80901	6.80133	6.74849	7.79567	7.89095	5.58969	6.434	6.65959	6.29144	6.52931	7.04962	8.12208
GLCE	0.716326	0.0358323	0.0907509	6.8111	6.09478	5.98559	9.09867	6.54285	7.63541	6.31173	6.88964	7.86019	5.86544	5.80274	7.04915	7.06405	6.92586	6.36824	6.46644	6.55179	6.51421	6.45545	6.80154	5.83433	6.90176	7.18261	6.17454	5.78026	5.51558	5.71458	6.65149	6.73221	7.73655
GLDC	2.66689	0.000662616	0.00546133	8.03407	5.36718	9.30626	10.0667	5.81832	7.46534	8.37468	7.10621	9.90055	5.92518	9.85858	7.60259	6.72721	8.85704	6.92586	8.97481	5.79376	7.66021	9.21558	5.87812	5.30223	12.0738	9.63161	5.87729	5.36967	5.42543	5.25999	5.17309	5.09759	8.285
GLO1	0.87274	0.00116253	0.0082428	11.6889	10.8161	12.2792	10.7656	11.4907	12.0517	10.9455	12.1319	10.8688	11.6609	11.1473	11.6232	12.583	11.6664	11.3445	11.5239	12.4711	10.6504	12.2264	11.9728	12.2875	11.9931	11.3704	10.4	10.7298	10.6237	10.6048	11.188	11.3505	12.101
GLRX2	1.08002	0.000390333	0.00370574	8.02167	6.94165	8.16592	8.10118	7.83122	7.41842	7.21017	7.66641	8.32408	7.67555	7.76678	7.6752	7.45849	8.65022	9.73256	8.84969	7.08106	8.21298	7.57009	8.44745	7.34235	8.74952	8.54151	7.1884	6.8446	6.58554	6.40839	7.56745	7.05549	8.00589
GLRX3	0.792938	0.000250451	0.0026517	7.45654	6.6636	7.76338	7.93652	7.26123	7.5447	7.21504	6.42411	7.56975	7.7262	7.67015	6.73899	6.95403	7.83967	8.1166	7.70422	7.20534	7.52449	7.08165	8.09423	7.09542	7.46222	7.70684	6.43797	6.62658	6.53163	6.25624	7.20515	6.92401	7.40901
GLTP	1.19298	1.06839e-05	0.000235726	9.3429	8.14992	9.33194	9.63919	9.29748	9.56791	9.0595	10.0902	9.12461	9.31769	9.34774	9.10889	9.5395	10.3969	9.61354	9.64535	8.496	9.60787	8.65421	9.81885	8.9523	8.4434	8.90925	7.54038	8.06293	7.99576	7.70337	8.64705	8.95005	9.5815
GLUD1	0.6994	0.000598447	0.00506566	8.72834	8.02894	8.63885	9.46571	8.94336	8.19404	8.9385	8.9385	8.7497	8.48431	8.72462	9.38024	8.09558	8.98042	8.05035	8.13739	8.97721	8.88075	8.59145	8.65255	8.30478	9.2633	8.69513	8.47207	8.05908	7.51491	7.67164	8.20856	8.24738	8.93671
GMCL1	1.0578	3.29153e-05	0.000563278	7.65603	6.59823	7.44386	7.4516	7.50599	7.26219	6.92344	7.85966	7.57609	7.5735	7.71517	8.43146	8.35277	8.2489	7.36318	7.79536	7.85573	7.72688	7.77712	6.31983	7.27357	8.16198	7.64601	6.15628	6.42886	6.37941	6.33882	7.14647	7.13955	8.16839
GMDS	0.760344	0.00127105	0.0088126	7.31393	6.55359	8.63388	7.29051	6.83481	6.89189	7.03945	6.74269	7.39059	6.77391	7.90774	6.7256	7.4041	7.61679	6.98392	7.31429	7.3528	8.2596	7.30851	7.29765	6.77665	7.52691	7.85759	6.30396	6.78492	6.33081	6.35114	6.79581	6.7549	6.97667
GMEB2	0.784897	3.64607e-06	0.000103373	8.3112	7.5263	8.28908	8.26582	8.1872	8.37215	8.23938	7.63801	8.55037	8.11038	8.47441	8.36807	8.38546	8.71693	8.57535	8.43972	8.17063	8.31407	7.97206	8.05936	8.17286	8.53638	8.4881	7.04394	7.32666	7.34966	7.34582	7.92135	8.17037	8.52054
GMNN	1.31134	0.000153352	0.00183031	9.34756	8.03622	10.3784	8.14585	8.92636	10.2721	8.527	8.34762	8.65962	9.55998	8.90527	8.71226	10.3346	9.52717	9.30332	8.64738	9.70323	8.92886	10.8677	9.97579	9.40783	9.53554	9.60338	7.35091	7.79152	8.34669	7.90811	8.38516	8.43494	9.37709
GMPPA	0.713175	0.0242154	0.0685957	7.44606	6.73289	7.47053	7.49715	8.02903	7.97334	6.7621	6.8645	7.97751	6.82649	6.69025	6.56318	7.77231	7.54764	8.41121	7.82643	6.86313	8.51514	6.55466	8.86343	6.71786	7.62495	7.2362	6.66697	6.48765	6.28328	5.91654	7.53086	7.51203	7.22634
GMPR	1.33409	0.0136784	0.0466576	8.82057	7.48648	9.58965	7.86472	10.4206	9.75593	10.2072	8.23497	9.16884	9.31024	7.35466	8.47585	6.99709	8.47629	11.0567	8.82869	9.41231	8.87885	7.37741	6.27048	10.6752	8.137	9.48029	6.96667	7.28449	6.80162	7.1294	8.25089	8.48579	8.07948
GMPS	1.11374	8.98807e-07	3.53954e-05	8.80803	7.69429	8.91826	8.9101	9.07954	8.48769	8.38937	8.56035	8.40604	8.65255	10.014	8.74188	8.66781	9.11754	9.42929	8.85803	8.55768	8.58059	8.547	8.93085	8.59882	9.55831	8.52526	7.49467	7.856	7.50912	7.77231	7.77176	7.76189	8.24567
GNA13	0.982152	0.000115436	0.00147883	9.6775	8.69535	10.0204	9.23762	9.53554	10.059	8.91742	9.84992	10.2628	9.25063	9.66701	9.84511	9.92312	9.8042	9.49547	9.44237	10.2249	9.32476	9.62092	9.79877	8.69893	9.90055	10.183	8.77914	8.57158	7.80533	8.01704	9.36354	9.63545	9.84263
GNAI3	1.04197	1.11462e-05	0.000243112	10.044	9.00199	9.80249	10.0725	9.81672	10.4162	10.1096	8.8212	10.3931	10.0306	10.2675	10.3073	10.2061	9.86327	10.2018	9.75759	10.1864	10.137	10.2018	9.99924	9.97004	10.326	9.77948	9.1874	8.84682	8.21195	8.26291	9.80148	9.70139	10.3013
GNAS	1.13842	7.71841e-07	3.15352e-05	12.3372	11.1988	11.9728	11.7907	12.426	12.3621	12.1123	12.4816	12.2957	12.5366	12.1631	12.3266	12.6479	12.0547	12.4996	12.7552	12.1421	12.6683	12.6115	12.0403	12.0667	12.101	12.5768	10.6623	10.9143	10.738	10.7348	11.9381	12.2051	12.7865
GNG5	0.871434	0.0013988	0.00948001	11.5622	10.6908	11.7083	11.3461	11.5332	12.1968	10.8902	10.9839	11.1456	11.852	10.9548	10.7311	11.8452	11.5075	12.0437	11.3172	12.426	12.23	10.9355	12.2647	10.9156	12.1593	11.716	10.083	10.5785	10.2022	10.3388	11.4621	11.4802	11.6664
GNGT1	1.16455	0.00501251	0.0234917	4.54221	3.37766	3.8497	4.44044	4.77197	5.13551	3.36982	4.9982	4.60849	3.74167	3.72097	3.09146	5.30697	5.35706	4.03928	6.36444	3.54318	5.03758	3.47879	3.8577	4.39947	4.57388	5.77376	3.19664	3.42589	3.77409	3.50211	3.63099	2.73622	6.4683
GNL2	1.76088	3.47935e-08	2.99276e-06	10.2693	8.50838	9.96836	10.4069	9.92596	9.66408	10.8711	10.4855	10.2325	10.5594	10.5252	10.4139	9.25256	11.488	10.3784	9.88811	10.5882	10.8028	9.8835	9.55902	10.7736	10.2195	9.55502	8.71151	8.1705	7.85278	8.28167	9.39876	8.63504	10.4821
GNL3	1.93356	6.99999e-07	2.97142e-05	9.61538	7.68182	10.1033	9.91922	9.17461	9.40409	9.89406	9.28634	9.91857	9.4191	10.4602	9.28427	9.55502	10.045	10.229	9.82809	8.57719	10.8077	9.27202	8.48769	7.96849	9.54735	10.5345	6.91192	7.60521	7.21826	7.33839	8.81193	8.20524	9.82257
GNPNAT1	1.89679	1.32128e-07	8.10477e-06	9.14396	7.24717	9.48987	9.58207	9.22466	8.57461	9.93828	8.47517	8.92496	7.9995	8.27952	9.00234	9.07614	9.52228	9.97108	9.26952	8.63053	9.8212	8.44686	9.83226	8.53638	9.31435	9.99845	6.84731	7.01752	6.85024	6.637	7.82733	8.30361	9.25699
GNPTAB	0.682966	0.00753004	0.0310876	8.12299	7.44002	8.24779	8.50136	8.16479	8.73048	7.87551	7.96282	8.41222	8.01394	7.72738	7.86535	7.84655	9.24322	8.3709	7.4318	7.43289	8.6495	7.84137	8.17126	6.84119	7.80571	8.66332	7.70992	6.87519	7.16582	7.21135	8.04727	7.63058	8.90644
GOLGA3	0.808622	0.000276757	0.0028562	8.22727	7.41865	8.2618	8.23142	7.93358	8.49047	8.70879	8.13166	7.84297	8.00887	7.54347	7.9307	8.3988	9.15647	8.40085	7.90225	7.41483	8.34278	8.19444	8.61311	8.83067	8.25385	8.18112	7.10316	7.27835	7.01001	6.96453	8.05463	8.10118	8.22699
GOLGA4	0.906727	0.00295366	0.0161752	8.64632	7.73959	8.42158	8.48967	8.40543	9.16622	8.5307	9.78956	9.51988	7.54816	7.84324	8.52178	8.80381	8.52096	9.32876	9.44969	8.36726	9.43533	8.13593	7.6853	8.23123	8.92459	8.75581	7.70735	6.94394	7.07628	7.75003	8.81389	8.14606	8.34407
GOLGA5	0.737923	0.00417585	0.020609	9.37208	8.63415	8.92221	9.61462	9.64267	9.48828	9.64151	8.19858	9.00011	8.43294	8.62478	9.75208	10.0567	10.1096	9.25699	9.29231	9.677	10.0263	8.74188	9.16258	9.58047	9.84752	9.56285	8.47372	8.51133	7.95756	8.36169	9.23164	9.26899	9.55385
GOLGA6L4	0.688986	0.03467	0.0887121	7.82676	7.13777	7.22312	8.0714	8.10684	7.33198	8.03099	8.53714	8.42529	8.2066	7.64852	7.69092	8.37215	7.46685	7.59013	6.87556	6.5914	8.21496	6.90208	7.299	8.15911	7.72514	8.06438	6.36088	6.27478	6.90816	7.21527	8.24256	7.82497	9.65506
GOLGA7	0.840503	0.00523632	0.0241741	10.659	9.8185	10.4263	10.5612	11.4249	10.5464	10.243	9.26899	10.8624	9.36878	11.8481	10.4535	11.3029	11.2836	10.4953	10.6411	10.7488	10.3467	10.7645	10.2729	11.0018	10.8887	10.6579	9.69298	9.86768	8.92352	9.12883	10.6309	10.6671	11.0902
GOLPH3	1.40456	1.00011e-05	0.000225	11.3058	9.90128	10.6189	10.9175	11.3381	11.6747	11.2432	11.3931	10.9487	9.47839	11.5009	11.1627	11.7876	10.8711	11.852	11.9381	12.0667	12.0403	10.8392	11.4802	11.6451	11.4933	11.1172	9.70139	10.0968	9.34678	9.10795	10.4377	10.7171	11.3216
GOLT1B	1.46405	3.55132e-07	1.73955e-05	10.2283	8.76425	9.27769	9.89072	10.6337	10.8311	9.95212	10.7833	10.0716	10.0609	10.4748	9.66838	11.2806	10.1625	10.1995	10.0397	10.1184	10.1045	10.0244	10.8523	10.6659	10.1251	9.51914	8.64834	8.51394	8.08138	8.44973	9.62365	9.26844	10.2864
GORAB	0.79295	0.00279272	0.0156114	8.94643	8.15348	8.37062	8.66902	8.85653	9.20226	8.06209	8.56395	9.15165	7.94696	8.28613	9.14619	8.43122	8.40367	9.48368	9.27147	8.86745	9.44471	9.44338	9.27875	9.58839	9.62521	8.97937	8.21266	7.62141	7.6128	7.9303	9.02889	8.51481	9.74875
GORASP2	1.09384	0.000343294	0.00338122	10.601	9.50712	10.2922	11.0819	9.55385	10.8968	10.2082	9.90448	11.4234	9.39965	10.9298	10.3131	10.5882	11.2432	10.843	10.6859	10.6981	11.357	10.1574	10.7656	10.8711	10.7691	10.5989	8.9241	9.60492	8.73894	8.76183	10.322	10.6909	10.6402
GOT1	0.742109	0.000830256	0.00642852	7.96598	7.22387	8.76726	8.48116	8.05035	7.87056	7.58632	7.40514	7.88223	7.68149	7.83259	7.46898	8.21924	7.88943	8.07356	8.09066	7.98804	7.78501	7.45359	8.58897	7.37184	8.83352	8.61715	7.48814	7.15984	7.60821	7.29216	6.95757	6.83733	7.31454
GOT2	0.828757	0.011614	0.0417877	9.39623	8.56748	8.52526	10.3085	9.86152	9.61534	8.11319	8.65212	8.84682	8.36616	8.81193	8.9451	10.5419	8.98124	9.98771	9.85786	9.18323	9.82257	9.25143	10.4978	9.04424	10.4714	9.2735	7.76951	8.83774	8.26116	8.39054	8.80381	9.34211	9.75828
GPAA1	1.04764	0.00020222	0.0022636	9.51479	8.46715	8.84165	9.40125	9.35059	9.09982	9.31634	9.0786	10.5129	8.8751	9.7593	9.92964	9.51376	8.73988	10.1362	10.6368	10.1616	9.56527	9.11754	9.14333	8.6194	10.0938	10.1224	8.23272	8.44686	8.14521	8.25416	8.52543	9.19853	9.31024
GPAM	0.623922	0.0461556	0.107893	7.10011	6.47619	7.41128	7.19744	7.19	7.7004	6.19453	5.88933	6.80663	7.22445	6.79915	6.15312	8.08949	7.90563	6.82209	7.21924	6.52627	7.38079	7.79744	6.03161	7.25262	7.12313	7.2822	6.06198	6.13534	5.76538	6.02437	7.39222	7.47782	8.20549
GPATCH1	0.72991	0.0450073	0.106173	6.79762	6.06771	7.44928	6.78956	7.44014	8.26372	5.18115	5.46975	6.88211	6.3155	6.09544	5.76695	6.87061	7.02933	7.07552	7.08833	6.34313	7.55175	6.20296	7.1341	5.87073	6.91217	7.9719	5.47109	5.90451	5.43423	5.88657	6.82902	6.88085	7.84358
GPD2	1.74349	1.98517e-08	1.94106e-06	8.26259	6.5191	8.4357	8.54814	8.48852	8.63167	8.06053	8.64705	8.47585	7.44038	8.36583	9.22886	8.05779	8.58059	7.95578	8.06867	7.81326	8.51225	7.64493	7.49143	7.67841	8.31407	8.3915	6.18044	6.21862	5.92928	6.10622	7.42304	7.25697	8.94575
GPI	1.60643	0.000215869	0.00237228	10.3232	8.71679	10.8295	11.6664	11.4933	11.2389	9.65662	9.24011	9.65394	8.76111	10.1184	10.0707	9.9159	9.67195	10.8295	11.0483	9.69907	11.2298	9.72138	10.294	9.24359	10.8233	12.34	8.86073	8.89907	8.09066	8.12383	8.99062	9.33586	9.56527
GPKOW	0.755002	0.00677843	0.0288272	7.9359	7.1809	9.25986	8.12454	7.88473	7.87263	7.65207	7.36318	8.44973	6.91271	7.90355	7.38527	8.49868	8.66633	8.17213	8.6201	7.17763	7.70868	7.32111	7.60543	7.63058	8.36807	8.6295	7.04664	7.11845	6.59322	6.78916	7.59734	7.94057	7.38325
GPR125	0.997977	0.00840016	0.0334603	7.76872	6.77074	9.12779	7.62274	7.87455	7.38943	7.13711	6.51167	7.5042	8.64088	6.21289	7.9483	7.52265	7.59711	8.17898	6.81635	8.32909	8.12852	7.71479	7.04476	8.06828	8.60151	9.1135	5.84675	6.20037	6.39776	6.26342	8.0829	7.83323	7.82668
GPR160	2.72128	1.24017e-06	4.46517e-05	8.25563	5.53435	9.2135	8.02867	9.78886	8.86035	5.84302	8.08212	6.69496	7.84119	9.10424	8.08499	7.38255	9.54942	8.62085	9.1912	7.62546	7.91492	8.05203	9.37115	6.72053	7.72414	10.314	5.77748	5.25077	6.36117	4.98799	5.40611	5.42259	7.61573
GPR161	0.909797	0.000617963	0.00517912	6.20923	5.29943	6.17554	5.48759	6.67741	6.96325	6.15862	6.33779	6.0268	6.20429	5.40322	5.45575	7.22877	6.08619	6.5953	6.63636	5.20613	6.10098	6.73927	6.11901	5.5023	6.76791	6.03334	4.95308	5.1137	5.0398	5.07249	5.71852	5.89902	6.69724
GPR180	0.709805	0.0120418	0.0428353	6.15516	5.44535	5.79495	6.77687	6.24937	5.81138	5.10416	5.86591	6.13938	5.56673	5.95366	5.61376	6.54007	6.65494	5.80584	6.34788	5.32758	7.70161	6.23185	6.04463	5.61496	7.0678	6.33613	5.07889	5.02274	5.17932	5.28594	6.28056	5.82467	6.864
GPR27	1.7914	0.00141233	0.00953784	9.40108	7.60969	10.4813	9.84902	10.7406	7.21381	9.25314	9.49469	10.7782	10.8595	9.59546	8.24449	10.6752	10.5515	9.79637	9.8505	6.70603	7.48193	9.46631	7.54085	9.37447	10.2675	8.72031	6.60778	7.73826	7.96884	7.32359	7.55555	8.4641	9.88266
GPR39	1.29856	5.74548e-05	0.000875211	6.35631	5.05775	6.09405	6.14824	6.3213	5.8885	6.31301	6.10285	6.157	5.33222	5.65845	7.41242	6.45132	6.73664	6.5587	7.10772	5.2595	6.86932	6.22405	8.21585	6.19557	5.98732	6.25116	4.63787	4.91127	5.20766	4.57956	5.59774	5.41239	6.55361
GPR64	2.09059	0.0179458	0.0557198	9.51861	7.42801	9.68719	10.488	9.77002	8.42158	8.73894	12.7931	12.4554	9.01909	6.74475	9.78526	6.68578	12.554	8.84969	12.3498	5.68602	8.77305	7.65395	6.54859	10.5367	9.63834	10.2598	6.43202	6.85357	7.5764	7.38008	7.77663	8.54938	11.9703
GPR89A	0.932071	4.33639e-06	0.00011868	9.30609	8.37402	9.35346	9.32585	9.41785	9.79103	8.8742	9.15605	8.78845	9.41062	9.69761	8.90037	9.25649	8.91519	9.13348	9.6899	9.33094	9.06441	10.0319	8.94045	9.54735	9.71167	8.97766	8.50203	8.11759	7.87774	8.11627	8.89813	8.73237	9.4191
GPRC5B	1.10398	0.0035109	0.0182816	9.11173	8.00775	9.81154	8.10247	9.06126	9.32476	8.91519	9.33862	8.63504	9.81532	10.1362	7.68478	10.6253	8.73939	9.56915	10.038	9.27468	9.43628	9.37648	7.06895	9.08329	8.38667	9.33742	8.3355	8.24706	8.55628	8.23718	7.79494	6.87556	8.6973
GPS1	1.21923	0.00025661	0.00269942	6.99133	5.7721	7.5322	6.70795	7.38142	7.52184	5.85645	6.18543	7.61405	6.89308	6.2102	6.31125	7.43655	7.15474	7.7076	7.47064	6.92567	7.22829	6.3787	7.2185	5.87519	7.42361	8.2066	5.15382	5.76378	5.07417	5.41903	6.51319	6.70864	6.56929
GPSM2	1.71074	8.11641e-08	5.59348e-06	7.30457	5.59383	7.33139	7.03535	8.0829	7.37549	6.57959	6.42488	7.43955	7.60931	6.73961	7.7298	8.05605	6.89527	7.68998	6.94099	7.01166	7.97751	7.04859	8.13816	5.9792	7.53251	7.69516	5.73176	5.25746	5.56692	5.28084	6.12814	5.59786	7.38747
GPT	0.785943	0.0163886	0.0525758	5.72707	4.94113	5.56184	6.42025	5.44907	5.6987	4.9701	5.28116	6.87121	4.86519	5.08515	5.0192	5.56406	5.98714	7.20506	6.0554	5.10821	7.56956	4.97966	5.40256	5.21705	6.05318	5.85813	4.49265	4.7206	4.674	4.80385	5.53099	5.42468	5.77369
GPT2	2.74639	1.88304e-08	1.87316e-06	8.14649	5.4001	8.79442	8.46302	7.80079	8.28236	7.71995	7.04719	6.34205	7.26474	8.14247	7.21312	10.246	8.90969	8.43926	9.33322	8.13876	8.05373	7.17262	7.65735	8.81303	9.2495	8.30222	5.43211	4.819	5.37197	5.47173	5.54695	5.75886	7.83742
GPX1	1.31317	0.000395902	0.00374153	11.9547	10.6415	12.4033	12.2957	11.6724	12.5266	11.6988	12.4554	12.2678	11.0944	11.4234	11.6419	12.1351	11.8481	12.3127	13.4543	11.6331	12.9417	11.3274	12.7789	10.2729	11.5284	12.6855	11.2249	10.5386	10.0183	9.80352	11.2283	11.0356	10.6062
GPX7	1.36908	0.000345314	0.00339965	7.80031	6.43123	8.72908	7.5181	8.14838	8.14098	6.99551	7.08739	8.6295	7.62636	8.61636	6.67779	9.09284	8.18806	8.13771	7.17999	6.71343	7.05549	7.63268	7.97334	7.98262	7.40068	7.90728	5.31188	6.61955	5.9141	5.46432	7.92838	7.34914	8.17319
GRAMD2	2.09786	4.25466e-05	0.000686991	8.25842	6.16056	6.48464	10.1306	8.91348	9.30772	9.63231	8.92636	9.05388	6.16116	7.67641	9.36878	8.29974	9.22886	8.52878	8.48852	7.08387	7.61989	6.63523	7.24135	7.5426	8.79257	8.55345	6.00424	6.175	5.82856	5.8356	6.82488	6.29511	8.01507
GRASP	0.683403	0.000398602	0.00375773	7.31596	6.63256	7.44213	6.86618	7.62755	7.67343	6.69609	7.04141	7.75934	8.02063	7.30722	6.93451	8.02833	7.76582	7.07628	7.08794	6.94099	7.09827	7.40608	7.22777	6.95771	6.94758	7.37373	6.52931	6.57203	6.38978	6.51927	6.64661	7.13838	7.67222
GRB2	0.605752	0.00881766	0.0345755	9.50613	8.90038	9.99325	8.73505	9.52667	9.67561	9.3496	9.12779	9.87647	9.16468	9.91299	9.46923	9.62584	9.4262	9.64801	9.53134	9.95273	10.1096	9.06488	9.71579	8.46344	9.76244	9.8562	9.69434	8.52766	8.19694	8.23361	9.33586	9.41387	9.14716
GREM1	1.34813	0.0187638	0.0573416	5.97645	4.62832	4.89089	6.47687	7.18511	8.0699	5.02415	5.51991	7.30204	5.20942	4.22924	8.59882	4.85205	7.4806	4.65972	4.67003	6.56373	5.67747	4.54368	6.42818	4.46713	4.93827	6.52265	4.98129	4.64596	4.47382	4.33604	4.27247	5.06036	8.17213
GRHL1	1.79775	0.000131216	0.00162811	7.48216	5.68441	6.26906	7.85475	7.99491	6.60054	7.11098	8.22342	7.66609	6.44748	8.87773	10.0357	7.43036	8.03412	5.76949	7.51238	7.29296	8.97819	6.61399	7.87426	7.26271	6.76988	7.24601	5.50394	5.02519	6.27478	5.19975	6.43545	5.66735	6.7425
GRHL2	2.1345	8.53669e-10	1.49099e-07	7.54766	5.41316	7.60488	7.40741	7.20838	6.54157	6.89075	7.25717	7.96849	7.37687	8.17957	7.44439	8.29362	7.64684	6.65634	7.5468	7.70566	8.38274	7.85906	7.26271	7.33277	7.84799	7.51203	5.00087	4.69306	5.45389	5.58939	5.11089	6.63084	8.12244
GRHPR	0.659501	0.0321225	0.0840437	10.2371	9.57758	10.5367	11.1391	9.73256	10.2386	10.4738	10.4299	10.3693	8.56087	10.5963	10.229	9.63834	9.96836	11.1027	10.6524	10.7311	10.9355	9.5623	9.72555	9.78956	11.0883	10.3053	9.33094	9.33809	9.03848	8.84865	10.2363	10.673	9.41016
GRINA	0.97948	0.000572483	0.00489477	6.92839	5.94891	6.22215	7.57581	7.43004	6.98609	7.16125	6.10843	7.37046	5.69035	6.22455	6.51896	7.40441	7.01295	7.77785	7.25408	7.15127	7.33277	6.07092	6.96165	6.27192	7.41542	7.78987	5.8709	5.74835	5.90534	5.55213	6.3894	6.22735	6.69348
GRPEL1	1.42392	2.99881e-06	8.92779e-05	9.14179	7.71787	9.34463	8.80918	9.28099	8.04727	9.54901	9.83952	8.70915	9.02108	8.53155	9.16361	8.89136	9.06004	9.76825	9.13348	9.34678	8.49841	8.33773	10.1686	8.66312	10.138	9.95406	7.45864	7.91118	7.3626	7.38943	8.11099	8.07437	8.86363
GRPEL2	1.17284	0.000156218	0.00185773	7.40692	6.23408	7.38194	8.0486	7.19409	7.40068	6.56999	6.76192	8.17213	7.20757	7.15396	7.84859	7.43641	7.37251	7.12694	7.95354	6.22995	7.21381	6.86976	7.68582	6.57875	7.92672	8.39401	5.81909	6.05382	5.67583	5.85444	7.02667	6.97465	8.42466
GS1-164F24.1	0.623976	0.000869298	0.00667434	6.77287	6.1489	6.70737	6.92445	6.3279	6.4679	6.17854	7.00329	6.97909	6.35589	6.64119	7.67841	6.60554	6.79106	6.98059	6.9481	6.60507	6.86605	6.77331	6.24868	7.10811	7.23151	7.00624	6.40479	6.18476	5.62237	5.71584	6.39634	6.56929	6.57494
GSDMD	1.74854	5.57641e-06	0.000142557	8.37204	6.62351	8.67717	8.24217	8.83525	8.26327	9.18426	8.06154	9.91207	7.24625	9.11815	8.70751	7.47633	8.27327	8.56939	8.77675	8.18934	7.27329	7.26123	8.4021	7.65271	9.30508	8.82163	6.3381	6.27323	6.00984	6.13067	7.47137	7.51783	7.93618
GSK3B	0.887884	0.000137635	0.00168401	8.20341	7.31552	8.04171	8.09681	8.21779	8.54307	7.7332	7.6699	8.09162	7.95622	8.63388	7.81678	8.79745	8.48579	8.51023	8.14998	7.37229	8.53408	8.59492	7.85211	7.92374	8.7079	8.06652	7.13549	7.11829	6.7425	6.76274	8.01336	8.12075	8.67895
GSPT1	1.22498	0.000173284	0.00200441	8.76298	7.538	8.84008	9.22196	8.65333	8.84556	8.47665	9.6343	8.31503	8.75435	8.3355	7.16442	9.57469	8.97937	9.40534	8.99811	8.49476	10.1214	7.36043	9.08236	8.40176	8.95517	8.64151	7.14214	7.2107	7.27723	7.31745	8.15282	8.12766	8.52955
GSS	1.02119	0.000217641	0.00238602	8.35086	7.32967	8.15136	8.16839	8.81165	8.51426	8.12169	8.35459	7.68081	7.62824	7.68904	8.43095	8.45374	8.80381	7.84003	9.45083	8.28124	8.4502	7.76762	8.60865	8.00823	8.54446	9.60421	7.2185	7.32597	7.02689	6.43143	7.78318	8.19201	8.3549
GTF2A2	0.638988	0.0149693	0.0495154	8.60679	7.9678	8.30515	9.00965	8.53714	8.98298	9.04474	7.81734	9.60271	8.39965	7.90627	8.14285	9.46631	8.93509	8.38392	8.23972	9.56155	8.23361	7.98763	8.59228	8.67074	8.46465	8.7602	7.59178	8.06726	7.27954	7.34904	8.81243	8.70675	8.30515
GTF2E1	1.1355	7.8495e-05	0.0011025	8.96047	7.82496	9.54078	8.95559	9.45664	9.18521	8.47846	8.21551	8.51343	8.51554	9.83027	8.79779	8.74478	9.3081	9.89823	8.58158	8.10247	9.2815	9.11815	9.28887	8.51426	9.19549	8.63844	7.47782	7.9029	7.06766	7.11897	8.62223	8.7602	8.96917
GTF2E2	0.647066	0.00526353	0.0242606	8.46982	7.82275	8.48789	8.70717	7.97679	8.80764	9.03929	7.89048	8.03858	8.40049	7.18712	8.11319	8.6419	7.81447	9.30903	8.92909	9.14491	8.66953	8.89213	8.44076	8.38886	8.6973	8.14556	7.46439	7.9542	7.74302	7.46759	8.06024	8.24706	8.61384
GTF2H2	0.811828	0.00540112	0.0246958	8.43105	7.61922	9.26431	8.9645	7.86498	9.01019	7.85664	7.7876	7.77558	7.94758	8.40117	8.13315	8.38516	8.35049	8.35134	9.47348	7.55726	8.51972	7.95187	7.66386	9.2555	8.09808	9.1874	7.60058	7.33172	7.1727	7.68491	8.24449	7.68093	9.68325
GTF2H3	1.0342	0.00045761	0.00414494	7.92311	6.88891	7.84739	8.32553	7.3942	8.08723	7.90591	7.09464	7.52049	7.88431	7.30086	6.89067	7.42527	9.25192	8.24358	8.17856	7.44038	7.36412	8.10057	8.38105	8.47885	8.22134	8.5307	6.45716	6.79681	6.43265	6.27478	7.62112	7.75092	8.44076
GTF2H4	0.934833	0.000115974	0.00148405	6.94382	6.00898	7.32456	6.30884	6.97647	7.74723	6.67216	6.13605	6.6056	6.78712	6.56828	7.49045	6.61322	7.72546	7.16245	6.76192	7.2446	7.15685	7.52032	6.75085	6.60087	7.00253	6.91633	5.84023	5.77921	5.41002	5.65797	6.85527	6.5112	6.69178
GTF2I	0.704595	0.00695731	0.0293534	11.3525	10.6479	11.5436	11.1073	11.1835	11.4831	11.4474	12.0219	11.4783	11.3745	10.5313	10.9323	11.3124	11.842	11.2744	11.3643	11.4457	11.5415	11.778	9.92687	12.0184	11.6122	11.0001	10.4274	10.5612	9.79579	9.98693	11.4831	11.6331	11.5361
GTF2IRD1	2.19974	3.07206e-07	1.56688e-05	9.72324	7.5235	10.5796	7.91936	10.4128	9.6572	8.68582	9.37175	10.2473	9.47676	10.3423	8.17925	9.61178	9.84511	10.2082	10.5406	10.0319	10.3988	9.54346	9.2815	9.2735	10.1961	10.6683	6.72645	7.34582	7.01423	7.24653	8.15227	8.6557	9.43996
GTF3C2	1.30198	4.77986e-06	0.00012791	10.1664	8.86444	10.0492	10.4019	10.0627	10.5524	10.7298	9.52717	10.1697	10.5377	10.2985	9.66618	10.0643	10.7747	9.46232	10.1616	9.27147	10.7283	10.9287	9.98	10.0178	9.47495	10.4128	8.35098	8.86591	8.2701	8.35459	9.44685	9.89823	10.3891
GTF3C3	0.923683	0.000733151	0.00585558	6.96598	6.0423	6.6369	7.10177	6.83161	7.07863	5.96439	6.45406	7.20682	6.17207	7.69848	6.62545	7.07502	7.62141	7.98326	7.38792	6.75221	7.15735	6.76132	6.00132	6.87286	7.44283	7.27156	5.51894	5.78239	5.52465	5.83463	6.92952	6.66367	7.15437
GTPBP2	1.04669	0.00149791	0.00992823	7.62016	6.57346	7.83609	6.76119	8.02624	9.14157	6.36583	7.13252	7.45055	8.14806	6.82375	6.88022	8.03858	7.82733	7.38079	7.37283	7.70078	8.06279	7.78609	8.19201	7.23063	8.1806	7.54933	6.2008	6.04332	5.8556	6.00462	7.54744	7.789	7.75564
GTPBP3	0.992539	2.16965e-05	0.000406233	6.86585	5.87331	6.93395	7.22243	6.91043	6.56052	5.88539	6.54796	6.65609	7.49876	6.90759	6.49523	7.38142	7.39769	7.07277	6.64133	6.28074	6.83998	6.50436	7.07277	6.80971	6.93627	7.06325	5.37461	5.57287	5.62271	5.5905	6.55937	6.51981	7.43004
GTPBP4	1.81611	1.46655e-07	8.72435e-06	10.0729	8.25675	9.82462	10.1524	9.88114	10.8902	10.1979	8.36616	10.229	10.2188	10.3733	8.77796	10.6696	10.1874	10.2558	10.1113	10.2913	10.2611	10.2843	10.0688	9.97579	10.2985	10.6214	7.53189	8.26582	7.67103	7.88824	9.10585	9.07766	9.66618
GTPBP6	0.853669	0.0217007	0.0634197	7.73002	6.87635	7.53055	8.2701	8.32689	7.41166	7.25739	6.83217	8.53432	6.49646	7.16035	6.99445	7.66609	8.58309	9.04291	9.10216	6.86618	8.44459	6.71519	8.07267	6.3155	8.21963	8.22184	6.30364	6.7669	6.5848	6.26686	7.39362	7.94232	7.99635
GUCD1	0.913059	0.00319077	0.0171252	8.95488	8.04182	8.9665	8.85506	9.37043	8.60391	9.10816	8.49911	8.65848	7.92222	9.97108	8.70297	8.78998	9.02633	9.03908	8.91373	9.23164	9.56155	8.12348	9.56791	7.64059	10.6486	9.27769	7.8976	8.1705	7.53846	7.4738	8.41121	8.75933	8.52878
GUK1	1.12857	0.00223893	0.0132918	8.64215	7.51358	8.24671	9.45632	8.71957	8.57535	9.16317	9.42436	9.17618	7.36737	7.68769	7.39741	8.28754	8.77914	9.66286	9.26557	8.01235	9.61693	7.62986	8.98548	8.15247	9.68325	8.76771	6.83481	7.65591	6.88762	6.81978	8.32865	8.55471	8.0699
GYLTL1B	1.09597	9.01696e-06	0.000208814	7.14054	6.04457	6.99953	8.13292	7.56469	7.10333	7.04752	7.09542	7.4339	6.713	6.95437	6.30971	7.87922	7.92161	7.4508	7.2107	6.93047	7.49519	6.81968	6.41224	7.28246	7.09224	6.70575	5.72704	6.11272	5.83385	5.96081	6.1541	6.47891	6.53704
H1F0	1.54873	0.00637153	0.0276729	9.99642	8.44769	9.97781	10.1487	8.96574	9.04474	11.3524	8.99301	8.16049	10.7873	10.9576	10.9503	10.3603	8.16168	9.57877	10.6683	8.96258	9.82537	11.6635	9.47495	10.2018	11.3487	11.8549	7.91337	8.92496	8.16902	5.99865	10.1231	9.557	8.48225
H1FX	1.27119	0.0002309	0.00249787	10.0757	8.80447	10.1467	10.3363	10.4299	10.4614	10.2565	10.5336	9.47093	10.3931	9.91133	9.19404	10.683	10.3152	10.3594	9.204	8.58236	9.57682	10.6789	9.51096	9.55959	11.2206	10.4389	8.20407	8.98871	7.90355	8.11742	9.51626	10.0968	10.4011
H2AFB1	0.602655	0.00899106	0.0349975	6.52381	5.92115	6.76119	7.1716	6.49281	6.62722	5.84226	6.23253	6.79556	6.25049	6.7416	6.11211	6.80033	6.54231	7.09502	6.72476	6.12833	6.69426	5.92981	6.41782	5.71473	6.7858	7.00531	5.1345	5.80225	5.54196	5.50037	6.60965	6.9382	6.65795
H2AFX	1.39892	9.4634e-05	0.00127516	7.42514	6.02622	7.7262	6.33652	7.24569	7.7356	6.99944	7.11307	7.87281	8.31773	6.80333	6.4618	8.20762	7.10791	8.71714	7.13014	6.9824	8.13514	6.47643	7.69403	6.1377	7.73303	8.55471	5.54144	5.59387	6.14181	5.72027	6.58138	6.57858	7.86472
H2AFY	0.995355	8.68955e-05	0.0011891	10.1316	9.13622	10.0643	9.78708	9.77799	9.902	10.1063	9.33156	10.3457	10.0329	10.1774	10.798	10.5326	10.4506	9.80021	10.683	10.004	9.27595	9.85858	9.85345	9.89307	10.8952	10.6402	9.46923	8.72214	8.63167	8.46092	9.73189	9.80148	10.6845
H2AFZ	1.04068	4.06119e-06	0.000112494	12.2394	11.1987	12.3308	11.6078	11.8741	12.7045	12.1827	11.8696	12.0364	12.9563	12.0269	11.8577	12.0982	12.2009	12.4128	12.3171	12.8171	12.2999	12.5987	11.9327	11.8599	12.5482	12.7552	11.1156	11.2663	10.5634	10.7532	11.5527	11.9409	11.9786
H3F3A	0.857406	2.76945e-05	0.00049082	12.7721	11.9147	12.9623	12.1888	12.4554	12.6538	12.8075	13.0628	12.742	13.0628	12.9115	12.4554	12.742	12.7595	12.5482	12.4402	13.3045	12.903	13.1859	12.152	12.9791	12.9508	12.8869	11.488	12.0184	11.4234	11.3626	12.5035	12.6922	12.8321
HAGH	0.782865	0.00218946	0.0130786	8.37157	7.58871	8.32838	8.33751	8.66674	8.81515	7.8105	8.61311	8.6068	8.41543	8.3067	7.46059	8.6973	8.40688	8.06767	9.59168	7.73303	7.98191	7.70646	8.6973	8.24928	8.47947	9.42929	7.17111	7.49127	7.27935	7.26219	8.11566	8.21266	7.7734
HAPLN3	1.09953	0.000112993	0.0014524	6.99008	5.89055	7.44724	6.78688	7.28181	7.28194	7.75648	5.90966	7.17416	5.92838	6.27841	7.24228	6.69624	6.77833	6.72334	6.8887	6.24776	7.27544	6.97502	7.80865	8.20362	7.22707	7.35348	6.25227	5.97418	5.45524	5.5785	6.08439	5.99872	6.51693
HAUS3	1.219	0.000445168	0.00406443	8.4585	7.2395	8.6194	7.8962	8.10419	7.85573	7.8634	8.29925	7.97993	7.70303	8.07655	8.6194	8.78888	8.3373	9.11638	8.32408	8.64721	8.43146	7.15995	9.47093	8.55037	9.61746	8.8396	7.42607	5.9182	6.71563	7.37741	8.44618	7.55349	9.78621
HAUS6	0.910666	0.00919946	0.0355197	7.19031	6.27964	7.74881	7.99635	7.11468	7.5283	6.61569	5.99687	6.81593	6.83371	7.88943	6.82414	6.9313	7.68182	6.52994	6.70476	7.67439	7.90088	7.44532	7.24387	5.20741	7.80999	7.96935	5.5878	5.74483	5.6826	6.13278	7.57301	6.95684	7.7239
HAUS8	0.925934	0.000300308	0.00304567	6.30296	5.37702	6.6303	6.19838	6.59168	6.38485	5.46126	5.51827	5.68905	6.60462	5.51231	5.49408	7.32617	6.87949	6.5848	6.76146	6.05184	6.32681	6.04641	6.80403	6.22947	6.20559	6.97225	5.25854	5.16636	5.30142	4.92842	5.88787	5.71952	6.3919
HCCS	1.16425	0.000378981	0.00362201	8.17411	7.00987	8.51101	8.89213	9.01761	7.87836	8.43699	8.33183	9.13838	6.95668	7.79464	8.06513	8.09092	8.92766	8.73237	8.34369	7.37706	7.96067	6.77516	8.40438	7.55639	8.21418	8.79745	7.054	6.9389	6.34912	6.22362	7.68769	7.80586	7.62783
HDAC1	1.10995	0.000763317	0.00604105	10.2135	9.10354	9.96347	10.5106	10.3828	10.8404	9.9473	10.4483	10.1104	10.0373	10.8248	9.27147	11.3931	10.4483	10.7893	11.157	8.96303	10.314	10.1113	9.62769	8.56426	10.2325	10.4953	8.66633	9.47781	8.44166	8.62895	9.35059	10.0559	10.2639
HDAC11	0.619702	0.0162905	0.0524009	7.27559	6.65589	6.83873	7.63489	7.14753	7.04452	6.75866	6.64153	8.06422	6.67148	7.19585	7.32216	7.40807	7.19093	7.44679	8.39085	6.84365	7.48146	7.06062	7.48299	6.32569	8.74226	7.52475	6.63263	6.63362	6.47908	6.20396	6.74583	7.24019	6.84532
HDAC2	1.03389	0.00239707	0.0140018	9.34827	8.31438	9.80916	8.89587	9.35602	9.80615	8.48769	8.94965	9.677	9.24881	9.17659	7.94386	10.2131	10.2721	8.96258	9.40534	9.23897	10.1487	9.56088	9.08648	7.9446	9.114	10.4592	7.88563	8.18839	7.31662	8.04975	9.22021	9.2257	9.9052
HDDC3	1.22032	0.000609419	0.00513195	9.1968	7.97648	9.13413	9.6531	10.083	8.20954	9.68157	8.92587	8.70538	9.43576	9.96909	8.18913	9.94155	9.011	10.0412	8.93544	9.5	9.05161	8.20983	9.82462	8.09306	9.61534	9.71108	7.63571	8.2189	7.11361	6.98143	8.7721	9.13716	8.40838
HDGFRP3	0.755005	0.0198966	0.0597341	7.78744	7.03243	7.50161	7.5689	8.30182	7.79339	8.04762	7.68452	8.01664	8.62809	7.22751	7.09989	9.26501	6.8831	7.89672	7.34966	7.83846	5.58021	7.87208	8.76889	7.89572	8.4641	7.68652	6.73028	7.03673	6.70531	6.74125	7.42076	7.56027	7.95316
HDHD3	0.892213	0.00317199	0.0170644	6.7614	5.86918	6.7101	6.60202	7.00954	6.85166	5.75656	6.36824	6.79313	5.58456	6.62722	6.87556	6.87213	7.07578	7.90534	7.45359	6.87061	7.56861	5.72696	6.77924	6.30396	7.29873	7.42137	5.15166	5.48918	5.51649	5.57136	6.50272	6.9837	6.29585
HDLBP	1.02077	0.000138244	0.00169055	9.84997	8.8292	9.4298	10.2399	9.90819	10.1207	10.0537	10.0492	10.4337	9.18704	9.46671	9.1912	8.7453	10.2729	10.4592	10.3818	9.64151	10.5007	9.30903	9.19376	10.2843	10.12	10.0337	8.5105	8.65784	8.40604	8.3915	9.34394	9.66538	9.677
HDX	0.668981	0.00842852	0.0335363	6.29815	5.62917	6.49911	6.45688	5.51436	7.18546	6.56627	5.62982	5.98457	5.75301	6.0915	5.75216	7.20637	6.25362	6.62119	6.80571	5.79087	5.95479	6.07955	5.96193	6.3623	6.14493	7.24167	5.58818	5.3347	5.02788	5.25481	6.5738	5.99564	6.70318
HEATR2	1.21594	0.00120822	0.00846158	8.92735	7.7114	9.09654	9.14333	8.92766	9.36077	9.29656	7.91492	8.56705	8.81736	9.04038	6.99741	9.97424	9.61803	9.70552	9.2486	8.14915	9.7168	7.9771	8.65178	7.94892	9.2735	9.4856	7.00812	7.81499	6.9408	7.04859	8.62895	8.82697	9.49039
HEATR3	0.819748	0.0142286	0.0478328	6.54525	5.7255	6.81825	6.60867	6.65067	7.07521	5.87393	5.47624	5.89289	4.71903	6.43453	6.36906	8.11895	7.34381	6.45774	7.31804	6.19827	6.88657	5.83047	7.05068	6.11459	7.21943	6.67197	6.04595	5.26226	5.25598	5.1389	6.54912	6.10081	6.86652
HEBP2	1.01638	0.00655772	0.0282191	9.14576	8.12938	9.08389	8.82869	9.59826	8.99107	8.11786	10.394	9.48621	8.43846	8.76988	9.70552	9.43934	9.85708	9.02677	9.27986	9.12287	11.0857	7.77098	9.13838	7.49158	9.06589	9.90761	7.06667	8.15359	8.25599	7.84499	8.60033	8.85471	8.6068
HECTD1	0.601689	0.0393143	0.0967424	8.40421	7.80252	8.48225	8.74782	7.75901	8.15282	8.10118	7.40554	8.1048	7.57918	9.31708	8.31106	9.02633	8.99107	8.67271	8.43885	8.34841	8.53884	8.26806	7.84137	8.09719	8.91261	8.59376	7.25521	7.25054	6.95786	7.29159	9.10473	8.95517	9.20259
HELLS	1.38061	0.000720365	0.00578923	7.70052	6.31991	8.0345	8.12961	7.80865	7.05189	7.30674	7.53582	7.12032	7.61914	6.46549	8.33896	8.69594	7.90627	6.92229	6.53004	7.44125	6.6164	8.1806	7.89928	6.74814	9.53275	7.98872	6.03307	5.73313	5.99389	5.83786	7.2166	7.10491	9.53869
HELZ2	0.682998	0.00359662	0.0185758	6.52794	5.84494	6.90317	6.62982	7.31222	6.8471	5.96032	6.03101	7.51261	5.65727	6.17364	6.04463	6.41322	6.79509	6.53903	6.91761	6.04627	6.73734	5.76476	6.72404	6.10167	7.09437	7.02918	5.53479	5.83577	5.62849	5.67852	6.19071	6.20137	6.38031
HENMT1	1.70043	5.01987e-05	0.000784951	8.25547	6.55504	8.70056	7.767	9.39965	9.37311	6.04237	7.47252	7.65606	8.78021	8.21849	7.19661	8.22324	8.23938	9.1454	9.20627	8.83483	8.46792	7.74768	7.70684	8.21005	9.31088	7.281	6.57411	6.34548	6.40604	5.62419	7.31662	7.0638	8.64035
HERC4	0.903327	0.00923868	0.035646	7.62437	6.72104	7.23464	7.80349	7.32666	7.41807	7.06643	7.08625	8.16592	6.4616	6.80901	7.00812	9.06779	7.38717	8.38105	8.57461	7.06795	7.87056	6.65421	8.49642	7.37155	7.98262	7.92575	6.55835	6.17149	5.73122	6.51487	7.92805	7.42226	8.57621
HES4	0.700581	0.0275111	0.0751319	5.86635	5.16577	6.01939	6.27861	5.8832	6.14816	5.01687	4.90983	6.11771	5.29322	5.16892	5.17762	6.69983	6.46044	6.06259	5.68316	5.06142	6.93619	4.98041	6.78492	4.72204	6.78309	5.87558	4.85526	5.41974	4.67483	5.00292	5.54278	5.49911	6.99658
HES6	0.689579	0.0213576	0.0626329	7.73381	7.04423	7.70665	6.82942	8.10247	6.44046	8.00954	7.34313	7.73689	8.13454	7.87966	6.4612	8.08679	9.07105	8.32523	7.18927	7.91044	8.06693	7.62575	7.43087	8.18402	8.08193	8.36887	7.17687	7.8763	6.76426	7.62495	6.42794	6.39508	7.15874
HEXA	0.600192	0.00284714	0.0157616	8.23505	7.63485	7.83323	8.10665	8.48268	8.97428	8.25558	7.98753	8.73988	7.77872	8.52878	8.06966	8.27045	8.21551	7.94021	8.53246	8.20318	8.58447	7.98609	7.97483	8.11068	8.34841	8.21674	8.02203	7.18452	6.89527	7.05502	8.20612	8.44618	8.03099
HEXIM2	0.704396	0.00470089	0.0223889	5.9714	5.267	6.88251	6.29049	6.87828	6.168	5.57981	5.39452	6.36614	5.30821	5.442	5.02555	6.36777	6.39776	6.15186	6.14687	5.9978	5.18082	5.30178	6.175	5.58188	6.13302	6.71312	5.12766	5.21535	5.01119	5.13416	5.28503	5.82864	5.8876
HIATL1	0.60679	0.0062753	0.0273692	8.80259	8.1958	8.0374	8.56814	8.8008	8.42069	8.69114	9.32333	8.93444	7.81499	8.83017	9.61462	9.24503	9.44744	8.88721	8.50817	8.71435	8.92176	8.19903	8.58476	9.1912	9.12578	8.91113	8.14137	8.33305	7.48757	7.82516	8.63985	8.74782	8.88545
HIGD1A	1.05998	0.000429613	0.00396353	11.2206	10.1606	11.2389	11.6854	10.5796	11.3172	11.1441	11.9518	11.5714	10.2072	10.7488	10.7096	11.3154	11.4783	11.6313	12.1827	11.3102	11.7839	10.7311	10.3891	10.5648	12.1443	11.8696	9.79877	10.293	9.57682	9.75208	10.7747	10.7682	10.2979
HINT3	1.0268	0.0202808	0.0604749	6.77688	5.75008	7.62218	6.06372	6.91642	7.66178	5.31478	6.31371	7.96377	5.23736	7.12414	5.2559	8.16973	7.89178	6.87875	7.23036	5.88828	8.15043	5.83882	6.56504	5.49896	6.8922	7.47276	5.36488	5.35864	5.17102	5.00501	6.69822	6.90267	7.1405
HIP1	0.633161	0.0450305	0.106205	7.82249	7.18932	7.40204	7.365	7.9592	8.06169	8.17286	9.44562	8.29563	7.60085	8.16198	7.54311	7.91078	8.22833	8.07655	8.13633	7.25987	7.24357	7.69024	6.13871	7.78283	8.25315	7.78836	6.32919	7.52449	6.24805	6.60797	8.18368	8.24256	7.57797
HIST1H1B	0.657704	0.00183573	0.0114821	4.6718	4.01409	4.91973	4.50323	4.73824	4.52027	4.38752	4.07162	4.97931	4.09313	4.10819	4.28775	4.86327	4.78133	5.58221	5.05659	4.60697	4.9117	5.06616	4.13285	4.36385	5.13542	4.81737	3.81881	3.66328	3.90782	3.47015	4.57974	4.64475	4.85281
HIST1H1C	1.89819	0.000953268	0.00715108	8.15428	6.25609	8.57092	6.26393	8.45721	7.91769	7.42541	9.24792	7.45298	10.3921	6.81108	7.64786	6.84331	8.63504	10.9745	8.10266	9.64702	9.16963	6.87612	9.50986	6.68459	7.65069	7.44283	5.7092	5.79518	7.66098	5.93904	6.46783	5.96432	7.67073
HIST1H1E	0.947577	4.0144e-05	0.000657948	5.28549	4.33791	5.35151	4.75515	5.12275	4.82095	4.93176	5.12887	4.88802	5.39452	4.55099	5.12486	5.49954	5.76056	6.54672	4.85323	5.90246	5.58427	6.00675	4.96684	5.36548	5.11141	5.48114	4.22721	4.33469	4.14472	4.32828	4.49194	4.50063	5.13305
HIST1H2AC	1.85671	0.000272373	0.00282153	9.75878	7.90208	9.557	8.78493	9.50772	10.4922	10.34	9.14991	9.27108	10.1686	9.04093	9.36354	7.4627	10.2399	10.7618	10.4678	11.4661	11.1627	9.84119	10.5326	10.6424	8.61154	8.28908	6.60471	7.17134	7.69308	7.33809	9.54735	9.05789	9.5395
HIST1H2AE	1.90461	3.24118e-05	0.000555492	7.06147	5.15686	5.74707	5.94993	6.62597	8.50415	7.75198	6.81921	6.79484	9.12934	5.71473	5.84023	6.2949	7.76223	7.15144	7.88457	8.50149	7.50912	6.92979	7.17031	7.53687	6.84177	5.81822	5.31188	5.16592	5.74198	5.02488	4.99038	4.70611	7.07415
HIST1H2AJ	1.79079	8.5955e-05	0.00118188	6.64345	4.85265	6.26952	5.30717	7.12381	6.85581	6.30386	8.4655	5.96747	8.07253	6.18943	5.2228	5.78698	6.39014	8.44325	7.42236	6.89095	6.87932	5.6156	7.72305	5.5191	7.33018	6.30866	4.5498	4.42186	4.92912	4.63051	5.61745	4.96718	6.06832
HIST1H2BD	1.43232	0.000461445	0.00417072	9.1619	7.72958	8.07853	8.00589	9.25256	9.80717	10.1616	9.204	8.31305	9.47546	9.11952	8.82623	7.29031	10.1733	9.7435	9.47495	10.2473	10.0868	8.51972	10.446	9.56729	8.83125	8.06024	6.81357	7.29159	8.46123	7.64852	8.2905	7.87208	8.8771
HIST1H2BJ	0.666387	0.00200531	0.0122645	4.86904	4.20265	4.94089	5.0193	4.65225	5.38687	4.18032	4.27494	4.91096	5.73168	4.15398	4.29369	4.86118	5.09908	5.47624	5.14315	4.6512	5.4583	4.22924	5.12085	4.51078	5.15424	5.15977	4.21025	4.23064	3.94091	3.94341	4.63893	4.25178	4.70997
HIST1H2BK	0.974156	0.0321549	0.0840991	10.9714	9.99724	11.1206	9.50538	10.8064	11.8481	11.1816	10.9665	9.33586	13.0326	10.3073	11.276	8.95591	10.791	12.3498	11.3056	11.7633	11.9258	10.5139	12.5432	11.5259	10.297	9.58701	9.23935	9.85345	10.6683	9.94006	10.3901	9.89216	10.432
HIST1H2BO	1.01685	0.000326781	0.00325463	5.35545	4.3386	5.00594	4.51794	5.41476	5.60699	4.86036	5.51827	4.7215	5.87288	5.1345	4.58502	4.93005	5.99703	6.09055	5.68875	5.78786	5.9305	4.74086	6.29884	5.25959	5.43503	4.93076	3.23627	4.21769	4.78181	4.1426	5.23477	4.41845	5.49192
HIST1H4A	1.52909	0.000147884	0.00178447	9.89531	8.36622	10.4274	10.1574	9.46671	9.83407	8.78426	9.0091	9.41281	10.8624	9.78089	8.32451	10.8968	10.6752	10.2173	9.46631	9.97108	10.1238	11.1911	9.41387	9.20138	9.92596	10.8647	7.66806	8.26116	7.76033	7.4023	9.40464	9.70085	9.6899
HIST1H4D	0.628185	0.000628197	0.00524085	5.10226	4.47407	5.36902	4.77718	4.74149	5.20994	4.80782	4.85814	4.85839	5.47941	4.75982	4.65774	5.60664	5.44907	5.54309	4.63804	5.1045	5.51588	5.62714	5.0592	4.90918	4.91347	5.67456	4.24	4.24687	4.57711	4.231	4.92654	4.62291	4.68991
HIST1H4H	1.24151	0.00648217	0.027994	6.91569	5.67419	6.59672	5.64776	6.41814	8.94618	7.18415	6.09367	6.3782	9.04525	5.78403	5.74707	6.12219	6.91568	7.789	8.09457	8.24706	7.89459	6.54962	7.80188	6.8887	5.77762	5.97465	5.56321	5.65416	5.95879	5.31448	6.12833	5.42615	6.24851
HIST1H4J	1.07153	0.0157385	0.0512834	8.33674	7.26521	9.15446	7.67901	8.57237	8.91687	8.04651	6.89124	10.0707	7.42923	7.91306	6.70199	9.15107	8.34001	8.71186	8.32523	7.88685	9.3056	10.1995	8.10103	6.76741	7.68802	10.1554	7.13089	7.30404	7.64306	6.86313	7.2654	7.38475	7.40096
HIST2H2BE	1.03412	0.00646548	0.027936	8.05334	7.01922	7.20559	6.69691	8.513	8.25853	8.27223	9.21246	6.70014	9.16661	7.8749	7.70538	6.88144	7.36007	9.31378	8.88075	9.12461	8.39692	8.11456	8.12518	8.08756	9.09606	6.89095	6.96818	6.92625	7.45125	7.38971	6.70154	6.6784	7.29582
HIST3H2A	1.99004	9.59783e-06	0.000218088	8.73453	6.74449	8.1948	7.92434	8.96917	9.19268	7.81609	9.47283	9.0027	9.45696	9.78708	7.01195	8.04485	8.60789	9.95273	9.53275	8.36342	8.75344	8.6244	9.0527	6.96423	9.79877	9.70828	6.04148	6.74046	6.25904	6.31594	7.37283	7.73721	7.92768
HIVEP1	0.590906	0.0255659	0.0713005	6.02817	5.43727	5.91273	5.71962	6.36744	6.75938	5.89487	5.51991	6.53813	5.07782	5.57175	5.6088	6.57494	6.10562	6.65756	6.16456	4.83409	6.80403	5.53372	6.15186	5.93198	6.41363	6.24815	4.76948	5.13296	5.02879	5.25353	6.60757	5.83127	6.2292
HIVEP2	1.50284	0.00150284	0.00995511	8.84963	7.3468	8.5167	6.98885	8.57812	8.78712	8.16627	9.12118	9.2113	7.2107	8.78135	8.84199	9.45191	8.72142	8.57092	9.30683	9.28294	9.13891	9.62033	8.10757	8.01124	8.23938	10.0312	7.17389	7.20515	6.5992	6.56093	8.17436	8.36726	12.0057
HJURP	1.53788	7.0875e-08	5.18089e-06	7.15885	5.62097	7.15685	6.90579	7.38079	7.43217	6.94089	6.85053	7.04773	6.83481	6.12877	6.1615	7.5689	7.33382	7.71287	6.88022	7.30111	7.26996	7.09303	7.89476	6.58424	7.35747	8.0694	5.84449	5.59839	6.13542	5.79832	5.17385	5.17535	7.58918
HK1	1.94827	6.56756e-07	2.81924e-05	10.9758	9.02755	10.7682	10.5464	10.9861	11.2972	10.7873	11.1391	11.8379	10.2152	11.2073	11.0552	12.7475	11.34	11.745	11.7759	9.57542	11.3365	10.1884	11.0132	10.326	10.6062	10.2315	9.38908	8.64656	8.7437	8.01851	9.69907	9.66838	10.7427
HK2	1.46876	8.06812e-05	0.00112423	8.4385	6.96975	9.45831	8.96777	8.05303	8.35049	9.36747	8.74681	7.0417	8.41886	7.52487	9.63545	9.04168	9.38545	7.58259	7.79339	8.24928	8.43223	8.57421	7.44439	8.34669	8.13166	7.94863	7.82381	6.42393	7.36166	6.74077	7.49801	5.9703	9.15211
HKDC1	0.835021	0.0164982	0.0528357	6.10142	5.2664	6.49609	5.73961	5.56477	6.26744	5.52433	5.15733	6.12213	6.32322	5.03584	5.05351	8.51595	5.66832	6.62954	6.74897	5.2849	6.09061	6.5951	6.59219	5.93288	5.65628	6.35342	4.90345	4.92741	4.93176	5.00784	5.81642	6.0115	6.87875
HLCS	0.691285	0.00463872	0.0221805	6.30857	5.61728	6.24287	6.29999	6.50317	6.35285	5.69708	5.96925	6.86364	5.53779	6.05667	6.2605	5.88872	6.55585	6.88011	7.43832	5.7316	6.98701	5.71513	6.08679	5.8142	6.96217	6.73238	5.18151	5.40395	5.08003	5.86776	6.16732	6.00311	6.21234
HLTF	1.71631	6.04923e-05	0.000907301	10.7081	8.99182	11.2036	10.1158	10.8442	10.6295	8.4377	10.9009	9.84177	10.7473	11.7738	10.3733	10.5708	11.6854	10.8688	10.9337	10.8635	10.9034	11.1539	9.47676	10.8583	11.7811	9.92152	8.53884	7.92401	8.36696	8.95517	10.3977	9.76825	11.6941
HM13	0.952026	2.38206e-07	1.28541e-05	7.71872	6.76669	7.66912	8.15475	7.57434	7.70161	7.53717	7.49519	7.56249	7.91188	7.76114	7.61029	7.82221	7.4508	7.55929	7.8316	8.03154	7.92313	7.55697	7.78651	7.94386	7.3306	8.15696	7.544	6.4428	6.26759	6.43658	7.01072	6.89848	7.44038
HMG20B	0.786212	0.00496866	0.0233291	7.50509	6.71887	7.77598	8.48363	7.95289	7.43354	7.13581	7.21043	7.62603	6.49721	6.97848	7.13861	7.60113	7.59896	8.48268	7.33636	7.40554	7.73036	6.328	7.50932	7.32111	8.03723	7.93906	6.1066	6.47397	6.2657	6.17781	7.41141	7.87774	7.58952
HMGA1	1.39787	1.47006e-05	0.000303526	8.39176	6.99389	9.0563	8.67435	9.33375	8.53793	8.12558	8.47548	7.65448	9.14924	8.40406	8.27952	8.1095	8.29081	7.90946	7.34263	8.81515	8.16973	8.39692	9.52174	7.34966	8.67717	8.7261	6.4962	7.17416	7.9948	7.32527	6.45438	6.51853	7.61914
HMGA1P4	1.45513	3.22537e-08	2.80905e-06	7.68323	6.2281	7.71831	7.72358	8.06455	7.33444	8.23034	8.05875	7.19	8.45932	7.49106	8.12283	7.53423	7.71831	7.26571	6.82525	7.92096	7.48828	7.90811	8.22632	6.84552	7.84762	7.89538	5.93904	6.12946	6.47527	5.8327	6.36063	6.63152	7.16222
HMGB1	1.08278	8.25093e-07	3.32661e-05	12.2408	11.158	12.2087	11.9818	11.778	11.9851	12.3171	12.3902	12.1421	12.6411	12.2177	12.3859	12.3859	12.4402	12.2957	11.6664	12.0839	12.4033	12.6411	11.6664	12.4869	12.5229	12.435	10.9109	10.9287	10.6295	10.5952	11.9137	11.9703	12.2225
HMGB2	1.37005	2.49796e-06	7.79718e-05	10.9601	9.59007	11.2249	10.3585	10.5826	11.2368	11.1756	10.6379	11.3704	11.8549	10.2505	10.7138	10.9623	11.188	11.0111	10.6113	11.6366	10.8064	11.5497	9.67431	10.4792	11.468	11.359	10.0063	9.77423	8.85601	9.0091	9.82809	10.0667	10.9707
HMGB3	2.69774	3.98355e-11	1.1349e-08	10.1944	7.4967	10.1715	9.19518	10.297	10.1509	10.791	9.93828	9.42436	9.90761	10.4162	9.65813	9.81251	10.7532	10.6295	10.7119	10.7532	9.38176	10.9954	9.92964	9.87934	11.1281	9.53275	7.4023	7.00018	7.43999	6.64788	8.2608	8.22906	10.8204
HMGB3P1	1.06128	2.19731e-05	0.000410068	7.75767	6.69639	8.8993	7.7298	8.78606	7.51513	8.37159	7.94514	7.55499	7.86889	7.96849	7.40338	7.59122	7.85045	7.64335	8.38516	7.81713	7.05849	7.43289	7.19071	7.47415	7.6467	7.03673	7.05369	6.64039	7.02453	6.6666	6.32733	6.46581	7.49909
HMGCS1	0.870786	0.00951737	0.0364143	7.44645	6.57567	7.73826	6.81108	7.63622	7.54563	6.65177	7.50599	7.11126	6.25275	8.40543	6.76556	8.39729	7.68503	6.71343	7.54085	7.25239	7.96247	8.03593	6.7302	7.02543	8.47157	7.65622	5.82767	5.97495	6.28115	6.22392	8.44076	6.70554	7.92719
HMGN1	0.727698	0.000597544	0.00505989	12.61	11.8823	12.8171	12.742	12.0484	12.605	13.0326	12.1351	12.6624	12.3308	12.3859	12.6479	12.7789	12.6479	12.8321	13.0477	13.0326	11.962	12.4711	12.0982	13.1859	12.7664	12.6538	11.8599	11.9034	11.1258	11.2432	12.6183	12.5432	12.5366
HMGN2	0.687725	0.000935238	0.00703658	13.0037	12.316	13.1967	12.4816	12.559	13.1859	12.5083	13.4153	13.1967	13.442	13.0628	12.903	13.2072	13.0706	13.2299	12.97	12.97	12.8791	12.9563	12.6411	12.2999	13.6351	13.0162	12.2087	12.4816	11.6331	11.6187	12.9563	12.9977	13.2552
HMGN3	0.924201	0.00473659	0.0225328	12.4679	11.5437	12.7475	12.3859	11.1595	12.7931	11.9518	12.9563	12.9339	11.6884	12.6922	11.7588	13.0402	12.8251	12.2177	12.3453	13.3556	12.3859	11.9851	11.2092	12.1888	13.0898	12.987	11.1403	11.2806	10.9287	10.8732	12.4093	12.6301	13.5964
HMGXB4	0.69957	0.0242479	0.0686708	8.14473	7.44516	8.64992	7.50481	8.47771	8.15312	6.87556	7.52253	8.20762	8.25072	8.01819	7.09224	8.67626	7.81646	8.23497	8.17539	8.34669	9.05388	7.95088	8.59195	6.76009	8.79967	9.23935	6.72721	7.22115	7.03998	7.2693	8.15043	8.26291	8.78606
HMMR	1.70832	2.51885e-05	0.000457028	8.57648	6.86816	7.66216	8.78755	8.93631	9.11638	8.17539	9.36561	9.32283	8.39401	7.91431	8.4881	8.06966	8.52991	9.82537	9.59546	8.11627	7.1779	7.95729	9.41522	6.97198	8.96119	9.44876	7.70601	6.84796	7.59834	6.90014	6.33606	5.82044	8.45092
HN1	1.7747	6.14294e-08	4.68349e-06	8.63457	6.85987	9.00068	7.99812	8.99698	8.90312	8.81303	8.15538	8.85885	9.05861	8.15611	8.65255	8.88032	8.09748	9.6112	8.82697	8.85301	8.51791	8.04633	9.59826	7.24741	8.74587	9.23476	7.04995	6.62759	6.65718	6.52302	7.2791	7.02239	7.7076
HN1L	1.79725	1.04807e-09	1.72308e-07	10.0922	8.29497	9.96909	10.0529	9.48501	10.0412	10.3203	10.9559	9.56453	10.0725	9.97781	9.39672	10.5129	10.6513	9.84119	10.5377	9.55902	9.8526	9.45632	9.87714	10.2979	10.8013	10.718	7.83513	8.01776	8.47517	8.04633	8.64235	8.75306	10.0874
HNRNPAB	1.57798	8.86911e-10	1.52575e-07	12.1726	10.5946	12.2225	12.0947	11.2283	12.2332	11.7588	12.1863	12.3351	12.3266	12.0295	12.554	12.3732	12.0244	12.3589	12.0135	11.5612	12.0325	12.1443	12.1631	12.4033	12.7595	12.4402	10.3841	10.5276	10.0998	10.0849	11.1897	11.2816	12.554
HNRNPC	0.848851	2.96525e-05	0.000519089	11.1506	10.3018	10.8784	11.3664	10.6348	11.3274	11.3124	11.0018	10.8535	11.0082	10.8442	10.6609	11.3505	11.3137	11.096	11.5632	11.4511	11.0552	11.6366	10.9517	11.5632	11.2914	10.9623	10.2334	10.7037	9.52602	9.66977	10.6881	10.9898	11.1911
HNRNPCL1	0.710875	0.0027244	0.0153457	7.33461	6.62373	6.84059	7.58259	6.79144	7.39661	8.11261	7.01633	6.68202	7.456	6.87213	6.99246	7.4339	7.56861	7.50682	7.69964	7.79909	6.88549	8.19334	6.72786	8.23564	7.24387	7.36539	6.76917	7.24913	6.05495	6.14614	6.50341	7.0196	6.95894
HNRNPF	0.921234	0.00106893	0.00777901	8.21791	7.29668	8.40176	8.78845	7.54062	7.95049	8.79524	7.96377	8.86169	7.26299	7.6029	8.22428	9.26844	8.02804	8.4815	7.99643	9.01379	7.93652	8.69937	8.09951	7.73273	8.48431	7.77785	7.47113	7.46771	6.17033	6.78983	8.05523	7.82584	7.88343
HNRNPK	0.67027	0.000400499	0.00376321	12.2256	11.5553	12.0517	12.0484	11.6366	12.0775	12.4214	12.426	12.1051	12.0947	12.3308	12.4607	12.3171	12.3453	12.1718	12.121	12.4996	12.2009	12.5432	11.5284	12.5707	12.3235	12.1795	11.5212	11.5124	10.8174	10.9839	12.2177	12.2792	12.5083
HNRNPLL	0.856002	0.0020997	0.0126875	8.42309	7.56709	8.45959	8.47696	8.22699	8.74587	8.39666	7.42497	8.78157	8.57682	7.9816	7.61803	8.80764	9.23266	9.33375	8.82197	8.12574	8.42896	8.496	7.18346	8.3923	8.44836	8.74934	6.78615	7.57832	6.88129	7.33624	8.45542	8.36514	8.59882
HNRNPM	0.781695	0.00476872	0.022646	10.1545	9.37278	10.3063	10.5999	9.61863	10.6348	9.54018	9.19679	10.4411	9.85786	9.81251	9.73256	10.7224	10.4402	10.5034	10.1231	9.91133	10.1497	10.9021	9.72218	10.1592	10.2222	10.4348	9.07516	9.32368	8.30515	8.54924	10.34	10.6435	10.3673
HNRNPR	0.799874	0.000204658	0.00228712	10.7323	9.93238	10.9639	10.8147	10.0057	10.5708	10.4172	10.8189	10.6358	11.0567	10.4873	11.0759	10.9109	10.9914	11.0356	10.4535	10.8572	10.5432	10.8765	10.0595	10.4253	11.3911	10.6048	9.71167	9.98693	9.21246	9.40072	10.6023	10.6802	11.1138
HOMER2	2.39065	2.27835e-08	2.13642e-06	7.61041	5.21975	7.52889	7.84886	8.53572	7.86535	7.62636	8.35199	7.80703	7.54442	8.11726	6.67817	7.94696	7.83259	6.27354	7.92904	5.90089	8.85841	6.94571	6.72239	8.33896	6.75221	8.07628	4.56465	5.09549	5.48361	4.95329	5.55732	5.66417	7.94794
HOMER3	0.875969	2.48411e-05	0.000453241	7.25007	6.3741	7.12846	6.99658	7.87922	7.26815	6.95757	7.00196	6.93089	6.97304	7.05136	7.15549	7.90591	7.11284	6.99892	7.73826	7.53902	7.87024	6.76322	7.23036	7.36234	7.36007	6.99006	6.02654	6.04641	6.08022	6.03195	6.99944	7.06007	7.28762
HOOK1	1.22026	0.000155041	0.00184565	8.47119	7.25092	8.93509	9.06308	8.22162	8.42322	8.07874	7.99789	7.63357	8.56411	7.77598	7.72479	7.57184	8.62591	8.70153	8.55551	8.2905	8.76497	9.15211	7.74219	9.04093	9.68845	8.5965	6.79106	6.37123	6.84667	7.16007	8.51972	7.81678	9.21757
HOXB3	1.75465	0.00813584	0.0327668	8.57978	6.82513	6.65696	9.20706	8.74257	8.77115	9.73772	10.1063	7.42201	6.95489	8.75531	9.38425	10.2704	10.1979	7.09705	8.43009	5.5966	10.7462	9.90684	7.31982	8.90211	6.2362	8.23076	6.04524	5.84315	6.88549	5.9901	8.68965	7.49715	10.083
HPDL	1.49932	2.5243e-05	0.000457654	6.13513	4.63581	6.11503	6.0268	6.75711	6.64815	5.478	5.95424	5.65912	6.01185	6.42001	4.93635	6.27861	6.47687	8.36909	6.72864	5.46473	5.6099	5.78158	5.20356	6.10206	7.29408	5.80497	4.60414	4.79512	4.55434	4.45404	4.82503	4.58217	5.85214
HPRT1	2.05429	1.40301e-07	8.45125e-06	10.168	8.11366	9.36077	10.4535	9.50718	10.3693	10.6981	10.5785	9.73819	8.99811	10.4263	10.4978	9.78089	10.9986	10.4377	10.8442	10.8028	9.21558	8.63464	11.3664	10.0388	10.3841	10.1176	8.1983	8.19737	7.69905	7.28066	8.86169	8.44491	10.446
HPS3	0.710695	0.00736717	0.0306085	8.02556	7.31486	8.1806	8.02555	8.13633	8.2189	7.4172	7.92434	7.72414	7.11204	9.26376	7.57715	8.05995	8.97093	8.25997	7.60532	8.31025	7.89853	7.76475	8.12795	7.68887	8.7332	7.57215	6.9832	6.83653	6.6317	6.99168	8.25671	8.18934	7.99036
HPS6	0.65576	5.73516e-05	0.000875211	7.05735	6.40159	7.00572	7.53022	7.53251	7.1339	6.66954	6.58164	7.28271	6.71086	7.23219	7.00253	7.17813	7.24357	7.06405	7.14872	6.80808	7.13162	6.69496	6.87411	6.73972	7.3889	7.35951	6.22446	6.34158	6.19914	6.05116	6.69005	6.90317	6.9486
HRAS	0.745756	0.00597735	0.0265145	7.63062	6.88487	7.3304	8.01394	8.46892	7.84739	7.67963	7.12155	7.76935	7.97139	6.79518	6.52838	7.68503	8.34634	7.7876	8.485	7.0977	7.89178	6.96337	7.68491	7.14808	8.32354	8.2267	6.72155	6.84059	6.64356	6.36769	7.28629	7.44954	6.70759
HRH1	0.851631	0.0394958	0.0970951	7.11419	6.26256	6.27718	8.94882	6.74832	6.33564	8.1872	7.22445	7.39032	5.66452	6.7848	9.02491	6.13193	7.46326	7.8031	6.13856	5.8611	8.8223	6.27588	7.51513	7.14635	6.88129	6.52658	6.59236	6.09153	5.99842	5.86846	6.47356	6.55104	7.36061
HS6ST1	1.65001	2.09846e-07	1.17391e-05	7.78489	6.13488	8.31773	7.38547	8.12518	8.06247	7.12105	7.46045	8.30016	6.86336	7.60532	7.49977	8.35156	8.76256	7.97457	7.68295	6.83493	8.17482	8.09558	6.69645	7.83372	7.8732	7.5486	5.85233	5.98118	5.98282	5.94931	6.19749	6.84613	8.6977
HSD17B1	0.806542	0.00825588	0.033064	6.72984	5.9233	7.05943	7.24105	7.36209	6.68543	6.42166	6.05674	7.4108	6.06742	7.87613	5.32874	7.74132	6.13899	7.34943	6.76679	6.51597	6.2605	6.15084	6.67796	5.92717	7.08769	7.20055	5.41974	6.00869	5.52978	5.42372	6.30775	6.85013	6.72985
HSF1	0.998293	0.000616015	0.00516848	6.37323	5.37494	6.5571	6.44206	6.77993	6.57174	5.71814	5.86639	7.23843	5.54294	6.13436	5.52994	6.71488	6.7122	7.29765	6.79185	5.85932	6.56504	5.61802	6.36917	5.45061	7.19042	6.88447	4.6973	5.25315	4.91389	5.2517	6.03131	6.10229	6.37644
HSP90AA1	1.06201	3.43077e-07	1.70273e-05	13.119	12.0569	12.9791	12.9508	12.712	12.9563	13.1331	13.2678	13.2205	12.8726	12.903	13.7725	13.1111	13.5184	13.0996	13.0326	13.4335	13.1768	13.0402	12.4171	13.4834	13.1331	12.97	11.7714	11.842	11.6562	11.6854	12.799	12.5876	13.4335
HSP90AB1	1.13899	2.6231e-05	0.000469981	11.5718	10.4328	11.6451	11.421	11.4349	11.9292	11.5332	11.2206	11.3893	12.6301	11.3257	11.2092	11.3235	11.7111	11.439	11.4661	11.9756	11.2317	12.426	10.9972	12.2087	11.1699	11.4119	9.77799	10.8677	9.71295	9.82257	10.8852	11.5304	11.4802
HSP90B1	1.05254	1.04776e-05	0.000233312	11.4578	10.4053	11.3235	11.0552	11.051	11.4474	11.9327	10.9939	11.7876	11.7811	11.4272	11.1027	11.7633	12.0637	11.18	11.2432	11.1298	10.591	11.8225	11.0426	12.2471	11.5009	11.4573	10.237	9.895	10.3114	10.2093	11.1108	10.6683	12.1286
HSPA13	0.695143	0.0227024	0.0654937	8.07584	7.38069	8.02992	7.37763	7.97104	8.68582	6.60757	7.71574	7.98028	8.83017	7.5165	7.88129	9.95607	8.62854	7.39641	8.61428	8.1948	7.88223	7.72789	8.32191	7.57764	8.16089	8.21585	6.97806	7.10073	6.81357	7.4041	8.35944	7.62824	8.39589
HSPA14	0.740934	2.82551e-05	0.000499209	8.35882	7.61788	8.52955	8.21358	8.10852	9.06065	8.09937	7.77966	8.34046	8.08905	8.01507	8.1963	8.51343	8.44686	9.13203	8.16695	8.49675	8.16168	8.27996	8.00515	8.66745	8.92587	8.43294	7.58918	7.45055	7.70161	7.60356	7.72699	7.63541	8.23272
HSPA4	1.6248	2.32129e-07	1.26155e-05	9.01715	7.39235	9.30972	9.08389	9.38787	8.77154	9.20475	7.72278	9.17242	8.92075	9.14157	9.21041	9.36154	9.30245	8.80655	9.83468	8.63844	8.18874	8.77985	8.47804	8.83525	9.20226	9.77684	7.51859	6.71478	6.77331	6.95585	8.56426	7.82733	9.24706
HSPA9	1.11605	0.000255894	0.00269438	9.28652	8.17047	9.57682	10.0998	9.18704	9.01909	9.34463	7.87208	9.55502	8.76298	9.23762	9.43061	9.47093	10.3318	8.55942	9.61044	8.86926	8.16902	8.95423	9.17028	9.28318	10.2704	9.895	7.91136	8.17482	7.57832	7.78959	8.8291	8.73964	9.63379
HSPB1	1.3188	0.00285203	0.0157848	11.2182	9.89943	9.8311	11.7811	11.9518	11.279	10.7682	11.3505	12.605	10.035	9.87154	10.5963	9.99258	11.8206	11.962	12.9977	11.5968	12.3308	10.3254	10.0725	11.2187	11.8225	12.0667	9.08001	10.1741	9.20627	9.69298	10.246	10.9972	10.5252
HSPB11	0.957803	0.0027006	0.0152411	9.4226	8.4648	9.63231	9.5016	8.93064	9.87154	8.85553	8.91979	9.94908	8.96963	9.67195	10.1347	7.68802	9.60039	10.218	10.2575	9.57608	9.52174	8.36476	9.0706	9.25699	9.97004	9.50986	7.84762	8.53656	7.84591	7.81117	9.37043	9.37709	9.82641
HSPBP1	1.23134	1.5084e-05	0.000308145	7.71894	6.4876	8.37515	8.21418	7.70482	7.62274	6.95381	6.75604	7.77193	7.66178	7.9998	6.97225	8.27509	7.60012	7.91992	7.47064	6.88232	8.66674	7.79642	7.34364	7.21168	8.13938	8.25671	6.21672	6.38744	6.02349	6.10149	7.07578	7.12068	8.22162
HSPD1	1.80176	2.88071e-10	5.99188e-08	11.0209	9.21915	10.8347	11.1456	10.4933	10.5858	11.1332	10.9972	11.1473	11.2057	11.3745	11.1391	11.1614	11.2455	10.9839	10.8866	11.4531	10.581	11.2455	10.5534	11.1156	11.0372	11.1614	8.62393	9.02435	8.6495	8.60471	10.294	10.1184	10.9787
HSPE1	1.61842	4.23154e-10	8.275e-08	12.0828	10.4644	11.9549	12.2131	11.8321	11.8628	11.8888	12.0667	12.3171	11.8262	12.4607	12.2264	12.2746	12.0912	12.1244	12.0244	12.4607	11.8354	12.2792	11.4186	12.2601	12.0839	12.2424	10.0548	10.6564	9.77073	9.76427	11.3102	11.2298	12.0775
HSPE1-MOB4	1.55941	2.42512e-09	3.46792e-07	10.4734	8.91395	10.0742	10.3565	10.394	10.3891	9.76543	10.3685	10.3543	9.83027	10.9337	10.4162	10.6214	10.7946	10.9109	10.738	10.591	11.0681	9.91354	10.2399	11.1982	10.218	10.6099	8.77826	8.9045	8.34762	8.5677	9.48029	9.40534	10.6284
HSPG2	0.872471	0.00123161	0.00857036	6.74286	5.87039	7.23769	6.95957	6.58614	7.41787	5.75154	6.86093	7.24357	6.81805	6.30136	6.28211	6.68533	7.05257	7.0035	6.42523	6.14623	6.74514	6.3022	6.70401	5.75301	6.99049	7.08038	5.08431	5.65628	5.64246	5.76229	6.52321	6.5538	7.99609
HSPH1	1.19014	4.64896e-06	0.000125286	8.55159	7.36145	8.39085	9.15338	8.84642	7.86472	8.71888	8.15103	9.52602	8.25019	8.49911	7.65912	9.1874	8.81855	8.75142	8.91456	8.70496	8.37808	9.01379	8.4353	7.93004	8.99166	7.98359	7.08825	7.09332	7.21226	7.35907	7.91008	7.5057	7.96584
HYAL2	0.797226	0.0271218	0.0743825	8.11155	7.31432	8.25714	8.19513	8.95769	8.9451	7.72225	7.34722	8.5094	7.67343	6.95771	6.44206	9.03929	8.4422	8.53204	9.50856	7.73766	8.4655	8.41298	7.38613	7.20682	7.78092	9.25649	6.77846	7.86889	6.30737	7.08059	8.00048	7.85015	7.67841
HYAL3	1.5499	0.000650262	0.00538278	6.49649	4.94659	7.52623	7.11225	6.74415	7.46258	5.8598	7.17813	7.02353	5.16773	6.0872	5.71143	5.87407	8.31581	8.46302	7.81237	5.60405	6.186	4.90549	5.56692	5.36639	6.3037	6.41688	4.57088	4.63859	4.77913	4.92256	5.14081	5.62753	6.23501
HYLS1	1.56026	0.00190231	0.0117858	8.57746	7.0172	9.61226	8.9359	8.81243	9.41655	7.02404	8.78448	9.26106	7.32857	7.17902	7.88738	8.24449	6.9725	10.7833	9.62521	7.28676	9.09697	6.94068	8.70447	9.27265	9.0663	9.73284	6.80889	6.56578	6.58937	6.01953	8.1651	7.95455	8.73638
HYOU1	1.17485	4.34666e-05	0.00069987	8.66612	7.49127	7.9644	8.48268	9.29114	8.98349	8.13739	7.70482	8.86116	8.45721	8.37159	8.12687	8.7155	8.83819	9.428	8.98124	8.12518	9.69221	7.5932	8.47114	8.77675	9.77423	8.97653	7.07697	7.51171	7.79507	7.34755	7.68998	7.52634	8.90164
HYPK	0.671147	0.000454387	0.004119	10.5955	9.92434	10.4953	11.0018	10.478	10.5345	11.03	10.3467	11.1849	10.7997	10.8535	10.5464	10.9939	10.5085	10.568	10.5345	10.3411	11.0787	10.1224	9.85708	10.4435	10.5406	10.6284	9.70273	9.96909	9.51526	9.4082	10.3182	10.6326	10.2131
IAH1	0.595759	0.0157261	0.0512554	9.10796	8.5122	8.88545	8.63205	8.98717	9.5233	9.56857	9.83027	9.60338	8.65784	9.68196	9.71481	8.01664	9.21865	8.65384	9.98362	8.72708	8.94045	8.38667	9.15741	9.51526	8.56548	9.37043	8.16198	8.44355	8.24186	8.09128	9.05218	9.08236	8.75483
IARS2	0.649028	0.00264098	0.0149824	11.225	10.576	11.2405	11.4139	10.8677	11.1043	11.2576	11.3873	10.8984	10.6952	10.1347	10.8968	11.5968	11.5212	10.8311	11.8066	11.4621	10.738	11.5482	10.944	11.9518	11.7839	11.602	10.6904	10.3203	9.90761	10.7488	10.8795	10.9094	11.2688
ICE1	1.15585	3.51846e-06	0.000100628	10.9288	9.77298	10.9094	11.3788	10.8699	11.2866	10.1289	11.2714	10.9387	10.3756	10.6253	10.3467	11.0702	11.0236	10.7782	10.8489	11.2806	10.6765	10.9576	10.8334	11.0974	11.3893	10.6909	9.51169	9.56791	8.89402	9.5824	10.7439	10.338	11.6562
ICMT	0.960042	0.000183544	0.00209974	7.7661	6.80606	7.70161	8.00477	7.56027	7.8077	6.85378	8.10342	8.19371	7.17134	7.15929	7.80802	8.78384	7.79189	7.91832	7.85045	7.69574	8.51595	6.9042	7.80462	7.36466	8.29167	7.73947	6.66743	6.69577	6.20657	6.3195	7.63801	7.30909	7.82957
ICT1	1.32768	7.16237e-05	0.00102294	8.72732	7.39964	9.16884	8.40386	8.82075	8.63065	8.66992	8.93419	9.41387	8.56176	9.35986	8.21452	8.9447	8.47885	9.31812	8.60338	8.57884	9.06065	7.73721	9.62301	6.88158	8.70717	9.46865	6.92068	7.27723	6.84039	6.70975	8.3101	8.33969	8.42069
IDH2	2.52469	3.05863e-09	4.19051e-07	8.57153	6.04685	7.82012	7.52389	9.12731	8.47078	9.21757	9.84511	9.38545	8.36476	9.24557	8.63737	8.53884	9.34049	7.7583	8.59615	9.25819	9.01313	7.41587	8.21924	7.46793	8.38143	9.41711	6.09325	5.68635	6.03052	6.24726	6.13193	6.09177	7.52911
IDH3A	0.652228	0.0210421	0.061962	7.54191	6.88968	7.25408	8.025	7.61483	7.32666	7.66459	7.12347	8.65502	6.25493	7.47874	8.018	8.54307	7.73766	7.76616	7.22608	6.90506	7.55349	6.28389	8.53036	7.50296	7.51311	7.88096	6.70286	6.69444	6.35171	6.68504	7.55929	7.34472	7.0638
IDH3B	0.900266	0.00362503	0.0186635	10.1048	9.20457	10.7074	10.246	10.4553	10.8732	9.50986	8.62762	9.92222	10.5007	10.1158	9.20534	9.33659	9.96537	9.84752	10.7439	9.96909	9.57877	10.4472	9.36678	10.2271	11.8028	10.7962	9.63161	9.36354	8.84042	9.02239	8.96537	9.40409	10.0618
IDO1	1.12989	0.046339	0.108198	7.58967	6.45977	9.75553	7.43289	7.62519	7.45779	10.3514	6.29611	6.92836	6.55985	7.95756	9.58562	5.90914	7.36525	6.48788	7.30125	7.42388	8.68423	6.12614	9.63774	6.20396	7.21179	8.62809	6.07882	7.8744	6.59012	5.96572	6.17854	6.07101	6.04295
IER2	0.851968	6.05288e-05	0.000907301	12.3508	11.4989	12.712	11.9967	12.3978	12.426	12.0244	13.0813	11.7588	12.1244	12.712	12.4711	12.4554	12.5311	12.1484	12.0325	12.7721	12.6479	12.4996	12.6243	11.8262	12.1484	11.9068	10.9939	10.9423	12.1559	12.1443	11.1982	11.5586	12.4214
IER3IP1	0.684703	0.0042133	0.0207319	10.0637	9.37903	9.28219	9.63834	9.69073	9.99399	10.3543	9.91354	11.1172	9.43128	10.752	9.81388	9.91922	10.5477	9.80352	9.7075	10.0787	10.1697	10.2903	9.22254	9.93717	10.6099	10.7845	9.07196	9.41987	9.08707	8.91603	9.86625	9.91299	10.3439
IER5L	1.68325	0.000245069	0.00261285	8.36786	6.68461	8.91924	7.53342	9.2815	7.49519	8.55209	9.58904	8.02303	6.76054	8.81273	7.86045	7.66068	8.73458	9.29114	8.0622	10.4495	9.15107	8.29813	6.92836	6.79803	8.43398	9.33809	6.06276	6.48242	5.92695	6.74354	7.54085	7.35117	8.11994
IFI27	2.44593	0.00115771	0.00822367	12.0034	9.5575	12.7552	12.6855	13.4335	13.5725	13.1111	11.4933	12.9563	10.1184	12.7721	13.0402	8.80838	13.2072	10.4892	13.1967	10.9045	12.583	7.43521	11.9786	10.7298	13.1652	13.2941	10.0037	9.5	9.6712	8.02741	11.3445	8.79821	12.3453
IFRD1	0.781172	0.0215552	0.0631072	8.64984	7.86866	7.16496	8.40573	7.82746	9.0527	8.56496	9.27265	8.83197	8.78517	6.81825	9.58047	8.26509	8.91687	8.8761	9.83619	9.08764	9.47045	8.18839	9.44685	9.00366	8.30996	8.14665	7.5516	7.66141	7.29108	7.47354	8.36205	8.8723	8.44422
IFT57	1.1277	5.3387e-05	0.000824221	8.84388	7.71619	9.03014	8.89857	9.25986	8.66858	9.22964	8.06588	8.52096	8.87744	8.62174	8.38392	9.23722	9.06488	9.74526	8.91645	8.21195	8.77069	8.70014	8.23175	9.58701	8.77796	8.12994	6.85036	7.94115	7.18692	7.40488	8.67195	8.24186	9.63545
IFT81	0.628945	0.0165229	0.0528364	7.58214	6.95319	7.48324	7.52049	6.69426	7.54288	7.18591	7.19243	6.90292	8.5094	7.6044	6.86691	7.71448	8.37623	7.91669	7.65506	7.46661	6.96065	8.69421	6.70962	7.9307	7.66491	7.75965	6.52815	6.75368	6.8471	6.94291	7.71106	6.93627	8.45542
IGFBP2	1.36732	0.0295093	0.0788385	8.18612	6.8188	9.35551	6.70691	8.57275	10.1532	6.26465	7.62812	7.92822	8.85301	6.72645	5.64645	9.50856	8.64074	8.31883	9.96044	10.0658	6.92257	9.68464	5.88805	6.86067	8.40367	9.09867	5.26314	6.07997	6.23879	7.82349	7.36892	8.13849	8.90681
IGSF8	0.869651	0.017669	0.055192	6.45118	5.58153	6.22735	6.55985	6.92763	7.58566	5.37819	5.41122	6.96535	5.48958	5.78032	5.35573	6.59998	6.60682	7.39852	7.94211	5.69352	6.45308	6.08207	6.48413	5.66899	7.30171	7.14138	4.82487	5.4107	5.01421	5.06554	6.4481	6.72578	6.87286
IKBIP	1.15319	0.0111985	0.0408123	6.32135	5.16815	6.55398	6.21413	6.08077	7.45478	5.12772	5.47368	7.11325	5.0233	5.36723	5.67603	6.94839	7.5558	7.85795	7.4488	4.96841	5.90627	5.52021	7.25495	6.16371	5.27307	6.10601	4.67051	4.51164	4.5677	4.92501	6.82296	5.51111	7.98121
IKZF2	0.861002	0.00206747	0.0125474	6.64012	5.77912	6.40986	7.17539	6.12333	6.37191	6.79331	7.12221	6.88447	5.7892	5.56093	6.72849	6.58614	6.55086	6.2939	6.41679	6.90768	7.89143	5.54332	6.90941	6.33319	7.04031	7.31919	5.59175	5.31973	5.53172	5.45688	6.42069	6.35397	7.33139
IL17RE	0.601457	0.0171224	0.054021	5.83353	5.23208	5.67268	6.99892	5.99649	6.04648	5.24814	4.95618	6.37271	5.96178	5.525	4.94739	5.89577	6.43018	6.15664	6.15166	4.90596	5.85964	5.54987	5.78679	5.00194	6.35966	6.46745	4.99245	5.57341	4.74649	5.12981	5.50315	5.44715	6.04641
IL1RAP	0.775164	0.0141967	0.0477511	7.94868	7.17352	7.23714	6.7469	8.14521	7.85449	7.10588	9.11252	7.68834	7.5486	7.89352	7.56113	8.41628	9.38284	8.51343	6.83083	8.6068	8.11099	8.11277	7.12392	8.38981	8.54938	7.35244	7.09815	6.68227	7.71106	7.26191	7.46308	6.82464	8.58777
IL32	1.0217	0.00172181	0.0109827	6.53459	5.51289	5.91204	7.13996	7.27131	7.61618	6.42758	6.13918	6.5463	5.75097	6.68756	5.78411	6.46255	6.2434	6.29462	6.54758	6.58263	5.81924	5.47808	8.8017	6.54471	6.07846	7.06643	5.29896	5.64884	5.52564	5.2949	5.75896	5.55005	6.56645
IL4I1	2.39193	3.77798e-05	0.000627743	8.14338	5.75145	7.88284	7.23714	8.5404	8.46197	8.59764	8.57682	10.3565	6.41834	8.85301	5.73122	7.57559	6.90126	8.65848	9.05491	7.51333	9.60104	7.11596	7.50218	9.55281	6.63191	10.2657	6.51927	5.62144	5.93896	5.23098	5.59477	5.60328	8.12518
ILF2	1.40414	3.71553e-06	0.000105082	9.81956	8.41542	9.45251	10.1026	9.92787	10.4239	9.0527	8.57535	9.7339	10.4032	9.8526	9.21185	10.0215	9.49668	10.6637	10.4714	9.81594	9.72069	10.5873	9.75593	9.99924	9.50538	10.244	8.00282	9.04383	7.85699	7.9195	8.741	8.92839	9.01211
ILKAP	0.626616	0.0168699	0.0535862	9.1388	8.51218	9.39026	9.14716	9.18794	8.84165	9.10321	8.32052	9.31195	8.65333	8.65682	8.29631	9.8274	9.72912	9.42163	9.72371	8.32975	9.49352	9.0424	8.65915	9.29435	9.50103	9.66346	7.88431	8.44292	7.99212	7.82298	9.31994	9.61082	9.45887
ILVBL	1.44158	4.96629e-05	0.000778175	8.57089	7.12931	8.20407	9.75266	8.91742	9.15446	7.73414	7.41219	8.88973	7.65541	7.41953	8.0714	8.98298	9.36504	8.61384	9.30385	8.1166	8.48431	8.1249	8.40146	8.61756	8.91924	10.0559	7.23789	6.75417	6.4609	6.94181	7.5888	7.79226	8.36281
IMMP1L	0.707159	0.0127869	0.044646	8.29478	7.58762	8.11173	8.87885	7.69816	7.99725	7.23986	8.93908	8.62762	8.3915	8.58447	7.10665	8.44076	9.20987	9.36077	8.84121	7.64209	8.30765	7.96106	7.5316	7.84607	8.56087	9.28578	7.29478	7.4488	7.57312	7.3583	7.80586	8.04485	7.92222
IMMT	0.892732	0.000962315	0.00720241	10.3159	9.42317	10.5419	10.432	10.0673	11.1595	9.98838	10.046	10.5447	10.4329	9.7397	10.446	10.6536	11.122	9.44562	10.297	9.7339	10.1853	10.0849	10.2082	9.63073	11.0018	10.8624	9.03531	9.18426	8.93671	8.61589	10.3649	10.4019	10.326
IMP3	0.612631	0.0470555	0.109359	7.00304	6.39041	6.67502	7.86733	7.03103	7.31545	7.47456	6.21172	8.19065	6.10689	6.37454	6.59647	7.5181	7.39136	7.49158	7.13336	6.16666	7.51678	5.81411	7.27418	6.79106	6.96705	7.49	5.5722	6.46428	5.77652	5.80901	7.2444	7.47606	6.66902
IMP4	1.1701	1.45371e-05	0.00030073	8.40666	7.23655	8.7836	8.9941	8.85471	8.61028	8.02867	8.12687	8.69075	7.77193	8.00453	8.23752	8.56176	8.54151	9.22668	8.741	7.89538	9.21185	7.34904	9.05078	7.89178	8.12795	8.23718	6.90126	6.94014	7.08143	6.89481	7.7587	7.84297	8.00855
IMPA2	1.08732	0.00708924	0.0297291	8.18041	7.09309	7.57239	8.17898	8.5677	7.55726	7.15685	7.11126	9.0527	7.20506	7.88685	8.01394	7.07628	9.21041	8.55471	8.6123	8.89953	7.98057	8.08072	9.81251	7.59711	10.5583	7.92192	6.8686	6.89388	7.19802	6.37644	7.53423	7.68737	7.3618
IMPAD1	1.30642	2.44744e-05	0.000448338	8.62033	7.3139	8.29673	8.55299	8.23938	8.93908	7.91008	8.04668	8.60512	7.96202	9.2678	8.05426	9.38673	8.67315	8.65212	9.18006	8.06966	9.51318	8.53884	8.04595	8.28754	8.89003	9.2383	6.94291	6.9075	6.64588	6.83458	8.58513	7.96742	9.29748
IMPDH1	1.7936	0.000592714	0.00503202	8.51329	6.71969	8.08391	9.43231	9.73313	8.80207	8.03154	8.96614	9.40409	7.02807	8.22534	8.59921	7.54574	10.1269	9.72555	7.96935	7.08625	10.3543	6.85235	10.0696	7.07863	8.63388	7.67476	7.1977	6.13534	6.60817	5.37008	7.34664	7.66021	7.86923
ING1	0.610271	0.0151552	0.0499499	7.89861	7.28834	7.65655	8.58513	7.65692	7.9924	7.0362	7.23836	7.25773	8.52657	8.2189	6.92201	8.30576	8.05303	8.64235	7.84358	7.72789	8.76625	7.90534	7.58681	7.59067	8.88113	7.76338	6.82327	7.3024	6.95935	7.24336	7.56027	7.84137	7.61244
INHBA	1.36813	0.0455176	0.106937	6.45172	5.08359	6.318	4.99445	7.93102	9.34517	4.87184	5.82856	9.34049	5.44041	4.73501	8.56035	5.91562	7.50269	7.45027	4.49376	5.20658	6.86961	4.59955	9.00965	4.18032	5.80818	6.9053	4.52793	4.94009	5.28026	5.20595	4.49908	6.04825	6.6311
INHBB	2.48454	0.000289753	0.0029583	8.51155	6.02701	9.92964	7.22751	9.61412	8.20362	7.77785	9.2979	9.18794	5.58985	9.27595	10.8248	8.8761	10.5214	9.86327	8.95643	6.75407	9.18896	6.72932	6.62076	9.17618	8.44181	5.81642	5.56851	5.95689	7.30155	6.37727	5.07981	5.87804	9.38024
INHBE	0.761394	0.00273114	0.0153742	4.77805	4.01666	4.86866	4.66786	4.43503	6.2814	4.40942	4.12022	4.46443	4.6292	4.71369	4.19325	5.47229	4.97773	4.4203	5.05659	4.21195	4.71202	4.56954	4.79743	4.22173	4.62102	5.99225	4.23626	3.91416	3.80594	3.70394	4.21898	4.22068	5.28116
INO80E	0.595716	0.044437	0.105207	6.34941	5.75369	6.9389	6.30866	6.50607	6.59821	5.57196	5.5626	6.02726	6.23245	5.96449	5.57751	6.58863	6.67101	7.32293	7.10491	5.7051	6.91788	5.17142	6.84159	5.48644	7.0384	6.5755	5.19875	5.34268	5.57935	5.2095	6.53879	6.6531	6.97512
INPPL1	1.47061	2.50185e-05	0.000455026	8.30036	6.82974	8.64103	8.58199	8.1153	8.64103	7.8025	7.83295	8.67026	7.4549	9.428	8.14585	7.49715	8.60972	9.5815	8.27906	8.28083	8.75142	7.54186	6.99254	7.48381	8.87958	8.82421	6.60703	6.44621	6.25176	6.39413	7.51369	7.76564	8.57237
INTS2	0.705189	0.0204943	0.0607789	7.57658	6.87139	7.93319	6.56229	7.98295	7.98262	7.06578	7.65541	7.95689	8.20115	7.19381	6.07944	8.2463	7.64601	7.85015	7.33718	7.84799	6.42915	7.89585	7.705	7.05586	7.36577	8.741	6.32919	6.53579	6.19749	6.80447	7.78528	7.57609	7.95088
INTS5	0.627583	0.000247279	0.00263273	7.94791	7.32032	8.12208	8.06588	7.74021	7.94758	8.13633	7.79986	8.02466	7.32927	7.8962	7.80226	7.61003	8.55168	8.5307	8.25853	7.55116	8.19945	7.47903	7.50713	7.81499	8.30796	8.31139	7.30139	7.34766	7.36983	6.93236	7.43268	7.53802	7.86756
INTS6	0.873773	0.00874811	0.034403	7.29492	6.42115	7.281	8.17037	6.98446	7.27518	7.21737	6.66004	6.66293	6.37381	6.67969	6.21541	6.9486	7.79276	8.11456	7.23234	6.81593	8.66512	6.91432	6.95489	7.68182	8.68906	7.82381	5.67448	6.04092	5.79735	6.38022	7.54652	7.08739	7.33477
INTS8	0.62403	0.00551662	0.0250835	9.11654	8.49251	8.65962	8.94675	8.98548	8.58745	8.77675	9.21558	10.0537	8.81389	9.6958	9.54849	9.04383	8.99219	9.60271	9.4503	9.01873	9.73104	8.77115	8.08949	8.78606	8.93228	9.81532	8.38177	8.44883	7.94154	8.34699	8.95517	8.88075	9.04726
IPMK	0.961535	0.000991848	0.00736085	6.61929	5.65775	6.56999	6.91815	6.68598	6.15942	6.8512	6.91652	6.80108	5.51445	6.29085	6.43033	6.38315	7.12784	7.01166	7.30674	6.63806	6.69107	6.69594	6.38698	5.1734	7.14281	6.90628	6.98082	5.01268	4.83552	5.15503	6.23354	5.72891	7.02239
IQCD	1.18831	0.00282783	0.0157049	6.46194	5.27363	6.36346	4.91084	5.83406	7.2086	8.39121	6.9136	5.38018	6.02632	6.37975	5.22492	5.94485	7.87056	6.5828	7.85872	7.07744	5.52376	6.1216	5.84912	6.69878	7.48929	6.34882	5.07362	5.3588	5.39948	5.26139	5.03694	5.51156	6.1641
IQCK	0.587903	0.0321131	0.0840289	7.17514	6.58724	7.48674	6.63761	6.2158	7.06269	6.70575	7.28858	6.55687	7.31018	6.92965	5.72134	8.56356	7.06142	7.93906	7.19633	7.5622	7.16595	6.73557	7.76383	6.86346	7.54706	7.63514	6.28525	6.52399	6.44683	6.32578	7.02343	6.91815	7.90429
IRAK1	1.79639	0.000121232	0.00154443	10.4827	8.68628	10.8503	11.0483	11.0407	10.3921	11.2776	11.1816	11.4548	8.8233	10.3685	11.0499	9.25314	11.4293	10.9695	10.7819	9.93492	10.9898	8.48225	12.0517	8.90078	11.1027	9.61803	8.39014	8.49191	8.27438	8.11294	9.4556	9.39273	9.61746
IRAK2	1.19744	0.00279051	0.0156092	6.2356	5.03816	5.23177	5.86936	6.03656	6.4341	7.44954	6.11937	6.3894	5.36926	6.59178	5.53771	6.38988	6.04581	6.32724	8.36514	6.51826	5.53512	5.10441	8.59113	5.76191	6.48572	5.20498	5.12912	4.81374	5.03159	4.85006	5.24052	5.16394	5.8248
IREB2	0.714498	0.0126645	0.0443539	7.79846	7.08397	7.4166	8.2489	7.39976	7.49977	8.74639	7.90498	8.74681	7.35387	7.57322	7.89672	8.76864	7.93582	7.22156	6.94544	7.41953	7.40979	7.76512	7.50161	7.81609	7.76093	8.03178	6.87807	6.75906	6.01381	6.48848	8.12421	8.24015	8.20288
IRF2BP2	1.32726	2.94174e-06	8.82997e-05	10.74	9.41277	10.5524	10.4647	10.4	10.804	10.4624	11.3609	10.7845	10.7962	10.515	10.6967	10.2979	11.8321	10.6128	10.4103	10.6237	11.2726	11.1298	9.65254	10.9605	11.2405	10.5487	8.81389	9.51432	8.92115	8.79144	9.93914	10.4967	10.8624
IRF2BPL	0.942727	4.19735e-05	0.00068062	13.0198	12.0771	13.0255	13.0628	12.8171	12.9271	13.2941	12.8948	13.1433	13.2807	13.1433	13.5285	13.3651	13.4046	12.5266	12.3308	13.0558	12.9563	13.2205	12.2601	12.1757	13.4335	13.1859	11.8696	11.9891	11.3911	11.7132	12.6922	12.8075	13.4046
IRF3	0.821824	0.001071	0.00778911	8.67586	7.85404	8.8993	9.37709	8.91924	8.44181	8.39197	8.04199	8.86702	8.12421	9.04339	8.66388	8.25821	8.63205	9.44045	9.16144	7.96884	9.64876	8.21724	8.52811	7.66366	8.77893	8.92314	7.74195	8.01235	7.281	7.47966	8.03506	8.57421	8.87821
ISG15	2.74614	0.000212514	0.00234329	10.4932	7.74711	11.6537	11.0153	12.5927	12.6922	9.55998	8.57461	11.276	9.22254	11.1539	10.7427	9.91797	11.5387	8.92766	10.7311	8.63552	12.1443	5.89675	12.0738	9.46997	11.5873	11.3788	7.92613	7.94211	7.33948	6.98609	8.60942	7.67941	10.0658
ISG20L2	0.736128	2.47128e-06	7.72445e-05	8.44779	7.71167	8.36131	8.55509	8.33684	8.43095	8.66594	8.06279	8.56035	9.01379	8.60942	8.23206	8.32909	8.37356	8.95073	7.98872	8.15588	8.37159	8.65848	8.10057	8.61985	8.82474	8.35342	7.7093	7.692	7.96164	7.72305	7.47113	7.71287	8.29631
ISOC2	0.74719	0.012367	0.0435845	6.8848	6.13761	7.5138	7.8439	7.11883	7.0349	5.80064	5.86454	7.22337	6.08068	6.81197	6.15951	6.65437	6.73385	8.1872	6.71776	6.36117	7.78577	6.32275	7.06166	6.15399	7.55029	7.42527	5.65374	6.20887	5.74178	6.45228	6.65067	6.11834	7.05943
ISY1	1.03982	7.01323e-05	0.00100667	7.39965	6.35983	7.62081	7.5322	7.83798	7.5824	6.72382	6.51947	7.30851	7.15127	7.73974	6.92907	7.76902	8.3273	7.96782	7.54744	6.62982	7.47327	7.9029	6.9628	7.00056	7.91258	6.89341	6.30833	6.20741	5.78001	5.88796	6.95684	7.01843	7.4602
ISY1-RAB43	1.13284	0.00990604	0.037401	8.2045	7.07167	8.68343	7.57857	9.66894	8.10057	8.32014	8.67362	8.61464	6.38506	8.20878	9.0706	8.06377	9.58101	9.10948	8.75015	6.84018	8.91324	6.44764	8.79702	6.9412	7.9644	7.94758	6.08366	6.90894	6.78787	6.41489	7.49304	8.7416	7.83908
ISYNA1	0.939561	0.00646631	0.027936	7.17053	6.23097	6.93166	7.68328	7.56493	7.73861	6.06916	6.38744	7.05614	6.22362	6.60179	5.89162	7.7286	8.37215	7.53687	7.87208	6.74189	7.73655	6.89866	6.24572	6.87262	7.1657	8.58513	5.77268	6.14083	5.68481	5.94796	6.75742	7.0821	7.84739
ITFG1	0.774306	0.0378429	0.0942981	9.26968	8.49538	9.27265	9.71481	9.21617	9.98838	8.79038	8.31613	8.66168	7.20425	9.59472	9.29552	10.7362	9.92007	9.68325	9.67773	9.04093	9.21617	8.39931	9.37236	8.65784	10.2788	8.90312	8.05169	8.07437	7.55499	7.94021	9.66776	9.68325	9.99258
ITFG2	0.683699	0.032013	0.0838435	7.66665	6.98295	6.79784	8.76988	7.45383	8.88505	7.09675	7.27386	7.80943	7.35198	7.09149	6.81555	8.81469	6.97766	7.75172	8.52916	6.88657	7.75784	7.98833	7.0422	7.80703	8.27473	7.40441	6.62925	6.96325	6.13576	6.49342	7.66405	8.01199	8.08639
ITFG3	0.683978	0.000324455	0.00323606	8.26166	7.57768	8.06455	8.39589	8.40422	8.71151	8.19316	8.60512	8.23142	7.56027	8.17616	7.90184	8.46092	8.43447	7.98086	8.38794	7.75726	8.45689	7.71151	7.72711	8.06513	9.05724	8.70056	7.78447	7.37466	7.41343	7.46813	7.70709	7.71831	8.77252
ITGA6	1.52113	1.11747e-05	0.000243271	9.85029	8.32915	10.4614	9.06589	9.37914	9.78402	8.90969	8.75673	10.6402	8.98634	11.052	9.40072	11.0803	9.80615	10.4329	10.014	9.95332	9.88175	10.001	10.458	9.16144	9.51526	9.37772	8.10366	8.3694	8.18634	7.98907	9.08999	8.23646	10.5882
ITGA9	0.886681	0.0247039	0.0695919	6.28423	5.39754	7.48224	5.48284	8.38631	5.92093	6.56702	7.95255	6.23887	5.53897	5.67711	5.26901	7.70352	5.78538	6.2689	7.03956	5.4804	7.33743	5.4384	5.67526	5.7355	6.1113	5.71567	5.51283	5.23019	5.51979	5.26693	5.38332	5.47221	5.44582
ITGB1	1.233	1.02267e-05	0.000229174	10.2869	9.05394	9.90864	10.3525	9.64757	10.7138	9.90609	10.7571	10.1818	10.2683	10.5882	10.8699	10.5796	10.0057	10.2693	9.58101	10.8489	10.3712	10.7946	10.3911	9.50772	10.0921	10.2061	8.61028	8.79216	8.17941	8.61985	10.2488	9.87314	10.4714
ITGB1BP1	0.667009	0.0110265	0.0404175	8.11818	7.45117	7.55029	8.54541	8.17579	8.44618	8.06169	8.01851	9.23164	7.494	8.3923	7.69024	7.52646	8.35944	7.81473	9.37236	7.05943	8.46264	7.88431	7.98529	7.23357	8.48852	8.56395	7.18712	7.11145	7.35151	7.22829	8.02063	7.80802	8.24324
ITGB6	1.14258	0.00836523	0.0333967	6.6845	5.54193	5.70684	5.62779	5.99066	6.03769	6.91338	7.16496	7.88343	6.47665	6.97018	8.41509	6.26923	6.03594	6.02211	5.40618	7.02893	7.7679	5.72556	9.46296	5.98111	6.74108	7.19243	5.60063	5.37205	5.95056	5.52249	5.2228	5.58303	6.23895
ITGB8	1.95602	2.5998e-05	0.000467269	9.72958	7.77356	8.43223	9.51526	9.95782	10.2001	9.70965	11.468	9.94825	9.04813	10.1724	11.1473	9.58416	10.9423	9.38024	8.96882	9.09201	10.0342	8.75181	8.92496	9.10984	9.6622	9.40464	6.92549	6.70988	8.14877	7.21312	9.95607	7.68802	10.5963
ITPK1	0.835136	2.01462e-05	0.000381892	9.67757	8.84243	9.56729	9.58006	9.35662	9.33006	9.88492	10.2522	9.45123	9.38284	10.0841	10.3203	9.86024	9.78886	9.59669	9.50103	9.95512	9.48179	9.58701	9.0228	9.69836	9.99924	9.56968	8.38756	8.98952	8.42741	8.50462	9.23516	9.51036	9.63613
ITPR3	0.981397	0.000182002	0.00208628	8.748	7.7666	8.50149	8.17941	8.89813	9.18232	9.37572	8.85704	8.93363	7.64939	8.4933	9.41016	8.65915	8.45092	8.66116	8.34916	8.71888	9.39672	8.46924	9.35113	8.68147	8.89089	8.38898	7.17134	7.41261	7.17551	7.48133	8.6968	8.66202	8.95769
IWS1	1.07459	8.55884e-08	5.79368e-06	9.70394	8.62935	9.77684	9.57172	9.44294	9.90938	9.67361	9.64702	9.70085	9.30972	9.77732	10.0658	9.96434	9.64659	9.60221	9.66471	9.89555	10.0161	9.44817	9.74875	9.17208	9.97579	9.72744	8.2689	8.50203	8.07998	8.2602	9.41062	9.25438	9.74976
JADE3	2.02412	4.83384e-07	2.20603e-05	8.68434	6.66022	10.4435	8.34762	8.45622	7.9864	8.60117	8.52845	8.77796	8.46344	8.9241	8.33273	9.88114	9.16317	9.20309	9.50772	7.54563	8.30128	8.40367	7.59984	7.56113	9.29165	9.33659	6.01212	6.64356	6.82066	6.12196	6.87359	7.48941	8.3989
JAG1	1.00165	0.023943	0.068018	8.10661	7.10496	7.95578	7.97063	6.7469	8.54355	7.67585	6.35342	9.0091	8.08639	7.28345	7.29478	9.69221	8.94426	7.6987	6.59299	7.98753	9.13449	8.1948	8.8771	6.76537	9.48224	7.9755	6.61379	7.0046	6.72821	6.95066	7.80836	7.52414	10.0805
JAG2	1.08283	0.000124757	0.00157617	8.24636	7.16352	8.30396	9.81594	7.73826	7.87871	7.74909	7.50366	8.93691	7.51542	8.27761	9.07954	7.75477	8.47696	9.11908	7.85759	7.68929	8.22342	7.73519	8.12852	8.24217	8.30294	8.73549	6.95637	7.25167	7.01811	7.00329	7.20055	7.55116	8.3553
JAGN1	0.734856	0.00548195	0.0249854	9.69799	8.96314	9.29896	9.81813	9.6224	10.3289	9.51852	9.77732	9.97108	9.39026	9.74875	8.68423	10.4967	9.61354	10.0194	10.3784	8.99452	10.3514	9.49039	9.7397	8.86591	9.52602	10.4253	8.05355	9.1263	8.42466	8.78888	9.55902	9.82641	9.29594
JARID2	0.708863	0.0244007	0.0689925	7.81278	7.10392	8.69817	6.8654	7.78873	8.67074	7.40176	6.7501	6.90518	8.59267	8.0949	6.73257	9.51988	8.10088	7.21898	7.62141	7.79097	7.86733	8.61549	7.8394	7.54843	7.692	7.5346	7.29224	6.72053	6.83348	6.6347	7.35907	7.78347	8.03154
JHDM1D-AS1	0.983051	0.00241332	0.0140663	6.75614	5.77309	6.48078	6.38542	7.18372	6.48714	6.48037	7.59405	6.98787	5.9901	6.45983	8.61715	6.72182	7.02933	6.86961	7.12414	6.11694	8.46924	6.02574	6.13367	5.81763	6.68303	6.61955	5.90202	5.5583	5.53733	5.45621	6.10851	6.07618	6.35797
JTB	1.09188	9.68191e-06	0.000219181	12.3179	11.226	11.9409	12.5927	12.2792	12.565	11.8599	12.2009	12.6301	11.962	12.3589	11.5809	12.3653	12.4461	13.0477	12.5311	11.8262	12.8659	11.8481	12.2906	11.9851	12.9339	12.559	10.6671	11.1369	10.7406	10.7805	11.9327	12.0982	12.3235
JUN	1.18842	0.000714058	0.00576729	10.0146	8.82617	10.1337	10.2386	9.17174	10.5076	9.65394	10.9745	10.406	10.4986	9.66838	10.2807	9.37236	10.4185	9.25649	9.56599	8.89311	10.3724	10.5503	9.84401	9.70828	10.4553	9.21041	8.48882	8.53572	9.9457	10.1792	7.7863	8.02125	11.1403
JUND	0.950706	0.00182524	0.0114258	9.70695	8.75625	9.41623	9.49295	10.3565	9.51247	8.41334	10.5227	9.84332	8.74681	10.1467	9.27986	10.1261	10.5748	9.50048	10.0228	9.94825	10.0537	9.03325	8.76771	10.1641	9.89307	9.81388	8.29081	8.47548	7.92075	8.47157	9.61534	9.76354	9.92402
JUP	1.52189	3.9137e-08	3.2562e-06	9.15219	7.6303	9.16787	8.67895	10.3969	9.52717	8.96081	9.59113	8.70404	9.011	9.52667	8.99357	9.20876	8.29813	8.81303	8.73282	9.23742	9.38425	9.39026	9.39026	8.61589	9.13138	9.37504	6.91408	7.84709	7.75092	7.30033	7.60356	8.36583	9.21289
KANSL2	0.873456	0.00127971	0.00885653	10.3049	9.43143	10.1625	10.4495	10.4805	10.8688	10.1347	10.1487	10.4892	10.8984	10.045	9.5363	10.8555	9.81885	10.8404	9.63231	9.62365	10.218	10.4299	10.0618	10.4092	10.086	10.6609	8.88505	9.87087	8.59492	8.50025	10.191	10.5464	10.8572
KARS	0.822985	0.00518944	0.0240304	11.654	10.831	11.249	11.8206	11.5737	11.7738	11.6366	11.1281	11.172	11.3626	11.8354	11.2688	10.6789	12.0775	12.718	11.8288	11.2036	12.1863	10.2913	12.2746	11.5186	12.6922	11.4933	10.4185	10.9803	10.4636	10.4219	10.836	11.8659	12.605
KATNAL2	0.736201	0.00010682	0.00139819	5.89008	5.15388	6.16651	6.19519	5.74335	6.06029	5.19975	5.71085	5.99678	5.66032	5.75273	5.49481	5.76315	6.17996	6.31055	5.87456	5.66609	6.18987	5.76352	5.68437	5.43879	6.26465	6.32866	4.64861	4.89689	4.80926	5.09805	5.88273	5.58773	6.13703
KATNB1	0.607847	0.0133548	0.0459556	6.72948	6.12163	6.42625	7.03503	6.9129	7.02155	6.65388	5.91383	6.37399	6.05486	6.70815	6.22735	7.89804	6.69866	7.6752	6.95659	6.7566	6.42204	6.29779	6.86691	5.88116	7.53102	6.52969	5.75092	6.14232	5.79069	5.894	6.5458	6.60606	7.20707
KAZN	0.955904	0.00529315	0.0243449	8.02751	7.0716	7.8976	9.74658	8.2618	7.56676	7.38916	7.63268	8.23853	7.19916	7.61655	8.43699	8.60741	8.37957	8.0409	7.5727	7.89816	8.63464	6.99231	6.77204	7.66748	8.99698	7.54186	6.82414	6.78176	7.12977	6.47054	7.63514	7.58827	9.51526
[truncated: 2,209 more rows]

## Sheet: down_HGSOC_vs_normal
#log2FC <= -0.585 #p-value cut-off <= 0.05 #q-value cut-off <= 1.00 #Condition pair: down_HGSOC_vs_normal
[truncated: 3,534 more rows]
