# Supplementary material for: The Expression and Role Analysis of Methylation-Regulated Differentially Expressed Gene UBE2C in Pan-Cancer, Especially for HGSOC
Source: Cancers (Basel). 2022 Jun 25;14(13):3121. doi: 10.3390/cancers14133121 (PMC9264902; doi:10.3390/cancers14133121)
Supplement: Supplementary file 1 [file cancers-14-03121-s001.zip › Table S6. DMGs with high methylation sites and low methyla-tion sites in the GSE133556 dataset.xlsx]

## Sheet: GSE133556 diff_methylated_gene
up_methylated	down_methylated
NCOA2	C1orf133
HEG1	KCNK1
FLJ46111	RBPJ
TBC1D10B	ATP1B1
ALDH9A1	HAPLN2
SMNDC1	EIF4E
CSAD	SH3BP4
LY6G5B	DUSP6
AP2A2	MRO
CHD3	DHRS3
RALGPS1	C14orf50
SERPIND1	E2F8
THSD4	DHCR7
TPCN2	GALNT7
MAP4	SLC20A1
TBC1D9	GJA3
CDC42BPB	CKAP2
MYLK-AS2	TUBB
LINC01358	RAB28
PLA2G4E	MDM2
C10orf76	MAP3K13
TULP4	DTNA
GCNT2	DCPS
DNMT3A	DLX2
DES	GATA5
NFIA	LDLRAD3
CREBBP	LINC01461
CFLAR	SEZ6L
RTF1	HUNK
STX8	PAQR4
TRAF3IP2-AS1	SPG11
HERC3	C13orf15
SCYL3	SLC4A7
SH3D19	ARIH2
B4GALT1	NUDT17
PQLC2	TNFRSF10B
CLU	FBXL8
MAP2K4	SLC25A11
TOLLIP	FBXO42
KCNN3	KIAA0513
MICALL1	SOX9
FOXN3	HELZ
DIP2C	XPNPEP1
ACTN1	MYO10
AMPD2	FKBP7
PI4KA	ANKRD43
MYH11	IFRD1
FBXO32	GCNT1
ELN	CDC25A
ATXN10	KCNIP4
BST1	SLC25A33
TLN2	PARP4
ZC3H8	C5orf66
PPP6C	ZNRD1
SKI	NAA15
RAPH1	TJP3
RBPMS	MAML2
PBX1	ZNF217
C6orf94	ABHD2
LOC100129148	SPINT2
SASH1	MT1X
ATP9B	SERTAD2
GCLC	PDZD2
RAPGEF1	PLEKHN1
BCO2	CTSA
GLIPR1	CDKN3
EPN2	UPB1
SMYD3	SLC43A3
IKBKB	TMEM149
ARID1B	KIRREL3
FOXK1	C17orf37
ATP2C2	CTPS1
FOXJ3	REPIN1
REV3L	LOC283731
CAMTA2	OSGIN2
ZSCAN10	MECOM
LAMA4	TUBA8
RAB23	CCNL2
TNRC18	TLCD1
LRPAP1	NKIRAS2
FAM114A1	TNS3
GPBP1L1	RGS2
SNAP47	SOCS3
CSNK1G2	ENO1
AFAP1L2	SMAD6
ATP8B4	AIP
EXT1	MAP2K3
BMF	LYN
NDUFA10	RUNX1
DHX30	C10orf88
CHST11	FOXA1
CTIF	COL21A1
BCAS3	ATP9A
C4orf29	PITX1
LRSAM1	CYB561
TACC1	LGALS9
TRAK1	DDX60L
KAT6B	LINC01063
ALPK3	FAH
AMN1	MAPK13
MAD1L1	BAI2
CNTNAP1	PIP4K2C
CDC27	ZDHHC23
TBCD	IGF1
DCP1B	TBC1D24
TCAF1	KRT7
LOC102724957	CDC42BPG
FSCN3	PIEZO2
DGKE	CMTM7
TRIM62	PAIP1
MS4A10	TRNT1
STRN4	RASSF3
SHOC2	CST7
ZC3H3	IL10RA
SPRED2	KIF1A
DERA	ASPSCR1
TIPARP	FAM160A1
XPNPEP1	GATA6-AS1
ARHGAP39	COL13A1
MAGI3	FXYD1
PAWR	STEAP3
HEATR2	FADS3
EPHB2	PTPRN2
MATN2	TBC1D22A
ABL2	RGL3
OTULIN	VRK2
ENTPD4	LOC101927588
CFAP97	LRRN2
STX11	AFG3L2
ARHGAP26	C11orf20
ZNF618	SLC6A6
ZNF740	SLC2A1-AS1
TMCO3	CASP8
NCAPH	SIAH3
RC3H2	SLC2A9
COL12A1	SOX2OT
LINC01455	RHBDF2
FECH	LOC653486
CD44	EMX1
ELK3	RAP1GAP
GTF3C1	FLJ45983
CAPZB	ATP6V0D1
CRLS1	TMEM8B
CHD1	MCF2L
TRMT61A	LOC285375
CHRNA6	SLC24A2
AUTS2	GALNT2
EPB41L1	MAP3K1
LINC00341	SIRT5
ZAK	DLEU2
CDC25A	MAD2L1
UBE4B	RPL13
LINC01512	SPTBN4
SPTLC2	ZNF346
ZNF664	RPSAP52
EIF2AK1	APC2
RNF216	CRTAM
CLEC16A	LOXL1-AS1
RNF103-CHMP3	RPLP1
CST3	B3GNT2
RBMS1	PODXL
ZC2HC1B	CKLF
NCK2	FAM3C
TRIM72	NT5DC3
TAL1	ACCN4
SPARCL1	SFT2D2
RPS6KA4	P2RY2
ACAP2	PLEKHG1
CD101	CCNB1
SEC61A2	CLGN
GLYR1	RELB
MICAL3	PGRMC2
MAPKAPK3	NDUFC1
VPS13B	KMO
EIF3F	EIF2B1
ERAP1	WARS
ARHGEF10	TIPARP
GGCX	MRC2
AXIN2	C3orf57
SLC29A1	GPNMB
CUX1	COL22A1
AKAP1	TMEM102
TRAPPC9	CA2
SEC14L1	TMEM160
VANGL1	ESRRG
WDR88	KPNA5
CBARA1	LIF
KIAA1967	F11R
PPP3R1	LIMK1
AP3M1	VAMP8
ZNF490	FGFRL1
RNU6-28P	GATA6
YARS	BCL2L11
ABCC1	FAM83A
RFX2	SGOL1
OSR2	EML2-AS1
SPTBN1	LPCAT3
LRP5L	NME2
PLXNA2	ANKRD9
SORBS1	MLC1
GK5	PSMA4
C5orf66-AS2	REST
ATG2B	KRT8
PDE7B	IL16
PRR23A	RASGEF1B
CMIP	C6orf174
PRKCZ	VWA2
ACTG2	ANXA11
ZNF397	ANXA7
CACNA2D2	TLX1NB
GAPVD1	CCNE1
RNF10	ODZ2
RAPGEF6	ABAT
MED13L	MTIF3
IL6R	WASF2
TMEM182	NOL7
BCL9	LTBP4
C15orf57	RGMB
MOBKL2B	FNBP4
MYOM1	ATP8A2
FOXK2	CHRNB1
GFRA3	HMGA2
MYOF	C14orf70
FGD6	NAA40
SH3PXD2A	FAM131C
ENAH	PSMB8
REV1	BICD1
STK36	PERP
GARNL3	HM13-AS1
IGFBP5	TSPAN18
PACS2	PIPOX
ADCK4	PARP14
SUFU	SPAG9
WHSC1	GPR3
SSH1	PLK2
MIR3671	OTUD7A
CASP8	HSD17B8
VEPH1	SLC14A2
PARP16	LOC388282
EEFSEC	RAB14
GNAQ	KPNA1
RPTOR	ACP6
VAX2	SPEF2
YAF2	TENM2
PIK3AP1	OLA1
CAND1.11	MPP2
APOPT1	RALGAPA2
CCDC170	TGFBR2
CARM1	LOC286059
NCOR2	MUC2
SMG6	PTPDC1
DIS3L	PPP1R36
LPP	FBXO5
SLC4A1	DNMT1
AKAP13	BRWD1
SLMAP	ALOX5
PLXNC1	CCDC3
ZFAND3	RPH3A
TEAD1	TJP2
THRA	RHOV
USP6NL	GNA14
ALX3	SLC43A2
MIR3134	GRK6
CHST3	TRIM15
UTS2	CRTAC1
AFF1	MCC
NXPE3	MAFF
CKLF	TYMS
PRRX2	TGFA
RAB28	CXCL12
GTF2A2	CD83
SON	MCEE
CYBRD1	S100A2
LMOD1	ATIC
OSMR-AS1	HES1
CCAR2	LINC00961
DAAM1	SETD7
PGGT1B	OTUD4
SNX32	C14orf142
UBTD1	OSBPL9
NAPA-AS1	RNASEK
GNAS	LOC101929633
ITGB1	ATP8B3
INTS3	NEAT1
UIMC1	PLEKHG3
C10orf47	SLC8A2
USP35	PRR15
C18orf25	C9orf114
DSCR6	RASGEF1A
WTAP	PRKCZ
HMBOX1	FAM105A
NR2C2	CHST12
KANK2	SH3BGRL2
MYLK	RAB33B
SACS	ATP9B
UBTF	FAM60A
INO80D	GRID1
XPO4	PADI4
HDAC4	NTM
ZNF589	TMEM37
DPP3	AP3B1
LIMD1	PDE2A
DNAJC18	AMD1
ECE1	CD82
TAGLN	PTTG1IP
INPP5A	MAZ
UPF1	C16orf7
CYP1B1	E2F6
KANSL3	AP3S2
ZNF24	IL1RAP
KLHL5	CORO6
LMCD1-AS1	SYTL1
RBPMS2	PAFAH2
SLC40A1	HTR5A
PSKH1	RBFOX3
RNF217	TMC6
VOPP1	CCNO
PPP2R5C	HSPA8
PPP2R3A	SP6
DUSP13	EPHA10
LLGL2	NDST3
TNRC6C	DPF1
MYO9A	MXD3
KLHL31	GTDC1
KIAA0430	LPP
NR1I3	CD8A
LRRK1	GADD45G
KCTD13	SLCO3A1
MAPK14	OCIAD2
CCDC88C	ANP32B
FAM13A	LAMA3
MEDAG	GPT2
C8orf76	ITGB5
C9orf3	S100A10
ENDOU	C1orf96
BAT2	FLT1
OAT	ABCG2
MAML1	RASIP1
PTAR1	DGKI
LOC728264	GSG1
NUP214	CCNT2
SPATA5	TOM1L2
KDM4B	RBM15
ATP2B4	PAPPA2
PNRC1	PGM2L1
TBC1D1	TCF7
TIRAP	TNFAIP8L1
POLD3	LINC01428
FANCA	SVIL
ANKRD11	SH3TC1
KIAA2012	HLA-DPB1
SH3PXD2B	DDX23
WNK1	LRRC33
KCNMA1	PARVG
ELL	CCND1
ABCA4	CDS1
SPEG	TTBK2
CENPF	BLVRB
LRP8	MT1F
KLHL22	PDLIM1
FYN	ZNF672
COIL	MBP
KIAA1211	TPX2
DNAJC16	VPS52
CTBP2	SEMA3F
TOMM7	SKAP2
FOXP4	NCOA7
ABHD6	LOC284837
NSMCE2	SIK1
NEDD9	P2RX3
EIF2B5	NIPAL3
PAFAH2	GPR158
MECOM	RYK
VSIG8	COTL1
RNPEP	LPAR2
IRS1	SHB
C2orf64	PUM2
ABCB8	FGFR2
CMTM1	AQP5
FARS2	CHPF
EXOC4	PDE4C
XPC	LOC102724661
CTNNA1	SSBP1
ZBTB38	WDR51A
MAML3	KDM4D
POU2F1	ENO3
ANKMY2	ADAM33
CD34	GSX2
AGAP1	TMC8
SNX33	S100A8
TACR2	GH2
RPA3	NANOS3
PCDHGA8	PFDN6
RAB8B	ATP12A
SLC41A3	PTK2
GMDS	ESCO1
LRRFIP1	SLMO1
KIAA1549	C14orf135
MB21D2	EED
SLC25A2	TMEM144
FAM178B	C1QC
CENPJ	RABEPK
ASB7	ENPP5
RPS29	DUSP1
SCARNA3	SORL1
MAP4K4	GMDS
SLC39A11	SF3B1
RBM20	SRCAP
LINC01525	FAM132B
MED12L	ATP6V0D2
DPF3	SLC9A9
FAM118A	LOC100272146
MIR6830	ZNF785
CDCP1	GRAMD1C
TNS3	IL5RA
TPM2	RPL3
MED27	C6orf115
PRKCH	GHDC
TSEN2	RCAN1
LOC100129924	ZC3H4
RARA	RNF144B
C3orf21	SLX4IP
STX16	LINC00562
SYNJ2-IT1	SLC7A2
SEC61A1	SLC39A11
HERC2	TIFA
PRRC2C	PDE10A
HIBADH	SLIT3
ATXN2	BTBD11
CTDSP2	NDUFAF3
RNPS1	MUC1
HLX	STK17B
EIF4E3	KAZALD1
PCDHA6	DSP
USP12-AS1	KRTAP6-1
C2CD3	SGPP2
ERGIC1	HTATIP2
UACA	C3orf32
TEX12	CHRNA6
DKFZp686K1684	RNASET2
MYO10	PRKCH
KIAA1217	TBL1XR1
BTBD9	LOC101928651
CAP2	GALNT3
TTLL5	ARAP2
INCENP	TMCO4
SLC12A7	PAPOLA
MIEF1	LRRC8D
SIDT1	B3GNT7
ZHX2	DUSP4
KIAA0196	KIAA1486
CCDC101	GRIN2A
RAD51L1	BMPR1B
TOB2	MBOAT4
KMT2C	IGF2AS
ST7	CHAC1
PRRC1	BSG
TPM1	GHR
GOLPH3L	MRPS18B
RGS3	TRAF4
EIF2C2	STAT4
TPST1	DHCR24
NAA50	TSPAN13
PPP6R1	C3orf72
FUBP3	SLTM
PTPMT1	C11orf60
TTC7A	TTC22
PPRC1	FANCA
YARS2	PAFAH1B3
ZSWIM6	HMGB2
VPS8	MAP3K10
CHCHD6	GMIP
FTO	ZFPM1
SPCS2	LRRC56
MYST2	PPP2R2C
ACTL7B	2021-09-07
MKRN1	IL12A
ALOX5	CHST8
NCS1	SNORD93
XPO7	NTRK2
GRB10	OTX1
KANSL1	RCAN3AS
C11orf49	CHI3L1
ARNT	EPB41
SLC2A12	SH3RF2
EHMT1	DUSP5
PPARGC1B	CLDN3
SND1	CNNM4
ZBTB40	GABRP
MPP4	FRYL
SETD5	C8orf34
SETX	SAMD10
C21orf59	UNC84B
PML	HSPA4
MIR641	CCR7
CMAHP	TUFT1
CHN2	LRFN4
RAPGEF4	ADAM23
ZC3H18	C2orf76
GATAD2A	MYLPF
TCF12	DAZAP2
LINC00578	PLEKHB2
TMEM138	TNFRSF10D
MSI2	MGC14436
ASTN2	MYT1L
ENY2	C4orf34
CTPS1	MAN1A1
PRKCE	BACH2
PPP2R5D	CDH4
USP54	CHD5
PDLIM7	TMPRSS7
C6orf47	SLC2A6
FRMD4A	EFNB2
KIF21A	TNFSF15
SYNGAP1	SRCIN1
LOC388406	PLK1
WWP1	FXYD7
RPGRIP1L	TMEM180
POLL	ZNF503-AS2
FBXW4	FASLG
MEGF8	GSG1L2
FAM160A1	FUT1
LINC01057	PTBP3
SMIM2	PRAME
NFIC	MPZL3
LINS	RPS6KA2
SLIT2	C21orf2
DLGAP1	PDGFA
DCUN1D4	CERS6
TNFRSF25	SPAG1
TNFAIP8L3	TEC
RECQL5	EPB41L3
TAX1BP1	SWAP70
SIAE	CA12
KCTD10	PAK6
TTC7B	SLC25A20
DAGLA	DALRD3
FGGY	SRRM4
SESN1	SFRS3
PRPSAP1	PPL
BBS9	LOC101929380
GLO1	GRM1
ADCY6	USP4
DOT1L	SLC17A5
LINC01599	RNASEH2B-AS1
TIAM2	FLJ37543
LOC100507431	PPP1R14B
AP4B1-AS1	NDUFB4
TGFB2	LOC339524
PICK1	LOC101927587
LRFN3	COL18A1
STAU2	APEX1
ABL1	RALGDS
ITPKB	CCDC47
SCUBE2	PC
MTA1	TDRKH
BRD4	CHST11
APBB2	MIR5096
IGF1R	HDAC11
SOX10	SERINC2
PTK2	CD3EAP
RANBP3	C6orf223
ATP6V1E2	MAP2
ZSWIM4	SEMA4C
HIST1H1A	C9orf89
MPRIP	PEX5L
ZNF274	LINC00649
HEATR5A	RGS20
TGM2	ISPD
LRIG1	HOXB4
AGPAT3	DUSP28
NXN	PITPNM1
POLR2A	C15orf52
MIR302A	SFTA1P
TMEM39B	ACVR1B
MKL2	TAGAP
LRCH1	PTPRE
ZZEF1	SUPT6H
MGLL	CSMD2
TNRC6A	NTN3
FANCL	UNC93A
YES1	CBLL1
2021-03-02	SRI
GNE	EFCAB4A
LOC100506476	MRPS22
MIOS	MTO1
DAB2IP	DIAPH3
ZNRF1	SAP130
EIF2B2	LOC101928417
MINK1	SLC37A4
ITGA10	MS4A7
ITFG2	KIAA1026
MBD6	CPA6
MON1A	PPIF
C5orf42	DLEU1
LOC102723344	KPNA2
ASZ1	PARD6B
SERGEF	LOC100507389
2021-09-09	LOC100133991
MIR5095	C12orf43
ZNF605	PRKAA2
OVGP1	ESPL1
MIR143HG	TNFRSF10A
AVIL	COG1
MLLT1	SLC35F2
C11orf92	TACR1
ACAA1	SLC25A24
KCNMA1-AS1	BCL2
CORO1C	ASAH1
TNRC6B	FHL2
MEF2A	SLAMF6
RNF141	RPL27A
TBC1D22A	C16orf53
RUNX1	WFDC3
RPS15AP10	SLC6A5
LOC100505736	C12orf75
PHF19	MS4A4A
CLPB	TMEM20
RPS23	GRM3
BPTF	TLL2
CCDC79	CHPT1
FOXRED2	ANKRD56
RAD51B	GMPR
FBXO18	MYCNOS
RTN4	GPRIN3
TJAP1	LOC92659
PKIG	AKR1C3
SEPW1	SLBP
FIG4	DUSP23
TMEM9	TLE3
SLC1A2	CTIF
KDM4A	OASL
STK24	ZBBX
RPRD2	CALCRL
DIRC3	THUMPD1
DLGAP4-AS1	GABRB3
DICER1	PRDM15
QRICH1	MIR196B
SMTN	SOX2-OT
MCOLN3	CD300E
SNX1	EZR-AS1
MBNL2	CCT6A
ZNF71	C10orf41
VCL	LOXL1
FBLN1	RCAN3
FANCC	KRT18
ERCC4	LDLR
C15orf41	EPHA1
ADRBK2	TP73
MRC2	PTPN14
ANO6	ZNF335
PROSER2	NUP43
NSUN2	LMTK2
ACTA2-AS1	IFFO2
PLEKHG6	TKT
SRP68	HES3
TBC1D15	PIK3C2G
TRAM2	SET
PALLD	CYBA
DIS3L2	COX10
PXN	ABTB2
BOC	SNRPB
LRP5	ARHGAP24
MAPKAP1	RNF216L
LY6G6E	UGGT1
IGF2R	ZC3H12A
TBC1D9B	TCF21
LDLRAD2	OPCML
SLC29A3	PDLIM2
FLNC	ENPP4
GNB5	TMEM132D
AMICA1	CABLES2
CYP26C1	LGR6
SERPINF2	SRPK1
IRX2	PRR16
RPS6KL1	AHCYL2
SIL1	RARA
CNNM4	TOM1L1
CLIP1	C6orf48
LOC100128164	CSMD1
CAMKK2	METRNL
MAST4	DEGS1
ALDH18A1	SYT4
PELP1	LIPH
ELAC2	C20orf27
DNAH14	KIR3DX1
EP400	ATP2A1-AS1
MFSD11	ODF3B
LUZP6	CHST13
CTNNBL1	PPFIA1
WNT5A	EFNA5
TRIP13	MIR646HG
SOS1	MRPS24
PPP1R12C	ADRA1D
RNF169	VEPH1
ANKRD6	PRKCA
ZFHX3	TRAF3IP1
LAMA3	ZCCHC4
ZNFX1	SNX5
CYTH3	SCRN1
ITGAM	GALNT6
CAPN2	GRM7
SHROOM3	KIF23
KIF13B	EIF4E3
POC1A	CCDC148
LYSMD3	2021-09-02
GNA12	SEMA4F
ARSI	TALDO1
RNF19A	HOXC-AS3
APOBEC3F	CACNA1A
TRIM71	HCP5
KCNJ14	HCG22
CAMTA1	PUM1
SPIDR	DLL1
SNX9	PSMB8-AS1
ZNF671	HSPA2
TBXAS1	AGBL1
TRAPPC12	KRT19
MTMR14	TNFRSF9
RTKN	THY1
ITGA7	CPPED1
SLC35D1	KIFC2
LOC100507073	ICAM1
ADSS	OLFML2B
DLEU1	C22orf46
PTK7	APCDD1L
FAIM2	HHLA2
TMEM265	2021-09-09
AGPAT6	TPT1-AS1
APLP2	SEMA3E
GLB1	KIF9
LRP6	TRAF1
HIPK3	MEGF6
ASAP1	CLDN16
PLEKHG7	GALNT10
CPT2	C17orf48
MAMDC2	CTSC
PGR	RNF141
MIR548G	SEL1L3
WDR5	MTUS2
ZCCHC8	GPR157
LACE1	CBR3-AS1
RMDN2	DDX21
FBXO31	PDILT
INMT	ISLR2
TCF25	LBX2-AS1
PLAC9	LOC399886
KAZN	MDGA1
NOP2	SQLE
TDRD3	SNRPD1
MYO6	SPRY4
CCDC43	TMEM132A
MED24	RNF144A
SNORD54	CASZ1
WDFY2	PRDM16
MRPS17	CARS
RABEP1	LOC100132111
CYB561	EIF3J-AS1
MOCS1	LOXL3
FARP1	FRMD3
AAK1	CYP7B1
PCSK7	ST6GALNAC3
POLE	IGSF9B
DEDD	PHLDA2
DNAJC11	ARID5B
ADAMTS14	DTWD1
SKIV2L	CELSR1
GNB1	MYOM2
ANKHD1	SYTL3
TMEM30C	ARMC3
SLC25A25	CCDC57
GPR125	GABBR1
ATP8B1	RNF216
ATOH8	UNC80
SEMA5B	ASTN1
TAB1	CLMN
PVR	MKLN1
STAT1	PLAC9
LOC339666	CNOT11
RBM18	PTPRT
TRRAP	CACNA1C
JAZF1	CLIC3
ZNHIT6	C19orf81
CD36	SHMT1
REPIN1	DMKN
GCOM1	CHMP4C
GGA1	TSPO
PCDHGA4	PCGF5
C10orf119	HLCS
NPAT	CCNA2
B3GALT2	OBFC1
NKD1	ARNT2
KDELC2	TTC39B
BIRC5	HSH2D
AP3B1	FAM110B
TBC1D19	SNHG9
NOP9	CASP6
AGBL5	QTRT1
SMIM18	HEY1
HMOX2	HPGDS
ZBTB39	LMTK3
LATS1	COMTD1
CSPP1	THEMIS2
FBXO38	PKNOX2
TK1	RAB38
GDF11	ASTN2
APOH	SATB2
BLMH	NADSYN1
KCNH2	TMEM177
FLJ22536	PTPRU
FCHO2	PMFBP1
HOXA6	CBX2
SCMH1	NFE2L2
C17orf100	TSPAN33
P4HA2	ADAMTS13
ARHGEF3	RAB17
C2orf61	NELFA
PPP1R13L	ACMSD
ARID5A	SLC26A5
ZIC4	TMCO7
PCDHB9	SBF2
ARHGEF7	CD6
TNXB	SNORA26
NEK7	RRM2
PQLC1	ARNTL2
PLEKHA5	ELN
DNAJC1	ABCC3
MACF1	ZCCHC14
RREB1	LOC400927-CSNK1E
CRTC1	INPP4B
KLC1	ACBD4
TXNL4B	SIPA1L3
FGFR2	CORO2B
RUVBL1	ERI1
LDLRAD3	CSTF3-AS1
RAB22A	SHOX2
ATXN7L1	DLX4
RAI1	LETMD1
COMMD1	UNC5D
CHD4	BBC3
UGP2	SLC7A11
GYG1	ADGRF3
RORA-AS1	BASE
PCBP2	LYPD6B
DCAKD	IL1B
CTSK	ATP8B2
RBM24	NOLC1
POLR3B	TEX261
CALM3	C3orf52
SH2B3	C7orf68
C20orf54	OTUB1
IFNLR1	GGCT
APOBEC2	SPATA2L
TRIM66	CLIP1
VPS45	MAX
SETBP1	EXD3
PRR23C	CHCHD2
TTLL11	TIAM1
PGBD2	CTNNB1
SUCLG2	CNGB1
C14orf115	KCTD1
SLC25A42	PAIP2
LOC728613	KIAA1324L
CDS2	C5AR1
FAM131C	HNRNPA1L2
C16orf46	CCDC21
HTT	CTD-2270F17.1
HEATR5B	LOC101929279
ERGIC3	NRXN2
ZNF213	NAPG
SUCLG1	CXXC4
AMMECR1L	CCDC88C
INSR	KIF21B
IFFO1	RNF114
GAK	DUT
ARRDC2	SCGN
ACAD11	LOC339862
TMEM184A	ZBTB2
RAD54L2	PRKAB1
DCLK1	CORO1B
FZR1	NUDT7
SMURF2	ACVR1
UHRF2	C11orf87
GPR183	C6orf170
ACIN1	GNG7
DISC1	COL9A3
SYBU	PRTFDC1
KLHDC10	ACOX1
PCDHA1	DLK2
NR2F1	TES
LTBP1	LOC100506457
SLC41A1	KCNMB4
LDB3	PTPN6
YPEL2	HMGA1
TTC15	DENND1B
VAC14	FRMD4A
FAM126B	CDH13
MIR451	ARRDC2
GUCY2D	PLCE1
HAS3	KAT2B
ZNF778	C10orf91
TPCN1	DLG1-AS1
PIGG	SMC4
USP28	ITM2B
PPP1R12A	HS3ST3B1
PLD1	FAM167A
SOGA1	GCN1L1
CSRP1	PRR5
TMED7-TICAM2	GP2
THADA	LOC400696
GRAMD3	LINC00489
CDK17	GRIK4
NDUFB4	HRK
ZNF649	C6orf227
RYBP	MIR4757
APIP	ENTPD2
SSBP2	RHPN1
COG2	HAPLN3
LOC101927292	PHLDA1
SNRNP70	MKL2
DBF4B	CBX8
HK1	SAMD12-AS1
MLL2	LINC01342
GOLGA3	HNF1B
PHF7	TPRA1
TMCO4	TMEM170B
SLX4IP	SLC35F3
LOC101928731	KRT80
SDK2	FLJ42969
CLASP1	KIAA1432
ITGA9	TRIM31
SH3BP5	EIF1
MTUS1	SUB1
DNAJC5G	MIR548H4
CHD2	MC3R
PROSC	RALGPS1
FNDC3B	CACNA1E
MGC16142	NBR1
SF3B2	IPCEF1
MIR1207	ABCA17P
SH3GL1	RASAL3
TET3	ANAPC7
YIPF3	CCDC62
TCF3	DSCR6
IL12RB2	POLR2H
TCF7	CBFB
MANBAL	TESC
PARP6	SNX24
C14orf159	SH2B3
HNRNPM	ATG4D
MMS19	HOMER1
CHFR	GPC6
PDE8A	RARG
NKAPL	LINC01098
RIPK1	NAV2
AHNAK	AHR
SMARCA4	KIAA0652
GPR107	CYP27C1
RCE1	MAT2B
SELO	PLEKHF1
C11orf75	MAP3K14
ZC3H7A	C1orf125
SFT2D1	ETV4
CLK4	C1QTNF1
SPECC1L	WDR24
ILDR1	CHKA
WWP2	LMX1A
LOC100652768	ARHGDIB
LPPR2	IGFBP2
GIGYF1	SUGCT
RBM39	SSH3
PHF13	ANO4
HSPH1	TP53INP2
C3orf17	GRID2IP
LOC100422737	LOC389602
MIR1237	LINC01141
STX7	FLNB
LRBA	IL6
SPECC1L-ADORA2A	SLC22A4
RNF32	ITGA2
LHX6	SHMT2
DCUN1D5	ULBP2
GRB7	CALN1
BRPF1	SNX31
NIPAL3	CD84
CDC42EP4	ACOT4
E2F4	CSNK1G3
ITIH1	TEN1
FAM53A	NECAB2
PPM1H	DNAJC22
DNAH17	SLC36A2
DDX19B	TEAD4
NT5C1B	NCAM1
SNX19	PGP
ZNF837	MEST
MORC3	MESDC2
BRD1	CACNA1H
LRRC42	PADI3
CUL9	PPP2R5A
MLH3	LINC01136
GGACT	PIP4K2B
IREB2	RAB20
PPFIBP2	SLC25A21
LRTOMT	LOC113230
CCDC17	TNR
NCALD	LOC101927322
NOS3	EZR
C1orf131	GPR126
C3orf24	ARHGAP22
CERS5	TRIM22
PARD3	DNAH5
CCDC28B	ATP5B
RBM25	JMJD8
WDFY3	RAB11FIP1
HIRA	DNER
ASB2	PHACTR1
ADCK3	C7orf73
UBR4	ITPR3
BANP	C15orf58
UTP11L	LUNAR1
OLA1	RPS3A
ZNF516	LOC100506470
MIR4720	DHRS12
C12orf43	FAM180A
PIP4K2A	HEBP2
SNORA23	EYA2
ANKRD42	WDR81
MPPE1	PTGS1
PCSK5	ESAM
ATP6V0D1	PRDM10
ALDH4A1	LOC541472
DGKD	MIER1
C6orf153	ARPP19
BRWD1	LOC440925
ITPK1	NOL4L
KAT7	PROX2
IDE	GTF3A
FOXO3	LINC00523
TRIO	CHRM1
TRPM4	FBXO31
SEC16A	AP1S1
ATXN1	UBAP2L
C14orf179	HTR5A-AS1
BTN3A2	EXPH5
RAB11FIP3	YEATS4
RGMA	TMTC2
C1orf186	SMURF2
TTBK2	SNHG3-RCC1
STK39	NOCT
ESYT2	TRPM1
BICD2	NID2
PDE11A	DYSF
NDRG2	PCK2
PRCP	PARK2
RAB11FIP5	RIPK4
SLC8A1	PL-5283
ITPR3	SLMO2
MLXIP	NDUFA6-AS1
MIR548A2	PEX14
XPO6	TRPT1
TCF7L2	PSMG1
SLC30A6	CYFIP2
LRRC8B	PSMB2
ERC1	OR51T1
BMS1	C6orf132
C18orf22	TRERF1
AK1	ABCC4
DYNC1H1	LOC283050
CCNY	KLHL31
CMTM4	ANKRD37
CNOT3	C2orf70
EEF2K	PLD5
AKTIP	GAPVD1
KIAA0513	NANOS1
MYO1C	ZBP1
TSC2	ATP10A
TPRKB	2021-03-11
C1orf228	PDE6A
LAMC2	CHRNA4
TOM1L2	LINC00511
SVIL	FOXN4
ZNF366	HDAC4
ECHDC2	TUBGCP2
STK4	MYO18B
TAPBP	RBM47
CAPN5	COG2
MARK3	KIAA1244
NDE1	MT2A
TTC9	KCNIP1
FAM189B	SKP1
MCFD2	MED15
CRISPLD2	DAZAP1
PHLDB3	CBFA2T3
PITPNC1	LOC101929415
CRTAP	TNRC6A
LRP1	B4GALT5
PRRX1	HECW1
2021-03-06	SERPINA5
NFIX	ZMAT4
LZTFL1	CNTNAP2
GOLIM4	COL5A3
LRRC41	TOX2
SETD1A	GOLGA7B
SNRNP200	HS6ST1
IPO9	C6orf192
BAT5	IVNS1ABP
FRMD6	MGMT
MTOR-AS1	ZNF341
BAZ2A	FASTK
SPATA21	CXADR
C18orf32	TMEM168
SLC5A1	PPP1R9A
LOC105376360	LOC100289495
DYRK1A	IPMK
SEC24D	ZDHHC12
TTC26	STOML1
SCARA3	FLJ46284
C1orf198	AURKA
NFYC	DOCK4
RABGEF1	ODF2L
PPAP2B	YWHAQ
LOC100507424	RYR1
ACOX1	TMEM11
RGL2	LOC102724691
DNAAF5	CHRNE
ZNF592	GRK5
EXD2	PKMYT1
DDOST	C17orf44
CNNM3	SPC25
C19orf63	PARP1
KIAA1804	CCNL1
NT5DC3	KLHL26
FBXO30	NCRNA00173
ELK4	NKX3-2
MAB21L2	FUK
ZNF318	PKP2
PDE8B	MTHFD1L
GRID2IP	DUSP2
ACSL5	CACNA1I
AOC3	HTRA1
ARID4B	KCNMA1
RBFOX2	WWOX
SRCAP	LOC254559
UBE2O	ADGRG6
C9orf25	MFSD6
ARVCF	IGSF21
MYO9B	CACNA2D4
PHF20	LINC01393
RBM5	CLEC16A
UBE2I	SNX14
TBC1D16	KDM3B
TM9SF2	ZSWIM5
ETV6	TFR2
C15orf39	TOMM5
MTHFD1L	BCL2L14
RCOR1	SEC14L1
ZNF384	FAM49A
ADAM30	TTLL11
SUPT3H	TGOLN2
LARP1	DAP
OSTM1	ADAMTS6
HSPB7	KCNIP2
AHDC1	NETO1
LOC100130880	GAS5
RASL12	DOCK9
KCNJ9	AARS2
ACO2	TAT-AS1
BCL11A	NRXN3
CDC42EP3	AK3L1
SSR3	RAB19
ZNF652	SLCO4A1
BAHD1	LINC01029
EGF	CNBD1
AFAP1	IRF6
CPNE7	KRT34
FBXL13	PAGR1
GLIS3	PRDM8
UCKL1	SCN5A
RBM44	ARAP1
INPP5B	LOC100996251
BLVRB	HIVEP3
MRPL21	HYDIN
MYO1D	ARHGAP19-SLIT1
TMEM119	KITLG
MRRF	MAP3K12
C8orf46	BMP7
DENND1A	C12orf45
NPRL3	FGFR4
LYN	PARP3
PDE9A	DNM1L
MAN2C1	OSBPL2
GOLGA1	AFF1
UPF2	STXBP5-AS1
SNORA66	SLC16A11
TTC3	POP1
FRMD6-AS2	MCF2L2
SPG7	CTSO
KIAA0240	CACNG2
ST5	C1GALT1
XRCC6	TUBA1C
WWOX	ARHGEF39
DHPS	ANKRD53
GLTSCR1	HCCA2
C3orf52	FAM155A
FCHSD2	RNF214
FAM177B	GPR107
C20orf27	ZFYVE19
VEZT	TRIM45
IRX1	SH3BP5
IQGAP2	FUT11
ARID5B	AKIRIN1
SLC47A1	PRKCD
TJP2	ZNF500
XRCC5	PRRG4
ALPK1	SLC44A3
PAK4	SLFN12L
LIMS2	ELF1
SPATS2L	RAB35
PKHD1L1	CMC1
RPS6KA2	KLF16
CYFIP2	TSPAN31
PTPN1	HN1
KLHL12	ZMIZ1
HOXA10	SAMD11
RNF216-IT1	LOC643623
WDR77	HOXC10
PSD	VAPB
BAZ1B	PDE12
ADK	LYRM5
GPR25	TMED5
KLHL29	TXNDC11
LINC00867	IRF2BP1
SLC25A18	WDYHV1
MDM2	SV2B
CUGBP1	RPS19
PTPRG	KCNN4
IKZF4	RBP4
ARHGAP10	ZEB1
TRAF3	TYMP
SNTB2	RORA
MEGF11	KIF2B
ATP6AP1L	BCAR1
LSM2	ALPL
KIF1B	NOX3
C5orf13	C1orf187
TMEM2	PARM1
NUFIP2	NECAB1
BIRC6-AS2	HDAC1
WAC	DPM3
CD47	PFN1
PCGF2	SLC1A5
MLF2	BCR
PLA2G6	RELL1
VPS39	BCL11A
SFRS4	SNX9
TMEM184B	MAGOHB
DIO3	SOX12
ST3GAL1	F12
DUOX1	CEBPB-AS1
SRSF4	TBC1D8
USP20	RPS29
PITX1	NAP1L4
MFSD6	HMCN1
MIR1247	GGA3
NEURL4	PVR
ANKRD10	LOC101929555
SENP5	ATXN7L3
ARHGEF17	KLK6
C11orf2	ADAMTSL5
BTN3A1	MYO7A
LOC100132354	GPR113
LUC7L	TC2N
MOV10L1	CAMTA1
CACNB1	UBC
PCDHGB8P	TRIM27
GRASP	HLA-DRA
ANK3	STX1A
PLB1	ALDH2
SEMA6C	PKD1L2
STARD13	TRIB2
RBM19	AMPD3
NHSL1	AP4B1
KRBA2	VPS33A
VWDE	C9orf117
UGGT1	CEP350
TMEM170A	NLGN1
SIM1	JUP
NLN	ANK1
YWHAZ	MPPED2
AKNA	TRAPPC6A
RNF31	ATP6V1A
COG5	RASGEF1C
HNRNPUL2	BRUNOL5
LOC101929717	LINC01121
SNX15	LYPD1
SBNO2	LOC283352
ARHGAP35	CMPK2
DOCK1	KCNJ16
COQ9	COL23A1
KRT81	RAB37
MTERFD2	IFI30
TMEM189-UBE2V1	ZAP70
OTX1	SLC29A2
KCNAB1	CD47
CIT	MIB2
CEP85L	HPCAL1
MAP2K5	PTPMT1
ATF7	ITGAX
ARRB1	FAM188B
OSBPL1A	SNX8
CFDP1	SUN1
RSPRY1	GML
GALNT2	TRHDE
SMOX	ANGEL1
DHX16	PKM
C14orf138	UBE2E1
GABRR2	SGCD
C12orf60	PLXNC1
COG8	SCIN
DCP1A	SYNC
MBOAT1	IL7
NPRL2	LCP2
CPT1A	ZNF354A
FAM13A-AS1	C21orf58
KMT2D	CASP1
CAMK2D	PCDH7
ITPR1	SERPINB1
PISRT1	CELF2
CWC27	SPDEF
DIP2A	TUBA4A
SAMD4B	TMTC1
PDCL	PIWIL2
MRAS	PPFIA3
LINC00824	CFLAR
FAM168B	SLC26A11
AACS	GNRHR2
ST3GAL3	SLC7A14
DNLZ	NKX6-1
EXOSC2	ABHD3
C1orf109	NICN1
IQSEC1	ZNF385D
ZFR	DEFB118
LRRC17	MRPS9
SART3	TTC4
NGRN	LAPTM4B
MAP3K1	CDK6
SGCA	GLRA3
PAX5	DOCK3
RAB15	SPTA1
ACSM1	RBM38
CACNA1E	PRKD2
ZNF83	LACTBL1
GSN	RBFOX1
ENTPD7	TNXB
MTFR1L	SERPINE2
PRPF6	TMEM132C
CHD6	PNMAL2
RPS6KC1	NEURL3
RNLS	LLGL2
CD177	EPCAM
PHKB	CD164
SWAP70	KCNH1
ANKMY1	NUAK2
ATF6	PLXNA2
PARVA	SYNM
NT5C2	CRISPLD2
TBX15	IGFN1
SLC37A3	SH3GLB1
NUCB1-AS1	ATP5E
TACC2	LOC645323
FBXW8	DPYD
C6orf204	C20orf195
MTCH1	FSCN2
SDCCAG8	SLC35E3
MIR548H2	LAMB1
KIAA0232	GPD2
GNG7	LOC100133077
SNX25	GRIA4
PITPNM2	APBB2
DDX23	ESM1
PARVB	FXN
SYNC	STIL
LOC283332	HBBP1
STAMBPL1	DRD3
ZNF444	DMAP1
TAOK1	FAM168A
TUBGCP6	ASAP1
CGRRF1	C12orf68
PHF12	SERPINB9P1
PCDHGA2	OR5AS1
FAM120B	UGGT2
TRPC4AP	THAP2
B4GALT7	CCT3
AGER	IQCD
PDZD2	ARID3A
C22orf28	TCF19
MFHAS1	SSSCA1
MYH9	FLRT2
GUCY2C	STYK1
XRCC4	PRDM11
TBR1	MNT
ZBTB46	GBP3
KIAA0467	PDE4D
LRRC1	SLC12A5
USP2	ARHGAP29
SLC38A1	FANCI
TNS1	ITPRIP
CAMK2G	KNDC1
RIMKLA	PP14571
C1QTNF3-AMACR	GLRX5
FLNB	C6orf145
ADD3-AS1	ANGPT1
SMARCA2	DCTPP1
ATP2C1	THBS1
KRT13	RNF187
KLC2	ESCO2
COBL	LINC00504
NPFF	HOOK1
C17orf66	RNF145
OLFML2B	BFSP1
ADC	PALLD
MRGPRF	RANBP9
ABHD2	HMHA1
AKT2	GTF2I
FAM188B	ETV2
SNF8	HHATL
EIF3H	LCE1C
STAT2	TUBA4B
BTN3A3	KALRN
FLJ43663	SLC6A3
PLXDC1	RBM20
APOLD1	PIGU
FNBP4	GORASP2
ABCC5	CHAF1B
LINC-PINT	SACM1L
EHBP1L1	PIM3
CDK8	CA4
MEF2D	FOXN3
EML1	SLC6A12
ARID2	ADAM28
NCOA1	FOXJ3
MOB2	OLAH
PARD6G	SPINK7
INPP5D	BAHCC1
PRICKLE2-AS1	SLC27A6
C7orf31	YBX2
GPR75-ASB3	UNC93B1
RALGAPB	PDPK1
NIPAL2	ENKUR
MAGI1	URB2
RERE	SSC5D
DTNBP1	GALNT12
TBL1XR1	CTC1
BUB1	NCF4
TEX9	CNIH3
ZC3H10	POMC
LOC100506124	CCR10
PCDHB19P	RAPGEF1
KLK6	SSBP4
SEMA6D	NKTR
MAP7D1	GAD2
B3GNTL1	LRRC47
NAT9	NOVA2
SSFA2	ARHGEF3
EAF1	ATP2A1
LRRC36	ZNF2
CENPC	STK3
SOCS7	SLIT1
PER2	UPK1A-AS1
CDK5RAP2	TEAD1
SPATS2	GCSAML
ART3	B3GNT6
EVL	AMIGO2
SOD1	MIR19A
LOC101929378	MYO1D
VAX1	TRMT44
SLC44A3	SH3GL2
TAC4	IMMP2L
GRN	KCNH5
TFAP2A	C1orf38
CIZ1	RFPL2
C8orf86	EXOC1
C6orf154	LNX1
UPF3A	MYO16
BAZ2B	C6orf136
HNRNPR	SNTG1
TSPAN2	LOC100132707
PRIM2	CCL28
SLFN12L	OAS2
CLEC2L	AK4
RRP1	PDGFRA
PSEN2	KIAA0182
TRIOBP	TRMT11
NCOA7	C19orf59
RXFP1	APOBEC3A
ASAP2	SLC9A8
FAM181A-AS1	KCNA6
ACTA2	DLGAP2
TSNARE1	LRCH1
SRPK2	SLC38A1
POLR1A	CCNY
UCKL1AS	POLR3D
ZAP70	ZNF317
ARSB	ZBTB16
EBNA1BP2	HSPA1L
VPS51	ADAMTSL4
LEFTY2	ANO2
RPL23AP53	CNTN1
ARNTL	CCSER2
SUCNR1	ARL4C
NPTN	SNHG10
PAK2	SLC24A6
LOC101927817	MIR548I4
FKBP5	TMEM92
MEIS1	SMURF1
RASSF3	PCSK2
H6PD	CALCB
MCU	C1QTNF7
RNASEH2B	CRH
KIF9	LINC00836
PTCD1	DFNB31
MGRN1	REPS1
OSBPL5	PNKD
RICTOR	OSBPL1A
MAST2	DYNC1I1
STK11IP	PRKCQ
MLL4	SLC43A1
RPL22	LNX1-AS2
LINC01572	PDGFD
DENND5A	RTN4RL2
CINP	KCNN3
AP2B1	RNF149
RNF145	NT5C3
NUP93	EPHB1
ATG7	METTL21B
DACT3	NIPSNAP1
EXOC6	ZMYM2
CDKN2A	WBSCR17
RBM17	LOC101927412
APBA1	SLC22A18
ZNF587B	FUCA1
FAM160B2	YWHAZ
LARP7	MAGI2
SNX21	PNMT
SPON1	SYBU
MB	PNP
TTC28	U2AF1
PIGU	ROBO1
LETMD1	RSPH9
GEM	FAM129B
ZSCAN12L1	NWD1
ZNF438	MBOAT2
NMNAT3	MYT1L-AS1
FLJ40504	IGF1R
TRIM65	ERO1B
RGL1	CMTM8
LAMB1	DCXR
HCK	SNORD58A
VEZF1	ATP8B4
EFCAB8	CDK5RAP3
BRD2	SLC8B1
ZNF362	NHEJ1
RASAL2	CYS1
MIR6751	GABARAPL1
LIMA1	DNAJC5B
ARHGAP18	KIF26B
PLEKHA6	LOC101927379
DOK5	CYP4F22
KCNG4	CCDC68
DCUN1D2	PGS1
PPP2R1B	LOC101927043
UBE2R2	GGA1
HOOK3	ADGRF5
FHOD3	FBXO27
KANK1	CPXM2
WDR7	NEIL2
ECM2	NGFR
TNFRSF1A	SBSPON
TFIP11	PLEKHG4B
SCARNA4	CAMSAP1
MLEC	BCAS3
PUM1	HACD4
SKIV2L2	LDHA
DPH6-AS1	VOPP1
HSPA1L	SELPLG
AMDHD1	GLT1D1
OPRD1	PRPF38B
SMAD3	TSTD2
APOC2	LRRC1
MIR575	TBX6
ANXA9	CCDC168
RBM9	DPYSL2
SLC25A37	PSMF1
TINAGL1	PHLDB3
TMEM104	LATS2
TSPAN12	DIAPH1
SNORD89	CRADD
USP2-AS1	SPATA12
LINC00554	GPC5
MIS18BP1	SNTB1
RIPPLY3	FLJ46361
HMG20A	RREB1
KIF13A	AUTS2
ZNF337	MIR7853
CELA1	ZFYVE28
SLC12A4	TRIM36
ABCC11	CNTN5
KIAA0182	ARL16
PSKH2	PRKAB2
PDE6A	TMEM178B
ZMIZ1	DHDDS
C11orf93	LOC284395
TULP3	UNC5CL
NCOA6	DEF6
S100A13	ARMC2
WNK2	TMEM114
PFKFB3	DLG2
NCAPH2	ACSS2
SEC22A	GRHL3
CANX	HRNBP3
ECHDC3	DMBT1P1
LOC100506457	LOC100133669
ADAMTSL1	RASA2
CPVL	A2BP1
TAF6L	C20orf160
RAB30	OSTCL
MYO7A	LOC283140
KLHL21	LIN54
KCNG2	NFE2L3
PTCRA	GPS2
RHOJ	MGAT5B
LINC00545	C4orf33
UBE2J2	FRMD6
DBNDD2	C17orf82
RHOQ	TLR5
ABR	NR4A1
TIAM1	LINC00702
NFRKB	GUK1
PAN2	ATP2B4
CNOT1	CTNNA3
ZFYVE9	APH1B
GOLGA4	S100A7L2
PLS1	LOC100507391
TYMS	FAM159B
PWWP2B	SKA1
MFN2	PLAT
SMIM3	LOC643201
NEK9	NLRP11
KIAA0664	XPO6
ELAC1	SMPD3
SETD2	KRTAP21-1
ZNF687	SNRPN
USP4	MSR1
MBNL1	GZMA
TLX3	FBN3
POR	MOGAT1
MICAL2	LRIT2
KAT2B	LHX9
CCDC150	NAAA
PSMD14	CUX2
PDF	C1orf168
ARHGAP26-AS1	PRSS27
PSIP1	VIPR2
SETD1B	AKAP6
ZNF154	SEMA3C
LOC100507065	IPO9
PARG	C18orf56
PKD1	GAS2L3
SRSF11	TCL1B
CBLB	HLA-DMB
BRE	NADK
SIX3	BRE
ANKEF1	PTP4A1
MDM1	CDH24
PTCH1	COL4A2
CTBP1	KCNMB2
MAPK1	PRR5L
MTR	EMP3
OAZ2	CRISPLD1
ZNF324	VAT1L
HSF4	MORN4
CAST	TTBK1
INPP1	DENND2C
PVT1	CNTNAP5
SLC37A1	PRPSAP2
IST1	BOP1
LGALS8	SHROOM3
STAG1	CNNM3
CLIC1	CHD2
ZNF57	SLC39A9
NTRK2	EXT1
RELA	LOC101927822
ARHGEF10L	KLHL35
UTRN	CAV3
EMILIN1	USP29
TRIM26	OR52A4
SLC6A13	CA10
SLC8A1-AS1	ZNF564
CAV1	ATP6V1G1
LHPP	CFAP54
PPP4R1	RCN3
DDAH1	STAC
TRANK1	PSMG3
COMMD8	SPC24
PYGM	ZZZ3
NEURL1B	UFSP1
EIF4ENIF1	TNFAIP3
CCL21	ZEB2
UBR3	NR3C1
KHSRP	HAGH
PAPD5	TG
HIP1	FAM149B1
SNX20	LOC730811
PANK4	IRS2
ZNF324B	CHD7
C21orf91	PTH2
SEC13	PVRL4
MYO3B	UBE2Q1
PEPD	IQCJ-SCHIP1
ADCY3	KLHL5
SKOR1	MCIDAS
RPUSD3	SMC6
TCP11L1	ZBTB7C
ACTR1A	LINC01020
TBX4	VWA1
PIAS1	CPXM1
CCDC25	LHX4
HPS1	JPH1
NRDE2	DEFB1
CDKAL1	NCAPG
TRIM14	SORCS2
NLK	TLR9
EPS15L1	ABI1
NANOS2	KIAA1984
FAM150B	C3orf26
MTMR12	TXNDC5
SZT2	GATAD2B
C19orf21	PNPLA2
HHEX	ADSSL1
GLE1	AGBL5
CD9	LINC00921
POLS	NEFM
TTC23	LOC100128191
C6orf163	CLK3
NSF	MCART1
FAM102A	MRPL12
ZC3H15	SLPI
CLCN7	MCM4
IFT140	DAPK1
ZNF608	FTH1
NBL1	LAD1
COL2A1	LRRFIP1
ABCF1	HIPK1
DKFZP434K028	RTN2
BCL2	DENND5A
KLHL3	COL26A1
MYO18B	PRR7
MAP3K11	AKR1C4
C5orf66	SURF1
TCF4	PGBD2
CLK3	PPTC7
LPCAT1	SAMD12
HIPK2	FBXL16
GAREM	ODZ4
DSCR3	GALNT18
SGSM3	CGNL1
TMCC1	NEK10
LBR	COL15A1
CANT1	BRMS1
WDR25	ANKRD57
ZSWIM8-AS1	CCDC77
CLIC4	SLC27A2
SEMA4B	LOC101929721
EDEM2	ACD
RDH12	SST
LOC101927550	LOC101929524
ELAVL1	LINC00886
SLC1A4	GPR153
MAPK13	KCND3
PLAUR	PPM1L
ARFGEF2	DKFZP686I15217
NDUFAB1	COMMD10
SRL	C20orf85
TRPM1	TTL
ANKS1A	TSHZ2
UBE3B	SYCP2L
GGT7	SEMA7A
RAD18	LPPR1
DLST	FAM65B
BOD1	PRIMA1
KPNA6	CDH2
GALK2	LINC00243
EFTUD2	AHSA2
TMOD1	PDZRN3
MASP1	PURB
AGO2	MGC23284
HS1BP3	MAFA
MBTPS1	NET1
CYTSB	MFI2
AURKC	ADAMTS12
LINC01354	MYO1E
PPP1R3E	MMP7
ITGB7	EHD2
CYTH1	COL25A1
ABCC3	SMAD5
LRRC32	CHCHD4
POFUT2	GSPT1
NEK6	C2orf69
VPS18	OR5A1
FAM53B-AS1	MFSD3
ATP6V0A1	CADPS
ARL4A	QPCTL
FMO6P	PRR7-AS1
CCDC149	TUBB2B
MAN2A1	C7orf49
MAP7	DPP6
TCEANC2	FRMD4B
COL14A1	PHLDB2
CDK2	C19orf39
RARG	MIR5095
CPD	ZFHX3
TMEM262	CAPSL
CDYL	KDM2B
MAEA	SYNPO
SFXN5	LOC105376360
HIST1H4G	DPP8
SF1	IGSF10
NDUFAF2	ZMYM4
MLL5	PRPF31
CLIC6	PARP9
LAPTM4B	VAMP3
NCRNA00171	TPD52L1
SLCO3A1	SFRS11
NOCT	NLRP9
LDHAL6A	AP1B1
LOC100130987	PLIN3
PAK6	SNRNP70
ILK	WDR77
TMEM87B	GFOD1
TP53	PEX6
PIP5K1C	PPM1M
RUNX3	EFEMP2
QARS	ETHE1
AMHR2	LOC348840
ZNF609	KCNAB1
WNT10A	SLC12A2
TRAF3IP2	NMRK1
LHX4-AS1	PI4K2B
RAMP1	CEBPG
TES	DDA1
RXRB	STEAP1
POMC	LDLRAP1
TECTA	LEPR
FLJ45513	DPYS
FAM134C	ACOXL
TOX4	MOSC1
SLC27A1	IKBKE
BTNL9	CTDP1
FAM180B	AZIN1-AS1
PACS1	PHF11
NANOG	MAL2
PPP2R5A	FAT1
MX2	LOC100506860
RNF40	BATF3
CBFB	FASN
PLEKHO1	TMC5
HSF5	OR51B5
DPH2	CHRNA5
TSGA10IP	UNC5B
DNAH1	STEAP2-AS1
USP42	WDR45B
LOC102723831	ZNF621
PHC2	BRP44
PINK1	GFRA1
TSNAX	VCAN
ANKRD17	C9orf139
ZNF423	GABRA6
PRMT2	CD300LG
ZNF282	FSTL4
VPS52	PLGRKT
FLJ32810	CYTH4
ANO1	MIR548W
NCSTN	UNC84A
DCDC2	LOC100506178
AAGAB	XRCC6BP1
PRICKLE2	C4orf22
SMG5	OR8U8
C10orf104	FOXQ1
MYRIP	ZMYND15
MRGPRF-AS1	ERICH1-AS1
LOC100288798	SORCS3
CABIN1	GDPD5
SHE	IGFBP1
MRPL52	DDX24
BMPR2	TNFSF10
EPHB6	LOC728730
LOXL4	OXR1
ABI3BP	SNRNP27
PUS10	ADPRM
ZC3H7B	NEUROD4
TLK1	FLNC
TRIM56	SPRR2C
LCA5L	COASY
NUFIP1	H2AFY
HIST1H2AL	PLEC1
RNF213	PIP5KL1
ENG	MAD2L2
STRIP1	RAB21
PITPNB	MCEMP1
LOC339674	TAGLN2
MMP28	RADIL
SNED1	D2HGDH
NNT	CDK19
LOC101928809	APCS
SPRYD3	C10orf90
CENPP	C5orf52
CSNK1D	OR10J1
STAT6	BCL11B
EFEMP2	NPTN
HECTD3	ZNF394
GUCA1A	CORIN
RBM33	LOC642597
SPAG6	C1orf77
LDB1	NT5DC2
VPS4A	TSNAX-DISC1
MIR1301	LOC101929528
CCDC109B	HIST1H2BL
RILPL2	DIO2-AS1
FAM186B	NDUFV2
SSH2	MACF1
CBFA2T2	CHCHD10
MERTK	DCTN2
TSSK6	CACNA2D1
PCYOX1	LINC00673
HERPUD1	GSTO2
PHRF1	TBC1D13
C10orf11	HLA-F
MCM8	CRELD1
ARHGAP17	PPA1
PHYHIP	ZMYND10
ITPR2	BAGE5
C3orf18	ERC1
MRPS27	KIAA0355
KCNS1	SPP1
MYRF	E2F3
LCMT1-AS2	RNF31
EGFL8	SLC39A1
KIAA1671	GUCY2E
CLK2P	ETS1
PLCG1	CLEC17A
MAN2B1	KRTAP20-1
PATZ1	HAUS8
INF2	CASC6
SPOP	LOC102724084
HNRNPA2B1	IQSEC1
SRP14-AS1	ATG9B
THNSL2	UNKL
SAMD12	UBXN10
VWA1	FGF14
TCF20	MR1
RAB14	GPRC5A
VAV2	CLNK
NKX6-2	ISOC2
MEMO1	ZIC2
ECSCR	UNC5B-AS1
C9orf5	SERP1
ST6GALNAC6	SPIDR
MACC1	BCL2L1
PLSCR1	HR
CPSF7	FAM5B
NAV1	IL4I1
NOSTRIN	HN1L
UQCR	P2RX5
ITGAV	DSE
PCID2	TSTD1
HEATR3	TECTA
REXO1	CATSPERB
GPR161	MAPK1
GABARAPL1	TGFB1
RAP1A	MRPS5
TNFRSF8	SPATA16
HOXA10-HOXA9	TRIT1
ITSN2	SLC4A1AP
BRD8	ARID1A
ZNF789	MYRIP
ZNF155	RTN4R
ANO9	CCNT2-AS1
NFASC	DPYSL5
TSN	ARL6IP5
LINC00994	IGSF11
DLG1	LGR5
PTCHD2	SRP68
NTN4	TRPC4
TTC27	2021-09-10
SH3BGRL2	P2RX4
KIAA0556	RGS7
FLYWCH1	TGFB2
TBC1D14	OR5T1
AIG1	CEACAM4
[truncated: 12,531 more rows]
