# Supplementary material for: The Expression and Role Analysis of Methylation-Regulated Differentially Expressed Gene UBE2C in Pan-Cancer, Especially for HGSOC
Source: Cancers (Basel). 2022 Jun 25;14(13):3121. doi: 10.3390/cancers14133121 (PMC9264902; doi:10.3390/cancers14133121)
Supplement: Supplementary file 1 [file cancers-14-03121-s001.zip › Table S7. MeDEGs in the GSE133556 dataset.xlsx]

## Sheet: S7-MeDEGs
UpMethylation_downExpression	DownMethylation_upExpression
HEG1	E2F8
SERPIND1	SOX9
BST1	MYO10
RAPH1	CDC25A
RBPMS	SLC25A33
BCO2	SPINT2
GLIPR1	CDKN3
REV3L	CTPS1
LAMA4	MECOM
TACC1	TLCD1
LINC00341	SMAD6
SPARCL1	KRT7
ARHGEF10	CMTM7
IGFBP5	PAIP1
AFF1	KIF1A
CYBRD1	COL13A1
DAAM1	MAD2L1
SLC40A1	CKLF
MEDAG	CCNB1
PNRC1	KRT8
ANKMY2	CCNE1
RAB8B	PIPOX
TPM1	FBXO5
FTO	DNMT1
CMAHP	TYMS
CHN2	S100A2
RAPGEF4	ATIC
SLIT2	RASGEF1A
DCUN1D4	FAM60A
SESN1	CD82
TGFB2	IL1RAP
GNE	CCND1
MCOLN3	MT1F
FLNC	TPX2
WNT5A	SORL1
ZNF671	GALNT3
PGR	LRRC8D
INMT	DHCR24
GCOM1	PAFAH1B3
PCDHGA4	CLDN3
B3GALT2	PRAME
UGP2	PPP1R14B
IFFO1	PPIF
ACAD11	KPNA2
DCLK1	ESPL1
NR2F1	RCAN3
SH3BP5	SNRPB
MTUS1	LGR6
PCSK5	GALNT6
ATXN1	KIF23
RAB11FIP3	DDX21
CMTM4	SQLE
ECHDC2	SNRPD1
PITPNC1	CHMP4C
PDE8B	CCNA2
ZNF652	THEMIS2
IQGAP2	RRM2
PKHD1L1	LYPD6B
TMEM2	GGCT
CAMK2D	CCDC88C
PARVA	RNF114
STAMBPL1	TES
SMARCA2	HMGA1
ARNTL	SMC4
FKBP5	HAPLN3
RASSF3	POLR2H
LAMB1	ETV4
LIMA1	CHKA
ARHGAP18	SHMT2
ECM2	TEAD4
AMDHD1	PGP
ANXA9	ATP5B
KAT2B	EYA2
INPP1	RIPK4
LGALS8	SLMO2
EMILIN1	TRPT1
CAV1	LINC00511
FAM150B	B4GALT5
NBL1	FASTK
BCL2	AURKA
TCF4	RYR1
COL14A1	PKMYT1
NANOG	SPC25
PRICKLE2	PARP1
ABI3BP	KLHL26
MYRF	TUBA1C
GABARAPL1	PRKCD
NFASC	HN1
LHX9	DPM3
PAPLN	PFN1
COX7A1	MAGOHB
CYSTM1	KLK6
IL1R1	CAMTA1
METTL7A	JUP
C1RL	LYPD1
MCTP2	COL23A1
AQP1	CD47
NFKB1	PKM
PDLIM5	PCDH7
ZCCHC24	TUBA4A
MIR101-1	TMTC1
TRAF5	LAPTM4B
FRY	EPCAM
WSB1	SYNM
ZBTB20	ATP5E
FER	GPD2
ERN1	ESM1
GOLM1	STIL
PPP1R12B	CCT3
PMP22	FANCI
TTC8	TUBA4B
CLDN15	GORASP2
MAP3K5	CCL28
FAM198B	SLC38A1
TIMP2	ARL4C
PCDH17	PNP
FAM65B	CMTM8
LATS2	DCXR
STXBP1	PLEKHG4B
CCDC80	GAS2L3
CERK	COL4A2
BNC2	BOP1
CDON	CHD7
PHLDB2	DEFB1
FAM65C	NCAPG
EDNRA	MCM4
GSTM5	SST
EPS8	PRIMA1
HOXA5	NET1
ALDH1A2	MMP7
DIXDC1	MFSD3
EPB42	CEBPG
HSPA2	MAL2
RUFY3	FOXQ1
SYNE1	TAGLN2
ITGA1	CHCHD10
CALD1	PPA1
WNT4	SPP1
LRRN4CL	E2F3
RARRES1	SLC39A1
SYNE2	IL4I1
FGF2	HN1L
SLC4A4	TRIT1
UBL3	CENPF
FYCO1	DHRS13
PIP5K1B	GNPNAT1
LYST	MYB
CHD9	NOP58
ROR2	WHSC1
TSPAN5	TRIM47
DOCK4	SSB
LONRF2	SFMBT1
PDE2A	SLC25A39
PCDHB16	CXCR4
ZDHHC14	C1orf109
CAPN3	CLDN7
CORO2B	NDUFS3
CRYL1	PYCRL
FAM129A	UHRF1
FOXP1	LMNB2
DOCK5	CDKN2A
PLCE1	TSPAN15
PAPPA	DCAF17
NAPEPLD	PLAG1
PTRF	NDUFA12
CPEB1	EZH2
LIX1L	C3orf33
DDR2	DBF4
MIRLET7D	FAM83D
PLEKHA7	MCM2
ATL1	SLC1A3
TPBG	SUSD4
NBEA	SLC5A6
GPR124	CENPN
FAM46A	SAC3D1
GNG12	FRAT2
ZNF23	TMEM45B
ABLIM3	PIGW
SH3BP5-AS1	C9orf16
FGF1	GINS1
ENOX1	MTHFD2
MEG3	CCNE2
TRPC1	MREG
MFSD4	HLTF
CRIM1	GSDMD
RHOBTB1	SRD5A3
THG1L	GGH
TDRD6	CXXC5
CBX7	MCM10
LRRC2	ACOT7
DDB2	RPL8
PTGIS	CCDC6
IGFBP4	MSANTD3-TMEFF1
ERC2	CEP72
FAM20A	RCC2
ADCY9	SLC12A7
SIGLEC11	MELK
HOXD10	ATG101
AHSA2	ST14
GPR133	HOMER2
PPM1E	SFN
ZFPM2	TFAP2C
COLEC12	C1orf186
TRAPPC10	TBC1D7
PHACTR2	KIF11
PKD2	TMPRSS4
EOGT	LTBP1
FBN1	FGF18
ROR1	PTTG1
ALDH1A3	NEIL3
MCC	BARD1
C1QTNF7	NCAPH
ST3GAL5	WFDC2
TMX4	TPD52
SLC9A3R1	SLC2A1
SFRP4	RBCK1
USO1	HK1
PLCL2	STRA13
PLA2G4A	TK1
GLI3	CBS
SQRDL	PREX2
CHKB	AURKB
HAS1	TMC4
HOXC6	PCBD1
TSPAN4	SORD
SCG5	GPX1
MEIS2	HELLS
HTRA1	KLK8
MIR29B2	KIF18B
CPE	DDR1
RAB31	TRIM24
AKAP11	MB
FAM69A	LGSN
IDNK	NMU
CTNNAL1	KIF14
NAV3	UBE2C
SERPINB6	AUNIP
MAPRE2	ALYREF
LIPA	SLC5A1
GLS	RB1CC1
PEX5L	GAPDH
PLXDC2	HIST1H2AM
LINC01133	KIAA1804
AXL	GPR19
SULF2	PKN1
DPYS	C21orf91
HLF	RFC4
TENC1	GRHL2
SBSPON	ECHDC3
CNRIP1	KLHL14
AKT3	FAM136A
NLGN1	SRD5A1
DPYSL2	BSPRY
APH1B	MRPL3
SEMA3C	SPON1
DTNA	CHSY1
FAM134B	FAM181A
TMEM8B	INPPL1
JAM3	CLEC5A
HNMT	CENPA
TBC1D2B	COL9A1
DOCK10	ACTL6A
CGNL1	GPR39
SHOX2	DLGAP5
TMEM163	EIF2S2
ARHGAP44	CDK1
HSPB3	KLHL24
SLC16A1	FOLR3
SLC2A5	KRTCAP3
MUM1	FOXM1
DENND5B	HK2
DCN	HDGF
PCDH9	ASS1
NT5E	PSMD14
RGS5	CP
DIRAS3	ANLN
PSD3	CSE1L
CCDC64	NUDT15
FRAS1	TRIP13
CLMP	XPO5
TBC1D4	NDUFA13
AMT	SIX4
ZDHHC2	MRPS17
DAPK1	PAX8
SNX7	IFI27
SORBS2	PBK
BIRC3	SDC1
OLFML1	FZD5
RUNDC3B	SLC44A4
PRKACB	COMMD5
CLK1	TM7SF2
KCNB1	CEP55
NFKBIZ	CLDN4
P2RX7	TMEM79
AOX1	C20orf24
MAP3K8	TMPRSS3
MTMR11	SNRNP25
DST	PRC1
CPED1	HIST1H2BD
CYP27A1	THEM6
TVP23A	LACTB2
BNC1	CCDC113
GFRA1	ENDOG
DSE	ESRP1
GATA6	SASS6
ADH1B	DDRGK1
AMIGO2	SORT1
PCED1B	TATDN1
LPAR1	GTF2IRD1
GAS7	XKR4
DSCAML1	KCNH2
TRIM61	ATP6V0B
NXPH2	ALDOA
C7	PRORSD1P
LHFP	LMNB1
VIM	TIGD1
TCTN1	MDK
LOC440434	NDUFS6
LAMA2	RTKN
NUMB	RAD54B
WRB	RASAL1
C21orf62	NHP2
FAM13C	ELOVL1
PDE4B	KIF15
DAB2	MRPL11
SMOC2	ZNF623
CNIH3	C2orf88
HHIP	LAMC1
ZBTB16	C1orf116
C4BPA	PCNA
TNFAIP8	RAB10
WNT2B	C12orf56
LEPR	C15orf48
ATP8B2	MTHFD1
FAM13B	COX6C
TNFSF13B	EHF
ADCYAP1	CLDN10
SYNPO2	ESRP2
SECISBP2	PUS1
CCDC68	STON2
CNTN4	MACC1
MEGF6	TAF4B
SMAD9	GTF2H4
PROCR	VRK1
PPAP2A	S100A13
PTGDR	VAX2
ANGPTL1	NPTX2
SCN1B	MFAP2
IRX5	ALG3
LHX2	MRPL15
MALAT1	EPHX4
KCNK6	TMTC4
FOXL2	ECT2
EFNA5	PLS1
HOXD9	ETV6
CDC14A	ELOVL6
PTPRN2	DDX39A
C10orf32	BYSL
MDFIC	NETO2
SREK1	CDCA3
KLF9	CDCA8
TDRD10	DNA2
RORB	STC2
DYNC2H1	FAM174B
SVEP1	DCDC2
SERPING1	E2F7
VCAM1	POR
FLRT2	SAPCD2
CACNB2	C1orf106
ACPP	GMEB2
SIRPA	FBLN2
CREBL2	TIMMDC1
TLE2	MAD1L1
SOCS2	CSNK2A1
PRDM5	PSMD2
RUNX1T1	CELSR2
SDC2	INHBB
IL6ST	VSIG10
GREB1	LINC01215
BICC1	PANK1
PTHLH	CDC20
DPYD	RCN2
TMEM200B	PTPLB
DRAM1	ST3GAL6
TMOD2	GRHL1
HSD11B1	SS18L1
SLC25A21	ST6GALNAC1
DFNA5	SLC7A5
CAV2	DCAF13
C10orf54	LPCAT1
S100PBP	KRT23
ABCA9	BUB1
TRIM22	TTK
RGS4	XXYLT1
C16orf54	BUB1B
ELAVL2	SLC34A2
MEF2C	FAM107A
PPM1K	TRAPPC3
C3	PFKP
SMPD3	SCRIB
ID3	PARPBP
BCHE	NDC80
NSUN6	LPAR3
GHR	MEOX1
UNC5D	BEND3
LRP2	UGT8
REEP1	CORO2A
RPL23AP32	CEMIP
KLHDC1	CMC2
SEPP1	AGO2
TXNIP	NRAS
TLR1	PFDN4
PLA2R1	MAGEF1
GYPC	SLC52A2
KCNJ8	ISG15
MTURN	GNAI3
SRGAP2	ASRGL1
CELF2	ZNF682
SPOCK2	ATP5J
NPNT	ATP6V0E2
CLDN1	MAL
INTU	HSPE1
LY96	TMEM185B
ANTXR2	NOV
SSBP3-AS1	SLC39A7
CLDN11	NUDT1
GBGT1	FZD2
FBXL7	DEPDC1
PLXNA4	GLDC
FAS	APOA1
PAQR7	HJURP
SGCG	POU2F3
DISP1	MRPL36
LOC646762	BRIP1
CDH11	TMEM68
SPOCK1	RFC3
GNAI1	SGPL1
BBS4	IDH2
HSPB2	AGMAT
SEL1L2	UNC5A
CHST15	PYCR1
PARM1	NOTCH3
DTWD1	KAZN
MICU3	DNAJB11
	MCM6
	PIK3R3
	MIS18A
	CCNA1
	PUS7
	CDCA5
	UBE2S
	BST2
	TTF2
	SCD
	RAD51
	LIPG
	FAM195A
	GPRC5B
	TPI1
	YWHAG
	NELFCD
	LEMD1
	LRRC32
	KIF18A
	ASL
	FOLR1
	CENPM
	FAM171A1
	FJX1
	SMARCC1
	RALY
	USP18
	SCGB1D2
	PVRL3
	DEPDC1B
	SLC3A2
	PCCB
	ADA
	LAMA5
	CDC6
	MRPL34
	EHHADH
	ZBTB42
	IGF2
	RALA
	TOPBP1
	LCN2
	CX3CL1
	ATP6V1B1
	USP39
	NEK2
	TMEM38A
	FOXA3
	FARSA
	SLC39A4
	PRELID1
	TMEM147
	PSRC1
	GPI
	NDUFV1
	GYLTL1B
	DEPTOR
	RPAP3
	ALG6
	PDP1
	LY6K
	SLC25A10
	PXDN
	RUNX3
	SLFN13
	MPP7
	BPGM
	SLC5A3
	ATP5I
	SLC4A11
	TACSTD2
	SBK1
	KIAA0101
	PPP1R16A
	SKA3
	ACP1
	PTH2R
	S100A1
	VTCN1
	CCT5
	PRSS21
	C3orf67
	HMMR
	DNMT3B
	WNT7A
	FUT8
	GOLT1B
	MCM5
	RAD54L
	ZMYND19
	CLPTM1L
	ALDH3B2
	GTPBP3
	ZWINT
	ECI1
	MKI67
	C8orf76
	TCEB1
	YDJC
	GPR160
	HIST1H1C
	MPHOSPH10
	LRPPRC
	BACE2
	BTG3
	FAM90A1
	HYOU1
	MRPS26
	KIF22
	TNFAIP6
	EXOSC4
	RAD21
	TFAP2A
	WDR72
	TBCCD1
	GMPS
	HPDL
	BAK1
	PRSS8
	NXT1
	COX5A
	DNAJC9
	LSG1
	UCP2
	MARS
	SPAG5
	C10orf2
	KIF20B
	MFN1
	FAM117B
	UBE2T
	MTL5
	RNFT2
	MYBL2
	GRAMD2
	ZNHIT1
	WDHD1
	MAF1
	MTF2
	MTX2
	RGCC
	HENMT1
	RNF44
	NTHL1
	BHLHE41
	EIF6
	DHRS11
	RGS1
	PUF60
	DPH2
	NRTN
	TRMT12
	S100A14
	KIF20A
	EIF4G1
	SYNE4
	FANCG
	KIF2C
	CDH6
	DHTKD1
	CEP76
	NME1
	ZDHHC16
	GINS2
	ITGB6
	MCAM
	SCGB2A1
	MRPL37
	RECQL4
	COX5B
	WDR34
	COL4A1
	SPATA17
	HES6
	CMTM6
	TTI1
	DPY19L4
	TSTA3
	CASC5
	ZNF367
	MRPL42
	KLK7
	CDCA4
	PSENEN
	SMIM22
	AIF1L
	MLF2
	ZFP69B
	TACC3
	CENPE
	MTFR2
	FBXO6
	CCNB2
	TIMELESS
	NOX4
	SEPHS1
	ZMYM1
	KIAA1524
	BIRC5
	PROM2
	NPM3
	PSMB5
	TPD52L2
	YARS2
	CTCFL
	RUVBL1
	ITGB8
	STX6
	GREM1
	CHCHD7
	CCL20
	ARHGAP11A
	TRUB2
	JAG2
	PEA15
	PSAT1
	FIBP
	CRABP2
	CTHRC1
	RBBP8
	GOT1
	TMEM69
	KLK5
	PEG10
