# Supplementary material for: The Expression and Role Analysis of Methylation-Regulated Differentially Expressed Gene UBE2C in Pan-Cancer, Especially for HGSOC
Source: Cancers (Basel). 2022 Jun 25;14(13):3121. doi: 10.3390/cancers14133121 (PMC9264902; doi:10.3390/cancers14133121)
Supplement: Supplementary file 1 [file cancers-14-03121-s001.zip › Table S8. GO analysis of the hub genes.xls]

## Sheet: BP_result
ID	Term	Ontology	Count	Size	numInt	numTotal	p_value	fdr	Enrichment_Score	Fold_Enrichment	GeneRatio	Genes
GO:0000278	mitotic_cell_cycle	Biological Process	39	684	46	17492	1.7876e-48	1.50158e-45	47.7477	21.6815	0.847826	AURKA//AURKB//BIRC5//BUB1//BUB1B//CCNA2//CCNB1//CCNB2//CDC20//CDCA5//CDCA8//CDK1//CENPA//CENPE//CENPF//CEP55//DLGAP5//ESPL1//KIF11//KIF15//KIF18A//KIF20A//KIF23//KIF2C//MAD1L1//MAD2L1//MELK//NCAPG//NDC80//NEK2//PBK//PRC1//RRM2//SPAG5//SPC25//TPX2//TTK//UB
GO:0051301	cell_division	Biological Process	36	486	46	17492	8.22364e-48	3.45393e-45	47.0849	28.1675	0.782609	AURKA//AURKB//BIRC5//BUB1//BUB1B//CCNA2//CCNB1//CCNB2//CDC20//CDCA3//CDCA5//CDCA8//CDK1//CENPA//CENPE//CENPF//CEP55//ESPL1//KIF11//KIF20A//KIF23//KIF2C//MAD1L1//MAD2L1//NCAPG//NDC80//NEK2//PRC1//PTTG1//RAD21//RCC2//SPAG5//SPC25//TPX2//UBE2C//ZWINT
GO:0007049	cell_cycle	Biological Process	44	1332	46	17492	2.84951e-47	7.97863e-45	46.5452	12.5612	0.956522	AURKA//AURKB//BIRC5//BUB1//BUB1B//CCNA2//CCNB1//CCNB2//CDC20//CDCA3//CDCA5//CDCA8//CDK1//CENPA//CENPE//CENPF//CEP55//DLGAP5//ESPL1//KIF11//KIF15//KIF18A//KIF20A//KIF23//KIF2C//MAD1L1//MAD2L1//MELK//MKI67//NCAPG//NDC80//NEK2//PBK//PRC1//PTTG1//RAD21//RCC2/
GO:0007059	chromosome_segregation	Biological Process	29	275	46	17492	1.533e-41	3.21929e-39	40.8145	40.1002	0.630435	AURKB//BIRC5//BUB1//BUB1B//CCNB1//CDC20//CDCA5//CDCA8//CENPE//CENPF//CENPN//CEP55//DLGAP5//ESPL1//KIF18A//KIF23//KIF2C//MAD1L1//MAD2L1//NCAPG//NDC80//NEK2//PRC1//PTTG1//RAD21//SPAG5//SPC25//TTK//ZWINT
GO:0140014	mitotic_nuclear_division	Biological Process	25	146	46	17492	7.56699e-41	1.27125e-38	40.1211	65.1132	0.543478	AURKA//AURKB//BIRC5//CCNB1//CDC20//CDCA5//CDCA8//CENPE//CEP55//DLGAP5//ESPL1//KIF11//KIF18A//KIF23//KIF2C//MAD1L1//MAD2L1//NCAPG//NDC80//NEK2//PRC1//SPAG5//TPX2//UBE2C//ZWINT
GO:0098813	nuclear_chromosome_segregation	Biological Process	26	217	46	17492	2.63942e-38	3.69519e-36	37.5785	45.5612	0.565217	AURKB//BUB1//BUB1B//CCNB1//CDC20//CDCA5//CDCA8//CENPE//CENPF//CEP55//DLGAP5//ESPL1//KIF18A//KIF23//KIF2C//MAD1L1//MAD2L1//NCAPG//NDC80//NEK2//PRC1//PTTG1//RAD21//SPAG5//TTK//ZWINT
GO:0000819	sister_chromatid_segregation	Biological Process	23	141	46	17492	7.57388e-37	9.08865e-35	36.1207	62.0284	0.5	AURKB//BUB1//BUB1B//CCNB1//CDC20//CDCA5//CDCA8//CENPE//CEP55//DLGAP5//ESPL1//KIF18A//KIF23//KIF2C//MAD1L1//MAD2L1//NCAPG//NDC80//NEK2//PRC1//RAD21//SPAG5//ZWINT
GO:0051983	regulation_of_chromosome_segregation	Biological Process	21	104	46	17492	1.30162e-35	1.3667e-33	34.8855	76.7834	0.456522	AURKB//BUB1//BUB1B//CCNB1//CDC20//CDCA5//CENPE//CENPF//DLGAP5//ESPL1//KIF2C//MAD1L1//MAD2L1//MKI67//NDC80//NEK2//PTTG1//RAD21//RCC2//SPAG5//TTK
GO:0000070	mitotic_sister_chromatid_segregation	Biological Process	20	108	46	17492	4.96852e-33	4.63729e-31	32.3038	70.4187	0.434783	AURKB//CCNB1//CDC20//CDCA5//CDCA8//CENPE//CEP55//DLGAP5//ESPL1//KIF18A//KIF23//KIF2C//MAD1L1//MAD2L1//NCAPG//NDC80//NEK2//PRC1//SPAG5//ZWINT
GO:0007088	regulation_of_mitotic_nuclear_division	Biological Process	21	167	46	17492	5.85157e-31	4.91532e-29	30.2327	47.8172	0.456522	AURKA//AURKB//BUB1//BUB1B//CCNB1//CDC20//CDCA5//CENPE//CENPF//DLGAP5//ESPL1//KIF11//MAD1L1//MAD2L1//MKI67//NDC80//NEK2//PTTG1//RAD21//TTK//UBE2C
GO:0010564	regulation_of_cell_cycle_process	Biological Process	29	747	46	17492	9.96435e-29	7.60914e-27	28.0016	14.7625	0.630435	AURKA//AURKB//BUB1//BUB1B//CCNB1//CDC20//CDCA5//CDK1//CENPE//CENPF//DLGAP5//ESPL1//KIF11//KIF20A//KIF23//MAD1L1//MAD2L1//MKI67//NDC80//NEK2//PRC1//PTTG1//RAD21//RCC2//RRM2//SPAG5//TPX2//TTK//UBE2C
GO:0051276	chromosome_organization	Biological Process	31	1049	46	17492	1.83439e-27	1.28407e-25	26.7365	11.2375	0.673913	AURKA//AURKB//BUB1//BUB1B//CCNA2//CCNB1//CDC20//CDCA5//CDCA8//CDK1//CENPA//CENPE//CENPF//CENPM//CENPN//CEP55//DLGAP5//ESPL1//KIF18A//KIF23//KIF2C//MAD1L1//MAD2L1//NCAPG//NDC80//NEK2//PRC1//PTTG1//RAD21//SPAG5//ZWINT
GO:0051726	regulation_of_cell_cycle	Biological Process	32	1185	46	17492	2.48129e-27	1.60329e-25	26.6053	10.2686	0.695652	AURKA//AURKB//BUB1//BUB1B//CCNA2//CCNB1//CCNB2//CDC20//CDCA5//CDK1//CENPE//CENPF//DLGAP5//ESPL1//KIF11//KIF20A//KIF23//MAD1L1//MAD2L1//MKI67//NDC80//NEK2//PRC1//PTTG1//RAD21//RCC2//RRM2//SPAG5//TPX2//TTK//UBE2C//ZWINT
GO:0010965	regulation_of_mitotic_sister_chromatid_separation	Biological Process	15	59	46	17492	5.68399e-27	3.41039e-25	26.2453	96.6765	0.326087	AURKB//BUB1//BUB1B//CCNB1//CDC20//CENPE//CENPF//DLGAP5//ESPL1//MAD1L1//MAD2L1//NDC80//PTTG1//RAD21//TTK
GO:1902850	microtubule_cytoskeleton_organization_involved_in_mitosis	Biological Process	17	106	46	17492	7.92331e-27	4.43706e-25	26.1011	60.9852	0.369565	AURKA//AURKB//BIRC5//CCNB1//CDC20//CENPA//CENPE//ESPL1//KIF11//KIF23//MAD2L1//NDC80//NEK2//PRC1//SPC25//TPX2//TTK
GO:0033045	regulation_of_sister_chromatid_segregation	Biological Process	16	82	46	17492	1.01993e-26	5.35463e-25	25.9914	74.1972	0.347826	AURKB//BUB1//BUB1B//CCNB1//CDC20//CDCA5//CENPE//CENPF//DLGAP5//ESPL1//MAD1L1//MAD2L1//NDC80//PTTG1//RAD21//TTK
GO:1905818	regulation_of_chromosome_separation	Biological Process	15	64	46	17492	2.25382e-26	1.11365e-24	25.6471	89.1236	0.326087	AURKB//BUB1//BUB1B//CCNB1//CDC20//CENPE//CENPF//DLGAP5//ESPL1//MAD1L1//MAD2L1//NDC80//PTTG1//RAD21//TTK
GO:0030071	regulation_of_mitotic_metaphase|anaphase_transition	Biological Process	14	53	46	17492	1.88297e-25	8.78719e-24	24.7252	100.446	0.304348	AURKB//BUB1//BUB1B//CCNB1//CDC20//CENPE//CENPF//DLGAP5//ESPL1//MAD1L1//MAD2L1//NDC80//RAD21//TTK
GO:0007346	regulation_of_mitotic_cell_cycle	Biological Process	25	631	46	17492	1.82024e-24	8.04738e-23	23.7399	15.0658	0.543478	AURKA//AURKB//BUB1//BUB1B//CCNB1//CDC20//CDCA5//CDK1//CENPE//CENPF//DLGAP5//ESPL1//KIF11//MAD1L1//MAD2L1//MKI67//NDC80//NEK2//PTTG1//RAD21//RCC2//TPX2//TTK//UBE2C//ZWINT
GO:0007052	mitotic_spindle_organization	Biological Process	14	76	46	17492	5.17499e-23	2.1735e-21	22.2861	70.0481	0.304348	AURKA//AURKB//BIRC5//CCNB1//CDC20//CENPE//KIF11//KIF23//NDC80//NEK2//PRC1//SPC25//TPX2//TTK
GO:0000226	microtubule_cytoskeleton_organization	Biological Process	22	478	46	17492	1.07431e-22	4.29723e-21	21.9689	17.5015	0.478261	AURKA//AURKB//BIRC5//CCNB1//CDC20//CDK1//CENPA//CENPE//ESPL1//KIF11//KIF18A//KIF20A//KIF23//KIF2C//MAD2L1//NDC80//NEK2//PRC1//SPAG5//SPC25//TPX2//TTK
GO:1901990	regulation_of_mitotic_cell_cycle_phase_transition	Biological Process	21	409	46	17492	1.36108e-22	5.19686e-21	21.8661	19.5244	0.456522	AURKA//AURKB//BUB1//BUB1B//CCNB1//CDC20//CDCA5//CDK1//CENPE//CENPF//DLGAP5//ESPL1//MAD1L1//MAD2L1//NDC80//NEK2//RAD21//RCC2//TPX2//TTK//UBE2C
GO:0007017	microtubule-based_process	Biological Process	24	665	46	17492	1.98828e-22	7.26154e-21	21.7015	13.7237	0.521739	AURKA//AURKB//BIRC5//CCNB1//CDC20//CDK1//CENPA//CENPE//DLGAP5//ESPL1//KIF11//KIF15//KIF18A//KIF20A//KIF23//KIF2C//MAD2L1//NDC80//NEK2//PRC1//SPAG5//SPC25//TPX2//TTK
GO:0007051	spindle_organization	Biological Process	16	154	46	17492	4.64051e-22	1.62418e-20	21.3334	39.5076	0.347826	AURKA//AURKB//BIRC5//CCNB1//CDC20//CENPE//ESPL1//KIF11//KIF23//NDC80//NEK2//PRC1//SPAG5//SPC25//TPX2//TTK
GO:1901987	regulation_of_cell_cycle_phase_transition	Biological Process	21	443	46	17492	7.23174e-22	2.42987e-20	21.1408	18.0259	0.456522	AURKA//AURKB//BUB1//BUB1B//CCNB1//CDC20//CDCA5//CDK1//CENPE//CENPF//DLGAP5//ESPL1//MAD1L1//MAD2L1//NDC80//NEK2//RAD21//RCC2//TPX2//TTK//UBE2C
GO:0006996	organelle_organization	Biological Process	39	3375	46	17492	1.43347e-21	4.63121e-20	20.8436	4.39413	0.847826	AURKA//AURKB//BIRC5//BUB1//BUB1B//CCNA2//CCNB1//CCNB2//CDC20//CDCA5//CDCA8//CDK1//CENPA//CENPE//CENPF//CENPM//CENPN//CEP55//DLGAP5//ESPL1//KIF11//KIF18A//KIF20A//KIF23//KIF2C//MAD1L1//MAD2L1//NCAPG//NDC80//NEK2//PRC1//PTTG1//RAD21//SPAG5//SPC25//TPX2//TTK
GO:2000816	negative_regulation_of_mitotic_sister_chromatid_separation	Biological Process	10	29	46	17492	1.06898e-19	3.32573e-18	18.971	131.124	0.217391	AURKB//BUB1//BUB1B//CDC20//CENPF//MAD1L1//MAD2L1//PTTG1//RAD21//TTK
GO:0033044	regulation_of_chromosome_organization	Biological Process	18	351	46	17492	3.04942e-19	9.14827e-18	18.5158	19.5006	0.391304	AURKB//BUB1//BUB1B//CCNB1//CDC20//CDCA5//CENPE//CENPF//DLGAP5//ESPL1//MAD1L1//MAD2L1//MKI67//NDC80//NEK2//PTTG1//RAD21//TTK
GO:0045839	negative_regulation_of_mitotic_nuclear_division	Biological Process	10	42	46	17492	7.66381e-18	2.21329e-16	17.1156	90.5383	0.217391	AURKB//BUB1//BUB1B//CDC20//CENPF//MAD1L1//MAD2L1//PTTG1//RAD21//TTK
GO:0045841	negative_regulation_of_mitotic_metaphase|anaphase_transition	Biological Process	9	26	46	17492	7.90459e-18	2.21329e-16	17.1021	131.629	0.195652	AURKB//BUB1//BUB1B//CDC20//CENPF//MAD1L1//MAD2L1//RAD21//TTK
GO:0051303	establishment_of_chromosome_localization	Biological Process	11	73	46	17492	3.61586e-17	9.79781e-16	16.4418	57.2996	0.23913	CCNB1//CDCA5//CDCA8//CENPE//CENPF//CEP55//DLGAP5//KIF18A//KIF2C//MAD1L1//NDC80
GO:0010948	negative_regulation_of_cell_cycle_process	Biological Process	16	318	46	17492	5.92141e-17	1.55437e-15	16.2276	19.1326	0.347826	AURKA//AURKB//BUB1//BUB1B//CCNB1//CDC20//CDK1//CENPF//ESPL1//MAD1L1//MAD2L1//NEK2//PTTG1//RAD21//RRM2//TTK
GO:0051649	establishment_of_localization_in_cell	Biological Process	17	392	46	17492	6.21246e-17	1.58135e-15	16.2067	16.4909	0.369565	CCNB1//CDCA5//CDCA8//CENPA//CENPE//CENPF//CEP55//DLGAP5//ESPL1//KIF18A//KIF23//KIF2C//MAD1L1//MAD2L1//NDC80//SPAG5//ZWINT
GO:0051640	organelle_localization	Biological Process	19	578	46	17492	9.85723e-17	2.43532e-15	16.0062	12.4999	0.413043	AURKA//CCNB1//CDCA5//CDCA8//CDK1//CENPA//CENPE//CENPF//CEP55//DLGAP5//ESPL1//KIF18A//KIF23//KIF2C//MAD1L1//MAD2L1//NDC80//NEK2//SPAG5
GO:0051310	metaphase_plate_congression	Biological Process	10	55	46	17492	1.48667e-16	3.568e-15	15.8278	69.1383	0.217391	CCNB1//CDCA5//CDCA8//CENPE//CENPF//CEP55//KIF18A//KIF2C//MAD1L1//NDC80
GO:0051656	establishment_of_organelle_localization	Biological Process	16	366	46	17492	5.46025e-16	1.27406e-14	15.2628	16.6234	0.347826	CCNB1//CDCA5//CDCA8//CENPA//CENPE//CENPF//CEP55//DLGAP5//ESPL1//KIF18A//KIF23//KIF2C//MAD1L1//MAD2L1//NDC80//SPAG5
GO:0007094	mitotic_spindle_assembly_checkpoint	Biological Process	8	24	46	17492	8.57342e-16	1.9464e-14	15.0668	126.754	0.173913	AURKB//BUB1//BUB1B//CDC20//CENPF//MAD1L1//MAD2L1//TTK
GO:0033043	regulation_of_organelle_organization	Biological Process	24	1297	46	17492	1.00217e-15	2.21532e-14	14.9991	7.03644	0.521739	AURKA//AURKB//BUB1//BUB1B//CCNB1//CDC20//CDCA5//CENPE//CENPF//DLGAP5//ESPL1//KIF11//KIF18A//MAD1L1//MAD2L1//MKI67//NDC80//NEK2//PTTG1//RAD21//SPAG5//TPX2//TTK//UBE2C
GO:0007080	mitotic_metaphase_plate_congression	Biological Process	9	46	46	17492	2.6828e-15	5.77833e-14	14.5714	74.3989	0.195652	CCNB1//CDCA5//CDCA8//CENPE//CEP55//KIF18A//KIF2C//MAD1L1//NDC80
GO:0007093	mitotic_cell_cycle_checkpoint	Biological Process	12	153	46	17492	3.90246e-15	8.19516e-14	14.4087	29.8244	0.26087	AURKA//AURKB//BUB1//BUB1B//CCNB1//CDC20//CDK1//CENPF//MAD1L1//MAD2L1//TTK//ZWINT
GO:0007010	cytoskeleton_organization	Biological Process	22	1100	46	17492	5.56695e-15	1.14055e-13	14.2544	7.60522	0.478261	AURKA//AURKB//BIRC5//CCNB1//CDC20//CDK1//CENPA//CENPE//ESPL1//KIF11//KIF18A//KIF20A//KIF23//KIF2C//MAD2L1//NDC80//NEK2//PRC1//SPAG5//SPC25//TPX2//TTK
GO:0090068	positive_regulation_of_cell_cycle_process	Biological Process	14	281	46	17492	8.35406e-15	1.67081e-13	14.0781	18.9454	0.304348	AURKA//AURKB//CCNB1//CDCA5//CDK1//DLGAP5//ESPL1//KIF23//MAD2L1//NDC80//RAD21//RCC2//SPAG5//UBE2C
GO:0045930	negative_regulation_of_mitotic_cell_cycle	Biological Process	14	304	46	17492	2.47694e-14	4.83868e-13	13.6061	17.512	0.304348	AURKA//AURKB//BUB1//BUB1B//CCNB1//CDC20//CDK1//CENPF//MAD1L1//MAD2L1//PTTG1//RAD21//TTK//ZWINT
GO:0045786	negative_regulation_of_cell_cycle	Biological Process	17	566	46	17492	2.70054e-14	5.15558e-13	13.5685	11.4213	0.369565	AURKA//AURKB//BUB1//BUB1B//CCNB1//CDC20//CDK1//CENPF//ESPL1//MAD1L1//MAD2L1//NEK2//PTTG1//RAD21//RRM2//TTK//ZWINT
GO:2001251	negative_regulation_of_chromosome_organization	Biological Process	11	134	46	17492	3.73246e-14	6.96725e-13	13.428	31.2154	0.23913	AURKB//BUB1//BUB1B//CDC20//CENPF//ESPL1//MAD1L1//MAD2L1//PTTG1//RAD21//TTK
GO:1901991	negative_regulation_of_mitotic_cell_cycle_phase_transition	Biological Process	12	212	46	17492	1.99157e-13	3.63677e-12	12.7008	21.5242	0.26087	AURKA//AURKB//BUB1//BUB1B//CCNB1//CDC20//CDK1//CENPF//MAD1L1//MAD2L1//RAD21//TTK
GO:0045787	positive_regulation_of_cell_cycle	Biological Process	14	374	46	17492	4.22784e-13	7.55614e-12	12.3739	14.2344	0.304348	AURKA//AURKB//CCNB1//CDCA5//CDK1//DLGAP5//ESPL1//KIF23//MAD2L1//NDC80//RAD21//RCC2//SPAG5//UBE2C
GO:0031145	anaphase-promoting_complex-dependent_catabolic_process	Biological Process	9	81	46	17492	5.94211e-13	1.03987e-11	12.2261	42.2512	0.195652	AURKA//AURKB//BUB1B//CCNB1//CDC20//CDK1//MAD2L1//PTTG1//UBE2C
GO:0045931	positive_regulation_of_mitotic_cell_cycle	Biological Process	10	150	46	17492	4.9723e-12	8.52394e-11	11.3034	25.3507	0.217391	AURKA//CCNB1//CDCA5//CDK1//DLGAP5//ESPL1//MAD2L1//NDC80//RCC2//UBE2C
GO:0090307	mitotic_spindle_assembly	Biological Process	7	38	46	17492	6.40308e-12	1.07572e-10	11.1936	70.0481	0.152174	AURKB//BIRC5//CDC20//KIF11//KIF23//NEK2//TPX2
GO:0051128	regulation_of_cellular_component_organization	Biological Process	25	2477	46	17492	1.79361e-10	2.95417e-09	9.74627	3.83792	0.543478	AURKA//AURKB//BUB1//BUB1B//CCNB1//CDC20//CDCA5//CENPE//CENPF//DLGAP5//ESPL1//KIF11//KIF18A//MAD1L1//MAD2L1//MKI67//NDC80//NEK2//PTTG1//RAD21//RCC2//SPAG5//TPX2//TTK//UBE2C
GO:0051225	spindle_assembly	Biological Process	8	100	46	17492	1.87235e-10	3.02456e-09	9.72761	30.4209	0.173913	AURKA//AURKB//BIRC5//CDC20//KIF11//KIF23//NEK2//TPX2
GO:0071459	protein_localization_to_chromosome,_centromeric_region	Biological Process	5	17	46	17492	6.07505e-10	9.62838e-09	9.21645	111.841	0.108696	AURKB//CDK1//CENPA//RCC2//TTK
GO:0051383	kinetochore_organization	Biological Process	5	18	46	17492	8.39518e-10	1.30592e-08	9.07597	105.628	0.108696	CENPA//CENPE//CENPF//CENPN//NDC80
GO:1901992	positive_regulation_of_mitotic_cell_cycle_phase_transition	Biological Process	7	77	46	17492	1.13053e-09	1.72662e-08	8.94672	34.5692	0.152174	CCNB1//CDCA5//CDK1//DLGAP5//ESPL1//RCC2//UBE2C
GO:0010389	regulation_of_G2|M_transition_of_mitotic_cell_cycle	Biological Process	9	193	46	17492	1.55739e-09	2.33609e-08	8.8076	17.7324	0.195652	AURKA//AURKB//CCNB1//CDK1//CENPF//NEK2//RAD21//RCC2//TPX2
GO:0008608	attachment_of_spindle_microtubules_to_kinetochore	Biological Process	5	21	46	17492	1.98219e-09	2.92112e-08	8.70285	90.5383	0.108696	AURKB//CENPE//KIF2C//MAD1L1//NDC80
GO:1902749	regulation_of_cell_cycle_G2|M_phase_transition	Biological Process	9	210	46	17492	3.27296e-09	4.74016e-08	8.48506	16.2969	0.195652	AURKA//AURKB//CCNB1//CDK1//CENPF//NEK2//RAD21//RCC2//TPX2
GO:1901989	positive_regulation_of_cell_cycle_phase_transition	Biological Process	7	93	46	17492	4.31639e-09	6.14537e-08	8.36488	28.6218	0.152174	CCNB1//CDCA5//CDK1//DLGAP5//ESPL1//RCC2//UBE2C
GO:0051321	meiotic_cell_cycle	Biological Process	9	218	46	17492	4.54167e-09	6.35833e-08	8.34278	15.6988	0.195652	AURKA//BUB1//BUB1B//ESPL1//KIF18A//NEK2//PTTG1//RAD21//TTK
GO:0051984	positive_regulation_of_chromosome_segregation	Biological Process	5	28	46	17492	9.44328e-09	1.30039e-07	8.02488	67.9037	0.108696	CCNB1//DLGAP5//ESPL1//RAD21//RCC2
GO:0016572	histone_phosphorylation	Biological Process	5	29	46	17492	1.13883e-08	1.54294e-07	7.94354	65.5622	0.108696	AURKA//AURKB//CCNA2//CCNB1//CDK1
GO:0034502	protein_localization_to_chromosome	Biological Process	6	62	46	17492	1.29781e-08	1.73041e-07	7.88679	36.7994	0.130435	AURKB//CDK1//CENPA//RAD21//RCC2//TTK
GO:0051315	attachment_of_mitotic_spindle_microtubules_to_kinetochore	Biological Process	4	11	46	17492	1.36254e-08	1.78834e-07	7.86565	138.277	0.0869565	CENPE//KIF2C//MAD1L1//NDC80
GO:0051988	regulation_of_attachment_of_spindle_microtubules_to_kinetochore	Biological Process	4	12	46	17492	2.03989e-08	2.63617e-07	7.69039	126.754	0.0869565	CCNB1//NEK2//RCC2//SPAG5
GO:0034501	protein_localization_to_kinetochore	Biological Process	4	13	46	17492	2.94085e-08	3.68703e-07	7.53153	117.003	0.0869565	AURKB//CDK1//RCC2//TTK
GO:0051382	kinetochore_assembly	Biological Process	4	13	46	17492	2.94085e-08	3.68703e-07	7.53153	117.003	0.0869565	CENPA//CENPE//CENPF//CENPN
GO:0044772	mitotic_cell_cycle_phase_transition	Biological Process	9	273	46	17492	3.20245e-08	3.93e-07	7.49452	12.5361	0.195652	AURKA//CCNA2//CCNB1//CCNB2//CDK1//MELK//NEK2//RRM2//UBE2C
GO:0070925	organelle_assembly	Biological Process	13	735	46	17492	3.22822e-08	3.93e-07	7.49104	6.7257	0.282609	AURKA//AURKB//BIRC5//CDC20//CDK1//CENPA//CENPE//CENPF//CENPN//KIF11//KIF23//NEK2//TPX2
GO:0044770	cell_cycle_phase_transition	Biological Process	9	280	46	17492	3.9816e-08	4.77792e-07	7.39994	12.2227	0.195652	AURKA//CCNA2//CCNB1//CCNB2//CDK1//MELK//NEK2//RRM2//UBE2C
GO:0034508	centromere_complex_assembly	Biological Process	5	38	46	17492	4.72954e-08	5.59552e-07	7.32518	50.0343	0.108696	CENPA//CENPE//CENPF//CENPM//CENPN
GO:0000086	G2|M_transition_of_mitotic_cell_cycle	Biological Process	7	135	46	17492	5.80947e-08	6.77771e-07	7.23586	19.7172	0.152174	AURKA//CCNA2//CCNB1//CCNB2//CDK1//MELK//NEK2
GO:0044839	cell_cycle_G2|M_phase_transition	Biological Process	7	137	46	17492	6.42927e-08	7.39807e-07	7.19184	19.4294	0.152174	AURKA//CCNA2//CCNB1//CCNB2//CDK1//MELK//NEK2
GO:0006890	retrograde_vesicle-mediated_transport,_Golgi_to_endoplasmic_reticulum	Biological Process	6	84	46	17492	8.21852e-08	9.32913e-07	7.08521	27.1615	0.130435	CENPE//KIF11//KIF15//KIF18A//KIF23//KIF2C
GO:0051293	establishment_of_spindle_localization	Biological Process	5	46	46	17492	1.27155e-07	1.42413e-06	6.89567	41.3327	0.108696	CENPA//ESPL1//MAD2L1//NDC80//SPAG5
GO:0043161	proteasome-mediated_ubiquitin-dependent_protein_catabolic_process	Biological Process	9	322	46	17492	1.31421e-07	1.45254e-06	6.88134	10.6284	0.195652	AURKA//AURKB//BUB1B//CCNB1//CDC20//CDK1//MAD2L1//PTTG1//UBE2C
GO:0061640	cytoskeleton-dependent_cytokinesis	Biological Process	6	95	46	17492	1.71966e-07	1.876e-06	6.76456	24.0165	0.130435	AURKB//CENPA//CEP55//ESPL1//KIF20A//KIF23
GO:0007062	sister_chromatid_cohesion	Biological Process	5	49	46	17492	1.75853e-07	1.8938e-06	6.75485	38.8021	0.108696	BUB1//BUB1B//CDC20//CDCA5//RAD21
GO:0019886	antigen_processing_and_presentation_of_exogenous_peptide_antigen_via_MHC_class_II	Biological Process	6	98	46	17492	2.07053e-07	2.20158e-06	6.68392	23.2813	0.130435	CENPE//KIF11//KIF15//KIF18A//KIF23//KIF2C
GO:0045840	positive_regulation_of_mitotic_nuclear_division	Biological Process	5	51	46	17492	2.15785e-07	2.22629e-06	6.66598	37.2805	0.108696	AURKA//CDCA5//DLGAP5//ESPL1//UBE2C
GO:0051653	spindle_localization	Biological Process	5	51	46	17492	2.15785e-07	2.22629e-06	6.66598	37.2805	0.108696	CENPA//ESPL1//MAD2L1//NDC80//SPAG5
GO:0002495	antigen_processing_and_presentation_of_peptide_antigen_via_MHC_class_II	Biological Process	6	99	46	17492	2.19979e-07	2.22629e-06	6.65762	23.0461	0.130435	CENPE//KIF11//KIF15//KIF18A//KIF23//KIF2C
GO:0002504	antigen_processing_and_presentation_of_peptide_or_polysaccharide_antigen_via_MHC_class_II	Biological Process	6	99	46	17492	2.19979e-07	2.22629e-06	6.65762	23.0461	0.130435	CENPE//KIF11//KIF15//KIF18A//KIF23//KIF2C
GO:0010498	proteasomal_protein_catabolic_process	Biological Process	9	345	46	17492	2.35714e-07	2.35714e-06	6.62761	9.91985	0.195652	AURKA//AURKB//BUB1B//CCNB1//CDC20//CDK1//MAD2L1//PTTG1//UBE2C
GO:0007063	regulation_of_sister_chromatid_cohesion	Biological Process	4	22	46	17492	2.95711e-07	2.92232e-06	6.52913	69.1383	0.0869565	BUB1//CDCA5//ESPL1//RAD21
GO:0006323	DNA_packaging	Biological Process	7	177	46	17492	3.70151e-07	3.61542e-06	6.43162	15.0386	0.152174	CCNB1//CDCA5//CDK1//CENPA//CENPM//CENPN//NCAPG
GO:0007018	microtubule-based_movement	Biological Process	8	266	46	17492	4.07376e-07	3.93328e-06	6.39001	11.4364	0.173913	CENPE//DLGAP5//KIF11//KIF15//KIF18A//KIF20A//KIF23//KIF2C
GO:0006468	protein_phosphorylation	Biological Process	13	973	46	17492	8.23942e-07	7.8649e-06	6.0841	5.08057	0.282609	AURKA//AURKB//BIRC5//BUB1//BUB1B//CCNA2//CCNB1//CCNB2//CDK1//MELK//NEK2//PBK//TTK
GO:0000281	mitotic_cytokinesis	Biological Process	5	67	46	17492	8.59834e-07	8.11528e-06	6.06559	28.3777	0.108696	CENPA//CEP55//ESPL1//KIF20A//KIF23
GO:0000022	mitotic_spindle_elongation	Biological Process	3	8	46	17492	9.44408e-07	8.71762e-06	6.02484	142.598	0.0652174	AURKB//KIF23//PRC1
GO:0051299	centrosome_separation	Biological Process	3	8	46	17492	9.44408e-07	8.71762e-06	6.02484	142.598	0.0652174	AURKA//KIF11//NEK2
GO:0040001	establishment_of_mitotic_spindle_localization	Biological Process	4	35	46	17492	2.06444e-06	1.88493e-05	5.6852	43.4584	0.0869565	CENPA//ESPL1//MAD2L1//NDC80
GO:0032506	cytokinetic_process	Biological Process	4	36	46	17492	2.31804e-06	2.09372e-05	5.63488	42.2512	0.0869565	AURKB//CEP55//KIF20A//KIF23
GO:0035404	histone-serine_phosphorylation	Biological Process	3	11	46	17492	2.76727e-06	2.47288e-05	5.55795	103.708	0.0652174	AURKA//AURKB//CCNB1
GO:0051294	establishment_of_spindle_orientation	Biological Process	4	38	46	17492	2.89364e-06	2.55859e-05	5.53855	40.0275	0.0869565	CENPA//MAD2L1//NDC80//SPAG5
GO:0032465	regulation_of_cytokinesis	Biological Process	5	88	46	17492	3.3476e-06	2.89896e-05	5.47527	21.6057	0.108696	AURKA//AURKB//KIF20A//KIF23//PRC1
GO:0045132	meiotic_chromosome_segregation	Biological Process	5	88	46	17492	3.3476e-06	2.89896e-05	5.47527	21.6057	0.108696	BUB1//BUB1B//ESPL1//PTTG1//TTK
GO:0010638	positive_regulation_of_organelle_organization	Biological Process	10	617	46	17492	3.58624e-06	3.07392e-05	5.44536	6.16306	0.217391	AURKA//AURKB//CCNB1//CDCA5//DLGAP5//ESPL1//NEK2//RAD21//SPAG5//UBE2C
GO:0007077	mitotic_nuclear_envelope_disassembly	Biological Process	3	12	46	17492	3.6829e-06	3.12488e-05	5.43381	95.0652	0.0652174	CCNB1//CCNB2//CDK1
GO:0030261	chromosome_condensation	Biological Process	4	43	46	17492	4.79159e-06	4.02494e-05	5.31952	35.3731	0.0869565	CCNB1//CDCA5//CDK1//NCAPG
GO:0090266	regulation_of_mitotic_cell_cycle_spindle_assembly_checkpoint	Biological Process	3	14	46	17492	6.07109e-06	5.04922e-05	5.21673	81.4845	0.0652174	CCNB1//MAD2L1//NDC80
GO:2001252	positive_regulation_of_chromosome_organization	Biological Process	6	176	46	17492	6.39141e-06	5.26352e-05	5.1944	12.9634	0.130435	AURKB//CCNB1//DLGAP5//ESPL1//NEK2//RAD21
GO:0006511	ubiquitin-dependent_protein_catabolic_process	Biological Process	9	525	46	17492	7.5539e-06	6.16046e-05	5.12183	6.51876	0.195652	AURKA//AURKB//BUB1B//CCNB1//CDC20//CDK1//MAD2L1//PTTG1//UBE2C
GO:0019941	modification-dependent_protein_catabolic_process	Biological Process	9	531	46	17492	8.27714e-06	6.68538e-05	5.08212	6.4451	0.195652	AURKA//AURKB//BUB1B//CCNB1//CDC20//CDK1//MAD2L1//PTTG1//UBE2C
GO:0051081	nuclear_envelope_disassembly	Biological Process	3	16	46	17492	9.30575e-06	7.4446e-05	5.03125	71.2989	0.0652174	CCNB1//CCNB2//CDK1
GO:0071103	DNA_conformation_change	Biological Process	7	290	46	17492	9.853e-06	7.80804e-05	5.00643	9.17871	0.152174	CCNB1//CDCA5//CDK1//CENPA//CENPM//CENPN//NCAPG
GO:0070507	regulation_of_microtubule_cytoskeleton_organization	Biological Process	6	191	46	17492	1.02067e-05	8.01274e-05	4.99111	11.9454	0.130435	AURKA//KIF11//KIF18A//NEK2//SPAG5//TPX2
GO:0048002	antigen_processing_and_presentation_of_peptide_antigen	Biological Process	6	192	46	17492	1.05153e-05	8.17854e-05	4.97818	11.8832	0.130435	CENPE//KIF11//KIF15//KIF18A//KIF23//KIF2C
GO:0051603	proteolysis_involved_in_cellular_protein_catabolic_process	Biological Process	9	590	46	17492	1.91862e-05	0.000147857	4.71701	5.80059	0.195652	AURKA//AURKB//BUB1B//CCNB1//CDC20//CDK1//MAD2L1//PTTG1//UBE2C
GO:0016310	phosphorylation	Biological Process	13	1303	46	17492	2.03925e-05	0.000155724	4.69053	3.79385	0.282609	AURKA//AURKB//BIRC5//BUB1//BUB1B//CCNA2//CCNB1//CCNB2//CDK1//MELK//NEK2//PBK//TTK
GO:0019882	antigen_processing_and_presentation	Biological Process	6	218	46	17492	2.16113e-05	0.000163545	4.66532	10.4659	0.130435	CENPE//KIF11//KIF15//KIF18A//KIF23//KIF2C
GO:0032886	regulation_of_microtubule-based_process	Biological Process	6	223	46	17492	2.45575e-05	0.000184181	4.60982	10.2312	0.130435	AURKA//KIF11//KIF18A//NEK2//SPAG5//TPX2
GO:1904666	regulation_of_ubiquitin_protein_ligase_activity	Biological Process	3	22	46	17492	2.53093e-05	0.00018814	4.59672	51.8538	0.0652174	CDC20//MAD2L1//UBE2C
GO:0022607	cellular_component_assembly	Biological Process	18	2473	46	17492	2.55779e-05	0.000188469	4.59213	2.76777	0.391304	AURKA//AURKB//BIRC5//CCNB1//CDC20//CDK1//CENPA//CENPE//CENPF//CENPM//CENPN//KIF11//KIF23//NEK2//RCC2//RRM2//TPX2//UBE2C
GO:0044257	cellular_protein_catabolic_process	Biological Process	9	620	46	17492	2.83691e-05	0.000207218	4.54715	5.51992	0.195652	AURKA//AURKB//BUB1B//CCNB1//CDC20//CDK1//MAD2L1//PTTG1//UBE2C
GO:0007079	mitotic_chromosome_movement_towards_spindle_pole	Biological Process	2	4	46	17492	4.04585e-05	0.000290471	4.39299	190.13	0.0434783	CENPE//DLGAP5
GO:0031536	positive_regulation_of_exit_from_mitosis	Biological Process	2	4	46	17492	4.04585e-05	0.000290471	4.39299	190.13	0.0434783	CDCA5//UBE2C
GO:0010971	positive_regulation_of_G2|M_transition_of_mitotic_cell_cycle	Biological Process	3	27	46	17492	4.76304e-05	0.000339064	4.32212	42.2512	0.0652174	CCNB1//CDK1//RCC2
GO:0030163	protein_catabolic_process	Biological Process	9	682	46	17492	5.96142e-05	0.000420806	4.22465	5.01811	0.195652	AURKA//AURKB//BUB1B//CCNB1//CDC20//CDK1//MAD2L1//PTTG1//UBE2C
GO:0007098	centrosome_cycle	Biological Process	4	82	46	17492	6.30123e-05	0.000441086	4.20058	18.5493	0.0869565	AURKA//CDK1//KIF11//NEK2
GO:1902751	positive_regulation_of_cell_cycle_G2|M_phase_transition	Biological Process	3	30	46	17492	6.57483e-05	0.000456024	4.18212	38.0261	0.0652174	CCNB1//CDK1//RCC2
GO:0051754	meiotic_sister_chromatid_cohesion,_centromeric	Biological Process	2	5	46	17492	6.73178e-05	0.000456024	4.17187	152.104	0.0434783	BUB1//BUB1B
GO:0051987	positive_regulation_of_attachment_of_spindle_microtubules_to_kinetochore	Biological Process	2	5	46	17492	6.73178e-05	0.000456024	4.17187	152.104	0.0434783	CCNB1//RCC2
GO:1905448	positive_regulation_of_mitochondrial_ATP_synthesis_coupled_electron_transport	Biological Process	2	5	46	17492	6.73178e-05	0.000456024	4.17187	152.104	0.0434783	CCNB1//CDK1
GO:0051302	regulation_of_cell_division	Biological Process	5	166	46	17492	7.25263e-05	0.000480578	4.1395	11.4536	0.108696	AURKA//AURKB//KIF20A//KIF23//PRC1
GO:0000132	establishment_of_mitotic_spindle_orientation	Biological Process	3	31	46	17492	7.26588e-05	0.000480578	4.13871	36.7994	0.0652174	CENPA//MAD2L1//NDC80
GO:0034080	CENP-A_containing_nucleosome_assembly	Biological Process	3	31	46	17492	7.26588e-05	0.000480578	4.13871	36.7994	0.0652174	CENPA//CENPM//CENPN
GO:0010972	negative_regulation_of_G2|M_transition_of_mitotic_cell_cycle	Biological Process	4	88	46	17492	8.30483e-05	0.000545005	4.08067	17.2846	0.0869565	AURKA//AURKB//CDK1//RAD21
GO:0018105	peptidyl-serine_phosphorylation	Biological Process	5	172	46	17492	8.57903e-05	0.000558634	4.06656	11.0541	0.108696	AURKA//AURKB//CCNB1//CDK1//TTK
GO:0031023	microtubule_organizing_center_organization	Biological Process	4	92	46	17492	9.87512e-05	0.000638085	4.00546	16.5331	0.0869565	AURKA//CDK1//KIF11//NEK2
GO:0007100	mitotic_centrosome_separation	Biological Process	2	6	46	17492	0.000100807	0.000646398	3.99651	126.754	0.0434783	AURKA//KIF11
GO:0046777	protein_autophosphorylation	Biological Process	5	189	46	17492	0.00013366	0.000850561	3.874	10.0598	0.108696	AURKA//AURKB//MELK//NEK2//TTK
GO:1902750	negative_regulation_of_cell_cycle_G2|M_phase_transition	Biological Process	4	100	46	17492	0.000136475	0.000861948	3.86495	15.2104	0.0869565	AURKA//AURKB//CDK1//RAD21
GO:0051256	mitotic_spindle_midzone_assembly	Biological Process	2	7	46	17492	0.000140894	0.000870226	3.85111	108.646	0.0434783	AURKB//KIF23
GO:0090235	regulation_of_metaphase_plate_congression	Biological Process	2	7	46	17492	0.000140894	0.000870226	3.85111	108.646	0.0434783	MAD1L1//SPAG5
GO:0090267	positive_regulation_of_mitotic_cell_cycle_spindle_assembly_checkpoint	Biological Process	2	7	46	17492	0.000140894	0.000870226	3.85111	108.646	0.0434783	MAD2L1//NDC80
GO:0006336	DNA_replication-independent_nucleosome_assembly	Biological Process	3	40	46	17492	0.000157079	0.000963115	3.80388	28.5196	0.0652174	CENPA//CENPM//CENPN
GO:0034724	DNA_replication-independent_nucleosome_organization	Biological Process	3	41	46	17492	0.000169169	0.00102972	3.77168	27.824	0.0652174	CENPA//CENPM//CENPN
GO:0044380	protein_localization_to_cytoskeleton	Biological Process	3	42	46	17492	0.000181847	0.00109893	3.74029	27.1615	0.0652174	AURKA//SPAG5//TTK
GO:0007163	establishment_or_maintenance_of_cell_polarity	Biological Process	5	203	46	17492	0.0001866	0.00111728	3.72909	9.36603	0.108696	CENPA//KIF2C//MAD2L1//NDC80//SPAG5
GO:0051177	meiotic_sister_chromatid_cohesion	Biological Process	2	8	46	17492	0.000187544	0.00111728	3.7269	95.0652	0.0434783	BUB1//BUB1B
GO:0007127	meiosis_I	Biological Process	4	109	46	17492	0.000190313	0.0011258	3.72053	13.9545	0.0869565	AURKA//ESPL1//PTTG1//RAD21
GO:0065004	protein-DNA_complex_assembly	Biological Process	5	211	46	17492	0.000223299	0.00131169	3.65111	9.01092	0.108696	CENPA//CENPE//CENPF//CENPM//CENPN
GO:0006796	phosphate-containing_compound_metabolic_process	Biological Process	15	2137	46	17492	0.000240661	0.00136627	3.61859	2.66912	0.326087	AURKA//AURKB//BIRC5//BUB1//BUB1B//CCNA2//CCNB1//CCNB2//CDK1//DLGAP5//MELK//NEK2//PBK//RRM2//TTK
GO:0045842	positive_regulation_of_mitotic_metaphase|anaphase_transition	Biological Process	2	9	46	17492	0.000240723	0.00136627	3.61848	84.5024	0.0434783	DLGAP5//ESPL1
GO:0046602	regulation_of_mitotic_centrosome_separation	Biological Process	2	9	46	17492	0.000240723	0.00136627	3.61848	84.5024	0.0434783	KIF11//NEK2
GO:1901857	positive_regulation_of_cellular_respiration	Biological Process	2	9	46	17492	0.000240723	0.00136627	3.61848	84.5024	0.0434783	CCNB1//CDK1
GO:1901978	positive_regulation_of_cell_cycle_checkpoint	Biological Process	2	9	46	17492	0.000240723	0.00136627	3.61848	84.5024	0.0434783	MAD2L1//NDC80
GO:0043486	histone_exchange	Biological Process	3	48	46	17492	0.000270967	0.0015276	3.56708	23.7663	0.0652174	CENPA//CENPM//CENPN
GO:0030010	establishment_of_cell_polarity	Biological Process	4	120	46	17492	0.000275153	0.00154086	3.56043	12.6754	0.0869565	CENPA//MAD2L1//NDC80//SPAG5
GO:0051255	spindle_midzone_assembly	Biological Process	2	10	46	17492	0.0003004	0.00166011	3.5223	76.0522	0.0434783	AURKB//KIF23
GO:1903862	positive_regulation_of_oxidative_phosphorylation	Biological Process	2	10	46	17492	0.0003004	0.00166011	3.5223	76.0522	0.0434783	CCNB1//CDK1
GO:0051438	regulation_of_ubiquitin-protein_transferase_activity	Biological Process	3	51	46	17492	0.000324458	0.00178134	3.48884	22.3683	0.0652174	CDC20//MAD2L1//UBE2C
GO:0006508	proteolysis	Biological Process	11	1263	46	17492	0.000337719	0.0018421	3.47144	3.31185	0.23913	AURKA//AURKB//BUB1B//CCNA2//CCNB1//CDC20//CDK1//ESPL1//MAD2L1//PTTG1//UBE2C
GO:0006998	nuclear_envelope_organization	Biological Process	3	52	46	17492	0.000343691	0.00186258	3.46383	21.9381	0.0652174	CCNB1//CCNB2//CDK1
GO:1905820	positive_regulation_of_chromosome_separation	Biological Process	2	11	46	17492	0.000366541	0.00197368	3.43588	69.1383	0.0434783	DLGAP5//ESPL1
GO:0006325	chromatin_organization	Biological Process	8	688	46	17492	0.000381545	0.00203669	3.41845	4.42164	0.173913	AURKA//AURKB//CCNA2//CCNB1//CDK1//CENPA//CENPM//CENPN
GO:0048193	Golgi_vesicle_transport	Biological Process	6	368	46	17492	0.000383092	0.00203669	3.4167	6.19991	0.130435	CENPE//KIF11//KIF15//KIF18A//KIF23//KIF2C
GO:0006997	nucleus_organization	Biological Process	4	132	46	17492	0.000395528	0.00208958	3.40282	11.5231	0.0869565	CCNB1//CCNB2//CDK1//CEP55
GO:0006977	DNA_damage_response,_signal_transduction_by_p53_class_mediator_resulting_in_cell_cycle_arrest	Biological Process	3	56	46	17492	0.000427933	0.00224665	3.36862	20.3711	0.0652174	AURKA//CCNB1//CDK1
GO:0055015	ventricular_cardiac_muscle_cell_development	Biological Process	2	12	46	17492	0.000439112	0.00227688	3.35742	63.3768	0.0434783	CCNB1//CDK1
GO:1904668	positive_regulation_of_ubiquitin_protein_ligase_activity	Biological Process	2	12	46	17492	0.000439112	0.00227688	3.35742	63.3768	0.0434783	CDC20//UBE2C
GO:0072431	signal_transduction_involved_in_mitotic_G1_DNA_damage_checkpoint	Biological Process	3	57	46	17492	0.000450877	0.00232354	3.34594	20.0137	0.0652174	AURKA//CCNB1//CDK1
GO:0046605	regulation_of_centrosome_cycle	Biological Process	3	58	46	17492	0.000474597	0.00243086	3.32367	19.6687	0.0652174	AURKA//KIF11//NEK2
GO:0044265	cellular_macromolecule_catabolic_process	Biological Process	9	905	46	17492	0.000498705	0.00253886	3.30216	3.7816	0.195652	AURKA//AURKB//BUB1B//CCNB1//CDC20//CDK1//MAD2L1//PTTG1//UBE2C
GO:0000212	meiotic_spindle_organization	Biological Process	2	13	46	17492	0.000518082	0.00262162	3.2856	58.5017	0.0434783	AURKA//ESPL1
GO:0033365	protein_localization_to_organelle	Biological Process	8	724	46	17492	0.000535676	0.00269442	3.2711	4.20178	0.173913	AURKA//AURKB//CDK1//CENPA//RAD21//RCC2//SPAG5//TTK
GO:0031571	mitotic_G1_DNA_damage_checkpoint	Biological Process	3	63	46	17492	0.000605211	0.00300815	3.21809	18.1077	0.0652174	AURKA//CCNB1//CDK1
GO:0044819	mitotic_G1|S_transition_checkpoint	Biological Process	3	63	46	17492	0.000605211	0.00300815	3.21809	18.1077	0.0652174	AURKA//CCNB1//CDK1
GO:0044783	G1_DNA_damage_checkpoint	Biological Process	3	64	46	17492	0.00063381	0.00313177	3.19804	17.8247	0.0652174	AURKA//CCNB1//CDK1
GO:0007064	mitotic_sister_chromatid_cohesion	Biological Process	2	15	46	17492	0.000695085	0.00341446	3.15796	50.7014	0.0434783	CDC20//CDCA5
GO:0022414	reproductive_process	Biological Process	11	1403	46	17492	0.000822873	0.00401868	3.08467	2.98138	0.23913	AURKA//BUB1//BUB1B//CCNB1//CDK1//ESPL1//KIF18A//NEK2//PTTG1//RAD21//TTK
GO:0072422	signal_transduction_involved_in_DNA_damage_checkpoint	Biological Process	3	71	46	17492	0.000858361	0.00416777	3.06633	16.0674	0.0652174	AURKA//CCNB1//CDK1
GO:0072395	signal_transduction_involved_in_cell_cycle_checkpoint	Biological Process	3	72	46	17492	0.000894039	0.00421075	3.04864	15.8442	0.0652174	AURKA//CCNB1//CDK1
GO:0007019	microtubule_depolymerization	Biological Process	2	17	46	17492	0.000897291	0.00421075	3.04707	44.7366	0.0434783	KIF18A//KIF2C
GO:0007076	mitotic_chromosome_condensation	Biological Process	2	17	46	17492	0.000897291	0.00421075	3.04707	44.7366	0.0434783	CDCA5//NCAPG
GO:0055012	ventricular_cardiac_muscle_cell_differentiation	Biological Process	2	17	46	17492	0.000897291	0.00421075	3.04707	44.7366	0.0434783	CCNB1//CDK1
GO:0061952	midbody_abscission	Biological Process	2	17	46	17492	0.000897291	0.00421075	3.04707	44.7366	0.0434783	CEP55//KIF20A
GO:1904355	positive_regulation_of_telomere_capping	Biological Process	2	17	46	17492	0.000897291	0.00421075	3.04707	44.7366	0.0434783	AURKB//NEK2
GO:0031100	animal_organ_regeneration	Biological Process	3	73	46	17492	0.000930645	0.00434301	3.03122	15.6272	0.0652174	AURKA//CCNA2//CDK1
GO:0007096	regulation_of_exit_from_mitosis	Biological Process	2	18	46	17492	0.00100776	0.00467691	2.99664	42.2512	0.0434783	CDCA5//UBE2C
GO:0043044	ATP-dependent_chromatin_remodeling	Biological Process	3	77	46	17492	0.00108655	0.00501482	2.96395	14.8154	0.0652174	CENPA//CENPM//CENPN
GO:0030330	DNA_damage_response,_signal_transduction_by_p53_class_mediator	Biological Process	3	78	46	17492	0.00112794	0.00517741	2.94772	14.6254	0.0652174	AURKA//CCNB1//CDK1
GO:0071158	positive_regulation_of_cell_cycle_arrest	Biological Process	3	79	46	17492	0.00117031	0.00534272	2.9317	14.4403	0.0652174	AURKA//CCNB1//CDK1
GO:0071539	protein_localization_to_centrosome	Biological Process	2	21	46	17492	0.00137628	0.00617861	2.86129	36.2153	0.0434783	AURKA//SPAG5
GO:1902410	mitotic_cytokinetic_process	Biological Process	2	21	46	17492	0.00137628	0.00617861	2.86129	36.2153	0.0434783	CEP55//KIF20A
GO:0006464	cellular_protein_modification_process	Biological Process	17	3075	46	17492	0.00138283	0.00617861	2.85923	2.10226	0.369565	AURKA//AURKB//BIRC5//BUB1//BUB1B//CCNA2//CCNB1//CCNB2//CDC20//CDCA3//CDK1//DLGAP5//MELK//NEK2//PBK//TTK//UBE2C
GO:0036211	protein_modification_process	Biological Process	17	3075	46	17492	0.00138283	0.00617861	2.85923	2.10226	0.369565	AURKA//AURKB//BIRC5//BUB1//BUB1B//CCNA2//CCNB1//CCNB2//CDC20//CDCA3//CDK1//DLGAP5//MELK//NEK2//PBK//TTK//UBE2C
GO:0044267	cellular_protein_metabolic_process	Biological Process	19	3693	46	17492	0.00152306	0.00674542	2.81728	1.95639	0.413043	AURKA//AURKB//BIRC5//BUB1//BUB1B//CCNA2//CCNB1//CCNB2//CDC20//CDCA3//CDK1//DLGAP5//MAD2L1//MELK//NEK2//PBK//PTTG1//TTK//UBE2C
GO:1901565	organonitrogen_compound_catabolic_process	Biological Process	9	1059	46	17492	0.00152575	0.00674542	2.81652	3.23168	0.195652	AURKA//AURKB//BUB1B//CCNB1//CDC20//CDK1//MAD2L1//PTTG1//UBE2C
GO:0044773	mitotic_DNA_damage_checkpoint	Biological Process	3	94	46	17492	0.00192994	0.0084877	2.71446	12.136	0.0652174	AURKA//CCNB1//CDK1
GO:0060045	positive_regulation_of_cardiac_muscle_cell_proliferation	Biological Process	2	25	46	17492	0.001953	0.00854437	2.7093	30.4209	0.0434783	CCNB1//CDK1
GO:1904353	regulation_of_telomere_capping	Biological Process	2	26	46	17492	0.00211221	0.00919305	2.67526	29.2508	0.0434783	AURKB//NEK2
GO:0000079	regulation_of_cyclin-dependent_protein_serine|threonine_kinase_activity	Biological Process	3	99	46	17492	0.00223769	0.00968898	2.6502	11.5231	0.0652174	CCNA2//CCNB1//CCNB2
GO:0006915	apoptotic_process	Biological Process	8	905	46	17492	0.00225301	0.00970527	2.64724	3.36142	0.173913	BIRC5//BUB1//BUB1B//CDK1//ESPL1//MELK//RAD21//TPX2
GO:0042770	signal_transduction_in_response_to_DNA_damage	Biological Process	3	102	46	17492	0.00243615	0.0103876	2.6133	11.1841	0.0652174	AURKA//CCNB1//CDK1
GO:2000134	negative_regulation_of_G1|S_transition_of_mitotic_cell_cycle	Biological Process	3	102	46	17492	0.00243615	0.0103876	2.6133	11.1841	0.0652174	AURKA//CCNB1//CDK1
GO:0016570	histone_modification	Biological Process	5	360	46	17492	0.00246299	0.010449	2.60854	5.2814	0.108696	AURKA//AURKB//CCNA2//CCNB1//CDK1
GO:0044774	mitotic_DNA_integrity_checkpoint	Biological Process	3	103	46	17492	0.00250464	0.0105306	2.60125	11.0756	0.0652174	AURKA//CCNB1//CDK1
GO:0051642	centrosome_localization	Biological Process	2	29	46	17492	0.00262544	0.0105306	2.5808	26.2249	0.0434783	AURKA//MAD2L1
GO:0071156	regulation_of_cell_cycle_arrest	Biological Process	3	105	46	17492	0.00264519	0.0105306	2.57754	10.8646	0.0652174	AURKA//CCNB1//CDK1
GO:1902807	negative_regulation_of_cell_cycle_G1|S_phase_transition	Biological Process	3	105	46	17492	0.00264519	0.0105306	2.57754	10.8646	0.0652174	AURKA//CCNB1//CDK1
GO:0008104	protein_localization	Biological Process	13	2135	46	17492	0.00266378	0.0105546	2.5745	2.31541	0.282609	AURKA//AURKB//BIRC5//CDK1//CENPA//CENPF//CEP55//KIF18A//KIF20A//RAD21//RCC2//SPAG5//TTK
GO:0051493	regulation_of_cytoskeleton_organization	Biological Process	6	537	46	17492	0.00268767	0.0105993	2.57062	4.24872	0.130435	AURKA//KIF11//KIF18A//NEK2//SPAG5//TPX2
GO:0016569	covalent_chromatin_modification	Biological Process	5	371	46	17492	0.00280466	0.0108708	2.55212	5.12481	0.108696	AURKA//AURKB//CCNA2//CCNB1//CDK1
GO:0002082	regulation_of_oxidative_phosphorylation	Biological Process	2	30	46	17492	0.00280828	0.0108708	2.55156	25.3507	0.0434783	CCNB1//CDK1
GO:0043457	regulation_of_cellular_respiration	Biological Process	2	30	46	17492	0.00280828	0.0108708	2.55156	25.3507	0.0434783	CCNB1//CDK1
GO:0051304	chromosome_separation	Biological Process	2	30	46	17492	0.00280828	0.0108708	2.55156	25.3507	0.0434783	ESPL1//TTK
GO:0007143	female_meiotic_nuclear_division	Biological Process	2	31	46	17492	0.00299694	0.0114951	2.52332	24.533	0.0434783	AURKA//TTK
GO:0040020	regulation_of_meiotic_nuclear_division	Biological Process	2	31	46	17492	0.00299694	0.0114951	2.52332	24.533	0.0434783	CDC20//TTK
GO:0051443	positive_regulation_of_ubiquitin-protein_transferase_activity	Biological Process	2	32	46	17492	0.0031914	0.0121854	2.49602	23.7663	0.0434783	CDC20//UBE2C
GO:0019538	protein_metabolic_process	Biological Process	20	4267	46	17492	0.00347058	0.0131914	2.4596	1.78233	0.434783	AURKA//AURKB//BIRC5//BUB1//BUB1B//CCNA2//CCNB1//CCNB2//CDC20//CDCA3//CDK1//DLGAP5//ESPL1//MAD2L1//MELK//NEK2//PBK//PTTG1//TTK//UBE2C
GO:0006334	nucleosome_assembly	Biological Process	3	117	46	17492	0.0035909	0.0135515	2.4448	9.75028	0.0652174	CENPA//CENPM//CENPN
GO:0032212	positive_regulation_of_telomere_maintenance_via_telomerase	Biological Process	2	34	46	17492	0.0035976	0.0135515	2.44399	22.3683	0.0434783	AURKB//NEK2
GO:0072331	signal_transduction_by_p53_class_mediator	Biological Process	3	119	46	17492	0.00376607	0.0141228	2.42411	9.58641	0.0652174	AURKA//CCNB1//CDK1
GO:0051261	protein_depolymerization	Biological Process	2	36	46	17492	0.00402661	0.0149662	2.39506	21.1256	0.0434783	KIF18A//KIF2C
GO:0051973	positive_regulation_of_telomerase_activity	Biological Process	2	36	46	17492	0.00402661	0.0149662	2.39506	21.1256	0.0434783	AURKB//NEK2
GO:0060421	positive_regulation_of_heart_growth	Biological Process	2	37	46	17492	0.00424961	0.0155881	2.37165	20.5546	0.0434783	CCNB1//CDK1
GO:0071392	cellular_response_to_estradiol_stimulus	Biological Process	2	37	46	17492	0.00424961	0.0155881	2.37165	20.5546	0.0434783	CCNA2//KIF18A
GO:1904358	positive_regulation_of_telomere_maintenance_via_telomere_lengthening	Biological Process	2	37	46	17492	0.00424961	0.0155881	2.37165	20.5546	0.0434783	AURKB//NEK2
GO:0032467	positive_regulation_of_cytokinesis	Biological Process	2	39	46	17492	0.00471242	0.0171636	2.32676	19.5006	0.0434783	AURKB//KIF23
GO:0007292	female_gamete_generation	Biological Process	3	129	46	17492	0.00471998	0.0171636	2.32606	8.84328	0.0652174	AURKA//CCNB1//TTK
GO:0016202	regulation_of_striated_muscle_tissue_development	Biological Process	3	131	46	17492	0.00492669	0.017838	2.30745	8.70826	0.0652174	CCNB1//CDK1//CENPF
GO:0060043	regulation_of_cardiac_muscle_cell_proliferation	Biological Process	2	40	46	17492	0.00495217	0.0178533	2.3052	19.013	0.0434783	CCNB1//CDK1
GO:0000077	DNA_damage_checkpoint	Biological Process	3	133	46	17492	0.00513879	0.0183847	2.28914	8.57731	0.0652174	AURKA//CCNB1//CDK1
GO:0012501	programmed_cell_death	Biological Process	8	1039	46	17492	0.00524028	0.0183847	2.28065	2.9279	0.173913	BIRC5//BUB1//BUB1B//CDK1//ESPL1//MELK//RAD21//TPX2
GO:0031497	chromatin_assembly	Biological Process	3	134	46	17492	0.00524689	0.0183847	2.2801	8.5133	0.0652174	CENPA//CENPM//CENPN
GO:0048634	regulation_of_muscle_organ_development	Biological Process	3	135	46	17492	0.00535635	0.0186694	2.27113	8.45024	0.0652174	CCNB1//CDK1//CENPF
GO:0055025	positive_regulation_of_cardiac_muscle_tissue_development	Biological Process	2	44	46	17492	0.00596617	0.020709	2.2243	17.2846	0.0434783	CCNB1//CDK1
GO:1903580	positive_regulation_of_ATP_metabolic_process	Biological Process	2	45	46	17492	0.00623327	0.0215471	2.20528	16.9005	0.0434783	CCNB1//CDK1
GO:0032268	regulation_of_cellular_protein_metabolic_process	Biological Process	14	2643	46	17492	0.00636393	0.0219086	2.19627	2.01425	0.304348	AURKA//BIRC5//CCNA2//CCNB1//CCNB2//CDC20//CDK1//CENPE//MAD2L1//PBK//PTTG1//TPX2//TTK//UBE2C
GO:0008219	cell_death	Biological Process	8	1075	46	17492	0.00641492	0.021994	2.19281	2.82985	0.173913	BIRC5//BUB1//BUB1B//CDK1//ESPL1//MELK//RAD21//TPX2
GO:0048538	thymus_development	Biological Process	2	47	46	17492	0.00678359	0.0231635	2.16854	16.1813	0.0434783	CCNB2//MAD1L1
GO:2000045	regulation_of_G1|S_transition_of_mitotic_cell_cycle	Biological Process	3	149	46	17492	0.00703477	0.0239239	2.15275	7.65626	0.0652174	AURKA//CCNB1//CDK1
GO:0046622	positive_regulation_of_organ_growth	Biological Process	2	48	46	17492	0.00706674	0.0239357	2.15078	15.8442	0.0434783	CCNB1//CDK1
GO:0051445	regulation_of_meiotic_cell_cycle	Biological Process	2	49	46	17492	0.0073552	0.0248127	2.13341	15.5209	0.0434783	CDC20//TTK
GO:0031109	microtubule_polymerization_or_depolymerization	Biological Process	2	50	46	17492	0.00764892	0.0255212	2.1164	15.2104	0.0434783	KIF18A//KIF2C
GO:0032206	positive_regulation_of_telomere_maintenance	Biological Process	2	50	46	17492	0.00764892	0.0255212	2.1164	15.2104	0.0434783	AURKB//NEK2
GO:0006333	chromatin_assembly_or_disassembly	Biological Process	3	155	46	17492	0.00783932	0.0255212	2.10572	7.35989	0.0652174	CENPA//CENPM//CENPN
GO:0048146	positive_regulation_of_fibroblast_proliferation	Biological Process	2	51	46	17492	0.00794787	0.0255794	2.09975	14.9122	0.0434783	CCNA2//CCNB1
GO:0051972	regulation_of_telomerase_activity	Biological Process	2	51	46	17492	0.00794787	0.0255794	2.09975	14.9122	0.0434783	AURKB//NEK2
GO:0034728	nucleosome_organization	Biological Process	3	157	46	17492	0.0081191	0.0260307	2.09049	7.26613	0.0652174	CENPA//CENPM//CENPN
GO:0006338	chromatin_remodeling	Biological Process	3	159	46	17492	0.00840472	0.026844	2.07548	7.17473	0.0652174	CENPA//CENPM//CENPN
GO:0032210	regulation_of_telomere_maintenance_via_telomerase	Biological Process	2	54	46	17492	0.00887589	0.0282415	2.05179	14.0837	0.0434783	AURKB//NEK2
GO:0008284	positive_regulation_of_cell_population_proliferation	Biological Process	7	906	46	17492	0.00893624	0.0283262	2.04885	2.938	0.152174	BIRC5//CCNA2//CCNB1//CDC20//CDK1//PRC1//TTK
GO:1902806	regulation_of_cell_cycle_G1|S_phase_transition	Biological Process	3	165	46	17492	0.00929691	0.0293587	2.03166	6.91383	0.0652174	AURKA//CCNB1//CDK1
GO:0055013	cardiac_muscle_cell_development	Biological Process	2	57	46	17492	0.00985004	0.0309889	2.00656	13.3425	0.0434783	CCNB1//CDK1
GO:0051100	negative_regulation_of_binding	Biological Process	3	169	46	17492	0.00992141	0.031097	2.00343	6.75019	0.0652174	AURKA//AURKB//NEK2
GO:0045143	homologous_chromosome_segregation	Biological Process	2	58	46	17492	0.0101849	0.0318041	1.99204	13.1124	0.0434783	ESPL1//PTTG1
GO:0051246	regulation_of_protein_metabolic_process	Biological Process	14	2808	46	17492	0.0108333	0.0328519	1.96524	1.89589	0.304348	AURKA//BIRC5//CCNA2//CCNB1//CCNB2//CDC20//CDK1//CENPE//MAD2L1//PBK//PTTG1//TPX2//TTK//UBE2C
GO:0043085	positive_regulation_of_catalytic_activity	Biological Process	9	1431	46	17492	0.0111051	0.033555	1.95448	2.39158	0.195652	AURKB//CCNB1//CDC20//CDK1//CENPE//NEK2//RCC2//TPX2//UBE2C
GO:1904356	regulation_of_telomere_maintenance_via_telomere_lengthening	Biological Process	2	61	46	17492	0.0112194	0.0337787	1.95003	12.4676	0.0434783	AURKB//NEK2
GO:1901796	regulation_of_signal_transduction_by_p53_class_mediator	Biological Process	3	180	46	17492	0.0117629	0.0352888	1.92948	6.33768	0.0652174	AURKA//AURKB//TPX2
GO:0065003	protein-containing_complex_assembly	Biological Process	9	1449	46	17492	0.0119964	0.035861	1.92095	2.36187	0.195652	CCNB1//CDK1//CENPA//CENPE//CENPF//CENPM//CENPN//RRM2//UBE2C
GO:0060420	regulation_of_heart_growth	Biological Process	2	64	46	17492	0.0122982	0.0366331	1.91016	11.8832	0.0434783	CCNB1//CDK1
GO:0043170	macromolecule_metabolic_process	Biological Process	24	6145	46	17492	0.0129918	0.038022	1.88633	1.48515	0.521739	AURKA//AURKB//BIRC5//BUB1//BUB1B//CCNA2//CCNB1//CCNB2//CDC20//CDCA3//CDCA5//CDK1//CENPF//DLGAP5//ESPL1//MAD2L1//MELK//NEK2//PBK//PTTG1//RAD21//RRM2//TTK//UBE2C
GO:0070192	chromosome_organization_involved_in_meiotic_cell_cycle	Biological Process	2	67	46	17492	0.0134208	0.0387404	1.87222	11.3511	0.0434783	BUB1//BUB1B
GO:2000573	positive_regulation_of_DNA_biosynthetic_process	Biological Process	2	67	46	17492	0.0134208	0.0387404	1.87222	11.3511	0.0434783	AURKB//NEK2
GO:0045844	positive_regulation_of_striated_muscle_tissue_development	Biological Process	2	68	46	17492	0.0138045	0.0397117	1.85998	11.1841	0.0434783	CCNB1//CDK1
GO:1901863	positive_regulation_of_muscle_tissue_development	Biological Process	2	69	46	17492	0.014193	0.04069	1.84792	11.0221	0.0434783	CCNB1//CDK1
GO:0006974	cellular_response_to_DNA_damage_stimulus	Biological Process	6	769	46	17492	0.0148205	0.0423443	1.82914	2.96692	0.130435	AURKA//CCNB1//CDCA5//CDK1//PTTG1//RAD21
GO:0031396	regulation_of_protein_ubiquitination	Biological Process	3	200	46	17492	0.0155862	0.043897	1.80726	5.70391	0.0652174	CDC20//MAD2L1//UBE2C
GO:0018107	peptidyl-threonine_phosphorylation	Biological Process	2	73	46	17492	0.015794	0.0440762	1.80151	10.4181	0.0434783	CDK1//TTK
GO:0045859	regulation_of_protein_kinase_activity	Biological Process	6	784	46	17492	0.0161653	0.044963	1.79142	2.91016	0.130435	CCNA2//CCNB1//CCNB2//CDK1//CENPE//TPX2
GO:0034622	cellular_protein-containing_complex_assembly	Biological Process	6	789	46	17492	0.0166319	0.0461082	1.77906	2.89172	0.130435	CENPA//CENPE//CENPF//CENPM//CENPN//UBE2C
GO:0055024	regulation_of_cardiac_muscle_tissue_development	Biological Process	2	79	46	17492	0.0183332	0.0499997	1.73676	9.62686	0.0434783	CCNB1//CDK1
GO:0032204	regulation_of_telomere_maintenance	Biological Process	2	81	46	17492	0.0192156	0.052068	1.71635	9.38916	0.0434783	AURKB//NEK2
GO:0034644	cellular_response_to_UV	Biological Process	2	81	46	17492	0.0192156	0.052068	1.71635	9.38916	0.0434783	AURKB//PBK
GO:0048145	regulation_of_fibroblast_proliferation	Biological Process	2	82	46	17492	0.0196634	0.0531101	1.70634	9.27466	0.0434783	CCNA2//CCNB1
GO:0019953	sexual_reproduction	Biological Process	6	820	46	17492	0.0197365	0.0531368	1.70473	2.7824	0.130435	AURKA//CCNB1//CDK1//KIF18A//PTTG1//TTK
GO:0055007	cardiac_muscle_cell_differentiation	Biological Process	2	84	46	17492	0.0205721	0.0550747	1.68672	9.05383	0.0434783	CCNB1//CDK1
GO:0051781	positive_regulation_of_cell_division	Biological Process	2	86	46	17492	0.0214982	0.0566096	1.6676	8.84328	0.0434783	AURKB//KIF23
GO:0061024	membrane_organization	Biological Process	6	844	46	17492	0.0223992	0.058798	1.64977	2.70328	0.130435	AURKB//CCNB1//CCNB2//CDK1//CEP55//KIF20A
GO:0034599	cellular_response_to_oxidative_stress	Biological Process	3	235	46	17492	0.0237843	0.0614732	1.62371	4.85439	0.0652174	CCNA2//CDK1//MELK
GO:0043549	regulation_of_kinase_activity	Biological Process	6	862	46	17492	0.0245506	0.0632592	1.60994	2.64683	0.130435	CCNA2//CCNB1//CCNB2//CDK1//CENPE//TPX2
GO:0001578	microtubule_bundle_formation	Biological Process	2	93	46	17492	0.024873	0.0636991	1.60427	8.17765	0.0434783	KIF20A//PRC1
GO:0046620	regulation_of_organ_growth	Biological Process	2	93	46	17492	0.024873	0.0636991	1.60427	8.17765	0.0434783	CCNB1//CDK1
GO:0097711	ciliary_basal_body-plasma_membrane_docking	Biological Process	2	95	46	17492	0.0258746	0.06597	1.58713	8.00549	0.0434783	CDK1//NEK2
GO:0018193	peptidyl-amino_acid_modification	Biological Process	6	876	46	17492	0.0263178	0.0665872	1.57975	2.60453	0.130435	AURKA//AURKB//CCNB1//CDK1//MELK//TTK
GO:0032091	negative_regulation_of_protein_binding	Biological Process	2	103	46	17492	0.0300417	0.0751043	1.52228	7.38371	0.0434783	AURKA//AURKB
GO:0001932	regulation_of_protein_phosphorylation	Biological Process	8	1433	46	17492	0.0316838	0.0785086	1.49916	2.12288	0.173913	CCNA2//CCNB1//CCNB2//CDK1//CENPE//PBK//TPX2//TTK
GO:0006275	regulation_of_DNA_replication	Biological Process	2	107	46	17492	0.0322191	0.0796	1.49189	7.10768	0.0434783	CCNA2//CDK1
GO:0007276	gamete_generation	Biological Process	5	684	46	17492	0.032969	0.081214	1.48189	2.77968	0.108696	AURKA//CCNB1//KIF18A//PTTG1//TTK
GO:0071482	cellular_response_to_light_stimulus	Biological Process	2	111	46	17492	0.0344569	0.0838952	1.46272	6.85155	0.0434783	AURKB//PBK
GO:2000278	regulation_of_DNA_biosynthetic_process	Biological Process	2	112	46	17492	0.0350257	0.0850335	1.45561	6.79037	0.0434783	AURKB//NEK2
GO:0035051	cardiocyte_differentiation	Biological Process	2	113	46	17492	0.0355981	0.0861742	1.44857	6.73028	0.0434783	CCNB1//CDK1
GO:0016579	protein_deubiquitination	Biological Process	3	277	46	17492	0.0361781	0.0871465	1.44155	4.11835	0.0652174	CCNA2//CDC20//CDK1
GO:0031398	positive_regulation_of_protein_ubiquitination	Biological Process	2	116	46	17492	0.0373372	0.0896093	1.42786	6.55622	0.0434783	CDC20//UBE2C
GO:0031401	positive_regulation_of_protein_modification_process	Biological Process	7	1220	46	17492	0.0388236	0.0929111	1.4109	2.18182	0.152174	CCNB1//CDC20//CDK1//CENPE//TPX2//TTK//UBE2C
GO:0044843	cell_cycle_G1|S_phase_transition	Biological Process	2	120	46	17492	0.0397061	0.0944847	1.40114	6.33768	0.0434783	CCNA2//RRM2
GO:1903578	regulation_of_ATP_metabolic_process	Biological Process	2	120	46	17492	0.0397061	0.0944847	1.40114	6.33768	0.0434783	CCNB1//CDK1
GO:0070646	protein_modification_by_small_protein_removal	Biological Process	3	294	46	17492	0.0419792	0.0982243	1.37697	3.88021	0.0652174	CCNA2//CDC20//CDK1
GO:0051101	regulation_of_DNA_binding	Biological Process	2	126	46	17492	0.0433638	0.101094	1.36287	6.03589	0.0434783	CDCA5//NEK2
GO:0006281	DNA_repair	Biological Process	4	506	46	17492	0.0434466	0.101094	1.36204	3.00601	0.0869565	CDCA5//CDK1//PTTG1//RAD21
GO:0032434	regulation_of_proteasomal_ubiquitin-dependent_protein_catabolic_process	Biological Process	2	127	46	17492	0.0439853	0.101784	1.35669	5.98836	0.0434783	AURKA//PBK
GO:0071900	regulation_of_protein_serine|threonine_kinase_activity	Biological Process	4	510	46	17492	0.0445052	0.102704	1.35159	2.98244	0.0869565	CCNA2//CCNB1//CCNB2//CDK1
GO:0006259	DNA_metabolic_process	Biological Process	5	745	46	17492	0.0449827	0.103522	1.34695	2.55209	0.108696	CDCA5//CDK1//CENPF//PTTG1//RAD21
GO:0034614	cellular_response_to_reactive_oxygen_species	Biological Process	2	130	46	17492	0.0458698	0.104301	1.33847	5.85017	0.0434783	CCNA2//CDK1
GO:0055002	striated_muscle_cell_development	Biological Process	2	131	46	17492	0.0465046	0.104449	1.3325	5.80551	0.0434783	CCNB1//CDK1
GO:0042177	negative_regulation_of_protein_catabolic_process	Biological Process	2	132	46	17492	0.0471427	0.1056	1.32659	5.76153	0.0434783	MAD2L1//PBK
GO:0032355	response_to_estradiol	Biological Process	2	136	46	17492	0.049727	0.110213	1.30341	5.59207	0.0434783	CCNA2//KIF18A

## Sheet: CC_result
ID	Term	Ontology	Count	Size	numInt	numTotal	p_value	fdr	Enrichment_Score	Fold_Enrichment	GeneRatio	Genes
GO:0000775	chromosome,_centromeric_region	Cellular Component	26	195	46	18337	4.12767e-40	6.0264e-38	39.3843	53.1507	0.565217	AURKA//AURKB//BIRC5//BUB1//BUB1B//CCNB1//CDCA5//CDCA8//CENPA//CENPE//CENPF//CENPM//CENPN//KIF18A//KIF2C//MAD1L1//MAD2L1//NCAPG//NDC80//NEK2//RAD21//RCC2//SPAG5//SPC25//TTK//ZWINT
GO:0005819	spindle	Cellular Component	26	356	46	18337	4.8898e-33	3.56955e-31	32.3107	29.1135	0.565217	AURKA//AURKB//BIRC5//BUB1B//CCNB1//CDC20//CDCA8//CDK1//CENPE//CENPF//DLGAP5//ESPL1//KIF11//KIF15//KIF18A//KIF20A//KIF23//MAD1L1//MAD2L1//NEK2//PRC1//RAD21//RCC2//SPAG5//TPX2//TTK
GO:0000779	condensed_chromosome,_centromeric_region	Cellular Component	20	119	46	18337	1.60202e-32	7.7965e-31	31.7953	66.9967	0.434783	AURKA//AURKB//BIRC5//BUB1//BUB1B//CCNB1//CENPA//CENPE//CENPF//CENPM//CENPN//KIF2C//MAD1L1//MAD2L1//NCAPG//NDC80//NEK2//SPAG5//SPC25//ZWINT
GO:0000793	condensed_chromosome	Cellular Component	23	227	46	18337	2.78936e-32	1.01812e-30	31.5545	40.3899	0.5	AURKA//AURKB//BIRC5//BUB1//BUB1B//CCNB1//CDCA5//CENPA//CENPE//CENPF//CENPM//CENPN//KIF2C//MAD1L1//MAD2L1//MKI67//NCAPG//NDC80//NEK2//RAD21//SPAG5//SPC25//ZWINT
GO:0000776	kinetochore	Cellular Component	20	137	46	18337	3.3047e-31	9.64974e-30	30.4809	58.1942	0.434783	AURKB//BIRC5//BUB1//BUB1B//CCNB1//CENPA//CENPE//CENPF//CENPM//CENPN//KIF18A//KIF2C//MAD1L1//MAD2L1//NDC80//NEK2//SPAG5//SPC25//TTK//ZWINT
GO:0000777	condensed_chromosome_kinetochore	Cellular Component	17	106	46	18337	3.5748e-27	8.69868e-26	26.4467	63.9313	0.369565	BIRC5//BUB1//BUB1B//CCNB1//CENPA//CENPE//CENPF//CENPM//CENPN//KIF2C//MAD1L1//MAD2L1//NDC80//NEK2//SPAG5//SPC25//ZWINT
GO:0015630	microtubule_cytoskeleton	Cellular Component	30	1232	46	18337	1.63827e-24	3.41697e-23	23.7856	9.70691	0.652174	AURKA//AURKB//BIRC5//BUB1B//CCNB1//CCNB2//CDC20//CDCA8//CDK1//CENPE//CENPF//CEP55//DLGAP5//ESPL1//KIF11//KIF15//KIF18A//KIF20A//KIF23//KIF2C//MAD1L1//MAD2L1//NDC80//NEK2//PRC1//RAD21//RCC2//SPAG5//TPX2//TTK
GO:0072686	mitotic_spindle	Cellular Component	13	122	46	18337	2.19679e-18	3.95156e-17	17.6582	42.477	0.282609	AURKA//AURKB//CDK1//CENPE//ESPL1//KIF11//KIF18A//KIF23//MAD1L1//MAD2L1//RCC2//SPAG5//TPX2
GO:0000922	spindle_pole	Cellular Component	14	165	46	18337	2.43589e-18	3.95156e-17	17.6133	33.8232	0.304348	AURKA//AURKB//CCNB1//CDC20//CENPF//DLGAP5//KIF11//MAD1L1//MAD2L1//NEK2//PRC1//RAD21//SPAG5//TPX2
GO:0005694	chromosome	Cellular Component	28	1717	46	18337	6.8309e-18	9.97312e-17	17.1655	6.50067	0.608696	AURKA//AURKB//BIRC5//BUB1//BUB1B//CCNB1//CDCA5//CDCA8//CDK1//CENPA//CENPE//CENPF//CENPM//CENPN//KIF18A//KIF2C//MAD1L1//MAD2L1//MKI67//NCAPG//NDC80//NEK2//RAD21//RCC2//SPAG5//SPC25//TTK//ZWINT
GO:0030496	midbody	Cellular Component	14	182	46	18337	9.87102e-18	1.31015e-16	17.0056	30.6639	0.304348	AURKA//AURKB//BIRC5//CDCA8//CDK1//CENPE//CENPF//CEP55//KIF20A//KIF23//NEK2//PRC1//RCC2//SPAG5
GO:0005856	cytoskeleton	Cellular Component	30	2239	46	18337	4.58577e-17	5.57936e-16	16.3386	5.34118	0.652174	AURKA//AURKB//BIRC5//BUB1B//CCNB1//CCNB2//CDC20//CDCA8//CDK1//CENPE//CENPF//CEP55//DLGAP5//ESPL1//KIF11//KIF15//KIF18A//KIF20A//KIF23//KIF2C//MAD1L1//MAD2L1//NDC80//NEK2//PRC1//RAD21//RCC2//SPAG5//TPX2//TTK
GO:0005829	cytosol	Cellular Component	39	5142	46	18337	1.52635e-15	1.71421e-14	14.8163	3.02345	0.847826	AURKA//AURKB//BIRC5//BUB1//BUB1B//CCNA2//CCNB1//CCNB2//CDC20//CDCA3//CDCA5//CDCA8//CDK1//CENPA//CENPE//CENPF//CENPM//CENPN//DLGAP5//ESPL1//KIF11//KIF15//KIF18A//KIF23//KIF2C//MAD1L1//MAD2L1//NCAPG//NDC80//NEK2//PRC1//PTTG1//RAD21//RCC2//RRM2//SPC25//TPX2/
GO:0005874	microtubule	Cellular Component	16	424	46	18337	2.65102e-15	2.76463e-14	14.5766	15.0427	0.347826	AURKA//AURKB//BIRC5//CDK1//CENPE//KIF11//KIF15//KIF18A//KIF20A//KIF23//KIF2C//NEK2//PRC1//RCC2//SPAG5//TPX2
GO:0005815	microtubule_organizing_center	Cellular Component	19	767	46	18337	7.39933e-15	7.20201e-14	14.1308	9.87481	0.413043	AURKA//AURKB//BUB1B//CCNB1//CCNB2//CDC20//CDK1//CENPF//CEP55//DLGAP5//ESPL1//KIF15//KIF18A//KIF23//KIF2C//MAD1L1//NDC80//NEK2//SPAG5
GO:0005813	centrosome	Cellular Component	17	581	46	18337	1.9345e-14	1.76523e-13	13.7134	11.6639	0.369565	AURKA//AURKB//CCNB1//CCNB2//CDC20//CDK1//CENPF//CEP55//DLGAP5//ESPL1//KIF15//KIF23//KIF2C//MAD1L1//NDC80//NEK2//SPAG5
GO:0005876	spindle_microtubule	Cellular Component	9	61	46	18337	2.69602e-14	2.3154e-13	13.5693	58.8143	0.195652	AURKA//AURKB//BIRC5//CDK1//CENPE//KIF11//KIF18A//PRC1//SPAG5
GO:0005875	microtubule_associated_complex	Cellular Component	11	152	46	18337	9.15531e-14	7.42597e-13	13.0383	28.8483	0.23913	AURKA//AURKB//BIRC5//CDCA8//CENPE//KIF11//KIF15//KIF18A//KIF20A//KIF23//KIF2C
GO:0000780	condensed_nuclear_chromosome,_centromeric_region	Cellular Component	7	27	46	18337	3.31454e-13	2.54696e-12	12.4796	103.349	0.152174	AURKA//AURKB//BUB1//BUB1B//CCNB1//CENPA//NDC80
GO:0000794	condensed_nuclear_chromosome	Cellular Component	9	101	46	18337	3.01832e-12	2.20337e-11	11.5202	35.5215	0.195652	AURKA//AURKB//BUB1//BUB1B//CCNB1//CENPA//NDC80//NEK2//RAD21
GO:0005634	nucleus	Cellular Component	41	7488	46	18337	1.15508e-11	8.03055e-11	10.9374	2.18267	0.891304	AURKA//AURKB//BIRC5//BUB1//BUB1B//CCNA2//CCNB1//CCNB2//CDC20//CDCA5//CDCA8//CDK1//CENPA//CENPE//CENPF//CENPM//CENPN//DLGAP5//ESPL1//KIF11//KIF18A//KIF20A//KIF23//KIF2C//MAD1L1//MAD2L1//MELK//MKI67//NCAPG//NDC80//NEK2//PBK//PRC1//PTTG1//RAD21//RCC2//SPC25/
GO:0005871	kinesin_complex	Cellular Component	7	55	46	18337	7.18891e-11	4.77082e-10	10.1433	50.7348	0.152174	CENPE//KIF11//KIF15//KIF18A//KIF20A//KIF23//KIF2C
GO:0000940	condensed_chromosome_outer_kinetochore	Cellular Component	5	14	46	18337	1.56282e-10	9.92051e-10	9.80609	142.368	0.108696	BUB1//BUB1B//CCNB1//CENPF//NDC80
GO:0032133	chromosome_passenger_complex	Cellular Component	4	5	46	18337	1.72939e-10	1.05205e-09	9.76211	318.904	0.0869565	AURKA//AURKB//BIRC5//CDCA8
GO:0051233	spindle_midzone	Cellular Component	6	34	46	18337	2.26586e-10	1.32326e-09	9.64477	70.3465	0.130435	AURKA//AURKB//CDCA8//CENPE//KIF18A//RCC2
GO:0000778	condensed_nuclear_chromosome_kinetochore	Cellular Component	5	16	46	18337	3.39709e-10	1.9076e-09	9.46889	124.572	0.108696	BUB1//BUB1B//CCNB1//CENPA//NDC80
GO:0045171	intercellular_bridge	Cellular Component	6	71	46	18337	2.25138e-08	1.21741e-07	7.64755	33.6871	0.130435	CDCA8//CEP55//KIF20A//KIF23//PRC1//TPX2
GO:1990023	mitotic_spindle_midzone	Cellular Component	4	13	46	18337	2.43701e-08	1.27073e-07	7.61314	122.656	0.0869565	AURKB//CENPE//KIF18A//RCC2
GO:0000942	condensed_nuclear_chromosome_outer_kinetochore	Cellular Component	3	4	46	18337	5.89936e-08	2.97002e-07	7.2292	298.973	0.0652174	BUB1//CCNB1//NDC80
GO:0005654	nucleoplasm	Cellular Component	26	3948	46	18337	2.40438e-07	1.17013e-06	6.619	2.62523	0.565217	AURKA//AURKB//BIRC5//BUB1//CCNA2//CCNB1//CDC20//CDCA5//CDCA8//CDK1//CENPA//CENPE//CENPF//CENPM//CENPN//KIF20A//KIF23//MAD2L1//MKI67//NDC80//NEK2//PRC1//RAD21//TPX2//UBE2C//ZWINT
GO:0005737	cytoplasm	Cellular Component	44	11647	46	18337	3.08095e-07	1.45103e-06	6.51131	1.50594	0.956522	AURKA//AURKB//BIRC5//BUB1//BUB1B//CCNA2//CCNB1//CCNB2//CDC20//CDCA3//CDCA5//CDCA8//CDK1//CENPA//CENPE//CENPF//CENPM//CENPN//CEP55//DLGAP5//ESPL1//KIF11//KIF15//KIF18A//KIF20A//KIF23//KIF2C//MAD1L1//MAD2L1//MELK//NCAPG//NDC80//NEK2//PRC1//PTTG1//RAD21//RCC
GO:0031981	nuclear_lumen	Cellular Component	28	4719	46	18337	5.07723e-07	2.31649e-06	6.29437	2.36526	0.608696	AURKA//AURKB//BIRC5//BUB1//BUB1B//CCNA2//CCNB1//CDC20//CDCA5//CDCA8//CDK1//CENPA//CENPE//CENPF//CENPM//CENPN//KIF20A//KIF23//MAD2L1//MKI67//NDC80//NEK2//PRC1//RAD21//RCC2//TPX2//UBE2C//ZWINT
GO:0000307	cyclin-dependent_protein_kinase_holoenzyme_complex	Cellular Component	4	42	46	18337	3.61752e-06	1.60048e-05	5.44159	37.9648	0.0869565	CCNA2//CCNB1//CCNB2//CDK1
GO:0097125	cyclin_B1-CDK1_complex	Cellular Component	2	2	46	18337	6.15655e-06	2.6437e-05	5.21066	398.63	0.0434783	CCNB1//CDK1
GO:0031616	spindle_pole_centrosome	Cellular Component	3	15	46	18337	6.58187e-06	2.74558e-05	5.18165	79.7261	0.0652174	AURKA//AURKB//DLGAP5
GO:0045120	pronucleus	Cellular Component	3	16	46	18337	8.08652e-06	3.27953e-05	5.09224	74.7432	0.0652174	AURKA//CCNA2//CENPF
GO:0043229	intracellular_organelle	Cellular Component	44	12873	46	18337	1.73971e-05	6.86482e-05	4.75952	1.36252	0.956522	AURKA//AURKB//BIRC5//BUB1//BUB1B//CCNA2//CCNB1//CCNB2//CDC20//CDCA5//CDCA8//CDK1//CENPA//CENPE//CENPF//CENPM//CENPN//CEP55//DLGAP5//ESPL1//KIF11//KIF15//KIF18A//KIF20A//KIF23//KIF2C//MAD1L1//MAD2L1//MELK//MKI67//NCAPG//NDC80//NEK2//PBK//PRC1//PTTG1//RAD21
GO:0043231	intracellular_membrane-bounded_organelle	Cellular Component	41	11099	46	18337	1.79244e-05	6.88676e-05	4.74655	1.47255	0.891304	AURKA//AURKB//BIRC5//BUB1//BUB1B//CCNA2//CCNB1//CCNB2//CDC20//CDCA5//CDCA8//CDK1//CENPA//CENPE//CENPF//CENPM//CENPN//DLGAP5//ESPL1//KIF11//KIF18A//KIF20A//KIF23//KIF2C//MAD1L1//MAD2L1//MELK//MKI67//NCAPG//NDC80//NEK2//PBK//PRC1//PTTG1//RAD21//RCC2//SPC25/
GO:0005680	anaphase-promoting_complex	Cellular Component	3	21	46	18337	1.90374e-05	7.1268e-05	4.72039	56.9472	0.0652174	BUB1B//CDC20//UBE2C
GO:0031262	Ndc80_complex	Cellular Component	2	4	46	18337	3.68212e-05	0.000134397	4.4339	199.315	0.0434783	NDC80//SPC25
GO:0097431	mitotic_spindle_pole	Cellular Component	3	27	46	18337	4.14286e-05	0.000147526	4.3827	44.2923	0.0652174	AURKA//MAD1L1//SPAG5
GO:0000228	nuclear_chromosome	Cellular Component	12	1260	46	18337	4.5807e-05	0.000159234	4.33907	3.79648	0.26087	AURKA//AURKB//BIRC5//BUB1//BUB1B//CCNB1//CDCA5//CDK1//CENPA//NDC80//NEK2//RAD21
GO:1902554	serine|threonine_protein_kinase_complex	Cellular Component	4	86	46	18337	6.332e-05	0.000214994	4.19846	18.541	0.0869565	CCNA2//CCNB1//CCNB2//CDK1
GO:1902911	protein_kinase_complex	Cellular Component	4	102	46	18337	0.000123059	0.000408332	3.90989	15.6326	0.0869565	CCNA2//CCNB1//CCNB2//CDK1
GO:0005828	kinetochore_microtubule	Cellular Component	2	7	46	18337	0.000128257	0.000416123	3.89192	113.894	0.0434783	CENPE//KIF18A
GO:0043203	axon_hillock	Cellular Component	2	8	46	18337	0.000170736	0.000541901	3.76768	99.6576	0.0434783	AURKA//TPX2
GO:0000152	nuclear_ubiquitin_ligase_complex	Cellular Component	3	44	46	18337	0.000182065	0.000565563	3.73977	27.1793	0.0652174	BUB1B//CDC20//UBE2C
GO:0044615	nuclear_pore_nuclear_basket	Cellular Component	2	12	46	18337	0.000399883	0.00121631	3.39807	66.4384	0.0434783	MAD1L1//MAD2L1
GO:0010369	chromocenter	Cellular Component	2	14	46	18337	0.000549594	0.00163757	3.25996	56.9472	0.0434783	AURKB//CDCA8
GO:0008278	cohesin_complex	Cellular Component	2	16	46	18337	0.000722427	0.00210949	3.14121	49.8288	0.0434783	CDCA5//RAD21
GO:0043227	membrane-bounded_organelle	Cellular Component	41	12575	46	18337	0.00105345	0.00301575	2.97739	1.29971	0.891304	AURKA//AURKB//BIRC5//BUB1//BUB1B//CCNA2//CCNB1//CCNB2//CDC20//CDCA5//CDCA8//CDK1//CENPA//CENPE//CENPF//CENPM//CENPN//DLGAP5//ESPL1//KIF11//KIF18A//KIF20A//KIF23//KIF2C//MAD1L1//MAD2L1//MELK//MKI67//NCAPG//NDC80//NEK2//PBK//PRC1//PTTG1//RAD21//RCC2//SPC25/
GO:0035371	microtubule_plus-end	Cellular Component	2	22	46	18337	0.00137741	0.00386734	2.86094	36.2391	0.0434783	KIF2C//SPAG5
GO:0034451	centriolar_satellite	Cellular Component	3	96	46	18337	0.00179317	0.00493967	2.74638	12.4572	0.0652174	CEP55//DLGAP5//SPAG5
GO:0090543	Flemming_body	Cellular Component	2	32	46	18337	0.00291076	0.00772675	2.53599	24.9144	0.0434783	CEP55//KIF23
GO:1990752	microtubule_end	Cellular Component	2	33	46	18337	0.00309362	0.00806551	2.50953	24.1594	0.0434783	KIF2C//SPAG5
GO:1990234	transferase_complex	Cellular Component	7	798	46	18337	0.00350231	0.00897082	2.45565	3.49676	0.152174	BUB1B//CCNA2//CCNB1//CCNB2//CDC20//CDK1//UBE2C
GO:0031461	cullin-RING_ubiquitin_ligase_complex	Cellular Component	3	162	46	18337	0.0077802	0.0180303	2.10901	7.38205	0.0652174	BUB1B//CDC20//UBE2C
GO:0032154	cleavage_furrow	Cellular Component	2	56	46	18337	0.00869899	0.0198446	2.06053	14.2368	0.0434783	CEP55//KIF20A
GO:0005881	cytoplasmic_microtubule	Cellular Component	2	70	46	18337	0.0133422	0.029074	1.87477	11.3894	0.0434783	KIF18A//KIF2C
GO:0032153	cell_division_site	Cellular Component	2	72	46	18337	0.0140765	0.0302231	1.85151	11.0731	0.0434783	CEP55//KIF20A
GO:1902494	catalytic_complex	Cellular Component	8	1386	46	18337	0.0206987	0.0413973	1.68406	2.3009	0.173913	BUB1B//CCNA2//CCNB1//CCNB2//CDC20//CDK1//RRM2//UBE2C
GO:0005643	nuclear_pore	Cellular Component	2	92	46	18337	0.022336	0.042391	1.65099	8.66588	0.0434783	MAD1L1//MAD2L1
GO:0016363	nuclear_matrix	Cellular Component	2	108	46	18337	0.0300633	0.0541882	1.52196	7.38205	0.0434783	CENPF//RAD21
GO:0048471	perinuclear_region_of_cytoplasm	Cellular Component	5	715	46	18337	0.0326324	0.0581016	1.48635	2.78763	0.108696	AURKA//BUB1B//CDC20//CENPF//MAD2L1
GO:0000151	ubiquitin_ligase_complex	Cellular Component	3	287	46	18337	0.0351377	0.0618085	1.45423	4.16687	0.0652174	BUB1B//CDC20//UBE2C
GO:0034399	nuclear_periphery	Cellular Component	2	130	46	18337	0.0421463	0.0723924	1.37524	6.13278	0.0434783	CENPF//RAD21

## Sheet: MF_result
ID	Term	Ontology	Count	Size	numInt	numTotal	p_value	fdr	Enrichment_Score	Fold_Enrichment	GeneRatio	Genes
GO:0008017	microtubule_binding	Molecular Function	11	254	37	15624	9.94068e-12	1.15312e-09	11.0026	18.2873	0.297297	BIRC5//CENPE//KIF11//KIF15//KIF18A//KIF20A//KIF23//KIF2C//PRC1//RCC2//SPAG5
GO:0015631	tubulin_binding	Molecular Function	11	346	37	15624	2.74035e-10	1.58941e-08	9.56219	13.4248	0.297297	BIRC5//CENPE//KIF11//KIF15//KIF18A//KIF20A//KIF23//KIF2C//PRC1//RCC2//SPAG5
GO:0003777	microtubule_motor_activity	Molecular Function	7	84	37	15624	9.09561e-10	3.05365e-08	9.04117	35.1892	0.189189	CENPE//KIF11//KIF15//KIF18A//KIF20A//KIF23//KIF2C
GO:0005524	ATP_binding	Molecular Function	18	1481	37	15624	1.05298e-09	3.05365e-08	8.97758	5.13225	0.486486	AURKA//AURKB//BUB1//BUB1B//CDK1//CENPE//KIF11//KIF15//KIF18A//KIF20A//KIF23//KIF2C//MELK//MKI67//NEK2//PBK//TTK//UBE2C
GO:0030554	adenyl_nucleotide_binding	Molecular Function	18	1551	37	15624	2.22392e-09	5.15948e-08	8.65288	4.90062	0.486486	AURKA//AURKB//BUB1//BUB1B//CDK1//CENPE//KIF11//KIF15//KIF18A//KIF20A//KIF23//KIF2C//MELK//MKI67//NEK2//PBK//TTK//UBE2C
GO:0004672	protein_kinase_activity	Molecular Function	12	612	37	15624	8.84305e-09	1.70966e-07	8.0534	8.27981	0.324324	AURKA//AURKB//BUB1//BUB1B//CCNA2//CCNB1//CCNB2//CDK1//MELK//NEK2//PBK//TTK
GO:0003774	motor_activity	Molecular Function	7	137	37	15624	2.82435e-08	4.42716e-07	7.54908	21.5759	0.189189	CENPE//KIF11//KIF15//KIF18A//KIF20A//KIF23//KIF2C
GO:0035639	purine_ribonucleoside_triphosphate_binding	Molecular Function	18	1828	37	15624	3.05321e-08	4.42716e-07	7.51524	4.15802	0.486486	AURKA//AURKB//BUB1//BUB1B//CDK1//CENPE//KIF11//KIF15//KIF18A//KIF20A//KIF23//KIF2C//MELK//MKI67//NEK2//PBK//TTK//UBE2C
GO:0032555	purine_ribonucleotide_binding	Molecular Function	18	1894	37	15624	5.3253e-08	5.98899e-07	7.27366	4.01313	0.486486	AURKA//AURKB//BUB1//BUB1B//CDK1//CENPE//KIF11//KIF15//KIF18A//KIF20A//KIF23//KIF2C//MELK//MKI67//NEK2//PBK//TTK//UBE2C
GO:0016773	phosphotransferase_activity,_alcohol_group_as_acceptor	Molecular Function	12	720	37	15624	5.35756e-08	5.98899e-07	7.27103	7.03784	0.324324	AURKA//AURKB//BUB1//BUB1B//CCNA2//CCNB1//CCNB2//CDK1//MELK//NEK2//PBK//TTK
GO:0017076	purine_nucleotide_binding	Molecular Function	18	1907	37	15624	5.92598e-08	5.98899e-07	7.22724	3.98577	0.486486	AURKA//AURKB//BUB1//BUB1B//CDK1//CENPE//KIF11//KIF15//KIF18A//KIF20A//KIF23//KIF2C//MELK//MKI67//NEK2//PBK//TTK//UBE2C
GO:0035173	histone_kinase_activity	Molecular Function	4	17	37	15624	6.1955e-08	5.98899e-07	7.20792	99.3577	0.108108	AURKA//AURKB//CCNB1//CDK1
GO:0016301	kinase_activity	Molecular Function	12	786	37	15624	1.39768e-07	1.24716e-06	6.85459	6.44687	0.324324	AURKA//AURKB//BUB1//BUB1B//CCNA2//CCNB1//CCNB2//CDK1//MELK//NEK2//PBK//TTK
GO:0000166	nucleotide_binding	Molecular Function	18	2146	37	15624	3.66826e-07	3.03942e-06	6.43554	3.54188	0.486486	AURKA//AURKB//BUB1//BUB1B//CDK1//CENPE//KIF11//KIF15//KIF18A//KIF20A//KIF23//KIF2C//MELK//MKI67//NEK2//PBK//TTK//UBE2C
GO:0004674	protein_serine|threonine_kinase_activity	Molecular Function	9	446	37	15624	7.09793e-07	5.48907e-06	6.14887	8.52115	0.243243	AURKA//AURKB//BUB1//BUB1B//CDK1//MELK//NEK2//PBK//TTK
GO:0019900	kinase_binding	Molecular Function	10	735	37	15624	5.4699e-06	3.96568e-05	5.26202	5.74517	0.27027	AURKA//AURKB//CCNA2//CCNB1//CCNB2//KIF11//KIF20A//PRC1//RCC2//TPX2
GO:0008092	cytoskeletal_protein_binding	Molecular Function	11	985	37	15624	1.10586e-05	7.5459e-05	4.9563	4.71571	0.297297	BIRC5//CENPE//KIF11//KIF15//KIF18A//KIF20A//KIF23//KIF2C//PRC1//RCC2//SPAG5
GO:0019901	protein_kinase_binding	Molecular Function	9	653	37	15624	1.60011e-05	0.000103118	4.79585	5.81996	0.243243	AURKA//CCNA2//CCNB1//CCNB2//KIF11//KIF20A//PRC1//RCC2//TPX2
GO:0016887	ATPase_activity	Molecular Function	7	445	37	15624	7.12193e-05	0.000434813	4.1474	6.64245	0.189189	CENPE//KIF11//KIF15//KIF18A//KIF20A//KIF23//KIF2C
GO:0035174	histone_serine_kinase_activity	Molecular Function	2	6	37	15624	8.1366e-05	0.000471923	4.08956	140.757	0.0540541	AURKA//AURKB
GO:0004712	protein_serine|threonine|tyrosine_kinase_activity	Molecular Function	3	44	37	15624	0.00015144	0.000836528	3.81976	28.7912	0.0810811	AURKA//AURKB//TTK
GO:0016538	cyclin-dependent_protein_serine|threonine_kinase_regulator_activity	Molecular Function	3	50	37	15624	0.000221938	0.00117022	3.65377	25.3362	0.0810811	CCNA2//CCNB1//CCNB2
GO:0019899	enzyme_binding	Molecular Function	14	2216	37	15624	0.000314052	0.00158391	3.503	2.66777	0.378378	AURKA//AURKB//BIRC5//CCNA2//CCNB1//CCNB2//CDC20//KIF11//KIF20A//NEK2//PRC1//RCC2//TPX2//UBE2C
GO:0051010	microtubule_plus-end_binding	Molecular Function	2	16	37	15624	0.000641282	0.00309953	3.19295	52.7838	0.0540541	KIF18A//KIF2C
GO:0008022	protein_C-terminus_binding	Molecular Function	4	189	37	15624	0.00100265	0.0046523	2.99885	8.93694	0.108108	CDC20//CENPF//MAD2L1//MKI67
GO:0016740	transferase_activity	Molecular Function	13	2347	37	15624	0.00197812	0.00882547	2.70375	2.33895	0.351351	AURKA//AURKB//BUB1//BUB1B//CCNA2//CCNB1//CCNB2//CDK1//MELK//NEK2//PBK//TTK//UBE2C
GO:0008574	ATP-dependent_microtubule_motor_activity,_plus-end-directed	Molecular Function	2	30	37	15624	0.00227664	0.0094318	2.64271	28.1514	0.0540541	KIF11//KIF18A
GO:0097472	cyclin-dependent_protein_kinase_activity	Molecular Function	2	30	37	15624	0.00227664	0.0094318	2.64271	28.1514	0.0540541	CCNA2//CDK1
GO:0017111	nucleoside-triphosphatase_activity	Molecular Function	7	823	37	15624	0.00282228	0.0109128	2.5494	3.59161	0.189189	CENPE//KIF11//KIF15//KIF18A//KIF20A//KIF23//KIF2C
GO:0016462	pyrophosphatase_activity	Molecular Function	7	877	37	15624	0.00401971	0.0150415	2.39581	3.37046	0.189189	CENPE//KIF11//KIF15//KIF18A//KIF20A//KIF23//KIF2C
GO:0004869	cysteine-type_endopeptidase_inhibitor_activity	Molecular Function	2	59	37	15624	0.00857712	0.0308114	2.06666	14.3142	0.0540541	BIRC5//PTTG1
GO:0019887	protein_kinase_regulator_activity	Molecular Function	3	180	37	15624	0.0087653	0.0308114	2.05723	7.03784	0.0810811	CCNA2//CCNB1//CCNB2
GO:0019207	kinase_regulator_activity	Molecular Function	3	210	37	15624	0.0132931	0.044057	1.87638	6.03243	0.0810811	CCNA2//CCNB1//CCNB2
GO:0030234	enzyme_regulator_activity	Molecular Function	6	1051	37	15624	0.0354017	0.094897	1.45098	2.41068	0.162162	BIRC5//CCNA2//CCNB1//CCNB2//CDC20//PTTG1
GO:0044389	ubiquitin-like_protein_ligase_binding	Molecular Function	3	308	37	15624	0.0359954	0.094897	1.44375	4.11302	0.0810811	AURKA//CCNB1//UBE2C
GO:0004713	protein_tyrosine_kinase_activity	Molecular Function	2	139	37	15624	0.0427311	0.105464	1.36926	6.07583	0.0540541	MELK//TTK
