# Supplementary material for: The Expression and Role Analysis of Methylation-Regulated Differentially Expressed Gene UBE2C in Pan-Cancer, Especially for HGSOC
Source: Cancers (Basel). 2022 Jun 25;14(13):3121. doi: 10.3390/cancers14133121 (PMC9264902; doi:10.3390/cancers14133121)
Supplement: Supplementary file 1 [file cancers-14-03121-s001.zip › Table S9. The DNA methylation levels of UBE2C in IOSE-80, A2780, and SKOV3 cells.xlsx]

## Sheet: methyl.matrix
chr	pos	IOSE80	SKOV3	A2780
UBE2C	1617	0.904	0.423	0.46
UBE2C	1625	0.008	0.012	0.008
UBE2C	1629	0.92	0.404	0.398
UBE2C	1641	0.951	0.471	0.492
UBE2C	1688	0.895	0.382	0.405
UBE2C	1804	0.58	0.068	0.117
UBE2C	1858	0.067	0.008	0.006
UBE2C	1883	0.115	0.008	0.008
UBE2C	1888	0.053	0.007	0.008
UBE2C	1900	0.032	0.008	0.005
UBE2C	1902	0.086	0.007	0.006
UBE2C	2166	0.009	0.004	0.006
UBE2C	2169	0.007	0.006	0.005
UBE2C	2194	0.009	0.004	0.009
UBE2C	2196	0.009	0.007	0.008
UBE2C	2200	0.009	0.004	0.005
UBE2C	2204	0.009	0.004	0.004
UBE2C	2210	0.008	0.005	0.008
UBE2C	2230	0.007	0.004	0.007
UBE2C	2239	0.006	0.005	0.008
UBE2C	2261	0.005	0.007	0.006
UBE2C	2264	0.007	0.008	0.007
UBE2C	2268	0.009	0.004	0.004
UBE2C	2286	0.008	0.008	0.005
UBE2C	2288	0.008	0.005	0.006
UBE2C	2297	0.016	0.005	0.007
UBE2C	2306	0.006	0.006	0.005
UBE2C	2309	0.01	0.005	0.005
UBE2C	2312	0.009	0.011	0.007
UBE2C	2315	0.013	0.008	0.005
UBE2C	2319	0.011	0.005	0.007
UBE2C	2335	0.007	0.008	0.008
UBE2C	2339	0.013	0.01	0.006
UBE2C	2345	0.015	0.011	0.011
UBE2C	2348	0.007	0.005	0.007
UBE2C	2352	0.006	0.009	0.008
UBE2C	2359	0.013	0.009	0.009
UBE2C	2473	0.01	0.008	0.004
UBE2C	2484	0.006	0.005	0.004
UBE2C	2511	0.011	0.004	0.007
UBE2C	2542	0.007	0.006	0.007
UBE2C	2548	0.009	0.013	0.005
UBE2C	2558	0.009	0.005	0.006
UBE2C	2577	0.01	0.009	0.007
UBE2C	2579	0.009	0.007	0.007
UBE2C	2590	0.008	0.007	0.006
UBE2C	2622	0.014	0.01	0.006

## Sheet: A2780.methl
#chr	pos	strand	type	context	ratio	methyl_C	normal_C	binom_p
UBE2C	3	-	CHH	ACCAT	NA	0	0	1
UBE2C	4	-	CHH	AACCA	NA	0	0	1
UBE2C	8	+	CHH	TTCCT	NA	0	0	1
UBE2C	9	+	CHH	TCCTC	NA	0	0	1
UBE2C	11	+	CHH	CTCTT	NA	0	0	1
UBE2C	14	+	CHH	TTCCT	NA	0	0	1
UBE2C	15	+	CHG	TCCTG	NA	0	0	1
UBE2C	17	-	CHG	ATCAG	NA	0	0	1
UBE2C	22	+	CHH	TTCCT	NA	0	0	1
UBE2C	23	+	CHG	TCCTG	NA	0	0	1
UBE2C	25	-	CHG	AACAG	NA	0	0	1
UBE2C	29	+	CHH	TTCCA	NA	0	0	1
UBE2C	30	+	CHH	TCCAT	NA	0	0	1
UBE2C	42	-	CHH	AGCAA	NA	0	0	1
UBE2C	43	+	CHG	TGCTG	NA	0	0	1
UBE2C	45	-	CHG	GCCAG	NA	0	0	1
UBE2C	46	-	CHH	AGCCA	NA	0	0	1
UBE2C	47	+	CHH	GGCTT	NA	0	0	1
UBE2C	51	+	CHH	TTCTT	NA	0	0	1
UBE2C	54	-	CHH	GGCAA	NA	0	0	1
UBE2C	55	+	CHH	TGCCA	NA	0	0	1
UBE2C	56	+	CHH	GCCAT	NA	0	0	1
UBE2C	62	-	CHH	AACAA	NA	0	0	1
UBE2C	69	+	CHH	AACCC	NA	0	0	1
UBE2C	70	+	CHH	ACCCA	NA	0	0	1
UBE2C	71	+	CHH	CCCAC	NA	0	0	1
UBE2C	73	+	CHH	CACCT	NA	0	0	1
UBE2C	74	+	CHH	ACCTT	NA	0	0	1
UBE2C	77	-	CHH	CCCAA	NA	0	0	1
UBE2C	78	-	CHH	ACCCA	NA	0	0	1
UBE2C	79	-	CHH	GACCC	NA	0	0	1
UBE2C	81	+	CHH	GTCCT	NA	0	0	1
UBE2C	82	+	CHH	TCCTT	NA	0	0	1
UBE2C	86	+	CG	TTCGT	NA	0	0	1
UBE2C	87	-	CG	TACGA	NA	0	0	1
UBE2C	92	+	CHH	TACTT	NA	0	0	1
UBE2C	95	-	CHH	ATCAA	NA	0	0	1
UBE2C	98	+	CHH	ATCTT	NA	0	0	1
UBE2C	103	+	CHH	AACCA	NA	0	0	1
UBE2C	104	+	CHH	ACCAA	NA	0	0	1
UBE2C	109	-	CHH	ACCTT	NA	0	0	1
UBE2C	110	-	CHH	CACCT	NA	0	0	1
UBE2C	112	-	CHH	TACAC	NA	0	0	1
UBE2C	115	-	CHH	TCCTA	NA	0	0	1
UBE2C	116	-	CHH	CTCCT	NA	0	0	1
UBE2C	118	-	CHH	TGCTC	NA	0	0	1
UBE2C	119	+	CHH	AGCAA	NA	0	0	1
UBE2C	123	-	CHH	ACCAT	NA	0	0	1
UBE2C	124	-	CHH	CACCA	NA	0	0	1
UBE2C	126	-	CHH	TCCAC	NA	0	0	1
UBE2C	127	-	CHH	ATCCA	NA	0	0	1
UBE2C	130	+	CHH	ATCCC	NA	0	0	1
UBE2C	131	+	CHH	TCCCT	NA	0	0	1
UBE2C	132	+	CHH	CCCTT	NA	0	0	1
UBE2C	142	+	CHH	TTCTT	NA	0	0	1
UBE2C	150	+	CHH	TTCTT	NA	0	0	1
UBE2C	167	+	CHH	TTCTT	NA	0	0	1
UBE2C	176	+	CHH	TTCAC	NA	0	0	1
UBE2C	178	+	CHH	CACCA	NA	0	0	1
UBE2C	179	+	CHH	ACCAC	NA	0	0	1
UBE2C	181	+	CHH	CACAC	NA	0	0	1
UBE2C	183	+	CHH	CACCA	NA	0	0	1
UBE2C	184	+	CHH	ACCAT	NA	0	0	1
UBE2C	188	+	CHH	TTCAA	NA	0	0	1
UBE2C	191	-	CHH	CTCTT	NA	0	0	1
UBE2C	193	-	CHH	CTCTC	NA	0	0	1
UBE2C	195	-	CHH	TTCTC	NA	0	0	1
UBE2C	200	-	CHH	CCCAT	NA	0	0	1
UBE2C	201	-	CHH	ACCCA	NA	0	0	1
UBE2C	202	-	CHH	GACCC	NA	0	0	1
UBE2C	204	+	CHH	GTCCT	NA	0	0	1
UBE2C	205	+	CHH	TCCTT	NA	0	0	1
UBE2C	216	-	CHH	CTCTT	NA	0	0	1
UBE2C	218	-	CHH	TTCTC	NA	0	0	1
UBE2C	221	-	CHH	GCCTT	NA	0	0	1
UBE2C	222	-	CHH	AGCCT	NA	0	0	1
UBE2C	223	+	CHH	GGCTA	NA	0	0	1
UBE2C	233	-	CHH	GACTT	NA	0	0	1
UBE2C	235	+	CHH	GTCAC	NA	0	0	1
UBE2C	237	+	CHH	CACCA	NA	0	0	1
UBE2C	238	+	CHG	ACCAG	NA	0	0	1
UBE2C	240	-	CHG	GACTG	NA	0	0	1
UBE2C	242	+	CHH	GTCCC	NA	0	0	1
UBE2C	243	+	CHH	TCCCT	NA	0	0	1
UBE2C	244	+	CHH	CCCTA	NA	0	0	1
UBE2C	247	+	CHH	TACTC	NA	0	0	1
UBE2C	249	+	CHH	CTCTC	NA	0	0	1
UBE2C	251	+	CHH	CTCCC	NA	0	0	1
UBE2C	252	+	CHH	TCCCA	NA	0	0	1
UBE2C	253	+	CHH	CCCAT	NA	0	0	1
UBE2C	256	+	CHH	ATCCA	NA	0	0	1
UBE2C	257	+	CHH	TCCAT	NA	0	0	1
UBE2C	260	-	CHH	TTCAT	NA	0	0	1
UBE2C	263	-	CHH	TGCTT	NA	0	0	1
UBE2C	264	+	CHH	AGCAT	NA	0	0	1
UBE2C	267	+	CHH	ATCTA	NA	0	0	1
UBE2C	270	+	CHG	TACTG	NA	0	0	1
UBE2C	272	-	CHG	TACAG	NA	0	0	1
UBE2C	275	-	CHH	TACTA	NA	0	0	1
UBE2C	281	-	CHH	ATCTT	NA	0	0	1
UBE2C	285	-	CHH	GACAA	NA	0	0	1
UBE2C	287	+	CHH	GTCTC	NA	0	0	1
UBE2C	289	+	CHH	CTCAA	NA	0	0	1
UBE2C	292	-	CHH	TCCTT	NA	0	0	1
UBE2C	293	-	CHH	TTCCT	NA	0	0	1
UBE2C	296	+	CHH	AACCA	NA	0	0	1
UBE2C	297	+	CHH	ACCAT	NA	0	0	1
UBE2C	301	+	CHH	TTCCC	NA	0	0	1
UBE2C	302	+	CHH	TCCCA	NA	0	0	1
UBE2C	303	+	CHH	CCCAT	NA	0	0	1
UBE2C	306	+	CHH	ATCCC	NA	0	0	1
UBE2C	307	+	CHH	TCCCT	NA	0	0	1
UBE2C	308	+	CHH	CCCTC	NA	0	0	1
UBE2C	310	+	CHH	CTCCC	NA	0	0	1
UBE2C	311	+	CHH	TCCCC	NA	0	0	1
UBE2C	312	+	CHH	CCCCA	NA	0	0	1
UBE2C	313	+	CHH	CCCAC	NA	0	0	1
UBE2C	315	+	CHH	CACTT	NA	0	0	1
UBE2C	319	+	CHH	TACTC	NA	0	0	1
UBE2C	321	+	CHH	CTCTT	NA	0	0	1
UBE2C	324	+	CHG	TTCCG	NA	0	0	1
UBE2C	325	+	CG	TCCGT	NA	0	0	1
UBE2C	326	-	CG	TACGG	NA	0	0	1
UBE2C	329	+	CHH	TACTA	NA	0	0	1
UBE2C	336	-	CHH	TACAA	NA	0	0	1
UBE2C	341	+	CHG	AACCG	NA	0	0	1
UBE2C	342	+	CG	ACCGC	NA	0	0	1
UBE2C	343	-	CG	TGCGG	NA	0	0	1
UBE2C	344	+	CHH	CGCAT	NA	0	0	1
UBE2C	347	+	CHH	ATCCC	NA	0	0	1
UBE2C	348	+	CHH	TCCCC	NA	0	0	1
UBE2C	349	+	CHH	CCCCC	NA	0	0	1
UBE2C	350	+	CHG	CCCCG	NA	0	0	1
UBE2C	351	+	CG	CCCGC	NA	0	0	1
UBE2C	352	-	CG	AGCGG	NA	0	0	1
UBE2C	353	+	CHH	CGCTT	NA	0	0	1
UBE2C	356	+	CHH	TTCCA	NA	0	0	1
UBE2C	357	+	CHH	TCCAC	NA	0	0	1
UBE2C	359	+	CHH	CACCT	NA	0	0	1
UBE2C	360	+	CHH	ACCTA	NA	0	0	1
UBE2C	363	-	CHH	TACTA	NA	0	0	1
UBE2C	366	-	CHH	TGCTA	NA	0	0	1
UBE2C	367	+	CHG	AGCAG	NA	0	0	1
UBE2C	369	-	CHG	GCCTG	NA	0	0	1
UBE2C	370	-	CHH	GGCCT	NA	0	0	1
UBE2C	371	+	CHH	GGCCT	NA	0	0	1
UBE2C	372	+	CHH	GCCTT	NA	0	0	1
UBE2C	376	+	CHH	TACAT	NA	0	0	1
UBE2C	383	+	CHG	AACAG	NA	0	0	1
UBE2C	385	-	CHG	ATCTG	NA	0	0	1
UBE2C	388	-	CHH	AACAT	NA	0	0	1
UBE2C	395	-	CHH	TTCAT	NA	0	0	1
UBE2C	398	-	CHH	CACTT	NA	0	0	1
UBE2C	400	-	CHH	AACAC	NA	0	0	1
UBE2C	404	+	CHG	TACTG	NA	0	0	1
UBE2C	406	-	CHG	CTCAG	NA	0	0	1
UBE2C	408	-	CHH	AACTC	NA	0	0	1
UBE2C	411	-	CHH	TCCAA	NA	0	0	1
UBE2C	412	-	CHH	CTCCA	NA	0	0	1
UBE2C	414	-	CHH	CACTC	NA	0	0	1
UBE2C	416	-	CHH	TTCAC	NA	0	0	1
UBE2C	421	-	CHH	TTCAT	NA	0	0	1
UBE2C	425	+	CHG	ATCAG	NA	0	0	1
UBE2C	427	-	CHG	GCCTG	NA	0	0	1
UBE2C	428	-	CHH	TGCCT	NA	0	0	1
UBE2C	429	+	CHH	GGCAA	NA	0	0	1
UBE2C	433	-	CHH	GTCAT	NA	0	0	1
UBE2C	435	+	CHH	GACCA	NA	0	0	1
UBE2C	436	+	CHH	ACCAC	NA	0	0	1
UBE2C	438	+	CHH	CACTC	NA	0	0	1
UBE2C	440	+	CHH	CTCTC	NA	0	0	1
UBE2C	442	+	CHH	CTCCC	NA	0	0	1
UBE2C	443	+	CHH	TCCCT	NA	0	0	1
UBE2C	444	+	CHH	CCCTT	NA	0	0	1
UBE2C	447	-	CHH	AGCAA	NA	0	0	1
UBE2C	448	+	CHH	TGCTC	NA	0	0	1
UBE2C	450	+	CHH	CTCCT	NA	0	0	1
UBE2C	451	+	CHG	TCCTG	NA	0	0	1
UBE2C	453	-	CHG	GGCAG	NA	0	0	1
UBE2C	454	+	CHH	TGCCT	NA	0	0	1
UBE2C	455	+	CHH	GCCTC	NA	0	0	1
UBE2C	457	+	CHG	CTCAG	NA	0	0	1
UBE2C	459	-	CHG	GCCTG	NA	0	0	1
UBE2C	460	-	CHH	GGCCT	NA	0	0	1
UBE2C	461	+	CHH	GGCCT	NA	0	0	1
UBE2C	462	+	CHH	GCCTA	NA	0	0	1
UBE2C	465	+	CHH	TACCT	NA	0	0	1
UBE2C	466	+	CHH	ACCTC	NA	0	0	1
UBE2C	468	+	CHH	CTCCT	NA	0	0	1
UBE2C	469	+	CHH	TCCTC	NA	0	0	1
UBE2C	471	+	CHH	CTCAT	NA	0	0	1
UBE2C	474	+	CG	ATCGA	NA	0	0	1
UBE2C	475	-	CG	CTCGA	NA	0	0	1
UBE2C	477	-	CHH	TCCTC	NA	0	0	1
UBE2C	478	-	CHH	CTCCT	NA	0	0	1
UBE2C	480	-	CHH	TCCTC	NA	0	0	1
UBE2C	481	-	CHH	GTCCT	NA	0	0	1
UBE2C	483	+	CHH	GACAT	NA	0	0	1
UBE2C	486	+	CHG	ATCCG	NA	0	0	1
UBE2C	487	+	CG	TCCGG	NA	0	0	1
UBE2C	488	-	CG	CCCGG	NA	0	0	1
UBE2C	489	-	CHG	TCCCG	NA	0	0	1
UBE2C	490	-	CHH	GTCCC	NA	0	0	1
UBE2C	492	+	CHH	GACCT	NA	0	0	1
UBE2C	493	+	CHH	ACCTT	NA	0	0	1
UBE2C	496	-	CHH	CGCAA	NA	0	0	1
UBE2C	497	+	CG	TGCGG	NA	0	0	1
UBE2C	498	-	CG	GCCGC	NA	0	0	1
UBE2C	499	-	CHG	GGCCG	NA	0	0	1
UBE2C	500	+	CHH	GGCCA	NA	0	0	1
UBE2C	501	+	CHG	GCCAG	NA	0	0	1
UBE2C	503	-	CHG	CACTG	NA	0	0	1
UBE2C	505	-	CHH	ATCAC	NA	0	0	1
UBE2C	508	-	CHH	ATCAT	NA	0	0	1
UBE2C	513	+	CHG	TACAG	NA	0	0	1
UBE2C	515	-	CHG	ACCTG	NA	0	0	1
UBE2C	516	-	CHH	TACCT	NA	0	0	1
UBE2C	522	+	CHH	AACCA	NA	0	0	1
UBE2C	523	+	CHG	ACCAG	NA	0	0	1
UBE2C	525	-	CHG	CACTG	NA	0	0	1
UBE2C	527	-	CHH	CCCAC	NA	0	0	1
UBE2C	528	-	CHH	ACCCA	NA	0	0	1
UBE2C	529	-	CHH	GACCC	NA	0	0	1
UBE2C	531	+	CHH	GTCTC	NA	0	0	1
UBE2C	533	+	CHH	CTCCT	NA	0	0	1
UBE2C	534	+	CHG	TCCTG	NA	0	0	1
UBE2C	536	-	CHG	GGCAG	NA	0	0	1
UBE2C	537	+	CHH	TGCCC	NA	0	0	1
UBE2C	538	+	CHH	GCCCC	NA	0	0	1
UBE2C	539	+	CHH	CCCCT	NA	0	0	1
UBE2C	540	+	CHH	CCCTT	NA	0	0	1
UBE2C	543	+	CHH	TTCTC	NA	0	0	1
UBE2C	545	+	CHH	CTCCT	NA	0	0	1
UBE2C	546	+	CHH	TCCTC	NA	0	0	1
UBE2C	548	+	CHH	CTCTC	NA	0	0	1
UBE2C	550	+	CHH	CTCCC	NA	0	0	1
UBE2C	551	+	CHH	TCCCT	NA	0	0	1
UBE2C	552	+	CHG	CCCTG	NA	0	0	1
UBE2C	554	-	CHG	GGCAG	NA	0	0	1
UBE2C	555	+	CHH	TGCCT	NA	0	0	1
UBE2C	556	+	CHH	GCCTC	NA	0	0	1
UBE2C	558	+	CHH	CTCCA	NA	0	0	1
UBE2C	559	+	CHH	TCCAA	NA	0	0	1
UBE2C	565	-	CHH	GGCTA	NA	0	0	1
UBE2C	566	+	CHH	AGCCC	NA	0	0	1
UBE2C	567	+	CHH	GCCCC	NA	0	0	1
UBE2C	568	+	CHH	CCCCT	NA	0	0	1
UBE2C	569	+	CHH	CCCTA	NA	0	0	1
UBE2C	572	-	CHH	TTCTA	NA	0	0	1
UBE2C	576	-	CHH	CTCAT	NA	0	0	1
UBE2C	578	-	CHH	GCCTC	NA	0	0	1
UBE2C	579	-	CHH	TGCCT	NA	0	0	1
UBE2C	580	+	CHG	GGCAG	NA	0	0	1
UBE2C	582	-	CHG	CCCTG	NA	0	0	1
UBE2C	583	-	CHH	GCCCT	NA	0	0	1
UBE2C	584	-	CHH	GGCCC	NA	0	0	1
UBE2C	585	+	CHH	GGCCT	NA	0	0	1
UBE2C	586	+	CHH	GCCTA	NA	0	0	1
UBE2C	589	+	CHH	TACAT	NA	0	0	1
UBE2C	592	+	CHH	ATCCT	NA	0	0	1
UBE2C	593	+	CHH	TCCTC	NA	0	0	1
UBE2C	595	+	CHH	CTCAC	NA	0	0	1
UBE2C	597	+	CHH	CACTT	NA	0	0	1
UBE2C	600	+	CHH	TTCCC	NA	0	0	1
UBE2C	601	+	CHH	TCCCC	NA	0	0	1
UBE2C	602	+	CHH	CCCCC	NA	0	0	1
UBE2C	603	+	CHH	CCCCA	NA	0	0	1
UBE2C	604	+	CHH	CCCAA	NA	0	0	1
UBE2C	607	+	CHH	AACTT	NA	0	0	1
UBE2C	610	+	CHH	TTCTC	NA	0	0	1
UBE2C	612	+	CHH	CTCTC	NA	0	0	1
UBE2C	614	+	CHH	CTCTT	NA	0	0	1
UBE2C	617	+	CHH	TTCAA	NA	0	0	1
UBE2C	621	-	CHH	GACAT	NA	0	0	1
UBE2C	623	+	CHG	GTCTG	NA	0	0	1
UBE2C	625	-	CHG	AACAG	NA	0	0	1
UBE2C	628	+	CHH	TTCCA	NA	0	0	1
UBE2C	629	+	CHG	TCCAG	NA	0	0	1
UBE2C	631	-	CHG	CTCTG	NA	0	0	1
UBE2C	633	-	CHH	TCCTC	NA	0	0	1
UBE2C	634	-	CHH	ATCCT	NA	0	0	1
UBE2C	637	-	CHH	GGCAT	NA	0	0	1
UBE2C	638	+	CHH	TGCCT	NA	0	0	1
UBE2C	639	+	CHG	GCCTG	NA	0	0	1
UBE2C	641	-	CHG	TCCAG	NA	0	0	1
UBE2C	642	-	CHH	ATCCA	NA	0	0	1
UBE2C	645	+	CHG	ATCTG	NA	0	0	1
UBE2C	647	-	CHG	TTCAG	NA	0	0	1
UBE2C	650	-	CHH	AGCTT	NA	0	0	1
UBE2C	651	+	CHH	AGCTA	NA	0	0	1
UBE2C	654	-	CHH	CTCTA	NA	0	0	1
UBE2C	656	-	CHH	TCCTC	NA	0	0	1
UBE2C	657	-	CHH	TTCCT	NA	0	0	1
UBE2C	662	-	CHH	TTCAA	NA	0	0	1
UBE2C	667	+	CHH	ATCCT	NA	0	0	1
UBE2C	668	+	CHH	TCCTT	NA	0	0	1
UBE2C	672	-	CHH	GACAA	NA	0	0	1
UBE2C	674	+	CHH	GTCCT	NA	0	0	1
UBE2C	675	+	CHH	TCCTA	NA	0	0	1
UBE2C	678	+	CHH	TACCC	NA	0	0	1
UBE2C	679	+	CHH	ACCCT	NA	0	0	1
UBE2C	680	+	CHH	CCCTC	NA	0	0	1
UBE2C	682	+	CHH	CTCCT	NA	0	0	1
UBE2C	683	+	CHG	TCCTG	NA	0	0	1
UBE2C	685	-	CHG	TCCAG	NA	0	0	1
UBE2C	686	-	CHH	ATCCA	NA	0	0	1
UBE2C	689	-	CHH	ACCAT	NA	0	0	1
UBE2C	690	-	CHH	CACCA	NA	0	0	1
UBE2C	692	-	CHH	TCCAC	NA	0	0	1
UBE2C	693	-	CHH	CTCCA	NA	0	0	1
UBE2C	695	-	CHH	TTCTC	NA	0	0	1
UBE2C	698	-	CHH	ATCTT	NA	0	0	1
UBE2C	701	-	CHH	CTCAT	NA	0	0	1
UBE2C	703	-	CHH	TTCTC	NA	0	0	1
UBE2C	707	-	CHH	TACTT	NA	0	0	1
UBE2C	713	-	CHH	TCCAT	NA	0	0	1
UBE2C	714	-	CHH	CTCCA	NA	0	0	1
UBE2C	716	-	CHH	GTCTC	NA	0	0	1
UBE2C	718	+	CHH	GACAC	NA	0	0	1
UBE2C	720	+	CHH	CACTA	NA	0	0	1
UBE2C	723	+	CG	TACGG	NA	0	0	1
UBE2C	724	-	CG	TCCGT	NA	0	0	1
UBE2C	725	-	CHG	GTCCG	NA	0	0	1
UBE2C	727	+	CHG	GACAG	NA	0	0	1
UBE2C	729	-	CHG	CTCTG	NA	0	0	1
UBE2C	731	-	CHH	TTCTC	NA	0	0	1
UBE2C	735	-	CHH	CTCAT	NA	0	0	1
UBE2C	737	-	CHH	TGCTC	NA	0	0	1
UBE2C	738	+	CHH	AGCAT	NA	0	0	1
UBE2C	741	+	CG	ATCGT	NA	0	0	1
UBE2C	742	-	CG	CACGA	NA	0	0	1
UBE2C	744	-	CHH	AGCAC	NA	0	0	1
UBE2C	745	+	CHG	TGCTG	NA	0	0	1
UBE2C	747	-	CHG	AACAG	NA	0	0	1
UBE2C	750	-	CHH	TTCAA	NA	0	0	1
UBE2C	753	-	CHH	TGCTT	NA	0	0	1
UBE2C	754	+	CHH	AGCAC	NA	0	0	1
UBE2C	756	+	CHH	CACCT	NA	0	0	1
UBE2C	757	+	CHH	ACCTC	NA	0	0	1
UBE2C	759	+	CHH	CTCCA	NA	0	0	1
UBE2C	760	+	CHH	TCCAC	NA	0	0	1
UBE2C	762	+	CHG	CACAG	NA	0	0	1
UBE2C	764	-	CHG	GTCTG	NA	0	0	1
UBE2C	766	+	CHH	GACCT	NA	0	0	1
UBE2C	767	+	CHG	ACCTG	NA	0	0	1
UBE2C	769	-	CHG	CTCAG	NA	0	0	1
UBE2C	771	-	CHH	GCCTC	NA	0	0	1
UBE2C	772	-	CHH	GGCCT	NA	0	0	1
UBE2C	773	+	CHG	GGCCG	NA	0	0	1
UBE2C	774	+	CG	GCCGG	NA	0	0	1
UBE2C	775	-	CG	CCCGG	NA	0	0	1
UBE2C	776	-	CHG	ACCCG	NA	0	0	1
UBE2C	777	-	CHH	GACCC	NA	0	0	1
UBE2C	779	+	CHH	GTCCC	NA	0	0	1
UBE2C	780	+	CHH	TCCCC	NA	0	0	1
UBE2C	781	+	CHH	CCCCT	NA	0	0	1
UBE2C	782	+	CHG	CCCTG	NA	0	0	1
UBE2C	784	-	CHG	GCCAG	NA	0	0	1
UBE2C	785	-	CHH	GGCCA	NA	0	0	1
UBE2C	786	+	CHH	GGCCA	NA	0	0	1
UBE2C	787	+	CHH	GCCAC	NA	0	0	1
UBE2C	789	+	CHH	CACAC	NA	0	0	1
UBE2C	791	+	CHH	CACTT	NA	0	0	1
UBE2C	794	-	CHH	GCCAA	NA	0	0	1
UBE2C	795	-	CHH	TGCCA	NA	0	0	1
UBE2C	796	+	CHG	GGCAG	NA	0	0	1
UBE2C	798	-	CHG	GGCTG	NA	0	0	1
UBE2C	799	+	CHH	AGCCC	NA	0	0	1
UBE2C	800	+	CHH	GCCCT	NA	0	0	1
UBE2C	801	+	CHH	CCCTC	NA	0	0	1
UBE2C	803	+	CHH	CTCCT	NA	0	0	1
UBE2C	804	+	CHH	TCCTC	NA	0	0	1
UBE2C	806	+	CHH	CTCCA	NA	0	0	1
UBE2C	807	+	CHH	TCCAA	NA	0	0	1
UBE2C	811	-	CHH	GGCTT	NA	0	0	1
UBE2C	812	+	CHH	AGCCC	NA	0	0	1
UBE2C	813	+	CHH	GCCCT	NA	0	0	1
UBE2C	814	+	CHH	CCCTC	NA	0	0	1
UBE2C	816	+	CHH	CTCTT	NA	0	0	1
UBE2C	819	+	CHH	TTCCT	NA	0	0	1
UBE2C	820	+	CHH	TCCTC	NA	0	0	1
UBE2C	822	+	CHH	CTCAC	NA	0	0	1
UBE2C	824	+	CG	CACGT	NA	0	0	1
UBE2C	825	-	CG	CACGT	NA	0	0	1
UBE2C	827	-	CHH	GCCAC	NA	0	0	1
UBE2C	828	-	CHH	AGCCA	NA	0	0	1
UBE2C	829	+	CHG	GGCTG	NA	0	0	1
UBE2C	831	-	CHG	CTCAG	NA	0	0	1
UBE2C	833	-	CHH	GCCTC	NA	0	0	1
UBE2C	834	-	CHH	GGCCT	NA	0	0	1
UBE2C	835	+	CHH	GGCCA	NA	0	0	1
UBE2C	836	+	CHH	GCCAC	NA	0	0	1
UBE2C	838	+	CHG	CACCG	NA	0	0	1
UBE2C	839	+	CG	ACCGC	NA	0	0	1
UBE2C	840	-	CG	AGCGG	NA	0	0	1
UBE2C	841	+	CHG	CGCTG	NA	0	0	1
UBE2C	843	-	CHG	CCCAG	NA	0	0	1
UBE2C	844	-	CHH	TCCCA	NA	0	0	1
UBE2C	845	-	CHH	GTCCC	NA	0	0	1
UBE2C	847	+	CHG	GACTG	NA	0	0	1
UBE2C	849	-	CHG	AGCAG	NA	0	0	1
UBE2C	850	+	CHH	TGCTC	NA	0	0	1
UBE2C	852	+	CHH	CTCCT	NA	0	0	1
UBE2C	853	+	CHH	TCCTA	NA	0	0	1
UBE2C	856	-	CHH	ATCTA	NA	0	0	1
UBE2C	859	-	CHH	TCCAT	NA	0	0	1
UBE2C	860	-	CHH	ATCCA	NA	0	0	1
UBE2C	863	+	CHH	ATCTC	NA	0	0	1
UBE2C	865	+	CHG	CTCAG	NA	0	0	1
UBE2C	867	-	CHG	CGCTG	NA	0	0	1
UBE2C	868	+	CG	AGCGG	NA	0	0	1
UBE2C	869	-	CG	GCCGC	NA	0	0	1
UBE2C	870	-	CHG	TGCCG	NA	0	0	1
UBE2C	871	+	CHH	GGCAT	NA	0	0	1
UBE2C	877	-	CHH	AGCTT	NA	0	0	1
UBE2C	878	+	CHG	AGCTG	NA	0	0	1
UBE2C	880	-	CHG	CACAG	NA	0	0	1
UBE2C	882	-	CHH	GGCAC	NA	0	0	1
UBE2C	883	+	CHH	TGCCT	NA	0	0	1
UBE2C	884	+	CHG	GCCTG	NA	0	0	1
UBE2C	886	-	CHG	CTCAG	NA	0	0	1
UBE2C	888	-	CHH	CGCTC	NA	0	0	1
UBE2C	889	+	CG	AGCGA	NA	0	0	1
UBE2C	890	-	CG	CTCGC	NA	0	0	1
UBE2C	892	-	CHH	AACTC	NA	0	0	1
UBE2C	896	-	CHH	TACAA	NA	0	0	1
UBE2C	899	-	CHH	CACTA	NA	0	0	1
UBE2C	901	-	CHH	GTCAC	NA	0	0	1
UBE2C	903	+	CHH	GACTC	NA	0	0	1
UBE2C	905	+	CHH	CTCAC	NA	0	0	1
UBE2C	907	+	CHG	CACTG	NA	0	0	1
UBE2C	909	-	CHG	TGCAG	NA	0	0	1
UBE2C	910	+	CHH	TGCAC	NA	0	0	1
UBE2C	912	+	CHG	CACAG	NA	0	0	1
UBE2C	914	-	CHG	TGCTG	NA	0	0	1
UBE2C	915	+	CHH	AGCAC	NA	0	0	1
UBE2C	917	+	CHH	CACCC	NA	0	0	1
UBE2C	918	+	CHH	ACCCC	NA	0	0	1
UBE2C	919	+	CHH	CCCCC	NA	0	0	1
UBE2C	920	+	CHH	CCCCA	NA	0	0	1
UBE2C	921	+	CHG	CCCAG	NA	0	0	1
UBE2C	923	-	CHG	GTCTG	NA	0	0	1
UBE2C	925	+	CHH	GACTA	NA	0	0	1
UBE2C	928	-	CHH	TGCTA	NA	0	0	1
UBE2C	929	+	CHH	AGCAT	NA	0	0	1
UBE2C	932	-	CHH	CACAT	NA	0	0	1
UBE2C	934	-	CHH	ACCAC	NA	0	0	1
UBE2C	935	-	CHH	AACCA	NA	0	0	1
UBE2C	938	+	CHH	TTCTA	NA	0	0	1
UBE2C	946	-	CHH	TACAA	NA	0	0	1
UBE2C	951	-	CHH	AACTT	NA	0	0	1
UBE2C	957	-	CHH	CCCAA	NA	0	0	1
UBE2C	958	-	CHH	TCCCA	NA	0	0	1
UBE2C	959	-	CHH	ATCCC	NA	0	0	1
UBE2C	964	-	CHH	TTCTT	NA	0	0	1
UBE2C	968	+	CHH	AACAA	NA	0	0	1
UBE2C	976	+	CHG	AACAG	NA	0	0	1
UBE2C	978	-	CHG	AACTG	NA	0	0	1
UBE2C	982	-	CHH	TACAA	NA	0	0	1
UBE2C	985	-	CHH	TACTA	NA	0	0	1
UBE2C	990	+	CHH	AACAC	NA	0	0	1
UBE2C	992	+	CHG	CACAG	NA	0	0	1
UBE2C	994	-	CHG	ATCTG	NA	0	0	1
UBE2C	997	-	CHH	ACCAT	NA	0	0	1
UBE2C	998	-	CHH	CACCA	NA	0	0	1
UBE2C	1000	-	CHH	TTCAC	NA	0	0	1
UBE2C	1003	+	CHH	AACCT	NA	0	0	1
UBE2C	1004	+	CHG	ACCTG	NA	0	0	1
UBE2C	1006	-	CHG	AGCAG	NA	0	0	1
UBE2C	1007	+	CHG	TGCTG	NA	0	0	1
UBE2C	1009	-	CHG	CACAG	NA	0	0	1
UBE2C	1011	-	CHH	GGCAC	NA	0	0	1
UBE2C	1012	+	CHH	TGCCC	NA	0	0	1
UBE2C	1013	+	CHH	GCCCT	NA	0	0	1
UBE2C	1014	+	CHH	CCCTC	NA	0	0	1
UBE2C	1016	+	CHH	CTCTA	NA	0	0	1
UBE2C	1019	+	CHH	TACCT	NA	0	0	1
UBE2C	1020	+	CHH	ACCTT	NA	0	0	1
UBE2C	1023	-	CHH	CACAA	NA	0	0	1
UBE2C	1025	-	CHH	CCCAC	NA	0	0	1
UBE2C	1026	-	CHH	TCCCA	NA	0	0	1
UBE2C	1027	-	CHH	TTCCC	NA	0	0	1
UBE2C	1032	-	CHH	GTCAA	NA	0	0	1
UBE2C	1034	+	CHG	GACAG	NA	0	0	1
UBE2C	1036	-	CHG	TTCTG	NA	0	0	1
UBE2C	1039	+	CHH	AACAT	NA	0	0	1
UBE2C	1042	+	CHH	ATCAA	NA	0	0	1
UBE2C	1045	-	CHH	CCCTT	NA	0	0	1
UBE2C	1046	-	CHH	GCCCT	NA	0	0	1
UBE2C	1047	-	CHH	AGCCC	NA	0	0	1
UBE2C	1048	+	CHH	GGCTC	NA	0	0	1
UBE2C	1050	+	CHH	CTCTA	NA	0	0	1
UBE2C	1053	-	CHH	TTCTA	NA	0	0	1
UBE2C	1056	-	CHH	CACTT	NA	0	0	1
UBE2C	1058	-	CHH	CCCAC	NA	0	0	1
UBE2C	1059	-	CHH	ACCCA	NA	0	0	1
UBE2C	1060	-	CHH	CACCC	NA	0	0	1
UBE2C	1062	-	CHH	TACAC	NA	0	0	1
UBE2C	1065	-	CHH	TCCTA	NA	0	0	1
UBE2C	1066	-	CHH	TTCCT	NA	0	0	1
UBE2C	1073	-	CHH	TCCTT	NA	0	0	1
UBE2C	1074	-	CHH	GTCCT	NA	0	0	1
UBE2C	1076	+	CG	GACGA	NA	0	0	1
UBE2C	1077	-	CG	CTCGT	NA	0	0	1
UBE2C	1079	-	CHH	ATCTC	NA	0	0	1
UBE2C	1084	+	CHH	AACCC	NA	0	0	1
UBE2C	1085	+	CHH	ACCCT	NA	0	0	1
UBE2C	1086	+	CHH	CCCTC	NA	0	0	1
UBE2C	1088	+	CHH	CTCAC	NA	0	0	1
UBE2C	1090	+	CHH	CACCC	NA	0	0	1
UBE2C	1091	+	CHH	ACCCA	NA	0	0	1
UBE2C	1092	+	CHH	CCCAT	NA	0	0	1
UBE2C	1097	+	CHG	AACAG	NA	0	0	1
UBE2C	1099	-	CHG	TACTG	NA	0	0	1
UBE2C	1104	-	CHH	CTCTA	NA	0	0	1
UBE2C	1106	-	CHH	GGCTC	NA	0	0	1
UBE2C	1107	+	CHH	AGCCA	NA	0	0	1
UBE2C	1108	+	CHG	GCCAG	NA	0	0	1
UBE2C	1110	-	CHG	GCCTG	NA	0	0	1
UBE2C	1111	-	CHH	AGCCT	NA	0	0	1
UBE2C	1112	+	CHH	GGCTT	NA	0	0	1
UBE2C	1115	-	CHH	ATCAA	NA	0	0	1
UBE2C	1120	-	CHH	GTCTT	NA	0	0	1
UBE2C	1122	+	CHH	GACCA	NA	0	0	1
UBE2C	1123	+	CHH	ACCAA	NA	0	0	1
UBE2C	1126	+	CHH	AACCT	NA	0	0	1
UBE2C	1127	+	CHG	ACCTG	NA	0	0	1
UBE2C	1129	-	CHG	CCCAG	NA	0	0	1
UBE2C	1130	-	CHH	TCCCA	NA	0	0	1
UBE2C	1131	-	CHH	CTCCC	NA	0	0	1
UBE2C	1133	-	CHH	TGCTC	NA	0	0	1
UBE2C	1134	+	CHH	AGCAC	NA	0	0	1
UBE2C	1136	+	CHH	CACCA	NA	0	0	1
UBE2C	1137	+	CHH	ACCAT	NA	0	0	1
UBE2C	1140	-	CHH	TACAT	NA	0	0	1
UBE2C	1143	+	CHH	TACCC	NA	0	0	1
UBE2C	1144	+	CHH	ACCCT	NA	0	0	1
UBE2C	1145	+	CHG	CCCTG	NA	0	0	1
UBE2C	1147	-	CHG	GGCAG	NA	0	0	1
UBE2C	1148	+	CHH	TGCCC	NA	0	0	1
UBE2C	1149	+	CHG	GCCCG	NA	0	0	1
UBE2C	1150	+	CG	CCCGT	NA	0	0	1
UBE2C	1151	-	CG	GACGG	NA	0	0	1
UBE2C	1153	+	CHH	GTCTT	NA	0	0	1
UBE2C	1156	+	CHH	TTCCC	NA	0	0	1
UBE2C	1157	+	CHH	TCCCT	NA	0	0	1
UBE2C	1158	+	CHH	CCCTT	NA	0	0	1
UBE2C	1162	-	CHH	GGCAA	NA	0	0	1
UBE2C	1163	+	CHH	TGCCC	NA	0	0	1
UBE2C	1164	+	CHH	GCCCA	NA	0	0	1
UBE2C	1165	+	CHH	CCCAT	NA	0	0	1
UBE2C	1170	-	CHH	TACAA	NA	0	0	1
UBE2C	1173	-	CHH	AACTA	NA	0	0	1
UBE2C	1177	+	CHH	TTCCT	NA	0	0	1
UBE2C	1178	+	CHH	TCCTT	NA	0	0	1
UBE2C	1182	+	CHH	TACCC	NA	0	0	1
UBE2C	1183	+	CHH	ACCCA	NA	0	0	1
UBE2C	1184	+	CHG	CCCAG	NA	0	0	1
UBE2C	1186	-	CHG	AGCTG	NA	0	0	1
UBE2C	1187	+	CHH	AGCTA	NA	0	0	1
UBE2C	1192	-	CHH	TACAT	NA	0	0	1
UBE2C	1196	-	CHH	TCCTT	NA	0	0	1
UBE2C	1197	-	CHH	GTCCT	NA	0	0	1
UBE2C	1199	+	CHH	GACAT	NA	0	0	1
UBE2C	1202	-	CHH	GCCAT	NA	0	0	1
UBE2C	1203	-	CHH	TGCCA	NA	0	0	1
UBE2C	1204	+	CHG	GGCAG	NA	0	0	1
UBE2C	1206	-	CHG	TTCTG	NA	0	0	1
UBE2C	1210	-	CHH	CGCAT	NA	0	0	1
UBE2C	1211	+	CG	TGCGA	NA	0	0	1
UBE2C	1212	-	CG	ATCGC	NA	0	0	1
UBE2C	1215	-	CHH	TCCAT	NA	0	0	1
UBE2C	1216	-	CHH	CTCCA	NA	0	0	1
UBE2C	1218	-	CHH	AACTC	NA	0	0	1
UBE2C	1222	-	CHH	ATCAA	NA	0	0	1
UBE2C	1225	-	CHH	GTCAT	NA	0	0	1
UBE2C	1227	+	CHG	GACAG	NA	0	0	1
UBE2C	1229	-	CHG	ATCTG	NA	0	0	1
UBE2C	1232	+	CHH	ATCAT	NA	0	0	1
UBE2C	1237	-	CHH	TTCAT	NA	0	0	1
UBE2C	1245	-	CHH	CTCTA	NA	0	0	1
UBE2C	1247	-	CHH	AACTC	NA	0	0	1
UBE2C	1250	-	CHH	GCCAA	NA	0	0	1
UBE2C	1251	-	CHH	AGCCA	NA	0	0	1
UBE2C	1252	+	CHH	GGCTT	NA	0	0	1
UBE2C	1260	-	CHH	AGCAA	NA	0	0	1
UBE2C	1261	+	CHH	TGCTC	NA	0	0	1
UBE2C	1263	+	CHH	CTCCC	NA	0	0	1
UBE2C	1264	+	CHH	TCCCA	NA	0	0	1
UBE2C	1265	+	CHH	CCCAT	NA	0	0	1
UBE2C	1272	+	CHG	TACAG	NA	0	0	1
UBE2C	1274	-	CHG	ACCTG	NA	0	0	1
UBE2C	1275	-	CHH	AACCT	NA	0	0	1
UBE2C	1280	-	CHH	ATCTT	NA	0	0	1
UBE2C	1284	+	CHH	TACTA	NA	0	0	1
UBE2C	1289	-	CHH	TCCTT	NA	0	0	1
UBE2C	1290	-	CHH	GTCCT	NA	0	0	1
UBE2C	1292	+	CHH	GACCC	NA	0	0	1
UBE2C	1293	+	CHG	ACCCG	NA	0	0	1
UBE2C	1294	+	CG	CCCGC	NA	0	0	1
UBE2C	1295	-	CG	GGCGG	NA	0	0	1
UBE2C	1296	+	CHH	CGCCC	NA	0	0	1
UBE2C	1297	+	CHH	GCCCC	NA	0	0	1
UBE2C	1298	+	CHH	CCCCA	NA	0	0	1
UBE2C	1299	+	CHH	CCCAA	NA	0	0	1
UBE2C	1302	-	CHH	ACCTT	NA	0	0	1
UBE2C	1303	-	CHH	AACCT	NA	0	0	1
UBE2C	1307	+	CHH	TACAC	NA	0	0	1
UBE2C	1309	+	CHH	CACAC	NA	0	0	1
UBE2C	1311	+	CHH	CACTA	NA	0	0	1
UBE2C	1314	+	CHH	TACCC	NA	0	0	1
UBE2C	1315	+	CHH	ACCCA	NA	0	0	1
UBE2C	1316	+	CHH	CCCAC	NA	0	0	1
UBE2C	1318	+	CHG	CACTG	NA	0	0	1
UBE2C	1320	-	CHG	CCCAG	NA	0	0	1
UBE2C	1321	-	CHH	CCCCA	NA	0	0	1
UBE2C	1322	-	CHH	TCCCC	NA	0	0	1
UBE2C	1323	-	CHH	CTCCC	NA	0	0	1
UBE2C	1325	-	CHH	ACCTC	NA	0	0	1
UBE2C	1326	-	CHH	TACCT	NA	0	0	1
UBE2C	1329	-	CHH	TCCTA	NA	0	0	1
UBE2C	1330	-	CHH	ATCCT	NA	0	0	1
UBE2C	1336	+	CHG	TACAG	NA	0	0	1
UBE2C	1338	-	CHG	TCCTG	NA	0	0	1
UBE2C	1339	-	CHH	ATCCT	NA	0	0	1
UBE2C	1344	-	CHH	TTCAT	NA	0	0	1
UBE2C	1347	+	CHH	AACCT	NA	0	0	1
UBE2C	1348	+	CHG	ACCTG	NA	0	0	1
UBE2C	1350	-	CHG	CACAG	NA	0	0	1
UBE2C	1352	-	CHH	AACAC	NA	0	0	1
UBE2C	1355	-	CHH	AACAA	NA	0	0	1
UBE2C	1358	-	CHH	CCCAA	NA	0	0	1
UBE2C	1359	-	CHH	CCCCA	NA	0	0	1
UBE2C	1360	-	CHH	ACCCC	NA	0	0	1
UBE2C	1361	-	CHH	AACCC	NA	0	0	1
UBE2C	1367	-	CHH	AACAA	NA	0	0	1
UBE2C	1371	-	CHH	AACAA	NA	0	0	1
UBE2C	1375	-	CHH	TTCAA	NA	0	0	1
UBE2C	1378	-	CHH	GTCTT	NA	0	0	1
UBE2C	1380	+	CHG	GACAG	NA	0	0	1
UBE2C	1382	-	CHG	GACTG	NA	0	0	1
UBE2C	1384	+	CHH	GTCTT	NA	0	0	1
UBE2C	1387	-	CHH	AGCAA	NA	0	0	1
UBE2C	1388	+	CHH	TGCTC	NA	0	0	1
UBE2C	1390	+	CHG	CTCTG	NA	0	0	1
UBE2C	1392	-	CHG	AACAG	NA	0	0	1
UBE2C	1395	-	CHH	GGCAA	NA	0	0	1
UBE2C	1396	+	CHH	TGCCC	NA	0	0	1
UBE2C	1397	+	CHH	GCCCA	NA	0	0	1
UBE2C	1398	+	CHG	CCCAG	NA	0	0	1
UBE2C	1400	-	CHG	GCCTG	NA	0	0	1
UBE2C	1401	-	CHH	AGCCT	NA	0	0	1
UBE2C	1402	+	CHH	GGCTA	NA	0	0	1
UBE2C	1405	-	CHH	CTCTA	NA	0	0	1
UBE2C	1407	-	CHH	CACTC	NA	0	0	1
UBE2C	1409	-	CHH	TGCAC	NA	0	0	1
UBE2C	1410	+	CHG	TGCAG	NA	0	0	1
UBE2C	1412	-	CHG	GGCTG	NA	0	0	1
UBE2C	1413	+	CHH	AGCCT	NA	0	0	1
UBE2C	1414	+	CHH	GCCTC	NA	0	0	1
UBE2C	1416	+	CHG	CTCTG	NA	0	0	1
UBE2C	1418	-	CHG	GCCAG	NA	0	0	1
UBE2C	1419	-	CHH	AGCCA	NA	0	0	1
UBE2C	1420	+	CHH	GGCTC	NA	0	0	1
UBE2C	1422	+	CHH	CTCAA	NA	0	0	1
UBE2C	1425	-	CHH	CGCTT	NA	0	0	1
UBE2C	1426	+	CG	AGCGA	NA	0	0	1
UBE2C	1427	-	CG	ATCGC	NA	0	0	1
UBE2C	1431	+	CHH	TTCTC	NA	0	0	1
UBE2C	1433	+	CHH	CTCCC	NA	0	0	1
UBE2C	1434	+	CHG	TCCCG	NA	0	0	1
UBE2C	1435	+	CG	CCCGC	NA	0	0	1
UBE2C	1436	-	CG	GGCGG	NA	0	0	1
UBE2C	1437	+	CHH	CGCCT	NA	0	0	1
UBE2C	1438	+	CHH	GCCTC	NA	0	0	1
UBE2C	1440	+	CHG	CTCAG	NA	0	0	1
UBE2C	1442	-	CHG	GGCTG	NA	0	0	1
UBE2C	1443	+	CHH	AGCCT	NA	0	0	1
UBE2C	1444	+	CHH	GCCTC	NA	0	0	1
UBE2C	1446	+	CG	CTCGC	NA	0	0	1
UBE2C	1447	-	CG	GGCGA	NA	0	0	1
UBE2C	1448	+	CHH	CGCCA	NA	0	0	1
UBE2C	1449	+	CHG	GCCAG	NA	0	0	1
UBE2C	1451	-	CHG	TACTG	NA	0	0	1
UBE2C	1454	-	CHH	AGCTA	NA	0	0	1
UBE2C	1455	+	CHG	AGCTG	NA	0	0	1
UBE2C	1457	-	CHG	CCCAG	NA	0	0	1
UBE2C	1458	-	CHH	TCCCA	NA	0	0	1
UBE2C	1459	-	CHH	GTCCC	NA	0	0	1
UBE2C	1461	+	CHH	GACTA	NA	0	0	1
UBE2C	1464	+	CHG	TACAG	NA	0	0	1
UBE2C	1466	-	CHG	GCCTG	NA	0	0	1
UBE2C	1467	-	CHH	AGCCT	NA	0	0	1
UBE2C	1468	+	CHH	GGCTC	NA	0	0	1
UBE2C	1470	+	CG	CTCGT	NA	0	0	1
UBE2C	1471	-	CG	CACGA	NA	0	0	1
UBE2C	1473	-	CHH	GGCAC	NA	0	0	1
UBE2C	1474	+	CHH	TGCCA	NA	0	0	1
UBE2C	1475	+	CHH	GCCAC	NA	0	0	1
UBE2C	1477	+	CHH	CACCT	NA	0	0	1
UBE2C	1478	+	CHH	ACCTC	NA	0	0	1
UBE2C	1480	+	CHH	CTCAC	NA	0	0	1
UBE2C	1482	+	CHH	CACCA	NA	0	0	1
UBE2C	1483	+	CHG	ACCAG	NA	0	0	1
UBE2C	1485	-	CHG	GGCTG	NA	0	0	1
UBE2C	1486	+	CHH	AGCCT	NA	0	0	1
UBE2C	1487	+	CHH	GCCTT	NA	0	0	1
UBE2C	1500	+	CHH	TTCTT	NA	0	0	1
UBE2C	1505	+	CHH	TTCTT	NA	0	0	1
UBE2C	1521	+	CHH	TTCTT	NA	0	0	1
UBE2C	1528	-	CHH	TACTT	NA	0	0	1
UBE2C	1531	-	CHH	CTCTA	NA	0	0	1
UBE2C	1533	-	CHH	GTCTC	NA	0	0	1
UBE2C	1535	+	CHG	GACAG	NA	0	0	1
UBE2C	1537	-	CHG	ACCTG	NA	0	0	1
UBE2C	1538	-	CHH	GACCT	NA	0	0	1
UBE2C	1540	+	CHH	GTCTC	NA	0	0	1
UBE2C	1542	+	CHH	CTCCC	NA	0	0	1
UBE2C	1543	+	CHH	TCCCT	NA	0	0	1
UBE2C	1544	+	CHH	CCCTA	NA	0	0	1
UBE2C	1548	+	CHH	ATCCT	NA	0	0	1
UBE2C	1549	+	CHG	TCCTG	NA	0	0	1
UBE2C	1551	-	CHG	AACAG	NA	0	0	1
UBE2C	1554	-	CHH	AGCAA	NA	0	0	1
UBE2C	1555	+	CHH	TGCTC	NA	0	0	1
UBE2C	1557	+	CHG	CTCAG	NA	0	0	1
UBE2C	1559	-	CHG	GCCTG	NA	0	0	1
UBE2C	1560	-	CHH	AGCCT	NA	0	0	1
UBE2C	1561	+	CHG	GGCTG	NA	0	0	1
UBE2C	1563	-	CHG	ACCAG	NA	0	0	1
UBE2C	1564	-	CHH	GACCA	NA	0	0	1
UBE2C	1566	+	CHH	GTCTC	NA	0	0	1
UBE2C	1568	+	CG	CTCGA	0	0	3	1
UBE2C	1569	-	CG	TTCGA	NA	0	0	1
UBE2C	1572	+	CHH	AACTC	0.214	3	11	0.0300536
UBE2C	1574	+	CHH	CTCCT	0.001	223	342825	1
UBE2C	1575	+	CHG	TCCTG	0.001	505	662433	1
UBE2C	1577	-	CHG	CCCAG	NA	0	0	1
UBE2C	1578	-	CHH	ACCCA	NA	0	0	1
UBE2C	1579	-	CHH	AACCC	NA	0	0	1
UBE2C	1582	+	CHH	TTCAA	0	138	346259	1
UBE2C	1585	-	CHH	CACTT	NA	0	0	1
UBE2C	1587	-	CHH	ATCAC	NA	0	0	1
UBE2C	1590	+	CHH	ATCCT	0.001	350	346650	1
UBE2C	1591	+	CHH	TCCTC	0.001	284	346750	1
UBE2C	1593	+	CHH	CTCCT	0.001	290	346648	1
UBE2C	1594	+	CHG	TCCTG	0.001	229	346022	1
UBE2C	1596	-	CHG	GGCAG	NA	0	0	1
UBE2C	1597	+	CHH	TGCCT	0.001	304	345921	1
UBE2C	1598	+	CHG	GCCTG	0.001	259	345355	1
UBE2C	1600	-	CHG	CCCAG	NA	0	0	1
UBE2C	1601	-	CHH	GCCCA	NA	0	0	1
UBE2C	1602	-	CHH	GGCCC	NA	0	0	1
UBE2C	1603	+	CHH	GGCCT	0.005	1685	345199	1
UBE2C	1604	+	CHH	GCCTT	0.005	1861	345161	1
UBE2C	1607	+	CHH	TTCCA	0.005	1590	345344	1
UBE2C	1608	+	CHH	TCCAA	0.006	2136	344648	1
UBE2C	1612	-	CHH	CACTT	NA	0	0	1
UBE2C	1614	-	CHH	AACAC	NA	0	0	1
UBE2C	1617	+	CG	TTCGG	0.46	159378	187380	0
UBE2C	1618	-	CG	CCCGA	NA	0	0	1
UBE2C	1619	-	CHG	TCCCG	NA	0	0	1
UBE2C	1620	-	CHH	ATCCC	NA	0	0	1
UBE2C	1625	+	CG	TACGG	0.008	2838	343925	1
UBE2C	1626	-	CG	TCCGT	NA	0	0	1
UBE2C	1627	-	CHG	GTCCG	NA	0	0	1
UBE2C	1629	+	CG	GACGT	0.398	138300	208763	0
UBE2C	1630	-	CG	CACGT	NA	0	0	1
UBE2C	1632	-	CHH	CTCAC	NA	0	0	1
UBE2C	1634	-	CHH	GGCTC	NA	0	0	1
UBE2C	1635	+	CHH	AGCCA	0.006	2178	345005	1
UBE2C	1636	+	CHH	GCCAC	0.005	1769	345100	1
UBE2C	1638	+	CHG	CACTG	0.007	2479	344248	1
UBE2C	1640	-	CHG	CGCAG	NA	0	0	1
UBE2C	1641	+	CG	TGCGA	0.492	170587	176376	0
UBE2C	1642	-	CG	GTCGC	NA	0	0	1
UBE2C	1644	+	CHH	GACCA	0.006	1957	345345	1
UBE2C	1645	+	CHG	ACCAG	0.007	2581	344187	1
UBE2C	1647	-	CHG	GGCTG	NA	0	0	1
UBE2C	1648	+	CHH	AGCCT	0.005	1888	344869	1
UBE2C	1649	+	CHG	GCCTG	0.006	1941	344996	1
UBE2C	1651	-	CHG	TTCAG	NA	0	0	1
UBE2C	1654	+	CHH	AACCA	0.005	1797	345037	1
UBE2C	1655	+	CHH	ACCAA	0.008	2753	344169	1
UBE2C	1659	-	CHH	AACAT	NA	0	0	1
UBE2C	1662	-	CHH	GGCAA	NA	0	0	1
UBE2C	1663	+	CHH	TGCCT	0.006	2165	344262	1
UBE2C	1664	+	CHH	GCCTT	0.009	3181	343313	1
UBE2C	1676	+	CHG	TTCTG	0.004	1243	345440	1
UBE2C	1678	-	CHG	GACAG	NA	0	0	1
UBE2C	1680	+	CHH	GTCAT	0.005	1847	343405	1
UBE2C	1683	+	CHH	ATCTC	0.005	1683	344734	1
UBE2C	1685	+	CHG	CTCTG	0.005	1609	344824	1
UBE2C	1687	-	CHG	CGCAG	NA	0	0	1
UBE2C	1688	+	CG	TGCGG	0.405	139071	204472	0
UBE2C	1689	-	CG	TCCGC	NA	0	0	1
UBE2C	1690	-	CHG	CTCCG	NA	0	0	1
UBE2C	1692	-	CHH	ATCTC	NA	0	0	1
UBE2C	1695	-	CHH	TACAT	NA	0	0	1
UBE2C	1699	-	CHH	TCCAT	NA	0	0	1
UBE2C	1700	-	CHH	GTCCA	NA	0	0	1
UBE2C	1702	+	CHH	GACCT	0.002	836	340051	1
UBE2C	1703	+	CHH	ACCTA	0.003	857	340000	1
UBE2C	1707	-	CHH	AACAT	NA	0	0	1
UBE2C	1712	+	CHH	TTCTA	0.002	561	340091	1
UBE2C	1718	-	CHH	CCCTA	NA	0	0	1
UBE2C	1719	-	CHH	TCCCT	NA	0	0	1
UBE2C	1720	-	CHH	CTCCC	NA	0	0	1
UBE2C	1722	-	CHH	GGCTC	NA	0	0	1
UBE2C	1723	+	CHH	AGCCT	0	0	1	1
UBE2C	1724	+	CHG	GCCTG	0	0	1	1
UBE2C	1726	-	CHG	AGCAG	NA	0	0	1
UBE2C	1727	+	CHG	TGCTG	0	0	1	1
UBE2C	1729	-	CHG	AGCAG	NA	0	0	1
UBE2C	1730	+	CHH	TGCTC	0	0	1	1
UBE2C	1732	+	CHG	CTCTG	0	0	1	1
UBE2C	1734	-	CHG	GCCAG	NA	0	0	1
UBE2C	1735	-	CHH	GGCCA	NA	0	0	1
UBE2C	1736	+	CHH	GGCCA	0	0	1	1
UBE2C	1737	+	CHH	GCCAT	0	0	3	1
UBE2C	1740	+	CHG	ATCAG	0	0	5	1
UBE2C	1742	-	CHG	GGCTG	NA	0	0	1
UBE2C	1743	+	CHH	AGCCT	0	0	3	1
UBE2C	1744	+	CHH	GCCTT	0	0	3	1
UBE2C	1749	-	CHH	AACTA	NA	0	0	1
UBE2C	1755	+	CHH	TTCCC	0	0	6	1
UBE2C	1756	+	CHH	TCCCC	0	0	6	1
UBE2C	1757	+	CHH	CCCCT	0	0	6	1
UBE2C	1758	+	CHH	CCCTC	0	0	6	1
UBE2C	1760	+	CG	CTCGC	0.333	2	4	0.0327738
UBE2C	1761	-	CG	AGCGA	NA	0	0	1
UBE2C	1762	+	CHG	CGCTG	0	0	6	1
UBE2C	1764	-	CHG	CCCAG	NA	0	0	1
UBE2C	1765	-	CHH	TCCCA	NA	0	0	1
UBE2C	1766	-	CHH	ATCCC	NA	0	0	1
UBE2C	1772	+	CHG	TTCAG	0	0	6	1
UBE2C	1774	-	CHG	ATCTG	NA	0	0	1
UBE2C	1778	+	CHH	TACTT	0.001	351	542850	1
UBE2C	1782	-	CHH	TCCTA	NA	0	0	1
UBE2C	1783	-	CHH	GTCCT	NA	0	0	1
UBE2C	1785	+	CG	GACGC	0.271	293731	790293	0
UBE2C	1786	-	CG	TGCGT	NA	0	0	1
UBE2C	1787	+	CHG	CGCAG	0.001	521	551349	1
UBE2C	1789	-	CHG	TGCTG	NA	0	0	1
UBE2C	1790	+	CHH	AGCAA	0	211	554129	1
UBE2C	1794	-	CHH	ACCTT	NA	0	0	1
UBE2C	1795	-	CHH	CACCT	NA	0	0	1
UBE2C	1797	-	CHH	GGCAC	NA	0	0	1
UBE2C	1798	+	CHH	TGCCC	0.001	472	557034	1
UBE2C	1799	+	CHH	GCCCA	0.001	412	557729	1
UBE2C	1800	+	CHG	CCCAG	0	270	557384	1
UBE2C	1802	-	CHG	GCCTG	NA	0	0	1
UBE2C	1803	-	CHH	CGCCT	NA	0	0	1
UBE2C	1804	+	CG	GGCGA	0.117	65130	492881	1.15026e-16
UBE2C	1805	-	CG	ATCGC	NA	0	0	1
UBE2C	1814	-	CHH	ACCAT	NA	0	0	1
UBE2C	1815	-	CHH	CACCA	NA	0	0	1
UBE2C	1817	-	CHH	CCCAC	NA	0	0	1
UBE2C	1818	-	CHH	TCCCA	NA	0	0	1
UBE2C	1819	-	CHH	CTCCC	NA	0	0	1
UBE2C	1821	-	CHH	CCCTC	NA	0	0	1
UBE2C	1822	-	CHH	ACCCT	NA	0	0	1
UBE2C	1823	-	CHH	TACCC	NA	0	0	1
UBE2C	1826	+	CHH	TACCA	0.004	2398	555722	1
UBE2C	1827	+	CHG	ACCAG	0.008	4634	552934	1
UBE2C	1829	-	CHG	CACTG	NA	0	0	1
UBE2C	1831	-	CHH	AGCAC	NA	0	0	1
UBE2C	1832	+	CHG	TGCTG	0.009	5078	552864	1
UBE2C	1834	-	CHG	TGCAG	NA	0	0	1
UBE2C	1835	+	CHG	TGCAG	0.006	3421	554122	1
UBE2C	1837	-	CHG	TCCTG	NA	0	0	1
UBE2C	1838	-	CHH	ATCCT	NA	0	0	1
UBE2C	1842	-	CHH	TCCAA	NA	0	0	1
UBE2C	1843	-	CHH	CTCCA	NA	0	0	1
UBE2C	1845	-	CHH	GCCTC	NA	0	0	1
UBE2C	1846	-	CHH	TGCCT	NA	0	0	1
UBE2C	1847	+	CHH	GGCAC	0.005	3043	555120	1
UBE2C	1849	+	CHH	CACTC	0.006	3266	554863	1
UBE2C	1851	+	CHH	CTCCC	0.008	4443	553573	1
UBE2C	1852	+	CHH	TCCCT	0.004	2435	555562	1
UBE2C	1853	+	CHG	CCCTG	0.007	3644	554265	1
UBE2C	1855	-	CHG	GGCAG	NA	0	0	1
UBE2C	1856	+	CHH	TGCCC	0.004	2324	555521	1
UBE2C	1857	+	CHG	GCCCG	0.008	4338	553682	1
UBE2C	1858	+	CG	CCCGA	0.006	3310	554677	1
UBE2C	1859	-	CG	CTCGG	NA	0	0	1
UBE2C	1861	-	CHH	CCCTC	NA	0	0	1
UBE2C	1862	-	CHH	TCCCT	NA	0	0	1
UBE2C	1863	-	CHH	TTCCC	NA	0	0	1
UBE2C	1869	-	CHH	TCCAA	NA	0	0	1
UBE2C	1870	-	CHH	ATCCA	NA	0	0	1
UBE2C	1873	+	CHH	ATCAA	0.005	2680	555014	1
UBE2C	1876	-	CHH	GCCTT	NA	0	0	1
UBE2C	1877	-	CHH	AGCCT	NA	0	0	1
UBE2C	1878	+	CHG	GGCTG	0.006	3162	554952	1
UBE2C	1880	-	CHG	CCCAG	NA	0	0	1
UBE2C	1881	-	CHH	GCCCA	NA	0	0	1
UBE2C	1882	-	CHH	CGCCC	NA	0	0	1
UBE2C	1883	+	CG	GGCGT	0.008	4417	553728	1
UBE2C	1884	-	CG	CACGC	NA	0	0	1
UBE2C	1886	-	CHH	GGCAC	NA	0	0	1
UBE2C	1887	+	CHG	TGCCG	0.008	4513	553727	1
UBE2C	1888	+	CG	GCCGA	0.008	4625	553480	1
UBE2C	1889	-	CG	CTCGG	NA	0	0	1
UBE2C	1891	-	CHH	CACTC	NA	0	0	1
UBE2C	1893	-	CHH	AACAC	NA	0	0	1
UBE2C	1896	+	CHH	TTCCC	0.004	2490	555733	1
UBE2C	1897	+	CHH	TCCCA	0.006	3306	554798	1
UBE2C	1898	+	CHH	CCCAC	0.007	3747	554493	1
UBE2C	1900	+	CG	CACGC	0.005	2840	555316	1
UBE2C	1901	-	CG	CGCGT	NA	0	0	1
UBE2C	1902	+	CG	CGCGG	0.006	3525	554244	1
UBE2C	1903	-	CG	TCCGC	NA	0	0	1
UBE2C	1904	-	CHG	CTCCG	NA	0	0	1
UBE2C	1906	-	CHH	TACTC	NA	0	0	1
UBE2C	1910	-	CHH	GTCTT	NA	0	0	1
UBE2C	1912	+	CG	GACGT	0.273	152160	405717	0
UBE2C	1913	-	CG	CACGT	NA	0	0	1
UBE2C	1915	-	CHH	TACAC	NA	0	0	1
UBE2C	1918	-	CHH	GGCTA	NA	0	0	1
UBE2C	1919	+	CHH	AGCCA	0.003	1603	556443	1
UBE2C	1920	+	CHG	GCCAG	0.002	1097	555532	1
UBE2C	1922	-	CHG	TTCTG	NA	0	0	1
UBE2C	1925	-	CHH	TCCTT	NA	0	0	1
UBE2C	1926	-	CHH	CTCCT	NA	0	0	1
UBE2C	1928	-	CHH	CCCTC	NA	0	0	1
UBE2C	1929	-	CHH	CCCCT	NA	0	0	1
UBE2C	1930	-	CHH	ACCCC	NA	0	0	1
UBE2C	1931	-	CHH	AACCC	NA	0	0	1
UBE2C	1934	+	CHH	TTCAT	NA	0	0	1
UBE2C	1937	+	CHH	ATCCC	NA	0	0	1
UBE2C	1938	+	CHH	TCCCA	NA	0	0	1
UBE2C	1939	+	CHH	CCCAC	NA	0	0	1
UBE2C	1941	+	CG	CACGT	NA	0	0	1
UBE2C	1942	-	CG	CACGT	NA	0	0	1
UBE2C	1944	-	CHH	TCCAC	NA	0	0	1
UBE2C	1945	-	CHH	GTCCA	NA	0	0	1
UBE2C	1947	+	CG	GACGT	NA	0	0	1
UBE2C	1948	-	CG	AACGT	NA	0	0	1
UBE2C	1953	+	CHH	TTCTT	NA	0	0	1
UBE2C	1956	-	CHH	GCCAA	NA	0	0	1
UBE2C	1957	-	CHH	GGCCA	NA	0	0	1
UBE2C	1958	+	CHH	GGCCC	NA	0	0	1
UBE2C	1959	+	CHH	GCCCT	NA	0	0	1
UBE2C	1960	+	CHH	CCCTT	NA	0	0	1
UBE2C	1967	-	CHH	ACCAT	NA	0	0	1
UBE2C	1968	-	CHH	AACCA	NA	0	0	1
UBE2C	1972	-	CHH	CGCTA	NA	0	0	1
UBE2C	1973	+	CG	AGCGT	NA	0	0	1
UBE2C	1974	-	CG	AACGC	NA	0	0	1
UBE2C	1979	+	CHH	TTCCA	NA	0	0	1
UBE2C	1980	+	CHH	TCCAA	NA	0	0	1
UBE2C	1983	+	CG	AACGG	NA	0	0	1
UBE2C	1984	-	CG	GCCGT	NA	0	0	1
UBE2C	1985	-	CHG	GGCCG	NA	0	0	1
UBE2C	1986	+	CHH	GGCCA	NA	0	0	1
UBE2C	1987	+	CHH	GCCAC	NA	0	0	1
UBE2C	1989	+	CHH	CACCA	NA	0	0	1
UBE2C	1990	+	CHH	ACCAA	NA	0	0	1
UBE2C	1995	+	CG	TTCGC	NA	0	0	1
UBE2C	1996	-	CG	AGCGA	NA	0	0	1
UBE2C	1997	+	CHH	CGCTA	NA	0	0	1
UBE2C	2000	+	CG	TACGG	NA	0	0	1
UBE2C	2001	-	CG	TCCGT	NA	0	0	1
UBE2C	2002	-	CHG	ATCCG	NA	0	0	1
UBE2C	2006	+	CG	TTCGT	NA	0	0	1
UBE2C	2007	-	CG	AACGA	NA	0	0	1
UBE2C	2011	-	CHH	AACTA	NA	0	0	1
UBE2C	2017	-	CHH	GCCAT	NA	0	0	1
UBE2C	2018	-	CHH	TGCCA	NA	0	0	1
UBE2C	2019	+	CHG	GGCAG	NA	0	0	1
UBE2C	2021	-	CHG	TGCTG	NA	0	0	1
UBE2C	2022	+	CHH	AGCAT	NA	0	0	1
UBE2C	2025	+	CHH	ATCAT	NA	0	0	1
UBE2C	2028	+	CHH	ATCTA	NA	0	0	1
UBE2C	2031	+	CHH	TACCA	NA	0	0	1
UBE2C	2032	+	CHH	ACCAA	NA	0	0	1
UBE2C	2036	+	CG	ATCGG	NA	0	0	1
UBE2C	2037	-	CG	ACCGA	NA	0	0	1
UBE2C	2038	-	CHG	AACCG	NA	0	0	1
UBE2C	2041	-	CHH	GACAA	NA	0	0	1
UBE2C	2043	+	CHG	GTCAG	NA	0	0	1
UBE2C	2045	-	CHG	TTCTG	NA	0	0	1
UBE2C	2048	-	CHH	CGCTT	NA	0	0	1
UBE2C	2049	+	CG	AGCGG	NA	0	0	1
UBE2C	2050	-	CG	CCCGC	NA	0	0	1
UBE2C	2051	-	CHG	TCCCG	NA	0	0	1
UBE2C	2052	-	CHH	ATCCC	NA	0	0	1
UBE2C	2056	+	CHG	TTCTG	NA	0	0	1
UBE2C	2058	-	CHG	GGCAG	NA	0	0	1
UBE2C	2059	+	CHG	TGCCG	NA	0	0	1
UBE2C	2060	+	CG	GCCGC	NA	0	0	1
UBE2C	2061	-	CG	GGCGG	NA	0	0	1
UBE2C	2062	+	CHH	CGCCC	NA	0	0	1
UBE2C	2063	+	CHH	GCCCA	NA	0	0	1
UBE2C	2064	+	CHH	CCCAA	NA	0	0	1
UBE2C	2069	-	CHH	CGCTA	NA	0	0	1
UBE2C	2070	+	CG	AGCGG	NA	0	0	1
UBE2C	2071	-	CG	ACCGC	NA	0	0	1
UBE2C	2072	-	CHG	CACCG	NA	0	0	1
UBE2C	2074	-	CHH	CGCAC	NA	0	0	1
UBE2C	2075	+	CG	TGCGC	NA	0	0	1
UBE2C	2076	-	CG	GGCGC	NA	0	0	1
UBE2C	2077	+	CHH	CGCCA	NA	0	0	1
UBE2C	2078	+	CHG	GCCAG	NA	0	0	1
UBE2C	2080	-	CHG	CACTG	NA	0	0	1
UBE2C	2082	-	CHH	CCCAC	NA	0	0	1
UBE2C	2083	-	CHH	ACCCA	NA	0	0	1
UBE2C	2084	-	CHH	TACCC	NA	0	0	1
UBE2C	2087	-	CHH	ACCTA	NA	0	0	1
UBE2C	2088	-	CHH	GACCT	NA	0	0	1
UBE2C	2090	+	CHH	GTCTA	NA	0	0	1
UBE2C	2093	-	CHH	TGCTA	NA	0	0	1
UBE2C	2094	+	CHG	AGCAG	NA	0	0	1
UBE2C	2096	-	CHG	CACTG	NA	0	0	1
UBE2C	2098	-	CHH	GCCAC	NA	0	0	1
UBE2C	2099	-	CHH	CGCCA	NA	0	0	1
UBE2C	2100	+	CG	GGCGC	NA	0	0	1
UBE2C	2101	-	CG	TGCGC	NA	0	0	1
UBE2C	2102	+	CHG	CGCAG	NA	0	0	1
UBE2C	2104	-	CHG	TGCTG	NA	0	0	1
UBE2C	2105	+	CHH	AGCAA	NA	0	0	1
UBE2C	2110	-	CHH	CTCTA	NA	0	0	1
UBE2C	2112	-	CHH	CGCTC	NA	0	0	1
UBE2C	2113	+	CG	AGCGC	NA	0	0	1
UBE2C	2114	-	CG	AGCGC	NA	0	0	1
UBE2C	2115	+	CHH	CGCTC	NA	0	0	1
UBE2C	2117	+	CHG	CTCCG	NA	0	0	1
UBE2C	2118	+	CG	TCCGG	NA	0	0	1
UBE2C	2119	-	CG	TCCGG	NA	0	0	1
UBE2C	2120	-	CHG	CTCCG	NA	0	0	1
UBE2C	2122	-	CHH	CGCTC	NA	0	0	1
UBE2C	2123	+	CG	AGCGT	NA	0	0	1
UBE2C	2124	-	CG	GACGC	NA	0	0	1
UBE2C	2126	+	CHH	GTCTC	NA	0	0	1
UBE2C	2128	+	CHH	CTCAT	NA	0	0	1
UBE2C	2132	-	CHH	GCCAA	NA	0	0	1
UBE2C	2133	-	CHH	AGCCA	NA	0	0	1
UBE2C	2134	+	CHG	GGCTG	0.001	104	118299	1
UBE2C	2136	-	CHG	TCCAG	NA	0	0	1
UBE2C	2137	-	CHH	ATCCA	NA	0	0	1
UBE2C	2140	+	CHH	ATCAA	0	49	120204	1
UBE2C	2144	+	CHH	AACCC	0	48	119254	1
UBE2C	2145	+	CHH	ACCCA	0.001	73	120290	1
UBE2C	2146	+	CHH	CCCAA	0	33	120294	1
UBE2C	2149	-	CHH	CGCTT	NA	0	0	1
UBE2C	2150	+	CG	AGCGA	0.298	35692	84258	0
UBE2C	2151	-	CG	CTCGC	NA	0	0	1
UBE2C	2153	-	CHH	GGCTC	NA	0	0	1
UBE2C	2154	+	CHH	AGCCA	0.001	91	120154	1
UBE2C	2155	+	CHH	GCCAT	0	49	120317	1
UBE2C	2159	-	CHH	ATCAA	NA	0	0	1
UBE2C	2163	-	CHH	ACCAA	NA	0	0	1
UBE2C	2164	-	CHH	GACCA	NA	0	0	1
UBE2C	2166	+	CG	GTCGA	0.006	683	119613	1
UBE2C	2167	-	CG	GTCGA	NA	0	0	1
UBE2C	2169	+	CG	GACGC	0.005	609	119527	1
UBE2C	2170	-	CG	GGCGT	NA	0	0	1
UBE2C	2171	+	CHH	CGCCC	0.005	652	119554	1
UBE2C	2172	+	CHH	GCCCC	0.006	708	119508	1
UBE2C	2173	+	CHH	CCCCC	0.005	637	119585	1
UBE2C	2174	+	CHH	CCCCA	0.004	463	119723	1
UBE2C	2175	+	CHG	CCCAG	0.007	806	119391	1
UBE2C	2177	-	CHG	CTCTG	NA	0	0	1
UBE2C	2179	-	CHH	CCCTC	NA	0	0	1
UBE2C	2180	-	CHH	ACCCT	NA	0	0	1
UBE2C	2181	-	CHH	AACCC	NA	0	0	1
UBE2C	2185	+	CHH	TACAA	0.007	833	119212	1
UBE2C	2190	+	CHH	TTCAA	0.002	283	119761	1
UBE2C	2194	+	CG	AACGC	0.009	1082	118910	1
UBE2C	2195	-	CG	CGCGT	NA	0	0	1
UBE2C	2196	+	CG	CGCGG	0.008	958	118929	1
UBE2C	2197	-	CG	CCCGC	NA	0	0	1
UBE2C	2198	-	CHG	GCCCG	NA	0	0	1
UBE2C	2199	-	CHH	CGCCC	NA	0	0	1
UBE2C	2200	+	CG	GGCGG	0.005	550	119250	1
UBE2C	2201	-	CG	CCCGC	NA	0	0	1
UBE2C	2202	-	CHG	GCCCG	NA	0	0	1
UBE2C	2203	-	CHH	CGCCC	NA	0	0	1
UBE2C	2204	+	CG	GGCGG	0.004	421	119350	1
UBE2C	2205	-	CG	CCCGC	NA	0	0	1
UBE2C	2206	-	CHG	GCCCG	NA	0	0	1
UBE2C	2207	-	CHH	GGCCC	NA	0	0	1
UBE2C	2208	+	CHH	GGCCC	0.007	880	118611	1
UBE2C	2209	+	CHG	GCCCG	0.005	558	118750	1
UBE2C	2210	+	CG	CCCGC	0.008	956	118651	1
UBE2C	2211	-	CG	TGCGG	NA	0	0	1
UBE2C	2212	+	CHG	CGCAG	0.006	711	118847	1
UBE2C	2214	-	CHG	GACTG	NA	0	0	1
UBE2C	2216	+	CHH	GTCCT	0.007	891	118521	1
UBE2C	2217	+	CHG	TCCTG	0.004	421	119072	1
UBE2C	2219	-	CHG	TGCAG	NA	0	0	1
UBE2C	2220	+	CHG	TGCAG	0.007	882	118641	1
UBE2C	2222	-	CHG	AACTG	NA	0	0	1
UBE2C	2225	-	CHH	TGCAA	NA	0	0	1
UBE2C	2226	+	CHG	TGCAG	0.003	400	118983	1
UBE2C	2228	-	CHG	GACTG	NA	0	0	1
UBE2C	2230	+	CG	GTCGT	0.007	867	118348	1
UBE2C	2231	-	CG	CACGA	NA	0	0	1
UBE2C	2233	-	CHH	AACAC	NA	0	0	1
UBE2C	2236	+	CHH	TTCTC	0.006	671	118419	1
UBE2C	2238	+	CHG	CTCCG	0.003	409	118564	1
UBE2C	2239	+	CG	TCCGA	0.008	927	118174	1
UBE2C	2240	-	CG	CTCGG	NA	0	0	1
UBE2C	2242	-	CHH	AACTC	NA	0	0	1
UBE2C	2245	+	CHH	TTCCT	0.005	659	121559	1
UBE2C	2246	+	CHG	TCCTG	0.006	769	120788	1
UBE2C	2248	-	CHG	GACAG	NA	0	0	1
UBE2C	2250	+	CHH	GTCTC	0.007	819	121443	1
UBE2C	2252	+	CHH	CTCTC	0.004	474	121811	1
UBE2C	2254	+	CHG	CTCTG	0.004	536	120862	1
UBE2C	2256	-	CHG	GGCAG	NA	0	0	1
UBE2C	2257	+	CHH	TGCCA	0.004	513	121751	1
UBE2C	2258	+	CHH	GCCAA	0.006	747	121025	1
UBE2C	2261	+	CG	AACGC	0.006	677	121716	1
UBE2C	2262	-	CG	GGCGT	NA	0	0	1
UBE2C	2263	+	CHG	CGCCG	0.007	868	120625	1
UBE2C	2264	+	CG	GCCGC	0.007	870	121508	1
UBE2C	2265	-	CG	GGCGG	NA	0	0	1
UBE2C	2266	+	CHH	CGCCC	0.005	573	121705	1
UBE2C	2267	+	CHG	GCCCG	0.004	473	121558	1
UBE2C	2268	+	CG	CCCGG	0.004	487	121522	1
UBE2C	2269	-	CG	TCCGG	NA	0	0	1
UBE2C	2270	-	CHG	ATCCG	NA	0	0	1
UBE2C	2273	-	CHH	GCCAT	NA	0	0	1
UBE2C	2274	-	CHH	AGCCA	NA	0	0	1
UBE2C	2275	+	CHH	GGCTT	0.005	670	121765	1
UBE2C	2278	+	CHH	TTCCC	0.005	584	118044	1
UBE2C	2279	+	CHH	TCCCA	0.003	400	118167	1
UBE2C	2280	+	CHH	CCCAA	0.009	1099	117417	1
UBE2C	2285	+	CHG	AACCG	0.003	298	118236	1
UBE2C	2286	+	CG	ACCGC	0.005	598	118202	1
UBE2C	2287	-	CG	CGCGG	NA	0	0	1
UBE2C	2288	+	CG	CGCGA	0.006	668	118118	1
UBE2C	2289	-	CG	GTCGC	NA	0	0	1
UBE2C	2291	+	CHH	GACCC	0.004	461	118411	1
UBE2C	2292	+	CHH	ACCCA	0.005	635	118167	1
UBE2C	2293	+	CHG	CCCAG	0.006	668	117847	1
UBE2C	2295	-	CHG	GGCTG	NA	0	0	1
UBE2C	2296	+	CHG	AGCCG	0.003	358	118477	1
UBE2C	2297	+	CG	GCCGC	0.007	818	118047	1
UBE2C	2298	-	CG	GGCGG	NA	0	0	1
UBE2C	2299	+	CHH	CGCCA	0.006	711	118185	1
UBE2C	2300	+	CHH	GCCAC	0.007	869	118001	1
UBE2C	2302	+	CHH	CACTA	0.005	599	118284	1
UBE2C	2305	-	CHH	CGCTA	NA	0	0	1
UBE2C	2306	+	CG	AGCGT	0.005	624	118335	1
UBE2C	2307	-	CG	GACGC	NA	0	0	1
UBE2C	2309	+	CG	GTCGC	0.005	574	118510	1
UBE2C	2310	-	CG	GGCGA	NA	0	0	1
UBE2C	2311	+	CHG	CGCCG	0.004	531	118477	1
UBE2C	2312	+	CG	GCCGC	0.007	814	118241	1
UBE2C	2313	-	CG	GGCGG	NA	0	0	1
UBE2C	2314	+	CHG	CGCCG	0.005	541	118353	1
UBE2C	2315	+	CG	GCCGC	0.005	648	118506	1
UBE2C	2316	-	CG	GGCGG	NA	0	0	1
UBE2C	2317	+	CHH	CGCCC	0.004	419	118698	1
UBE2C	2318	+	CHG	GCCCG	0.005	630	118453	1
UBE2C	2319	+	CG	CCCGT	0.007	842	118249	1
UBE2C	2320	-	CG	TACGG	NA	0	0	1
UBE2C	2325	-	CHH	TCCTT	NA	0	0	1
UBE2C	2326	-	CHH	CTCCT	NA	0	0	1
UBE2C	2328	-	CHH	AGCTC	NA	0	0	1
UBE2C	2329	+	CHG	AGCTG	0.005	599	118634	1
UBE2C	2331	-	CHG	CTCAG	NA	0	0	1
UBE2C	2333	-	CHH	GGCTC	NA	0	0	1
UBE2C	2334	+	CHG	AGCCG	0.004	455	118585	1
UBE2C	2335	+	CG	GCCGA	0.008	984	118162	1
UBE2C	2336	-	CG	CTCGG	NA	0	0	1
UBE2C	2338	-	CHH	CGCTC	NA	0	0	1
UBE2C	2339	+	CG	AGCGG	0.006	750	117210	1
UBE2C	2340	-	CG	CCCGC	NA	0	0	1
UBE2C	2341	-	CHG	CCCCG	NA	0	0	1
UBE2C	2342	-	CHH	CCCCC	NA	0	0	1
UBE2C	2343	-	CHH	GCCCC	NA	0	0	1
UBE2C	2344	-	CHH	CGCCC	NA	0	0	1
UBE2C	2345	+	CG	GGCGC	0.011	1297	118127	1
UBE2C	2346	-	CG	GGCGC	NA	0	0	1
UBE2C	2347	+	CHG	CGCCG	0.007	809	118738	1
UBE2C	2348	+	CG	GCCGC	0.007	893	118792	1
UBE2C	2349	-	CG	GGCGG	NA	0	0	1
UBE2C	2350	+	CHH	CGCCC	0.006	737	118910	1
UBE2C	2351	+	CHG	GCCCG	0.005	603	119111	1
UBE2C	2352	+	CG	CCCGG	0.008	1002	118661	1
UBE2C	2353	-	CG	CCCGG	NA	0	0	1
UBE2C	2354	-	CHG	CCCCG	NA	0	0	1
UBE2C	2355	-	CHH	ACCCC	NA	0	0	1
UBE2C	2356	-	CHH	GACCC	NA	0	0	1
UBE2C	2358	+	CHG	GTCCG	0.005	652	119052	1
UBE2C	2359	+	CG	TCCGG	0.009	1045	118601	1
UBE2C	2360	-	CG	ACCGG	NA	0	0	1
UBE2C	2361	-	CHG	CACCG	NA	0	0	1
UBE2C	2363	-	CHH	CCCAC	NA	0	0	1
UBE2C	2364	-	CHH	GCCCA	NA	0	0	1
UBE2C	2365	-	CHH	TGCCC	NA	0	0	1
UBE2C	2366	+	CHH	GGCAA	0.002	223	119503	1
UBE2C	2371	-	CHH	ACCTT	NA	0	0	1
UBE2C	2372	-	CHH	CACCT	NA	0	0	1
UBE2C	2374	-	CHH	CTCAC	NA	0	0	1
UBE2C	2376	-	CHH	CACTC	NA	0	0	1
UBE2C	2378	-	CHH	ATCAC	NA	0	0	1
UBE2C	2381	-	CHH	CGCAT	NA	0	0	1
UBE2C	2382	+	CG	TGCGG	0.235	27961	90924	3.70751e-88
UBE2C	2383	-	CG	GCCGC	NA	0	0	1
UBE2C	2384	-	CHG	GGCCG	NA	0	0	1
UBE2C	2385	+	CHH	GGCCT	0	0	77	1
UBE2C	2386	+	CHH	GCCTA	0	0	13	1
UBE2C	2389	+	CHH	TACCA	NA	0	0	1
UBE2C	2390	+	CHH	ACCAC	NA	0	0	1
UBE2C	2392	+	CHH	CACTC	NA	0	0	1
UBE2C	2394	+	CG	CTCGC	NA	0	0	1
UBE2C	2395	-	CG	GGCGA	NA	0	0	1
UBE2C	2396	+	CHG	CGCCG	NA	0	0	1
UBE2C	2397	+	CG	GCCGG	NA	0	0	1
UBE2C	2398	-	CG	CCCGG	NA	0	0	1
UBE2C	2399	-	CHG	GCCCG	NA	0	0	1
UBE2C	2400	-	CHH	GGCCC	NA	0	0	1
UBE2C	2401	+	CHH	GGCCT	NA	0	0	1
UBE2C	2402	+	CHG	GCCTG	NA	0	0	1
UBE2C	2404	-	CHG	GGCAG	NA	0	0	1
UBE2C	2405	+	CHH	TGCCA	NA	0	0	1
UBE2C	2406	+	CHH	GCCAT	NA	0	0	1
UBE2C	2409	-	CHH	GGCAT	NA	0	0	1
UBE2C	2410	+	CHH	TGCCC	NA	0	0	1
UBE2C	2411	+	CHH	GCCCT	NA	0	0	1
UBE2C	2412	+	CHH	CCCTA	NA	0	0	1
UBE2C	2415	-	CHH	GCCTA	NA	0	0	1
UBE2C	2416	-	CHH	TGCCT	NA	0	0	1
UBE2C	2417	+	CHH	GGCAT	NA	0	0	1
UBE2C	2421	-	CHH	ACCAA	NA	0	0	1
UBE2C	2422	-	CHH	TACCA	NA	0	0	1
UBE2C	2425	+	CHH	TACCC	NA	0	0	1
UBE2C	2426	+	CHH	ACCCA	NA	0	0	1
UBE2C	2427	+	CHG	CCCAG	0	0	18	1
UBE2C	2429	-	CHG	CTCTG	NA	0	0	1
UBE2C	2431	-	CHH	TGCTC	NA	0	0	1
UBE2C	2432	+	CHH	AGCAA	0.001	54	100940	1
UBE2C	2436	-	CHH	ATCTT	NA	0	0	1
UBE2C	2441	+	CHH	TTCTA	0	34	101765	1
UBE2C	2444	-	CHH	TCCTA	NA	0	0	1
UBE2C	2445	-	CHH	GTCCT	NA	0	0	1
UBE2C	2447	+	CHH	GACCA	0.001	77	101638	1
UBE2C	2448	+	CHH	ACCAC	0	43	101773	1
UBE2C	2450	+	CHH	CACCC	0.001	75	101729	1
UBE2C	2451	+	CHH	ACCCC	0.001	69	101737	1
UBE2C	2452	+	CHH	CCCCC	0.001	70	101736	1
UBE2C	2453	+	CHH	CCCCC	0.001	78	101721	1
UBE2C	2454	+	CHG	CCCCG	0.001	56	101756	1
UBE2C	2455	+	CG	CCCGC	0.542	55180	46589	0
UBE2C	2456	-	CG	GGCGG	NA	0	0	1
UBE2C	2457	+	CHG	CGCCG	0.001	84	101664	1
UBE2C	2458	+	CG	GCCGC	0.508	51680	50023	0
UBE2C	2459	-	CG	GGCGG	NA	0	0	1
UBE2C	2460	+	CHH	CGCCA	0.001	103	101656	1
UBE2C	2461	+	CHH	GCCAC	0.001	83	101601	1
UBE2C	2463	+	CHH	CACCT	0.001	62	101631	1
UBE2C	2464	+	CHH	ACCTC	0.001	71	101675	1
UBE2C	2466	+	CHH	CTCCT	0	40	101697	1
UBE2C	2467	+	CHG	TCCTG	0.004	436	101239	1
UBE2C	2469	-	CHG	TCCAG	NA	0	0	1
UBE2C	2470	-	CHH	CTCCA	NA	0	0	1
UBE2C	2472	-	CHH	CGCTC	NA	0	0	1
UBE2C	2473	+	CG	AGCGG	0.004	434	100860	1
UBE2C	2474	-	CG	CCCGC	NA	0	0	1
UBE2C	2475	-	CHG	TCCCG	NA	0	0	1
UBE2C	2476	-	CHH	CTCCC	NA	0	0	1
UBE2C	2478	-	CHH	ATCTC	NA	0	0	1
UBE2C	2481	+	CHG	ATCTG	0.004	437	100714	1
UBE2C	2483	-	CHG	CGCAG	NA	0	0	1
UBE2C	2484	+	CG	TGCGG	0.004	416	100706	1
UBE2C	2485	-	CG	CCCGC	NA	0	0	1
UBE2C	2486	-	CHG	ACCCG	NA	0	0	1
UBE2C	2487	-	CHH	CACCC	NA	0	0	1
UBE2C	2489	-	CHH	TGCAC	NA	0	0	1
UBE2C	2490	+	CHG	TGCAG	0.006	586	100195	1
UBE2C	2492	-	CHG	TCCTG	NA	0	0	1
UBE2C	2493	-	CHH	CTCCT	NA	0	0	1
UBE2C	2495	-	CHH	TTCTC	NA	0	0	1
UBE2C	2498	+	CHH	AACAC	0.005	512	100198	1
UBE2C	2500	+	CHH	CACAC	0.004	390	100316	1
UBE2C	2502	+	CHH	CACCA	0.006	648	99994	1
UBE2C	2503	+	CHG	ACCAG	0.009	920	99821	1
UBE2C	2505	-	CHG	TCCTG	NA	0	0	1
UBE2C	2506	-	CHH	CTCCT	NA	0	0	1
UBE2C	2508	-	CHH	AGCTC	NA	0	0	1
UBE2C	2509	+	CHH	AGCTC	0.004	457	102941	1
UBE2C	2511	+	CG	CTCGG	0.007	683	104128	1
UBE2C	2512	-	CG	CCCGA	NA	0	0	1
UBE2C	2513	-	CHG	CCCCG	NA	0	0	1
UBE2C	2514	-	CHH	GCCCC	NA	0	0	1
UBE2C	2515	-	CHH	GGCCC	NA	0	0	1
UBE2C	2516	+	CHH	GGCCT	0.008	814	102653	1
UBE2C	2517	+	CHG	GCCTG	0.003	329	104940	1
UBE2C	2519	-	CHG	GCCAG	NA	0	0	1
UBE2C	2520	-	CHH	TGCCA	NA	0	0	1
UBE2C	2521	+	CHH	GGCAT	0.003	359	102928	1
UBE2C	2525	+	CHH	TTCCC	0.005	514	104865	1
UBE2C	2526	+	CHH	TCCCC	0.005	532	104812	1
UBE2C	2527	+	CHH	CCCCT	0.003	364	104907	1
UBE2C	2528	+	CHG	CCCTG	0.004	389	104354	1
UBE2C	2530	-	CHG	CCCAG	NA	0	0	1
UBE2C	2531	-	CHH	GCCCA	NA	0	0	1
UBE2C	2532	-	CHH	TGCCC	NA	0	0	1
UBE2C	2533	+	CHH	GGCAT	0.005	555	104542	1
UBE2C	2536	-	CHH	CCCAT	NA	0	0	1
UBE2C	2537	-	CHH	ACCCA	NA	0	0	1
UBE2C	2538	-	CHH	CACCC	NA	0	0	1
UBE2C	2540	-	CHH	GACAC	NA	0	0	1
UBE2C	2542	+	CG	GTCGA	0.007	778	104581	1
UBE2C	2543	-	CG	CTCGA	NA	0	0	1
UBE2C	2545	-	CHH	CCCTC	NA	0	0	1
UBE2C	2546	-	CHH	GCCCT	NA	0	0	1
UBE2C	2547	-	CHH	CGCCC	NA	0	0	1
UBE2C	2548	+	CG	GGCGG	0.005	493	104939	1
UBE2C	2549	-	CG	TCCGC	NA	0	0	1
UBE2C	2550	-	CHG	CTCCG	NA	0	0	1
UBE2C	2552	-	CHH	GTCTC	NA	0	0	1
UBE2C	2554	+	CHH	GACTT	0.004	464	105120	1
UBE2C	2557	+	CHG	TTCCG	0.004	380	105020	1
UBE2C	2558	+	CG	TCCGG	0.006	656	104639	1
UBE2C	2559	-	CG	CCCGG	NA	0	0	1
UBE2C	2560	-	CHG	TCCCG	NA	0	0	1
UBE2C	2561	-	CHH	GTCCC	NA	0	0	1
UBE2C	2563	+	CHH	GACTC	0.004	464	105083	1
UBE2C	2565	+	CHH	CTCCC	0.006	655	104855	1
UBE2C	2566	+	CHH	TCCCA	0.003	368	105124	1
UBE2C	2567	+	CHH	CCCAC	0.006	665	104644	1
UBE2C	2569	+	CHH	CACCT	0.004	440	105054	1
UBE2C	2570	+	CHH	ACCTC	0.004	392	105142	1
UBE2C	2572	+	CHH	CTCCT	0.008	792	102098	1
UBE2C	2573	+	CHH	TCCTT	0.004	409	102444	1
UBE2C	2576	-	CHH	CGCAA	NA	0	0	1
UBE2C	2577	+	CG	TGCGC	0.007	715	102142	1
UBE2C	2578	-	CG	CGCGC	NA	0	0	1
UBE2C	2579	+	CG	CGCGG	0.007	681	102026	1
UBE2C	2580	-	CG	CCCGC	NA	0	0	1
UBE2C	2581	-	CHG	ACCCG	NA	0	0	1
UBE2C	2582	-	CHH	CACCC	NA	0	0	1
UBE2C	2584	-	CHH	CTCAC	NA	0	0	1
UBE2C	2586	-	CHH	ATCTC	NA	0	0	1
UBE2C	2590	+	CG	TTCGA	0.006	587	102387	1
UBE2C	2591	-	CG	CTCGA	NA	0	0	1
UBE2C	2593	-	CHH	CTCTC	NA	0	0	1
UBE2C	2595	-	CHH	ATCTC	NA	0	0	1
UBE2C	2598	-	CHH	CCCAT	NA	0	0	1
UBE2C	2599	-	CHH	CCCCA	NA	0	0	1
UBE2C	2600	-	CHH	CCCCC	NA	0	0	1
UBE2C	2601	-	CHH	TCCCC	NA	0	0	1
UBE2C	2602	-	CHH	GTCCC	NA	0	0	1
UBE2C	2604	+	CHG	GACAG	0.008	780	101408	1
UBE2C	2606	-	CHG	GCCTG	NA	0	0	1
UBE2C	2607	-	CHH	GGCCT	NA	0	0	1
UBE2C	2608	+	CHH	GGCCA	0.008	797	102381	1
UBE2C	2609	+	CHG	GCCAG	0.005	467	102616	1
UBE2C	2611	-	CHG	TCCTG	NA	0	0	1
UBE2C	2612	-	CHH	CTCCT	NA	0	0	1
UBE2C	2614	-	CHH	AGCTC	NA	0	0	1
UBE2C	2615	+	CHH	AGCTC	0.007	681	102620	1
UBE2C	2617	+	CHG	CTCAG	0.006	592	102678	1
UBE2C	2619	-	CHG	GTCTG	NA	0	0	1
UBE2C	2621	+	CHG	GACCG	0.006	610	102720	1
UBE2C	2622	+	CG	ACCGC	0.006	660	102662	1
UBE2C	2623	-	CG	AGCGG	NA	0	0	1
UBE2C	2624	+	CHH	CGCTC	0.003	337	102885	1
UBE2C	2626	+	CHH	CTCTT	0.003	339	102999	1
UBE2C	2630	-	CHH	CTCAA	NA	0	0	1
UBE2C	2632	-	CHH	GTCTC	NA	0	0	1
UBE2C	2634	+	CHH	GACTC	0.003	285	103022	1
UBE2C	2636	+	CHH	CTCTC	0.003	305	103035	1
UBE2C	2638	+	CHH	CTCCC	0.003	281	103051	1
UBE2C	2639	+	CHG	TCCCG	0.005	485	102819	1
UBE2C	2640	+	CG	CCCGA	0.126	12781	88863	1.93226e-20
UBE2C	2641	-	CG	TTCGG	NA	0	0	1
UBE2C	2644	-	CHH	TCCTT	NA	0	0	1
UBE2C	2645	-	CHH	CTCCT	NA	0	0	1
UBE2C	2647	-	CHH	TTCTC	NA	0	0	1
UBE2C	2651	-	CHH	CCCAT	NA	0	0	1
UBE2C	2652	-	CHH	TCCCA	NA	0	0	1
UBE2C	2653	-	CHH	CTCCC	NA	0	0	1
UBE2C	2655	-	CHH	CCCTC	NA	0	0	1
UBE2C	2656	-	CHH	ACCCT	NA	0	0	1
UBE2C	2657	-	CHH	TACCC	NA	0	0	1
UBE2C	2660	-	CHH	CCCTA	NA	0	0	1
UBE2C	2661	-	CHH	CCCCT	NA	0	0	1
UBE2C	2662	-	CHH	GCCCC	NA	0	0	1
UBE2C	2663	-	CHH	CGCCC	NA	0	0	1
UBE2C	2664	+	CG	GGCGC	NA	0	0	1
UBE2C	2665	-	CG	AGCGC	NA	0	0	1
UBE2C	2666	+	CHG	CGCTG	NA	0	0	1
UBE2C	2668	-	CHG	GGCAG	NA	0	0	1
UBE2C	2669	+	CHH	TGCCA	NA	0	0	1
UBE2C	2670	+	CHG	GCCAG	NA	0	0	1
UBE2C	2672	-	CHG	GTCTG	NA	0	0	1
UBE2C	2674	+	CHH	GACTC	NA	0	0	1
UBE2C	2676	+	CHH	CTCCT	NA	0	0	1
UBE2C	2677	+	CHH	TCCTT	NA	0	0	1
UBE2C	2680	+	CHH	TTCCC	NA	0	0	1
UBE2C	2681	+	CHH	TCCCT	NA	0	0	1
UBE2C	2682	+	CHG	CCCTG	NA	0	0	1
UBE2C	2684	-	CHG	ACCAG	NA	0	0	1
UBE2C	2685	-	CHH	CACCA	NA	0	0	1
UBE2C	2687	-	CHH	CCCAC	NA	0	0	1
UBE2C	2688	-	CHH	GCCCA	NA	0	0	1
UBE2C	2689	-	CHH	GGCCC	NA	0	0	1
UBE2C	2690	+	CHH	GGCCT	NA	0	0	1
UBE2C	2691	+	CHH	GCCTA	NA	0	0	1
UBE2C	2694	-	CHH	ATCTA	NA	0	0	1
UBE2C	2697	-	CHH	TTCAT	NA	0	0	1
UBE2C	2700	-	CHH	GTCTT	NA	0	0	1
UBE2C	2702	+	CG	GACGC	NA	0	0	1
UBE2C	2703	-	CG	AGCGT	NA	0	0	1
UBE2C	2704	+	CHH	CGCTC	NA	0	0	1
UBE2C	2706	+	CHH	CTCAA	NA	0	0	1
UBE2C	2709	-	CHH	TCCTT	NA	0	0	1
UBE2C	2710	-	CHH	GTCCT	NA	0	0	1
UBE2C	2712	+	CHH	GACCC	NA	0	0	1
UBE2C	2713	+	CHH	ACCCT	NA	0	0	1
UBE2C	2714	+	CHH	CCCTC	NA	0	0	1
UBE2C	2716	+	CG	CTCGT	NA	0	0	1
UBE2C	2717	-	CG	CACGA	NA	0	0	1
UBE2C	2719	-	CHH	GTCAC	NA	0	0	1
UBE2C	2721	+	CHH	GACTT	NA	0	0	1
UBE2C	2724	-	CHH	GCCAA	NA	0	0	1
UBE2C	2725	-	CHH	GGCCA	NA	0	0	1
UBE2C	2726	+	CHG	GGCCG	NA	0	0	1
UBE2C	2727	+	CG	GCCGA	NA	0	0	1
UBE2C	2728	-	CG	CTCGG	NA	0	0	1
UBE2C	2730	-	CHH	GTCTC	NA	0	0	1
UBE2C	2732	+	CHG	GACAG	NA	0	0	1
UBE2C	2734	-	CHG	CCCTG	NA	0	0	1
UBE2C	2735	-	CHH	CCCCT	NA	0	0	1
UBE2C	2736	-	CHH	TCCCC	NA	0	0	1
UBE2C	2737	-	CHH	TTCCC	NA	0	0	1
UBE2C	2740	-	CHH	CCCTT	NA	0	0	1
UBE2C	2741	-	CHH	TCCCT	NA	0	0	1
UBE2C	2742	-	CHH	CTCCC	NA	0	0	1
UBE2C	2744	-	CHH	TTCTC	NA	0	0	1
UBE2C	2747	-	CHH	AACTT	NA	0	0	1
UBE2C	2750	-	CHH	CTCAA	NA	0	0	1
UBE2C	2752	-	CHH	GACTC	NA	0	0	1
UBE2C	2754	+	CG	GTCGG	NA	0	0	1
UBE2C	2755	-	CG	CCCGA	NA	0	0	1
UBE2C	2756	-	CHG	GCCCG	NA	0	0	1
UBE2C	2757	-	CHH	TGCCC	NA	0	0	1
UBE2C	2758	+	CHH	GGCAA	NA	0	0	1
UBE2C	2761	-	CHH	TCCTT	NA	0	0	1
UBE2C	2762	-	CHH	TTCCT	NA	0	0	1
UBE2C	2765	-	CHH	CTCTT	NA	0	0	1
UBE2C	2767	-	CHH	ATCTC	NA	0	0	1
UBE2C	2770	-	CHH	AGCAT	NA	0	0	1
UBE2C	2771	+	CHH	TGCTA	NA	0	0	1
UBE2C	2776	-	CHH	GGCTT	NA	0	0	1
UBE2C	2777	+	CHH	AGCCT	NA	0	0	1
UBE2C	2778	+	CHG	GCCTG	NA	0	0	1
UBE2C	2780	-	CHG	CCCAG	NA	0	0	1
UBE2C	2781	-	CHH	CCCCA	NA	0	0	1
UBE2C	2782	-	CHH	TCCCC	NA	0	0	1
UBE2C	2783	-	CHH	TTCCC	NA	0	0	1
UBE2C	2790	-	CHH	TTCTT	NA	0	0	1
UBE2C	2793	+	CHH	AACAT	NA	0	0	1
UBE2C	2796	-	CHH	GGCAT	NA	0	0	1
UBE2C	2797	+	CHH	TGCCA	NA	0	0	1
UBE2C	2798	+	CHG	GCCAG	NA	0	0	1
UBE2C	2800	-	CHG	TTCTG	NA	0	0	1
UBE2C	2804	+	CHH	ATCAT	NA	0	0	1
UBE2C	2807	+	CHH	ATCCC	NA	0	0	1
UBE2C	2808	+	CHG	TCCCG	NA	0	0	1
UBE2C	2809	+	CG	CCCGA	NA	0	0	1
UBE2C	2810	-	CG	CTCGG	NA	0	0	1
UBE2C	2812	-	CHH	CCCTC	NA	0	0	1
UBE2C	2813	-	CHH	TCCCT	NA	0	0	1
UBE2C	2814	-	CHH	CTCCC	NA	0	0	1
UBE2C	2816	-	CHH	GACTC	NA	0	0	1
UBE2C	2818	+	CHG	GTCTG	NA	0	0	1
UBE2C	2820	-	CHG	TCCAG	NA	0	0	1
UBE2C	2821	-	CHH	TTCCA	NA	0	0	1
UBE2C	2827	-	CHH	CCCTA	NA	0	0	1
UBE2C	2828	-	CHH	TCCCT	NA	0	0	1
UBE2C	2829	-	CHH	CTCCC	NA	0	0	1
UBE2C	2831	-	CHH	CCCTC	NA	0	0	1
UBE2C	2832	-	CHH	ACCCT	NA	0	0	1
UBE2C	2833	-	CHH	CACCC	NA	0	0	1
UBE2C	2835	-	CHH	CTCAC	NA	0	0	1
UBE2C	2837	-	CHH	TCCTC	NA	0	0	1
UBE2C	2838	-	CHH	GTCCT	NA	0	0	1
UBE2C	2840	+	CHH	GACTC	NA	0	0	1
UBE2C	2842	+	CG	CTCGC	NA	0	0	1
UBE2C	2843	-	CG	AGCGA	NA	0	0	1
UBE2C	2844	+	CHH	CGCTA	NA	0	0	1
UBE2C	2847	-	CHH	TCCTA	NA	0	0	1
UBE2C	2848	-	CHH	ATCCT	NA	0	0	1
UBE2C	2851	+	CG	ATCGT	NA	0	0	1
UBE2C	2852	-	CG	GACGA	NA	0	0	1
UBE2C	2854	+	CHH	GTCCT	NA	0	0	1
UBE2C	2855	+	CHG	TCCTG	NA	0	0	1
UBE2C	2857	-	CHG	CACAG	NA	0	0	1
UBE2C	2859	-	CHH	TCCAC	NA	0	0	1
UBE2C	2860	-	CHH	ATCCA	NA	0	0	1
UBE2C	2863	+	CHG	ATCTG	NA	0	0	1
UBE2C	2865	-	CHG	ACCAG	NA	0	0	1
UBE2C	2866	-	CHH	CACCA	NA	0	0	1
UBE2C	2868	-	CHH	CTCAC	NA	0	0	1
UBE2C	2870	-	CHH	TACTC	NA	0	0	1
UBE2C	2875	+	CHH	TACCC	NA	0	0	1
UBE2C	2876	+	CHH	ACCCT	NA	0	0	1
UBE2C	2877	+	CHG	CCCTG	NA	0	0	1
UBE2C	2879	-	CHG	CTCAG	NA	0	0	1
UBE2C	2881	-	CHH	AGCTC	NA	0	0	1
UBE2C	2882	+	CHG	AGCTG	NA	0	0	1
UBE2C	2884	-	CHG	CTCAG	NA	0	0	1
UBE2C	2886	-	CHH	GGCTC	NA	0	0	1
UBE2C	2887	+	CHH	AGCCT	NA	0	0	1
UBE2C	2888	+	CHG	GCCTG	NA	0	0	1
UBE2C	2890	-	CHG	GTCAG	NA	0	0	1
UBE2C	2892	+	CHH	GACCT	NA	0	0	1
UBE2C	2893	+	CHH	ACCTT	NA	0	0	1
UBE2C	2896	-	CHH	ACCAA	NA	0	0	1
UBE2C	2897	-	CHH	CACCA	NA	0	0	1
UBE2C	2899	-	CHH	ATCAC	NA	0	0	1
UBE2C	2902	-	CHH	CACAT	NA	0	0	1
UBE2C	2904	-	CHH	CCCAC	NA	0	0	1
UBE2C	2905	-	CHH	CCCCA	NA	0	0	1
UBE2C	2906	-	CHH	TCCCC	NA	0	0	1
UBE2C	2907	-	CHH	CTCCC	NA	0	0	1
UBE2C	2909	-	CHH	GGCTC	NA	0	0	1
UBE2C	2910	+	CHH	AGCCT	NA	0	0	1
UBE2C	2911	+	CHH	GCCTC	NA	0	0	1
UBE2C	2913	+	CHH	CTCCA	NA	0	0	1
UBE2C	2914	+	CHH	TCCAT	NA	0	0	1
UBE2C	2917	-	CHH	GTCAT	NA	0	0	1
UBE2C	2919	+	CG	GACGG	NA	0	0	1
UBE2C	2920	-	CG	GCCGT	NA	0	0	1
UBE2C	2921	-	CHG	AGCCG	NA	0	0	1
UBE2C	2922	+	CHH	GGCTC	NA	0	0	1
UBE2C	2924	+	CHH	CTCCC	NA	0	0	1
UBE2C	2925	+	CHH	TCCCC	NA	0	0	1
UBE2C	2926	+	CHH	CCCCC	NA	0	0	1
UBE2C	2927	+	CHH	CCCCT	NA	0	0	1
UBE2C	2928	+	CHG	CCCTG	NA	0	0	1
UBE2C	2930	-	CHG	CTCAG	NA	0	0	1
UBE2C	2932	-	CHH	ATCTC	NA	0	0	1
UBE2C	2936	+	CHG	TTCAG	NA	0	0	1
UBE2C	2938	-	CHG	ACCTG	NA	0	0	1
UBE2C	2939	-	CHH	CACCT	NA	0	0	1
UBE2C	2941	-	CHH	CCCAC	NA	0	0	1
UBE2C	2942	-	CHH	TCCCA	NA	0	0	1
UBE2C	2943	-	CHH	CTCCC	NA	0	0	1
UBE2C	2945	-	CHH	TTCTC	NA	0	0	1
UBE2C	2948	-	CHH	ATCTT	NA	0	0	1
UBE2C	2951	-	CHH	TGCAT	NA	0	0	1
UBE2C	2952	+	CHH	TGCAC	NA	0	0	1
UBE2C	2954	+	CHG	CACCG	NA	0	0	1
UBE2C	2955	+	CG	ACCGT	NA	0	0	1
UBE2C	2956	-	CG	GACGG	NA	0	0	1
UBE2C	2958	+	CHG	GTCTG	NA	0	0	1
UBE2C	2960	-	CHG	TCCAG	NA	0	0	1
UBE2C	2961	-	CHH	CTCCA	NA	0	0	1
UBE2C	2963	-	CHH	GCCTC	NA	0	0	1
UBE2C	2964	-	CHH	GGCCT	NA	0	0	1
UBE2C	2965	+	CHH	GGCCT	NA	0	0	1
UBE2C	2966	+	CHG	GCCTG	NA	0	0	1
UBE2C	2968	-	CHG	GCCAG	NA	0	0	1
UBE2C	2969	-	CHH	GGCCA	NA	0	0	1
UBE2C	2970	+	CHH	GGCCC	NA	0	0	1
UBE2C	2971	+	CHH	GCCCA	NA	0	0	1
UBE2C	2972	+	CHH	CCCAT	NA	0	0	1
UBE2C	2975	+	CHH	ATCCA	NA	0	0	1
UBE2C	2976	+	CHG	TCCAG	NA	0	0	1
UBE2C	2978	-	CHG	GTCTG	NA	0	0	1
UBE2C	2980	+	CHH	GACTC	NA	0	0	1
UBE2C	2982	+	CHH	CTCCC	NA	0	0	1
UBE2C	2983	+	CHH	TCCCA	NA	0	0	1
UBE2C	2984	+	CHG	CCCAG	NA	0	0	1
UBE2C	2986	-	CHG	ACCTG	NA	0	0	1
UBE2C	2987	-	CHH	TACCT	NA	0	0	1
UBE2C	2991	+	CHH	AACCC	NA	0	0	1
UBE2C	2992	+	CHH	ACCCC	NA	0	0	1
UBE2C	2993	+	CHG	CCCCG	NA	0	0	1
UBE2C	2994	+	CG	CCCGA	NA	0	0	1
UBE2C	2995	-	CG	TTCGG	NA	0	0	1
UBE2C	3000	+	CHH	TACTC	NA	0	0	1
UBE2C	3002	+	CHH	CTCTT	NA	0	0	1
UBE2C	3009	+	CHG	TTCAG	NA	0	0	1
UBE2C	3011	-	CHG	GCCTG	NA	0	0	1
UBE2C	3012	-	CHH	AGCCT	NA	0	0	1
UBE2C	3013	+	CHH	GGCTA	NA	0	0	1
UBE2C	3016	+	CHG	TACAG	NA	0	0	1
UBE2C	3018	-	CHG	TGCTG	NA	0	0	1
UBE2C	3019	+	CHG	AGCAG	NA	0	0	1
UBE2C	3021	-	CHG	TCCTG	NA	0	0	1
UBE2C	3022	-	CHH	CTCCT	NA	0	0	1
UBE2C	3024	-	CHH	AGCTC	NA	0	0	1
UBE2C	3025	+	CHG	AGCTG	NA	0	0	1
UBE2C	3027	-	CHG	ATCAG	NA	0	0	1
UBE2C	3030	-	CHH	GTCAT	NA	0	0	1
UBE2C	3032	+	CHH	GACCC	NA	0	0	1
UBE2C	3033	+	CHH	ACCCT	NA	0	0	1
UBE2C	3034	+	CHH	CCCTC	NA	0	0	1
UBE2C	3036	+	CHH	CTCAT	NA	0	0	1
UBE2C	3039	-	CHH	ACCAT	NA	0	0	1
UBE2C	3040	-	CHH	CACCA	NA	0	0	1
UBE2C	3042	-	CHH	CTCAC	NA	0	0	1
UBE2C	3044	-	CHH	CACTC	NA	0	0	1
UBE2C	3046	-	CHH	ATCAC	NA	0	0	1
UBE2C	3052	-	CHH	CACTT	NA	0	0	1
UBE2C	3054	-	CHH	GGCAC	NA	0	0	1
UBE2C	3055	+	CHH	TGCCC	NA	0	0	1
UBE2C	3056	+	CHH	GCCCA	NA	0	0	1
UBE2C	3057	+	CHG	CCCAG	NA	0	0	1
UBE2C	3059	-	CHG	TTCTG	NA	0	0	1
UBE2C	3062	+	CHH	AACCC	NA	0	0	1
UBE2C	3063	+	CHH	ACCCC	NA	0	0	1
UBE2C	3064	+	CHH	CCCCA	NA	0	0	1
UBE2C	3065	+	CHG	CCCAG	NA	0	0	1
UBE2C	3067	-	CHG	GGCTG	NA	0	0	1
UBE2C	3068	+	CHH	AGCCT	NA	0	0	1
UBE2C	3069	+	CHH	GCCTT	NA	0	0	1
UBE2C	3072	+	CHH	TTCCA	NA	0	0	1
UBE2C	3073	+	CHH	TCCAT	NA	0	0	1
UBE2C	3076	+	CHH	ATCCA	NA	0	0	1
UBE2C	3077	+	CHH	TCCAA	NA	0	0	1
UBE2C	3084	+	CHG	TTCAG	NA	0	0	1
UBE2C	3086	-	CHG	TACTG	NA	0	0	1
UBE2C	3089	-	CHH	GGCTA	NA	0	0	1
UBE2C	3090	+	CHH	AGCCT	NA	0	0	1
UBE2C	3091	+	CHH	GCCTC	NA	0	0	1
UBE2C	3093	+	CHH	CTCCT	NA	0	0	1
UBE2C	3094	+	CHH	TCCTT	NA	0	0	1
UBE2C	3101	+	CHG	TTCCG	NA	0	0	1
UBE2C	3102	+	CG	TCCGT	NA	0	0	1
UBE2C	3103	-	CG	GACGG	NA	0	0	1
UBE2C	3105	+	CHG	GTCAG	NA	0	0	1
UBE2C	3107	-	CHG	AGCTG	NA	0	0	1
UBE2C	3108	+	CHH	AGCTT	NA	0	0	1
UBE2C	3115	-	CHH	AGCAA	NA	0	0	1
UBE2C	3116	+	CHH	TGCTA	NA	0	0	1
UBE2C	3119	-	CHH	GTCTA	NA	0	0	1
UBE2C	3121	+	CHH	GACAT	NA	0	0	1
UBE2C	3125	-	CHH	CCCTA	NA	0	0	1
UBE2C	3126	-	CHH	CCCCT	NA	0	0	1
UBE2C	3127	-	CHH	ACCCC	NA	0	0	1
UBE2C	3128	-	CHH	TACCC	NA	0	0	1
UBE2C	3133	-	CHH	TACAT	NA	0	0	1
UBE2C	3140	-	CHH	AGCAA	NA	0	0	1
UBE2C	3141	+	CHH	TGCTC	NA	0	0	1
UBE2C	3143	+	CHH	CTCCC	NA	0	0	1
UBE2C	3144	+	CHH	TCCCT	NA	0	0	1
UBE2C	3145	+	CHH	CCCTC	NA	0	0	1
UBE2C	3147	+	CHH	CTCCT	NA	0	0	1
UBE2C	3148	+	CHG	TCCTG	NA	0	0	1
UBE2C	3150	-	CHG	CCCAG	NA	0	0	1
UBE2C	3151	-	CHH	TCCCA	NA	0	0	1
UBE2C	3152	-	CHH	TTCCC	NA	0	0	1
UBE2C	3156	-	CHH	TTCTT	NA	0	0	1
UBE2C	3159	-	CHH	AACTT	NA	0	0	1
UBE2C	3162	+	CHH	TTCAT	NA	0	0	1
UBE2C	3166	+	CHH	TACAC	NA	0	0	1
UBE2C	3168	+	CHH	CACCC	NA	0	0	1
UBE2C	3169	+	CHH	ACCCC	NA	0	0	1
UBE2C	3170	+	CHH	CCCCA	NA	0	0	1
UBE2C	3171	+	CHH	CCCAC	NA	0	0	1
UBE2C	3173	+	CHH	CACCT	NA	0	0	1
UBE2C	3174	+	CHH	ACCTA	NA	0	0	1
UBE2C	3177	+	CHH	TACAC	NA	0	0	1
UBE2C	3179	+	CHH	CACCA	NA	0	0	1
UBE2C	3180	+	CHH	ACCAT	NA	0	0	1
UBE2C	3185	+	CHH	TTCTT	NA	0	0	1
UBE2C	3188	+	CHH	TTCCA	NA	0	0	1
UBE2C	3189	+	CHG	TCCAG	NA	0	0	1
UBE2C	3191	-	CHG	TGCTG	NA	0	0	1
UBE2C	3192	+	CHG	AGCAG	NA	0	0	1
UBE2C	3194	-	CHG	GACTG	NA	0	0	1
UBE2C	3196	+	CHH	GTCCC	NA	0	0	1
UBE2C	3197	+	CHH	TCCCT	NA	0	0	1
UBE2C	3198	+	CHH	CCCTC	NA	0	0	1
UBE2C	3200	+	CHH	CTCCT	NA	0	0	1
UBE2C	3201	+	CHH	TCCTC	NA	0	0	1
UBE2C	3203	+	CHH	CTCCC	NA	0	0	1
UBE2C	3204	+	CHH	TCCCA	NA	0	0	1
UBE2C	3205	+	CHH	CCCAA	NA	0	0	1
UBE2C	3210	+	CHH	TTCCA	NA	0	0	1
UBE2C	3211	+	CHH	TCCAT	NA	0	0	1
UBE2C	3214	+	CHH	ATCCC	NA	0	0	1
UBE2C	3215	+	CHH	TCCCC	NA	0	0	1
UBE2C	3216	+	CHH	CCCCC	NA	0	0	1
UBE2C	3217	+	CHH	CCCCC	NA	0	0	1
UBE2C	3218	+	CHH	CCCCA	NA	0	0	1
UBE2C	3219	+	CHH	CCCAC	NA	0	0	1
UBE2C	3221	+	CHH	CACAC	NA	0	0	1
UBE2C	3223	+	CG	CACGA	NA	0	0	1
UBE2C	3224	-	CG	TTCGT	NA	0	0	1
UBE2C	3227	-	CHH	AACTT	NA	0	0	1
UBE2C	3232	+	CHH	ATCTC	NA	0	0	1
UBE2C	3234	+	CG	CTCGA	NA	0	0	1
UBE2C	3235	-	CG	TTCGA	NA	0	0	1
UBE2C	3238	+	CHH	AACAC	NA	0	0	1
UBE2C	3240	+	CHH	CACTT	NA	0	0	1
UBE2C	3243	+	CHH	TTCCC	NA	0	0	1
UBE2C	3244	+	CHH	TCCCT	NA	0	0	1
UBE2C	3245	+	CHG	CCCTG	NA	0	0	1
UBE2C	3247	-	CHG	TTCAG	NA	0	0	1
UBE2C	3250	-	CHH	GACTT	NA	0	0	1
UBE2C	3252	+	CHH	GTCAT	NA	0	0	1
UBE2C	3256	+	CHH	TACAA	NA	0	0	1
UBE2C	3259	-	CHH	GTCTT	NA	0	0	1
UBE2C	3261	+	CHH	GACCC	NA	0	0	1
UBE2C	3262	+	CHH	ACCCT	NA	0	0	1
UBE2C	3263	+	CHH	CCCTC	NA	0	0	1
UBE2C	3265	+	CHH	CTCCC	NA	0	0	1
UBE2C	3266	+	CHH	TCCCT	NA	0	0	1
UBE2C	3267	+	CHH	CCCTA	NA	0	0	1
UBE2C	3271	+	CHH	ATCCA	NA	0	0	1
UBE2C	3272	+	CHG	TCCAG	NA	0	0	1
UBE2C	3274	-	CHG	CACTG	NA	0	0	1
UBE2C	3276	-	CHH	CACAC	NA	0	0	1
UBE2C	3278	-	CHH	GACAC	NA	0	0	1
UBE2C	3280	+	CHH	GTCCC	NA	0	0	1
UBE2C	3281	+	CHH	TCCCT	NA	0	0	1
UBE2C	3282	+	CHH	CCCTA	NA	0	0	1
UBE2C	3285	+	CHH	TACTT	NA	0	0	1
UBE2C	3288	+	CHH	TTCCT	NA	0	0	1
UBE2C	3289	+	CHH	TCCTA	NA	0	0	1
UBE2C	3292	-	CHH	GGCTA	NA	0	0	1
UBE2C	3293	+	CHH	AGCCC	NA	0	0	1
UBE2C	3294	+	CHH	GCCCC	NA	0	0	1
UBE2C	3295	+	CHH	CCCCA	NA	0	0	1
UBE2C	3296	+	CHH	CCCAA	NA	0	0	1
UBE2C	3299	+	CHH	AACCA	NA	0	0	1
UBE2C	3300	+	CHH	NACCA	NA	0	0	1

## Sheet: IOSE.methyl
#chr	pos	strand	type	context	ratio	methyl_C	normal_C	binom_p
UBE2C	3	-	CHH	ACCAT	NA	0	0	1
UBE2C	4	-	CHH	AACCA	NA	0	0	1
UBE2C	8	+	CHH	TTCCT	NA	0	0	1
UBE2C	9	+	CHH	TCCTC	NA	0	0	1
UBE2C	11	+	CHH	CTCTT	NA	0	0	1
UBE2C	14	+	CHH	TTCCT	NA	0	0	1
UBE2C	15	+	CHG	TCCTG	NA	0	0	1
UBE2C	17	-	CHG	ATCAG	NA	0	0	1
UBE2C	22	+	CHH	TTCCT	NA	0	0	1
UBE2C	23	+	CHG	TCCTG	NA	0	0	1
UBE2C	25	-	CHG	AACAG	NA	0	0	1
UBE2C	29	+	CHH	TTCCA	NA	0	0	1
UBE2C	30	+	CHH	TCCAT	NA	0	0	1
UBE2C	42	-	CHH	AGCAA	NA	0	0	1
UBE2C	43	+	CHG	TGCTG	NA	0	0	1
UBE2C	45	-	CHG	GCCAG	NA	0	0	1
UBE2C	46	-	CHH	AGCCA	NA	0	0	1
UBE2C	47	+	CHH	GGCTT	NA	0	0	1
UBE2C	51	+	CHH	TTCTT	NA	0	0	1
UBE2C	54	-	CHH	GGCAA	NA	0	0	1
UBE2C	55	+	CHH	TGCCA	NA	0	0	1
UBE2C	56	+	CHH	GCCAT	NA	0	0	1
UBE2C	62	-	CHH	AACAA	NA	0	0	1
UBE2C	69	+	CHH	AACCC	NA	0	0	1
UBE2C	70	+	CHH	ACCCA	NA	0	0	1
UBE2C	71	+	CHH	CCCAC	NA	0	0	1
UBE2C	73	+	CHH	CACCT	NA	0	0	1
UBE2C	74	+	CHH	ACCTT	NA	0	0	1
UBE2C	77	-	CHH	CCCAA	NA	0	0	1
UBE2C	78	-	CHH	ACCCA	NA	0	0	1
UBE2C	79	-	CHH	GACCC	NA	0	0	1
UBE2C	81	+	CHH	GTCCT	NA	0	0	1
UBE2C	82	+	CHH	TCCTT	NA	0	0	1
UBE2C	86	+	CG	TTCGT	NA	0	0	1
UBE2C	87	-	CG	TACGA	NA	0	0	1
UBE2C	92	+	CHH	TACTT	NA	0	0	1
UBE2C	95	-	CHH	ATCAA	NA	0	0	1
UBE2C	98	+	CHH	ATCTT	NA	0	0	1
UBE2C	103	+	CHH	AACCA	NA	0	0	1
UBE2C	104	+	CHH	ACCAA	NA	0	0	1
UBE2C	109	-	CHH	ACCTT	NA	0	0	1
UBE2C	110	-	CHH	CACCT	NA	0	0	1
UBE2C	112	-	CHH	TACAC	NA	0	0	1
UBE2C	115	-	CHH	TCCTA	NA	0	0	1
UBE2C	116	-	CHH	CTCCT	NA	0	0	1
UBE2C	118	-	CHH	TGCTC	NA	0	0	1
UBE2C	119	+	CHH	AGCAA	NA	0	0	1
UBE2C	123	-	CHH	ACCAT	NA	0	0	1
UBE2C	124	-	CHH	CACCA	NA	0	0	1
UBE2C	126	-	CHH	TCCAC	NA	0	0	1
UBE2C	127	-	CHH	ATCCA	NA	0	0	1
UBE2C	130	+	CHH	ATCCC	NA	0	0	1
UBE2C	131	+	CHH	TCCCT	NA	0	0	1
UBE2C	132	+	CHH	CCCTT	NA	0	0	1
UBE2C	142	+	CHH	TTCTT	NA	0	0	1
UBE2C	150	+	CHH	TTCTT	NA	0	0	1
UBE2C	167	+	CHH	TTCTT	NA	0	0	1
UBE2C	176	+	CHH	TTCAC	NA	0	0	1
UBE2C	178	+	CHH	CACCA	NA	0	0	1
UBE2C	179	+	CHH	ACCAC	NA	0	0	1
UBE2C	181	+	CHH	CACAC	NA	0	0	1
UBE2C	183	+	CHH	CACCA	NA	0	0	1
UBE2C	184	+	CHH	ACCAT	NA	0	0	1
UBE2C	188	+	CHH	TTCAA	NA	0	0	1
UBE2C	191	-	CHH	CTCTT	NA	0	0	1
UBE2C	193	-	CHH	CTCTC	NA	0	0	1
UBE2C	195	-	CHH	TTCTC	NA	0	0	1
UBE2C	200	-	CHH	CCCAT	NA	0	0	1
UBE2C	201	-	CHH	ACCCA	NA	0	0	1
UBE2C	202	-	CHH	GACCC	NA	0	0	1
UBE2C	204	+	CHH	GTCCT	NA	0	0	1
UBE2C	205	+	CHH	TCCTT	NA	0	0	1
UBE2C	216	-	CHH	CTCTT	NA	0	0	1
UBE2C	218	-	CHH	TTCTC	NA	0	0	1
UBE2C	221	-	CHH	GCCTT	NA	0	0	1
UBE2C	222	-	CHH	AGCCT	NA	0	0	1
UBE2C	223	+	CHH	GGCTA	NA	0	0	1
UBE2C	233	-	CHH	GACTT	NA	0	0	1
UBE2C	235	+	CHH	GTCAC	NA	0	0	1
UBE2C	237	+	CHH	CACCA	NA	0	0	1
UBE2C	238	+	CHG	ACCAG	NA	0	0	1
UBE2C	240	-	CHG	GACTG	NA	0	0	1
UBE2C	242	+	CHH	GTCCC	NA	0	0	1
UBE2C	243	+	CHH	TCCCT	NA	0	0	1
UBE2C	244	+	CHH	CCCTA	NA	0	0	1
UBE2C	247	+	CHH	TACTC	NA	0	0	1
UBE2C	249	+	CHH	CTCTC	NA	0	0	1
UBE2C	251	+	CHH	CTCCC	NA	0	0	1
UBE2C	252	+	CHH	TCCCA	NA	0	0	1
UBE2C	253	+	CHH	CCCAT	NA	0	0	1
UBE2C	256	+	CHH	ATCCA	NA	0	0	1
UBE2C	257	+	CHH	TCCAT	NA	0	0	1
UBE2C	260	-	CHH	TTCAT	NA	0	0	1
UBE2C	263	-	CHH	TGCTT	NA	0	0	1
UBE2C	264	+	CHH	AGCAT	NA	0	0	1
UBE2C	267	+	CHH	ATCTA	NA	0	0	1
UBE2C	270	+	CHG	TACTG	NA	0	0	1
UBE2C	272	-	CHG	TACAG	NA	0	0	1
UBE2C	275	-	CHH	TACTA	NA	0	0	1
UBE2C	281	-	CHH	ATCTT	NA	0	0	1
UBE2C	285	-	CHH	GACAA	NA	0	0	1
UBE2C	287	+	CHH	GTCTC	NA	0	0	1
UBE2C	289	+	CHH	CTCAA	NA	0	0	1
UBE2C	292	-	CHH	TCCTT	NA	0	0	1
UBE2C	293	-	CHH	TTCCT	NA	0	0	1
UBE2C	296	+	CHH	AACCA	NA	0	0	1
UBE2C	297	+	CHH	ACCAT	NA	0	0	1
UBE2C	301	+	CHH	TTCCC	NA	0	0	1
UBE2C	302	+	CHH	TCCCA	NA	0	0	1
UBE2C	303	+	CHH	CCCAT	NA	0	0	1
UBE2C	306	+	CHH	ATCCC	NA	0	0	1
UBE2C	307	+	CHH	TCCCT	NA	0	0	1
UBE2C	308	+	CHH	CCCTC	NA	0	0	1
UBE2C	310	+	CHH	CTCCC	NA	0	0	1
UBE2C	311	+	CHH	TCCCC	NA	0	0	1
UBE2C	312	+	CHH	CCCCA	NA	0	0	1
UBE2C	313	+	CHH	CCCAC	NA	0	0	1
UBE2C	315	+	CHH	CACTT	NA	0	0	1
UBE2C	319	+	CHH	TACTC	NA	0	0	1
UBE2C	321	+	CHH	CTCTT	NA	0	0	1
UBE2C	324	+	CHG	TTCCG	NA	0	0	1
UBE2C	325	+	CG	TCCGT	NA	0	0	1
UBE2C	326	-	CG	TACGG	NA	0	0	1
UBE2C	329	+	CHH	TACTA	NA	0	0	1
UBE2C	336	-	CHH	TACAA	NA	0	0	1
UBE2C	341	+	CHG	AACCG	NA	0	0	1
UBE2C	342	+	CG	ACCGC	NA	0	0	1
UBE2C	343	-	CG	TGCGG	NA	0	0	1
UBE2C	344	+	CHH	CGCAT	NA	0	0	1
UBE2C	347	+	CHH	ATCCC	NA	0	0	1
UBE2C	348	+	CHH	TCCCC	NA	0	0	1
UBE2C	349	+	CHH	CCCCC	NA	0	0	1
UBE2C	350	+	CHG	CCCCG	NA	0	0	1
UBE2C	351	+	CG	CCCGC	NA	0	0	1
UBE2C	352	-	CG	AGCGG	NA	0	0	1
UBE2C	353	+	CHH	CGCTT	NA	0	0	1
UBE2C	356	+	CHH	TTCCA	NA	0	0	1
UBE2C	357	+	CHH	TCCAC	NA	0	0	1
UBE2C	359	+	CHH	CACCT	NA	0	0	1
UBE2C	360	+	CHH	ACCTA	NA	0	0	1
UBE2C	363	-	CHH	TACTA	NA	0	0	1
UBE2C	366	-	CHH	TGCTA	NA	0	0	1
UBE2C	367	+	CHG	AGCAG	NA	0	0	1
UBE2C	369	-	CHG	GCCTG	NA	0	0	1
UBE2C	370	-	CHH	GGCCT	NA	0	0	1
UBE2C	371	+	CHH	GGCCT	NA	0	0	1
UBE2C	372	+	CHH	GCCTT	NA	0	0	1
UBE2C	376	+	CHH	TACAT	NA	0	0	1
UBE2C	383	+	CHG	AACAG	NA	0	0	1
UBE2C	385	-	CHG	ATCTG	NA	0	0	1
UBE2C	388	-	CHH	AACAT	NA	0	0	1
UBE2C	395	-	CHH	TTCAT	NA	0	0	1
UBE2C	398	-	CHH	CACTT	NA	0	0	1
UBE2C	400	-	CHH	AACAC	NA	0	0	1
UBE2C	404	+	CHG	TACTG	NA	0	0	1
UBE2C	406	-	CHG	CTCAG	NA	0	0	1
UBE2C	408	-	CHH	AACTC	NA	0	0	1
UBE2C	411	-	CHH	TCCAA	NA	0	0	1
UBE2C	412	-	CHH	CTCCA	NA	0	0	1
UBE2C	414	-	CHH	CACTC	NA	0	0	1
UBE2C	416	-	CHH	TTCAC	NA	0	0	1
UBE2C	421	-	CHH	TTCAT	NA	0	0	1
UBE2C	425	+	CHG	ATCAG	NA	0	0	1
UBE2C	427	-	CHG	GCCTG	NA	0	0	1
UBE2C	428	-	CHH	TGCCT	NA	0	0	1
UBE2C	429	+	CHH	GGCAA	NA	0	0	1
UBE2C	433	-	CHH	GTCAT	NA	0	0	1
UBE2C	435	+	CHH	GACCA	NA	0	0	1
UBE2C	436	+	CHH	ACCAC	NA	0	0	1
UBE2C	438	+	CHH	CACTC	NA	0	0	1
UBE2C	440	+	CHH	CTCTC	NA	0	0	1
UBE2C	442	+	CHH	CTCCC	NA	0	0	1
UBE2C	443	+	CHH	TCCCT	NA	0	0	1
UBE2C	444	+	CHH	CCCTT	NA	0	0	1
UBE2C	447	-	CHH	AGCAA	NA	0	0	1
UBE2C	448	+	CHH	TGCTC	NA	0	0	1
UBE2C	450	+	CHH	CTCCT	NA	0	0	1
UBE2C	451	+	CHG	TCCTG	NA	0	0	1
UBE2C	453	-	CHG	GGCAG	NA	0	0	1
UBE2C	454	+	CHH	TGCCT	NA	0	0	1
UBE2C	455	+	CHH	GCCTC	NA	0	0	1
UBE2C	457	+	CHG	CTCAG	NA	0	0	1
UBE2C	459	-	CHG	GCCTG	NA	0	0	1
UBE2C	460	-	CHH	GGCCT	NA	0	0	1
UBE2C	461	+	CHH	GGCCT	NA	0	0	1
UBE2C	462	+	CHH	GCCTA	NA	0	0	1
UBE2C	465	+	CHH	TACCT	NA	0	0	1
UBE2C	466	+	CHH	ACCTC	NA	0	0	1
UBE2C	468	+	CHH	CTCCT	NA	0	0	1
UBE2C	469	+	CHH	TCCTC	NA	0	0	1
UBE2C	471	+	CHH	CTCAT	NA	0	0	1
UBE2C	474	+	CG	ATCGA	NA	0	0	1
UBE2C	475	-	CG	CTCGA	NA	0	0	1
UBE2C	477	-	CHH	TCCTC	NA	0	0	1
UBE2C	478	-	CHH	CTCCT	NA	0	0	1
UBE2C	480	-	CHH	TCCTC	NA	0	0	1
UBE2C	481	-	CHH	GTCCT	NA	0	0	1
UBE2C	483	+	CHH	GACAT	NA	0	0	1
UBE2C	486	+	CHG	ATCCG	NA	0	0	1
UBE2C	487	+	CG	TCCGG	NA	0	0	1
UBE2C	488	-	CG	CCCGG	NA	0	0	1
UBE2C	489	-	CHG	TCCCG	NA	0	0	1
UBE2C	490	-	CHH	GTCCC	NA	0	0	1
UBE2C	492	+	CHH	GACCT	NA	0	0	1
UBE2C	493	+	CHH	ACCTT	NA	0	0	1
UBE2C	496	-	CHH	CGCAA	NA	0	0	1
UBE2C	497	+	CG	TGCGG	NA	0	0	1
UBE2C	498	-	CG	GCCGC	NA	0	0	1
UBE2C	499	-	CHG	GGCCG	NA	0	0	1
UBE2C	500	+	CHH	GGCCA	NA	0	0	1
UBE2C	501	+	CHG	GCCAG	NA	0	0	1
UBE2C	503	-	CHG	CACTG	NA	0	0	1
UBE2C	505	-	CHH	ATCAC	NA	0	0	1
UBE2C	508	-	CHH	ATCAT	NA	0	0	1
UBE2C	513	+	CHG	TACAG	NA	0	0	1
UBE2C	515	-	CHG	ACCTG	NA	0	0	1
UBE2C	516	-	CHH	TACCT	NA	0	0	1
UBE2C	522	+	CHH	AACCA	NA	0	0	1
UBE2C	523	+	CHG	ACCAG	NA	0	0	1
UBE2C	525	-	CHG	CACTG	NA	0	0	1
UBE2C	527	-	CHH	CCCAC	NA	0	0	1
UBE2C	528	-	CHH	ACCCA	NA	0	0	1
UBE2C	529	-	CHH	GACCC	NA	0	0	1
UBE2C	531	+	CHH	GTCTC	NA	0	0	1
UBE2C	533	+	CHH	CTCCT	NA	0	0	1
UBE2C	534	+	CHG	TCCTG	NA	0	0	1
UBE2C	536	-	CHG	GGCAG	NA	0	0	1
UBE2C	537	+	CHH	TGCCC	NA	0	0	1
UBE2C	538	+	CHH	GCCCC	NA	0	0	1
UBE2C	539	+	CHH	CCCCT	NA	0	0	1
UBE2C	540	+	CHH	CCCTT	NA	0	0	1
UBE2C	543	+	CHH	TTCTC	NA	0	0	1
UBE2C	545	+	CHH	CTCCT	NA	0	0	1
UBE2C	546	+	CHH	TCCTC	NA	0	0	1
UBE2C	548	+	CHH	CTCTC	NA	0	0	1
UBE2C	550	+	CHH	CTCCC	NA	0	0	1
UBE2C	551	+	CHH	TCCCT	NA	0	0	1
UBE2C	552	+	CHG	CCCTG	NA	0	0	1
UBE2C	554	-	CHG	GGCAG	NA	0	0	1
UBE2C	555	+	CHH	TGCCT	NA	0	0	1
UBE2C	556	+	CHH	GCCTC	NA	0	0	1
UBE2C	558	+	CHH	CTCCA	NA	0	0	1
UBE2C	559	+	CHH	TCCAA	NA	0	0	1
UBE2C	565	-	CHH	GGCTA	NA	0	0	1
UBE2C	566	+	CHH	AGCCC	NA	0	0	1
UBE2C	567	+	CHH	GCCCC	NA	0	0	1
UBE2C	568	+	CHH	CCCCT	NA	0	0	1
UBE2C	569	+	CHH	CCCTA	NA	0	0	1
UBE2C	572	-	CHH	TTCTA	NA	0	0	1
UBE2C	576	-	CHH	CTCAT	NA	0	0	1
UBE2C	578	-	CHH	GCCTC	NA	0	0	1
UBE2C	579	-	CHH	TGCCT	NA	0	0	1
UBE2C	580	+	CHG	GGCAG	NA	0	0	1
UBE2C	582	-	CHG	CCCTG	NA	0	0	1
UBE2C	583	-	CHH	GCCCT	NA	0	0	1
UBE2C	584	-	CHH	GGCCC	NA	0	0	1
UBE2C	585	+	CHH	GGCCT	NA	0	0	1
UBE2C	586	+	CHH	GCCTA	NA	0	0	1
UBE2C	589	+	CHH	TACAT	NA	0	0	1
UBE2C	592	+	CHH	ATCCT	NA	0	0	1
UBE2C	593	+	CHH	TCCTC	NA	0	0	1
UBE2C	595	+	CHH	CTCAC	NA	0	0	1
UBE2C	597	+	CHH	CACTT	NA	0	0	1
UBE2C	600	+	CHH	TTCCC	NA	0	0	1
UBE2C	601	+	CHH	TCCCC	NA	0	0	1
UBE2C	602	+	CHH	CCCCC	NA	0	0	1
UBE2C	603	+	CHH	CCCCA	NA	0	0	1
UBE2C	604	+	CHH	CCCAA	NA	0	0	1
UBE2C	607	+	CHH	AACTT	NA	0	0	1
UBE2C	610	+	CHH	TTCTC	NA	0	0	1
UBE2C	612	+	CHH	CTCTC	NA	0	0	1
UBE2C	614	+	CHH	CTCTT	NA	0	0	1
UBE2C	617	+	CHH	TTCAA	NA	0	0	1
UBE2C	621	-	CHH	GACAT	NA	0	0	1
UBE2C	623	+	CHG	GTCTG	NA	0	0	1
UBE2C	625	-	CHG	AACAG	NA	0	0	1
UBE2C	628	+	CHH	TTCCA	NA	0	0	1
UBE2C	629	+	CHG	TCCAG	NA	0	0	1
UBE2C	631	-	CHG	CTCTG	NA	0	0	1
UBE2C	633	-	CHH	TCCTC	NA	0	0	1
UBE2C	634	-	CHH	ATCCT	NA	0	0	1
UBE2C	637	-	CHH	GGCAT	NA	0	0	1
UBE2C	638	+	CHH	TGCCT	NA	0	0	1
UBE2C	639	+	CHG	GCCTG	NA	0	0	1
UBE2C	641	-	CHG	TCCAG	NA	0	0	1
UBE2C	642	-	CHH	ATCCA	NA	0	0	1
UBE2C	645	+	CHG	ATCTG	NA	0	0	1
UBE2C	647	-	CHG	TTCAG	NA	0	0	1
UBE2C	650	-	CHH	AGCTT	NA	0	0	1
UBE2C	651	+	CHH	AGCTA	NA	0	0	1
UBE2C	654	-	CHH	CTCTA	NA	0	0	1
UBE2C	656	-	CHH	TCCTC	NA	0	0	1
UBE2C	657	-	CHH	TTCCT	NA	0	0	1
UBE2C	662	-	CHH	TTCAA	NA	0	0	1
UBE2C	667	+	CHH	ATCCT	NA	0	0	1
UBE2C	668	+	CHH	TCCTT	NA	0	0	1
UBE2C	672	-	CHH	GACAA	NA	0	0	1
UBE2C	674	+	CHH	GTCCT	NA	0	0	1
UBE2C	675	+	CHH	TCCTA	NA	0	0	1
UBE2C	678	+	CHH	TACCC	NA	0	0	1
UBE2C	679	+	CHH	ACCCT	NA	0	0	1
UBE2C	680	+	CHH	CCCTC	NA	0	0	1
UBE2C	682	+	CHH	CTCCT	NA	0	0	1
UBE2C	683	+	CHG	TCCTG	NA	0	0	1
UBE2C	685	-	CHG	TCCAG	NA	0	0	1
UBE2C	686	-	CHH	ATCCA	NA	0	0	1
UBE2C	689	-	CHH	ACCAT	NA	0	0	1
UBE2C	690	-	CHH	CACCA	NA	0	0	1
UBE2C	692	-	CHH	TCCAC	NA	0	0	1
UBE2C	693	-	CHH	CTCCA	NA	0	0	1
UBE2C	695	-	CHH	TTCTC	NA	0	0	1
UBE2C	698	-	CHH	ATCTT	NA	0	0	1
UBE2C	701	-	CHH	CTCAT	NA	0	0	1
UBE2C	703	-	CHH	TTCTC	NA	0	0	1
UBE2C	707	-	CHH	TACTT	NA	0	0	1
UBE2C	713	-	CHH	TCCAT	NA	0	0	1
UBE2C	714	-	CHH	CTCCA	NA	0	0	1
UBE2C	716	-	CHH	GTCTC	NA	0	0	1
UBE2C	718	+	CHH	GACAC	NA	0	0	1
UBE2C	720	+	CHH	CACTA	NA	0	0	1
UBE2C	723	+	CG	TACGG	NA	0	0	1
UBE2C	724	-	CG	TCCGT	NA	0	0	1
UBE2C	725	-	CHG	GTCCG	NA	0	0	1
UBE2C	727	+	CHG	GACAG	NA	0	0	1
UBE2C	729	-	CHG	CTCTG	NA	0	0	1
UBE2C	731	-	CHH	TTCTC	NA	0	0	1
UBE2C	735	-	CHH	CTCAT	NA	0	0	1
UBE2C	737	-	CHH	TGCTC	NA	0	0	1
UBE2C	738	+	CHH	AGCAT	NA	0	0	1
UBE2C	741	+	CG	ATCGT	NA	0	0	1
UBE2C	742	-	CG	CACGA	NA	0	0	1
UBE2C	744	-	CHH	AGCAC	NA	0	0	1
UBE2C	745	+	CHG	TGCTG	NA	0	0	1
UBE2C	747	-	CHG	AACAG	NA	0	0	1
UBE2C	750	-	CHH	TTCAA	NA	0	0	1
UBE2C	753	-	CHH	TGCTT	NA	0	0	1
UBE2C	754	+	CHH	AGCAC	NA	0	0	1
UBE2C	756	+	CHH	CACCT	NA	0	0	1
UBE2C	757	+	CHH	ACCTC	NA	0	0	1
UBE2C	759	+	CHH	CTCCA	NA	0	0	1
UBE2C	760	+	CHH	TCCAC	NA	0	0	1
UBE2C	762	+	CHG	CACAG	NA	0	0	1
UBE2C	764	-	CHG	GTCTG	NA	0	0	1
UBE2C	766	+	CHH	GACCT	NA	0	0	1
UBE2C	767	+	CHG	ACCTG	NA	0	0	1
UBE2C	769	-	CHG	CTCAG	NA	0	0	1
UBE2C	771	-	CHH	GCCTC	NA	0	0	1
UBE2C	772	-	CHH	GGCCT	NA	0	0	1
UBE2C	773	+	CHG	GGCCG	NA	0	0	1
UBE2C	774	+	CG	GCCGG	NA	0	0	1
UBE2C	775	-	CG	CCCGG	NA	0	0	1
UBE2C	776	-	CHG	ACCCG	NA	0	0	1
UBE2C	777	-	CHH	GACCC	NA	0	0	1
UBE2C	779	+	CHH	GTCCC	NA	0	0	1
UBE2C	780	+	CHH	TCCCC	NA	0	0	1
UBE2C	781	+	CHH	CCCCT	NA	0	0	1
UBE2C	782	+	CHG	CCCTG	NA	0	0	1
UBE2C	784	-	CHG	GCCAG	NA	0	0	1
UBE2C	785	-	CHH	GGCCA	NA	0	0	1
UBE2C	786	+	CHH	GGCCA	NA	0	0	1
UBE2C	787	+	CHH	GCCAC	NA	0	0	1
UBE2C	789	+	CHH	CACAC	NA	0	0	1
UBE2C	791	+	CHH	CACTT	NA	0	0	1
UBE2C	794	-	CHH	GCCAA	NA	0	0	1
UBE2C	795	-	CHH	TGCCA	NA	0	0	1
UBE2C	796	+	CHG	GGCAG	NA	0	0	1
UBE2C	798	-	CHG	GGCTG	NA	0	0	1
UBE2C	799	+	CHH	AGCCC	NA	0	0	1
UBE2C	800	+	CHH	GCCCT	NA	0	0	1
UBE2C	801	+	CHH	CCCTC	NA	0	0	1
UBE2C	803	+	CHH	CTCCT	NA	0	0	1
UBE2C	804	+	CHH	TCCTC	NA	0	0	1
UBE2C	806	+	CHH	CTCCA	NA	0	0	1
UBE2C	807	+	CHH	TCCAA	NA	0	0	1
UBE2C	811	-	CHH	GGCTT	NA	0	0	1
UBE2C	812	+	CHH	AGCCC	NA	0	0	1
UBE2C	813	+	CHH	GCCCT	NA	0	0	1
UBE2C	814	+	CHH	CCCTC	NA	0	0	1
UBE2C	816	+	CHH	CTCTT	NA	0	0	1
UBE2C	819	+	CHH	TTCCT	NA	0	0	1
UBE2C	820	+	CHH	TCCTC	NA	0	0	1
UBE2C	822	+	CHH	CTCAC	NA	0	0	1
UBE2C	824	+	CG	CACGT	NA	0	0	1
UBE2C	825	-	CG	CACGT	NA	0	0	1
UBE2C	827	-	CHH	GCCAC	NA	0	0	1
UBE2C	828	-	CHH	AGCCA	NA	0	0	1
UBE2C	829	+	CHG	GGCTG	NA	0	0	1
UBE2C	831	-	CHG	CTCAG	NA	0	0	1
UBE2C	833	-	CHH	GCCTC	NA	0	0	1
UBE2C	834	-	CHH	GGCCT	NA	0	0	1
UBE2C	835	+	CHH	GGCCA	NA	0	0	1
UBE2C	836	+	CHH	GCCAC	NA	0	0	1
UBE2C	838	+	CHG	CACCG	NA	0	0	1
UBE2C	839	+	CG	ACCGC	NA	0	0	1
UBE2C	840	-	CG	AGCGG	NA	0	0	1
UBE2C	841	+	CHG	CGCTG	NA	0	0	1
UBE2C	843	-	CHG	CCCAG	NA	0	0	1
UBE2C	844	-	CHH	TCCCA	NA	0	0	1
UBE2C	845	-	CHH	GTCCC	NA	0	0	1
UBE2C	847	+	CHG	GACTG	NA	0	0	1
UBE2C	849	-	CHG	AGCAG	NA	0	0	1
UBE2C	850	+	CHH	TGCTC	NA	0	0	1
UBE2C	852	+	CHH	CTCCT	NA	0	0	1
UBE2C	853	+	CHH	TCCTA	NA	0	0	1
UBE2C	856	-	CHH	ATCTA	NA	0	0	1
UBE2C	859	-	CHH	TCCAT	NA	0	0	1
UBE2C	860	-	CHH	ATCCA	NA	0	0	1
UBE2C	863	+	CHH	ATCTC	NA	0	0	1
UBE2C	865	+	CHG	CTCAG	NA	0	0	1
UBE2C	867	-	CHG	CGCTG	NA	0	0	1
UBE2C	868	+	CG	AGCGG	NA	0	0	1
UBE2C	869	-	CG	GCCGC	NA	0	0	1
UBE2C	870	-	CHG	TGCCG	NA	0	0	1
UBE2C	871	+	CHH	GGCAT	NA	0	0	1
UBE2C	877	-	CHH	AGCTT	NA	0	0	1
UBE2C	878	+	CHG	AGCTG	NA	0	0	1
UBE2C	880	-	CHG	CACAG	NA	0	0	1
UBE2C	882	-	CHH	GGCAC	NA	0	0	1
UBE2C	883	+	CHH	TGCCT	NA	0	0	1
UBE2C	884	+	CHG	GCCTG	NA	0	0	1
UBE2C	886	-	CHG	CTCAG	NA	0	0	1
UBE2C	888	-	CHH	CGCTC	NA	0	0	1
UBE2C	889	+	CG	AGCGA	NA	0	0	1
UBE2C	890	-	CG	CTCGC	NA	0	0	1
UBE2C	892	-	CHH	AACTC	NA	0	0	1
UBE2C	896	-	CHH	TACAA	NA	0	0	1
UBE2C	899	-	CHH	CACTA	NA	0	0	1
UBE2C	901	-	CHH	GTCAC	NA	0	0	1
UBE2C	903	+	CHH	GACTC	NA	0	0	1
UBE2C	905	+	CHH	CTCAC	NA	0	0	1
UBE2C	907	+	CHG	CACTG	NA	0	0	1
UBE2C	909	-	CHG	TGCAG	NA	0	0	1
UBE2C	910	+	CHH	TGCAC	NA	0	0	1
UBE2C	912	+	CHG	CACAG	NA	0	0	1
UBE2C	914	-	CHG	TGCTG	NA	0	0	1
UBE2C	915	+	CHH	AGCAC	NA	0	0	1
UBE2C	917	+	CHH	CACCC	NA	0	0	1
UBE2C	918	+	CHH	ACCCC	NA	0	0	1
UBE2C	919	+	CHH	CCCCC	NA	0	0	1
UBE2C	920	+	CHH	CCCCA	NA	0	0	1
UBE2C	921	+	CHG	CCCAG	NA	0	0	1
UBE2C	923	-	CHG	GTCTG	NA	0	0	1
UBE2C	925	+	CHH	GACTA	NA	0	0	1
UBE2C	928	-	CHH	TGCTA	NA	0	0	1
UBE2C	929	+	CHH	AGCAT	NA	0	0	1
UBE2C	932	-	CHH	CACAT	NA	0	0	1
UBE2C	934	-	CHH	ACCAC	NA	0	0	1
UBE2C	935	-	CHH	AACCA	NA	0	0	1
UBE2C	938	+	CHH	TTCTA	NA	0	0	1
UBE2C	946	-	CHH	TACAA	NA	0	0	1
UBE2C	951	-	CHH	AACTT	NA	0	0	1
UBE2C	957	-	CHH	CCCAA	NA	0	0	1
UBE2C	958	-	CHH	TCCCA	NA	0	0	1
UBE2C	959	-	CHH	ATCCC	NA	0	0	1
UBE2C	964	-	CHH	TTCTT	NA	0	0	1
UBE2C	968	+	CHH	AACAA	NA	0	0	1
UBE2C	976	+	CHG	AACAG	NA	0	0	1
UBE2C	978	-	CHG	AACTG	NA	0	0	1
UBE2C	982	-	CHH	TACAA	NA	0	0	1
UBE2C	985	-	CHH	TACTA	NA	0	0	1
UBE2C	990	+	CHH	AACAC	NA	0	0	1
UBE2C	992	+	CHG	CACAG	NA	0	0	1
UBE2C	994	-	CHG	ATCTG	NA	0	0	1
UBE2C	997	-	CHH	ACCAT	NA	0	0	1
UBE2C	998	-	CHH	CACCA	NA	0	0	1
UBE2C	1000	-	CHH	TTCAC	NA	0	0	1
UBE2C	1003	+	CHH	AACCT	NA	0	0	1
UBE2C	1004	+	CHG	ACCTG	NA	0	0	1
UBE2C	1006	-	CHG	AGCAG	NA	0	0	1
UBE2C	1007	+	CHG	TGCTG	NA	0	0	1
UBE2C	1009	-	CHG	CACAG	NA	0	0	1
UBE2C	1011	-	CHH	GGCAC	NA	0	0	1
UBE2C	1012	+	CHH	TGCCC	NA	0	0	1
UBE2C	1013	+	CHH	GCCCT	NA	0	0	1
UBE2C	1014	+	CHH	CCCTC	NA	0	0	1
UBE2C	1016	+	CHH	CTCTA	NA	0	0	1
UBE2C	1019	+	CHH	TACCT	NA	0	0	1
UBE2C	1020	+	CHH	ACCTT	NA	0	0	1
UBE2C	1023	-	CHH	CACAA	NA	0	0	1
UBE2C	1025	-	CHH	CCCAC	NA	0	0	1
UBE2C	1026	-	CHH	TCCCA	NA	0	0	1
UBE2C	1027	-	CHH	TTCCC	NA	0	0	1
UBE2C	1032	-	CHH	GTCAA	NA	0	0	1
UBE2C	1034	+	CHG	GACAG	NA	0	0	1
UBE2C	1036	-	CHG	TTCTG	NA	0	0	1
UBE2C	1039	+	CHH	AACAT	NA	0	0	1
UBE2C	1042	+	CHH	ATCAA	NA	0	0	1
UBE2C	1045	-	CHH	CCCTT	NA	0	0	1
UBE2C	1046	-	CHH	GCCCT	NA	0	0	1
UBE2C	1047	-	CHH	AGCCC	NA	0	0	1
UBE2C	1048	+	CHH	GGCTC	NA	0	0	1
UBE2C	1050	+	CHH	CTCTA	NA	0	0	1
UBE2C	1053	-	CHH	TTCTA	NA	0	0	1
UBE2C	1056	-	CHH	CACTT	NA	0	0	1
UBE2C	1058	-	CHH	CCCAC	NA	0	0	1
UBE2C	1059	-	CHH	ACCCA	NA	0	0	1
UBE2C	1060	-	CHH	CACCC	NA	0	0	1
UBE2C	1062	-	CHH	TACAC	NA	0	0	1
UBE2C	1065	-	CHH	TCCTA	NA	0	0	1
UBE2C	1066	-	CHH	TTCCT	NA	0	0	1
UBE2C	1073	-	CHH	TCCTT	NA	0	0	1
UBE2C	1074	-	CHH	GTCCT	NA	0	0	1
UBE2C	1076	+	CG	GACGA	NA	0	0	1
UBE2C	1077	-	CG	CTCGT	NA	0	0	1
UBE2C	1079	-	CHH	ATCTC	NA	0	0	1
UBE2C	1084	+	CHH	AACCC	NA	0	0	1
UBE2C	1085	+	CHH	ACCCT	NA	0	0	1
UBE2C	1086	+	CHH	CCCTC	NA	0	0	1
UBE2C	1088	+	CHH	CTCAC	NA	0	0	1
UBE2C	1090	+	CHH	CACCC	NA	0	0	1
UBE2C	1091	+	CHH	ACCCA	NA	0	0	1
UBE2C	1092	+	CHH	CCCAT	NA	0	0	1
UBE2C	1097	+	CHG	AACAG	NA	0	0	1
UBE2C	1099	-	CHG	TACTG	NA	0	0	1
UBE2C	1104	-	CHH	CTCTA	NA	0	0	1
UBE2C	1106	-	CHH	GGCTC	NA	0	0	1
UBE2C	1107	+	CHH	AGCCA	NA	0	0	1
UBE2C	1108	+	CHG	GCCAG	NA	0	0	1
UBE2C	1110	-	CHG	GCCTG	NA	0	0	1
UBE2C	1111	-	CHH	AGCCT	NA	0	0	1
UBE2C	1112	+	CHH	GGCTT	NA	0	0	1
UBE2C	1115	-	CHH	ATCAA	NA	0	0	1
UBE2C	1120	-	CHH	GTCTT	NA	0	0	1
UBE2C	1122	+	CHH	GACCA	NA	0	0	1
UBE2C	1123	+	CHH	ACCAA	NA	0	0	1
UBE2C	1126	+	CHH	AACCT	NA	0	0	1
UBE2C	1127	+	CHG	ACCTG	NA	0	0	1
UBE2C	1129	-	CHG	CCCAG	NA	0	0	1
UBE2C	1130	-	CHH	TCCCA	NA	0	0	1
UBE2C	1131	-	CHH	CTCCC	NA	0	0	1
UBE2C	1133	-	CHH	TGCTC	NA	0	0	1
UBE2C	1134	+	CHH	AGCAC	NA	0	0	1
UBE2C	1136	+	CHH	CACCA	NA	0	0	1
UBE2C	1137	+	CHH	ACCAT	NA	0	0	1
UBE2C	1140	-	CHH	TACAT	NA	0	0	1
UBE2C	1143	+	CHH	TACCC	NA	0	0	1
UBE2C	1144	+	CHH	ACCCT	NA	0	0	1
UBE2C	1145	+	CHG	CCCTG	NA	0	0	1
UBE2C	1147	-	CHG	GGCAG	NA	0	0	1
UBE2C	1148	+	CHH	TGCCC	NA	0	0	1
UBE2C	1149	+	CHG	GCCCG	NA	0	0	1
UBE2C	1150	+	CG	CCCGT	NA	0	0	1
UBE2C	1151	-	CG	GACGG	NA	0	0	1
UBE2C	1153	+	CHH	GTCTT	NA	0	0	1
UBE2C	1156	+	CHH	TTCCC	NA	0	0	1
UBE2C	1157	+	CHH	TCCCT	NA	0	0	1
UBE2C	1158	+	CHH	CCCTT	NA	0	0	1
UBE2C	1162	-	CHH	GGCAA	NA	0	0	1
UBE2C	1163	+	CHH	TGCCC	NA	0	0	1
UBE2C	1164	+	CHH	GCCCA	NA	0	0	1
UBE2C	1165	+	CHH	CCCAT	NA	0	0	1
UBE2C	1170	-	CHH	TACAA	NA	0	0	1
UBE2C	1173	-	CHH	AACTA	NA	0	0	1
UBE2C	1177	+	CHH	TTCCT	NA	0	0	1
UBE2C	1178	+	CHH	TCCTT	NA	0	0	1
UBE2C	1182	+	CHH	TACCC	NA	0	0	1
UBE2C	1183	+	CHH	ACCCA	NA	0	0	1
UBE2C	1184	+	CHG	CCCAG	NA	0	0	1
UBE2C	1186	-	CHG	AGCTG	NA	0	0	1
UBE2C	1187	+	CHH	AGCTA	NA	0	0	1
UBE2C	1192	-	CHH	TACAT	NA	0	0	1
UBE2C	1196	-	CHH	TCCTT	NA	0	0	1
UBE2C	1197	-	CHH	GTCCT	NA	0	0	1
UBE2C	1199	+	CHH	GACAT	NA	0	0	1
UBE2C	1202	-	CHH	GCCAT	NA	0	0	1
UBE2C	1203	-	CHH	TGCCA	NA	0	0	1
UBE2C	1204	+	CHG	GGCAG	NA	0	0	1
UBE2C	1206	-	CHG	TTCTG	NA	0	0	1
UBE2C	1210	-	CHH	CGCAT	NA	0	0	1
UBE2C	1211	+	CG	TGCGA	NA	0	0	1
UBE2C	1212	-	CG	ATCGC	NA	0	0	1
UBE2C	1215	-	CHH	TCCAT	NA	0	0	1
UBE2C	1216	-	CHH	CTCCA	NA	0	0	1
UBE2C	1218	-	CHH	AACTC	NA	0	0	1
UBE2C	1222	-	CHH	ATCAA	NA	0	0	1
UBE2C	1225	-	CHH	GTCAT	NA	0	0	1
UBE2C	1227	+	CHG	GACAG	NA	0	0	1
UBE2C	1229	-	CHG	ATCTG	NA	0	0	1
UBE2C	1232	+	CHH	ATCAT	NA	0	0	1
UBE2C	1237	-	CHH	TTCAT	NA	0	0	1
UBE2C	1245	-	CHH	CTCTA	NA	0	0	1
UBE2C	1247	-	CHH	AACTC	NA	0	0	1
UBE2C	1250	-	CHH	GCCAA	NA	0	0	1
UBE2C	1251	-	CHH	AGCCA	NA	0	0	1
UBE2C	1252	+	CHH	GGCTT	NA	0	0	1
UBE2C	1260	-	CHH	AGCAA	NA	0	0	1
UBE2C	1261	+	CHH	TGCTC	NA	0	0	1
UBE2C	1263	+	CHH	CTCCC	NA	0	0	1
UBE2C	1264	+	CHH	TCCCA	NA	0	0	1
UBE2C	1265	+	CHH	CCCAT	NA	0	0	1
UBE2C	1272	+	CHG	TACAG	NA	0	0	1
UBE2C	1274	-	CHG	ACCTG	NA	0	0	1
UBE2C	1275	-	CHH	AACCT	NA	0	0	1
UBE2C	1280	-	CHH	ATCTT	NA	0	0	1
UBE2C	1284	+	CHH	TACTA	NA	0	0	1
UBE2C	1289	-	CHH	TCCTT	NA	0	0	1
UBE2C	1290	-	CHH	GTCCT	NA	0	0	1
UBE2C	1292	+	CHH	GACCC	NA	0	0	1
UBE2C	1293	+	CHG	ACCCG	NA	0	0	1
UBE2C	1294	+	CG	CCCGC	NA	0	0	1
UBE2C	1295	-	CG	GGCGG	NA	0	0	1
UBE2C	1296	+	CHH	CGCCC	NA	0	0	1
UBE2C	1297	+	CHH	GCCCC	NA	0	0	1
UBE2C	1298	+	CHH	CCCCA	NA	0	0	1
UBE2C	1299	+	CHH	CCCAA	NA	0	0	1
UBE2C	1302	-	CHH	ACCTT	NA	0	0	1
UBE2C	1303	-	CHH	AACCT	NA	0	0	1
UBE2C	1307	+	CHH	TACAC	NA	0	0	1
UBE2C	1309	+	CHH	CACAC	NA	0	0	1
UBE2C	1311	+	CHH	CACTA	NA	0	0	1
UBE2C	1314	+	CHH	TACCC	NA	0	0	1
UBE2C	1315	+	CHH	ACCCA	NA	0	0	1
UBE2C	1316	+	CHH	CCCAC	NA	0	0	1
UBE2C	1318	+	CHG	CACTG	NA	0	0	1
UBE2C	1320	-	CHG	CCCAG	NA	0	0	1
UBE2C	1321	-	CHH	CCCCA	NA	0	0	1
UBE2C	1322	-	CHH	TCCCC	NA	0	0	1
UBE2C	1323	-	CHH	CTCCC	NA	0	0	1
UBE2C	1325	-	CHH	ACCTC	NA	0	0	1
UBE2C	1326	-	CHH	TACCT	NA	0	0	1
UBE2C	1329	-	CHH	TCCTA	NA	0	0	1
UBE2C	1330	-	CHH	ATCCT	NA	0	0	1
UBE2C	1336	+	CHG	TACAG	NA	0	0	1
UBE2C	1338	-	CHG	TCCTG	NA	0	0	1
UBE2C	1339	-	CHH	ATCCT	NA	0	0	1
UBE2C	1344	-	CHH	TTCAT	NA	0	0	1
UBE2C	1347	+	CHH	AACCT	NA	0	0	1
UBE2C	1348	+	CHG	ACCTG	NA	0	0	1
UBE2C	1350	-	CHG	CACAG	NA	0	0	1
UBE2C	1352	-	CHH	AACAC	NA	0	0	1
UBE2C	1355	-	CHH	AACAA	NA	0	0	1
UBE2C	1358	-	CHH	CCCAA	NA	0	0	1
UBE2C	1359	-	CHH	CCCCA	NA	0	0	1
UBE2C	1360	-	CHH	ACCCC	NA	0	0	1
UBE2C	1361	-	CHH	AACCC	NA	0	0	1
UBE2C	1367	-	CHH	AACAA	NA	0	0	1
UBE2C	1371	-	CHH	AACAA	NA	0	0	1
UBE2C	1375	-	CHH	TTCAA	NA	0	0	1
UBE2C	1378	-	CHH	GTCTT	NA	0	0	1
UBE2C	1380	+	CHG	GACAG	NA	0	0	1
UBE2C	1382	-	CHG	GACTG	NA	0	0	1
UBE2C	1384	+	CHH	GTCTT	NA	0	0	1
UBE2C	1387	-	CHH	AGCAA	NA	0	0	1
UBE2C	1388	+	CHH	TGCTC	NA	0	0	1
UBE2C	1390	+	CHG	CTCTG	NA	0	0	1
UBE2C	1392	-	CHG	AACAG	NA	0	0	1
UBE2C	1395	-	CHH	GGCAA	NA	0	0	1
UBE2C	1396	+	CHH	TGCCC	NA	0	0	1
UBE2C	1397	+	CHH	GCCCA	NA	0	0	1
UBE2C	1398	+	CHG	CCCAG	NA	0	0	1
UBE2C	1400	-	CHG	GCCTG	NA	0	0	1
UBE2C	1401	-	CHH	AGCCT	NA	0	0	1
UBE2C	1402	+	CHH	GGCTA	NA	0	0	1
UBE2C	1405	-	CHH	CTCTA	NA	0	0	1
UBE2C	1407	-	CHH	CACTC	NA	0	0	1
UBE2C	1409	-	CHH	TGCAC	NA	0	0	1
UBE2C	1410	+	CHG	TGCAG	NA	0	0	1
UBE2C	1412	-	CHG	GGCTG	NA	0	0	1
UBE2C	1413	+	CHH	AGCCT	NA	0	0	1
UBE2C	1414	+	CHH	GCCTC	NA	0	0	1
UBE2C	1416	+	CHG	CTCTG	NA	0	0	1
UBE2C	1418	-	CHG	GCCAG	NA	0	0	1
UBE2C	1419	-	CHH	AGCCA	NA	0	0	1
UBE2C	1420	+	CHH	GGCTC	NA	0	0	1
UBE2C	1422	+	CHH	CTCAA	NA	0	0	1
UBE2C	1425	-	CHH	CGCTT	NA	0	0	1
UBE2C	1426	+	CG	AGCGA	NA	0	0	1
UBE2C	1427	-	CG	ATCGC	NA	0	0	1
UBE2C	1431	+	CHH	TTCTC	NA	0	0	1
UBE2C	1433	+	CHH	CTCCC	NA	0	0	1
UBE2C	1434	+	CHG	TCCCG	NA	0	0	1
UBE2C	1435	+	CG	CCCGC	NA	0	0	1
UBE2C	1436	-	CG	GGCGG	NA	0	0	1
UBE2C	1437	+	CHH	CGCCT	NA	0	0	1
UBE2C	1438	+	CHH	GCCTC	NA	0	0	1
UBE2C	1440	+	CHG	CTCAG	NA	0	0	1
UBE2C	1442	-	CHG	GGCTG	NA	0	0	1
UBE2C	1443	+	CHH	AGCCT	NA	0	0	1
UBE2C	1444	+	CHH	GCCTC	NA	0	0	1
UBE2C	1446	+	CG	CTCGC	NA	0	0	1
UBE2C	1447	-	CG	GGCGA	NA	0	0	1
UBE2C	1448	+	CHH	CGCCA	NA	0	0	1
UBE2C	1449	+	CHG	GCCAG	NA	0	0	1
UBE2C	1451	-	CHG	TACTG	NA	0	0	1
UBE2C	1454	-	CHH	AGCTA	NA	0	0	1
UBE2C	1455	+	CHG	AGCTG	NA	0	0	1
UBE2C	1457	-	CHG	CCCAG	NA	0	0	1
UBE2C	1458	-	CHH	TCCCA	NA	0	0	1
UBE2C	1459	-	CHH	GTCCC	NA	0	0	1
UBE2C	1461	+	CHH	GACTA	NA	0	0	1
UBE2C	1464	+	CHG	TACAG	NA	0	0	1
UBE2C	1466	-	CHG	GCCTG	NA	0	0	1
UBE2C	1467	-	CHH	AGCCT	NA	0	0	1
UBE2C	1468	+	CHH	GGCTC	NA	0	0	1
UBE2C	1470	+	CG	CTCGT	NA	0	0	1
UBE2C	1471	-	CG	CACGA	NA	0	0	1
UBE2C	1473	-	CHH	GGCAC	NA	0	0	1
UBE2C	1474	+	CHH	TGCCA	NA	0	0	1
UBE2C	1475	+	CHH	GCCAC	NA	0	0	1
UBE2C	1477	+	CHH	CACCT	NA	0	0	1
UBE2C	1478	+	CHH	ACCTC	NA	0	0	1
UBE2C	1480	+	CHH	CTCAC	NA	0	0	1
UBE2C	1482	+	CHH	CACCA	NA	0	0	1
UBE2C	1483	+	CHG	ACCAG	NA	0	0	1
UBE2C	1485	-	CHG	GGCTG	NA	0	0	1
UBE2C	1486	+	CHH	AGCCT	0	0	1	1
UBE2C	1487	+	CHH	GCCTT	0	0	1	1
UBE2C	1500	+	CHH	TTCTT	0	0	1	1
UBE2C	1505	+	CHH	TTCTT	0	0	1	1
UBE2C	1521	+	CHH	TTCTT	0	0	1	1
UBE2C	1528	-	CHH	TACTT	NA	0	0	1
UBE2C	1531	-	CHH	CTCTA	NA	0	0	1
UBE2C	1533	-	CHH	GTCTC	NA	0	0	1
UBE2C	1535	+	CHG	GACAG	NA	0	0	1
UBE2C	1537	-	CHG	ACCTG	NA	0	0	1
UBE2C	1538	-	CHH	GACCT	NA	0	0	1
UBE2C	1540	+	CHH	GTCTC	NA	0	0	1
UBE2C	1542	+	CHH	CTCCC	NA	0	0	1
UBE2C	1543	+	CHH	TCCCT	NA	0	0	1
UBE2C	1544	+	CHH	CCCTA	NA	0	0	1
UBE2C	1548	+	CHH	ATCCT	NA	0	0	1
UBE2C	1549	+	CHG	TCCTG	NA	0	0	1
UBE2C	1551	-	CHG	AACAG	NA	0	0	1
UBE2C	1554	-	CHH	AGCAA	NA	0	0	1
UBE2C	1555	+	CHH	TGCTC	NA	0	0	1
UBE2C	1557	+	CHG	CTCAG	NA	0	0	1
UBE2C	1559	-	CHG	GCCTG	NA	0	0	1
UBE2C	1560	-	CHH	AGCCT	NA	0	0	1
UBE2C	1561	+	CHG	GGCTG	NA	0	0	1
UBE2C	1563	-	CHG	ACCAG	NA	0	0	1
UBE2C	1564	-	CHH	GACCA	NA	0	0	1
UBE2C	1566	+	CHH	GTCTC	NA	0	0	1
UBE2C	1568	+	CG	CTCGA	NA	0	0	1
UBE2C	1569	-	CG	TTCGA	NA	0	0	1
UBE2C	1572	+	CHH	AACTC	0	0	10	1
UBE2C	1574	+	CHH	CTCCT	0.001	209	274290	1
UBE2C	1575	+	CHG	TCCTG	0.001	536	529200	1
UBE2C	1577	-	CHG	CCCAG	NA	0	0	1
UBE2C	1578	-	CHH	ACCCA	NA	0	0	1
UBE2C	1579	-	CHH	AACCC	NA	0	0	1
UBE2C	1582	+	CHH	TTCAA	0.001	144	276954	1
UBE2C	1585	-	CHH	CACTT	NA	0	0	1
UBE2C	1587	-	CHH	ATCAC	NA	0	0	1
UBE2C	1590	+	CHH	ATCCT	0.001	264	277316	1
UBE2C	1591	+	CHH	TCCTC	0.001	196	277402	1
UBE2C	1593	+	CHH	CTCCT	0.001	217	277364	1
UBE2C	1594	+	CHG	TCCTG	0.001	193	276915	1
UBE2C	1596	-	CHG	GGCAG	NA	0	0	1
UBE2C	1597	+	CHH	TGCCT	0.001	238	276797	1
UBE2C	1598	+	CHG	GCCTG	0.001	210	276312	1
UBE2C	1600	-	CHG	CCCAG	NA	0	0	1
UBE2C	1601	-	CHH	GCCCA	NA	0	0	1
UBE2C	1602	-	CHH	GGCCC	NA	0	0	1
UBE2C	1603	+	CHH	GGCCT	0.006	1657	275810	1
UBE2C	1604	+	CHH	GCCTT	0.003	891	276713	1
UBE2C	1607	+	CHH	TTCCA	0.005	1487	276027	1
UBE2C	1608	+	CHH	TCCAA	0.005	1398	275997	1
UBE2C	1612	-	CHH	CACTT	NA	0	0	1
UBE2C	1614	-	CHH	AACAC	NA	0	0	1
UBE2C	1617	+	CG	TTCGG	0.904	250860	26519	0
UBE2C	1618	-	CG	CCCGA	NA	0	0	1
UBE2C	1619	-	CHG	TCCCG	NA	0	0	1
UBE2C	1620	-	CHH	ATCCC	NA	0	0	1
UBE2C	1625	+	CG	TACGG	0.008	2321	275040	1
UBE2C	1626	-	CG	TCCGT	NA	0	0	1
UBE2C	1627	-	CHG	GTCCG	NA	0	0	1
UBE2C	1629	+	CG	GACGT	0.92	255442	22143	0
UBE2C	1630	-	CG	CACGT	NA	0	0	1
UBE2C	1632	-	CHH	CTCAC	NA	0	0	1
UBE2C	1634	-	CHH	GGCTC	NA	0	0	1
UBE2C	1635	+	CHH	AGCCA	0.004	1086	276649	1
UBE2C	1636	+	CHH	GCCAC	0.01	2859	274641	1
UBE2C	1638	+	CHG	CACTG	0.006	1550	275836	1
UBE2C	1640	-	CHG	CGCAG	NA	0	0	1
UBE2C	1641	+	CG	TGCGA	0.951	263969	13463	0
UBE2C	1642	-	CG	GTCGC	NA	0	0	1
UBE2C	1644	+	CHH	GACCA	0.006	1749	276133	1
UBE2C	1645	+	CHG	ACCAG	0.006	1730	275696	1
UBE2C	1647	-	CHG	GGCTG	NA	0	0	1
UBE2C	1648	+	CHH	AGCCT	0.007	1966	275387	1
UBE2C	1649	+	CHG	GCCTG	0.008	2249	275243	1
UBE2C	1651	-	CHG	TTCAG	NA	0	0	1
UBE2C	1654	+	CHH	AACCA	0.007	1913	275498	1
UBE2C	1655	+	CHH	ACCAA	0.006	1630	275852	1
UBE2C	1659	-	CHH	AACAT	NA	0	0	1
UBE2C	1662	-	CHH	GGCAA	NA	0	0	1
UBE2C	1663	+	CHH	TGCCT	0.008	2130	275021	1
UBE2C	1664	+	CHH	GCCTT	0.006	1551	275625	1
UBE2C	1676	+	CHG	TTCTG	0.006	1590	275722	1
UBE2C	1678	-	CHG	GACAG	NA	0	0	1
UBE2C	1680	+	CHH	GTCAT	0.005	1498	274682	1
UBE2C	1683	+	CHH	ATCTC	0.005	1423	275631	1
UBE2C	1685	+	CHG	CTCTG	0.004	1164	275860	1
UBE2C	1687	-	CHG	CGCAG	NA	0	0	1
UBE2C	1688	+	CG	TGCGG	0.895	245241	28893	0
UBE2C	1689	-	CG	TCCGC	NA	0	0	1
UBE2C	1690	-	CHG	CTCCG	NA	0	0	1
UBE2C	1692	-	CHH	ATCTC	NA	0	0	1
UBE2C	1695	-	CHH	TACAT	NA	0	0	1
UBE2C	1699	-	CHH	TCCAT	NA	0	0	1
UBE2C	1700	-	CHH	GTCCA	NA	0	0	1
UBE2C	1702	+	CHH	GACCT	0.003	728	272141	1
UBE2C	1703	+	CHH	ACCTA	0.002	672	272152	1
UBE2C	1707	-	CHH	AACAT	NA	0	0	1
UBE2C	1712	+	CHH	TTCTA	0.002	500	272185	1
UBE2C	1718	-	CHH	CCCTA	NA	0	0	1
UBE2C	1719	-	CHH	TCCCT	NA	0	0	1
UBE2C	1720	-	CHH	CTCCC	NA	0	0	1
UBE2C	1722	-	CHH	GGCTC	NA	0	0	1
UBE2C	1723	+	CHH	AGCCT	NA	0	0	1
UBE2C	1724	+	CHG	GCCTG	NA	0	0	1
UBE2C	1726	-	CHG	AGCAG	NA	0	0	1
UBE2C	1727	+	CHG	TGCTG	NA	0	0	1
UBE2C	1729	-	CHG	AGCAG	NA	0	0	1
UBE2C	1730	+	CHH	TGCTC	NA	0	0	1
UBE2C	1732	+	CHG	CTCTG	NA	0	0	1
UBE2C	1734	-	CHG	GCCAG	NA	0	0	1
UBE2C	1735	-	CHH	GGCCA	NA	0	0	1
UBE2C	1736	+	CHH	GGCCA	NA	0	0	1
UBE2C	1737	+	CHH	GCCAT	NA	0	0	1
UBE2C	1740	+	CHG	ATCAG	0	0	5	1
UBE2C	1742	-	CHG	GGCTG	NA	0	0	1
UBE2C	1743	+	CHH	AGCCT	NA	0	0	1
UBE2C	1744	+	CHH	GCCTT	0	0	2	1
UBE2C	1749	-	CHH	AACTA	NA	0	0	1
UBE2C	1755	+	CHH	TTCCC	0	0	5	1
UBE2C	1756	+	CHH	TCCCC	0	0	5	1
UBE2C	1757	+	CHH	CCCCT	0	0	5	1
UBE2C	1758	+	CHH	CCCTC	0	0	5	1
UBE2C	1760	+	CG	CTCGC	0	0	3	1
UBE2C	1761	-	CG	AGCGA	NA	0	0	1
UBE2C	1762	+	CHG	CGCTG	0	0	5	1
UBE2C	1764	-	CHG	CCCAG	NA	0	0	1
UBE2C	1765	-	CHH	TCCCA	NA	0	0	1
UBE2C	1766	-	CHH	ATCCC	NA	0	0	1
UBE2C	1772	+	CHG	TTCAG	0	0	5	1
UBE2C	1774	-	CHG	ATCTG	NA	0	0	1
UBE2C	1778	+	CHH	TACTT	0.001	346	490352	1
UBE2C	1782	-	CHH	TCCTA	NA	0	0	1
UBE2C	1783	-	CHH	GTCCT	NA	0	0	1
UBE2C	1785	+	CG	GACGC	0.31	303868	676960	0
UBE2C	1786	-	CG	TGCGT	NA	0	0	1
UBE2C	1787	+	CHG	CGCAG	0.001	454	500198	1
UBE2C	1789	-	CHG	TGCTG	NA	0	0	1
UBE2C	1790	+	CHH	AGCAA	0	224	502698	1
UBE2C	1794	-	CHH	ACCTT	NA	0	0	1
UBE2C	1795	-	CHH	CACCT	NA	0	0	1
UBE2C	1797	-	CHH	GGCAC	NA	0	0	1
UBE2C	1798	+	CHH	TGCCC	0.001	473	505486	1
UBE2C	1799	+	CHH	GCCCA	0.001	363	506117	1
UBE2C	1800	+	CHG	CCCAG	0.001	258	505795	1
UBE2C	1802	-	CHG	GCCTG	NA	0	0	1
UBE2C	1803	-	CHH	CGCCT	NA	0	0	1
UBE2C	1804	+	CG	GGCGA	0.58	293302	212304	0
UBE2C	1805	-	CG	ATCGC	NA	0	0	1
UBE2C	1814	-	CHH	ACCAT	NA	0	0	1
UBE2C	1815	-	CHH	CACCA	NA	0	0	1
UBE2C	1817	-	CHH	CCCAC	NA	0	0	1
UBE2C	1818	-	CHH	TCCCA	NA	0	0	1
UBE2C	1819	-	CHH	CTCCC	NA	0	0	1
UBE2C	1821	-	CHH	CCCTC	NA	0	0	1
UBE2C	1822	-	CHH	ACCCT	NA	0	0	1
UBE2C	1823	-	CHH	TACCC	NA	0	0	1
UBE2C	1826	+	CHH	TACCA	0.005	2477	503946	1
UBE2C	1827	+	CHG	ACCAG	0.007	3294	502670	1
UBE2C	1829	-	CHG	CACTG	NA	0	0	1
UBE2C	1831	-	CHH	AGCAC	NA	0	0	1
UBE2C	1832	+	CHG	TGCTG	0.005	2739	503185	1
UBE2C	1834	-	CHG	TGCAG	NA	0	0	1
UBE2C	1835	+	CHG	TGCAG	0.007	3350	502502	1
UBE2C	1837	-	CHG	TCCTG	NA	0	0	1
UBE2C	1838	-	CHH	ATCCT	NA	0	0	1
UBE2C	1842	-	CHH	TCCAA	NA	0	0	1
UBE2C	1843	-	CHH	CTCCA	NA	0	0	1
UBE2C	1845	-	CHH	GCCTC	NA	0	0	1
UBE2C	1846	-	CHH	TGCCT	NA	0	0	1
UBE2C	1847	+	CHH	GGCAC	0.006	3172	503410	1
UBE2C	1849	+	CHH	CACTC	0.005	2495	504033	1
UBE2C	1851	+	CHH	CTCCC	0.006	2955	503480	1
UBE2C	1852	+	CHH	TCCCT	0.004	1804	504619	1
UBE2C	1853	+	CHG	CCCTG	0.005	2607	503770	1
UBE2C	1855	-	CHG	GGCAG	NA	0	0	1
UBE2C	1856	+	CHH	TGCCC	0.007	3731	502515	1
UBE2C	1857	+	CHG	GCCCG	0.009	4786	501601	1
UBE2C	1858	+	CG	CCCGA	0.067	34125	472191	0.0105913
UBE2C	1859	-	CG	CTCGG	NA	0	0	1
UBE2C	1861	-	CHH	CCCTC	NA	0	0	1
UBE2C	1862	-	CHH	TCCCT	NA	0	0	1
UBE2C	1863	-	CHH	TTCCC	NA	0	0	1
UBE2C	1869	-	CHH	TCCAA	NA	0	0	1
UBE2C	1870	-	CHH	ATCCA	NA	0	0	1
UBE2C	1873	+	CHH	ATCAA	0.006	2836	503202	1
UBE2C	1876	-	CHH	GCCTT	NA	0	0	1
UBE2C	1877	-	CHH	AGCCT	NA	0	0	1
UBE2C	1878	+	CHG	GGCTG	0.005	2304	504114	1
UBE2C	1880	-	CHG	CCCAG	NA	0	0	1
UBE2C	1881	-	CHH	GCCCA	NA	0	0	1
UBE2C	1882	-	CHH	CGCCC	NA	0	0	1
UBE2C	1883	+	CG	GGCGT	0.115	58437	447985	2.88273e-16
UBE2C	1884	-	CG	CACGC	NA	0	0	1
UBE2C	1886	-	CHH	GGCAC	NA	0	0	1
UBE2C	1887	+	CHG	TGCCG	0.008	3965	502609	1
UBE2C	1888	+	CG	GCCGA	0.053	26745	479703	0.405816
UBE2C	1889	-	CG	CTCGG	NA	0	0	1
UBE2C	1891	-	CHH	CACTC	NA	0	0	1
UBE2C	1893	-	CHH	AACAC	NA	0	0	1
UBE2C	1896	+	CHH	TTCCC	0.006	2814	503743	1
UBE2C	1897	+	CHH	TCCCA	0.008	4171	502280	1
UBE2C	1898	+	CHH	CCCAC	0.009	4679	501932	1
UBE2C	1900	+	CG	CACGC	0.032	16330	490161	0.997804
UBE2C	1901	-	CG	CGCGT	NA	0	0	1
UBE2C	1902	+	CG	CGCGG	0.086	43395	462817	2.14885e-06
UBE2C	1903	-	CG	TCCGC	NA	0	0	1
UBE2C	1904	-	CHG	CTCCG	NA	0	0	1
UBE2C	1906	-	CHH	TACTC	NA	0	0	1
UBE2C	1910	-	CHH	GTCTT	NA	0	0	1
UBE2C	1912	+	CG	GACGT	0.281	142170	364058	0
UBE2C	1913	-	CG	CACGT	NA	0	0	1
UBE2C	1915	-	CHH	TACAC	NA	0	0	1
UBE2C	1918	-	CHH	GGCTA	NA	0	0	1
UBE2C	1919	+	CHH	AGCCA	0.003	1293	505178	1
UBE2C	1920	+	CHG	GCCAG	0.002	952	504359	1
UBE2C	1922	-	CHG	TTCTG	NA	0	0	1
UBE2C	1925	-	CHH	TCCTT	NA	0	0	1
UBE2C	1926	-	CHH	CTCCT	NA	0	0	1
UBE2C	1928	-	CHH	CCCTC	NA	0	0	1
UBE2C	1929	-	CHH	CCCCT	NA	0	0	1
UBE2C	1930	-	CHH	ACCCC	NA	0	0	1
UBE2C	1931	-	CHH	AACCC	NA	0	0	1
UBE2C	1934	+	CHH	TTCAT	0	0	10	1
UBE2C	1937	+	CHH	ATCCC	0	0	10	1
UBE2C	1938	+	CHH	TCCCA	0	0	10	1
UBE2C	1939	+	CHH	CCCAC	0	0	10	1
UBE2C	1941	+	CG	CACGT	0	0	10	1
UBE2C	1942	-	CG	CACGT	NA	0	0	1
UBE2C	1944	-	CHH	TCCAC	NA	0	0	1
UBE2C	1945	-	CHH	GTCCA	NA	0	0	1
UBE2C	1947	+	CG	GACGT	0	0	10	1
UBE2C	1948	-	CG	AACGT	NA	0	0	1
UBE2C	1953	+	CHH	TTCTT	0	0	10	1
UBE2C	1956	-	CHH	GCCAA	NA	0	0	1
UBE2C	1957	-	CHH	GGCCA	NA	0	0	1
UBE2C	1958	+	CHH	GGCCC	0	0	10	1
UBE2C	1959	+	CHH	GCCCT	0	0	10	1
UBE2C	1960	+	CHH	CCCTT	0	0	10	1
UBE2C	1967	-	CHH	ACCAT	NA	0	0	1
UBE2C	1968	-	CHH	AACCA	NA	0	0	1
UBE2C	1972	-	CHH	CGCTA	NA	0	0	1
UBE2C	1973	+	CG	AGCGT	0	0	4	1
UBE2C	1974	-	CG	AACGC	NA	0	0	1
UBE2C	1979	+	CHH	TTCCA	0	0	4	1
UBE2C	1980	+	CHH	TCCAA	0	0	4	1
UBE2C	1983	+	CG	AACGG	0	0	4	1
UBE2C	1984	-	CG	GCCGT	NA	0	0	1
UBE2C	1985	-	CHG	GGCCG	NA	0	0	1
UBE2C	1986	+	CHH	GGCCA	0	0	1	1
UBE2C	1987	+	CHH	GCCAC	0	0	1	1
UBE2C	1989	+	CHH	CACCA	0	0	1	1
UBE2C	1990	+	CHH	ACCAA	0	0	1	1
UBE2C	1995	+	CG	TTCGC	0	0	1	1
UBE2C	1996	-	CG	AGCGA	NA	0	0	1
UBE2C	1997	+	CHH	CGCTA	0	0	1	1
UBE2C	2000	+	CG	TACGG	0	0	1	1
UBE2C	2001	-	CG	TCCGT	NA	0	0	1
UBE2C	2002	-	CHG	ATCCG	NA	0	0	1
UBE2C	2006	+	CG	TTCGT	0	0	1	1
UBE2C	2007	-	CG	AACGA	NA	0	0	1
UBE2C	2011	-	CHH	AACTA	NA	0	0	1
UBE2C	2017	-	CHH	GCCAT	NA	0	0	1
UBE2C	2018	-	CHH	TGCCA	NA	0	0	1
UBE2C	2019	+	CHG	GGCAG	NA	0	0	1
UBE2C	2021	-	CHG	TGCTG	NA	0	0	1
UBE2C	2022	+	CHH	AGCAT	NA	0	0	1
UBE2C	2025	+	CHH	ATCAT	NA	0	0	1
UBE2C	2028	+	CHH	ATCTA	NA	0	0	1
UBE2C	2031	+	CHH	TACCA	NA	0	0	1
UBE2C	2032	+	CHH	ACCAA	NA	0	0	1
UBE2C	2036	+	CG	ATCGG	NA	0	0	1
UBE2C	2037	-	CG	ACCGA	NA	0	0	1
UBE2C	2038	-	CHG	AACCG	NA	0	0	1
UBE2C	2041	-	CHH	GACAA	NA	0	0	1
UBE2C	2043	+	CHG	GTCAG	NA	0	0	1
UBE2C	2045	-	CHG	TTCTG	NA	0	0	1
UBE2C	2048	-	CHH	CGCTT	NA	0	0	1
UBE2C	2049	+	CG	AGCGG	NA	0	0	1
UBE2C	2050	-	CG	CCCGC	NA	0	0	1
UBE2C	2051	-	CHG	TCCCG	NA	0	0	1
UBE2C	2052	-	CHH	ATCCC	NA	0	0	1
UBE2C	2056	+	CHG	TTCTG	NA	0	0	1
UBE2C	2058	-	CHG	GGCAG	NA	0	0	1
UBE2C	2059	+	CHG	TGCCG	NA	0	0	1
UBE2C	2060	+	CG	GCCGC	NA	0	0	1
UBE2C	2061	-	CG	GGCGG	NA	0	0	1
UBE2C	2062	+	CHH	CGCCC	NA	0	0	1
UBE2C	2063	+	CHH	GCCCA	NA	0	0	1
UBE2C	2064	+	CHH	CCCAA	NA	0	0	1
UBE2C	2069	-	CHH	CGCTA	NA	0	0	1
UBE2C	2070	+	CG	AGCGG	NA	0	0	1
UBE2C	2071	-	CG	ACCGC	NA	0	0	1
UBE2C	2072	-	CHG	CACCG	NA	0	0	1
UBE2C	2074	-	CHH	CGCAC	NA	0	0	1
UBE2C	2075	+	CG	TGCGC	NA	0	0	1
UBE2C	2076	-	CG	GGCGC	NA	0	0	1
UBE2C	2077	+	CHH	CGCCA	NA	0	0	1
UBE2C	2078	+	CHG	GCCAG	NA	0	0	1
UBE2C	2080	-	CHG	CACTG	NA	0	0	1
UBE2C	2082	-	CHH	CCCAC	NA	0	0	1
UBE2C	2083	-	CHH	ACCCA	NA	0	0	1
UBE2C	2084	-	CHH	TACCC	NA	0	0	1
UBE2C	2087	-	CHH	ACCTA	NA	0	0	1
UBE2C	2088	-	CHH	GACCT	NA	0	0	1
UBE2C	2090	+	CHH	GTCTA	NA	0	0	1
UBE2C	2093	-	CHH	TGCTA	NA	0	0	1
UBE2C	2094	+	CHG	AGCAG	NA	0	0	1
UBE2C	2096	-	CHG	CACTG	NA	0	0	1
UBE2C	2098	-	CHH	GCCAC	NA	0	0	1
UBE2C	2099	-	CHH	CGCCA	NA	0	0	1
UBE2C	2100	+	CG	GGCGC	NA	0	0	1
UBE2C	2101	-	CG	TGCGC	NA	0	0	1
UBE2C	2102	+	CHG	CGCAG	NA	0	0	1
UBE2C	2104	-	CHG	TGCTG	NA	0	0	1
UBE2C	2105	+	CHH	AGCAA	NA	0	0	1
UBE2C	2110	-	CHH	CTCTA	NA	0	0	1
UBE2C	2112	-	CHH	CGCTC	NA	0	0	1
UBE2C	2113	+	CG	AGCGC	NA	0	0	1
UBE2C	2114	-	CG	AGCGC	NA	0	0	1
UBE2C	2115	+	CHH	CGCTC	NA	0	0	1
UBE2C	2117	+	CHG	CTCCG	NA	0	0	1
UBE2C	2118	+	CG	TCCGG	NA	0	0	1
UBE2C	2119	-	CG	TCCGG	NA	0	0	1
UBE2C	2120	-	CHG	CTCCG	NA	0	0	1
UBE2C	2122	-	CHH	CGCTC	NA	0	0	1
UBE2C	2123	+	CG	AGCGT	NA	0	0	1
UBE2C	2124	-	CG	GACGC	NA	0	0	1
UBE2C	2126	+	CHH	GTCTC	NA	0	0	1
UBE2C	2128	+	CHH	CTCAT	NA	0	0	1
UBE2C	2132	-	CHH	GCCAA	NA	0	0	1
UBE2C	2133	-	CHH	AGCCA	NA	0	0	1
UBE2C	2134	+	CHG	GGCTG	0.001	102	134857	1
UBE2C	2136	-	CHG	TCCAG	NA	0	0	1
UBE2C	2137	-	CHH	ATCCA	NA	0	0	1
UBE2C	2140	+	CHH	ATCAA	0	60	137087	1
UBE2C	2144	+	CHH	AACCC	0	54	135996	1
UBE2C	2145	+	CHH	ACCCA	0.001	75	137218	1
UBE2C	2146	+	CHH	CCCAA	0	41	137216	1
UBE2C	2149	-	CHH	CGCTT	NA	0	0	1
UBE2C	2150	+	CG	AGCGA	0.3	41014	95750	0
UBE2C	2151	-	CG	CTCGC	NA	0	0	1
UBE2C	2153	-	CHH	GGCTC	NA	0	0	1
UBE2C	2154	+	CHH	AGCCA	0.001	91	137006	1
UBE2C	2155	+	CHH	GCCAT	0	67	137245	1
UBE2C	2159	-	CHH	ATCAA	NA	0	0	1
UBE2C	2163	-	CHH	ACCAA	NA	0	0	1
UBE2C	2164	-	CHH	GACCA	NA	0	0	1
UBE2C	2166	+	CG	GTCGA	0.009	1259	135938	1
UBE2C	2167	-	CG	GTCGA	NA	0	0	1
UBE2C	2169	+	CG	GACGC	0.007	964	136047	1
UBE2C	2170	-	CG	GGCGT	NA	0	0	1
UBE2C	2171	+	CHH	CGCCC	0.005	630	136460	1
UBE2C	2172	+	CHH	GCCCC	0.005	689	136387	1
UBE2C	2173	+	CHH	CCCCC	0.003	402	136688	1
UBE2C	2174	+	CHH	CCCCA	0.005	685	136404	1
UBE2C	2175	+	CHG	CCCAG	0.004	525	136557	1
UBE2C	2177	-	CHG	CTCTG	NA	0	0	1
UBE2C	2179	-	CHH	CCCTC	NA	0	0	1
UBE2C	2180	-	CHH	ACCCT	NA	0	0	1
UBE2C	2181	-	CHH	AACCC	NA	0	0	1
UBE2C	2185	+	CHH	TACAA	0.003	356	136559	1
UBE2C	2190	+	CHH	TTCAA	0.002	328	136567	1
UBE2C	2194	+	CG	AACGC	0.009	1289	135537	1
UBE2C	2195	-	CG	CGCGT	NA	0	0	1
UBE2C	2196	+	CG	CGCGG	0.009	1290	135466	1
UBE2C	2197	-	CG	CCCGC	NA	0	0	1
UBE2C	2198	-	CHG	GCCCG	NA	0	0	1
UBE2C	2199	-	CHH	CGCCC	NA	0	0	1
UBE2C	2200	+	CG	GGCGG	0.009	1169	135472	1
UBE2C	2201	-	CG	CCCGC	NA	0	0	1
UBE2C	2202	-	CHG	GCCCG	NA	0	0	1
UBE2C	2203	-	CHH	CGCCC	NA	0	0	1
UBE2C	2204	+	CG	GGCGG	0.009	1197	135288	1
UBE2C	2205	-	CG	CCCGC	NA	0	0	1
UBE2C	2206	-	CHG	GCCCG	NA	0	0	1
UBE2C	2207	-	CHH	GGCCC	NA	0	0	1
UBE2C	2208	+	CHH	GGCCC	0.008	1113	135173	1
UBE2C	2209	+	CHG	GCCCG	0.008	1024	135040	1
UBE2C	2210	+	CG	CCCGC	0.008	1130	135304	1
UBE2C	2211	-	CG	TGCGG	NA	0	0	1
UBE2C	2212	+	CHG	CGCAG	0.007	905	135361	1
UBE2C	2214	-	CHG	GACTG	NA	0	0	1
UBE2C	2216	+	CHH	GTCCT	0.003	448	135680	1
UBE2C	2217	+	CHG	TCCTG	0.006	833	135416	1
UBE2C	2219	-	CHG	TGCAG	NA	0	0	1
UBE2C	2220	+	CHG	TGCAG	0.005	717	135566	1
UBE2C	2222	-	CHG	AACTG	NA	0	0	1
UBE2C	2225	-	CHH	TGCAA	NA	0	0	1
UBE2C	2226	+	CHG	TGCAG	0.004	480	135593	1
UBE2C	2228	-	CHG	GACTG	NA	0	0	1
UBE2C	2230	+	CG	GTCGT	0.007	1004	134818	1
UBE2C	2231	-	CG	CACGA	NA	0	0	1
UBE2C	2233	-	CHH	AACAC	NA	0	0	1
UBE2C	2236	+	CHH	TTCTC	0.009	1212	134577	1
UBE2C	2238	+	CHG	CTCCG	0.007	919	134799	1
UBE2C	2239	+	CG	TCCGA	0.006	872	134906	1
UBE2C	2240	-	CG	CTCGG	NA	0	0	1
UBE2C	2242	-	CHH	AACTC	NA	0	0	1
UBE2C	2245	+	CHH	TTCCT	0.005	632	138721	1
UBE2C	2246	+	CHG	TCCTG	0.003	389	138201	1
UBE2C	2248	-	CHG	GACAG	NA	0	0	1
UBE2C	2250	+	CHH	GTCTC	0.004	571	138916	1
UBE2C	2252	+	CHH	CTCTC	0.005	688	138814	1
UBE2C	2254	+	CHG	CTCTG	0.004	588	137765	1
UBE2C	2256	-	CHG	GGCAG	NA	0	0	1
UBE2C	2257	+	CHH	TGCCA	0.006	848	138620	1
UBE2C	2258	+	CHH	GCCAA	0.008	1085	137812	1
UBE2C	2261	+	CG	AACGC	0.005	761	138774	1
UBE2C	2262	-	CG	GGCGT	NA	0	0	1
UBE2C	2263	+	CHG	CGCCG	0.007	1012	137418	1
UBE2C	2264	+	CG	GCCGC	0.007	1006	138647	1
UBE2C	2265	-	CG	GGCGG	NA	0	0	1
UBE2C	2266	+	CHH	CGCCC	0.004	500	138923	1
UBE2C	2267	+	CHG	GCCCG	0.004	527	138531	1
UBE2C	2268	+	CG	CCCGG	0.009	1262	137807	1
UBE2C	2269	-	CG	TCCGG	NA	0	0	1
UBE2C	2270	-	CHG	ATCCG	NA	0	0	1
UBE2C	2273	-	CHH	GCCAT	NA	0	0	1
UBE2C	2274	-	CHH	AGCCA	NA	0	0	1
UBE2C	2275	+	CHH	GGCTT	0.005	749	138910	1
UBE2C	2278	+	CHH	TTCCC	0.003	428	134536	1
UBE2C	2279	+	CHH	TCCCA	0.004	501	134303	1
UBE2C	2280	+	CHH	CCCAA	0.004	546	134264	1
UBE2C	2285	+	CHG	AACCG	0.009	1207	133595	1
UBE2C	2286	+	CG	ACCGC	0.008	1143	133964	1
UBE2C	2287	-	CG	CGCGG	NA	0	0	1
UBE2C	2288	+	CG	CGCGA	0.008	1110	134041	1
UBE2C	2289	-	CG	GTCGC	NA	0	0	1
UBE2C	2291	+	CHH	GACCC	0.005	664	134503	1
UBE2C	2292	+	CHH	ACCCA	0.005	636	134487	1
UBE2C	2293	+	CHG	CCCAG	0.002	324	134435	1
UBE2C	2295	-	CHG	GGCTG	NA	0	0	1
UBE2C	2296	+	CHG	AGCCG	0.006	869	134305	1
UBE2C	2297	+	CG	GCCGC	0.016	2108	133058	1
UBE2C	2298	-	CG	GGCGG	NA	0	0	1
UBE2C	2299	+	CHH	CGCCA	0.004	555	134537	1
UBE2C	2300	+	CHH	GCCAC	0.007	891	134290	1
UBE2C	2302	+	CHH	CACTA	0.005	696	134525	1
UBE2C	2305	-	CHH	CGCTA	NA	0	0	1
UBE2C	2306	+	CG	AGCGT	0.006	804	134556	1
UBE2C	2307	-	CG	GACGC	NA	0	0	1
UBE2C	2309	+	CG	GTCGC	0.01	1312	134088	1
UBE2C	2310	-	CG	GGCGA	NA	0	0	1
UBE2C	2311	+	CHG	CGCCG	0.01	1310	133969	1
UBE2C	2312	+	CG	GCCGC	0.009	1250	134083	1
UBE2C	2313	-	CG	GGCGG	NA	0	0	1
UBE2C	2314	+	CHG	CGCCG	0.007	908	134268	1
UBE2C	2315	+	CG	GCCGC	0.013	1740	133693	1
UBE2C	2316	-	CG	GGCGG	NA	0	0	1
UBE2C	2317	+	CHH	CGCCC	0.005	719	134712	1
UBE2C	2318	+	CHG	GCCCG	0.006	822	134581	1
UBE2C	2319	+	CG	CCCGT	0.011	1459	133976	1
UBE2C	2320	-	CG	TACGG	NA	0	0	1
UBE2C	2325	-	CHH	TCCTT	NA	0	0	1
UBE2C	2326	-	CHH	CTCCT	NA	0	0	1
UBE2C	2328	-	CHH	AGCTC	NA	0	0	1
UBE2C	2329	+	CHG	AGCTG	0.004	577	135037	1
UBE2C	2331	-	CHG	CTCAG	NA	0	0	1
UBE2C	2333	-	CHH	GGCTC	NA	0	0	1
UBE2C	2334	+	CHG	AGCCG	0.005	629	134313	1
UBE2C	2335	+	CG	GCCGA	0.007	1007	134171	1
UBE2C	2336	-	CG	CTCGG	NA	0	0	1
UBE2C	2338	-	CHH	CGCTC	NA	0	0	1
UBE2C	2339	+	CG	AGCGG	0.013	1624	126903	1
UBE2C	2340	-	CG	CCCGC	NA	0	0	1
UBE2C	2341	-	CHG	CCCCG	NA	0	0	1
UBE2C	2342	-	CHH	CCCCC	NA	0	0	1
UBE2C	2343	-	CHH	GCCCC	NA	0	0	1
UBE2C	2344	-	CHH	CGCCC	NA	0	0	1
UBE2C	2345	+	CG	GGCGC	0.015	1976	133564	1
UBE2C	2346	-	CG	GGCGC	NA	0	0	1
UBE2C	2347	+	CHG	CGCCG	0.005	687	135564	1
UBE2C	2348	+	CG	GCCGC	0.007	969	135956	1
UBE2C	2349	-	CG	GGCGG	NA	0	0	1
UBE2C	2350	+	CHH	CGCCC	0.005	670	136266	1
UBE2C	2351	+	CHG	GCCCG	0.005	728	136273	1
UBE2C	2352	+	CG	CCCGG	0.006	853	136088	1
UBE2C	2353	-	CG	CCCGG	NA	0	0	1
UBE2C	2354	-	CHG	CCCCG	NA	0	0	1
UBE2C	2355	-	CHH	ACCCC	NA	0	0	1
UBE2C	2356	-	CHH	GACCC	NA	0	0	1
UBE2C	2358	+	CHG	GTCCG	0.004	583	136413	1
UBE2C	2359	+	CG	TCCGG	0.013	1847	135091	1
UBE2C	2360	-	CG	ACCGG	NA	0	0	1
UBE2C	2361	-	CHG	CACCG	NA	0	0	1
UBE2C	2363	-	CHH	CCCAC	NA	0	0	1
UBE2C	2364	-	CHH	GCCCA	NA	0	0	1
UBE2C	2365	-	CHH	TGCCC	NA	0	0	1
UBE2C	2366	+	CHH	GGCAA	0.002	243	136789	1
UBE2C	2371	-	CHH	ACCTT	NA	0	0	1
UBE2C	2372	-	CHH	CACCT	NA	0	0	1
UBE2C	2374	-	CHH	CTCAC	NA	0	0	1
UBE2C	2376	-	CHH	CACTC	NA	0	0	1
UBE2C	2378	-	CHH	ATCAC	NA	0	0	1
UBE2C	2381	-	CHH	CGCAT	NA	0	0	1
UBE2C	2382	+	CG	TGCGG	0.246	33400	102609	5.97672e-96
UBE2C	2383	-	CG	GCCGC	NA	0	0	1
UBE2C	2384	-	CHG	GGCCG	NA	0	0	1
UBE2C	2385	+	CHH	GGCCT	0	0	109	1
UBE2C	2386	+	CHH	GCCTA	0	0	9	1
UBE2C	2389	+	CHH	TACCA	NA	0	0	1
UBE2C	2390	+	CHH	ACCAC	NA	0	0	1
UBE2C	2392	+	CHH	CACTC	NA	0	0	1
UBE2C	2394	+	CG	CTCGC	NA	0	0	1
UBE2C	2395	-	CG	GGCGA	NA	0	0	1
UBE2C	2396	+	CHG	CGCCG	NA	0	0	1
UBE2C	2397	+	CG	GCCGG	NA	0	0	1
UBE2C	2398	-	CG	CCCGG	NA	0	0	1
UBE2C	2399	-	CHG	GCCCG	NA	0	0	1
UBE2C	2400	-	CHH	GGCCC	NA	0	0	1
UBE2C	2401	+	CHH	GGCCT	NA	0	0	1
UBE2C	2402	+	CHG	GCCTG	NA	0	0	1
UBE2C	2404	-	CHG	GGCAG	NA	0	0	1
UBE2C	2405	+	CHH	TGCCA	NA	0	0	1
UBE2C	2406	+	CHH	GCCAT	NA	0	0	1
UBE2C	2409	-	CHH	GGCAT	NA	0	0	1
UBE2C	2410	+	CHH	TGCCC	NA	0	0	1
UBE2C	2411	+	CHH	GCCCT	NA	0	0	1
UBE2C	2412	+	CHH	CCCTA	NA	0	0	1
UBE2C	2415	-	CHH	GCCTA	NA	0	0	1
UBE2C	2416	-	CHH	TGCCT	NA	0	0	1
UBE2C	2417	+	CHH	GGCAT	NA	0	0	1
UBE2C	2421	-	CHH	ACCAA	NA	0	0	1
UBE2C	2422	-	CHH	TACCA	NA	0	0	1
UBE2C	2425	+	CHH	TACCC	NA	0	0	1
UBE2C	2426	+	CHH	ACCCA	NA	0	0	1
UBE2C	2427	+	CHG	CCCAG	0	0	9	1
UBE2C	2429	-	CHG	CTCTG	NA	0	0	1
UBE2C	2431	-	CHH	TGCTC	NA	0	0	1
UBE2C	2432	+	CHH	AGCAA	0.001	57	109570	1
UBE2C	2436	-	CHH	ATCTT	NA	0	0	1
UBE2C	2441	+	CHH	TTCTA	0	35	110445	1
UBE2C	2444	-	CHH	TCCTA	NA	0	0	1
UBE2C	2445	-	CHH	GTCCT	NA	0	0	1
UBE2C	2447	+	CHH	GACCA	0.001	76	110315	1
UBE2C	2448	+	CHH	ACCAC	0	45	110441	1
UBE2C	2450	+	CHH	CACCC	0.001	75	110394	1
UBE2C	2451	+	CHH	ACCCC	0.001	68	110387	1
UBE2C	2452	+	CHH	CCCCC	0.001	89	110379	1
UBE2C	2453	+	CHH	CCCCC	0.001	118	110361	1
UBE2C	2454	+	CHG	CCCCG	0	45	110428	1
UBE2C	2455	+	CG	CCCGC	0.514	56756	53689	0
UBE2C	2456	-	CG	GGCGG	NA	0	0	1
UBE2C	2457	+	CHG	CGCCG	0.001	84	110343	1
UBE2C	2458	+	CG	GCCGC	0.534	58957	51407	0
UBE2C	2459	-	CG	GGCGG	NA	0	0	1
UBE2C	2460	+	CHH	CGCCA	0.001	94	110304	1
UBE2C	2461	+	CHH	GCCAC	0	49	110209	1
UBE2C	2463	+	CHH	CACCT	0.001	81	110250	1
UBE2C	2464	+	CHH	ACCTC	0.001	75	110324	1
UBE2C	2466	+	CHH	CTCCT	0.001	71	110337	1
UBE2C	2467	+	CHG	TCCTG	0.004	431	109910	1
UBE2C	2469	-	CHG	TCCAG	NA	0	0	1
UBE2C	2470	-	CHH	CTCCA	NA	0	0	1
UBE2C	2472	-	CHH	CGCTC	NA	0	0	1
UBE2C	2473	+	CG	AGCGG	0.01	1151	108706	1
UBE2C	2474	-	CG	CCCGC	NA	0	0	1
UBE2C	2475	-	CHG	TCCCG	NA	0	0	1
UBE2C	2476	-	CHH	CTCCC	NA	0	0	1
UBE2C	2478	-	CHH	ATCTC	NA	0	0	1
UBE2C	2481	+	CHG	ATCTG	0.006	661	109030	1
UBE2C	2483	-	CHG	CGCAG	NA	0	0	1
UBE2C	2484	+	CG	TGCGG	0.006	652	108986	1
UBE2C	2485	-	CG	CCCGC	NA	0	0	1
UBE2C	2486	-	CHG	ACCCG	NA	0	0	1
UBE2C	2487	-	CHH	CACCC	NA	0	0	1
UBE2C	2489	-	CHH	TGCAC	NA	0	0	1
UBE2C	2490	+	CHG	TGCAG	0.008	868	108406	1
UBE2C	2492	-	CHG	TCCTG	NA	0	0	1
UBE2C	2493	-	CHH	CTCCT	NA	0	0	1
UBE2C	2495	-	CHH	TTCTC	NA	0	0	1
UBE2C	2498	+	CHH	AACAC	0.006	699	108447	1
UBE2C	2500	+	CHH	CACAC	0.005	536	108598	1
UBE2C	2502	+	CHH	CACCA	0.004	424	108644	1
UBE2C	2503	+	CHG	ACCAG	0.01	1048	108141	1
UBE2C	2505	-	CHG	TCCTG	NA	0	0	1
UBE2C	2506	-	CHH	CTCCT	NA	0	0	1
UBE2C	2508	-	CHH	AGCTC	NA	0	0	1
UBE2C	2509	+	CHH	AGCTC	0.006	721	111551	1
UBE2C	2511	+	CG	CTCGG	0.011	1308	112626	1
UBE2C	2512	-	CG	CCCGA	NA	0	0	1
UBE2C	2513	-	CHG	CCCCG	NA	0	0	1
UBE2C	2514	-	CHH	GCCCC	NA	0	0	1
UBE2C	2515	-	CHH	GGCCC	NA	0	0	1
UBE2C	2516	+	CHH	GGCCT	0.003	393	111997	1
UBE2C	2517	+	CHG	GCCTG	0.005	592	113717	1
UBE2C	2519	-	CHG	GCCAG	NA	0	0	1
UBE2C	2520	-	CHH	TGCCA	NA	0	0	1
UBE2C	2521	+	CHH	GGCAT	0.006	667	111469	1
UBE2C	2525	+	CHH	TTCCC	0.005	534	113951	1
UBE2C	2526	+	CHH	TCCCC	0.006	656	113782	1
UBE2C	2527	+	CHH	CCCCT	0.004	425	113949	1
UBE2C	2528	+	CHG	CCCTG	0.008	881	112982	1
UBE2C	2530	-	CHG	CCCAG	NA	0	0	1
UBE2C	2531	-	CHH	GCCCA	NA	0	0	1
UBE2C	2532	-	CHH	TGCCC	NA	0	0	1
UBE2C	2533	+	CHH	GGCAT	0.007	809	113438	1
UBE2C	2536	-	CHH	CCCAT	NA	0	0	1
UBE2C	2537	-	CHH	ACCCA	NA	0	0	1
UBE2C	2538	-	CHH	CACCC	NA	0	0	1
UBE2C	2540	-	CHH	GACAC	NA	0	0	1
UBE2C	2542	+	CG	GTCGA	0.007	854	113597	1
UBE2C	2543	-	CG	CTCGA	NA	0	0	1
UBE2C	2545	-	CHH	CCCTC	NA	0	0	1
UBE2C	2546	-	CHH	GCCCT	NA	0	0	1
UBE2C	2547	-	CHH	CGCCC	NA	0	0	1
UBE2C	2548	+	CG	GGCGG	0.009	1024	113511	1
UBE2C	2549	-	CG	TCCGC	NA	0	0	1
UBE2C	2550	-	CHG	CTCCG	NA	0	0	1
UBE2C	2552	-	CHH	GTCTC	NA	0	0	1
UBE2C	2554	+	CHH	GACTT	0.004	448	114288	1
UBE2C	2557	+	CHG	TTCCG	0.004	455	113887	1
UBE2C	2558	+	CG	TCCGG	0.009	1035	113351	1
UBE2C	2559	-	CG	CCCGG	NA	0	0	1
UBE2C	2560	-	CHG	TCCCG	NA	0	0	1
UBE2C	2561	-	CHH	GTCCC	NA	0	0	1
UBE2C	2563	+	CHH	GACTC	0.004	420	114253	1
UBE2C	2565	+	CHH	CTCCC	0.004	489	113998	1
UBE2C	2566	+	CHH	TCCCA	0.003	394	114232	1
UBE2C	2567	+	CHH	CCCAC	0.006	672	113515	1
UBE2C	2569	+	CHH	CACCT	0.006	707	113879	1
UBE2C	2570	+	CHH	ACCTC	0.003	397	114247	1
UBE2C	2572	+	CHH	CTCCT	0.005	535	111120	1
UBE2C	2573	+	CHH	TCCTT	0.005	550	111048	1
UBE2C	2576	-	CHH	CGCAA	NA	0	0	1
UBE2C	2577	+	CG	TGCGC	0.01	1126	110295	1
UBE2C	2578	-	CG	CGCGC	NA	0	0	1
UBE2C	2579	+	CG	CGCGG	0.009	1022	110265	1
UBE2C	2580	-	CG	CCCGC	NA	0	0	1
UBE2C	2581	-	CHG	ACCCG	NA	0	0	1
UBE2C	2582	-	CHH	CACCC	NA	0	0	1
UBE2C	2584	-	CHH	CTCAC	NA	0	0	1
UBE2C	2586	-	CHH	ATCTC	NA	0	0	1
UBE2C	2590	+	CG	TTCGA	0.008	910	110667	1
UBE2C	2591	-	CG	CTCGA	NA	0	0	1
UBE2C	2593	-	CHH	CTCTC	NA	0	0	1
UBE2C	2595	-	CHH	ATCTC	NA	0	0	1
UBE2C	2598	-	CHH	CCCAT	NA	0	0	1
UBE2C	2599	-	CHH	CCCCA	NA	0	0	1
UBE2C	2600	-	CHH	CCCCC	NA	0	0	1
UBE2C	2601	-	CHH	TCCCC	NA	0	0	1
UBE2C	2602	-	CHH	GTCCC	NA	0	0	1
UBE2C	2604	+	CHG	GACAG	0.006	636	110154	1
UBE2C	2606	-	CHG	GCCTG	NA	0	0	1
UBE2C	2607	-	CHH	GGCCT	NA	0	0	1
UBE2C	2608	+	CHH	GGCCA	0.006	623	111206	1
UBE2C	2609	+	CHG	GCCAG	0.009	1042	110660	1
UBE2C	2611	-	CHG	TCCTG	NA	0	0	1
UBE2C	2612	-	CHH	CTCCT	NA	0	0	1
UBE2C	2614	-	CHH	AGCTC	NA	0	0	1
UBE2C	2615	+	CHH	AGCTC	0.008	850	111127	1
UBE2C	2617	+	CHG	CTCAG	0.007	731	111192	1
UBE2C	2619	-	CHG	GTCTG	NA	0	0	1
UBE2C	2621	+	CHG	GACCG	0.004	480	111545	1
UBE2C	2622	+	CG	ACCGC	0.014	1604	110396	1
UBE2C	2623	-	CG	AGCGG	NA	0	0	1
UBE2C	2624	+	CHH	CGCTC	0.003	364	111545	1
UBE2C	2626	+	CHH	CTCTT	0.003	360	111663	1
UBE2C	2630	-	CHH	CTCAA	NA	0	0	1
UBE2C	2632	-	CHH	GTCTC	NA	0	0	1
UBE2C	2634	+	CHH	GACTC	0.003	320	111682	1
UBE2C	2636	+	CHH	CTCTC	0.003	283	111735	1
UBE2C	2638	+	CHH	CTCCC	0.003	344	111663	1
UBE2C	2639	+	CHG	TCCCG	0.004	454	111540	1
UBE2C	2640	+	CG	CCCGA	0.11	12176	98322	2.4628e-14
UBE2C	2641	-	CG	TTCGG	NA	0	0	1
UBE2C	2644	-	CHH	TCCTT	NA	0	0	1
UBE2C	2645	-	CHH	CTCCT	NA	0	0	1
UBE2C	2647	-	CHH	TTCTC	NA	0	0	1
UBE2C	2651	-	CHH	CCCAT	NA	0	0	1
UBE2C	2652	-	CHH	TCCCA	NA	0	0	1
UBE2C	2653	-	CHH	CTCCC	NA	0	0	1
UBE2C	2655	-	CHH	CCCTC	NA	0	0	1
UBE2C	2656	-	CHH	ACCCT	NA	0	0	1
UBE2C	2657	-	CHH	TACCC	NA	0	0	1
UBE2C	2660	-	CHH	CCCTA	NA	0	0	1
UBE2C	2661	-	CHH	CCCCT	NA	0	0	1
UBE2C	2662	-	CHH	GCCCC	NA	0	0	1
UBE2C	2663	-	CHH	CGCCC	NA	0	0	1
UBE2C	2664	+	CG	GGCGC	NA	0	0	1
UBE2C	2665	-	CG	AGCGC	NA	0	0	1
UBE2C	2666	+	CHG	CGCTG	NA	0	0	1
UBE2C	2668	-	CHG	GGCAG	NA	0	0	1
UBE2C	2669	+	CHH	TGCCA	NA	0	0	1
UBE2C	2670	+	CHG	GCCAG	NA	0	0	1
UBE2C	2672	-	CHG	GTCTG	NA	0	0	1
UBE2C	2674	+	CHH	GACTC	NA	0	0	1
UBE2C	2676	+	CHH	CTCCT	NA	0	0	1
UBE2C	2677	+	CHH	TCCTT	NA	0	0	1
UBE2C	2680	+	CHH	TTCCC	NA	0	0	1
UBE2C	2681	+	CHH	TCCCT	NA	0	0	1
UBE2C	2682	+	CHG	CCCTG	NA	0	0	1
UBE2C	2684	-	CHG	ACCAG	NA	0	0	1
UBE2C	2685	-	CHH	CACCA	NA	0	0	1
UBE2C	2687	-	CHH	CCCAC	NA	0	0	1
UBE2C	2688	-	CHH	GCCCA	NA	0	0	1
UBE2C	2689	-	CHH	GGCCC	NA	0	0	1
UBE2C	2690	+	CHH	GGCCT	NA	0	0	1
UBE2C	2691	+	CHH	GCCTA	NA	0	0	1
UBE2C	2694	-	CHH	ATCTA	NA	0	0	1
UBE2C	2697	-	CHH	TTCAT	NA	0	0	1
UBE2C	2700	-	CHH	GTCTT	NA	0	0	1
UBE2C	2702	+	CG	GACGC	NA	0	0	1
UBE2C	2703	-	CG	AGCGT	NA	0	0	1
UBE2C	2704	+	CHH	CGCTC	NA	0	0	1
UBE2C	2706	+	CHH	CTCAA	NA	0	0	1
UBE2C	2709	-	CHH	TCCTT	NA	0	0	1
UBE2C	2710	-	CHH	GTCCT	NA	0	0	1
UBE2C	2712	+	CHH	GACCC	NA	0	0	1
UBE2C	2713	+	CHH	ACCCT	NA	0	0	1
UBE2C	2714	+	CHH	CCCTC	NA	0	0	1
UBE2C	2716	+	CG	CTCGT	NA	0	0	1
UBE2C	2717	-	CG	CACGA	NA	0	0	1
UBE2C	2719	-	CHH	GTCAC	NA	0	0	1
UBE2C	2721	+	CHH	GACTT	NA	0	0	1
UBE2C	2724	-	CHH	GCCAA	NA	0	0	1
UBE2C	2725	-	CHH	GGCCA	NA	0	0	1
UBE2C	2726	+	CHG	GGCCG	NA	0	0	1
UBE2C	2727	+	CG	GCCGA	NA	0	0	1
UBE2C	2728	-	CG	CTCGG	NA	0	0	1
UBE2C	2730	-	CHH	GTCTC	NA	0	0	1
UBE2C	2732	+	CHG	GACAG	NA	0	0	1
UBE2C	2734	-	CHG	CCCTG	NA	0	0	1
UBE2C	2735	-	CHH	CCCCT	NA	0	0	1
UBE2C	2736	-	CHH	TCCCC	NA	0	0	1
UBE2C	2737	-	CHH	TTCCC	NA	0	0	1
UBE2C	2740	-	CHH	CCCTT	NA	0	0	1
UBE2C	2741	-	CHH	TCCCT	NA	0	0	1
UBE2C	2742	-	CHH	CTCCC	NA	0	0	1
UBE2C	2744	-	CHH	TTCTC	NA	0	0	1
UBE2C	2747	-	CHH	AACTT	NA	0	0	1
UBE2C	2750	-	CHH	CTCAA	NA	0	0	1
UBE2C	2752	-	CHH	GACTC	NA	0	0	1
UBE2C	2754	+	CG	GTCGG	NA	0	0	1
UBE2C	2755	-	CG	CCCGA	NA	0	0	1
UBE2C	2756	-	CHG	GCCCG	NA	0	0	1
UBE2C	2757	-	CHH	TGCCC	NA	0	0	1
UBE2C	2758	+	CHH	GGCAA	NA	0	0	1
UBE2C	2761	-	CHH	TCCTT	NA	0	0	1
UBE2C	2762	-	CHH	TTCCT	NA	0	0	1
UBE2C	2765	-	CHH	CTCTT	NA	0	0	1
UBE2C	2767	-	CHH	ATCTC	NA	0	0	1
UBE2C	2770	-	CHH	AGCAT	NA	0	0	1
UBE2C	2771	+	CHH	TGCTA	NA	0	0	1
UBE2C	2776	-	CHH	GGCTT	NA	0	0	1
UBE2C	2777	+	CHH	AGCCT	NA	0	0	1
UBE2C	2778	+	CHG	GCCTG	NA	0	0	1
UBE2C	2780	-	CHG	CCCAG	NA	0	0	1
UBE2C	2781	-	CHH	CCCCA	NA	0	0	1
UBE2C	2782	-	CHH	TCCCC	NA	0	0	1
UBE2C	2783	-	CHH	TTCCC	NA	0	0	1
UBE2C	2790	-	CHH	TTCTT	NA	0	0	1
UBE2C	2793	+	CHH	AACAT	NA	0	0	1
UBE2C	2796	-	CHH	GGCAT	NA	0	0	1
UBE2C	2797	+	CHH	TGCCA	NA	0	0	1
UBE2C	2798	+	CHG	GCCAG	NA	0	0	1
UBE2C	2800	-	CHG	TTCTG	NA	0	0	1
UBE2C	2804	+	CHH	ATCAT	NA	0	0	1
UBE2C	2807	+	CHH	ATCCC	NA	0	0	1
UBE2C	2808	+	CHG	TCCCG	NA	0	0	1
UBE2C	2809	+	CG	CCCGA	NA	0	0	1
UBE2C	2810	-	CG	CTCGG	NA	0	0	1
UBE2C	2812	-	CHH	CCCTC	NA	0	0	1
UBE2C	2813	-	CHH	TCCCT	NA	0	0	1
UBE2C	2814	-	CHH	CTCCC	NA	0	0	1
UBE2C	2816	-	CHH	GACTC	NA	0	0	1
UBE2C	2818	+	CHG	GTCTG	NA	0	0	1
UBE2C	2820	-	CHG	TCCAG	NA	0	0	1
UBE2C	2821	-	CHH	TTCCA	NA	0	0	1
UBE2C	2827	-	CHH	CCCTA	NA	0	0	1
UBE2C	2828	-	CHH	TCCCT	NA	0	0	1
UBE2C	2829	-	CHH	CTCCC	NA	0	0	1
UBE2C	2831	-	CHH	CCCTC	NA	0	0	1
UBE2C	2832	-	CHH	ACCCT	NA	0	0	1
UBE2C	2833	-	CHH	CACCC	NA	0	0	1
UBE2C	2835	-	CHH	CTCAC	NA	0	0	1
UBE2C	2837	-	CHH	TCCTC	NA	0	0	1
UBE2C	2838	-	CHH	GTCCT	NA	0	0	1
UBE2C	2840	+	CHH	GACTC	NA	0	0	1
UBE2C	2842	+	CG	CTCGC	NA	0	0	1
UBE2C	2843	-	CG	AGCGA	NA	0	0	1
UBE2C	2844	+	CHH	CGCTA	NA	0	0	1
UBE2C	2847	-	CHH	TCCTA	NA	0	0	1
UBE2C	2848	-	CHH	ATCCT	NA	0	0	1
UBE2C	2851	+	CG	ATCGT	NA	0	0	1
UBE2C	2852	-	CG	GACGA	NA	0	0	1
UBE2C	2854	+	CHH	GTCCT	NA	0	0	1
UBE2C	2855	+	CHG	TCCTG	NA	0	0	1
UBE2C	2857	-	CHG	CACAG	NA	0	0	1
UBE2C	2859	-	CHH	TCCAC	NA	0	0	1
UBE2C	2860	-	CHH	ATCCA	NA	0	0	1
UBE2C	2863	+	CHG	ATCTG	NA	0	0	1
UBE2C	2865	-	CHG	ACCAG	NA	0	0	1
UBE2C	2866	-	CHH	CACCA	NA	0	0	1
UBE2C	2868	-	CHH	CTCAC	NA	0	0	1
UBE2C	2870	-	CHH	TACTC	NA	0	0	1
UBE2C	2875	+	CHH	TACCC	NA	0	0	1
UBE2C	2876	+	CHH	ACCCT	NA	0	0	1
UBE2C	2877	+	CHG	CCCTG	NA	0	0	1
UBE2C	2879	-	CHG	CTCAG	NA	0	0	1
UBE2C	2881	-	CHH	AGCTC	NA	0	0	1
UBE2C	2882	+	CHG	AGCTG	NA	0	0	1
UBE2C	2884	-	CHG	CTCAG	NA	0	0	1
UBE2C	2886	-	CHH	GGCTC	NA	0	0	1
UBE2C	2887	+	CHH	AGCCT	NA	0	0	1
UBE2C	2888	+	CHG	GCCTG	NA	0	0	1
UBE2C	2890	-	CHG	GTCAG	NA	0	0	1
UBE2C	2892	+	CHH	GACCT	NA	0	0	1
UBE2C	2893	+	CHH	ACCTT	NA	0	0	1
UBE2C	2896	-	CHH	ACCAA	NA	0	0	1
UBE2C	2897	-	CHH	CACCA	NA	0	0	1
UBE2C	2899	-	CHH	ATCAC	NA	0	0	1
UBE2C	2902	-	CHH	CACAT	NA	0	0	1
UBE2C	2904	-	CHH	CCCAC	NA	0	0	1
UBE2C	2905	-	CHH	CCCCA	NA	0	0	1
UBE2C	2906	-	CHH	TCCCC	NA	0	0	1
UBE2C	2907	-	CHH	CTCCC	NA	0	0	1
UBE2C	2909	-	CHH	GGCTC	NA	0	0	1
UBE2C	2910	+	CHH	AGCCT	NA	0	0	1
UBE2C	2911	+	CHH	GCCTC	NA	0	0	1
UBE2C	2913	+	CHH	CTCCA	NA	0	0	1
UBE2C	2914	+	CHH	TCCAT	NA	0	0	1
UBE2C	2917	-	CHH	GTCAT	NA	0	0	1
UBE2C	2919	+	CG	GACGG	NA	0	0	1
UBE2C	2920	-	CG	GCCGT	NA	0	0	1
UBE2C	2921	-	CHG	AGCCG	NA	0	0	1
UBE2C	2922	+	CHH	GGCTC	NA	0	0	1
UBE2C	2924	+	CHH	CTCCC	NA	0	0	1
UBE2C	2925	+	CHH	TCCCC	NA	0	0	1
UBE2C	2926	+	CHH	CCCCC	NA	0	0	1
UBE2C	2927	+	CHH	CCCCT	NA	0	0	1
UBE2C	2928	+	CHG	CCCTG	NA	0	0	1
UBE2C	2930	-	CHG	CTCAG	NA	0	0	1
UBE2C	2932	-	CHH	ATCTC	NA	0	0	1
UBE2C	2936	+	CHG	TTCAG	NA	0	0	1
UBE2C	2938	-	CHG	ACCTG	NA	0	0	1
UBE2C	2939	-	CHH	CACCT	NA	0	0	1
UBE2C	2941	-	CHH	CCCAC	NA	0	0	1
UBE2C	2942	-	CHH	TCCCA	NA	0	0	1
UBE2C	2943	-	CHH	CTCCC	NA	0	0	1
UBE2C	2945	-	CHH	TTCTC	NA	0	0	1
UBE2C	2948	-	CHH	ATCTT	NA	0	0	1
UBE2C	2951	-	CHH	TGCAT	NA	0	0	1
UBE2C	2952	+	CHH	TGCAC	NA	0	0	1
UBE2C	2954	+	CHG	CACCG	NA	0	0	1
UBE2C	2955	+	CG	ACCGT	NA	0	0	1
UBE2C	2956	-	CG	GACGG	NA	0	0	1
UBE2C	2958	+	CHG	GTCTG	NA	0	0	1
UBE2C	2960	-	CHG	TCCAG	NA	0	0	1
UBE2C	2961	-	CHH	CTCCA	NA	0	0	1
UBE2C	2963	-	CHH	GCCTC	NA	0	0	1
UBE2C	2964	-	CHH	GGCCT	NA	0	0	1
UBE2C	2965	+	CHH	GGCCT	NA	0	0	1
UBE2C	2966	+	CHG	GCCTG	NA	0	0	1
UBE2C	2968	-	CHG	GCCAG	NA	0	0	1
UBE2C	2969	-	CHH	GGCCA	NA	0	0	1
UBE2C	2970	+	CHH	GGCCC	NA	0	0	1
UBE2C	2971	+	CHH	GCCCA	NA	0	0	1
UBE2C	2972	+	CHH	CCCAT	NA	0	0	1
UBE2C	2975	+	CHH	ATCCA	NA	0	0	1
UBE2C	2976	+	CHG	TCCAG	NA	0	0	1
UBE2C	2978	-	CHG	GTCTG	NA	0	0	1
UBE2C	2980	+	CHH	GACTC	NA	0	0	1
UBE2C	2982	+	CHH	CTCCC	NA	0	0	1
UBE2C	2983	+	CHH	TCCCA	NA	0	0	1
UBE2C	2984	+	CHG	CCCAG	NA	0	0	1
UBE2C	2986	-	CHG	ACCTG	NA	0	0	1
UBE2C	2987	-	CHH	TACCT	NA	0	0	1
UBE2C	2991	+	CHH	AACCC	NA	0	0	1
UBE2C	2992	+	CHH	ACCCC	NA	0	0	1
UBE2C	2993	+	CHG	CCCCG	NA	0	0	1
UBE2C	2994	+	CG	CCCGA	NA	0	0	1
UBE2C	2995	-	CG	TTCGG	NA	0	0	1
UBE2C	3000	+	CHH	TACTC	NA	0	0	1
UBE2C	3002	+	CHH	CTCTT	NA	0	0	1
UBE2C	3009	+	CHG	TTCAG	NA	0	0	1
UBE2C	3011	-	CHG	GCCTG	NA	0	0	1
UBE2C	3012	-	CHH	AGCCT	NA	0	0	1
UBE2C	3013	+	CHH	GGCTA	NA	0	0	1
UBE2C	3016	+	CHG	TACAG	NA	0	0	1
UBE2C	3018	-	CHG	TGCTG	NA	0	0	1
UBE2C	3019	+	CHG	AGCAG	NA	0	0	1
UBE2C	3021	-	CHG	TCCTG	NA	0	0	1
UBE2C	3022	-	CHH	CTCCT	NA	0	0	1
UBE2C	3024	-	CHH	AGCTC	NA	0	0	1
UBE2C	3025	+	CHG	AGCTG	NA	0	0	1
UBE2C	3027	-	CHG	ATCAG	NA	0	0	1
UBE2C	3030	-	CHH	GTCAT	NA	0	0	1
UBE2C	3032	+	CHH	GACCC	NA	0	0	1
UBE2C	3033	+	CHH	ACCCT	NA	0	0	1
UBE2C	3034	+	CHH	CCCTC	NA	0	0	1
UBE2C	3036	+	CHH	CTCAT	NA	0	0	1
UBE2C	3039	-	CHH	ACCAT	NA	0	0	1
UBE2C	3040	-	CHH	CACCA	NA	0	0	1
UBE2C	3042	-	CHH	CTCAC	NA	0	0	1
UBE2C	3044	-	CHH	CACTC	NA	0	0	1
UBE2C	3046	-	CHH	ATCAC	NA	0	0	1
UBE2C	3052	-	CHH	CACTT	NA	0	0	1
UBE2C	3054	-	CHH	GGCAC	NA	0	0	1
UBE2C	3055	+	CHH	TGCCC	NA	0	0	1
UBE2C	3056	+	CHH	GCCCA	NA	0	0	1
UBE2C	3057	+	CHG	CCCAG	NA	0	0	1
UBE2C	3059	-	CHG	TTCTG	NA	0	0	1
UBE2C	3062	+	CHH	AACCC	NA	0	0	1
UBE2C	3063	+	CHH	ACCCC	NA	0	0	1
UBE2C	3064	+	CHH	CCCCA	NA	0	0	1
UBE2C	3065	+	CHG	CCCAG	NA	0	0	1
UBE2C	3067	-	CHG	GGCTG	NA	0	0	1
UBE2C	3068	+	CHH	AGCCT	NA	0	0	1
UBE2C	3069	+	CHH	GCCTT	NA	0	0	1
UBE2C	3072	+	CHH	TTCCA	NA	0	0	1
UBE2C	3073	+	CHH	TCCAT	NA	0	0	1
UBE2C	3076	+	CHH	ATCCA	NA	0	0	1
UBE2C	3077	+	CHH	TCCAA	NA	0	0	1
UBE2C	3084	+	CHG	TTCAG	NA	0	0	1
UBE2C	3086	-	CHG	TACTG	NA	0	0	1
UBE2C	3089	-	CHH	GGCTA	NA	0	0	1
UBE2C	3090	+	CHH	AGCCT	NA	0	0	1
UBE2C	3091	+	CHH	GCCTC	NA	0	0	1
UBE2C	3093	+	CHH	CTCCT	NA	0	0	1
UBE2C	3094	+	CHH	TCCTT	NA	0	0	1
UBE2C	3101	+	CHG	TTCCG	NA	0	0	1
UBE2C	3102	+	CG	TCCGT	NA	0	0	1
UBE2C	3103	-	CG	GACGG	NA	0	0	1
UBE2C	3105	+	CHG	GTCAG	NA	0	0	1
UBE2C	3107	-	CHG	AGCTG	NA	0	0	1
UBE2C	3108	+	CHH	AGCTT	NA	0	0	1
UBE2C	3115	-	CHH	AGCAA	NA	0	0	1
UBE2C	3116	+	CHH	TGCTA	NA	0	0	1
UBE2C	3119	-	CHH	GTCTA	NA	0	0	1
UBE2C	3121	+	CHH	GACAT	NA	0	0	1
UBE2C	3125	-	CHH	CCCTA	NA	0	0	1
UBE2C	3126	-	CHH	CCCCT	NA	0	0	1
UBE2C	3127	-	CHH	ACCCC	NA	0	0	1
UBE2C	3128	-	CHH	TACCC	NA	0	0	1
UBE2C	3133	-	CHH	TACAT	NA	0	0	1
UBE2C	3140	-	CHH	AGCAA	NA	0	0	1
UBE2C	3141	+	CHH	TGCTC	NA	0	0	1
UBE2C	3143	+	CHH	CTCCC	NA	0	0	1
UBE2C	3144	+	CHH	TCCCT	NA	0	0	1
UBE2C	3145	+	CHH	CCCTC	NA	0	0	1
UBE2C	3147	+	CHH	CTCCT	NA	0	0	1
UBE2C	3148	+	CHG	TCCTG	NA	0	0	1
UBE2C	3150	-	CHG	CCCAG	NA	0	0	1
UBE2C	3151	-	CHH	TCCCA	NA	0	0	1
UBE2C	3152	-	CHH	TTCCC	NA	0	0	1
UBE2C	3156	-	CHH	TTCTT	NA	0	0	1
UBE2C	3159	-	CHH	AACTT	NA	0	0	1
UBE2C	3162	+	CHH	TTCAT	NA	0	0	1
UBE2C	3166	+	CHH	TACAC	NA	0	0	1
UBE2C	3168	+	CHH	CACCC	NA	0	0	1
UBE2C	3169	+	CHH	ACCCC	NA	0	0	1
UBE2C	3170	+	CHH	CCCCA	NA	0	0	1
UBE2C	3171	+	CHH	CCCAC	NA	0	0	1
UBE2C	3173	+	CHH	CACCT	NA	0	0	1
UBE2C	3174	+	CHH	ACCTA	NA	0	0	1
UBE2C	3177	+	CHH	TACAC	NA	0	0	1
UBE2C	3179	+	CHH	CACCA	NA	0	0	1
UBE2C	3180	+	CHH	ACCAT	NA	0	0	1
UBE2C	3185	+	CHH	TTCTT	NA	0	0	1
UBE2C	3188	+	CHH	TTCCA	NA	0	0	1
UBE2C	3189	+	CHG	TCCAG	NA	0	0	1
UBE2C	3191	-	CHG	TGCTG	NA	0	0	1
UBE2C	3192	+	CHG	AGCAG	NA	0	0	1
UBE2C	3194	-	CHG	GACTG	NA	0	0	1
UBE2C	3196	+	CHH	GTCCC	NA	0	0	1
UBE2C	3197	+	CHH	TCCCT	NA	0	0	1
UBE2C	3198	+	CHH	CCCTC	NA	0	0	1
UBE2C	3200	+	CHH	CTCCT	NA	0	0	1
UBE2C	3201	+	CHH	TCCTC	NA	0	0	1
UBE2C	3203	+	CHH	CTCCC	NA	0	0	1
UBE2C	3204	+	CHH	TCCCA	NA	0	0	1
UBE2C	3205	+	CHH	CCCAA	NA	0	0	1
UBE2C	3210	+	CHH	TTCCA	NA	0	0	1
UBE2C	3211	+	CHH	TCCAT	NA	0	0	1
UBE2C	3214	+	CHH	ATCCC	NA	0	0	1
UBE2C	3215	+	CHH	TCCCC	NA	0	0	1
UBE2C	3216	+	CHH	CCCCC	NA	0	0	1
UBE2C	3217	+	CHH	CCCCC	NA	0	0	1
UBE2C	3218	+	CHH	CCCCA	NA	0	0	1
UBE2C	3219	+	CHH	CCCAC	NA	0	0	1
UBE2C	3221	+	CHH	CACAC	NA	0	0	1
UBE2C	3223	+	CG	CACGA	NA	0	0	1
UBE2C	3224	-	CG	TTCGT	NA	0	0	1
UBE2C	3227	-	CHH	AACTT	NA	0	0	1
UBE2C	3232	+	CHH	ATCTC	NA	0	0	1
UBE2C	3234	+	CG	CTCGA	NA	0	0	1
UBE2C	3235	-	CG	TTCGA	NA	0	0	1
UBE2C	3238	+	CHH	AACAC	NA	0	0	1
UBE2C	3240	+	CHH	CACTT	NA	0	0	1
UBE2C	3243	+	CHH	TTCCC	NA	0	0	1
UBE2C	3244	+	CHH	TCCCT	NA	0	0	1
UBE2C	3245	+	CHG	CCCTG	NA	0	0	1
UBE2C	3247	-	CHG	TTCAG	NA	0	0	1
UBE2C	3250	-	CHH	GACTT	NA	0	0	1
UBE2C	3252	+	CHH	GTCAT	NA	0	0	1
UBE2C	3256	+	CHH	TACAA	NA	0	0	1
UBE2C	3259	-	CHH	GTCTT	NA	0	0	1
UBE2C	3261	+	CHH	GACCC	NA	0	0	1
UBE2C	3262	+	CHH	ACCCT	NA	0	0	1
UBE2C	3263	+	CHH	CCCTC	NA	0	0	1
UBE2C	3265	+	CHH	CTCCC	NA	0	0	1
UBE2C	3266	+	CHH	TCCCT	NA	0	0	1
UBE2C	3267	+	CHH	CCCTA	NA	0	0	1
UBE2C	3271	+	CHH	ATCCA	NA	0	0	1
UBE2C	3272	+	CHG	TCCAG	NA	0	0	1
UBE2C	3274	-	CHG	CACTG	NA	0	0	1
UBE2C	3276	-	CHH	CACAC	NA	0	0	1
UBE2C	3278	-	CHH	GACAC	NA	0	0	1
UBE2C	3280	+	CHH	GTCCC	NA	0	0	1
UBE2C	3281	+	CHH	TCCCT	NA	0	0	1
UBE2C	3282	+	CHH	CCCTA	NA	0	0	1
UBE2C	3285	+	CHH	TACTT	NA	0	0	1
UBE2C	3288	+	CHH	TTCCT	NA	0	0	1
UBE2C	3289	+	CHH	TCCTA	NA	0	0	1
UBE2C	3292	-	CHH	GGCTA	NA	0	0	1
UBE2C	3293	+	CHH	AGCCC	NA	0	0	1
UBE2C	3294	+	CHH	GCCCC	NA	0	0	1
UBE2C	3295	+	CHH	CCCCA	NA	0	0	1
UBE2C	3296	+	CHH	CCCAA	NA	0	0	1
UBE2C	3299	+	CHH	AACCA	NA	0	0	1
UBE2C	3300	+	CHH	NACCA	NA	0	0	1

## Sheet: SKOV3.methyl
#chr	pos	strand	type	context	ratio	methyl_C	normal_C	binom_p
UBE2C	3	-	CHH	ACCAT	NA	0	0	1
UBE2C	4	-	CHH	AACCA	NA	0	0	1
UBE2C	8	+	CHH	TTCCT	NA	0	0	1
UBE2C	9	+	CHH	TCCTC	NA	0	0	1
UBE2C	11	+	CHH	CTCTT	NA	0	0	1
UBE2C	14	+	CHH	TTCCT	NA	0	0	1
UBE2C	15	+	CHG	TCCTG	NA	0	0	1
UBE2C	17	-	CHG	ATCAG	NA	0	0	1
UBE2C	22	+	CHH	TTCCT	NA	0	0	1
UBE2C	23	+	CHG	TCCTG	NA	0	0	1
UBE2C	25	-	CHG	AACAG	NA	0	0	1
UBE2C	29	+	CHH	TTCCA	NA	0	0	1
UBE2C	30	+	CHH	TCCAT	NA	0	0	1
UBE2C	42	-	CHH	AGCAA	NA	0	0	1
UBE2C	43	+	CHG	TGCTG	NA	0	0	1
UBE2C	45	-	CHG	GCCAG	NA	0	0	1
UBE2C	46	-	CHH	AGCCA	NA	0	0	1
UBE2C	47	+	CHH	GGCTT	NA	0	0	1
UBE2C	51	+	CHH	TTCTT	NA	0	0	1
UBE2C	54	-	CHH	GGCAA	NA	0	0	1
UBE2C	55	+	CHH	TGCCA	NA	0	0	1
UBE2C	56	+	CHH	GCCAT	NA	0	0	1
UBE2C	62	-	CHH	AACAA	NA	0	0	1
UBE2C	69	+	CHH	AACCC	NA	0	0	1
UBE2C	70	+	CHH	ACCCA	NA	0	0	1
UBE2C	71	+	CHH	CCCAC	NA	0	0	1
UBE2C	73	+	CHH	CACCT	NA	0	0	1
UBE2C	74	+	CHH	ACCTT	NA	0	0	1
UBE2C	77	-	CHH	CCCAA	NA	0	0	1
UBE2C	78	-	CHH	ACCCA	NA	0	0	1
UBE2C	79	-	CHH	GACCC	NA	0	0	1
UBE2C	81	+	CHH	GTCCT	NA	0	0	1
UBE2C	82	+	CHH	TCCTT	NA	0	0	1
UBE2C	86	+	CG	TTCGT	NA	0	0	1
UBE2C	87	-	CG	TACGA	NA	0	0	1
UBE2C	92	+	CHH	TACTT	NA	0	0	1
UBE2C	95	-	CHH	ATCAA	NA	0	0	1
UBE2C	98	+	CHH	ATCTT	NA	0	0	1
UBE2C	103	+	CHH	AACCA	NA	0	0	1
UBE2C	104	+	CHH	ACCAA	NA	0	0	1
UBE2C	109	-	CHH	ACCTT	NA	0	0	1
UBE2C	110	-	CHH	CACCT	NA	0	0	1
UBE2C	112	-	CHH	TACAC	NA	0	0	1
UBE2C	115	-	CHH	TCCTA	NA	0	0	1
UBE2C	116	-	CHH	CTCCT	NA	0	0	1
UBE2C	118	-	CHH	TGCTC	NA	0	0	1
UBE2C	119	+	CHH	AGCAA	NA	0	0	1
UBE2C	123	-	CHH	ACCAT	NA	0	0	1
UBE2C	124	-	CHH	CACCA	NA	0	0	1
UBE2C	126	-	CHH	TCCAC	NA	0	0	1
UBE2C	127	-	CHH	ATCCA	NA	0	0	1
UBE2C	130	+	CHH	ATCCC	NA	0	0	1
UBE2C	131	+	CHH	TCCCT	NA	0	0	1
UBE2C	132	+	CHH	CCCTT	NA	0	0	1
UBE2C	142	+	CHH	TTCTT	0	0	1	1
UBE2C	150	+	CHH	TTCTT	0	0	1	1
UBE2C	167	+	CHH	TTCTT	0	0	1	1
UBE2C	176	+	CHH	TTCAC	NA	0	0	1
UBE2C	178	+	CHH	CACCA	NA	0	0	1
UBE2C	179	+	CHH	ACCAC	NA	0	0	1
UBE2C	181	+	CHH	CACAC	NA	0	0	1
UBE2C	183	+	CHH	CACCA	NA	0	0	1
UBE2C	184	+	CHH	ACCAT	NA	0	0	1
UBE2C	188	+	CHH	TTCAA	NA	0	0	1
UBE2C	191	-	CHH	CTCTT	NA	0	0	1
UBE2C	193	-	CHH	CTCTC	NA	0	0	1
UBE2C	195	-	CHH	TTCTC	NA	0	0	1
UBE2C	200	-	CHH	CCCAT	NA	0	0	1
UBE2C	201	-	CHH	ACCCA	NA	0	0	1
UBE2C	202	-	CHH	GACCC	NA	0	0	1
UBE2C	204	+	CHH	GTCCT	NA	0	0	1
UBE2C	205	+	CHH	TCCTT	NA	0	0	1
UBE2C	216	-	CHH	CTCTT	NA	0	0	1
UBE2C	218	-	CHH	TTCTC	NA	0	0	1
UBE2C	221	-	CHH	GCCTT	NA	0	0	1
UBE2C	222	-	CHH	AGCCT	NA	0	0	1
UBE2C	223	+	CHH	GGCTA	NA	0	0	1
UBE2C	233	-	CHH	GACTT	NA	0	0	1
UBE2C	235	+	CHH	GTCAC	NA	0	0	1
UBE2C	237	+	CHH	CACCA	NA	0	0	1
UBE2C	238	+	CHG	ACCAG	NA	0	0	1
UBE2C	240	-	CHG	GACTG	NA	0	0	1
UBE2C	242	+	CHH	GTCCC	NA	0	0	1
UBE2C	243	+	CHH	TCCCT	NA	0	0	1
UBE2C	244	+	CHH	CCCTA	NA	0	0	1
UBE2C	247	+	CHH	TACTC	NA	0	0	1
UBE2C	249	+	CHH	CTCTC	NA	0	0	1
UBE2C	251	+	CHH	CTCCC	NA	0	0	1
UBE2C	252	+	CHH	TCCCA	NA	0	0	1
UBE2C	253	+	CHH	CCCAT	NA	0	0	1
UBE2C	256	+	CHH	ATCCA	NA	0	0	1
UBE2C	257	+	CHH	TCCAT	NA	0	0	1
UBE2C	260	-	CHH	TTCAT	NA	0	0	1
UBE2C	263	-	CHH	TGCTT	NA	0	0	1
UBE2C	264	+	CHH	AGCAT	NA	0	0	1
UBE2C	267	+	CHH	ATCTA	NA	0	0	1
UBE2C	270	+	CHG	TACTG	NA	0	0	1
UBE2C	272	-	CHG	TACAG	NA	0	0	1
UBE2C	275	-	CHH	TACTA	NA	0	0	1
UBE2C	281	-	CHH	ATCTT	NA	0	0	1
UBE2C	285	-	CHH	GACAA	NA	0	0	1
UBE2C	287	+	CHH	GTCTC	NA	0	0	1
UBE2C	289	+	CHH	CTCAA	NA	0	0	1
UBE2C	292	-	CHH	TCCTT	NA	0	0	1
UBE2C	293	-	CHH	TTCCT	NA	0	0	1
UBE2C	296	+	CHH	AACCA	NA	0	0	1
UBE2C	297	+	CHH	ACCAT	NA	0	0	1
UBE2C	301	+	CHH	TTCCC	NA	0	0	1
UBE2C	302	+	CHH	TCCCA	NA	0	0	1
UBE2C	303	+	CHH	CCCAT	NA	0	0	1
UBE2C	306	+	CHH	ATCCC	NA	0	0	1
UBE2C	307	+	CHH	TCCCT	NA	0	0	1
UBE2C	308	+	CHH	CCCTC	NA	0	0	1
UBE2C	310	+	CHH	CTCCC	NA	0	0	1
UBE2C	311	+	CHH	TCCCC	NA	0	0	1
UBE2C	312	+	CHH	CCCCA	NA	0	0	1
UBE2C	313	+	CHH	CCCAC	NA	0	0	1
UBE2C	315	+	CHH	CACTT	NA	0	0	1
UBE2C	319	+	CHH	TACTC	NA	0	0	1
UBE2C	321	+	CHH	CTCTT	NA	0	0	1
UBE2C	324	+	CHG	TTCCG	NA	0	0	1
UBE2C	325	+	CG	TCCGT	NA	0	0	1
UBE2C	326	-	CG	TACGG	NA	0	0	1
UBE2C	329	+	CHH	TACTA	NA	0	0	1
UBE2C	336	-	CHH	TACAA	NA	0	0	1
UBE2C	341	+	CHG	AACCG	NA	0	0	1
UBE2C	342	+	CG	ACCGC	NA	0	0	1
UBE2C	343	-	CG	TGCGG	NA	0	0	1
UBE2C	344	+	CHH	CGCAT	NA	0	0	1
UBE2C	347	+	CHH	ATCCC	NA	0	0	1
UBE2C	348	+	CHH	TCCCC	NA	0	0	1
UBE2C	349	+	CHH	CCCCC	NA	0	0	1
UBE2C	350	+	CHG	CCCCG	NA	0	0	1
UBE2C	351	+	CG	CCCGC	NA	0	0	1
UBE2C	352	-	CG	AGCGG	NA	0	0	1
UBE2C	353	+	CHH	CGCTT	NA	0	0	1
UBE2C	356	+	CHH	TTCCA	NA	0	0	1
UBE2C	357	+	CHH	TCCAC	NA	0	0	1
UBE2C	359	+	CHH	CACCT	NA	0	0	1
UBE2C	360	+	CHH	ACCTA	NA	0	0	1
UBE2C	363	-	CHH	TACTA	NA	0	0	1
UBE2C	366	-	CHH	TGCTA	NA	0	0	1
UBE2C	367	+	CHG	AGCAG	NA	0	0	1
UBE2C	369	-	CHG	GCCTG	NA	0	0	1
UBE2C	370	-	CHH	GGCCT	NA	0	0	1
UBE2C	371	+	CHH	GGCCT	NA	0	0	1
UBE2C	372	+	CHH	GCCTT	NA	0	0	1
UBE2C	376	+	CHH	TACAT	NA	0	0	1
UBE2C	383	+	CHG	AACAG	NA	0	0	1
UBE2C	385	-	CHG	ATCTG	NA	0	0	1
UBE2C	388	-	CHH	AACAT	NA	0	0	1
UBE2C	395	-	CHH	TTCAT	NA	0	0	1
UBE2C	398	-	CHH	CACTT	NA	0	0	1
UBE2C	400	-	CHH	AACAC	NA	0	0	1
UBE2C	404	+	CHG	TACTG	NA	0	0	1
UBE2C	406	-	CHG	CTCAG	NA	0	0	1
UBE2C	408	-	CHH	AACTC	NA	0	0	1
UBE2C	411	-	CHH	TCCAA	NA	0	0	1
UBE2C	412	-	CHH	CTCCA	NA	0	0	1
UBE2C	414	-	CHH	CACTC	NA	0	0	1
UBE2C	416	-	CHH	TTCAC	NA	0	0	1
UBE2C	421	-	CHH	TTCAT	NA	0	0	1
UBE2C	425	+	CHG	ATCAG	NA	0	0	1
UBE2C	427	-	CHG	GCCTG	NA	0	0	1
UBE2C	428	-	CHH	TGCCT	NA	0	0	1
UBE2C	429	+	CHH	GGCAA	NA	0	0	1
UBE2C	433	-	CHH	GTCAT	NA	0	0	1
UBE2C	435	+	CHH	GACCA	NA	0	0	1
UBE2C	436	+	CHH	ACCAC	NA	0	0	1
UBE2C	438	+	CHH	CACTC	NA	0	0	1
UBE2C	440	+	CHH	CTCTC	NA	0	0	1
UBE2C	442	+	CHH	CTCCC	NA	0	0	1
UBE2C	443	+	CHH	TCCCT	NA	0	0	1
UBE2C	444	+	CHH	CCCTT	NA	0	0	1
UBE2C	447	-	CHH	AGCAA	NA	0	0	1
UBE2C	448	+	CHH	TGCTC	NA	0	0	1
UBE2C	450	+	CHH	CTCCT	NA	0	0	1
UBE2C	451	+	CHG	TCCTG	NA	0	0	1
UBE2C	453	-	CHG	GGCAG	NA	0	0	1
UBE2C	454	+	CHH	TGCCT	NA	0	0	1
UBE2C	455	+	CHH	GCCTC	NA	0	0	1
UBE2C	457	+	CHG	CTCAG	NA	0	0	1
UBE2C	459	-	CHG	GCCTG	NA	0	0	1
UBE2C	460	-	CHH	GGCCT	NA	0	0	1
UBE2C	461	+	CHH	GGCCT	NA	0	0	1
UBE2C	462	+	CHH	GCCTA	NA	0	0	1
UBE2C	465	+	CHH	TACCT	NA	0	0	1
UBE2C	466	+	CHH	ACCTC	NA	0	0	1
UBE2C	468	+	CHH	CTCCT	NA	0	0	1
UBE2C	469	+	CHH	TCCTC	NA	0	0	1
UBE2C	471	+	CHH	CTCAT	NA	0	0	1
UBE2C	474	+	CG	ATCGA	NA	0	0	1
UBE2C	475	-	CG	CTCGA	NA	0	0	1
UBE2C	477	-	CHH	TCCTC	NA	0	0	1
UBE2C	478	-	CHH	CTCCT	NA	0	0	1
UBE2C	480	-	CHH	TCCTC	NA	0	0	1
UBE2C	481	-	CHH	GTCCT	NA	0	0	1
UBE2C	483	+	CHH	GACAT	NA	0	0	1
UBE2C	486	+	CHG	ATCCG	NA	0	0	1
UBE2C	487	+	CG	TCCGG	NA	0	0	1
UBE2C	488	-	CG	CCCGG	NA	0	0	1
UBE2C	489	-	CHG	TCCCG	NA	0	0	1
UBE2C	490	-	CHH	GTCCC	NA	0	0	1
UBE2C	492	+	CHH	GACCT	NA	0	0	1
UBE2C	493	+	CHH	ACCTT	NA	0	0	1
UBE2C	496	-	CHH	CGCAA	NA	0	0	1
UBE2C	497	+	CG	TGCGG	NA	0	0	1
UBE2C	498	-	CG	GCCGC	NA	0	0	1
UBE2C	499	-	CHG	GGCCG	NA	0	0	1
UBE2C	500	+	CHH	GGCCA	NA	0	0	1
UBE2C	501	+	CHG	GCCAG	NA	0	0	1
UBE2C	503	-	CHG	CACTG	NA	0	0	1
UBE2C	505	-	CHH	ATCAC	NA	0	0	1
UBE2C	508	-	CHH	ATCAT	NA	0	0	1
UBE2C	513	+	CHG	TACAG	NA	0	0	1
UBE2C	515	-	CHG	ACCTG	NA	0	0	1
UBE2C	516	-	CHH	TACCT	NA	0	0	1
UBE2C	522	+	CHH	AACCA	NA	0	0	1
UBE2C	523	+	CHG	ACCAG	NA	0	0	1
UBE2C	525	-	CHG	CACTG	NA	0	0	1
UBE2C	527	-	CHH	CCCAC	NA	0	0	1
UBE2C	528	-	CHH	ACCCA	NA	0	0	1
UBE2C	529	-	CHH	GACCC	NA	0	0	1
UBE2C	531	+	CHH	GTCTC	NA	0	0	1
UBE2C	533	+	CHH	CTCCT	NA	0	0	1
UBE2C	534	+	CHG	TCCTG	NA	0	0	1
UBE2C	536	-	CHG	GGCAG	NA	0	0	1
UBE2C	537	+	CHH	TGCCC	NA	0	0	1
UBE2C	538	+	CHH	GCCCC	NA	0	0	1
UBE2C	539	+	CHH	CCCCT	NA	0	0	1
UBE2C	540	+	CHH	CCCTT	NA	0	0	1
UBE2C	543	+	CHH	TTCTC	NA	0	0	1
UBE2C	545	+	CHH	CTCCT	NA	0	0	1
UBE2C	546	+	CHH	TCCTC	NA	0	0	1
UBE2C	548	+	CHH	CTCTC	NA	0	0	1
UBE2C	550	+	CHH	CTCCC	NA	0	0	1
UBE2C	551	+	CHH	TCCCT	NA	0	0	1
UBE2C	552	+	CHG	CCCTG	NA	0	0	1
UBE2C	554	-	CHG	GGCAG	NA	0	0	1
UBE2C	555	+	CHH	TGCCT	NA	0	0	1
UBE2C	556	+	CHH	GCCTC	NA	0	0	1
UBE2C	558	+	CHH	CTCCA	NA	0	0	1
UBE2C	559	+	CHH	TCCAA	NA	0	0	1
UBE2C	565	-	CHH	GGCTA	NA	0	0	1
UBE2C	566	+	CHH	AGCCC	NA	0	0	1
UBE2C	567	+	CHH	GCCCC	NA	0	0	1
UBE2C	568	+	CHH	CCCCT	NA	0	0	1
UBE2C	569	+	CHH	CCCTA	NA	0	0	1
UBE2C	572	-	CHH	TTCTA	NA	0	0	1
UBE2C	576	-	CHH	CTCAT	NA	0	0	1
UBE2C	578	-	CHH	GCCTC	NA	0	0	1
UBE2C	579	-	CHH	TGCCT	NA	0	0	1
UBE2C	580	+	CHG	GGCAG	NA	0	0	1
UBE2C	582	-	CHG	CCCTG	NA	0	0	1
UBE2C	583	-	CHH	GCCCT	NA	0	0	1
UBE2C	584	-	CHH	GGCCC	NA	0	0	1
UBE2C	585	+	CHH	GGCCT	NA	0	0	1
UBE2C	586	+	CHH	GCCTA	NA	0	0	1
UBE2C	589	+	CHH	TACAT	NA	0	0	1
UBE2C	592	+	CHH	ATCCT	NA	0	0	1
UBE2C	593	+	CHH	TCCTC	NA	0	0	1
UBE2C	595	+	CHH	CTCAC	NA	0	0	1
UBE2C	597	+	CHH	CACTT	NA	0	0	1
UBE2C	600	+	CHH	TTCCC	NA	0	0	1
UBE2C	601	+	CHH	TCCCC	NA	0	0	1
UBE2C	602	+	CHH	CCCCC	NA	0	0	1
UBE2C	603	+	CHH	CCCCA	NA	0	0	1
UBE2C	604	+	CHH	CCCAA	NA	0	0	1
UBE2C	607	+	CHH	AACTT	NA	0	0	1
UBE2C	610	+	CHH	TTCTC	NA	0	0	1
UBE2C	612	+	CHH	CTCTC	NA	0	0	1
UBE2C	614	+	CHH	CTCTT	NA	0	0	1
UBE2C	617	+	CHH	TTCAA	NA	0	0	1
UBE2C	621	-	CHH	GACAT	NA	0	0	1
UBE2C	623	+	CHG	GTCTG	NA	0	0	1
UBE2C	625	-	CHG	AACAG	NA	0	0	1
UBE2C	628	+	CHH	TTCCA	NA	0	0	1
UBE2C	629	+	CHG	TCCAG	NA	0	0	1
UBE2C	631	-	CHG	CTCTG	NA	0	0	1
UBE2C	633	-	CHH	TCCTC	NA	0	0	1
UBE2C	634	-	CHH	ATCCT	NA	0	0	1
UBE2C	637	-	CHH	GGCAT	NA	0	0	1
UBE2C	638	+	CHH	TGCCT	NA	0	0	1
UBE2C	639	+	CHG	GCCTG	NA	0	0	1
UBE2C	641	-	CHG	TCCAG	NA	0	0	1
UBE2C	642	-	CHH	ATCCA	NA	0	0	1
UBE2C	645	+	CHG	ATCTG	NA	0	0	1
UBE2C	647	-	CHG	TTCAG	NA	0	0	1
UBE2C	650	-	CHH	AGCTT	NA	0	0	1
UBE2C	651	+	CHH	AGCTA	NA	0	0	1
UBE2C	654	-	CHH	CTCTA	NA	0	0	1
UBE2C	656	-	CHH	TCCTC	NA	0	0	1
UBE2C	657	-	CHH	TTCCT	NA	0	0	1
UBE2C	662	-	CHH	TTCAA	NA	0	0	1
UBE2C	667	+	CHH	ATCCT	NA	0	0	1
UBE2C	668	+	CHH	TCCTT	NA	0	0	1
UBE2C	672	-	CHH	GACAA	NA	0	0	1
UBE2C	674	+	CHH	GTCCT	NA	0	0	1
UBE2C	675	+	CHH	TCCTA	NA	0	0	1
UBE2C	678	+	CHH	TACCC	NA	0	0	1
UBE2C	679	+	CHH	ACCCT	NA	0	0	1
UBE2C	680	+	CHH	CCCTC	NA	0	0	1
UBE2C	682	+	CHH	CTCCT	NA	0	0	1
UBE2C	683	+	CHG	TCCTG	NA	0	0	1
UBE2C	685	-	CHG	TCCAG	NA	0	0	1
UBE2C	686	-	CHH	ATCCA	NA	0	0	1
UBE2C	689	-	CHH	ACCAT	NA	0	0	1
UBE2C	690	-	CHH	CACCA	NA	0	0	1
UBE2C	692	-	CHH	TCCAC	NA	0	0	1
UBE2C	693	-	CHH	CTCCA	NA	0	0	1
UBE2C	695	-	CHH	TTCTC	NA	0	0	1
UBE2C	698	-	CHH	ATCTT	NA	0	0	1
UBE2C	701	-	CHH	CTCAT	NA	0	0	1
UBE2C	703	-	CHH	TTCTC	NA	0	0	1
UBE2C	707	-	CHH	TACTT	NA	0	0	1
UBE2C	713	-	CHH	TCCAT	NA	0	0	1
UBE2C	714	-	CHH	CTCCA	NA	0	0	1
UBE2C	716	-	CHH	GTCTC	NA	0	0	1
UBE2C	718	+	CHH	GACAC	NA	0	0	1
UBE2C	720	+	CHH	CACTA	NA	0	0	1
UBE2C	723	+	CG	TACGG	NA	0	0	1
UBE2C	724	-	CG	TCCGT	NA	0	0	1
UBE2C	725	-	CHG	GTCCG	NA	0	0	1
UBE2C	727	+	CHG	GACAG	NA	0	0	1
UBE2C	729	-	CHG	CTCTG	NA	0	0	1
UBE2C	731	-	CHH	TTCTC	NA	0	0	1
UBE2C	735	-	CHH	CTCAT	NA	0	0	1
UBE2C	737	-	CHH	TGCTC	NA	0	0	1
UBE2C	738	+	CHH	AGCAT	NA	0	0	1
UBE2C	741	+	CG	ATCGT	NA	0	0	1
UBE2C	742	-	CG	CACGA	NA	0	0	1
UBE2C	744	-	CHH	AGCAC	NA	0	0	1
UBE2C	745	+	CHG	TGCTG	NA	0	0	1
UBE2C	747	-	CHG	AACAG	NA	0	0	1
UBE2C	750	-	CHH	TTCAA	NA	0	0	1
UBE2C	753	-	CHH	TGCTT	NA	0	0	1
UBE2C	754	+	CHH	AGCAC	NA	0	0	1
UBE2C	756	+	CHH	CACCT	NA	0	0	1
UBE2C	757	+	CHH	ACCTC	NA	0	0	1
UBE2C	759	+	CHH	CTCCA	NA	0	0	1
UBE2C	760	+	CHH	TCCAC	NA	0	0	1
UBE2C	762	+	CHG	CACAG	NA	0	0	1
UBE2C	764	-	CHG	GTCTG	NA	0	0	1
UBE2C	766	+	CHH	GACCT	NA	0	0	1
UBE2C	767	+	CHG	ACCTG	NA	0	0	1
UBE2C	769	-	CHG	CTCAG	NA	0	0	1
UBE2C	771	-	CHH	GCCTC	NA	0	0	1
UBE2C	772	-	CHH	GGCCT	NA	0	0	1
UBE2C	773	+	CHG	GGCCG	NA	0	0	1
UBE2C	774	+	CG	GCCGG	NA	0	0	1
UBE2C	775	-	CG	CCCGG	NA	0	0	1
UBE2C	776	-	CHG	ACCCG	NA	0	0	1
UBE2C	777	-	CHH	GACCC	NA	0	0	1
UBE2C	779	+	CHH	GTCCC	NA	0	0	1
UBE2C	780	+	CHH	TCCCC	NA	0	0	1
UBE2C	781	+	CHH	CCCCT	NA	0	0	1
UBE2C	782	+	CHG	CCCTG	NA	0	0	1
UBE2C	784	-	CHG	GCCAG	NA	0	0	1
UBE2C	785	-	CHH	GGCCA	NA	0	0	1
UBE2C	786	+	CHH	GGCCA	NA	0	0	1
UBE2C	787	+	CHH	GCCAC	NA	0	0	1
UBE2C	789	+	CHH	CACAC	NA	0	0	1
UBE2C	791	+	CHH	CACTT	NA	0	0	1
UBE2C	794	-	CHH	GCCAA	NA	0	0	1
UBE2C	795	-	CHH	TGCCA	NA	0	0	1
UBE2C	796	+	CHG	GGCAG	NA	0	0	1
UBE2C	798	-	CHG	GGCTG	NA	0	0	1
UBE2C	799	+	CHH	AGCCC	NA	0	0	1
UBE2C	800	+	CHH	GCCCT	NA	0	0	1
UBE2C	801	+	CHH	CCCTC	NA	0	0	1
UBE2C	803	+	CHH	CTCCT	NA	0	0	1
UBE2C	804	+	CHH	TCCTC	NA	0	0	1
UBE2C	806	+	CHH	CTCCA	NA	0	0	1
UBE2C	807	+	CHH	TCCAA	NA	0	0	1
UBE2C	811	-	CHH	GGCTT	NA	0	0	1
UBE2C	812	+	CHH	AGCCC	NA	0	0	1
UBE2C	813	+	CHH	GCCCT	NA	0	0	1
UBE2C	814	+	CHH	CCCTC	NA	0	0	1
UBE2C	816	+	CHH	CTCTT	NA	0	0	1
UBE2C	819	+	CHH	TTCCT	NA	0	0	1
UBE2C	820	+	CHH	TCCTC	NA	0	0	1
UBE2C	822	+	CHH	CTCAC	NA	0	0	1
UBE2C	824	+	CG	CACGT	NA	0	0	1
UBE2C	825	-	CG	CACGT	NA	0	0	1
UBE2C	827	-	CHH	GCCAC	NA	0	0	1
UBE2C	828	-	CHH	AGCCA	NA	0	0	1
UBE2C	829	+	CHG	GGCTG	NA	0	0	1
UBE2C	831	-	CHG	CTCAG	NA	0	0	1
UBE2C	833	-	CHH	GCCTC	NA	0	0	1
UBE2C	834	-	CHH	GGCCT	NA	0	0	1
UBE2C	835	+	CHH	GGCCA	NA	0	0	1
UBE2C	836	+	CHH	GCCAC	NA	0	0	1
UBE2C	838	+	CHG	CACCG	NA	0	0	1
UBE2C	839	+	CG	ACCGC	NA	0	0	1
UBE2C	840	-	CG	AGCGG	NA	0	0	1
UBE2C	841	+	CHG	CGCTG	NA	0	0	1
UBE2C	843	-	CHG	CCCAG	NA	0	0	1
UBE2C	844	-	CHH	TCCCA	NA	0	0	1
UBE2C	845	-	CHH	GTCCC	NA	0	0	1
UBE2C	847	+	CHG	GACTG	NA	0	0	1
UBE2C	849	-	CHG	AGCAG	NA	0	0	1
UBE2C	850	+	CHH	TGCTC	NA	0	0	1
UBE2C	852	+	CHH	CTCCT	NA	0	0	1
UBE2C	853	+	CHH	TCCTA	NA	0	0	1
UBE2C	856	-	CHH	ATCTA	NA	0	0	1
UBE2C	859	-	CHH	TCCAT	NA	0	0	1
UBE2C	860	-	CHH	ATCCA	NA	0	0	1
UBE2C	863	+	CHH	ATCTC	NA	0	0	1
UBE2C	865	+	CHG	CTCAG	NA	0	0	1
UBE2C	867	-	CHG	CGCTG	NA	0	0	1
UBE2C	868	+	CG	AGCGG	NA	0	0	1
UBE2C	869	-	CG	GCCGC	NA	0	0	1
UBE2C	870	-	CHG	TGCCG	NA	0	0	1
UBE2C	871	+	CHH	GGCAT	NA	0	0	1
UBE2C	877	-	CHH	AGCTT	NA	0	0	1
UBE2C	878	+	CHG	AGCTG	NA	0	0	1
UBE2C	880	-	CHG	CACAG	NA	0	0	1
UBE2C	882	-	CHH	GGCAC	NA	0	0	1
UBE2C	883	+	CHH	TGCCT	NA	0	0	1
UBE2C	884	+	CHG	GCCTG	NA	0	0	1
UBE2C	886	-	CHG	CTCAG	NA	0	0	1
UBE2C	888	-	CHH	CGCTC	NA	0	0	1
UBE2C	889	+	CG	AGCGA	NA	0	0	1
UBE2C	890	-	CG	CTCGC	NA	0	0	1
UBE2C	892	-	CHH	AACTC	NA	0	0	1
UBE2C	896	-	CHH	TACAA	NA	0	0	1
UBE2C	899	-	CHH	CACTA	NA	0	0	1
UBE2C	901	-	CHH	GTCAC	NA	0	0	1
UBE2C	903	+	CHH	GACTC	NA	0	0	1
UBE2C	905	+	CHH	CTCAC	NA	0	0	1
UBE2C	907	+	CHG	CACTG	NA	0	0	1
UBE2C	909	-	CHG	TGCAG	NA	0	0	1
UBE2C	910	+	CHH	TGCAC	NA	0	0	1
UBE2C	912	+	CHG	CACAG	NA	0	0	1
UBE2C	914	-	CHG	TGCTG	NA	0	0	1
UBE2C	915	+	CHH	AGCAC	NA	0	0	1
UBE2C	917	+	CHH	CACCC	NA	0	0	1
UBE2C	918	+	CHH	ACCCC	NA	0	0	1
UBE2C	919	+	CHH	CCCCC	NA	0	0	1
UBE2C	920	+	CHH	CCCCA	NA	0	0	1
UBE2C	921	+	CHG	CCCAG	NA	0	0	1
UBE2C	923	-	CHG	GTCTG	NA	0	0	1
UBE2C	925	+	CHH	GACTA	NA	0	0	1
UBE2C	928	-	CHH	TGCTA	NA	0	0	1
UBE2C	929	+	CHH	AGCAT	NA	0	0	1
UBE2C	932	-	CHH	CACAT	NA	0	0	1
UBE2C	934	-	CHH	ACCAC	NA	0	0	1
UBE2C	935	-	CHH	AACCA	NA	0	0	1
UBE2C	938	+	CHH	TTCTA	NA	0	0	1
UBE2C	946	-	CHH	TACAA	NA	0	0	1
UBE2C	951	-	CHH	AACTT	NA	0	0	1
UBE2C	957	-	CHH	CCCAA	NA	0	0	1
UBE2C	958	-	CHH	TCCCA	NA	0	0	1
UBE2C	959	-	CHH	ATCCC	NA	0	0	1
UBE2C	964	-	CHH	TTCTT	NA	0	0	1
UBE2C	968	+	CHH	AACAA	NA	0	0	1
UBE2C	976	+	CHG	AACAG	NA	0	0	1
UBE2C	978	-	CHG	AACTG	NA	0	0	1
UBE2C	982	-	CHH	TACAA	NA	0	0	1
UBE2C	985	-	CHH	TACTA	NA	0	0	1
UBE2C	990	+	CHH	AACAC	NA	0	0	1
UBE2C	992	+	CHG	CACAG	NA	0	0	1
UBE2C	994	-	CHG	ATCTG	NA	0	0	1
UBE2C	997	-	CHH	ACCAT	NA	0	0	1
UBE2C	998	-	CHH	CACCA	NA	0	0	1
UBE2C	1000	-	CHH	TTCAC	NA	0	0	1
UBE2C	1003	+	CHH	AACCT	NA	0	0	1
UBE2C	1004	+	CHG	ACCTG	NA	0	0	1
UBE2C	1006	-	CHG	AGCAG	NA	0	0	1
UBE2C	1007	+	CHG	TGCTG	NA	0	0	1
UBE2C	1009	-	CHG	CACAG	NA	0	0	1
UBE2C	1011	-	CHH	GGCAC	NA	0	0	1
UBE2C	1012	+	CHH	TGCCC	NA	0	0	1
UBE2C	1013	+	CHH	GCCCT	NA	0	0	1
UBE2C	1014	+	CHH	CCCTC	NA	0	0	1
UBE2C	1016	+	CHH	CTCTA	NA	0	0	1
UBE2C	1019	+	CHH	TACCT	NA	0	0	1
UBE2C	1020	+	CHH	ACCTT	NA	0	0	1
UBE2C	1023	-	CHH	CACAA	NA	0	0	1
UBE2C	1025	-	CHH	CCCAC	NA	0	0	1
UBE2C	1026	-	CHH	TCCCA	NA	0	0	1
UBE2C	1027	-	CHH	TTCCC	NA	0	0	1
UBE2C	1032	-	CHH	GTCAA	NA	0	0	1
UBE2C	1034	+	CHG	GACAG	NA	0	0	1
UBE2C	1036	-	CHG	TTCTG	NA	0	0	1
UBE2C	1039	+	CHH	AACAT	NA	0	0	1
UBE2C	1042	+	CHH	ATCAA	NA	0	0	1
UBE2C	1045	-	CHH	CCCTT	NA	0	0	1
UBE2C	1046	-	CHH	GCCCT	NA	0	0	1
UBE2C	1047	-	CHH	AGCCC	NA	0	0	1
UBE2C	1048	+	CHH	GGCTC	NA	0	0	1
UBE2C	1050	+	CHH	CTCTA	NA	0	0	1
UBE2C	1053	-	CHH	TTCTA	NA	0	0	1
UBE2C	1056	-	CHH	CACTT	NA	0	0	1
UBE2C	1058	-	CHH	CCCAC	NA	0	0	1
UBE2C	1059	-	CHH	ACCCA	NA	0	0	1
UBE2C	1060	-	CHH	CACCC	NA	0	0	1
UBE2C	1062	-	CHH	TACAC	NA	0	0	1
UBE2C	1065	-	CHH	TCCTA	NA	0	0	1
UBE2C	1066	-	CHH	TTCCT	NA	0	0	1
UBE2C	1073	-	CHH	TCCTT	NA	0	0	1
UBE2C	1074	-	CHH	GTCCT	NA	0	0	1
UBE2C	1076	+	CG	GACGA	NA	0	0	1
UBE2C	1077	-	CG	CTCGT	NA	0	0	1
UBE2C	1079	-	CHH	ATCTC	NA	0	0	1
UBE2C	1084	+	CHH	AACCC	NA	0	0	1
UBE2C	1085	+	CHH	ACCCT	NA	0	0	1
UBE2C	1086	+	CHH	CCCTC	NA	0	0	1
UBE2C	1088	+	CHH	CTCAC	NA	0	0	1
UBE2C	1090	+	CHH	CACCC	NA	0	0	1
UBE2C	1091	+	CHH	ACCCA	NA	0	0	1
UBE2C	1092	+	CHH	CCCAT	NA	0	0	1
UBE2C	1097	+	CHG	AACAG	NA	0	0	1
UBE2C	1099	-	CHG	TACTG	NA	0	0	1
UBE2C	1104	-	CHH	CTCTA	NA	0	0	1
UBE2C	1106	-	CHH	GGCTC	NA	0	0	1
UBE2C	1107	+	CHH	AGCCA	NA	0	0	1
UBE2C	1108	+	CHG	GCCAG	NA	0	0	1
UBE2C	1110	-	CHG	GCCTG	NA	0	0	1
UBE2C	1111	-	CHH	AGCCT	NA	0	0	1
UBE2C	1112	+	CHH	GGCTT	NA	0	0	1
UBE2C	1115	-	CHH	ATCAA	NA	0	0	1
UBE2C	1120	-	CHH	GTCTT	NA	0	0	1
UBE2C	1122	+	CHH	GACCA	NA	0	0	1
UBE2C	1123	+	CHH	ACCAA	NA	0	0	1
UBE2C	1126	+	CHH	AACCT	NA	0	0	1
UBE2C	1127	+	CHG	ACCTG	NA	0	0	1
UBE2C	1129	-	CHG	CCCAG	NA	0	0	1
UBE2C	1130	-	CHH	TCCCA	NA	0	0	1
UBE2C	1131	-	CHH	CTCCC	NA	0	0	1
UBE2C	1133	-	CHH	TGCTC	NA	0	0	1
UBE2C	1134	+	CHH	AGCAC	NA	0	0	1
UBE2C	1136	+	CHH	CACCA	NA	0	0	1
UBE2C	1137	+	CHH	ACCAT	NA	0	0	1
UBE2C	1140	-	CHH	TACAT	NA	0	0	1
UBE2C	1143	+	CHH	TACCC	NA	0	0	1
UBE2C	1144	+	CHH	ACCCT	NA	0	0	1
UBE2C	1145	+	CHG	CCCTG	NA	0	0	1
UBE2C	1147	-	CHG	GGCAG	NA	0	0	1
UBE2C	1148	+	CHH	TGCCC	NA	0	0	1
UBE2C	1149	+	CHG	GCCCG	NA	0	0	1
UBE2C	1150	+	CG	CCCGT	NA	0	0	1
UBE2C	1151	-	CG	GACGG	NA	0	0	1
UBE2C	1153	+	CHH	GTCTT	NA	0	0	1
UBE2C	1156	+	CHH	TTCCC	NA	0	0	1
UBE2C	1157	+	CHH	TCCCT	NA	0	0	1
UBE2C	1158	+	CHH	CCCTT	NA	0	0	1
UBE2C	1162	-	CHH	GGCAA	NA	0	0	1
UBE2C	1163	+	CHH	TGCCC	NA	0	0	1
UBE2C	1164	+	CHH	GCCCA	NA	0	0	1
UBE2C	1165	+	CHH	CCCAT	NA	0	0	1
UBE2C	1170	-	CHH	TACAA	NA	0	0	1
UBE2C	1173	-	CHH	AACTA	NA	0	0	1
UBE2C	1177	+	CHH	TTCCT	NA	0	0	1
UBE2C	1178	+	CHH	TCCTT	NA	0	0	1
UBE2C	1182	+	CHH	TACCC	NA	0	0	1
UBE2C	1183	+	CHH	ACCCA	NA	0	0	1
UBE2C	1184	+	CHG	CCCAG	NA	0	0	1
UBE2C	1186	-	CHG	AGCTG	NA	0	0	1
UBE2C	1187	+	CHH	AGCTA	NA	0	0	1
UBE2C	1192	-	CHH	TACAT	NA	0	0	1
UBE2C	1196	-	CHH	TCCTT	NA	0	0	1
UBE2C	1197	-	CHH	GTCCT	NA	0	0	1
UBE2C	1199	+	CHH	GACAT	NA	0	0	1
UBE2C	1202	-	CHH	GCCAT	NA	0	0	1
UBE2C	1203	-	CHH	TGCCA	NA	0	0	1
UBE2C	1204	+	CHG	GGCAG	NA	0	0	1
UBE2C	1206	-	CHG	TTCTG	NA	0	0	1
UBE2C	1210	-	CHH	CGCAT	NA	0	0	1
UBE2C	1211	+	CG	TGCGA	NA	0	0	1
UBE2C	1212	-	CG	ATCGC	NA	0	0	1
UBE2C	1215	-	CHH	TCCAT	NA	0	0	1
UBE2C	1216	-	CHH	CTCCA	NA	0	0	1
UBE2C	1218	-	CHH	AACTC	NA	0	0	1
UBE2C	1222	-	CHH	ATCAA	NA	0	0	1
UBE2C	1225	-	CHH	GTCAT	NA	0	0	1
UBE2C	1227	+	CHG	GACAG	NA	0	0	1
UBE2C	1229	-	CHG	ATCTG	NA	0	0	1
UBE2C	1232	+	CHH	ATCAT	NA	0	0	1
UBE2C	1237	-	CHH	TTCAT	NA	0	0	1
UBE2C	1245	-	CHH	CTCTA	NA	0	0	1
UBE2C	1247	-	CHH	AACTC	NA	0	0	1
UBE2C	1250	-	CHH	GCCAA	NA	0	0	1
UBE2C	1251	-	CHH	AGCCA	NA	0	0	1
UBE2C	1252	+	CHH	GGCTT	NA	0	0	1
UBE2C	1260	-	CHH	AGCAA	NA	0	0	1
UBE2C	1261	+	CHH	TGCTC	NA	0	0	1
UBE2C	1263	+	CHH	CTCCC	NA	0	0	1
UBE2C	1264	+	CHH	TCCCA	NA	0	0	1
UBE2C	1265	+	CHH	CCCAT	NA	0	0	1
UBE2C	1272	+	CHG	TACAG	NA	0	0	1
UBE2C	1274	-	CHG	ACCTG	NA	0	0	1
UBE2C	1275	-	CHH	AACCT	NA	0	0	1
UBE2C	1280	-	CHH	ATCTT	NA	0	0	1
UBE2C	1284	+	CHH	TACTA	NA	0	0	1
UBE2C	1289	-	CHH	TCCTT	NA	0	0	1
UBE2C	1290	-	CHH	GTCCT	NA	0	0	1
UBE2C	1292	+	CHH	GACCC	NA	0	0	1
UBE2C	1293	+	CHG	ACCCG	NA	0	0	1
UBE2C	1294	+	CG	CCCGC	NA	0	0	1
UBE2C	1295	-	CG	GGCGG	NA	0	0	1
UBE2C	1296	+	CHH	CGCCC	NA	0	0	1
UBE2C	1297	+	CHH	GCCCC	NA	0	0	1
UBE2C	1298	+	CHH	CCCCA	NA	0	0	1
UBE2C	1299	+	CHH	CCCAA	NA	0	0	1
UBE2C	1302	-	CHH	ACCTT	NA	0	0	1
UBE2C	1303	-	CHH	AACCT	NA	0	0	1
UBE2C	1307	+	CHH	TACAC	NA	0	0	1
UBE2C	1309	+	CHH	CACAC	NA	0	0	1
UBE2C	1311	+	CHH	CACTA	NA	0	0	1
UBE2C	1314	+	CHH	TACCC	NA	0	0	1
UBE2C	1315	+	CHH	ACCCA	NA	0	0	1
UBE2C	1316	+	CHH	CCCAC	NA	0	0	1
UBE2C	1318	+	CHG	CACTG	NA	0	0	1
UBE2C	1320	-	CHG	CCCAG	NA	0	0	1
UBE2C	1321	-	CHH	CCCCA	NA	0	0	1
UBE2C	1322	-	CHH	TCCCC	NA	0	0	1
UBE2C	1323	-	CHH	CTCCC	NA	0	0	1
UBE2C	1325	-	CHH	ACCTC	NA	0	0	1
UBE2C	1326	-	CHH	TACCT	NA	0	0	1
UBE2C	1329	-	CHH	TCCTA	NA	0	0	1
UBE2C	1330	-	CHH	ATCCT	NA	0	0	1
UBE2C	1336	+	CHG	TACAG	NA	0	0	1
UBE2C	1338	-	CHG	TCCTG	NA	0	0	1
UBE2C	1339	-	CHH	ATCCT	NA	0	0	1
UBE2C	1344	-	CHH	TTCAT	NA	0	0	1
UBE2C	1347	+	CHH	AACCT	NA	0	0	1
UBE2C	1348	+	CHG	ACCTG	NA	0	0	1
UBE2C	1350	-	CHG	CACAG	NA	0	0	1
UBE2C	1352	-	CHH	AACAC	NA	0	0	1
UBE2C	1355	-	CHH	AACAA	NA	0	0	1
UBE2C	1358	-	CHH	CCCAA	NA	0	0	1
UBE2C	1359	-	CHH	CCCCA	NA	0	0	1
UBE2C	1360	-	CHH	ACCCC	NA	0	0	1
UBE2C	1361	-	CHH	AACCC	NA	0	0	1
UBE2C	1367	-	CHH	AACAA	NA	0	0	1
UBE2C	1371	-	CHH	AACAA	NA	0	0	1
UBE2C	1375	-	CHH	TTCAA	NA	0	0	1
UBE2C	1378	-	CHH	GTCTT	NA	0	0	1
UBE2C	1380	+	CHG	GACAG	NA	0	0	1
UBE2C	1382	-	CHG	GACTG	NA	0	0	1
UBE2C	1384	+	CHH	GTCTT	NA	0	0	1
UBE2C	1387	-	CHH	AGCAA	NA	0	0	1
UBE2C	1388	+	CHH	TGCTC	NA	0	0	1
UBE2C	1390	+	CHG	CTCTG	NA	0	0	1
UBE2C	1392	-	CHG	AACAG	NA	0	0	1
UBE2C	1395	-	CHH	GGCAA	NA	0	0	1
UBE2C	1396	+	CHH	TGCCC	NA	0	0	1
UBE2C	1397	+	CHH	GCCCA	NA	0	0	1
UBE2C	1398	+	CHG	CCCAG	NA	0	0	1
UBE2C	1400	-	CHG	GCCTG	NA	0	0	1
UBE2C	1401	-	CHH	AGCCT	NA	0	0	1
UBE2C	1402	+	CHH	GGCTA	NA	0	0	1
UBE2C	1405	-	CHH	CTCTA	NA	0	0	1
UBE2C	1407	-	CHH	CACTC	NA	0	0	1
UBE2C	1409	-	CHH	TGCAC	NA	0	0	1
UBE2C	1410	+	CHG	TGCAG	NA	0	0	1
UBE2C	1412	-	CHG	GGCTG	NA	0	0	1
UBE2C	1413	+	CHH	AGCCT	NA	0	0	1
UBE2C	1414	+	CHH	GCCTC	NA	0	0	1
UBE2C	1416	+	CHG	CTCTG	NA	0	0	1
UBE2C	1418	-	CHG	GCCAG	NA	0	0	1
UBE2C	1419	-	CHH	AGCCA	NA	0	0	1
UBE2C	1420	+	CHH	GGCTC	NA	0	0	1
UBE2C	1422	+	CHH	CTCAA	NA	0	0	1
UBE2C	1425	-	CHH	CGCTT	NA	0	0	1
UBE2C	1426	+	CG	AGCGA	NA	0	0	1
UBE2C	1427	-	CG	ATCGC	NA	0	0	1
UBE2C	1431	+	CHH	TTCTC	NA	0	0	1
UBE2C	1433	+	CHH	CTCCC	NA	0	0	1
UBE2C	1434	+	CHG	TCCCG	NA	0	0	1
UBE2C	1435	+	CG	CCCGC	NA	0	0	1
UBE2C	1436	-	CG	GGCGG	NA	0	0	1
UBE2C	1437	+	CHH	CGCCT	NA	0	0	1
UBE2C	1438	+	CHH	GCCTC	NA	0	0	1
UBE2C	1440	+	CHG	CTCAG	NA	0	0	1
UBE2C	1442	-	CHG	GGCTG	NA	0	0	1
UBE2C	1443	+	CHH	AGCCT	NA	0	0	1
UBE2C	1444	+	CHH	GCCTC	NA	0	0	1
UBE2C	1446	+	CG	CTCGC	NA	0	0	1
UBE2C	1447	-	CG	GGCGA	NA	0	0	1
UBE2C	1448	+	CHH	CGCCA	NA	0	0	1
UBE2C	1449	+	CHG	GCCAG	NA	0	0	1
UBE2C	1451	-	CHG	TACTG	NA	0	0	1
UBE2C	1454	-	CHH	AGCTA	NA	0	0	1
UBE2C	1455	+	CHG	AGCTG	NA	0	0	1
UBE2C	1457	-	CHG	CCCAG	NA	0	0	1
UBE2C	1458	-	CHH	TCCCA	NA	0	0	1
UBE2C	1459	-	CHH	GTCCC	NA	0	0	1
UBE2C	1461	+	CHH	GACTA	NA	0	0	1
UBE2C	1464	+	CHG	TACAG	NA	0	0	1
UBE2C	1466	-	CHG	GCCTG	NA	0	0	1
UBE2C	1467	-	CHH	AGCCT	NA	0	0	1
UBE2C	1468	+	CHH	GGCTC	NA	0	0	1
UBE2C	1470	+	CG	CTCGT	NA	0	0	1
UBE2C	1471	-	CG	CACGA	NA	0	0	1
UBE2C	1473	-	CHH	GGCAC	NA	0	0	1
UBE2C	1474	+	CHH	TGCCA	NA	0	0	1
UBE2C	1475	+	CHH	GCCAC	NA	0	0	1
UBE2C	1477	+	CHH	CACCT	NA	0	0	1
UBE2C	1478	+	CHH	ACCTC	NA	0	0	1
UBE2C	1480	+	CHH	CTCAC	NA	0	0	1
UBE2C	1482	+	CHH	CACCA	NA	0	0	1
UBE2C	1483	+	CHG	ACCAG	NA	0	0	1
UBE2C	1485	-	CHG	GGCTG	NA	0	0	1
UBE2C	1486	+	CHH	AGCCT	NA	0	0	1
UBE2C	1487	+	CHH	GCCTT	NA	0	0	1
UBE2C	1500	+	CHH	TTCTT	NA	0	0	1
UBE2C	1505	+	CHH	TTCTT	NA	0	0	1
UBE2C	1521	+	CHH	TTCTT	NA	0	0	1
UBE2C	1528	-	CHH	TACTT	NA	0	0	1
UBE2C	1531	-	CHH	CTCTA	NA	0	0	1
UBE2C	1533	-	CHH	GTCTC	NA	0	0	1
UBE2C	1535	+	CHG	GACAG	NA	0	0	1
UBE2C	1537	-	CHG	ACCTG	NA	0	0	1
UBE2C	1538	-	CHH	GACCT	NA	0	0	1
UBE2C	1540	+	CHH	GTCTC	NA	0	0	1
UBE2C	1542	+	CHH	CTCCC	NA	0	0	1
UBE2C	1543	+	CHH	TCCCT	NA	0	0	1
UBE2C	1544	+	CHH	CCCTA	NA	0	0	1
UBE2C	1548	+	CHH	ATCCT	NA	0	0	1
UBE2C	1549	+	CHG	TCCTG	NA	0	0	1
UBE2C	1551	-	CHG	AACAG	NA	0	0	1
UBE2C	1554	-	CHH	AGCAA	NA	0	0	1
UBE2C	1555	+	CHH	TGCTC	NA	0	0	1
UBE2C	1557	+	CHG	CTCAG	NA	0	0	1
UBE2C	1559	-	CHG	GCCTG	NA	0	0	1
UBE2C	1560	-	CHH	AGCCT	NA	0	0	1
UBE2C	1561	+	CHG	GGCTG	NA	0	0	1
UBE2C	1563	-	CHG	ACCAG	NA	0	0	1
UBE2C	1564	-	CHH	GACCA	NA	0	0	1
UBE2C	1566	+	CHH	GTCTC	NA	0	0	1
UBE2C	1568	+	CG	CTCGA	0	0	1	1
UBE2C	1569	-	CG	TTCGA	NA	0	0	1
UBE2C	1572	+	CHH	AACTC	0.25	1	3	0.185494
UBE2C	1574	+	CHH	CTCCT	0.001	204	243055	1
UBE2C	1575	+	CHG	TCCTG	0.001	457	467304	1
UBE2C	1577	-	CHG	CCCAG	NA	0	0	1
UBE2C	1578	-	CHH	ACCCA	NA	0	0	1
UBE2C	1579	-	CHH	AACCC	NA	0	0	1
UBE2C	1582	+	CHH	TTCAA	0.001	154	245688	1
UBE2C	1585	-	CHH	CACTT	NA	0	0	1
UBE2C	1587	-	CHH	ATCAC	NA	0	0	1
UBE2C	1590	+	CHH	ATCCT	0.001	212	246039	1
UBE2C	1591	+	CHH	TCCTC	0.001	179	246037	1
UBE2C	1593	+	CHH	CTCCT	0.001	179	245994	1
UBE2C	1594	+	CHG	TCCTG	0.001	184	245517	1
UBE2C	1596	-	CHG	GGCAG	NA	0	0	1
UBE2C	1597	+	CHH	TGCCT	0.001	214	245410	1
UBE2C	1598	+	CHG	GCCTG	0.001	220	244979	1
UBE2C	1600	-	CHG	CCCAG	NA	0	0	1
UBE2C	1601	-	CHH	GCCCA	NA	0	0	1
UBE2C	1602	-	CHH	GGCCC	NA	0	0	1
UBE2C	1603	+	CHH	GGCCT	0.007	1648	244457	1
UBE2C	1604	+	CHH	GCCTT	0.005	1280	244950	1
UBE2C	1607	+	CHH	TTCCA	0.006	1389	244730	1
UBE2C	1608	+	CHH	TCCAA	0.008	1971	244064	1
UBE2C	1612	-	CHH	CACTT	NA	0	0	1
UBE2C	1614	-	CHH	AACAC	NA	0	0	1
UBE2C	1617	+	CG	TTCGG	0.423	103960	142077	0
UBE2C	1618	-	CG	CCCGA	NA	0	0	1
UBE2C	1619	-	CHG	TCCCG	NA	0	0	1
UBE2C	1620	-	CHH	ATCCC	NA	0	0	1
UBE2C	1625	+	CG	TACGG	0.012	3049	243001	1
UBE2C	1626	-	CG	TCCGT	NA	0	0	1
UBE2C	1627	-	CHG	GTCCG	NA	0	0	1
UBE2C	1629	+	CG	GACGT	0.404	99443	146837	0
UBE2C	1630	-	CG	CACGT	NA	0	0	1
UBE2C	1632	-	CHH	CTCAC	NA	0	0	1
UBE2C	1634	-	CHH	GGCTC	NA	0	0	1
UBE2C	1635	+	CHH	AGCCA	0.006	1492	244880	1
UBE2C	1636	+	CHH	GCCAC	0.007	1771	244369	1
UBE2C	1638	+	CHG	CACTG	0.007	1689	244294	1
UBE2C	1640	-	CHG	CGCAG	NA	0	0	1
UBE2C	1641	+	CG	TGCGA	0.471	115940	130238	0
UBE2C	1642	-	CG	GTCGC	NA	0	0	1
UBE2C	1644	+	CHH	GACCA	0.006	1490	244928	1
UBE2C	1645	+	CHG	ACCAG	0.008	1936	244158	1
UBE2C	1647	-	CHG	GGCTG	NA	0	0	1
UBE2C	1648	+	CHH	AGCCT	0.005	1284	244736	1
UBE2C	1649	+	CHG	GCCTG	0.004	1072	245089	1
UBE2C	1651	-	CHG	TTCAG	NA	0	0	1
UBE2C	1654	+	CHH	AACCA	0.005	1249	244834	1
UBE2C	1655	+	CHH	ACCAA	0.009	2155	244007	1
UBE2C	1659	-	CHH	AACAT	NA	0	0	1
UBE2C	1662	-	CHH	GGCAA	NA	0	0	1
UBE2C	1663	+	CHH	TGCCT	0.005	1272	244576	1
UBE2C	1664	+	CHH	GCCTT	0.006	1376	244442	1
UBE2C	1676	+	CHG	TTCTG	0.004	1041	244970	1
UBE2C	1678	-	CHG	GACAG	NA	0	0	1
UBE2C	1680	+	CHH	GTCAT	0.003	810	244219	1
UBE2C	1683	+	CHH	ATCTC	0.006	1471	244355	1
UBE2C	1685	+	CHG	CTCTG	0.005	1179	244640	1
UBE2C	1687	-	CHG	CGCAG	NA	0	0	1
UBE2C	1688	+	CG	TGCGG	0.382	93068	150708	0
UBE2C	1689	-	CG	TCCGC	NA	0	0	1
UBE2C	1690	-	CHG	CTCCG	NA	0	0	1
UBE2C	1692	-	CHH	ATCTC	NA	0	0	1
UBE2C	1695	-	CHH	TACAT	NA	0	0	1
UBE2C	1699	-	CHH	TCCAT	NA	0	0	1
UBE2C	1700	-	CHH	GTCCA	NA	0	0	1
UBE2C	1702	+	CHH	GACCT	0.003	654	241079	1
UBE2C	1703	+	CHH	ACCTA	0.003	615	241126	1
UBE2C	1707	-	CHH	AACAT	NA	0	0	1
UBE2C	1712	+	CHH	TTCTA	0.002	499	241020	1
UBE2C	1718	-	CHH	CCCTA	NA	0	0	1
UBE2C	1719	-	CHH	TCCCT	NA	0	0	1
UBE2C	1720	-	CHH	CTCCC	NA	0	0	1
UBE2C	1722	-	CHH	GGCTC	NA	0	0	1
UBE2C	1723	+	CHH	AGCCT	NA	0	0	1
UBE2C	1724	+	CHG	GCCTG	NA	0	0	1
UBE2C	1726	-	CHG	AGCAG	NA	0	0	1
UBE2C	1727	+	CHG	TGCTG	NA	0	0	1
UBE2C	1729	-	CHG	AGCAG	NA	0	0	1
UBE2C	1730	+	CHH	TGCTC	NA	0	0	1
UBE2C	1732	+	CHG	CTCTG	NA	0	0	1
UBE2C	1734	-	CHG	GCCAG	NA	0	0	1
UBE2C	1735	-	CHH	GGCCA	NA	0	0	1
UBE2C	1736	+	CHH	GGCCA	NA	0	0	1
UBE2C	1737	+	CHH	GCCAT	NA	0	0	1
UBE2C	1740	+	CHG	ATCAG	0	0	6	1
UBE2C	1742	-	CHG	GGCTG	NA	0	0	1
UBE2C	1743	+	CHH	AGCCT	NA	0	0	1
UBE2C	1744	+	CHH	GCCTT	0	0	1	1
UBE2C	1749	-	CHH	AACTA	NA	0	0	1
UBE2C	1755	+	CHH	TTCCC	0	0	7	1
UBE2C	1756	+	CHH	TCCCC	0	0	7	1
UBE2C	1757	+	CHH	CCCCT	0	0	7	1
UBE2C	1758	+	CHH	CCCTC	0	0	7	1
UBE2C	1760	+	CG	CTCGC	0	0	6	1
UBE2C	1761	-	CG	AGCGA	NA	0	0	1
UBE2C	1762	+	CHG	CGCTG	0	0	7	1
UBE2C	1764	-	CHG	CCCAG	NA	0	0	1
UBE2C	1765	-	CHH	TCCCA	NA	0	0	1
UBE2C	1766	-	CHH	ATCCC	NA	0	0	1
UBE2C	1772	+	CHG	TTCAG	0	0	7	1
UBE2C	1774	-	CHG	ATCTG	NA	0	0	1
UBE2C	1778	+	CHH	TACTT	0.001	288	394422	1
UBE2C	1782	-	CHH	TCCTA	NA	0	0	1
UBE2C	1783	-	CHH	GTCCT	NA	0	0	1
UBE2C	1785	+	CG	GACGC	0.265	209392	581975	0
UBE2C	1786	-	CG	TGCGT	NA	0	0	1
UBE2C	1787	+	CHG	CGCAG	0.001	364	403365	1
UBE2C	1789	-	CHG	TGCTG	NA	0	0	1
UBE2C	1790	+	CHH	AGCAA	0	200	405394	1
UBE2C	1794	-	CHH	ACCTT	NA	0	0	1
UBE2C	1795	-	CHH	CACCT	NA	0	0	1
UBE2C	1797	-	CHH	GGCAC	NA	0	0	1
UBE2C	1798	+	CHH	TGCCC	0.001	380	407697	1
UBE2C	1799	+	CHH	GCCCA	0.001	335	408201	1
UBE2C	1800	+	CHG	CCCAG	0.001	211	407950	1
UBE2C	1802	-	CHG	GCCTG	NA	0	0	1
UBE2C	1803	-	CHH	CGCCT	NA	0	0	1
UBE2C	1804	+	CG	GGCGA	0.068	27741	380800	0.0105913
UBE2C	1805	-	CG	ATCGC	NA	0	0	1
UBE2C	1814	-	CHH	ACCAT	NA	0	0	1
UBE2C	1815	-	CHH	CACCA	NA	0	0	1
UBE2C	1817	-	CHH	CCCAC	NA	0	0	1
UBE2C	1818	-	CHH	TCCCA	NA	0	0	1
UBE2C	1819	-	CHH	CTCCC	NA	0	0	1
UBE2C	1821	-	CHH	CCCTC	NA	0	0	1
UBE2C	1822	-	CHH	ACCCT	NA	0	0	1
UBE2C	1823	-	CHH	TACCC	NA	0	0	1
UBE2C	1826	+	CHH	TACCA	0.005	2008	406514	1
UBE2C	1827	+	CHG	ACCAG	0.005	2025	406145	1
UBE2C	1829	-	CHG	CACTG	NA	0	0	1
UBE2C	1831	-	CHH	AGCAC	NA	0	0	1
UBE2C	1832	+	CHG	TGCTG	0.006	2398	406061	1
UBE2C	1834	-	CHG	TGCAG	NA	0	0	1
UBE2C	1835	+	CHG	TGCAG	0.004	1632	406380	1
UBE2C	1837	-	CHG	TCCTG	NA	0	0	1
UBE2C	1838	-	CHH	ATCCT	NA	0	0	1
UBE2C	1842	-	CHH	TCCAA	NA	0	0	1
UBE2C	1843	-	CHH	CTCCA	NA	0	0	1
UBE2C	1845	-	CHH	GCCTC	NA	0	0	1
UBE2C	1846	-	CHH	TGCCT	NA	0	0	1
UBE2C	1847	+	CHH	GGCAC	0.004	1709	406938	1
UBE2C	1849	+	CHH	CACTC	0.005	1937	406662	1
UBE2C	1851	+	CHH	CTCCC	0.007	2748	405790	1
UBE2C	1852	+	CHH	TCCCT	0.003	1291	407262	1
UBE2C	1853	+	CHG	CCCTG	0.008	3284	405126	1
UBE2C	1855	-	CHG	GGCAG	NA	0	0	1
UBE2C	1856	+	CHH	TGCCC	0.005	2151	406299	1
UBE2C	1857	+	CHG	GCCCG	0.004	1652	406888	1
UBE2C	1858	+	CG	CCCGA	0.008	3124	405323	1
UBE2C	1859	-	CG	CTCGG	NA	0	0	1
UBE2C	1861	-	CHH	CCCTC	NA	0	0	1
UBE2C	1862	-	CHH	TCCCT	NA	0	0	1
UBE2C	1863	-	CHH	TTCCC	NA	0	0	1
UBE2C	1869	-	CHH	TCCAA	NA	0	0	1
UBE2C	1870	-	CHH	ATCCA	NA	0	0	1
UBE2C	1873	+	CHH	ATCAA	0.004	1814	406473	1
UBE2C	1876	-	CHH	GCCTT	NA	0	0	1
UBE2C	1877	-	CHH	AGCCT	NA	0	0	1
UBE2C	1878	+	CHG	GGCTG	0.004	1619	406995	1
UBE2C	1880	-	CHG	CCCAG	NA	0	0	1
UBE2C	1881	-	CHH	GCCCA	NA	0	0	1
UBE2C	1882	-	CHH	CGCCC	NA	0	0	1
UBE2C	1883	+	CG	GGCGT	0.008	3330	405196	1
UBE2C	1884	-	CG	CACGC	NA	0	0	1
UBE2C	1886	-	CHH	GGCAC	NA	0	0	1
UBE2C	1887	+	CHG	TGCCG	0.006	2375	406293	1
UBE2C	1888	+	CG	GCCGA	0.007	2702	405886	1
UBE2C	1889	-	CG	CTCGG	NA	0	0	1
UBE2C	1891	-	CHH	CACTC	NA	0	0	1
UBE2C	1893	-	CHH	AACAC	NA	0	0	1
UBE2C	1896	+	CHH	TTCCC	0.006	2377	406286	1
UBE2C	1897	+	CHH	TCCCA	0.006	2614	405925	1
UBE2C	1898	+	CHH	CCCAC	0.006	2361	406309	1
UBE2C	1900	+	CG	CACGC	0.008	3109	405502	1
UBE2C	1901	-	CG	CGCGT	NA	0	0	1
UBE2C	1902	+	CG	CGCGG	0.007	2950	405340	1
UBE2C	1903	-	CG	TCCGC	NA	0	0	1
UBE2C	1904	-	CHG	CTCCG	NA	0	0	1
UBE2C	1906	-	CHH	TACTC	NA	0	0	1
UBE2C	1910	-	CHH	GTCTT	NA	0	0	1
UBE2C	1912	+	CG	GACGT	0.298	121756	286710	0
UBE2C	1913	-	CG	CACGT	NA	0	0	1
UBE2C	1915	-	CHH	TACAC	NA	0	0	1
UBE2C	1918	-	CHH	GGCTA	NA	0	0	1
UBE2C	1919	+	CHH	AGCCA	0.003	1152	407420	1
UBE2C	1920	+	CHG	GCCAG	0.002	828	406869	1
UBE2C	1922	-	CHG	TTCTG	NA	0	0	1
UBE2C	1925	-	CHH	TCCTT	NA	0	0	1
UBE2C	1926	-	CHH	CTCCT	NA	0	0	1
UBE2C	1928	-	CHH	CCCTC	NA	0	0	1
UBE2C	1929	-	CHH	CCCCT	NA	0	0	1
UBE2C	1930	-	CHH	ACCCC	NA	0	0	1
UBE2C	1931	-	CHH	AACCC	NA	0	0	1
UBE2C	1934	+	CHH	TTCAT	0	0	4	1
UBE2C	1937	+	CHH	ATCCC	0	0	4	1
UBE2C	1938	+	CHH	TCCCA	0	0	4	1
UBE2C	1939	+	CHH	CCCAC	0	0	4	1
UBE2C	1941	+	CG	CACGT	0	0	4	1
UBE2C	1942	-	CG	CACGT	NA	0	0	1
UBE2C	1944	-	CHH	TCCAC	NA	0	0	1
UBE2C	1945	-	CHH	GTCCA	NA	0	0	1
UBE2C	1947	+	CG	GACGT	0	0	4	1
UBE2C	1948	-	CG	AACGT	NA	0	0	1
UBE2C	1953	+	CHH	TTCTT	0	0	4	1
UBE2C	1956	-	CHH	GCCAA	NA	0	0	1
UBE2C	1957	-	CHH	GGCCA	NA	0	0	1
UBE2C	1958	+	CHH	GGCCC	0	0	4	1
UBE2C	1959	+	CHH	GCCCT	0	0	4	1
UBE2C	1960	+	CHH	CCCTT	0	0	4	1
UBE2C	1967	-	CHH	ACCAT	NA	0	0	1
UBE2C	1968	-	CHH	AACCA	NA	0	0	1
UBE2C	1972	-	CHH	CGCTA	NA	0	0	1
UBE2C	1973	+	CG	AGCGT	0	0	4	1
UBE2C	1974	-	CG	AACGC	NA	0	0	1
UBE2C	1979	+	CHH	TTCCA	0	0	4	1
UBE2C	1980	+	CHH	TCCAA	0	0	4	1
UBE2C	1983	+	CG	AACGG	0	0	4	1
UBE2C	1984	-	CG	GCCGT	NA	0	0	1
UBE2C	1985	-	CHG	GGCCG	NA	0	0	1
UBE2C	1986	+	CHH	GGCCA	NA	0	0	1
UBE2C	1987	+	CHH	GCCAC	NA	0	0	1
UBE2C	1989	+	CHH	CACCA	NA	0	0	1
UBE2C	1990	+	CHH	ACCAA	NA	0	0	1
UBE2C	1995	+	CG	TTCGC	NA	0	0	1
UBE2C	1996	-	CG	AGCGA	NA	0	0	1
UBE2C	1997	+	CHH	CGCTA	NA	0	0	1
UBE2C	2000	+	CG	TACGG	NA	0	0	1
UBE2C	2001	-	CG	TCCGT	NA	0	0	1
UBE2C	2002	-	CHG	ATCCG	NA	0	0	1
UBE2C	2006	+	CG	TTCGT	NA	0	0	1
UBE2C	2007	-	CG	AACGA	NA	0	0	1
UBE2C	2011	-	CHH	AACTA	NA	0	0	1
UBE2C	2017	-	CHH	GCCAT	NA	0	0	1
UBE2C	2018	-	CHH	TGCCA	NA	0	0	1
UBE2C	2019	+	CHG	GGCAG	NA	0	0	1
UBE2C	2021	-	CHG	TGCTG	NA	0	0	1
UBE2C	2022	+	CHH	AGCAT	NA	0	0	1
UBE2C	2025	+	CHH	ATCAT	NA	0	0	1
UBE2C	2028	+	CHH	ATCTA	NA	0	0	1
UBE2C	2031	+	CHH	TACCA	NA	0	0	1
UBE2C	2032	+	CHH	ACCAA	NA	0	0	1
UBE2C	2036	+	CG	ATCGG	NA	0	0	1
UBE2C	2037	-	CG	ACCGA	NA	0	0	1
UBE2C	2038	-	CHG	AACCG	NA	0	0	1
UBE2C	2041	-	CHH	GACAA	NA	0	0	1
UBE2C	2043	+	CHG	GTCAG	NA	0	0	1
UBE2C	2045	-	CHG	TTCTG	NA	0	0	1
UBE2C	2048	-	CHH	CGCTT	NA	0	0	1
UBE2C	2049	+	CG	AGCGG	NA	0	0	1
UBE2C	2050	-	CG	CCCGC	NA	0	0	1
UBE2C	2051	-	CHG	TCCCG	NA	0	0	1
UBE2C	2052	-	CHH	ATCCC	NA	0	0	1
UBE2C	2056	+	CHG	TTCTG	NA	0	0	1
UBE2C	2058	-	CHG	GGCAG	NA	0	0	1
UBE2C	2059	+	CHG	TGCCG	NA	0	0	1
UBE2C	2060	+	CG	GCCGC	NA	0	0	1
UBE2C	2061	-	CG	GGCGG	NA	0	0	1
UBE2C	2062	+	CHH	CGCCC	NA	0	0	1
UBE2C	2063	+	CHH	GCCCA	NA	0	0	1
UBE2C	2064	+	CHH	CCCAA	NA	0	0	1
UBE2C	2069	-	CHH	CGCTA	NA	0	0	1
UBE2C	2070	+	CG	AGCGG	NA	0	0	1
UBE2C	2071	-	CG	ACCGC	NA	0	0	1
UBE2C	2072	-	CHG	CACCG	NA	0	0	1
UBE2C	2074	-	CHH	CGCAC	NA	0	0	1
UBE2C	2075	+	CG	TGCGC	NA	0	0	1
UBE2C	2076	-	CG	GGCGC	NA	0	0	1
UBE2C	2077	+	CHH	CGCCA	NA	0	0	1
UBE2C	2078	+	CHG	GCCAG	NA	0	0	1
UBE2C	2080	-	CHG	CACTG	NA	0	0	1
UBE2C	2082	-	CHH	CCCAC	NA	0	0	1
UBE2C	2083	-	CHH	ACCCA	NA	0	0	1
UBE2C	2084	-	CHH	TACCC	NA	0	0	1
UBE2C	2087	-	CHH	ACCTA	NA	0	0	1
UBE2C	2088	-	CHH	GACCT	NA	0	0	1
UBE2C	2090	+	CHH	GTCTA	NA	0	0	1
UBE2C	2093	-	CHH	TGCTA	NA	0	0	1
UBE2C	2094	+	CHG	AGCAG	NA	0	0	1
UBE2C	2096	-	CHG	CACTG	NA	0	0	1
UBE2C	2098	-	CHH	GCCAC	NA	0	0	1
UBE2C	2099	-	CHH	CGCCA	NA	0	0	1
UBE2C	2100	+	CG	GGCGC	NA	0	0	1
UBE2C	2101	-	CG	TGCGC	NA	0	0	1
UBE2C	2102	+	CHG	CGCAG	NA	0	0	1
UBE2C	2104	-	CHG	TGCTG	NA	0	0	1
UBE2C	2105	+	CHH	AGCAA	NA	0	0	1
UBE2C	2110	-	CHH	CTCTA	NA	0	0	1
UBE2C	2112	-	CHH	CGCTC	NA	0	0	1
UBE2C	2113	+	CG	AGCGC	NA	0	0	1
UBE2C	2114	-	CG	AGCGC	NA	0	0	1
UBE2C	2115	+	CHH	CGCTC	NA	0	0	1
UBE2C	2117	+	CHG	CTCCG	NA	0	0	1
UBE2C	2118	+	CG	TCCGG	NA	0	0	1
UBE2C	2119	-	CG	TCCGG	NA	0	0	1
UBE2C	2120	-	CHG	CTCCG	NA	0	0	1
UBE2C	2122	-	CHH	CGCTC	NA	0	0	1
UBE2C	2123	+	CG	AGCGT	NA	0	0	1
UBE2C	2124	-	CG	GACGC	NA	0	0	1
UBE2C	2126	+	CHH	GTCTC	NA	0	0	1
UBE2C	2128	+	CHH	CTCAT	NA	0	0	1
UBE2C	2132	-	CHH	GCCAA	NA	0	0	1
UBE2C	2133	-	CHH	AGCCA	NA	0	0	1
UBE2C	2134	+	CHG	GGCTG	0.001	112	111367	1
UBE2C	2136	-	CHG	TCCAG	NA	0	0	1
UBE2C	2137	-	CHH	ATCCA	NA	0	0	1
UBE2C	2140	+	CHH	ATCAA	0	55	113184	1
UBE2C	2144	+	CHH	AACCC	0	47	112293	1
UBE2C	2145	+	CHH	ACCCA	0	55	113259	1
UBE2C	2146	+	CHH	CCCAA	0	36	113285	1
UBE2C	2149	-	CHH	CGCTT	NA	0	0	1
UBE2C	2150	+	CG	AGCGA	0.285	32202	80746	0
UBE2C	2151	-	CG	CTCGC	NA	0	0	1
UBE2C	2153	-	CHH	GGCTC	NA	0	0	1
UBE2C	2154	+	CHH	AGCCA	0.001	91	113105	1
UBE2C	2155	+	CHH	GCCAT	0	44	113281	1
UBE2C	2159	-	CHH	ATCAA	NA	0	0	1
UBE2C	2163	-	CHH	ACCAA	NA	0	0	1
UBE2C	2164	-	CHH	GACCA	NA	0	0	1
UBE2C	2166	+	CG	GTCGA	0.004	404	112841	1
UBE2C	2167	-	CG	GTCGA	NA	0	0	1
UBE2C	2169	+	CG	GACGC	0.006	726	112391	1
UBE2C	2170	-	CG	GGCGT	NA	0	0	1
UBE2C	2171	+	CHH	CGCCC	0.004	471	112690	1
UBE2C	2172	+	CHH	GCCCC	0.007	789	112409	1
UBE2C	2173	+	CHH	CCCCC	0.005	578	112631	1
UBE2C	2174	+	CHH	CCCCA	0.005	528	112628	1
UBE2C	2175	+	CHG	CCCAG	0.006	703	112473	1
UBE2C	2177	-	CHG	CTCTG	NA	0	0	1
UBE2C	2179	-	CHH	CCCTC	NA	0	0	1
UBE2C	2180	-	CHH	ACCCT	NA	0	0	1
UBE2C	2181	-	CHH	AACCC	NA	0	0	1
UBE2C	2185	+	CHH	TACAA	0.007	740	112330	1
UBE2C	2190	+	CHH	TTCAA	0.002	235	112858	1
UBE2C	2194	+	CG	AACGC	0.004	479	112527	1
UBE2C	2195	-	CG	CGCGT	NA	0	0	1
UBE2C	2196	+	CG	CGCGG	0.007	791	112156	1
UBE2C	2197	-	CG	CCCGC	NA	0	0	1
UBE2C	2198	-	CHG	GCCCG	NA	0	0	1
UBE2C	2199	-	CHH	CGCCC	NA	0	0	1
UBE2C	2200	+	CG	GGCGG	0.004	455	112398	1
UBE2C	2201	-	CG	CCCGC	NA	0	0	1
UBE2C	2202	-	CHG	GCCCG	NA	0	0	1
UBE2C	2203	-	CHH	CGCCC	NA	0	0	1
UBE2C	2204	+	CG	GGCGG	0.004	439	112378	1
UBE2C	2205	-	CG	CCCGC	NA	0	0	1
UBE2C	2206	-	CHG	GCCCG	NA	0	0	1
UBE2C	2207	-	CHH	GGCCC	NA	0	0	1
UBE2C	2208	+	CHH	GGCCC	0.008	943	111672	1
UBE2C	2209	+	CHG	GCCCG	0.006	654	111717	1
UBE2C	2210	+	CG	CCCGC	0.005	612	112083	1
UBE2C	2211	-	CG	TGCGG	NA	0	0	1
UBE2C	2212	+	CHG	CGCAG	0.008	917	111723	1
UBE2C	2214	-	CHG	GACTG	NA	0	0	1
UBE2C	2216	+	CHH	GTCCT	0.004	422	112116	1
UBE2C	2217	+	CHG	TCCTG	0.005	531	112007	1
UBE2C	2219	-	CHG	TGCAG	NA	0	0	1
UBE2C	2220	+	CHG	TGCAG	0.006	667	111955	1
UBE2C	2222	-	CHG	AACTG	NA	0	0	1
UBE2C	2225	-	CHH	TGCAA	NA	0	0	1
UBE2C	2226	+	CHG	TGCAG	0.005	556	111918	1
UBE2C	2228	-	CHG	GACTG	NA	0	0	1
UBE2C	2230	+	CG	GTCGT	0.004	444	111820	1
UBE2C	2231	-	CG	CACGA	NA	0	0	1
UBE2C	2233	-	CHH	AACAC	NA	0	0	1
UBE2C	2236	+	CHH	TTCTC	0.004	423	111826	1
UBE2C	2238	+	CHG	CTCCG	0.006	662	111554	1
UBE2C	2239	+	CG	TCCGA	0.005	598	111705	1
UBE2C	2240	-	CG	CTCGG	NA	0	0	1
UBE2C	2242	-	CHH	AACTC	NA	0	0	1
UBE2C	2245	+	CHH	TTCCT	0.007	793	114375	1
UBE2C	2246	+	CHG	TCCTG	0.007	758	113642	1
UBE2C	2248	-	CHG	GACAG	NA	0	0	1
UBE2C	2250	+	CHH	GTCTC	0.005	588	114626	1
UBE2C	2252	+	CHH	CTCTC	0.006	672	114616	1
UBE2C	2254	+	CHG	CTCTG	0.004	415	113922	1
UBE2C	2256	-	CHG	GGCAG	NA	0	0	1
UBE2C	2257	+	CHH	TGCCA	0.007	752	114512	1
UBE2C	2258	+	CHH	GCCAA	0.009	1006	113731	1
UBE2C	2261	+	CG	AACGC	0.007	839	114504	1
UBE2C	2262	-	CG	GGCGT	NA	0	0	1
UBE2C	2263	+	CHG	CGCCG	0.005	592	113731	1
UBE2C	2264	+	CG	GCCGC	0.008	946	114400	1
UBE2C	2265	-	CG	GGCGG	NA	0	0	1
UBE2C	2266	+	CHH	CGCCC	0.004	517	114732	1
UBE2C	2267	+	CHG	GCCCG	0.005	625	114260	1
UBE2C	2268	+	CG	CCCGG	0.004	427	114477	1
UBE2C	2269	-	CG	TCCGG	NA	0	0	1
UBE2C	2270	-	CHG	ATCCG	NA	0	0	1
UBE2C	2273	-	CHH	GCCAT	NA	0	0	1
UBE2C	2274	-	CHH	AGCCA	NA	0	0	1
UBE2C	2275	+	CHH	GGCTT	0.003	400	114958	1
UBE2C	2278	+	CHH	TTCCC	0.005	552	111025	1
UBE2C	2279	+	CHH	TCCCA	0.005	571	110912	1
UBE2C	2280	+	CHH	CCCAA	0.004	455	111044	1
UBE2C	2285	+	CHG	AACCG	0.003	337	111133	1
UBE2C	2286	+	CG	ACCGC	0.008	874	110846	1
UBE2C	2287	-	CG	CGCGG	NA	0	0	1
UBE2C	2288	+	CG	CGCGA	0.005	592	111125	1
UBE2C	2289	-	CG	GTCGC	NA	0	0	1
UBE2C	2291	+	CHH	GACCC	0.006	712	111062	1
UBE2C	2292	+	CHH	ACCCA	0.004	462	111241	1
UBE2C	2293	+	CHG	CCCAG	0.007	780	110639	1
UBE2C	2295	-	CHG	GGCTG	NA	0	0	1
UBE2C	2296	+	CHG	AGCCG	0.004	449	111305	1
UBE2C	2297	+	CG	GCCGC	0.005	596	111172	1
UBE2C	2298	-	CG	GGCGG	NA	0	0	1
UBE2C	2299	+	CHH	CGCCA	0.007	779	110925	1
UBE2C	2300	+	CHH	GCCAC	0.009	1022	110724	1
UBE2C	2302	+	CHH	CACTA	0.003	382	111398	1
UBE2C	2305	-	CHH	CGCTA	NA	0	0	1
UBE2C	2306	+	CG	AGCGT	0.006	706	111199	1
UBE2C	2307	-	CG	GACGC	NA	0	0	1
UBE2C	2309	+	CG	GTCGC	0.005	571	111378	1
UBE2C	2310	-	CG	GGCGA	NA	0	0	1
UBE2C	2311	+	CHG	CGCCG	0.007	736	111032	1
UBE2C	2312	+	CG	GCCGC	0.011	1279	110582	1
UBE2C	2313	-	CG	GGCGG	NA	0	0	1
UBE2C	2314	+	CHG	CGCCG	0.006	707	110994	1
UBE2C	2315	+	CG	GCCGC	0.008	902	111097	1
UBE2C	2316	-	CG	GGCGG	NA	0	0	1
UBE2C	2317	+	CHH	CGCCC	0.005	567	111416	1
UBE2C	2318	+	CHG	GCCCG	0.009	1015	110933	1
UBE2C	2319	+	CG	CCCGT	0.005	605	111361	1
UBE2C	2320	-	CG	TACGG	NA	0	0	1
UBE2C	2325	-	CHH	TCCTT	NA	0	0	1
UBE2C	2326	-	CHH	CTCCT	NA	0	0	1
UBE2C	2328	-	CHH	AGCTC	NA	0	0	1
UBE2C	2329	+	CHG	AGCTG	0.004	442	111669	1
UBE2C	2331	-	CHG	CTCAG	NA	0	0	1
UBE2C	2333	-	CHH	GGCTC	NA	0	0	1
UBE2C	2334	+	CHG	AGCCG	0.005	554	110981	1
UBE2C	2335	+	CG	GCCGA	0.008	845	110902	1
UBE2C	2336	-	CG	CTCGG	NA	0	0	1
UBE2C	2338	-	CHH	CGCTC	NA	0	0	1
UBE2C	2339	+	CG	AGCGG	0.01	1104	106335	1
UBE2C	2340	-	CG	CCCGC	NA	0	0	1
UBE2C	2341	-	CHG	CCCCG	NA	0	0	1
UBE2C	2342	-	CHH	CCCCC	NA	0	0	1
UBE2C	2343	-	CHH	GCCCC	NA	0	0	1
UBE2C	2344	-	CHH	CGCCC	NA	0	0	1
UBE2C	2345	+	CG	GGCGC	0.011	1193	110993	1
UBE2C	2346	-	CG	GGCGC	NA	0	0	1
UBE2C	2347	+	CHG	CGCCG	0.004	465	112097	1
UBE2C	2348	+	CG	GCCGC	0.005	540	112403	1
UBE2C	2349	-	CG	GGCGG	NA	0	0	1
UBE2C	2350	+	CHH	CGCCC	0.006	699	112240	1
UBE2C	2351	+	CHG	GCCCG	0.01	1121	111868	1
UBE2C	2352	+	CG	CCCGG	0.009	1013	111958	1
UBE2C	2353	-	CG	CCCGG	NA	0	0	1
UBE2C	2354	-	CHG	CCCCG	NA	0	0	1
UBE2C	2355	-	CHH	ACCCC	NA	0	0	1
UBE2C	2356	-	CHH	GACCC	NA	0	0	1
UBE2C	2358	+	CHG	GTCCG	0.005	572	112432	1
UBE2C	2359	+	CG	TCCGG	0.009	989	111994	1
UBE2C	2360	-	CG	ACCGG	NA	0	0	1
UBE2C	2361	-	CHG	CACCG	NA	0	0	1
UBE2C	2363	-	CHH	CCCAC	NA	0	0	1
UBE2C	2364	-	CHH	GCCCA	NA	0	0	1
UBE2C	2365	-	CHH	TGCCC	NA	0	0	1
UBE2C	2366	+	CHH	GGCAA	0.002	208	112819	1
UBE2C	2371	-	CHH	ACCTT	NA	0	0	1
UBE2C	2372	-	CHH	CACCT	NA	0	0	1
UBE2C	2374	-	CHH	CTCAC	NA	0	0	1
UBE2C	2376	-	CHH	CACTC	NA	0	0	1
UBE2C	2378	-	CHH	ATCAC	NA	0	0	1
UBE2C	2381	-	CHH	CGCAT	NA	0	0	1
UBE2C	2382	+	CG	TGCGG	0.237	26552	85627	6.3181e-89
UBE2C	2383	-	CG	GCCGC	NA	0	0	1
UBE2C	2384	-	CHG	GGCCG	NA	0	0	1
UBE2C	2385	+	CHH	GGCCT	0	0	136	1
UBE2C	2386	+	CHH	GCCTA	0	0	43	1
UBE2C	2389	+	CHH	TACCA	NA	0	0	1
UBE2C	2390	+	CHH	ACCAC	NA	0	0	1
UBE2C	2392	+	CHH	CACTC	NA	0	0	1
UBE2C	2394	+	CG	CTCGC	NA	0	0	1
UBE2C	2395	-	CG	GGCGA	NA	0	0	1
UBE2C	2396	+	CHG	CGCCG	NA	0	0	1
UBE2C	2397	+	CG	GCCGG	NA	0	0	1
UBE2C	2398	-	CG	CCCGG	NA	0	0	1
UBE2C	2399	-	CHG	GCCCG	NA	0	0	1
UBE2C	2400	-	CHH	GGCCC	NA	0	0	1
UBE2C	2401	+	CHH	GGCCT	NA	0	0	1
UBE2C	2402	+	CHG	GCCTG	NA	0	0	1
UBE2C	2404	-	CHG	GGCAG	NA	0	0	1
UBE2C	2405	+	CHH	TGCCA	NA	0	0	1
UBE2C	2406	+	CHH	GCCAT	NA	0	0	1
UBE2C	2409	-	CHH	GGCAT	NA	0	0	1
UBE2C	2410	+	CHH	TGCCC	NA	0	0	1
UBE2C	2411	+	CHH	GCCCT	NA	0	0	1
UBE2C	2412	+	CHH	CCCTA	NA	0	0	1
UBE2C	2415	-	CHH	GCCTA	NA	0	0	1
UBE2C	2416	-	CHH	TGCCT	NA	0	0	1
UBE2C	2417	+	CHH	GGCAT	NA	0	0	1
UBE2C	2421	-	CHH	ACCAA	NA	0	0	1
UBE2C	2422	-	CHH	TACCA	NA	0	0	1
UBE2C	2425	+	CHH	TACCC	NA	0	0	1
UBE2C	2426	+	CHH	ACCCA	NA	0	0	1
UBE2C	2427	+	CHG	CCCAG	0	0	9	1
UBE2C	2429	-	CHG	CTCTG	NA	0	0	1
UBE2C	2431	-	CHH	TGCTC	NA	0	0	1
UBE2C	2432	+	CHH	AGCAA	0	41	90183	1
UBE2C	2436	-	CHH	ATCTT	NA	0	0	1
UBE2C	2441	+	CHH	TTCTA	0	29	90888	1
UBE2C	2444	-	CHH	TCCTA	NA	0	0	1
UBE2C	2445	-	CHH	GTCCT	NA	0	0	1
UBE2C	2447	+	CHH	GACCA	0	41	90807	1
UBE2C	2448	+	CHH	ACCAC	0.001	51	90872	1
UBE2C	2450	+	CHH	CACCC	0.001	64	90862	1
UBE2C	2451	+	CHH	ACCCC	0.001	68	90827	1
UBE2C	2452	+	CHH	CCCCC	0.001	52	90847	1
UBE2C	2453	+	CHH	CCCCC	0.001	57	90873	1
UBE2C	2454	+	CHG	CCCCG	0	36	90872	1
UBE2C	2455	+	CG	CCCGC	0.539	48969	41932	0
UBE2C	2456	-	CG	GGCGG	NA	0	0	1
UBE2C	2457	+	CHG	CGCCG	0.001	53	90820	1
UBE2C	2458	+	CG	GCCGC	0.516	46896	43952	0
UBE2C	2459	-	CG	GGCGG	NA	0	0	1
UBE2C	2460	+	CHH	CGCCA	0.001	82	90772	1
UBE2C	2461	+	CHH	GCCAC	0.001	64	90655	1
UBE2C	2463	+	CHH	CACCT	0.001	62	90749	1
UBE2C	2464	+	CHH	ACCTC	0.001	49	90818	1
UBE2C	2466	+	CHH	CTCCT	0	43	90826	1
UBE2C	2467	+	CHG	TCCTG	0.006	528	90301	1
UBE2C	2469	-	CHG	TCCAG	NA	0	0	1
UBE2C	2470	-	CHH	CTCCA	NA	0	0	1
UBE2C	2472	-	CHH	CGCTC	NA	0	0	1
UBE2C	2473	+	CG	AGCGG	0.008	741	89757	1
UBE2C	2474	-	CG	CCCGC	NA	0	0	1
UBE2C	2475	-	CHG	TCCCG	NA	0	0	1
UBE2C	2476	-	CHH	CTCCC	NA	0	0	1
UBE2C	2478	-	CHH	ATCTC	NA	0	0	1
UBE2C	2481	+	CHG	ATCTG	0.008	718	89663	1
UBE2C	2483	-	CHG	CGCAG	NA	0	0	1
UBE2C	2484	+	CG	TGCGG	0.005	451	89899	1
UBE2C	2485	-	CG	CCCGC	NA	0	0	1
UBE2C	2486	-	CHG	ACCCG	NA	0	0	1
UBE2C	2487	-	CHH	CACCC	NA	0	0	1
UBE2C	2489	-	CHH	TGCAC	NA	0	0	1
UBE2C	2490	+	CHG	TGCAG	0.005	462	89656	1
UBE2C	2492	-	CHG	TCCTG	NA	0	0	1
UBE2C	2493	-	CHH	CTCCT	NA	0	0	1
UBE2C	2495	-	CHH	TTCTC	NA	0	0	1
UBE2C	2498	+	CHH	AACAC	0.003	305	89739	1
UBE2C	2500	+	CHH	CACAC	0.007	588	89476	1
UBE2C	2502	+	CHH	CACCA	0.005	431	89592	1
UBE2C	2503	+	CHG	ACCAG	0.007	646	89466	1
UBE2C	2505	-	CHG	TCCTG	NA	0	0	1
UBE2C	2506	-	CHH	CTCCT	NA	0	0	1
UBE2C	2508	-	CHH	AGCTC	NA	0	0	1
UBE2C	2509	+	CHH	AGCTC	0.004	364	92075	1
UBE2C	2511	+	CG	CTCGG	0.004	355	93500	1
UBE2C	2512	-	CG	CCCGA	NA	0	0	1
UBE2C	2513	-	CHG	CCCCG	NA	0	0	1
UBE2C	2514	-	CHH	GCCCC	NA	0	0	1
UBE2C	2515	-	CHH	GGCCC	NA	0	0	1
UBE2C	2516	+	CHH	GGCCT	0.005	440	92086	1
UBE2C	2517	+	CHG	GCCTG	0.004	390	93761	1
UBE2C	2519	-	CHG	GCCAG	NA	0	0	1
UBE2C	2520	-	CHH	TGCCA	NA	0	0	1
UBE2C	2521	+	CHH	GGCAT	0.005	500	91913	1
UBE2C	2525	+	CHH	TTCCC	0.005	445	93837	1
UBE2C	2526	+	CHH	TCCCC	0.007	704	93561	1
UBE2C	2527	+	CHH	CCCCT	0.004	386	93837	1
UBE2C	2528	+	CHG	CCCTG	0.003	322	93440	1
UBE2C	2530	-	CHG	CCCAG	NA	0	0	1
UBE2C	2531	-	CHH	GCCCA	NA	0	0	1
UBE2C	2532	-	CHH	TGCCC	NA	0	0	1
UBE2C	2533	+	CHH	GGCAT	0.005	507	93546	1
UBE2C	2536	-	CHH	CCCAT	NA	0	0	1
UBE2C	2537	-	CHH	ACCCA	NA	0	0	1
UBE2C	2538	-	CHH	CACCC	NA	0	0	1
UBE2C	2540	-	CHH	GACAC	NA	0	0	1
UBE2C	2542	+	CG	GTCGA	0.006	608	93646	1
UBE2C	2543	-	CG	CTCGA	NA	0	0	1
UBE2C	2545	-	CHH	CCCTC	NA	0	0	1
UBE2C	2546	-	CHH	GCCCT	NA	0	0	1
UBE2C	2547	-	CHH	CGCCC	NA	0	0	1
UBE2C	2548	+	CG	GGCGG	0.013	1196	93146	1
UBE2C	2549	-	CG	TCCGC	NA	0	0	1
UBE2C	2550	-	CHG	CTCCG	NA	0	0	1
UBE2C	2552	-	CHH	GTCTC	NA	0	0	1
UBE2C	2554	+	CHH	GACTT	0.004	364	94136	1
UBE2C	2557	+	CHG	TTCCG	0.004	361	93950	1
UBE2C	2558	+	CG	TCCGG	0.005	454	93745	1
UBE2C	2559	-	CG	CCCGG	NA	0	0	1
UBE2C	2560	-	CHG	TCCCG	NA	0	0	1
UBE2C	2561	-	CHH	GTCCC	NA	0	0	1
UBE2C	2563	+	CHH	GACTC	0.003	284	94176	1
UBE2C	2565	+	CHH	CTCCC	0.005	426	93972	1
UBE2C	2566	+	CHH	TCCCA	0.005	448	93932	1
UBE2C	2567	+	CHH	CCCAC	0.009	855	93299	1
UBE2C	2569	+	CHH	CACCT	0.003	320	94066	1
UBE2C	2570	+	CHH	ACCTC	0.006	561	93869	1
UBE2C	2572	+	CHH	CTCCT	0.006	537	91326	1
UBE2C	2573	+	CHH	TCCTT	0.006	586	91229	1
UBE2C	2576	-	CHH	CGCAA	NA	0	0	1
UBE2C	2577	+	CG	TGCGC	0.009	781	90968	1
UBE2C	2578	-	CG	CGCGC	NA	0	0	1
UBE2C	2579	+	CG	CGCGG	0.007	645	91035	1
UBE2C	2580	-	CG	CCCGC	NA	0	0	1
UBE2C	2581	-	CHG	ACCCG	NA	0	0	1
UBE2C	2582	-	CHH	CACCC	NA	0	0	1
UBE2C	2584	-	CHH	CTCAC	NA	0	0	1
UBE2C	2586	-	CHH	ATCTC	NA	0	0	1
UBE2C	2590	+	CG	TTCGA	0.007	645	91260	1
UBE2C	2591	-	CG	CTCGA	NA	0	0	1
UBE2C	2593	-	CHH	CTCTC	NA	0	0	1
UBE2C	2595	-	CHH	ATCTC	NA	0	0	1
UBE2C	2598	-	CHH	CCCAT	NA	0	0	1
UBE2C	2599	-	CHH	CCCCA	NA	0	0	1
UBE2C	2600	-	CHH	CCCCC	NA	0	0	1
UBE2C	2601	-	CHH	TCCCC	NA	0	0	1
UBE2C	2602	-	CHH	GTCCC	NA	0	0	1
UBE2C	2604	+	CHG	GACAG	0.005	448	90728	1
UBE2C	2606	-	CHG	GCCTG	NA	0	0	1
UBE2C	2607	-	CHH	GGCCT	NA	0	0	1
UBE2C	2608	+	CHH	GGCCA	0.006	584	91537	1
UBE2C	2609	+	CHG	GCCAG	0.006	550	91467	1
UBE2C	2611	-	CHG	TCCTG	NA	0	0	1
UBE2C	2612	-	CHH	CTCCT	NA	0	0	1
UBE2C	2614	-	CHH	AGCTC	NA	0	0	1
UBE2C	2615	+	CHH	AGCTC	0.006	553	91665	1
UBE2C	2617	+	CHG	CTCAG	0.004	352	91832	1
UBE2C	2619	-	CHG	GTCTG	NA	0	0	1
UBE2C	2621	+	CHG	GACCG	0.006	527	91720	1
UBE2C	2622	+	CG	ACCGC	0.01	896	91341	1
UBE2C	2623	-	CG	AGCGG	NA	0	0	1
UBE2C	2624	+	CHH	CGCTC	0.004	335	91820	1
UBE2C	2626	+	CHH	CTCTT	0.003	274	91968	1
UBE2C	2630	-	CHH	CTCAA	NA	0	0	1
UBE2C	2632	-	CHH	GTCTC	NA	0	0	1
UBE2C	2634	+	CHH	GACTC	0.003	253	91991	1
UBE2C	2636	+	CHH	CTCTC	0.003	257	92000	1
UBE2C	2638	+	CHH	CTCCC	0.003	255	91985	1
UBE2C	2639	+	CHG	TCCCG	0.004	386	91836	1
UBE2C	2640	+	CG	CCCGA	0.118	10723	80173	4.54605e-17
UBE2C	2641	-	CG	TTCGG	NA	0	0	1
UBE2C	2644	-	CHH	TCCTT	NA	0	0	1
UBE2C	2645	-	CHH	CTCCT	NA	0	0	1
UBE2C	2647	-	CHH	TTCTC	NA	0	0	1
UBE2C	2651	-	CHH	CCCAT	NA	0	0	1
UBE2C	2652	-	CHH	TCCCA	NA	0	0	1
UBE2C	2653	-	CHH	CTCCC	NA	0	0	1
UBE2C	2655	-	CHH	CCCTC	NA	0	0	1
UBE2C	2656	-	CHH	ACCCT	NA	0	0	1
UBE2C	2657	-	CHH	TACCC	NA	0	0	1
UBE2C	2660	-	CHH	CCCTA	NA	0	0	1
UBE2C	2661	-	CHH	CCCCT	NA	0	0	1
UBE2C	2662	-	CHH	GCCCC	NA	0	0	1
UBE2C	2663	-	CHH	CGCCC	NA	0	0	1
UBE2C	2664	+	CG	GGCGC	NA	0	0	1
UBE2C	2665	-	CG	AGCGC	NA	0	0	1
UBE2C	2666	+	CHG	CGCTG	NA	0	0	1
UBE2C	2668	-	CHG	GGCAG	NA	0	0	1
UBE2C	2669	+	CHH	TGCCA	NA	0	0	1
UBE2C	2670	+	CHG	GCCAG	NA	0	0	1
UBE2C	2672	-	CHG	GTCTG	NA	0	0	1
UBE2C	2674	+	CHH	GACTC	NA	0	0	1
UBE2C	2676	+	CHH	CTCCT	NA	0	0	1
UBE2C	2677	+	CHH	TCCTT	NA	0	0	1
UBE2C	2680	+	CHH	TTCCC	NA	0	0	1
UBE2C	2681	+	CHH	TCCCT	NA	0	0	1
UBE2C	2682	+	CHG	CCCTG	NA	0	0	1
UBE2C	2684	-	CHG	ACCAG	NA	0	0	1
UBE2C	2685	-	CHH	CACCA	NA	0	0	1
UBE2C	2687	-	CHH	CCCAC	NA	0	0	1
UBE2C	2688	-	CHH	GCCCA	NA	0	0	1
UBE2C	2689	-	CHH	GGCCC	NA	0	0	1
UBE2C	2690	+	CHH	GGCCT	NA	0	0	1
UBE2C	2691	+	CHH	GCCTA	NA	0	0	1
UBE2C	2694	-	CHH	ATCTA	NA	0	0	1
UBE2C	2697	-	CHH	TTCAT	NA	0	0	1
UBE2C	2700	-	CHH	GTCTT	NA	0	0	1
UBE2C	2702	+	CG	GACGC	NA	0	0	1
UBE2C	2703	-	CG	AGCGT	NA	0	0	1
UBE2C	2704	+	CHH	CGCTC	NA	0	0	1
UBE2C	2706	+	CHH	CTCAA	NA	0	0	1
UBE2C	2709	-	CHH	TCCTT	NA	0	0	1
UBE2C	2710	-	CHH	GTCCT	NA	0	0	1
UBE2C	2712	+	CHH	GACCC	NA	0	0	1
UBE2C	2713	+	CHH	ACCCT	NA	0	0	1
UBE2C	2714	+	CHH	CCCTC	NA	0	0	1
UBE2C	2716	+	CG	CTCGT	NA	0	0	1
UBE2C	2717	-	CG	CACGA	NA	0	0	1
UBE2C	2719	-	CHH	GTCAC	NA	0	0	1
UBE2C	2721	+	CHH	GACTT	NA	0	0	1
UBE2C	2724	-	CHH	GCCAA	NA	0	0	1
UBE2C	2725	-	CHH	GGCCA	NA	0	0	1
UBE2C	2726	+	CHG	GGCCG	NA	0	0	1
UBE2C	2727	+	CG	GCCGA	NA	0	0	1
UBE2C	2728	-	CG	CTCGG	NA	0	0	1
UBE2C	2730	-	CHH	GTCTC	NA	0	0	1
UBE2C	2732	+	CHG	GACAG	NA	0	0	1
UBE2C	2734	-	CHG	CCCTG	NA	0	0	1
UBE2C	2735	-	CHH	CCCCT	NA	0	0	1
UBE2C	2736	-	CHH	TCCCC	NA	0	0	1
UBE2C	2737	-	CHH	TTCCC	NA	0	0	1
UBE2C	2740	-	CHH	CCCTT	NA	0	0	1
UBE2C	2741	-	CHH	TCCCT	NA	0	0	1
UBE2C	2742	-	CHH	CTCCC	NA	0	0	1
UBE2C	2744	-	CHH	TTCTC	NA	0	0	1
UBE2C	2747	-	CHH	AACTT	NA	0	0	1
UBE2C	2750	-	CHH	CTCAA	NA	0	0	1
UBE2C	2752	-	CHH	GACTC	NA	0	0	1
UBE2C	2754	+	CG	GTCGG	NA	0	0	1
UBE2C	2755	-	CG	CCCGA	NA	0	0	1
UBE2C	2756	-	CHG	GCCCG	NA	0	0	1
UBE2C	2757	-	CHH	TGCCC	NA	0	0	1
UBE2C	2758	+	CHH	GGCAA	NA	0	0	1
UBE2C	2761	-	CHH	TCCTT	NA	0	0	1
UBE2C	2762	-	CHH	TTCCT	NA	0	0	1
UBE2C	2765	-	CHH	CTCTT	NA	0	0	1
UBE2C	2767	-	CHH	ATCTC	NA	0	0	1
UBE2C	2770	-	CHH	AGCAT	NA	0	0	1
UBE2C	2771	+	CHH	TGCTA	NA	0	0	1
UBE2C	2776	-	CHH	GGCTT	NA	0	0	1
UBE2C	2777	+	CHH	AGCCT	NA	0	0	1
UBE2C	2778	+	CHG	GCCTG	NA	0	0	1
UBE2C	2780	-	CHG	CCCAG	NA	0	0	1
UBE2C	2781	-	CHH	CCCCA	NA	0	0	1
UBE2C	2782	-	CHH	TCCCC	NA	0	0	1
UBE2C	2783	-	CHH	TTCCC	NA	0	0	1
UBE2C	2790	-	CHH	TTCTT	NA	0	0	1
UBE2C	2793	+	CHH	AACAT	NA	0	0	1
UBE2C	2796	-	CHH	GGCAT	NA	0	0	1
UBE2C	2797	+	CHH	TGCCA	NA	0	0	1
UBE2C	2798	+	CHG	GCCAG	NA	0	0	1
UBE2C	2800	-	CHG	TTCTG	NA	0	0	1
UBE2C	2804	+	CHH	ATCAT	NA	0	0	1
UBE2C	2807	+	CHH	ATCCC	NA	0	0	1
UBE2C	2808	+	CHG	TCCCG	NA	0	0	1
UBE2C	2809	+	CG	CCCGA	NA	0	0	1
UBE2C	2810	-	CG	CTCGG	NA	0	0	1
UBE2C	2812	-	CHH	CCCTC	NA	0	0	1
UBE2C	2813	-	CHH	TCCCT	NA	0	0	1
UBE2C	2814	-	CHH	CTCCC	NA	0	0	1
UBE2C	2816	-	CHH	GACTC	NA	0	0	1
UBE2C	2818	+	CHG	GTCTG	NA	0	0	1
UBE2C	2820	-	CHG	TCCAG	NA	0	0	1
UBE2C	2821	-	CHH	TTCCA	NA	0	0	1
UBE2C	2827	-	CHH	CCCTA	NA	0	0	1
UBE2C	2828	-	CHH	TCCCT	NA	0	0	1
UBE2C	2829	-	CHH	CTCCC	NA	0	0	1
UBE2C	2831	-	CHH	CCCTC	NA	0	0	1
UBE2C	2832	-	CHH	ACCCT	NA	0	0	1
UBE2C	2833	-	CHH	CACCC	NA	0	0	1
UBE2C	2835	-	CHH	CTCAC	NA	0	0	1
UBE2C	2837	-	CHH	TCCTC	NA	0	0	1
UBE2C	2838	-	CHH	GTCCT	NA	0	0	1
UBE2C	2840	+	CHH	GACTC	NA	0	0	1
UBE2C	2842	+	CG	CTCGC	NA	0	0	1
UBE2C	2843	-	CG	AGCGA	NA	0	0	1
UBE2C	2844	+	CHH	CGCTA	NA	0	0	1
UBE2C	2847	-	CHH	TCCTA	NA	0	0	1
UBE2C	2848	-	CHH	ATCCT	NA	0	0	1
UBE2C	2851	+	CG	ATCGT	NA	0	0	1
UBE2C	2852	-	CG	GACGA	NA	0	0	1
UBE2C	2854	+	CHH	GTCCT	NA	0	0	1
UBE2C	2855	+	CHG	TCCTG	NA	0	0	1
UBE2C	2857	-	CHG	CACAG	NA	0	0	1
UBE2C	2859	-	CHH	TCCAC	NA	0	0	1
UBE2C	2860	-	CHH	ATCCA	NA	0	0	1
UBE2C	2863	+	CHG	ATCTG	NA	0	0	1
UBE2C	2865	-	CHG	ACCAG	NA	0	0	1
UBE2C	2866	-	CHH	CACCA	NA	0	0	1
UBE2C	2868	-	CHH	CTCAC	NA	0	0	1
UBE2C	2870	-	CHH	TACTC	NA	0	0	1
UBE2C	2875	+	CHH	TACCC	NA	0	0	1
UBE2C	2876	+	CHH	ACCCT	NA	0	0	1
UBE2C	2877	+	CHG	CCCTG	NA	0	0	1
UBE2C	2879	-	CHG	CTCAG	NA	0	0	1
UBE2C	2881	-	CHH	AGCTC	NA	0	0	1
UBE2C	2882	+	CHG	AGCTG	NA	0	0	1
UBE2C	2884	-	CHG	CTCAG	NA	0	0	1
UBE2C	2886	-	CHH	GGCTC	NA	0	0	1
UBE2C	2887	+	CHH	AGCCT	NA	0	0	1
UBE2C	2888	+	CHG	GCCTG	NA	0	0	1
UBE2C	2890	-	CHG	GTCAG	NA	0	0	1
UBE2C	2892	+	CHH	GACCT	NA	0	0	1
UBE2C	2893	+	CHH	ACCTT	NA	0	0	1
UBE2C	2896	-	CHH	ACCAA	NA	0	0	1
UBE2C	2897	-	CHH	CACCA	NA	0	0	1
UBE2C	2899	-	CHH	ATCAC	NA	0	0	1
UBE2C	2902	-	CHH	CACAT	NA	0	0	1
UBE2C	2904	-	CHH	CCCAC	NA	0	0	1
UBE2C	2905	-	CHH	CCCCA	NA	0	0	1
UBE2C	2906	-	CHH	TCCCC	NA	0	0	1
UBE2C	2907	-	CHH	CTCCC	NA	0	0	1
UBE2C	2909	-	CHH	GGCTC	NA	0	0	1
UBE2C	2910	+	CHH	AGCCT	NA	0	0	1
UBE2C	2911	+	CHH	GCCTC	NA	0	0	1
UBE2C	2913	+	CHH	CTCCA	NA	0	0	1
UBE2C	2914	+	CHH	TCCAT	NA	0	0	1
UBE2C	2917	-	CHH	GTCAT	NA	0	0	1
UBE2C	2919	+	CG	GACGG	NA	0	0	1
UBE2C	2920	-	CG	GCCGT	NA	0	0	1
UBE2C	2921	-	CHG	AGCCG	NA	0	0	1
UBE2C	2922	+	CHH	GGCTC	NA	0	0	1
UBE2C	2924	+	CHH	CTCCC	NA	0	0	1
UBE2C	2925	+	CHH	TCCCC	NA	0	0	1
UBE2C	2926	+	CHH	CCCCC	NA	0	0	1
UBE2C	2927	+	CHH	CCCCT	NA	0	0	1
UBE2C	2928	+	CHG	CCCTG	NA	0	0	1
UBE2C	2930	-	CHG	CTCAG	NA	0	0	1
UBE2C	2932	-	CHH	ATCTC	NA	0	0	1
UBE2C	2936	+	CHG	TTCAG	NA	0	0	1
UBE2C	2938	-	CHG	ACCTG	NA	0	0	1
UBE2C	2939	-	CHH	CACCT	NA	0	0	1
UBE2C	2941	-	CHH	CCCAC	NA	0	0	1
UBE2C	2942	-	CHH	TCCCA	NA	0	0	1
UBE2C	2943	-	CHH	CTCCC	NA	0	0	1
UBE2C	2945	-	CHH	TTCTC	NA	0	0	1
UBE2C	2948	-	CHH	ATCTT	NA	0	0	1
UBE2C	2951	-	CHH	TGCAT	NA	0	0	1
UBE2C	2952	+	CHH	TGCAC	NA	0	0	1
UBE2C	2954	+	CHG	CACCG	NA	0	0	1
UBE2C	2955	+	CG	ACCGT	NA	0	0	1
UBE2C	2956	-	CG	GACGG	NA	0	0	1
UBE2C	2958	+	CHG	GTCTG	NA	0	0	1
UBE2C	2960	-	CHG	TCCAG	NA	0	0	1
UBE2C	2961	-	CHH	CTCCA	NA	0	0	1
UBE2C	2963	-	CHH	GCCTC	NA	0	0	1
UBE2C	2964	-	CHH	GGCCT	NA	0	0	1
UBE2C	2965	+	CHH	GGCCT	NA	0	0	1
UBE2C	2966	+	CHG	GCCTG	NA	0	0	1
UBE2C	2968	-	CHG	GCCAG	NA	0	0	1
UBE2C	2969	-	CHH	GGCCA	NA	0	0	1
UBE2C	2970	+	CHH	GGCCC	NA	0	0	1
UBE2C	2971	+	CHH	GCCCA	NA	0	0	1
UBE2C	2972	+	CHH	CCCAT	NA	0	0	1
UBE2C	2975	+	CHH	ATCCA	NA	0	0	1
UBE2C	2976	+	CHG	TCCAG	NA	0	0	1
UBE2C	2978	-	CHG	GTCTG	NA	0	0	1
UBE2C	2980	+	CHH	GACTC	NA	0	0	1
UBE2C	2982	+	CHH	CTCCC	NA	0	0	1
UBE2C	2983	+	CHH	TCCCA	NA	0	0	1
UBE2C	2984	+	CHG	CCCAG	NA	0	0	1
UBE2C	2986	-	CHG	ACCTG	NA	0	0	1
UBE2C	2987	-	CHH	TACCT	NA	0	0	1
UBE2C	2991	+	CHH	AACCC	NA	0	0	1
UBE2C	2992	+	CHH	ACCCC	NA	0	0	1
UBE2C	2993	+	CHG	CCCCG	NA	0	0	1
UBE2C	2994	+	CG	CCCGA	NA	0	0	1
UBE2C	2995	-	CG	TTCGG	NA	0	0	1
UBE2C	3000	+	CHH	TACTC	NA	0	0	1
UBE2C	3002	+	CHH	CTCTT	NA	0	0	1
UBE2C	3009	+	CHG	TTCAG	NA	0	0	1
UBE2C	3011	-	CHG	GCCTG	NA	0	0	1
UBE2C	3012	-	CHH	AGCCT	NA	0	0	1
UBE2C	3013	+	CHH	GGCTA	NA	0	0	1
UBE2C	3016	+	CHG	TACAG	NA	0	0	1
UBE2C	3018	-	CHG	TGCTG	NA	0	0	1
UBE2C	3019	+	CHG	AGCAG	NA	0	0	1
UBE2C	3021	-	CHG	TCCTG	NA	0	0	1
UBE2C	3022	-	CHH	CTCCT	NA	0	0	1
UBE2C	3024	-	CHH	AGCTC	NA	0	0	1
UBE2C	3025	+	CHG	AGCTG	NA	0	0	1
UBE2C	3027	-	CHG	ATCAG	NA	0	0	1
UBE2C	3030	-	CHH	GTCAT	NA	0	0	1
UBE2C	3032	+	CHH	GACCC	NA	0	0	1
UBE2C	3033	+	CHH	ACCCT	NA	0	0	1
UBE2C	3034	+	CHH	CCCTC	NA	0	0	1
UBE2C	3036	+	CHH	CTCAT	NA	0	0	1
UBE2C	3039	-	CHH	ACCAT	NA	0	0	1
UBE2C	3040	-	CHH	CACCA	NA	0	0	1
UBE2C	3042	-	CHH	CTCAC	NA	0	0	1
UBE2C	3044	-	CHH	CACTC	NA	0	0	1
UBE2C	3046	-	CHH	ATCAC	NA	0	0	1
UBE2C	3052	-	CHH	CACTT	NA	0	0	1
UBE2C	3054	-	CHH	GGCAC	NA	0	0	1
UBE2C	3055	+	CHH	TGCCC	NA	0	0	1
UBE2C	3056	+	CHH	GCCCA	NA	0	0	1
UBE2C	3057	+	CHG	CCCAG	NA	0	0	1
UBE2C	3059	-	CHG	TTCTG	NA	0	0	1
UBE2C	3062	+	CHH	AACCC	NA	0	0	1
UBE2C	3063	+	CHH	ACCCC	NA	0	0	1
UBE2C	3064	+	CHH	CCCCA	NA	0	0	1
UBE2C	3065	+	CHG	CCCAG	NA	0	0	1
UBE2C	3067	-	CHG	GGCTG	NA	0	0	1
UBE2C	3068	+	CHH	AGCCT	NA	0	0	1
UBE2C	3069	+	CHH	GCCTT	NA	0	0	1
UBE2C	3072	+	CHH	TTCCA	NA	0	0	1
UBE2C	3073	+	CHH	TCCAT	NA	0	0	1
UBE2C	3076	+	CHH	ATCCA	NA	0	0	1
UBE2C	3077	+	CHH	TCCAA	NA	0	0	1
UBE2C	3084	+	CHG	TTCAG	NA	0	0	1
UBE2C	3086	-	CHG	TACTG	NA	0	0	1
UBE2C	3089	-	CHH	GGCTA	NA	0	0	1
UBE2C	3090	+	CHH	AGCCT	NA	0	0	1
UBE2C	3091	+	CHH	GCCTC	NA	0	0	1
UBE2C	3093	+	CHH	CTCCT	NA	0	0	1
UBE2C	3094	+	CHH	TCCTT	NA	0	0	1
UBE2C	3101	+	CHG	TTCCG	NA	0	0	1
UBE2C	3102	+	CG	TCCGT	NA	0	0	1
UBE2C	3103	-	CG	GACGG	NA	0	0	1
UBE2C	3105	+	CHG	GTCAG	NA	0	0	1
UBE2C	3107	-	CHG	AGCTG	NA	0	0	1
UBE2C	3108	+	CHH	AGCTT	NA	0	0	1
UBE2C	3115	-	CHH	AGCAA	NA	0	0	1
UBE2C	3116	+	CHH	TGCTA	NA	0	0	1
UBE2C	3119	-	CHH	GTCTA	NA	0	0	1
UBE2C	3121	+	CHH	GACAT	NA	0	0	1
UBE2C	3125	-	CHH	CCCTA	NA	0	0	1
UBE2C	3126	-	CHH	CCCCT	NA	0	0	1
UBE2C	3127	-	CHH	ACCCC	NA	0	0	1
UBE2C	3128	-	CHH	TACCC	NA	0	0	1
UBE2C	3133	-	CHH	TACAT	NA	0	0	1
UBE2C	3140	-	CHH	AGCAA	NA	0	0	1
UBE2C	3141	+	CHH	TGCTC	NA	0	0	1
UBE2C	3143	+	CHH	CTCCC	NA	0	0	1
UBE2C	3144	+	CHH	TCCCT	NA	0	0	1
UBE2C	3145	+	CHH	CCCTC	NA	0	0	1
UBE2C	3147	+	CHH	CTCCT	NA	0	0	1
UBE2C	3148	+	CHG	TCCTG	NA	0	0	1
UBE2C	3150	-	CHG	CCCAG	NA	0	0	1
UBE2C	3151	-	CHH	TCCCA	NA	0	0	1
UBE2C	3152	-	CHH	TTCCC	NA	0	0	1
UBE2C	3156	-	CHH	TTCTT	NA	0	0	1
UBE2C	3159	-	CHH	AACTT	NA	0	0	1
UBE2C	3162	+	CHH	TTCAT	NA	0	0	1
UBE2C	3166	+	CHH	TACAC	NA	0	0	1
UBE2C	3168	+	CHH	CACCC	NA	0	0	1
UBE2C	3169	+	CHH	ACCCC	NA	0	0	1
UBE2C	3170	+	CHH	CCCCA	NA	0	0	1
UBE2C	3171	+	CHH	CCCAC	NA	0	0	1
UBE2C	3173	+	CHH	CACCT	NA	0	0	1
UBE2C	3174	+	CHH	ACCTA	NA	0	0	1
UBE2C	3177	+	CHH	TACAC	NA	0	0	1
UBE2C	3179	+	CHH	CACCA	NA	0	0	1
UBE2C	3180	+	CHH	ACCAT	NA	0	0	1
UBE2C	3185	+	CHH	TTCTT	NA	0	0	1
UBE2C	3188	+	CHH	TTCCA	NA	0	0	1
UBE2C	3189	+	CHG	TCCAG	NA	0	0	1
UBE2C	3191	-	CHG	TGCTG	NA	0	0	1
UBE2C	3192	+	CHG	AGCAG	NA	0	0	1
UBE2C	3194	-	CHG	GACTG	NA	0	0	1
UBE2C	3196	+	CHH	GTCCC	NA	0	0	1
UBE2C	3197	+	CHH	TCCCT	NA	0	0	1
UBE2C	3198	+	CHH	CCCTC	NA	0	0	1
UBE2C	3200	+	CHH	CTCCT	NA	0	0	1
UBE2C	3201	+	CHH	TCCTC	NA	0	0	1
UBE2C	3203	+	CHH	CTCCC	NA	0	0	1
UBE2C	3204	+	CHH	TCCCA	NA	0	0	1
UBE2C	3205	+	CHH	CCCAA	NA	0	0	1
UBE2C	3210	+	CHH	TTCCA	NA	0	0	1
UBE2C	3211	+	CHH	TCCAT	NA	0	0	1
UBE2C	3214	+	CHH	ATCCC	NA	0	0	1
UBE2C	3215	+	CHH	TCCCC	NA	0	0	1
UBE2C	3216	+	CHH	CCCCC	NA	0	0	1
UBE2C	3217	+	CHH	CCCCC	NA	0	0	1
UBE2C	3218	+	CHH	CCCCA	NA	0	0	1
UBE2C	3219	+	CHH	CCCAC	NA	0	0	1
UBE2C	3221	+	CHH	CACAC	NA	0	0	1
UBE2C	3223	+	CG	CACGA	NA	0	0	1
UBE2C	3224	-	CG	TTCGT	NA	0	0	1
UBE2C	3227	-	CHH	AACTT	NA	0	0	1
UBE2C	3232	+	CHH	ATCTC	NA	0	0	1
UBE2C	3234	+	CG	CTCGA	NA	0	0	1
UBE2C	3235	-	CG	TTCGA	NA	0	0	1
UBE2C	3238	+	CHH	AACAC	NA	0	0	1
UBE2C	3240	+	CHH	CACTT	NA	0	0	1
UBE2C	3243	+	CHH	TTCCC	NA	0	0	1
UBE2C	3244	+	CHH	TCCCT	NA	0	0	1
UBE2C	3245	+	CHG	CCCTG	NA	0	0	1
UBE2C	3247	-	CHG	TTCAG	NA	0	0	1
UBE2C	3250	-	CHH	GACTT	NA	0	0	1
UBE2C	3252	+	CHH	GTCAT	NA	0	0	1
UBE2C	3256	+	CHH	TACAA	NA	0	0	1
UBE2C	3259	-	CHH	GTCTT	NA	0	0	1
UBE2C	3261	+	CHH	GACCC	NA	0	0	1
UBE2C	3262	+	CHH	ACCCT	NA	0	0	1
UBE2C	3263	+	CHH	CCCTC	NA	0	0	1
UBE2C	3265	+	CHH	CTCCC	NA	0	0	1
UBE2C	3266	+	CHH	TCCCT	NA	0	0	1
UBE2C	3267	+	CHH	CCCTA	NA	0	0	1
UBE2C	3271	+	CHH	ATCCA	NA	0	0	1
UBE2C	3272	+	CHG	TCCAG	NA	0	0	1
UBE2C	3274	-	CHG	CACTG	NA	0	0	1
UBE2C	3276	-	CHH	CACAC	NA	0	0	1
UBE2C	3278	-	CHH	GACAC	NA	0	0	1
UBE2C	3280	+	CHH	GTCCC	NA	0	0	1
UBE2C	3281	+	CHH	TCCCT	NA	0	0	1
UBE2C	3282	+	CHH	CCCTA	NA	0	0	1
UBE2C	3285	+	CHH	TACTT	NA	0	0	1
UBE2C	3288	+	CHH	TTCCT	NA	0	0	1
UBE2C	3289	+	CHH	TCCTA	NA	0	0	1
UBE2C	3292	-	CHH	GGCTA	NA	0	0	1
UBE2C	3293	+	CHH	AGCCC	NA	0	0	1
UBE2C	3294	+	CHH	GCCCC	NA	0	0	1
UBE2C	3295	+	CHH	CCCCA	NA	0	0	1
UBE2C	3296	+	CHH	CCCAA	NA	0	0	1
UBE2C	3299	+	CHH	AACCA	NA	0	0	1
UBE2C	3300	+	CHH	NACCA	NA	0	0	1
